# Supplementary material for: Large transcription units unify copy number variants and common fragile sites arising under replication stress
Source: PubMed Central journal article supplement (PMC4315293; doi:10.1101/gr.177121.114), 2015-02

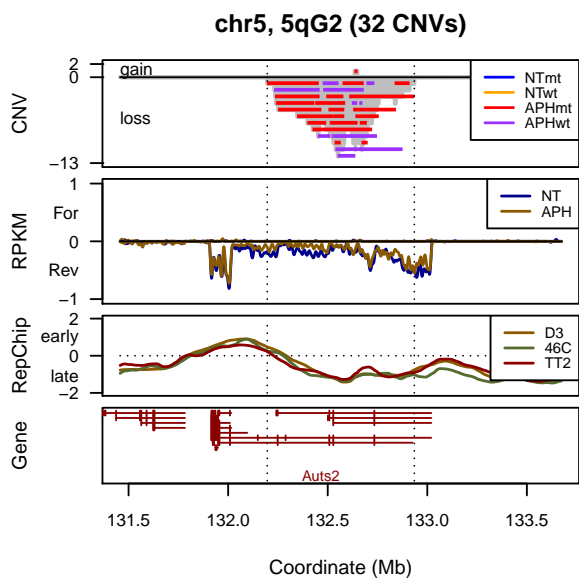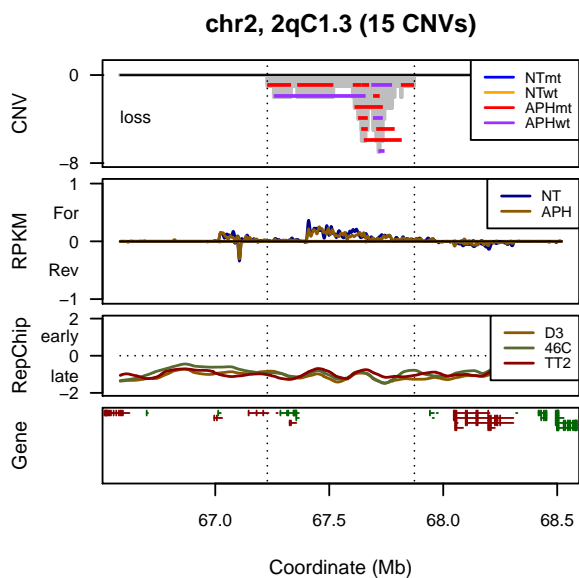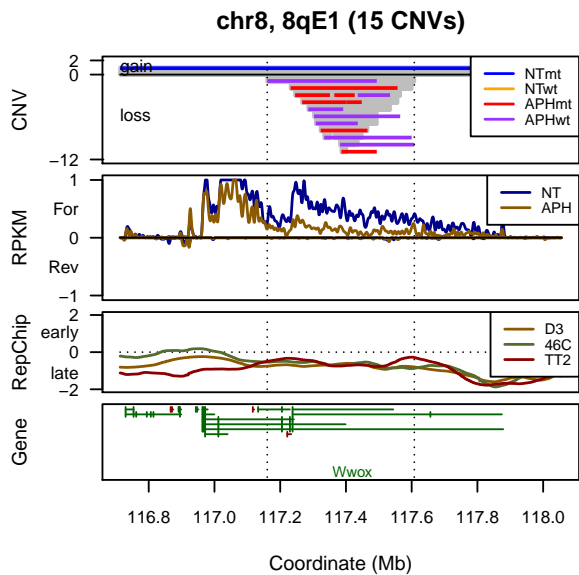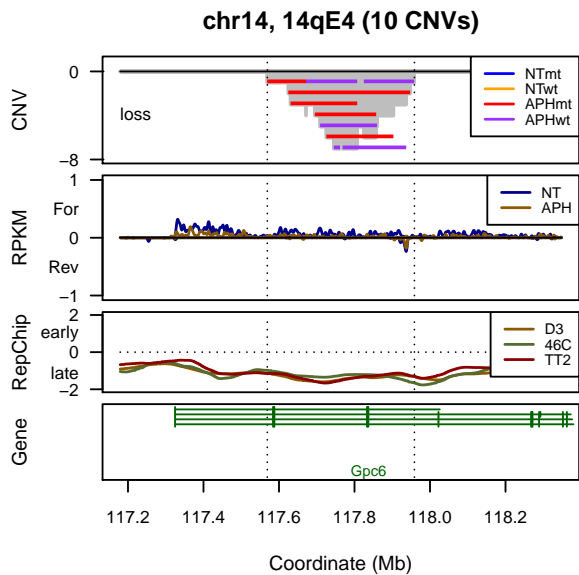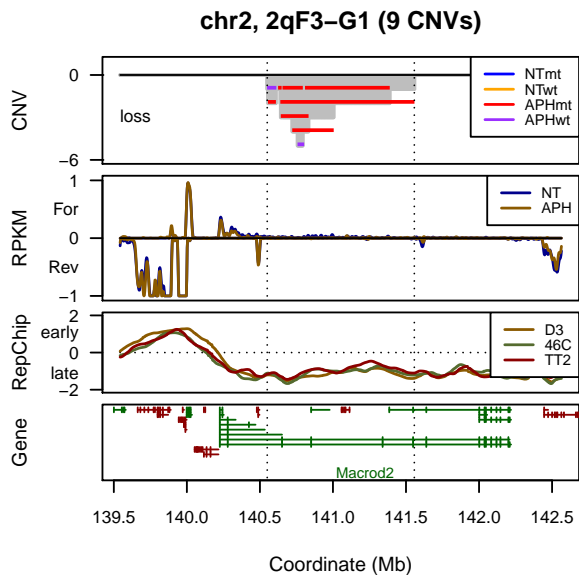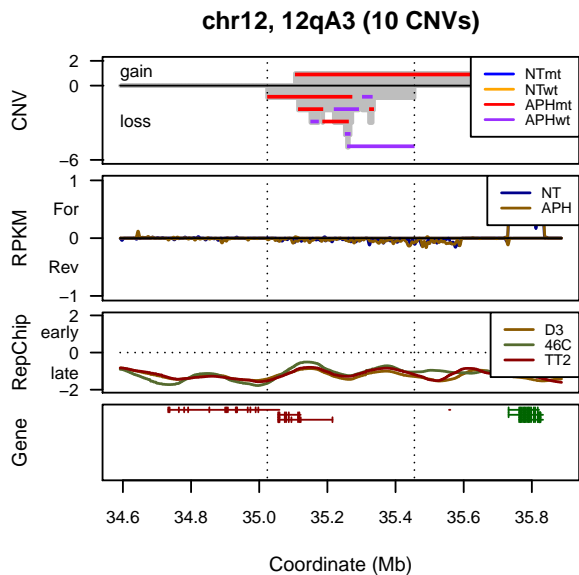

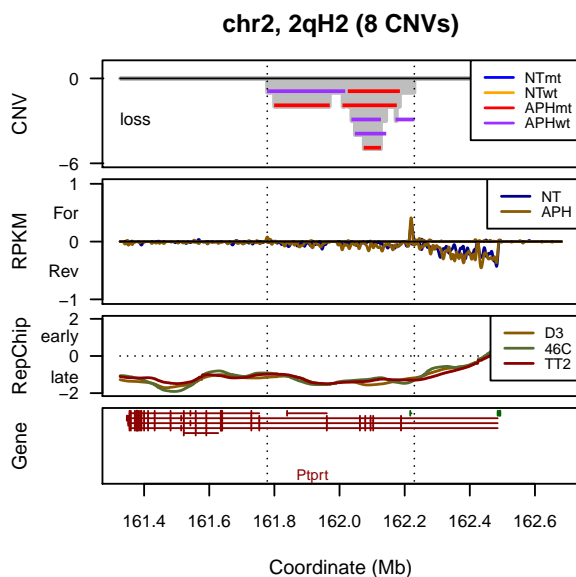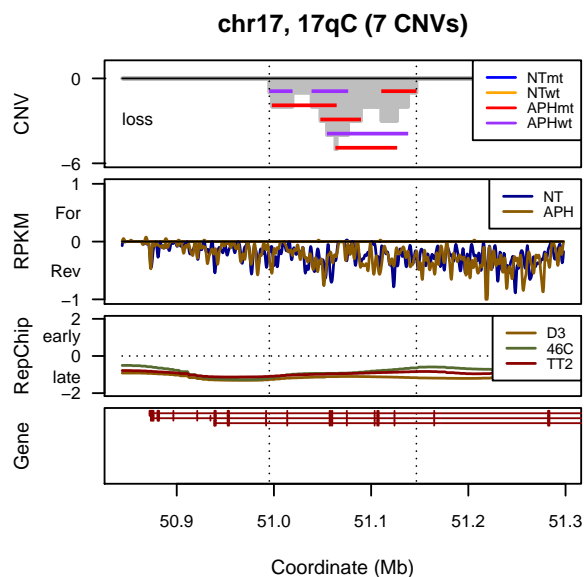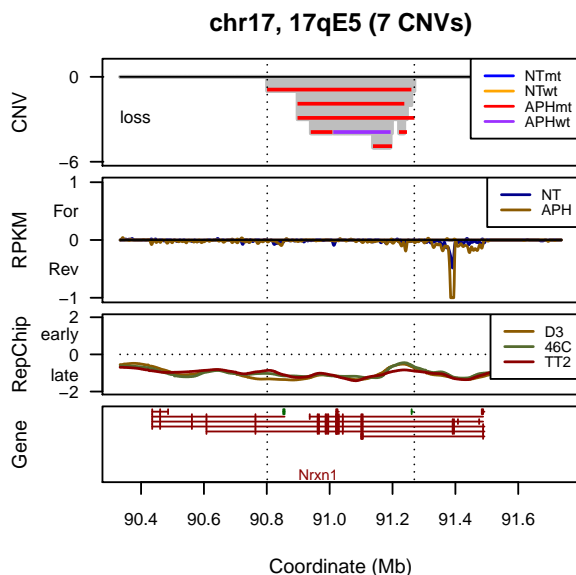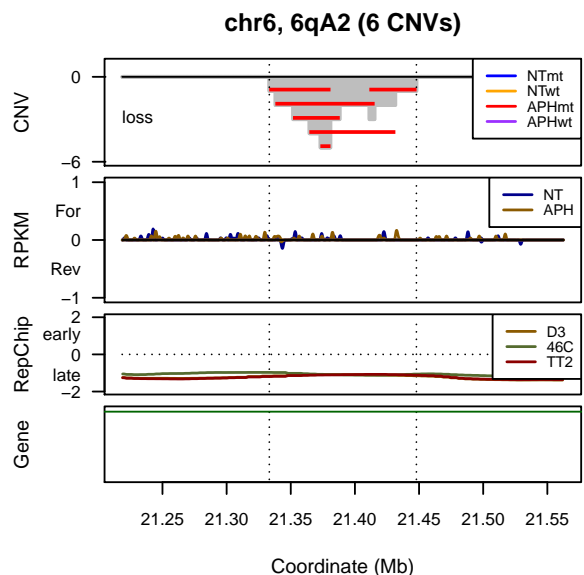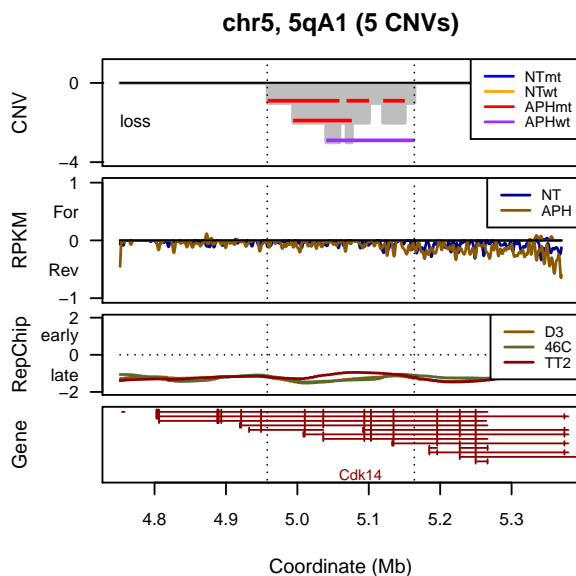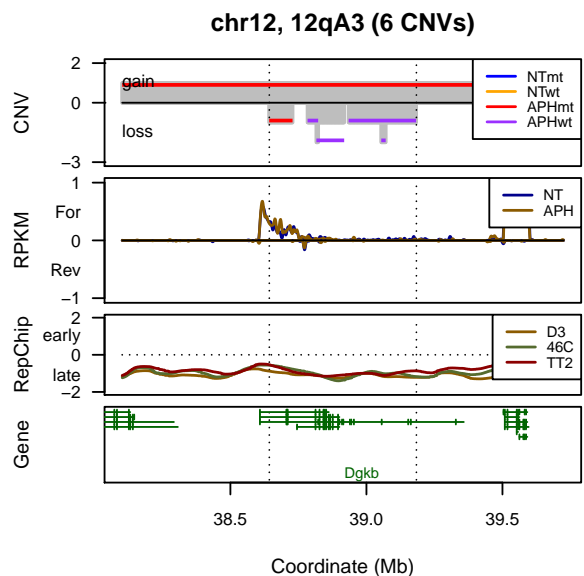

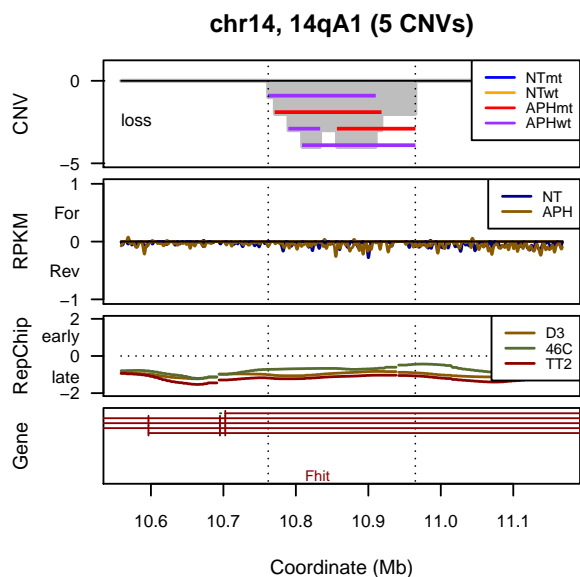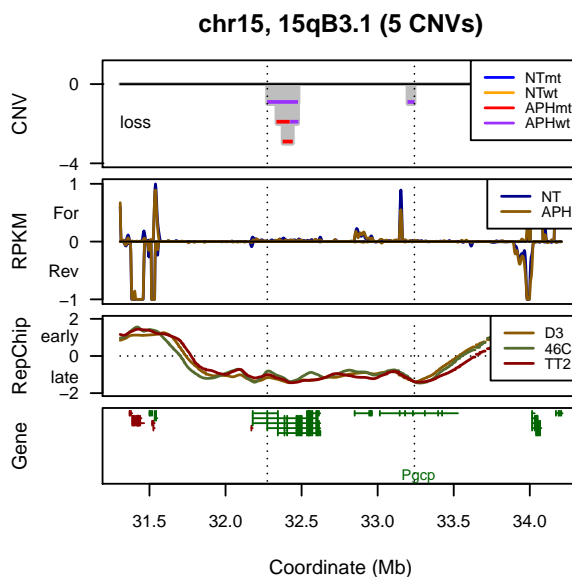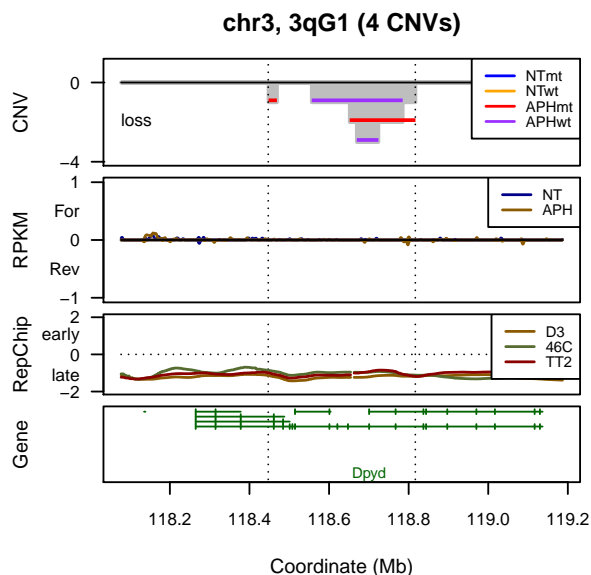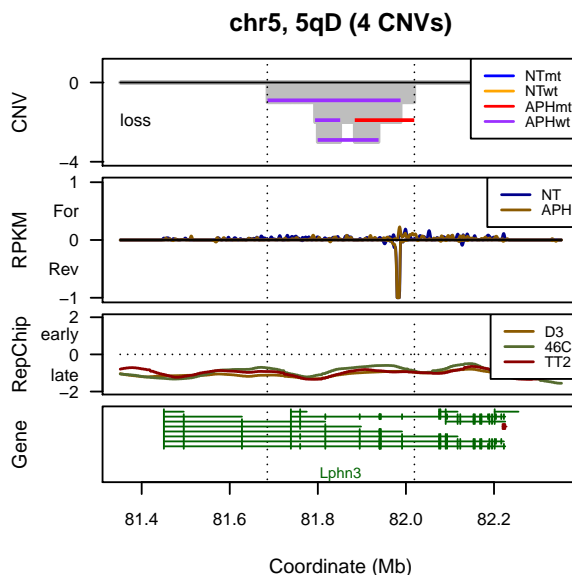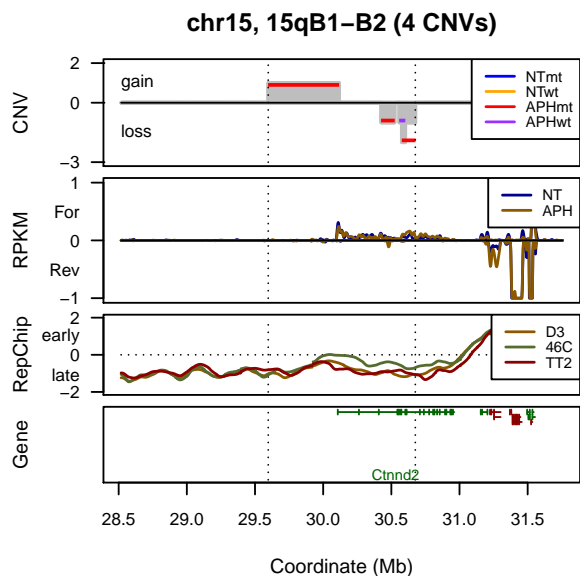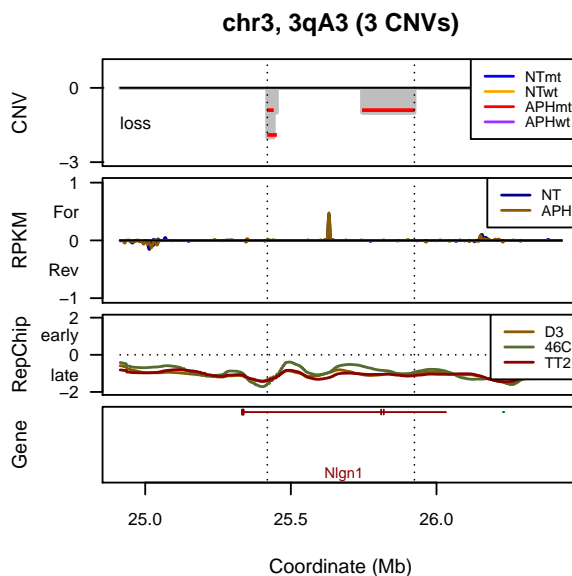

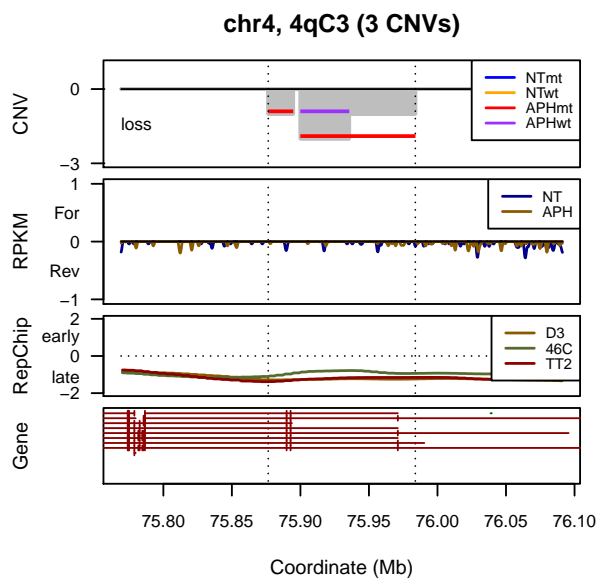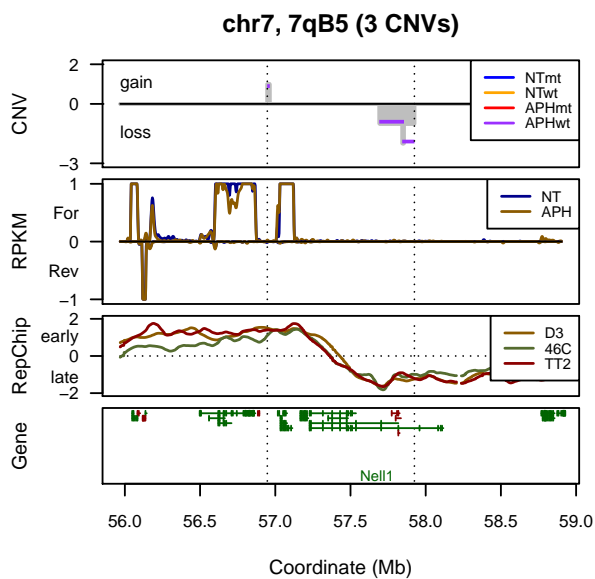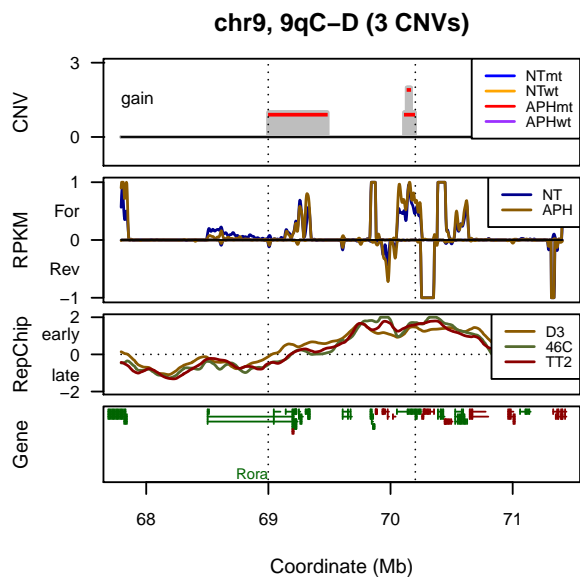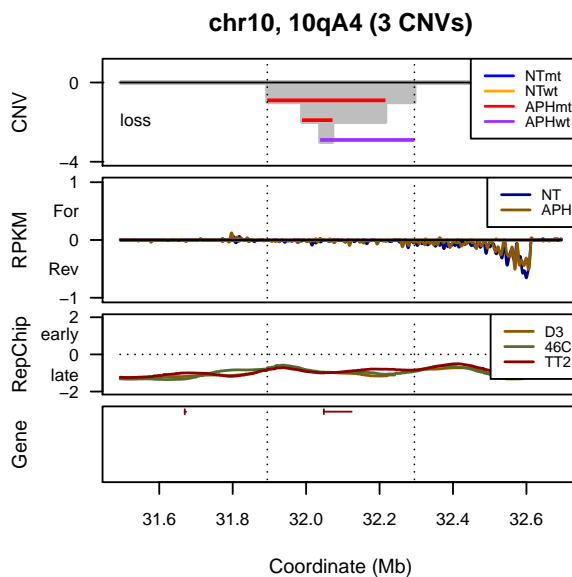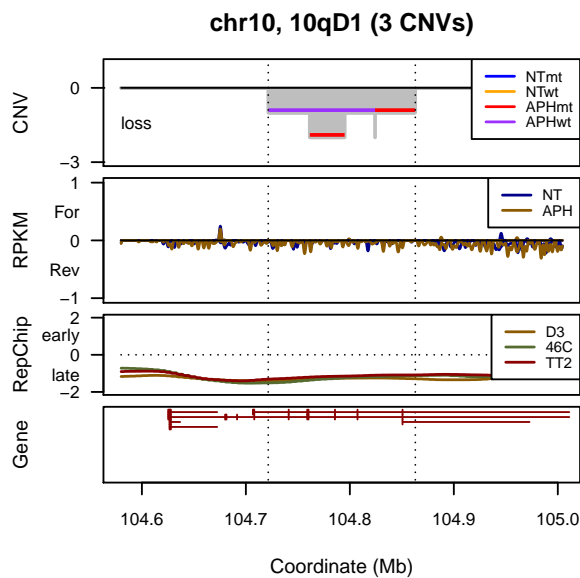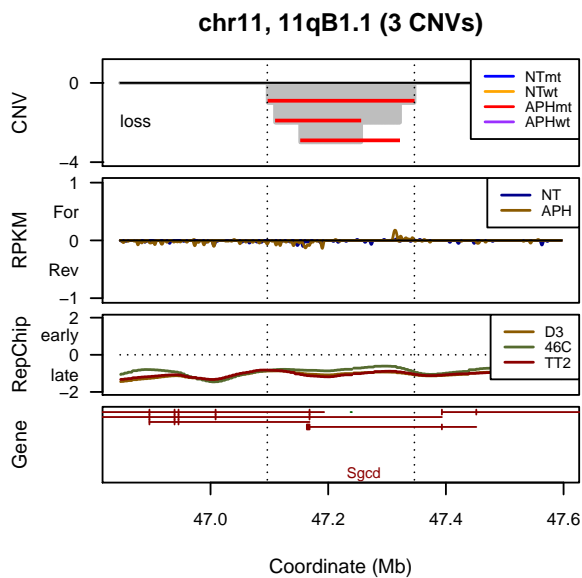

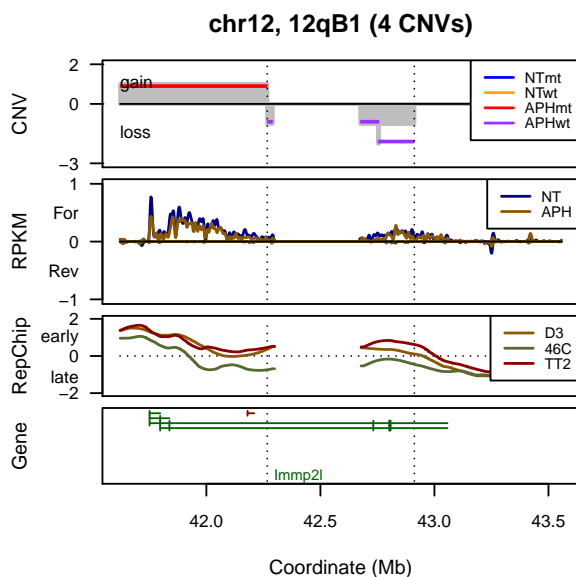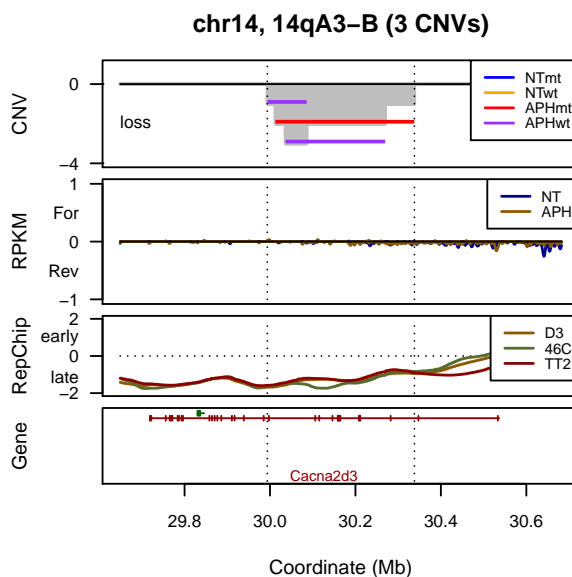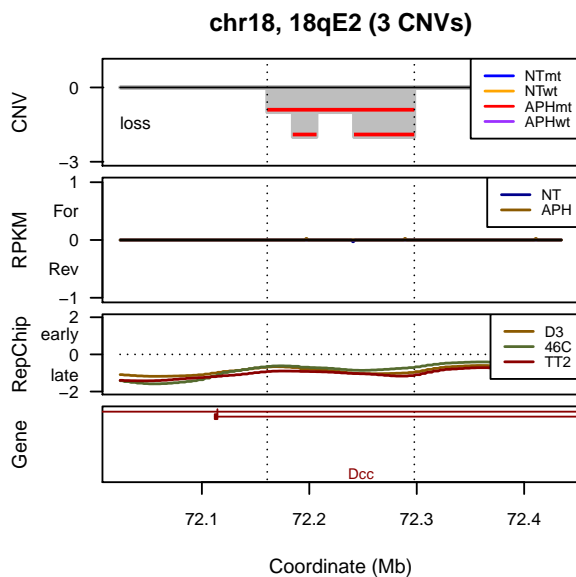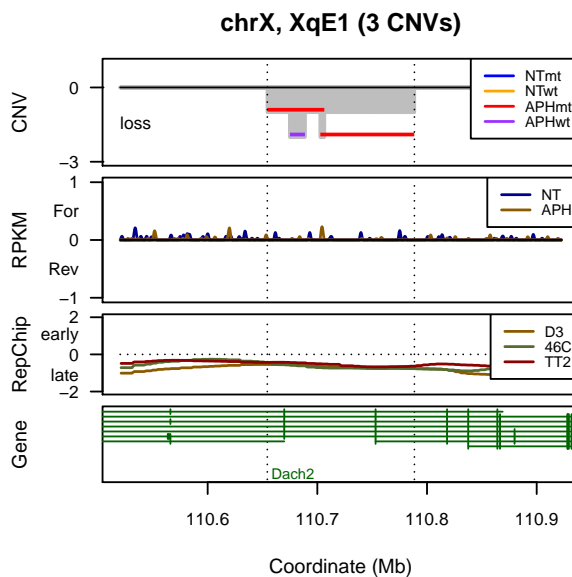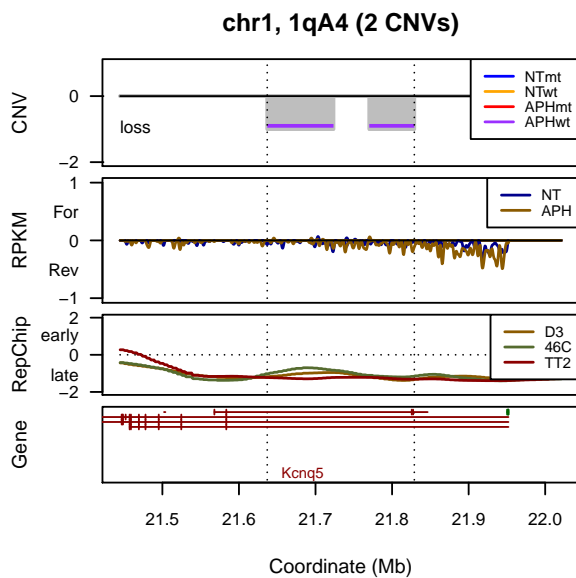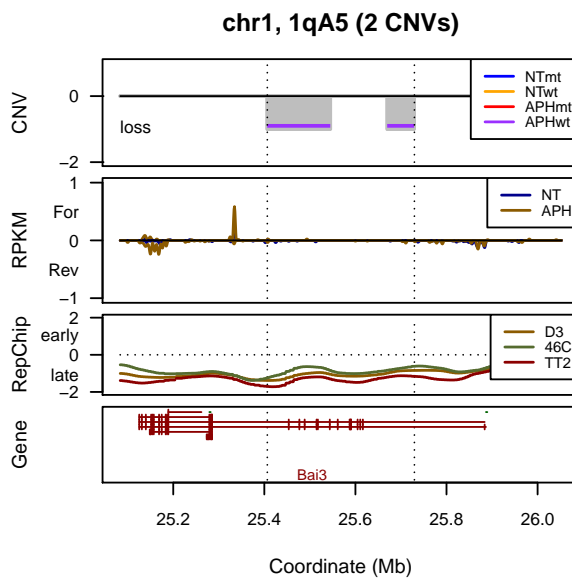

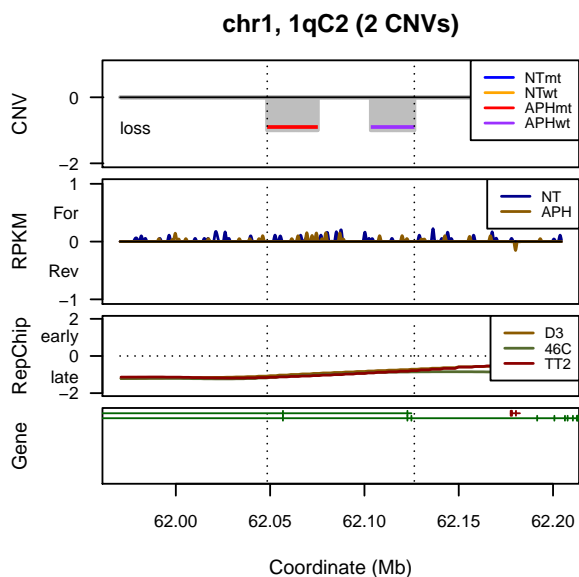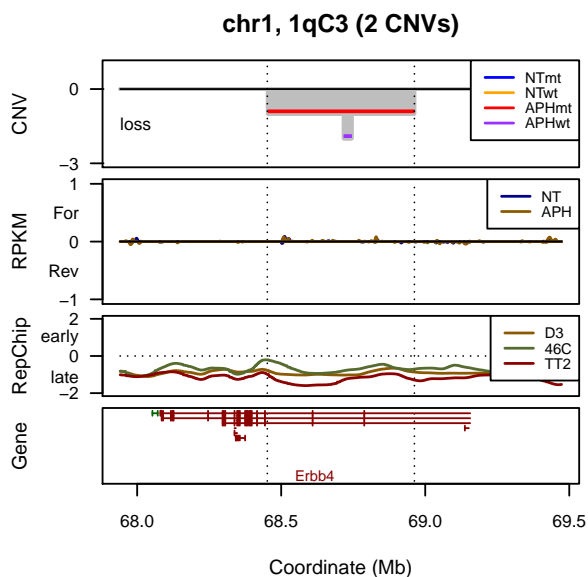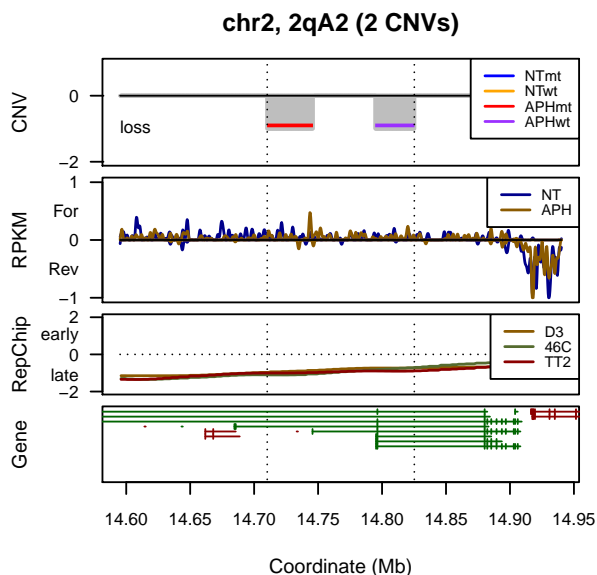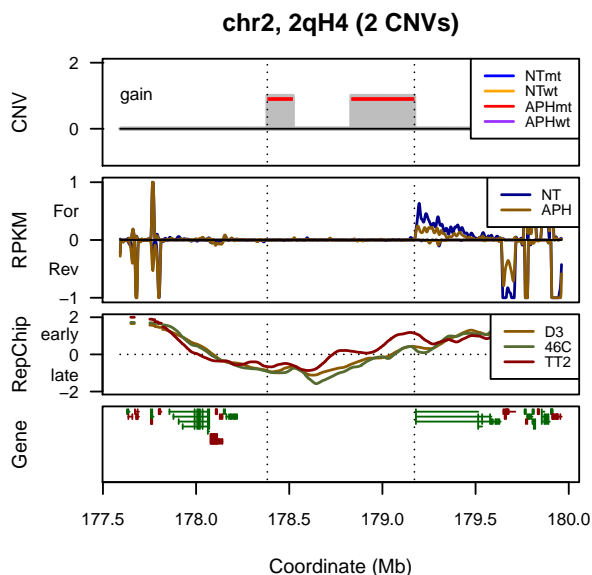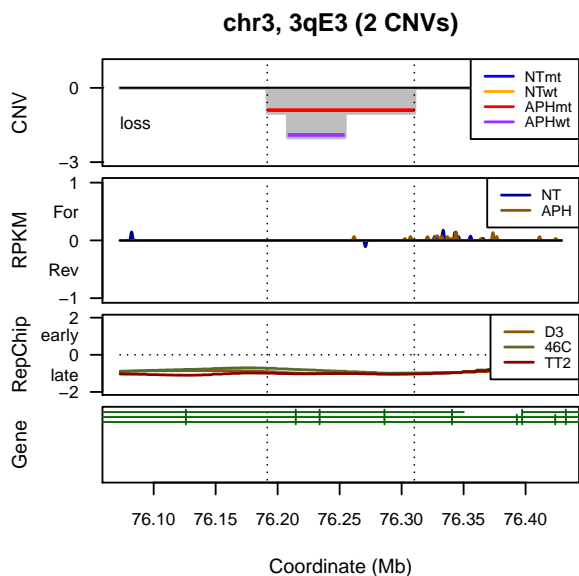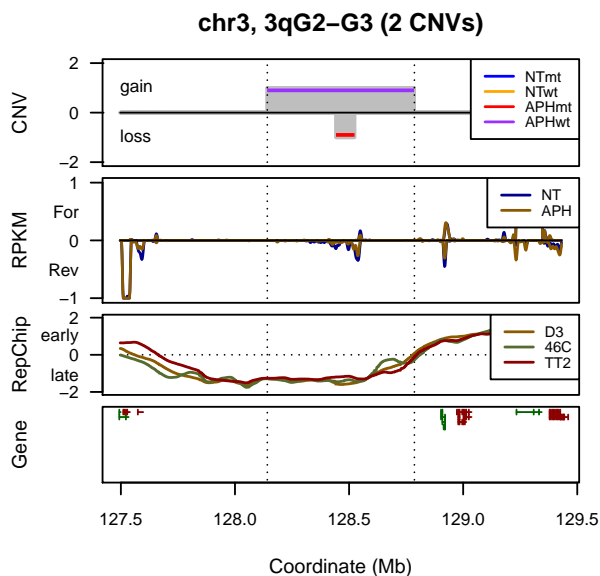

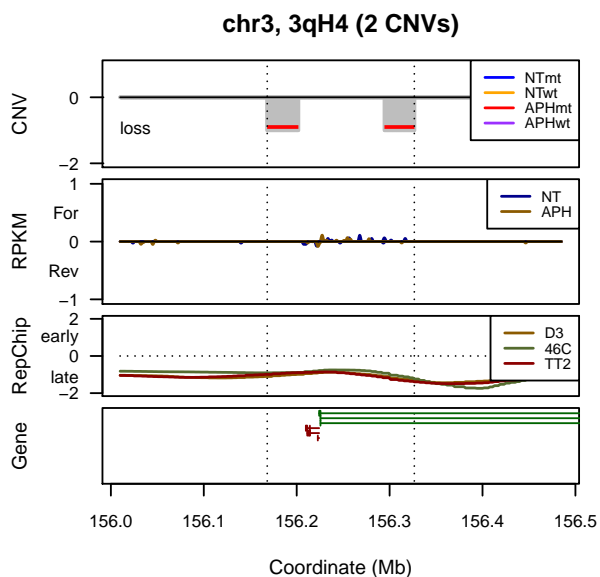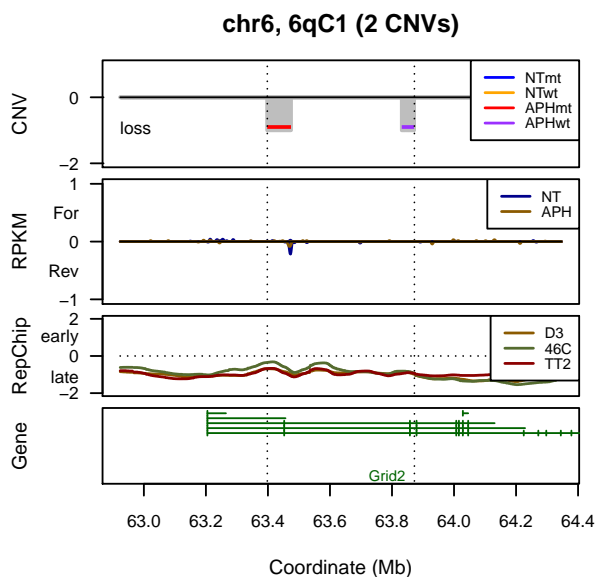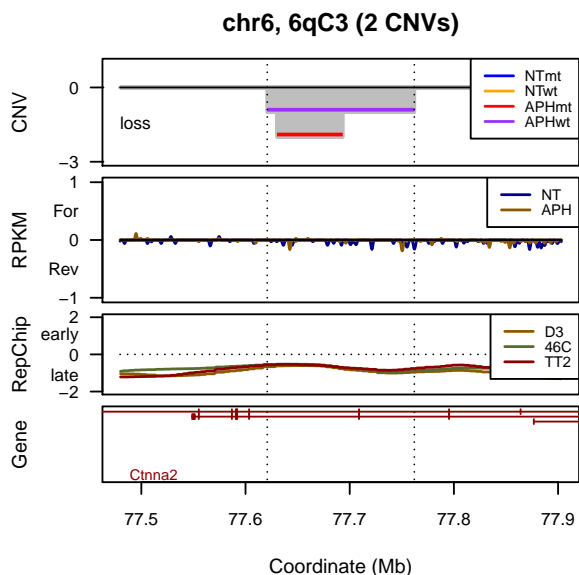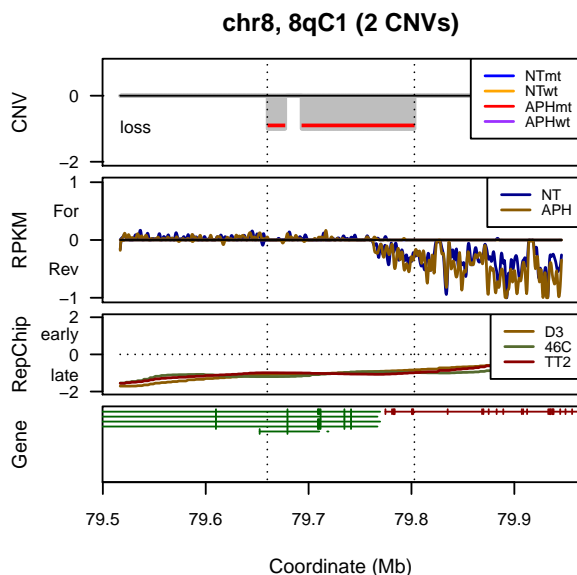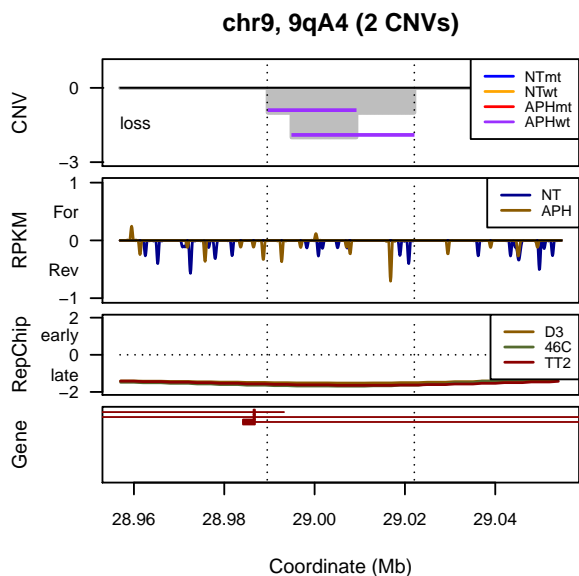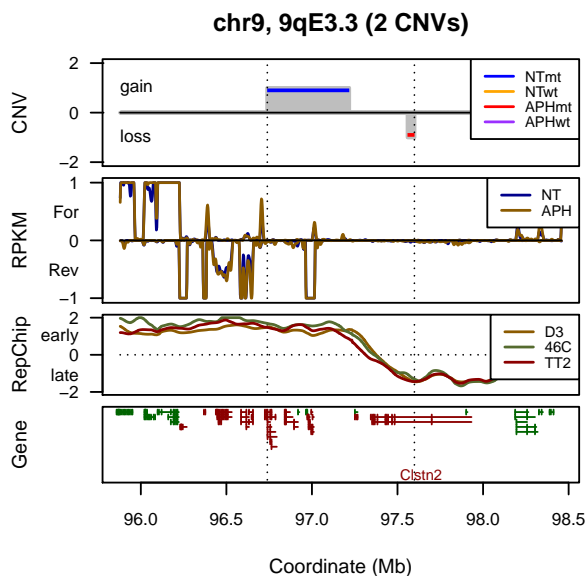

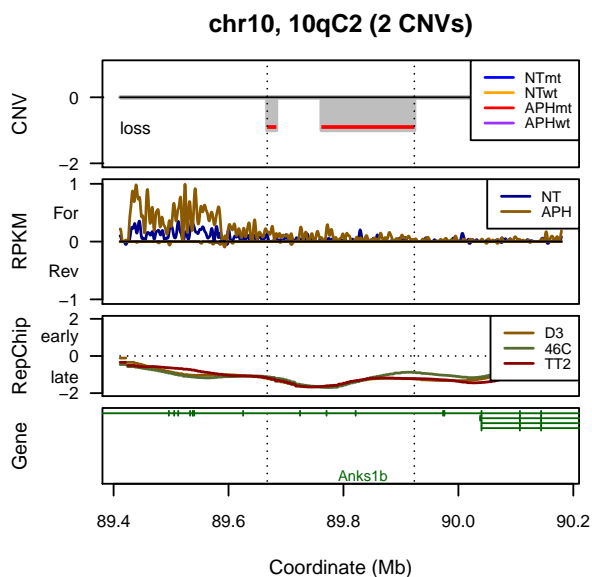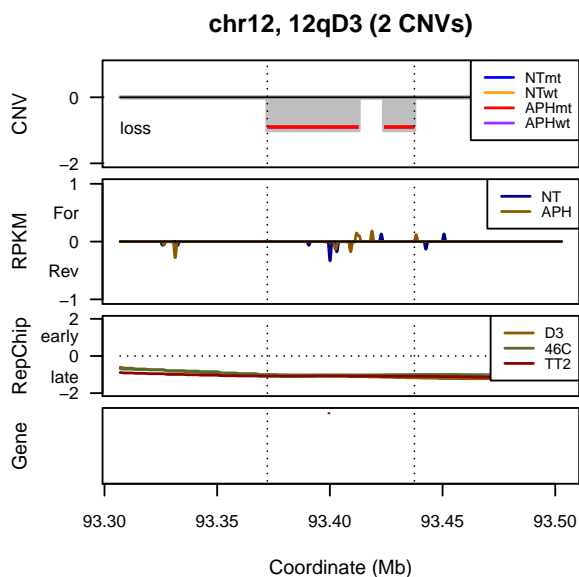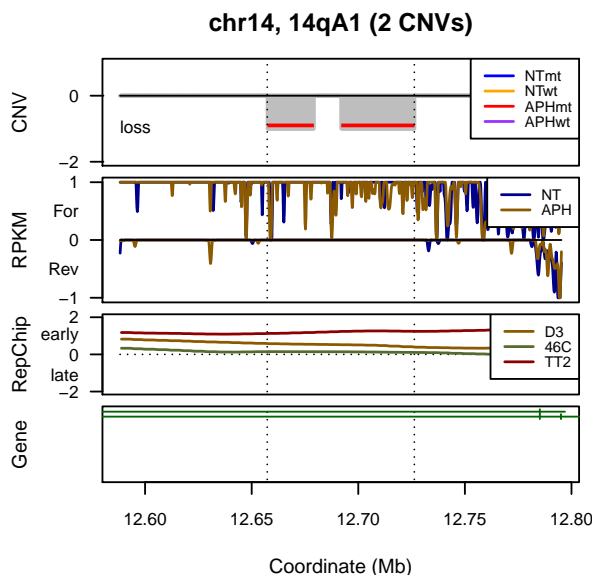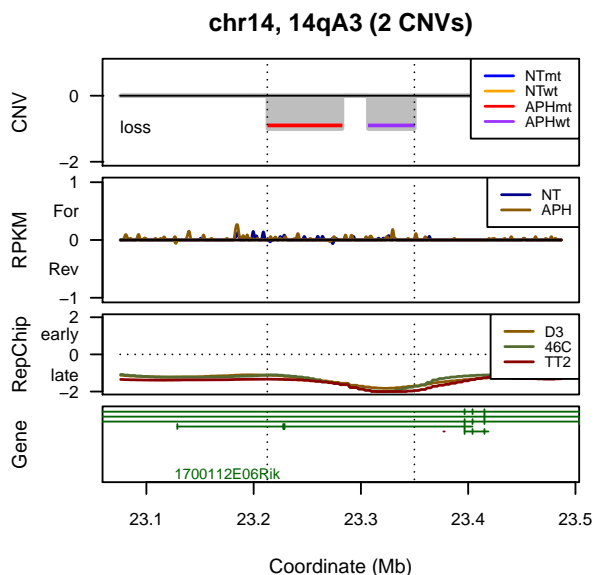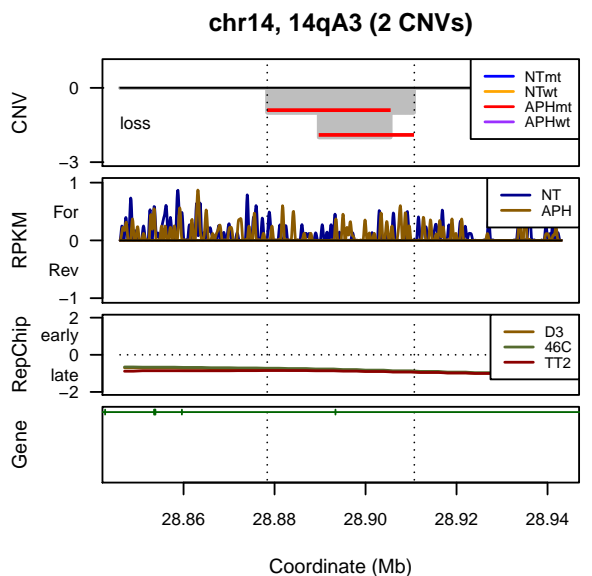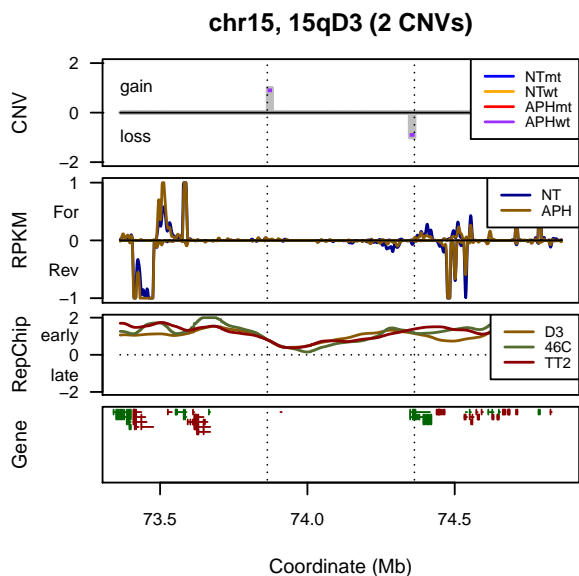



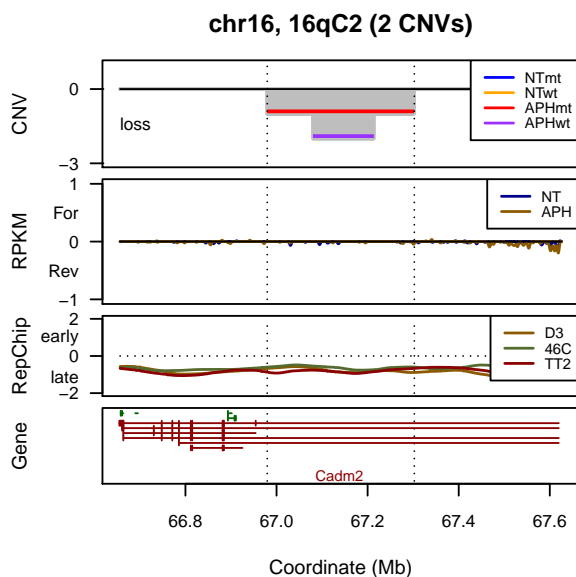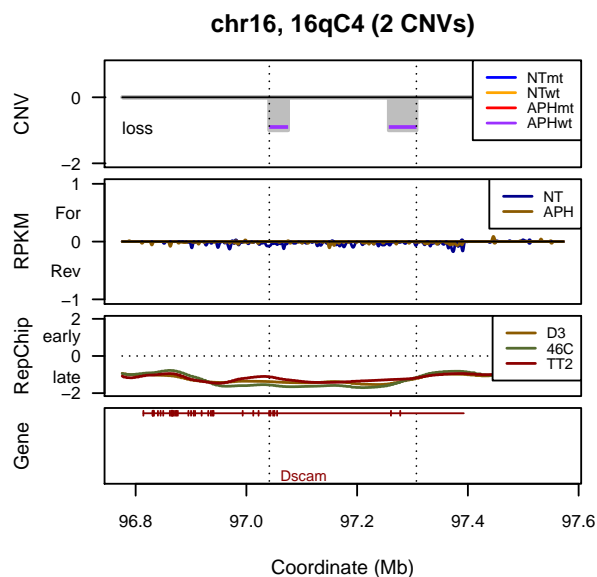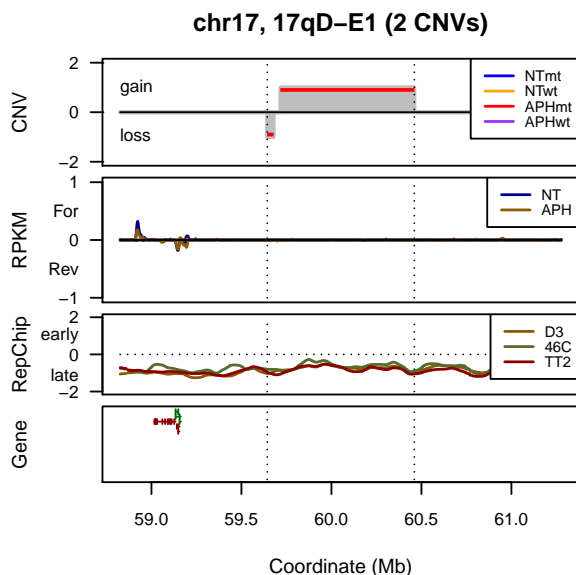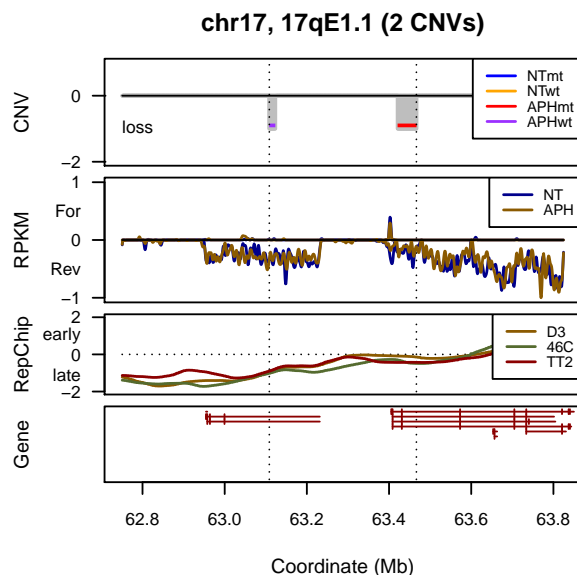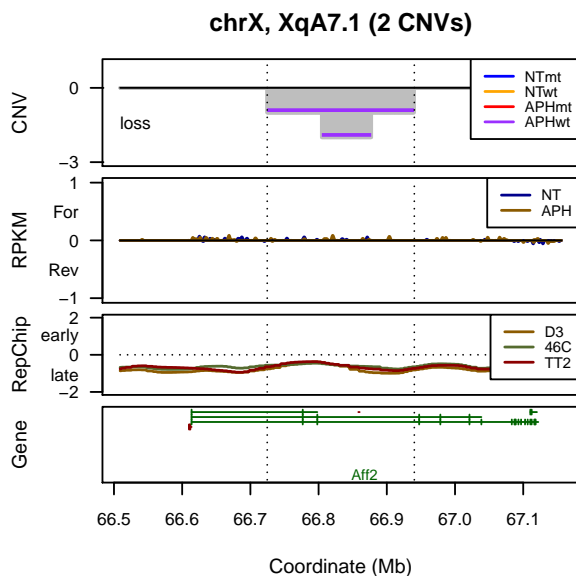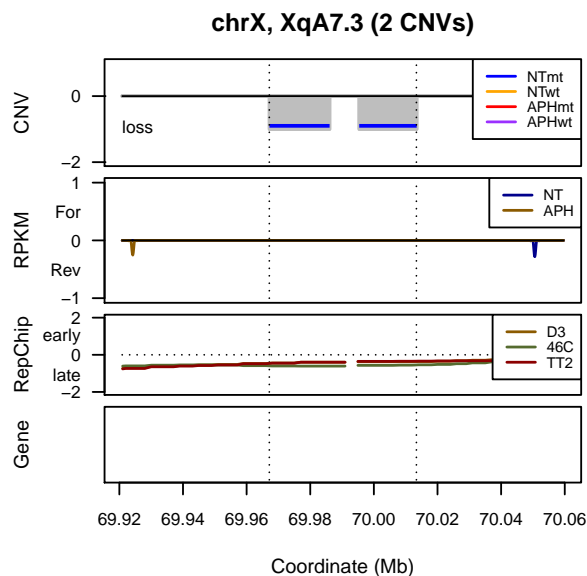

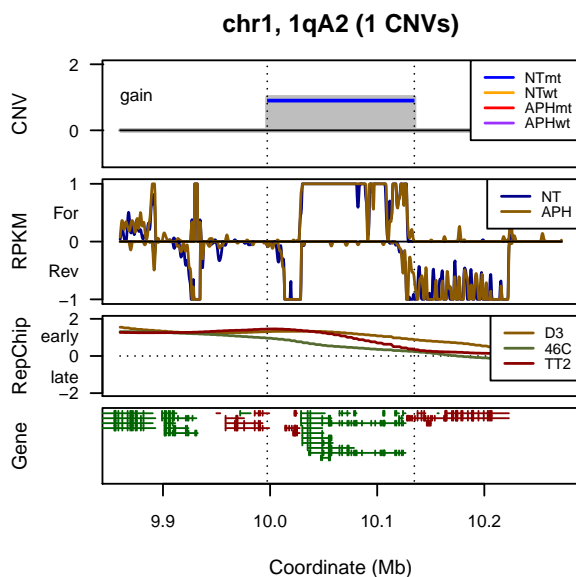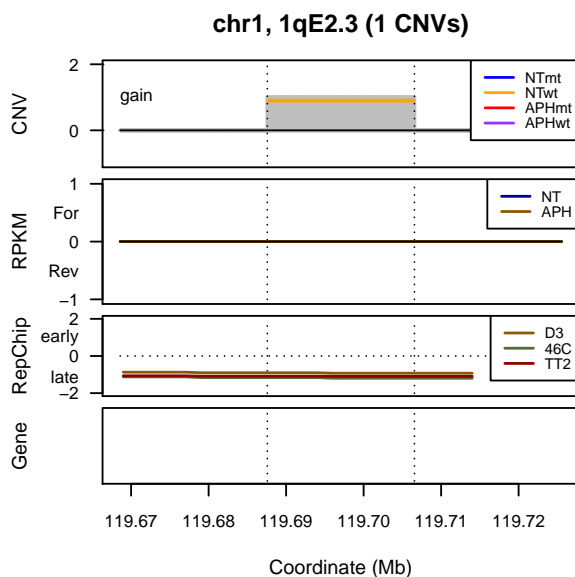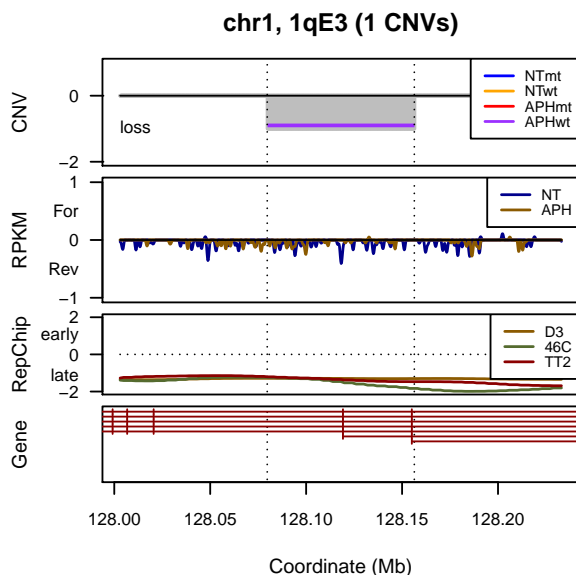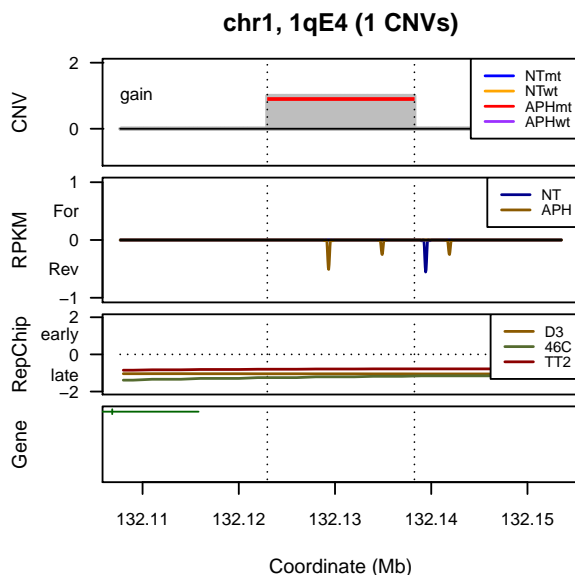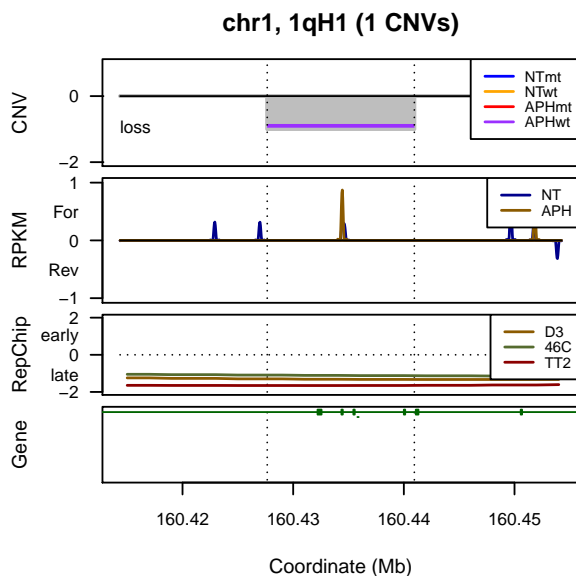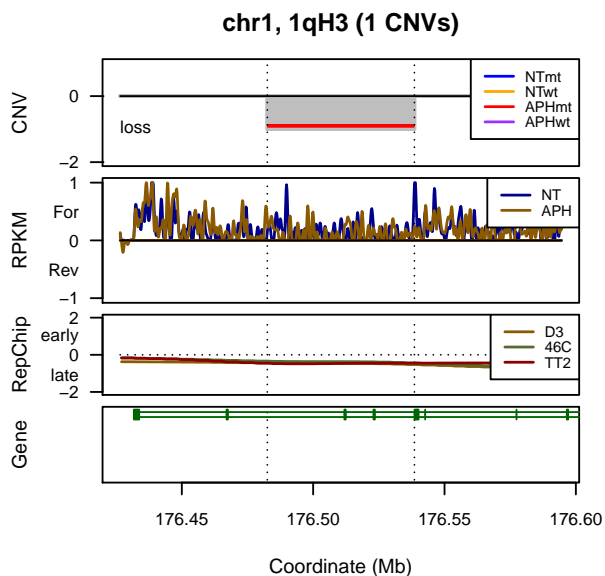

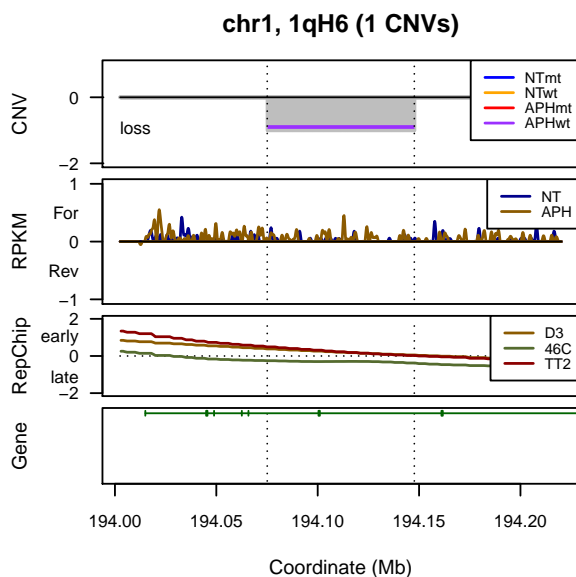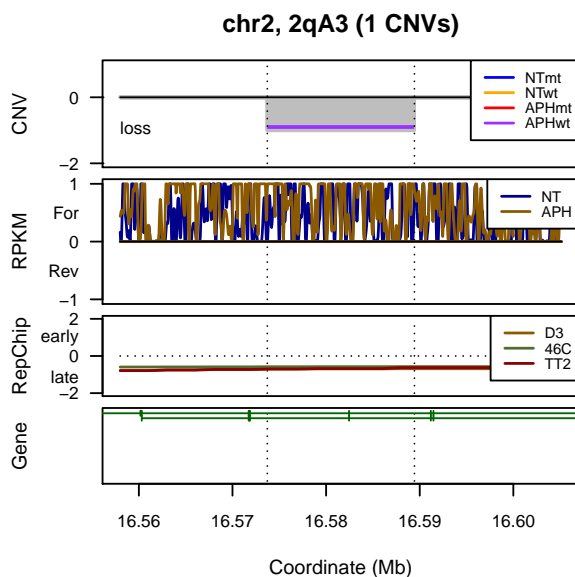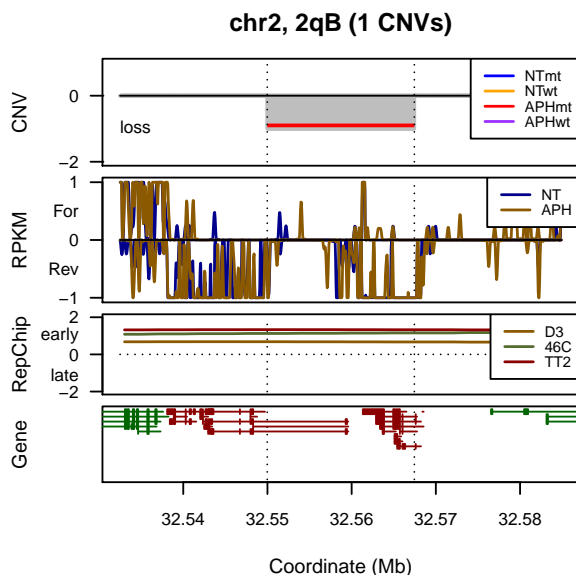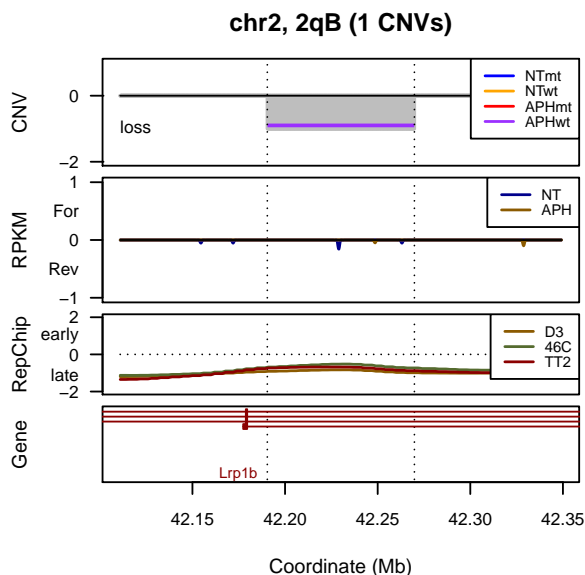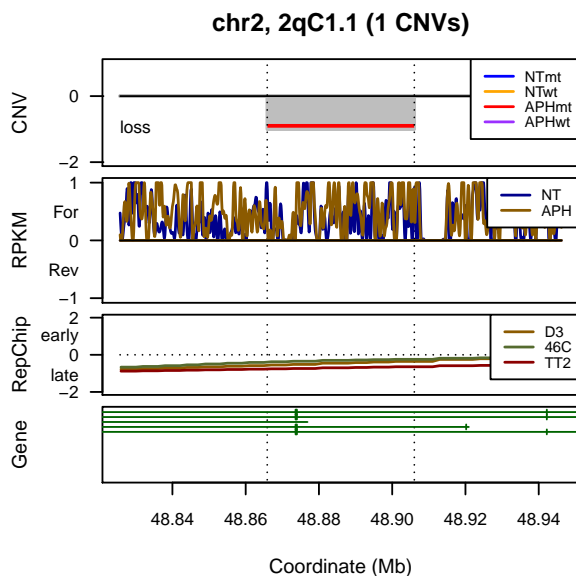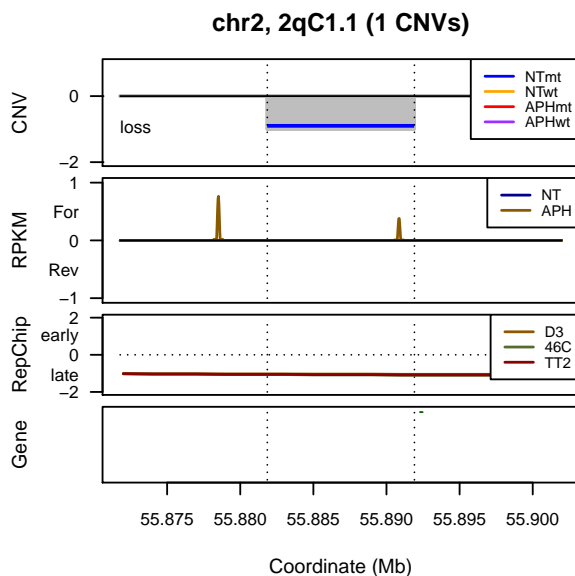

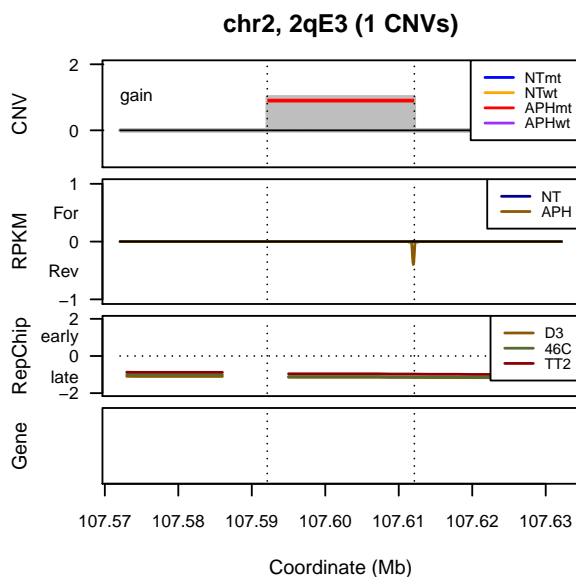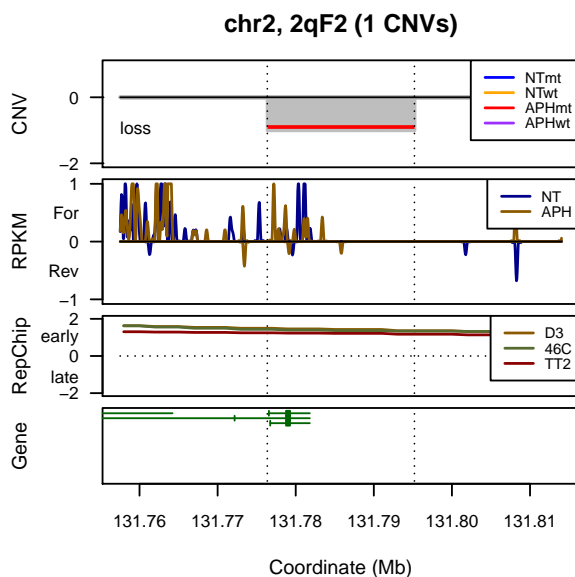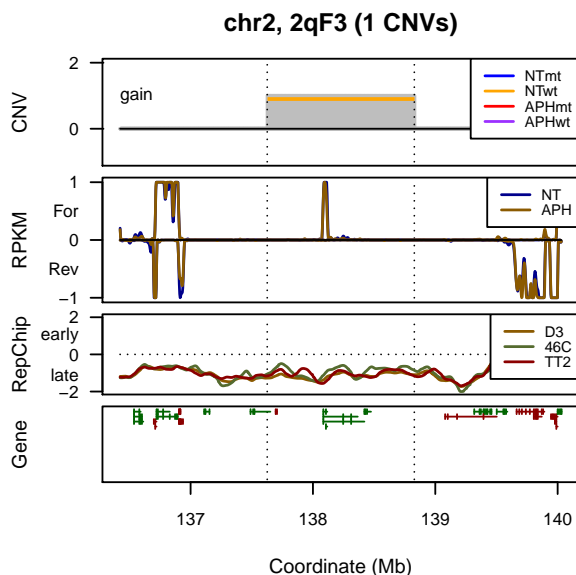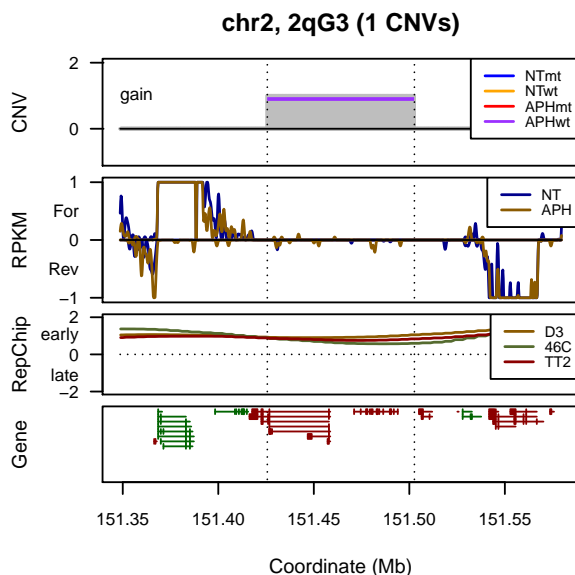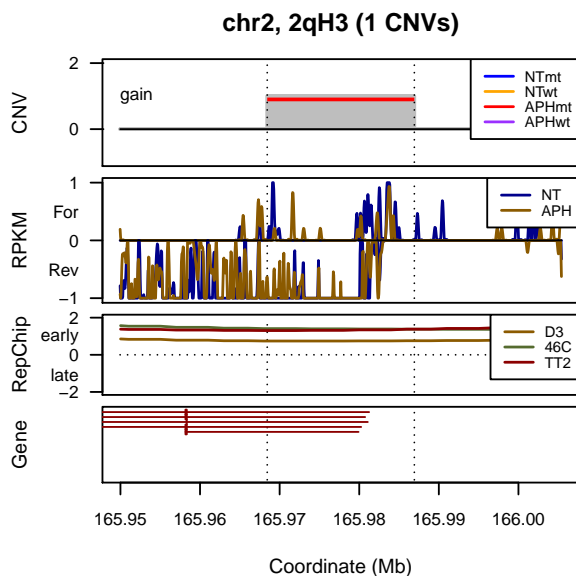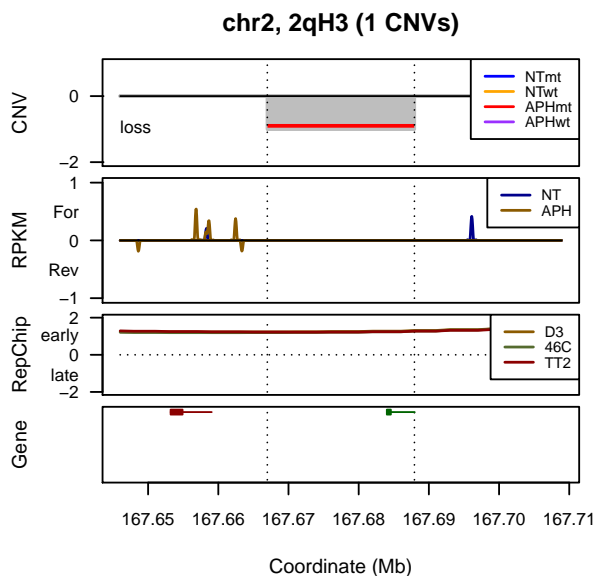

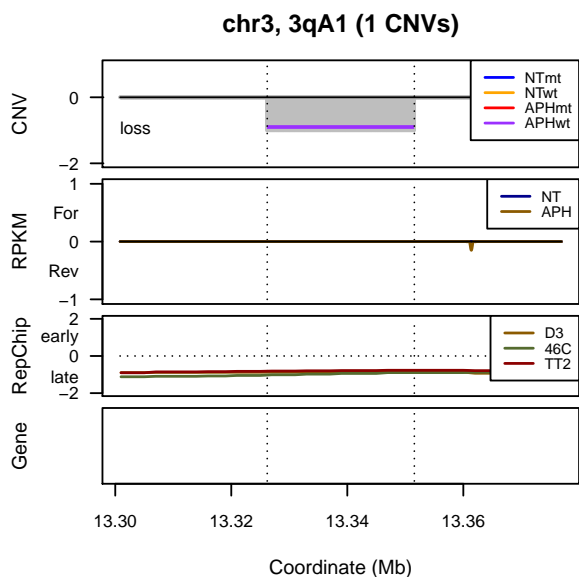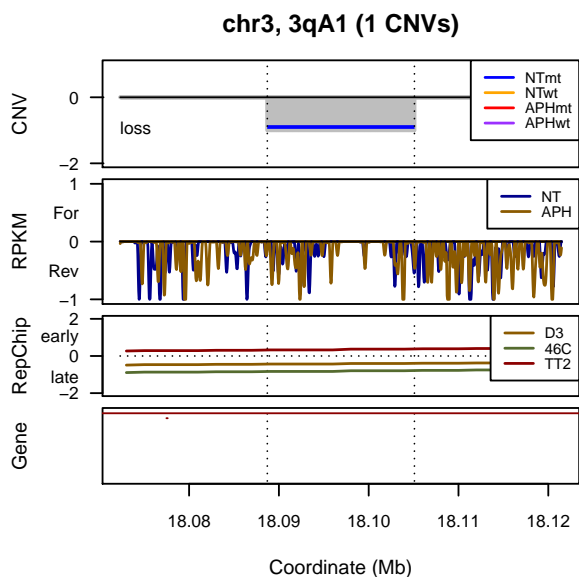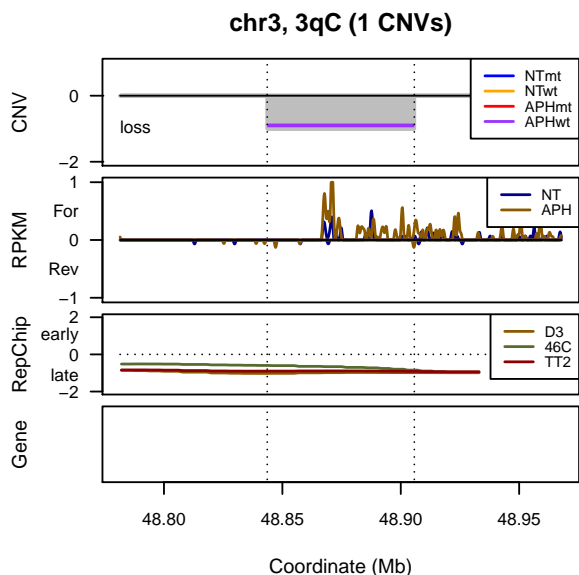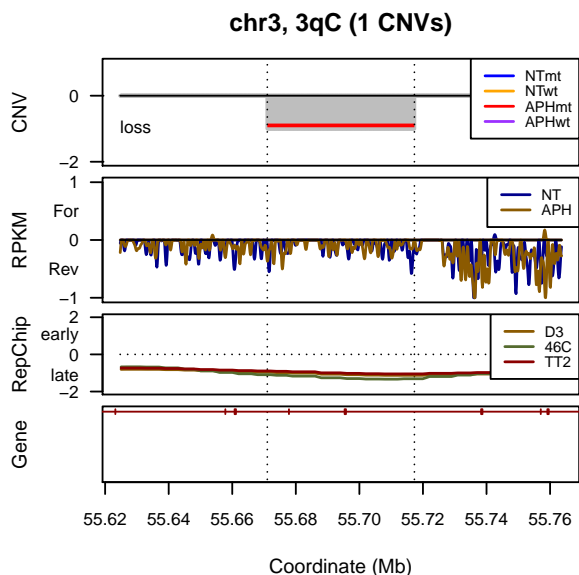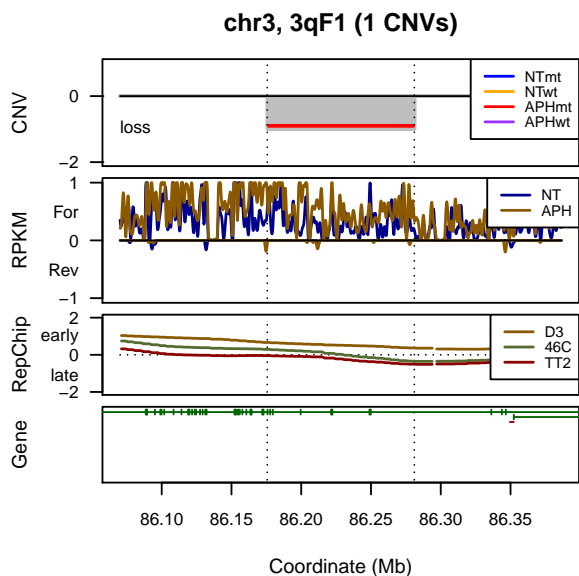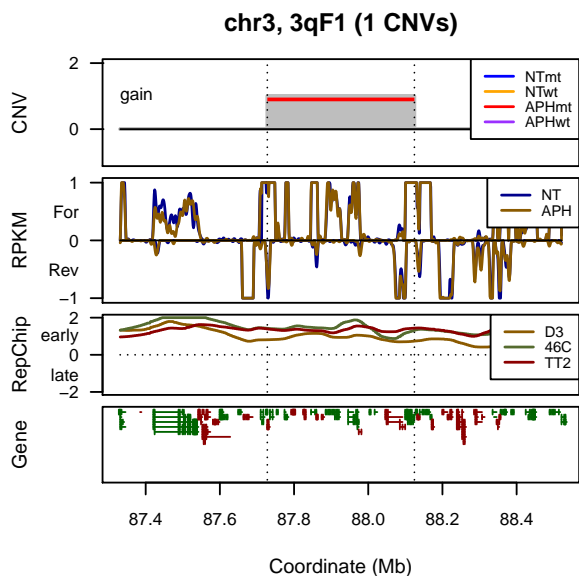

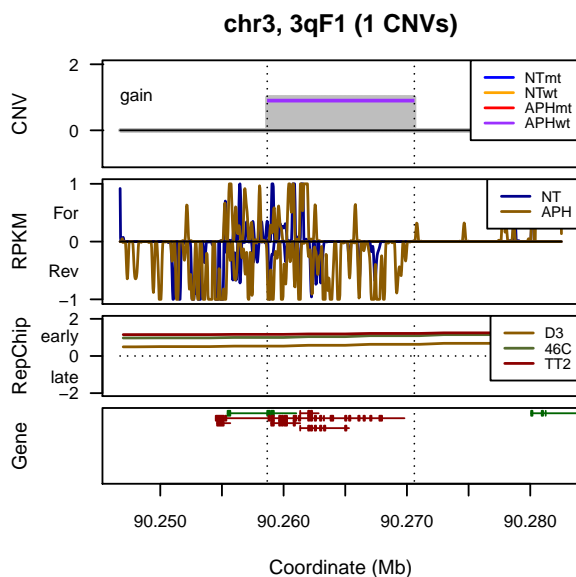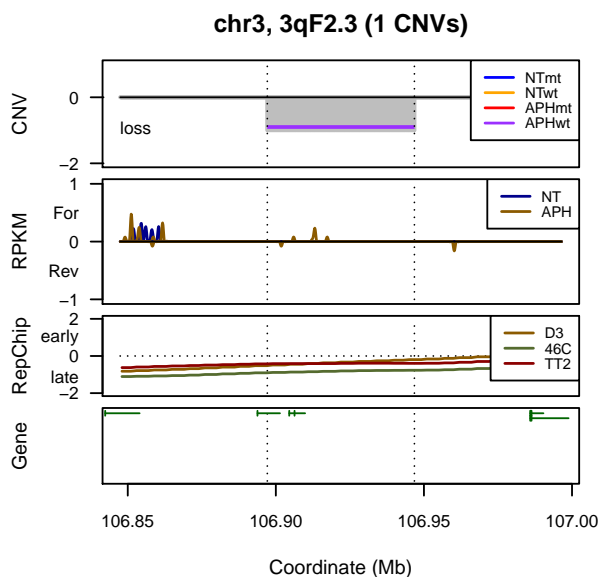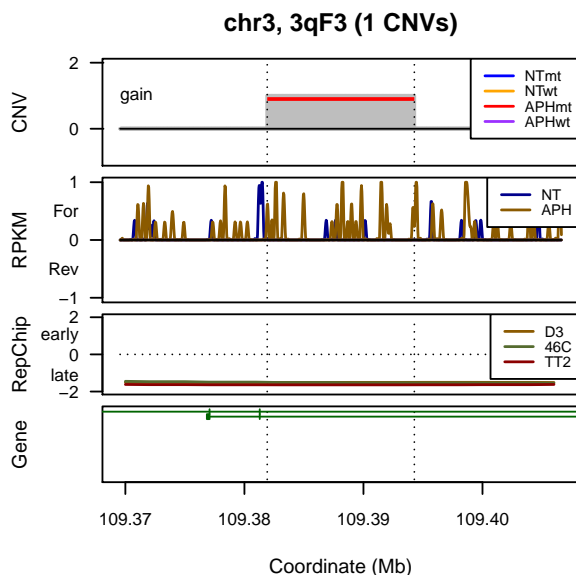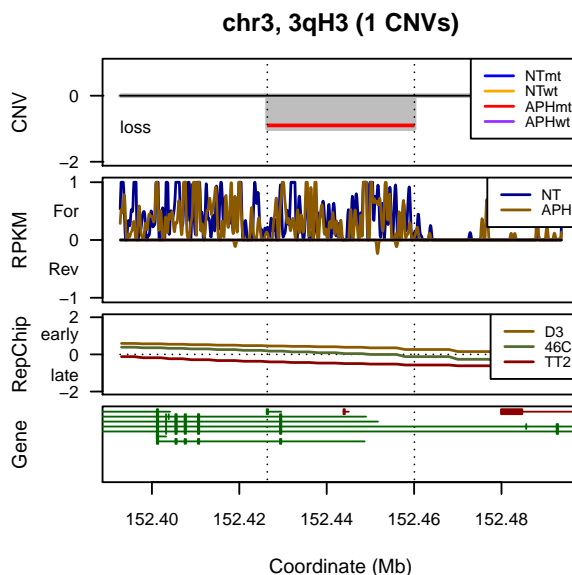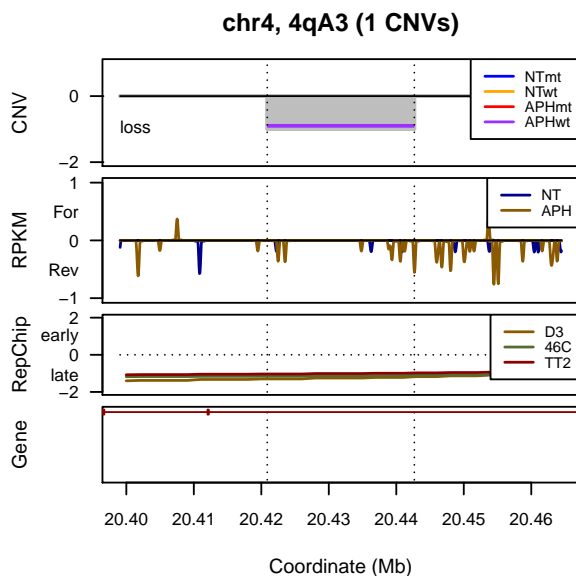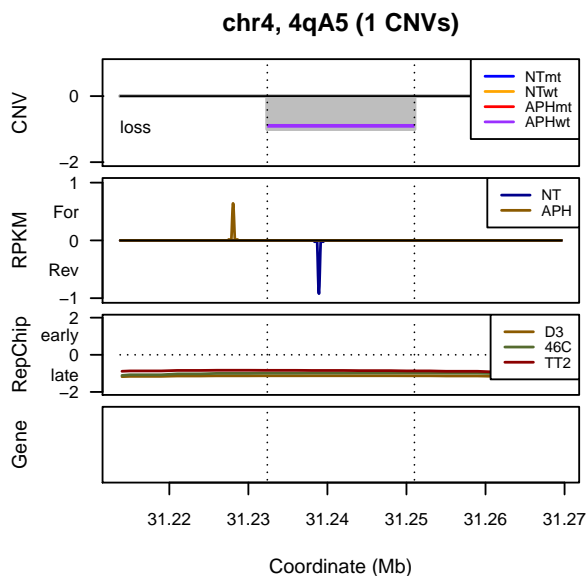

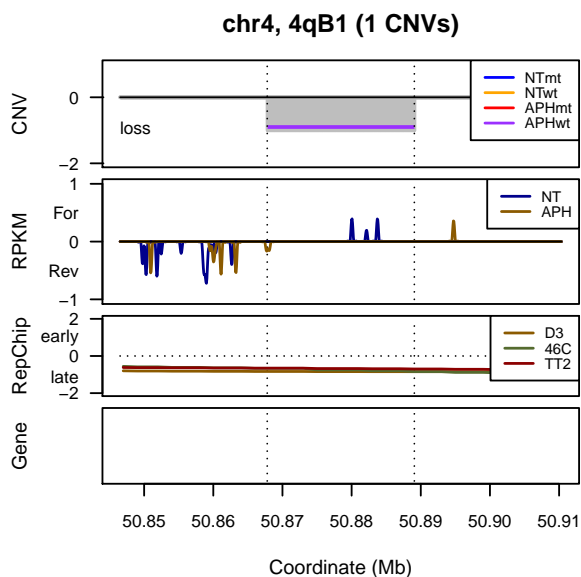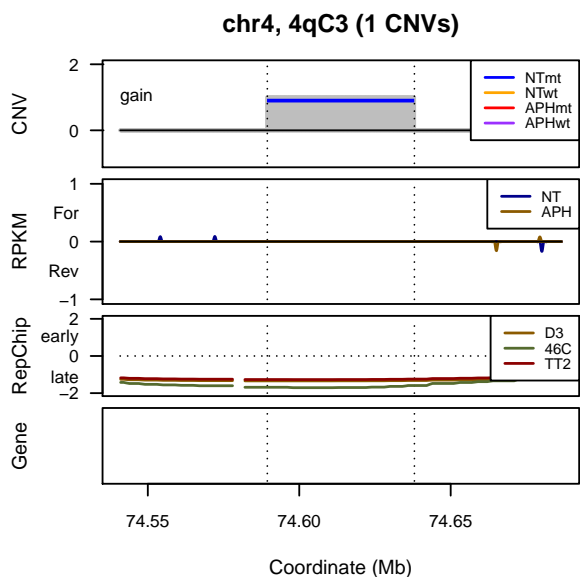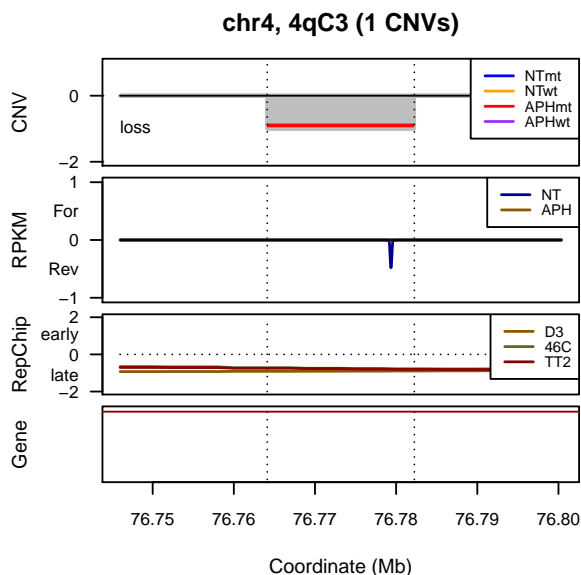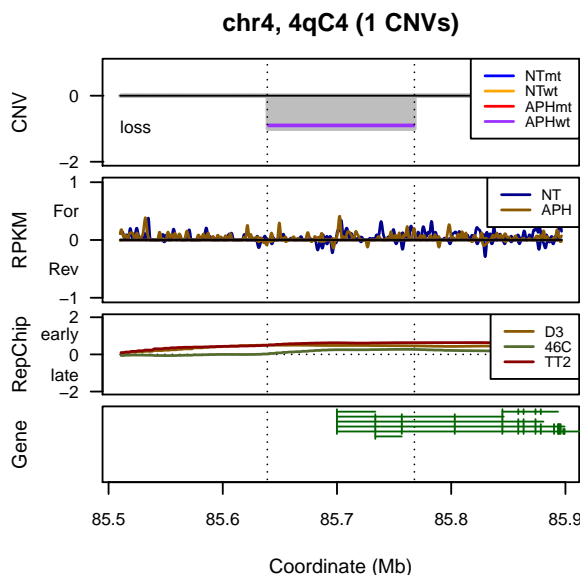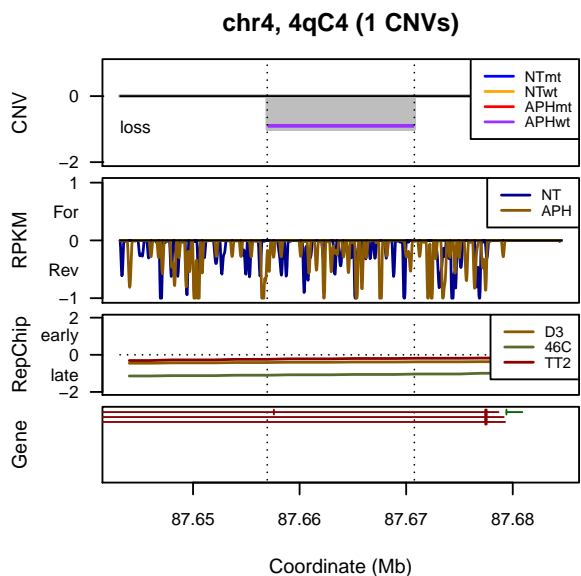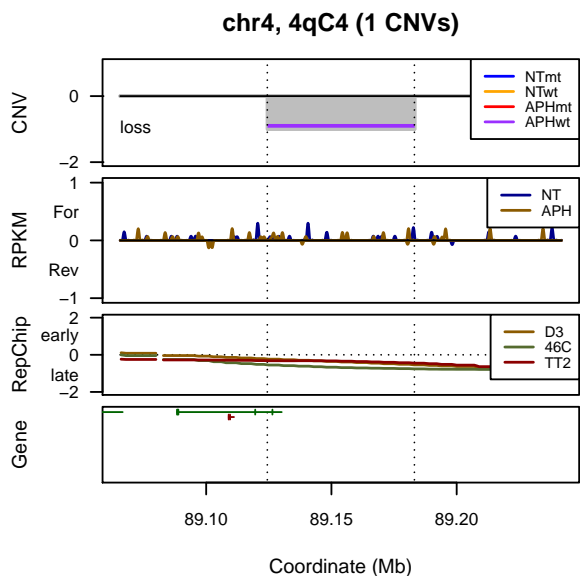

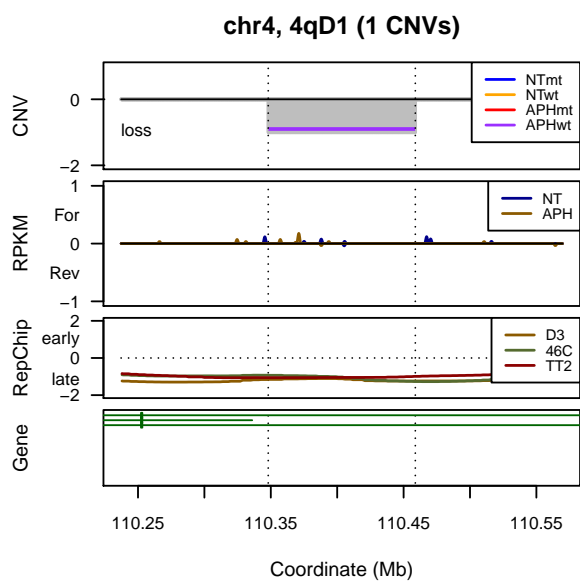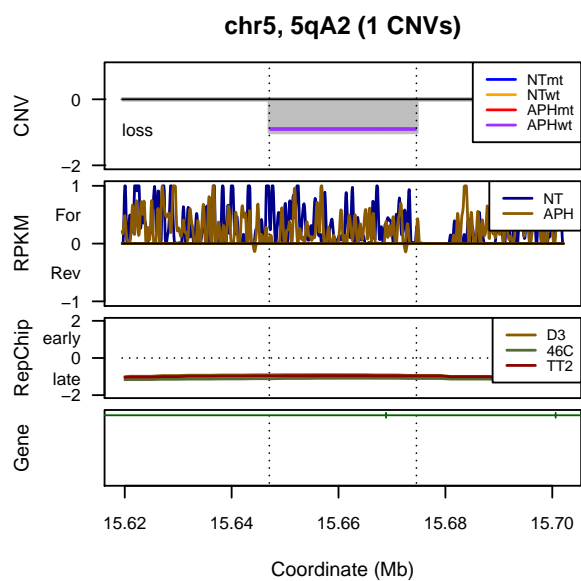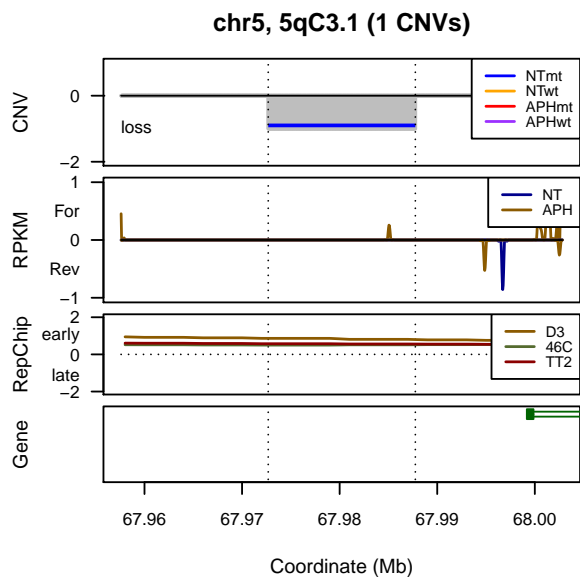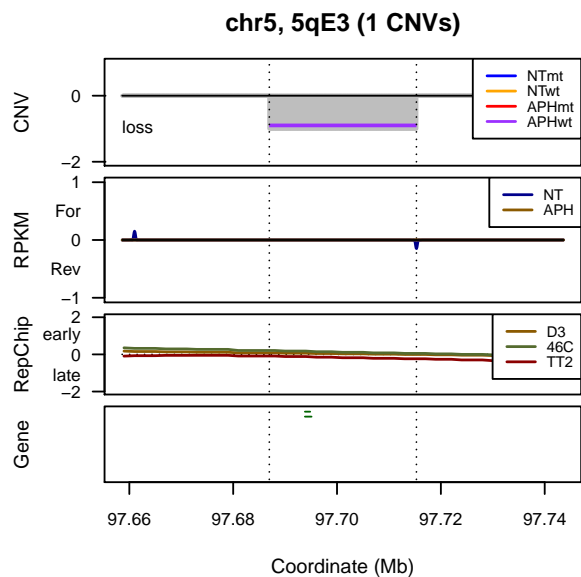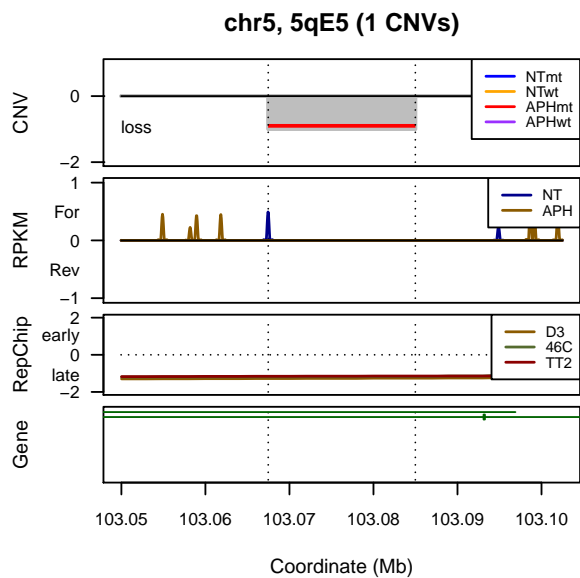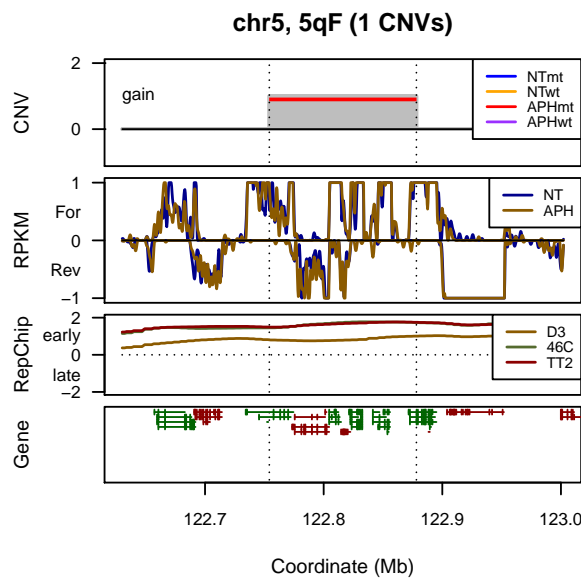



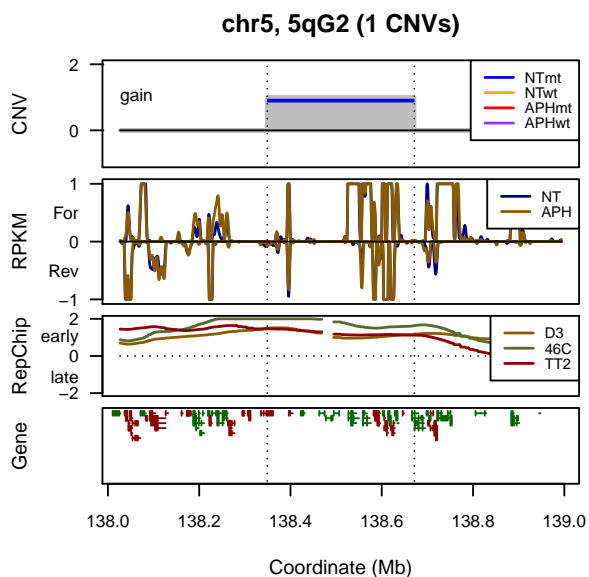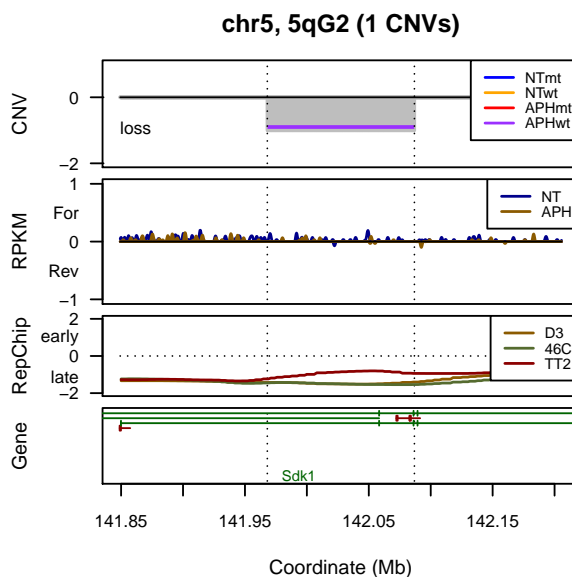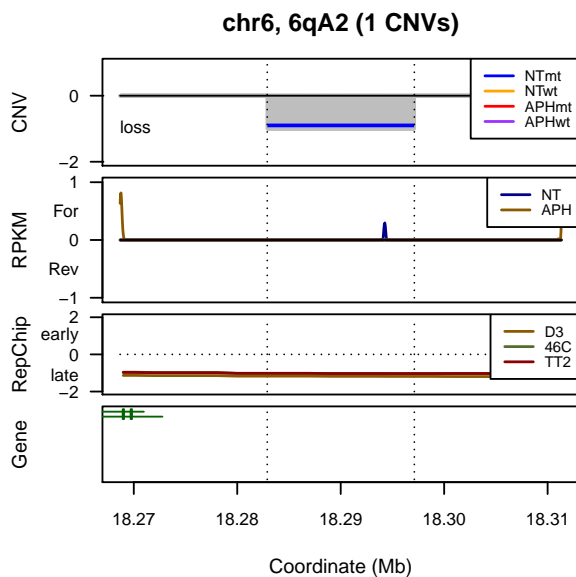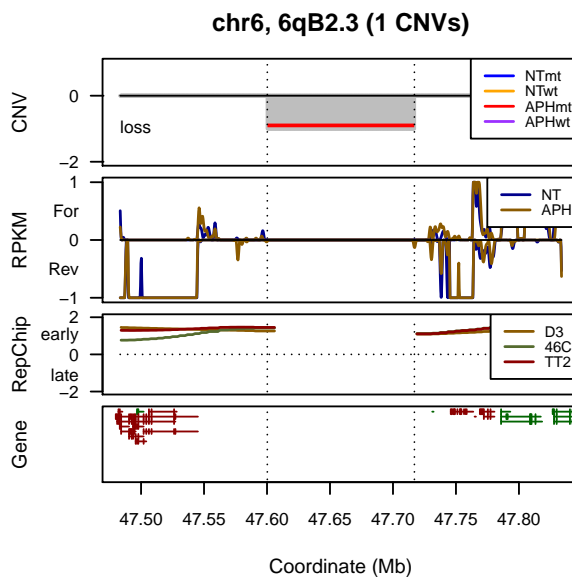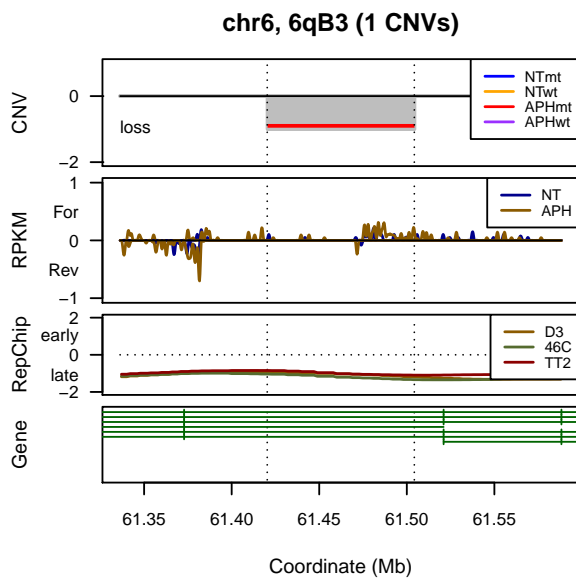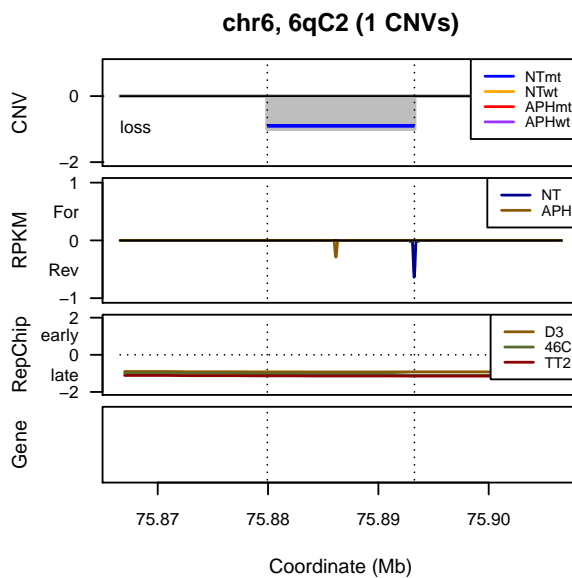

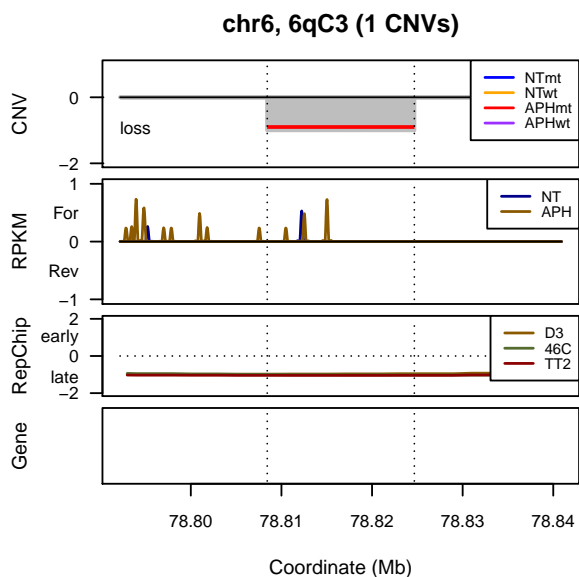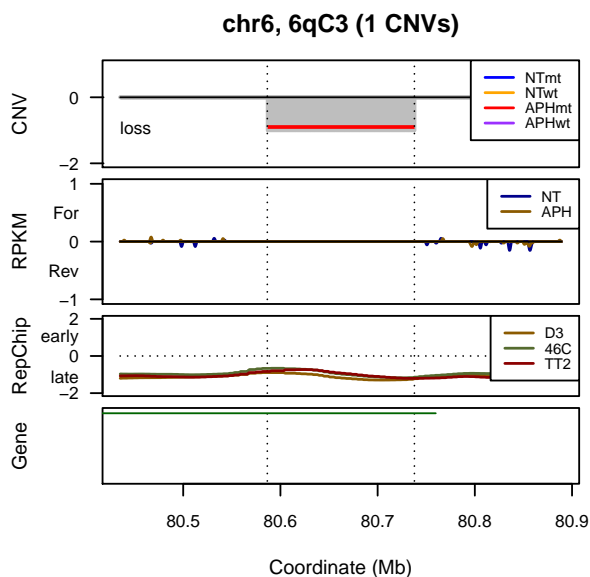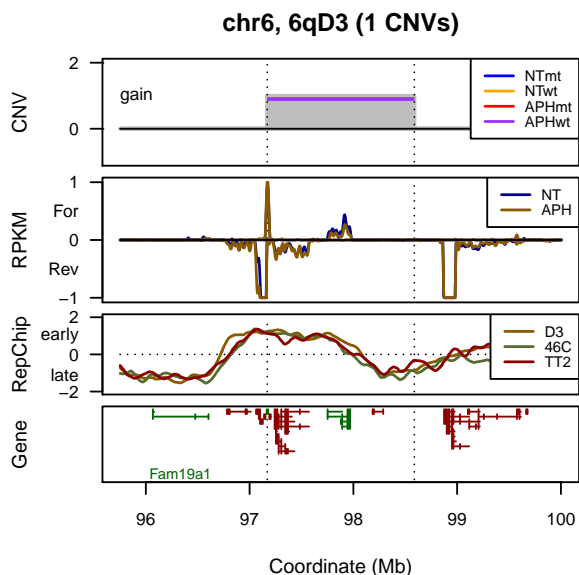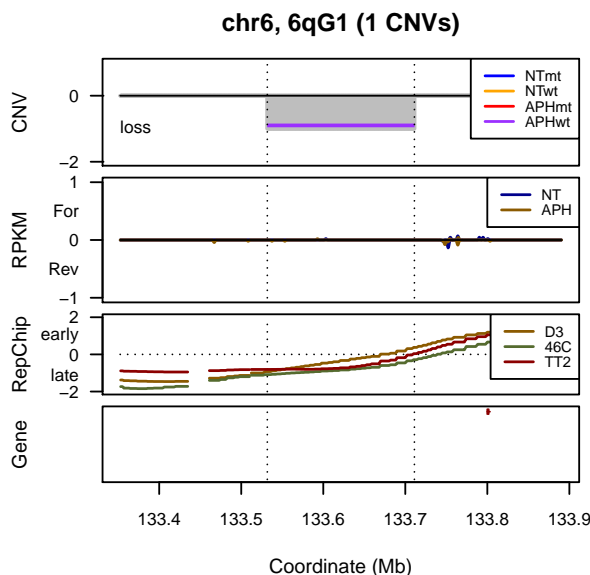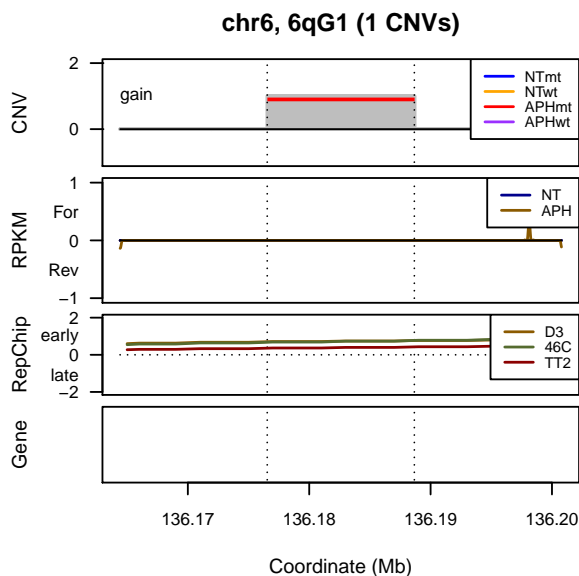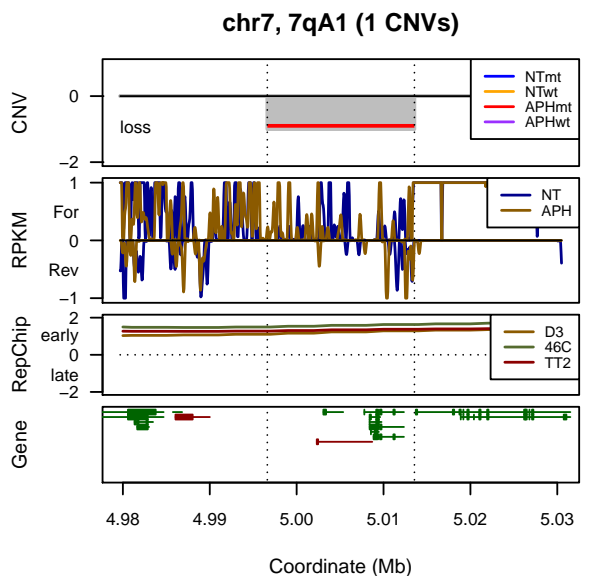

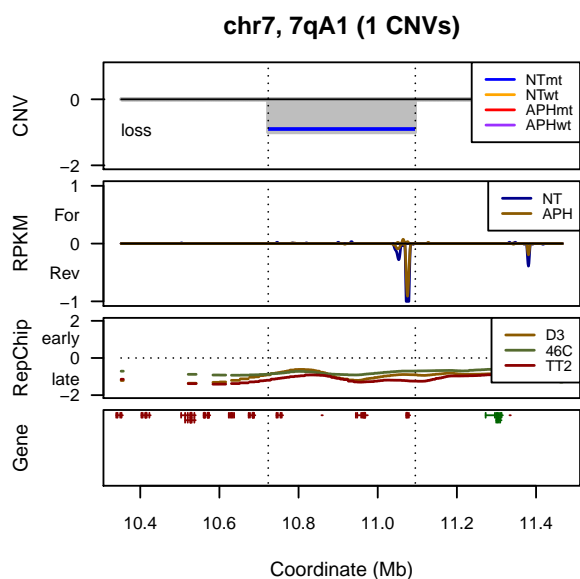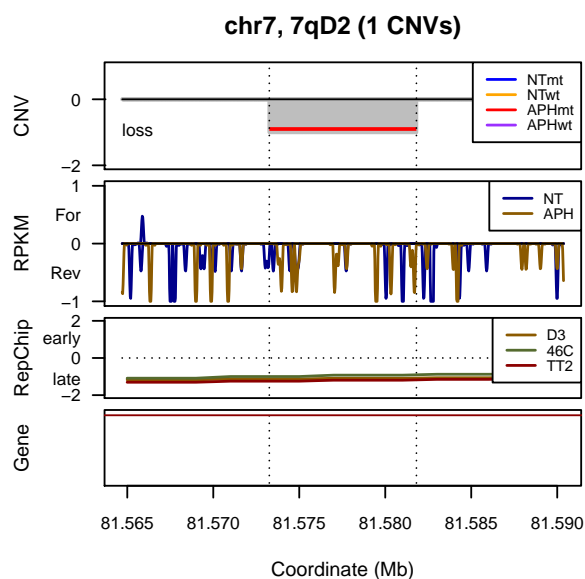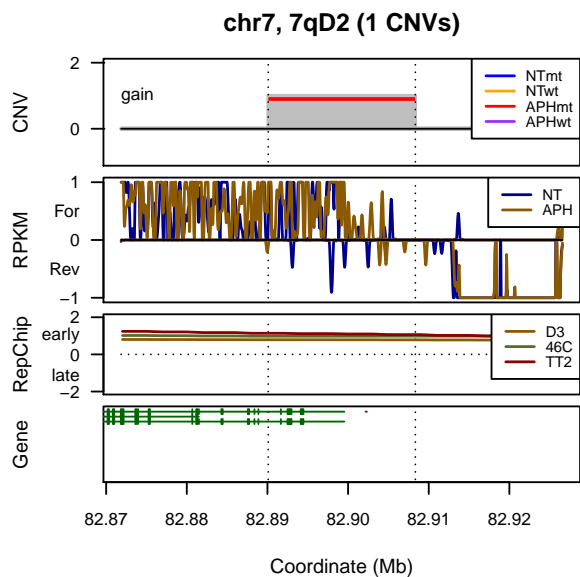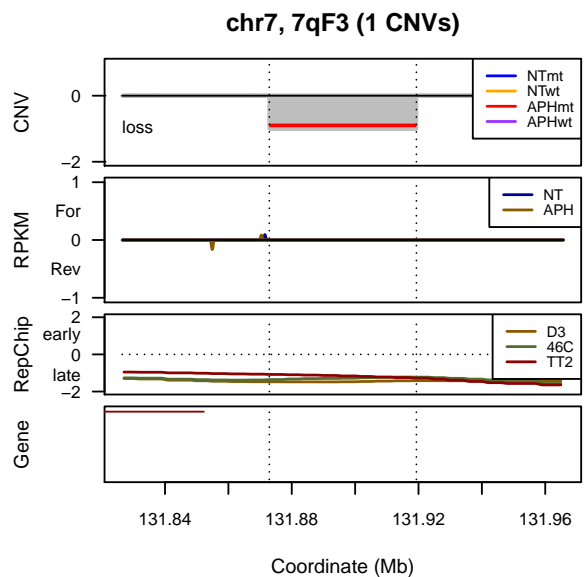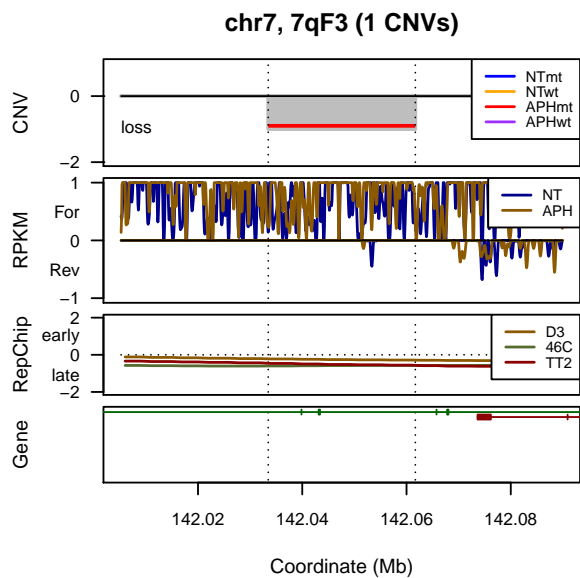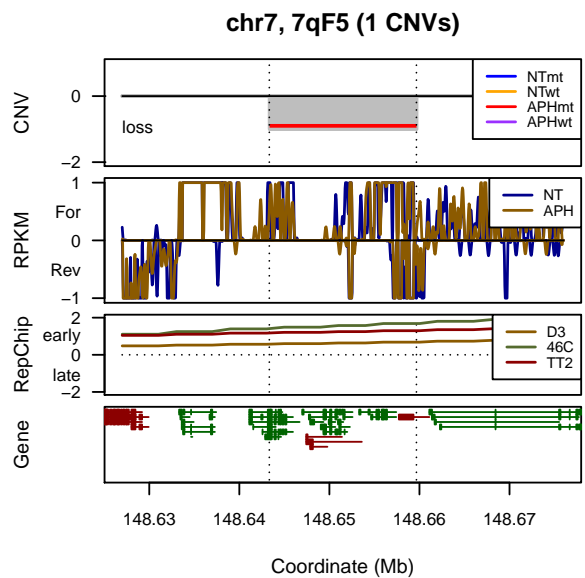

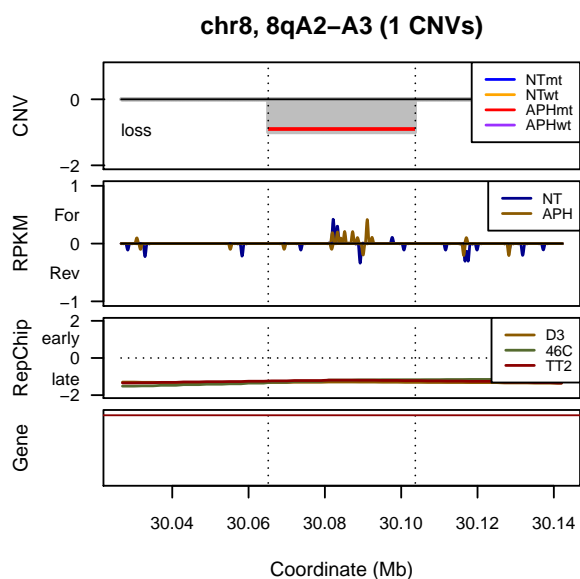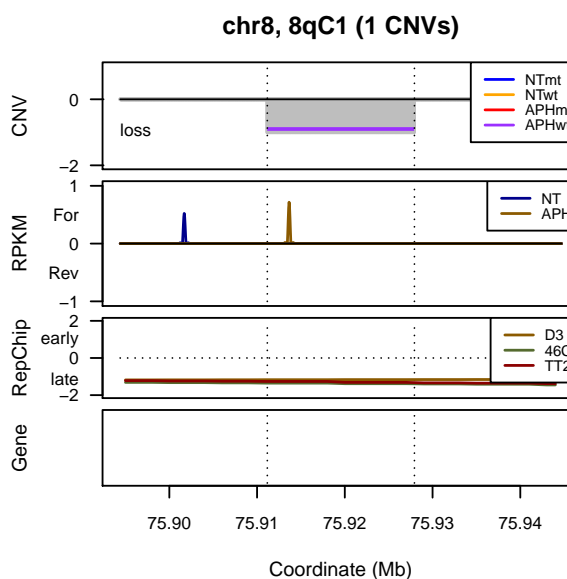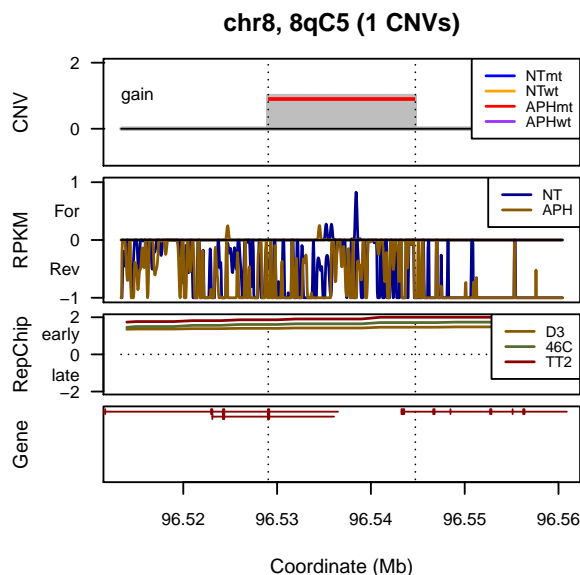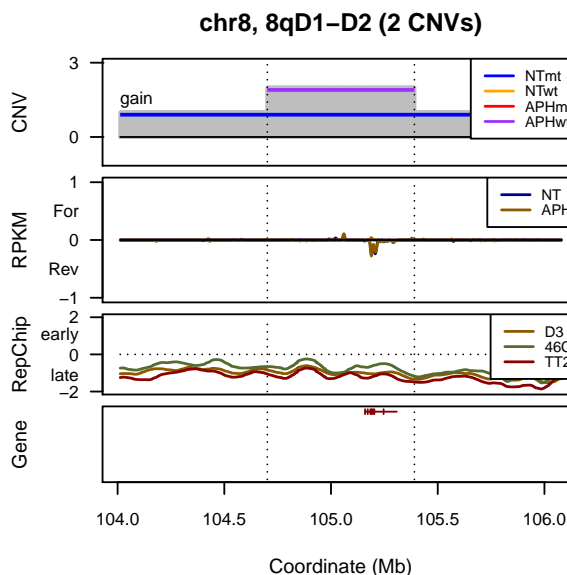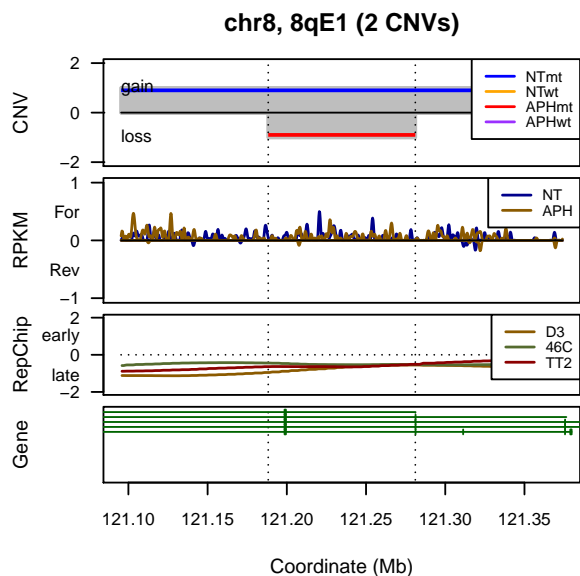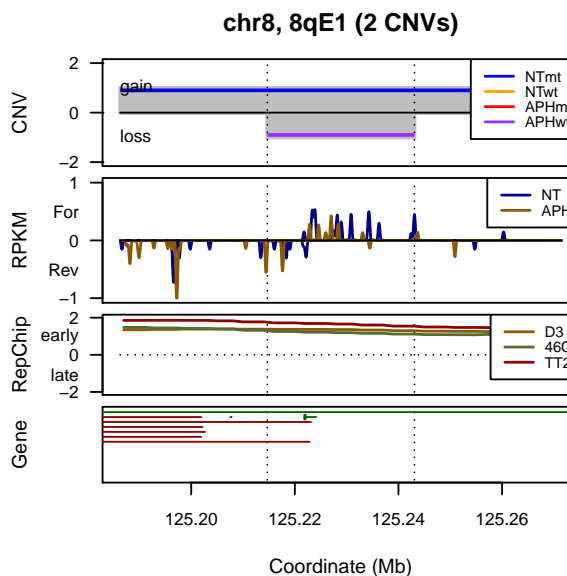

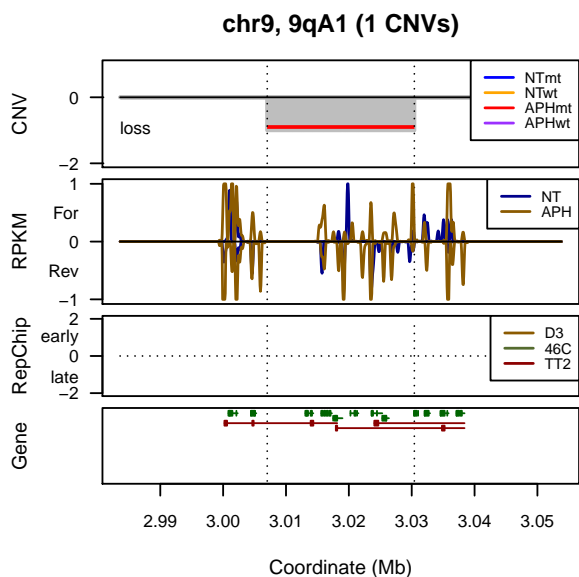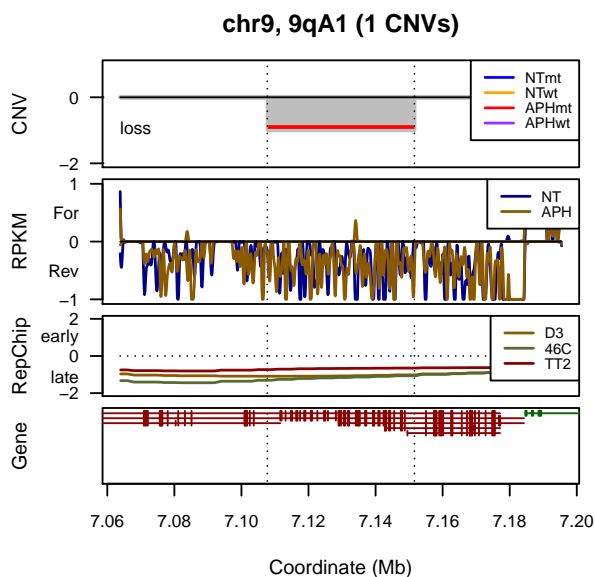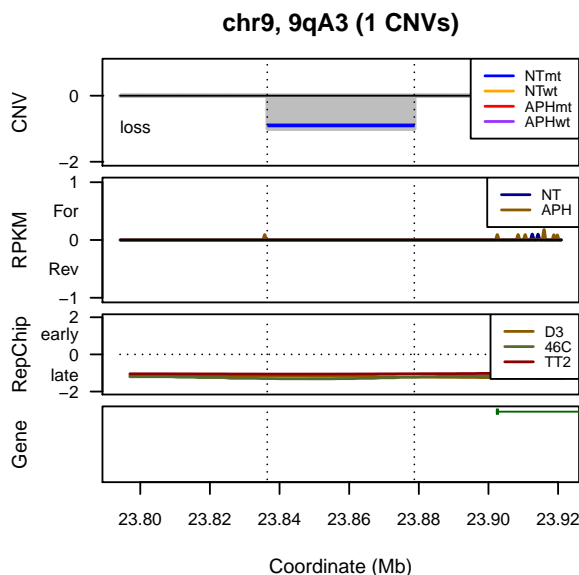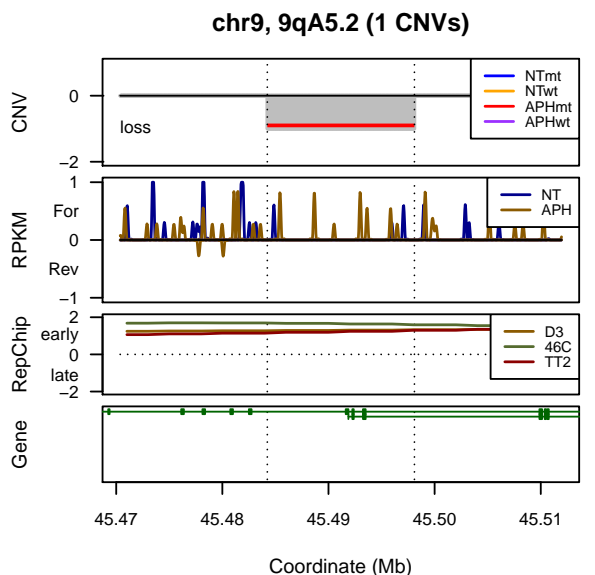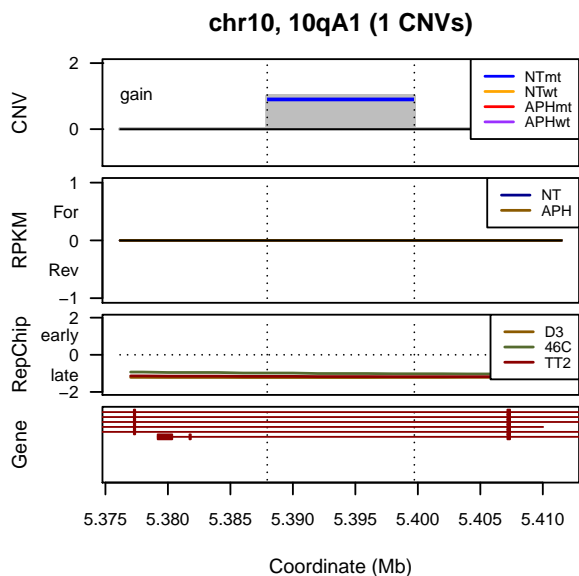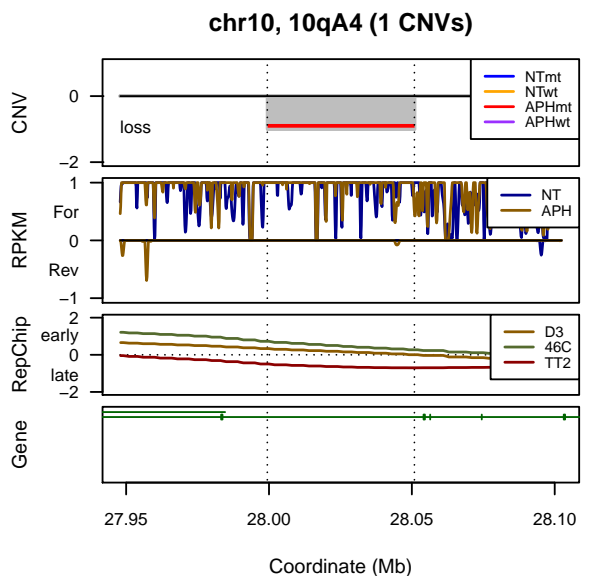

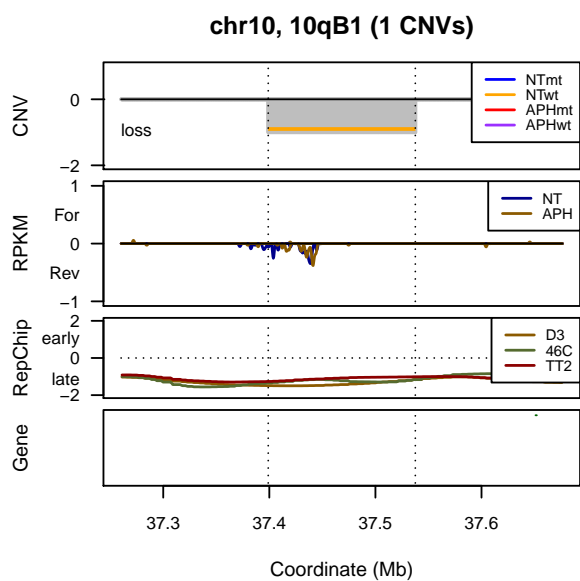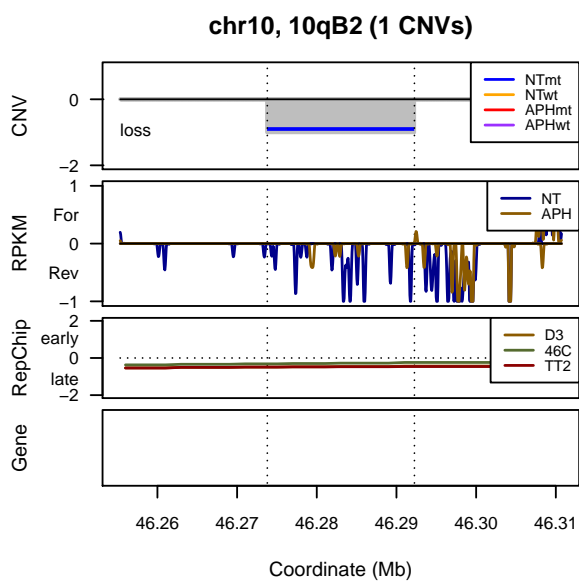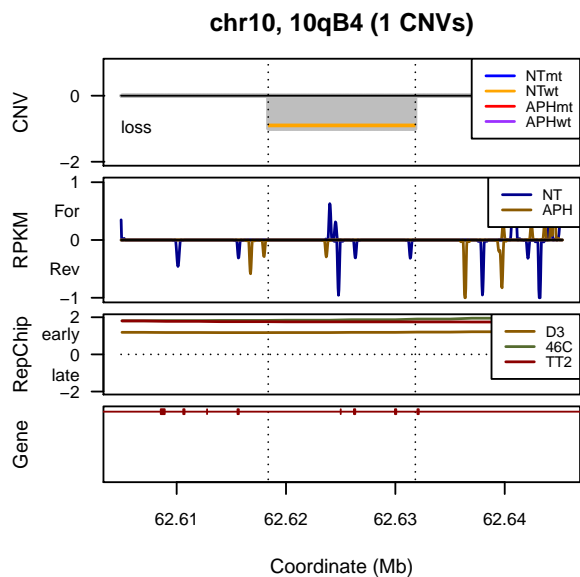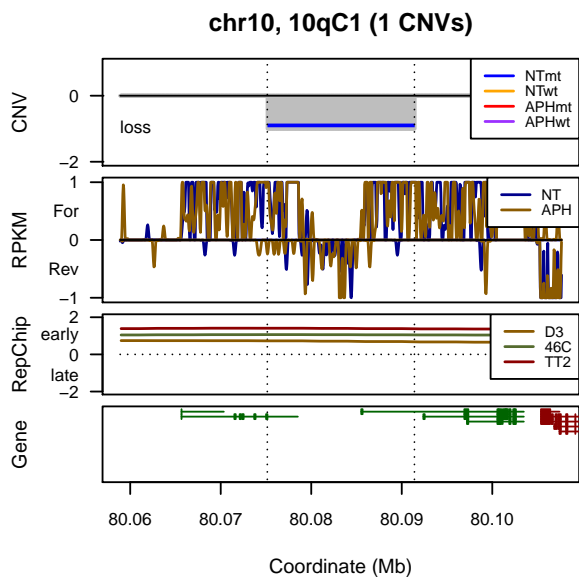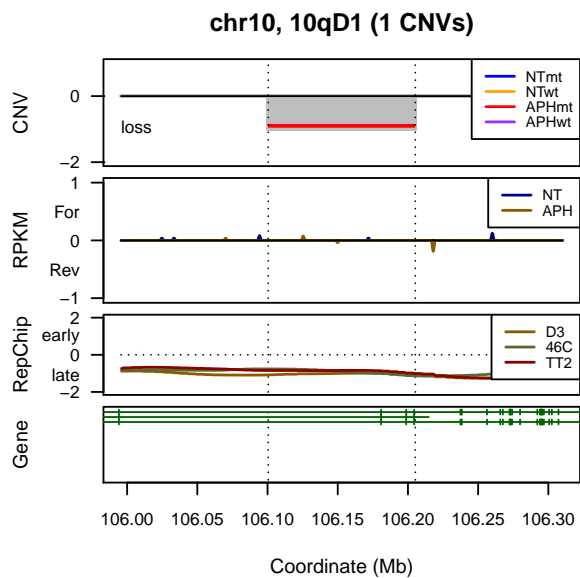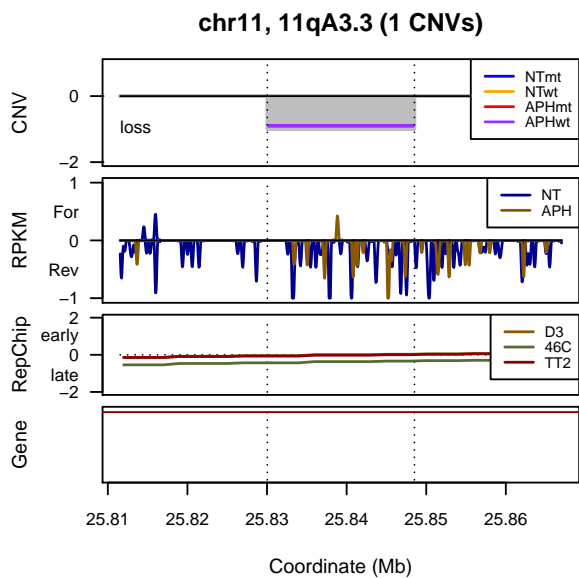

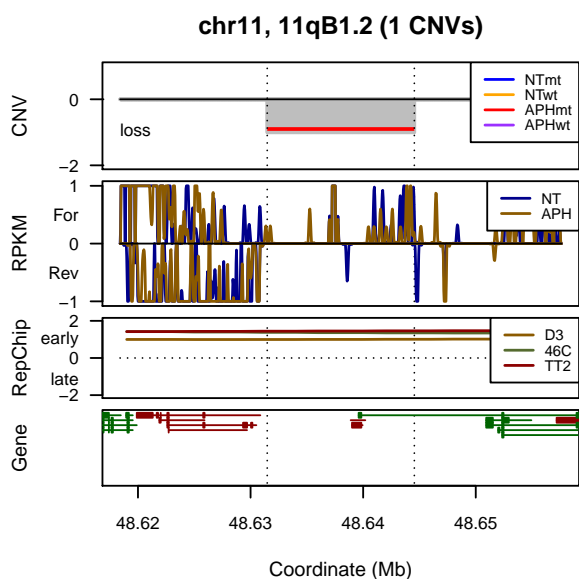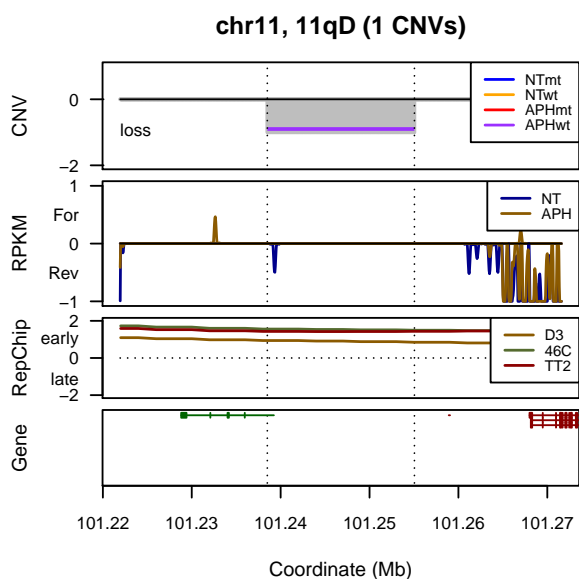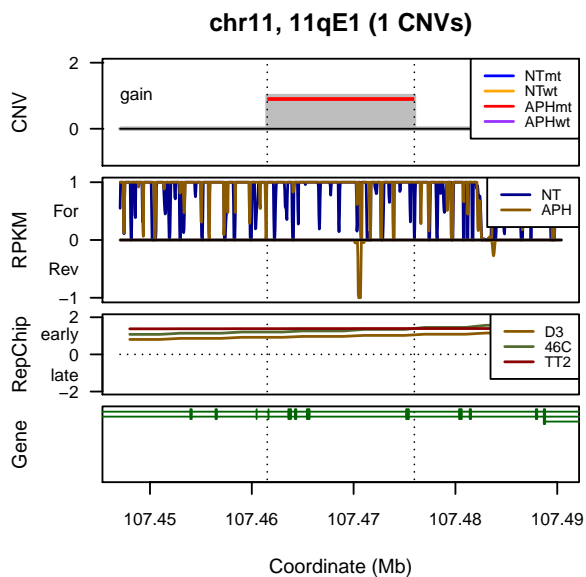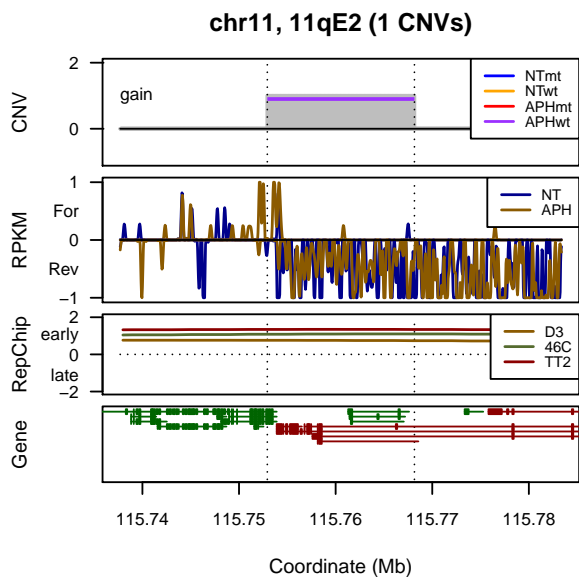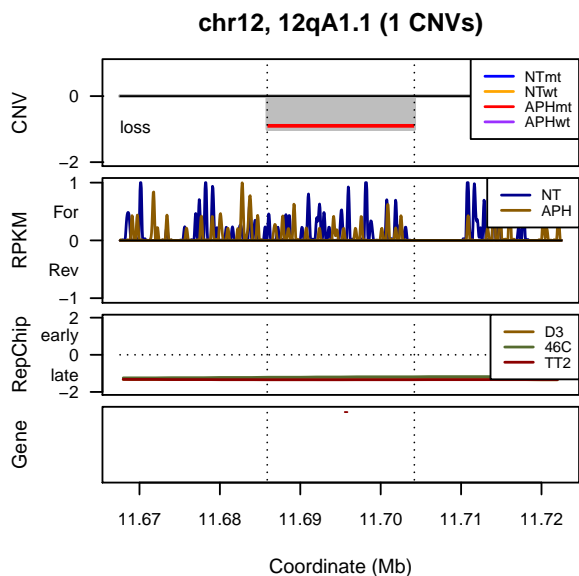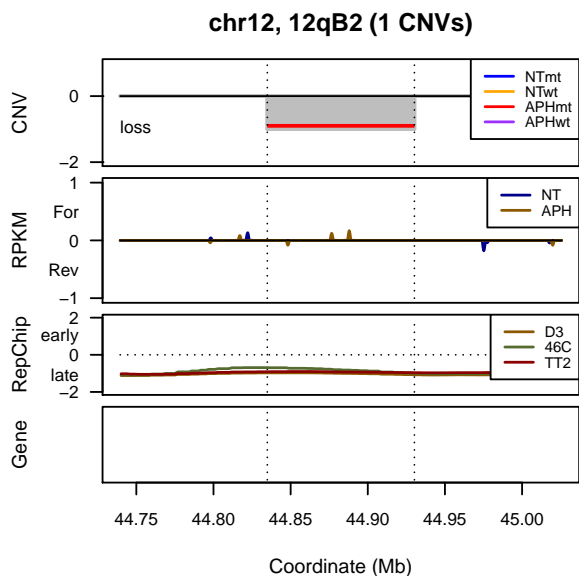

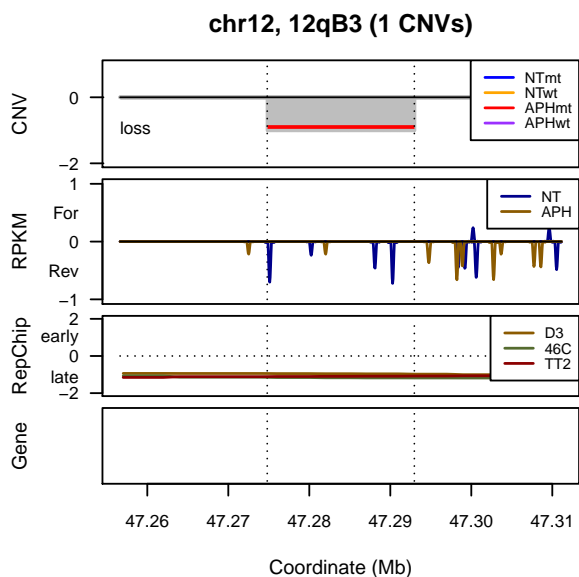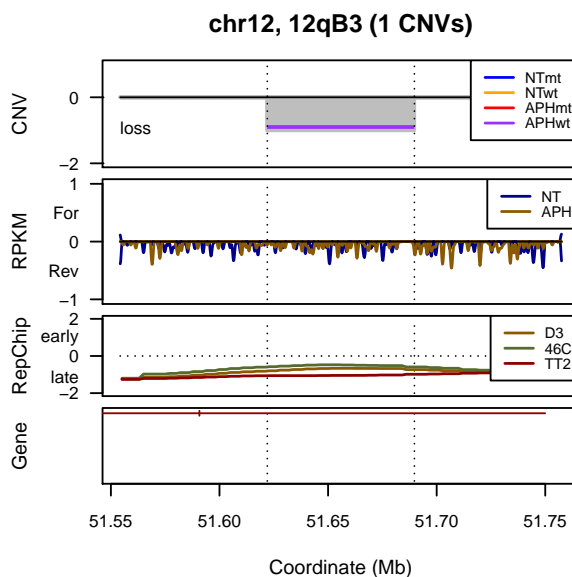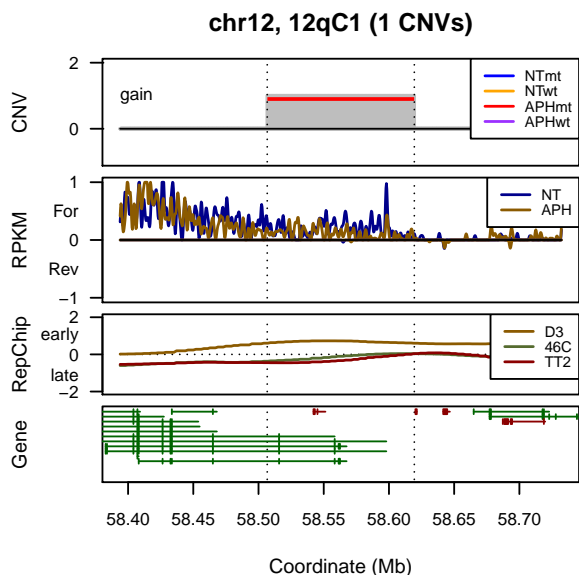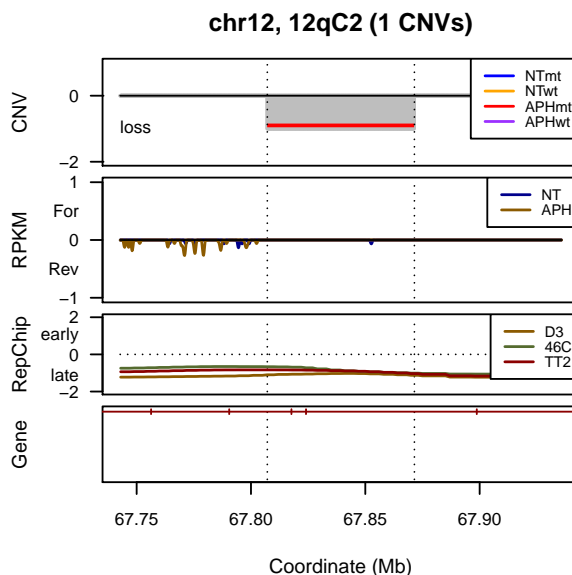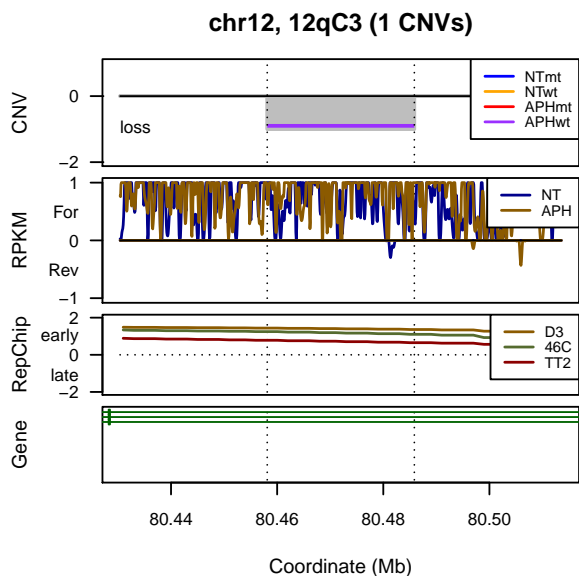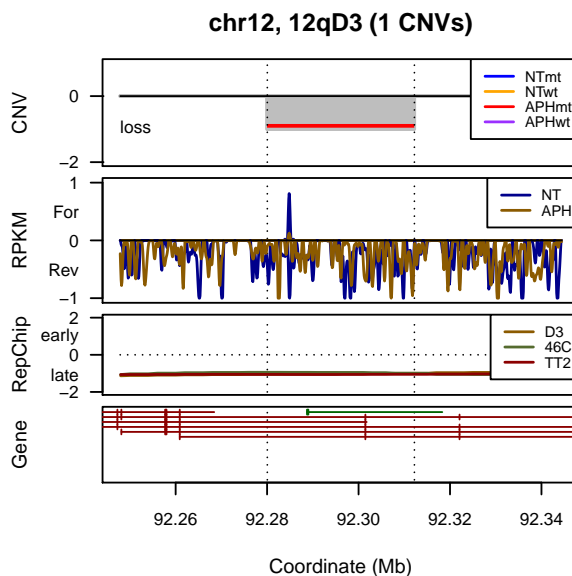



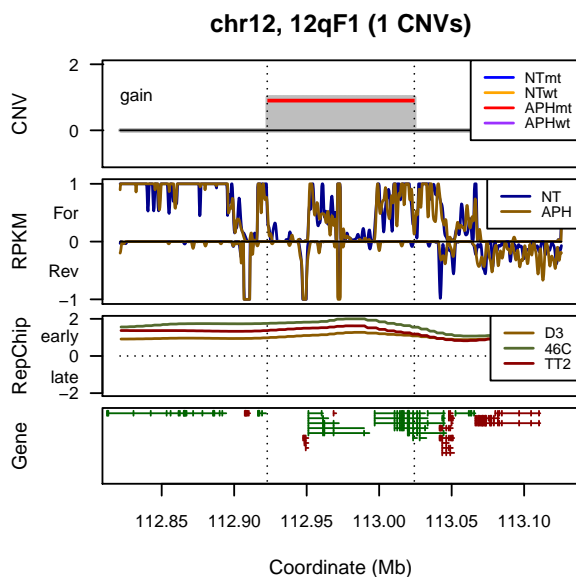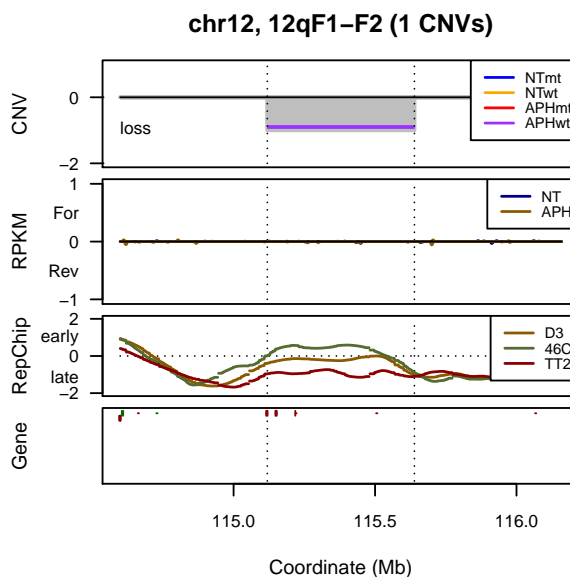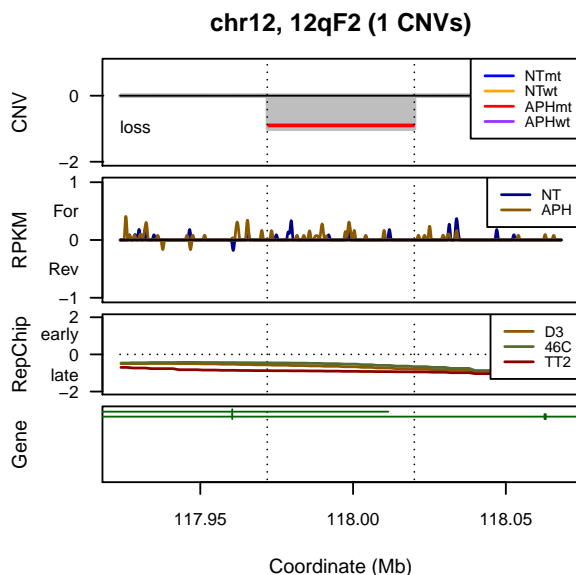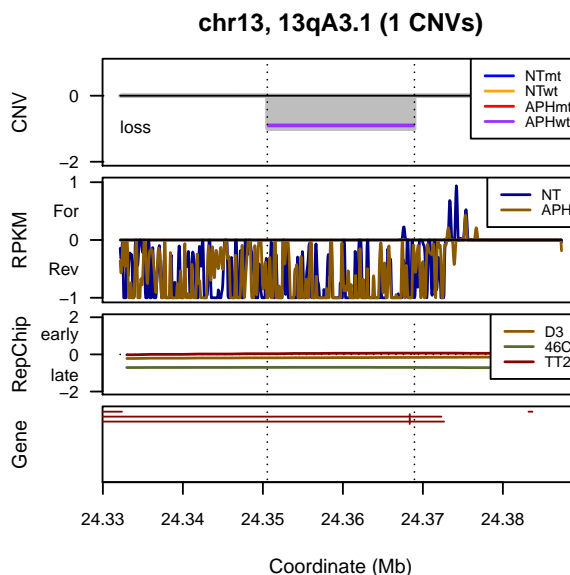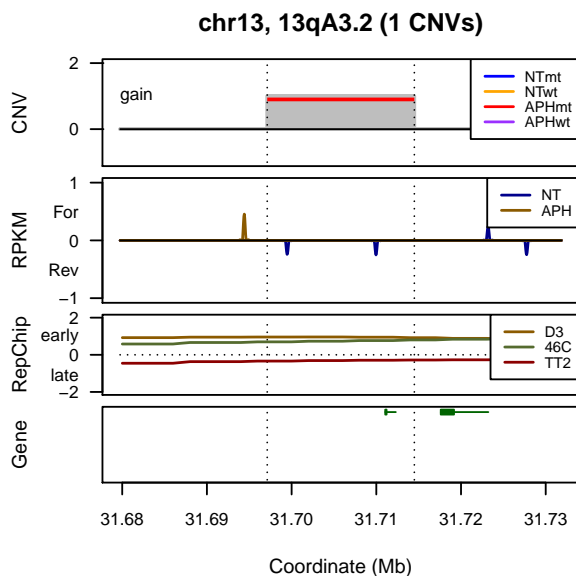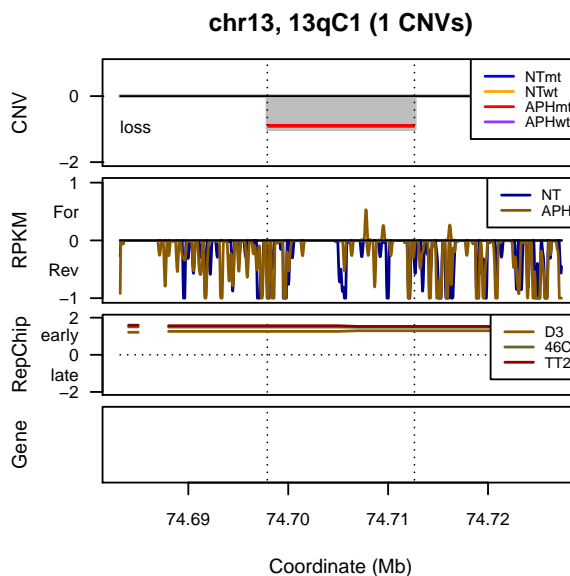

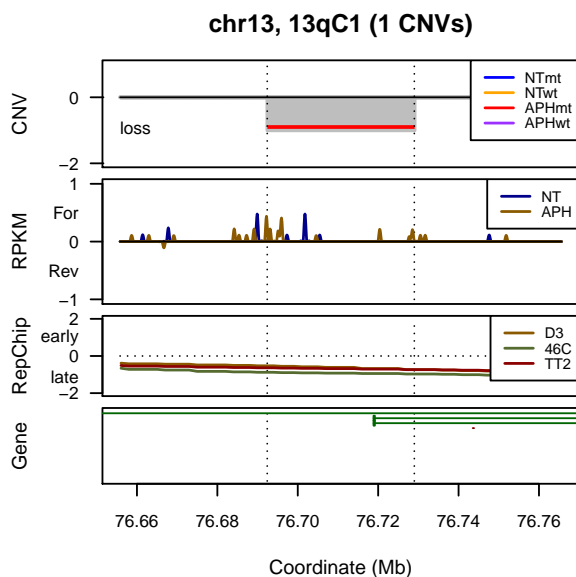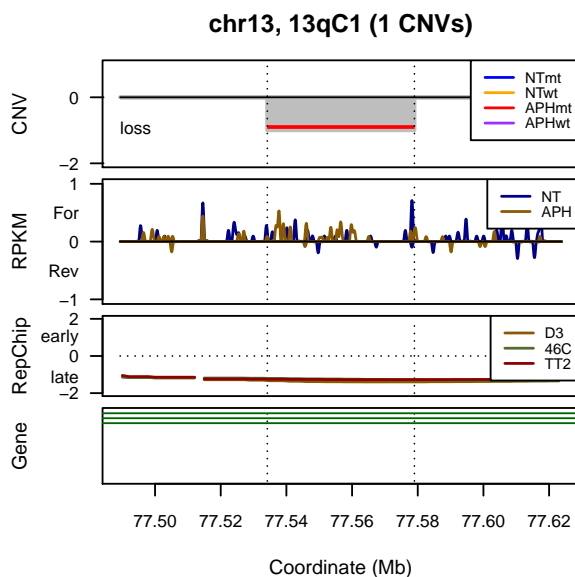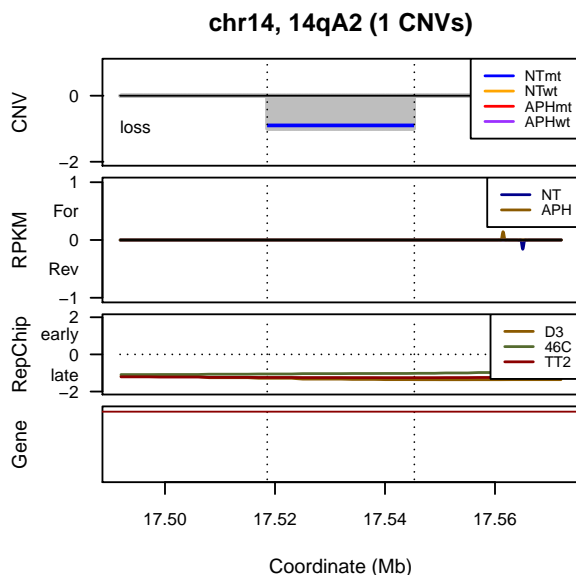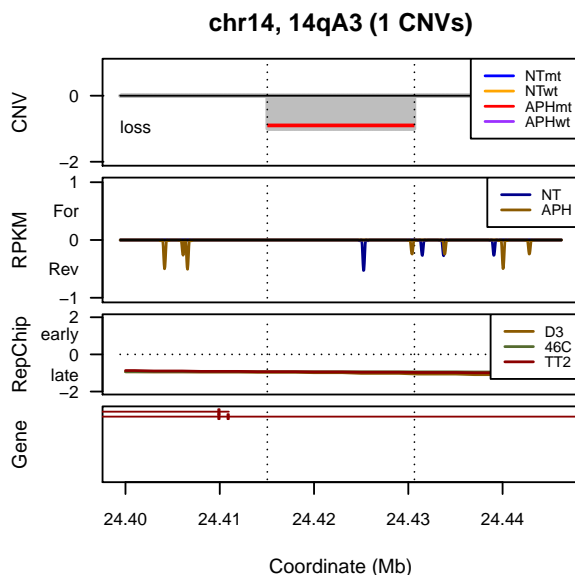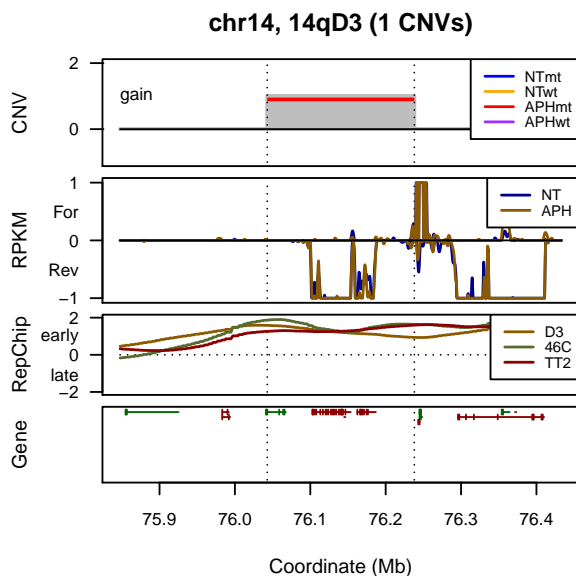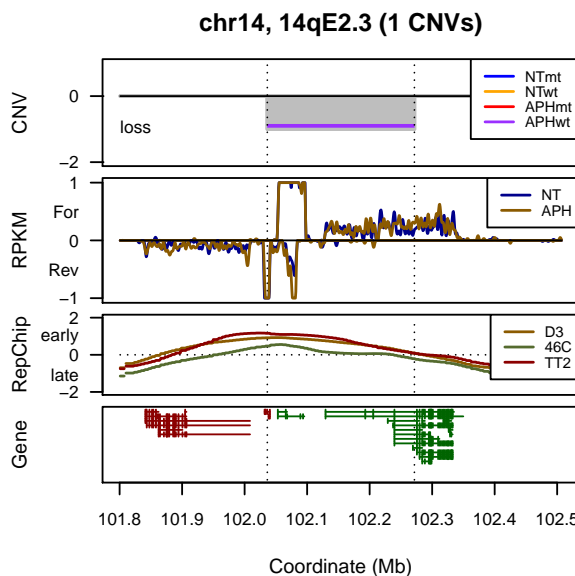

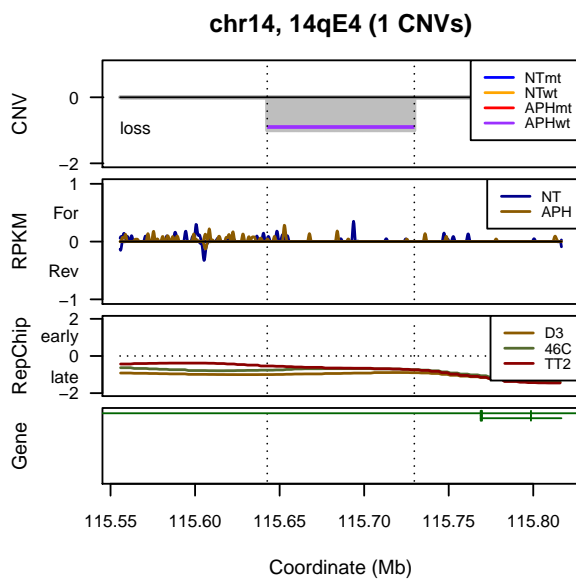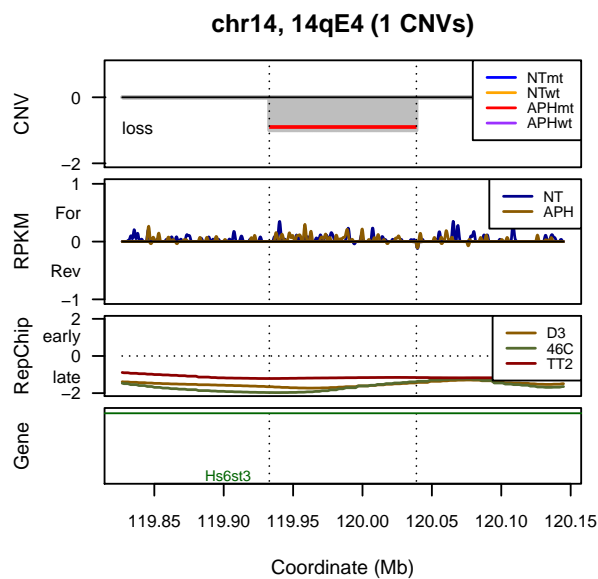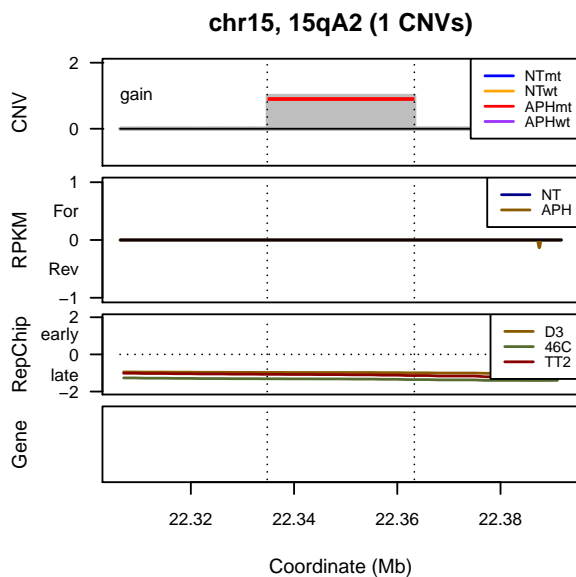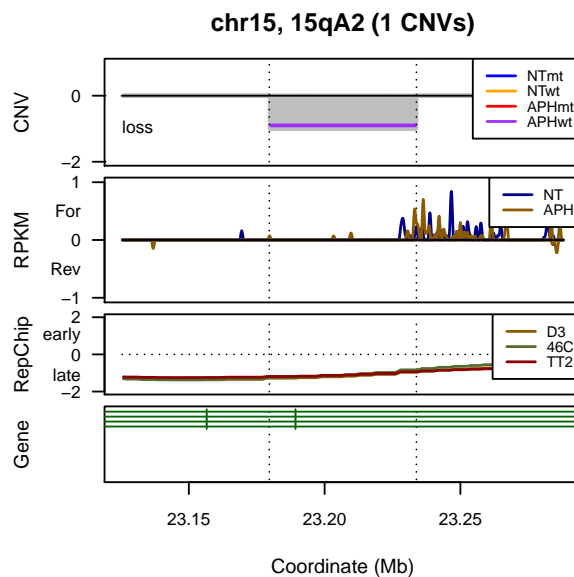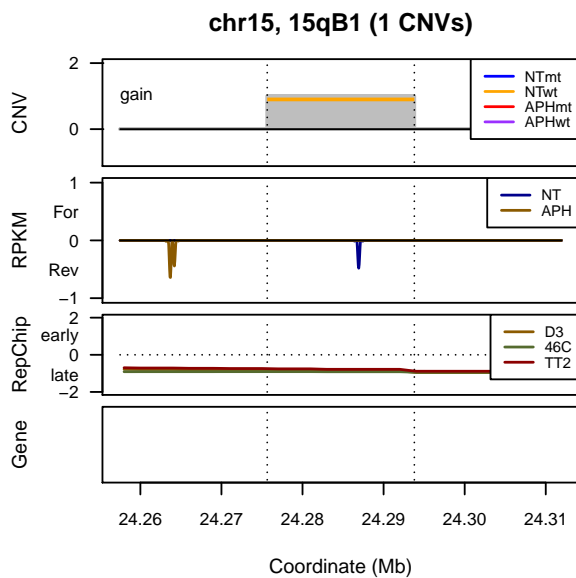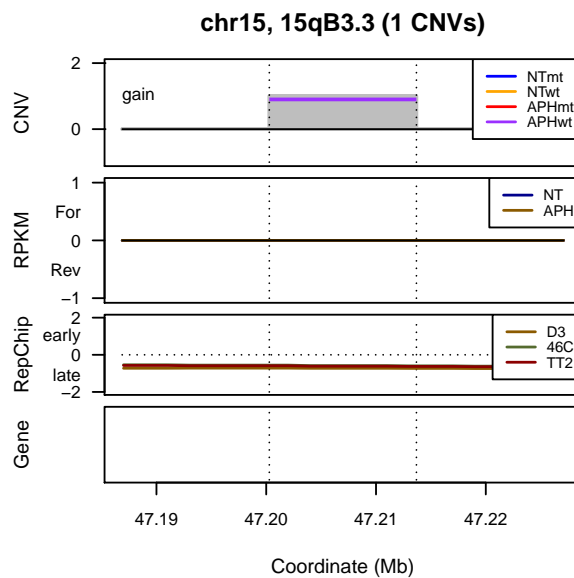

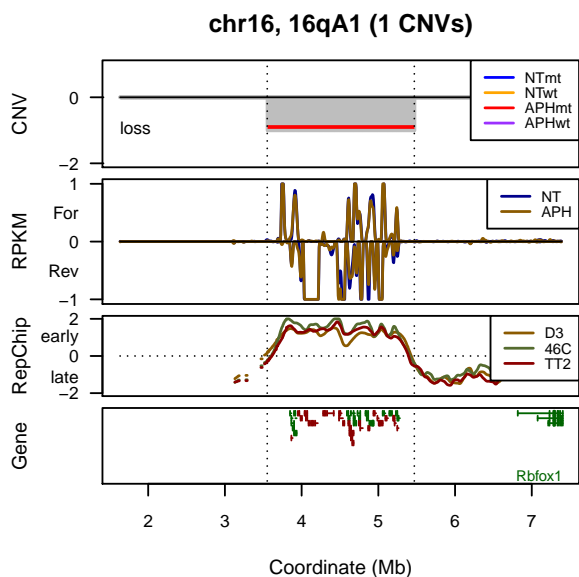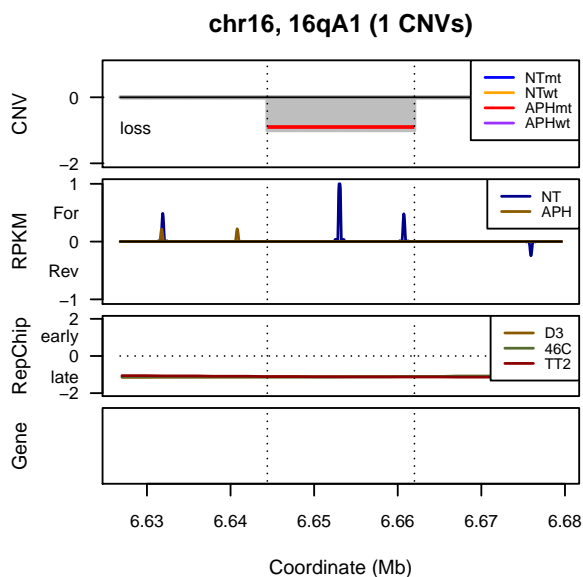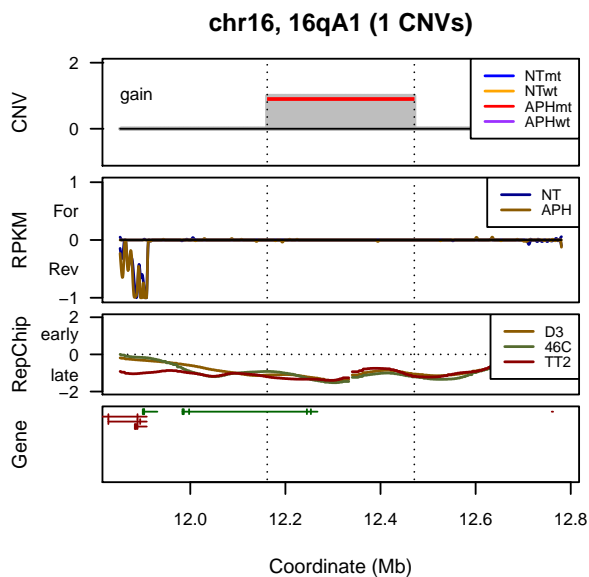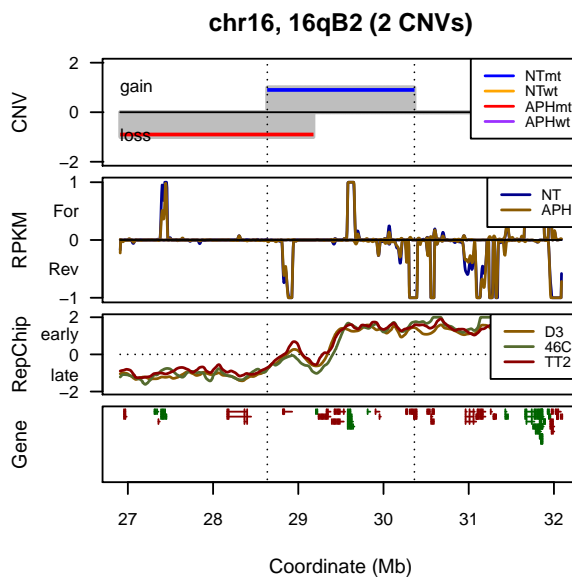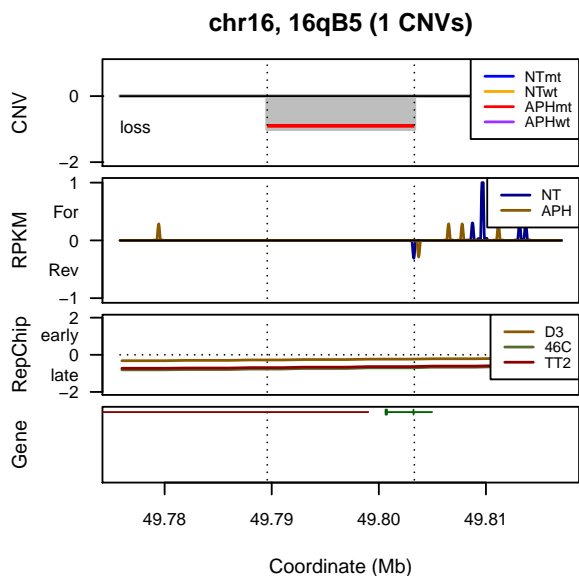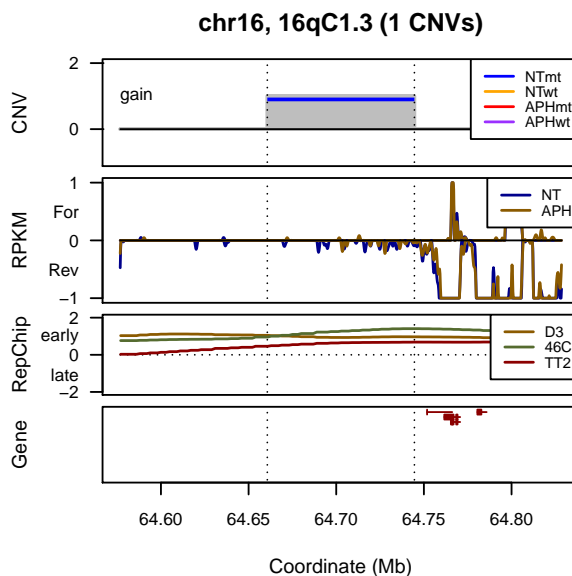

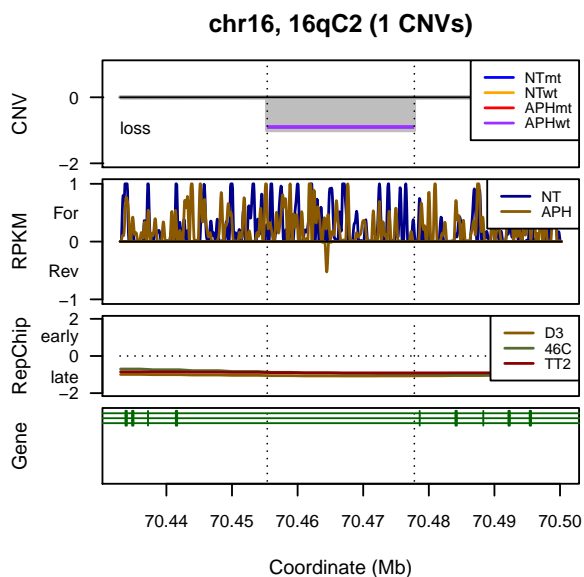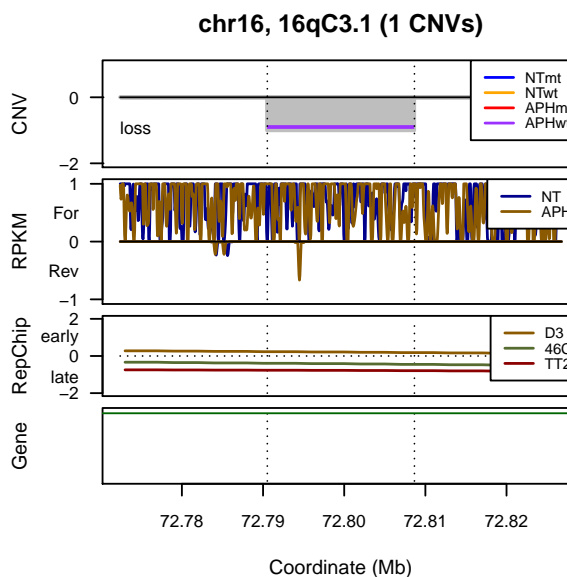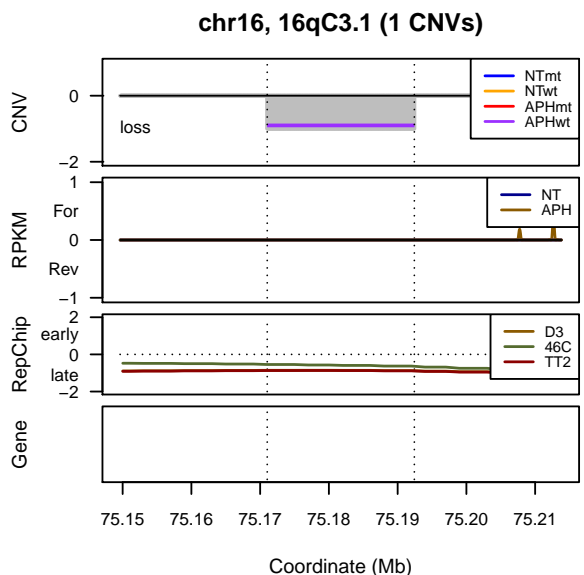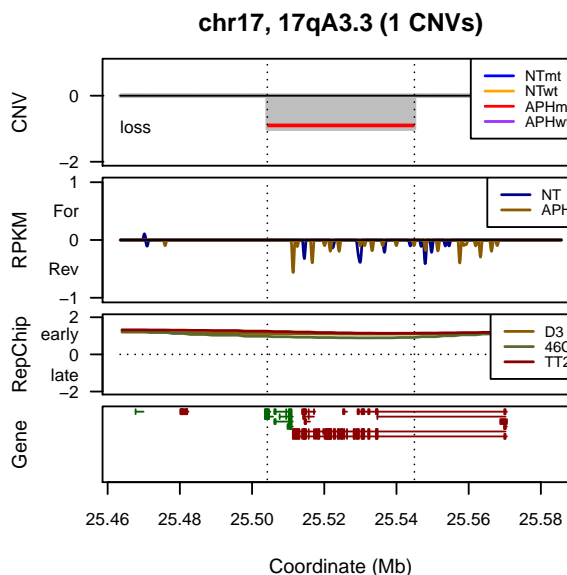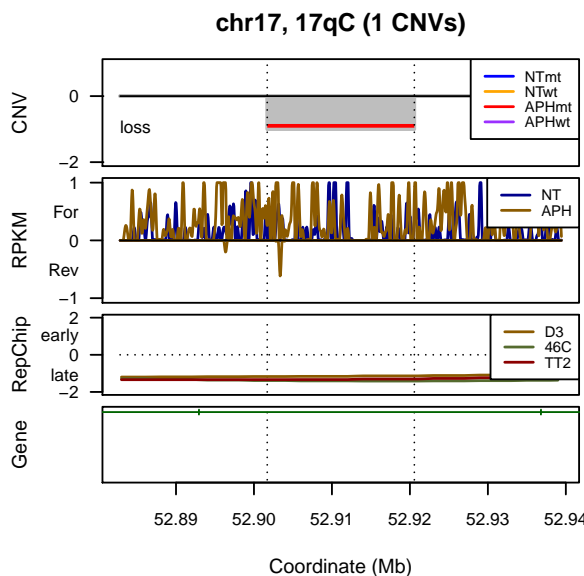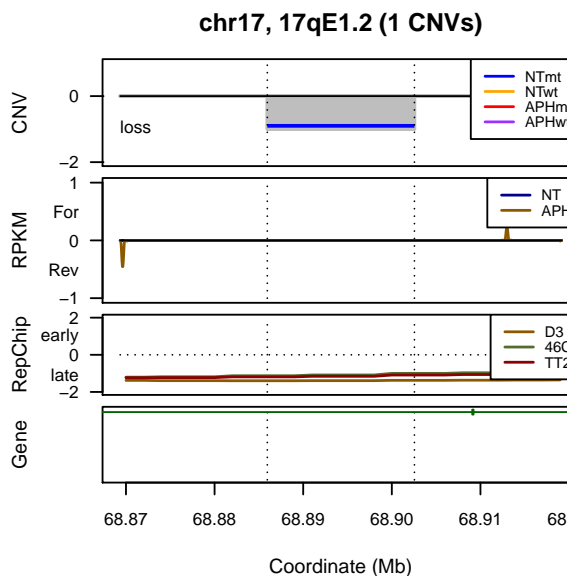

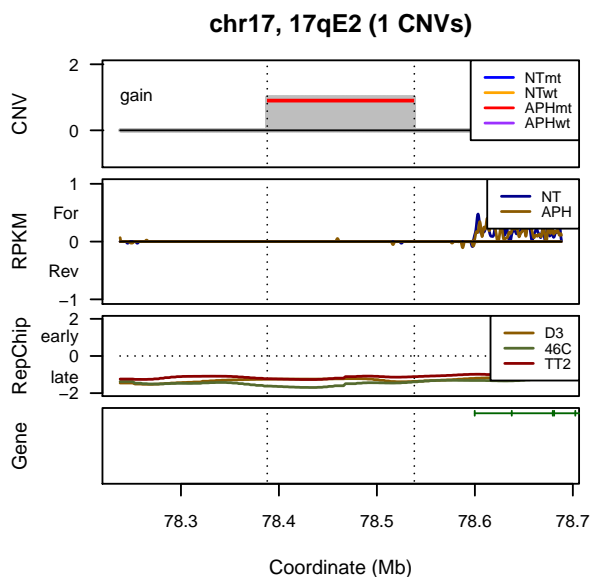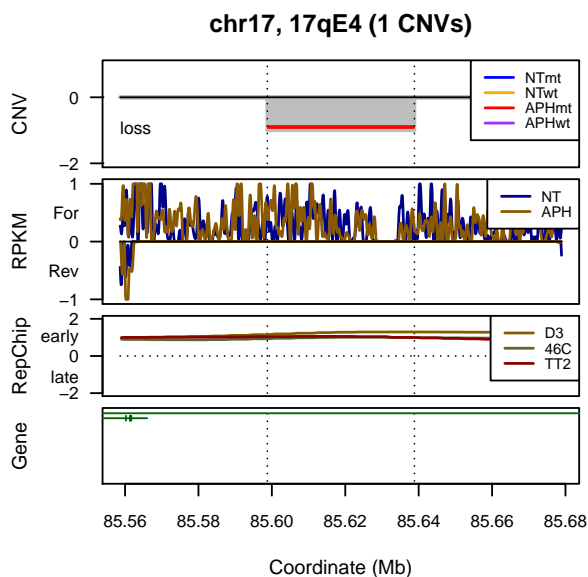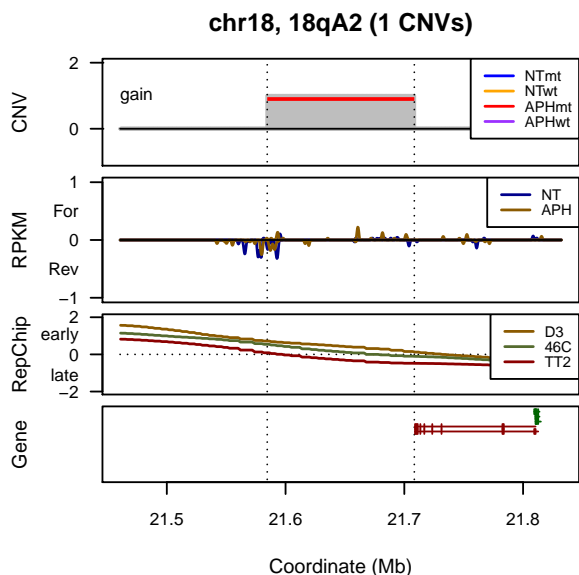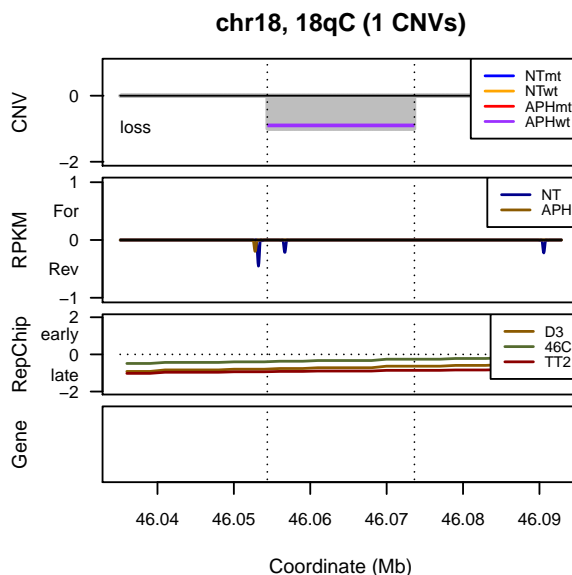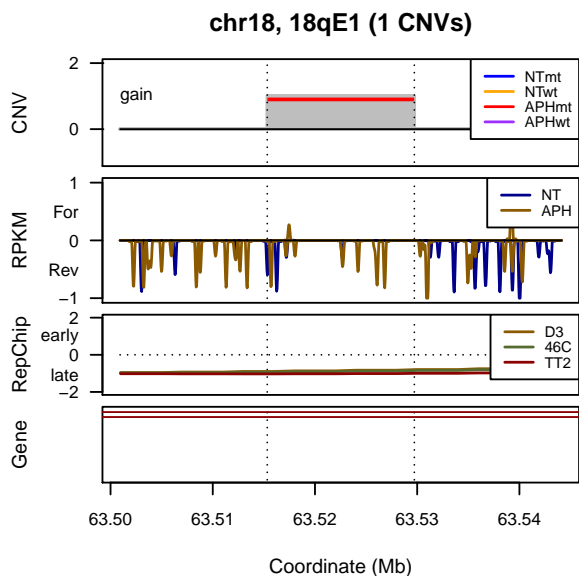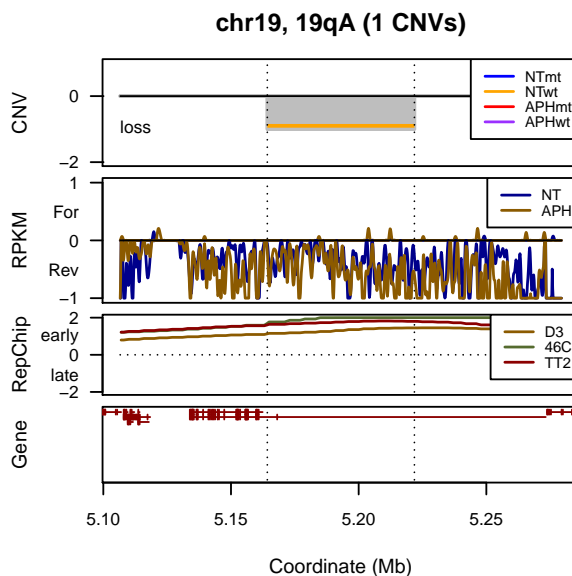

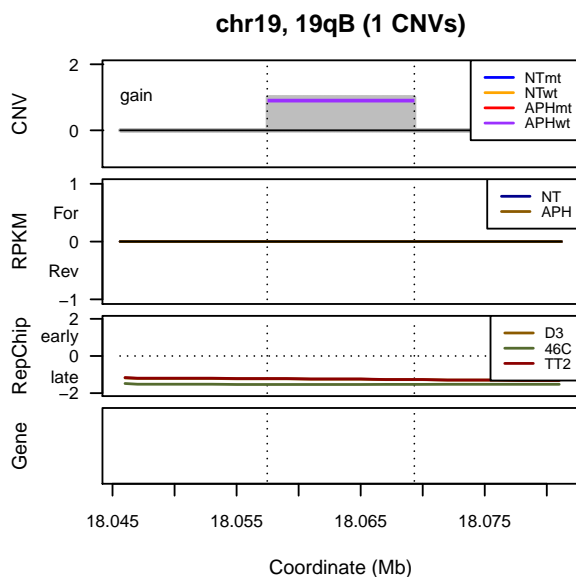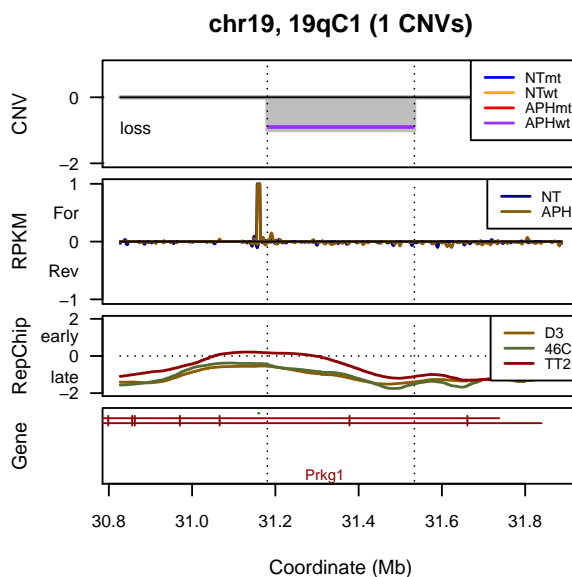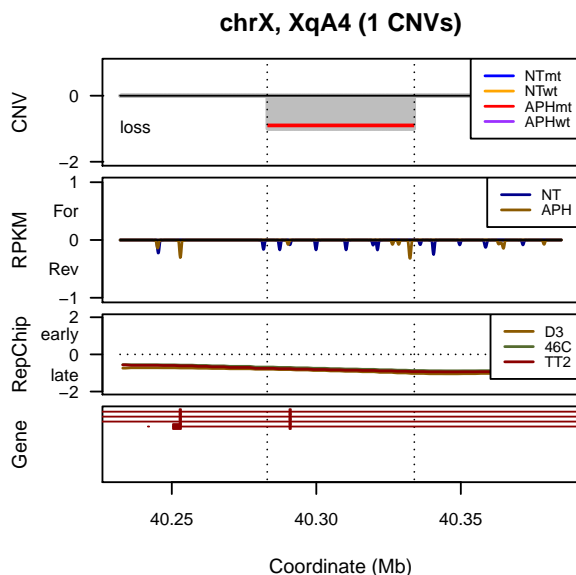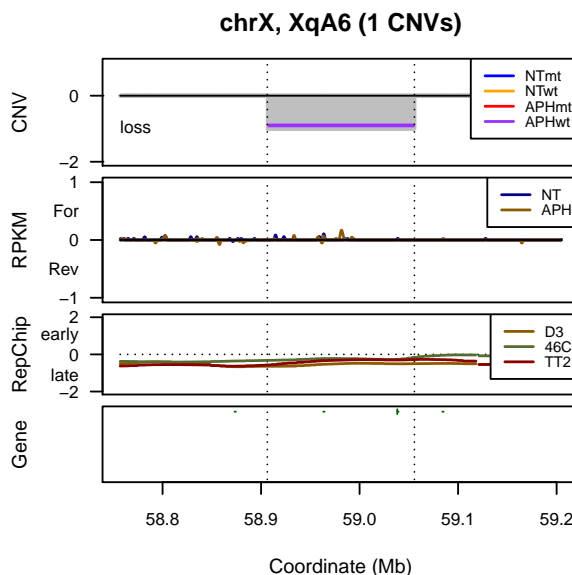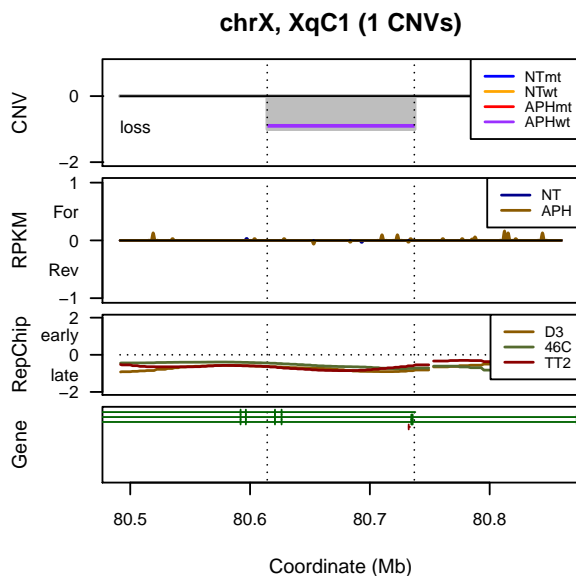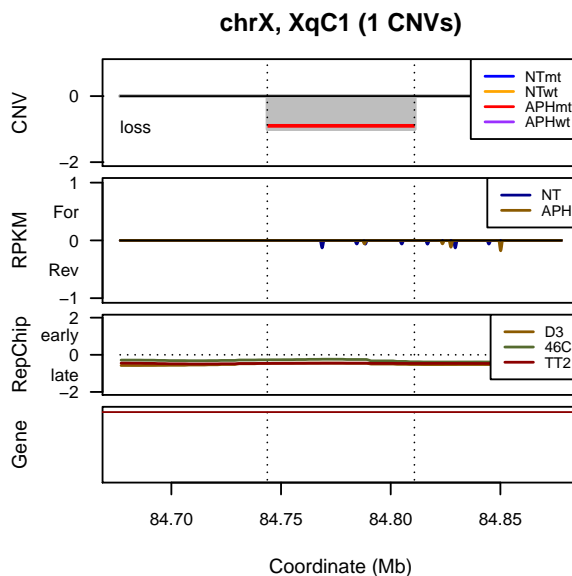

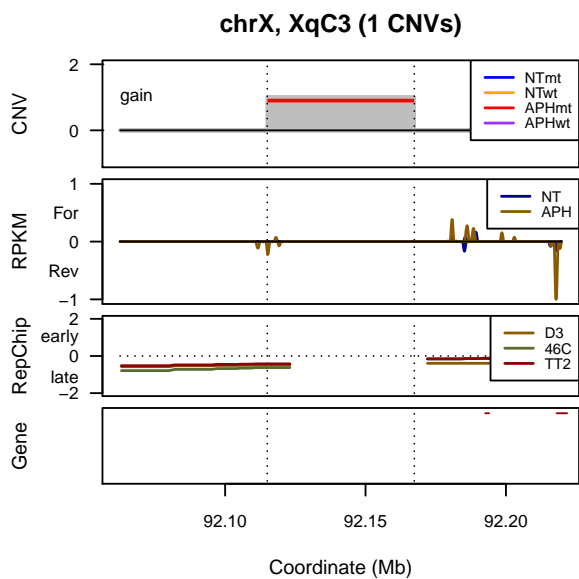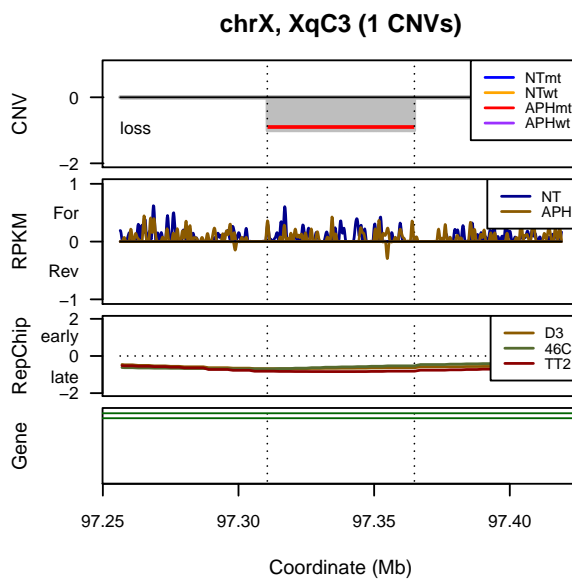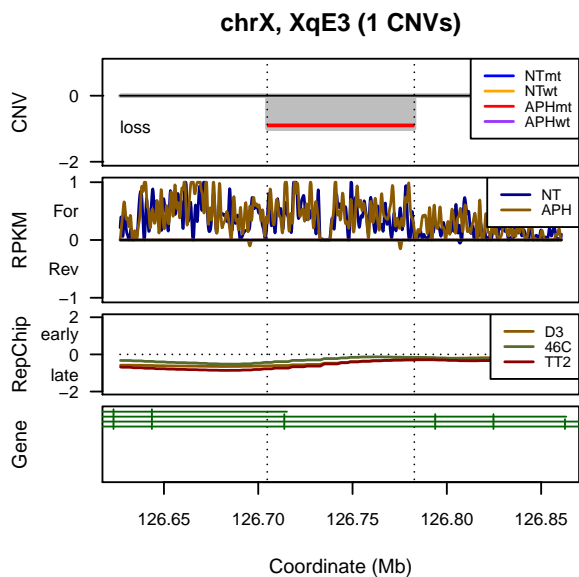

Supplement: supp_gr.177121.114_Figure_S1H.pdf [file supp_gr.177121.114_Figure_S1H.pdf]
