# Supplementary material for: Large transcription units unify copy number variants and common fragile sites arising under replication stress
Source: Genome Res. 2015 Feb;25(2):189–200. doi: 10.1101/gr.177121.114 (PMC4315293; doi:10.1101/gr.177121.114)
Supplement: Supplemental Material [file supp_gr.177121.114_Table_S3A.xlsx]

## Sheet: 090
											number_of_CNVs
chrom	start	end	size(Kb)	band	RPKM	txn_coverage	longest_txn_unit(Kb)	genes(>500Kb)	rep_timing	CNV_coverage	APH	HU	IR	NT	all
chr3	115594174	118221011	2627	3q13.31-32	0.157	0.808	2201	LSAMP,RP11-384F7.1	S4(2.4)	1	11	20	7	3	41
chr7	69064636	71273602	2209	7q11.22	0.808	0.551	1220	AUTS2,CALN1,WBSCR17	S4(1.5)	1	6	5	10		21
chr16	78037130	78877618	840	16q23.1	0.038	0.887	881	WWOX	S4(1.8)	1	6		2	1	9
chr10	52699410	53983384	1284	10q11-21	0.9	0.971	1046	PRKG1	S3(3.3)	0.607	2	3	1	1	7
chr1	71870126	72933163	1063	1p31.1	0.396	1	914	NEGR1	S4(2.1)	0.784	6	1			7
chr9	21503820	23726069	2222	9p21.3	0.571	0.207	205		S3(3.2)	1	1	1	4		6
chr1	245413423	246284662	871	1q44	0.64	1	832	KIF26B,SMYD3	S3(3.4)	0.969	1	3	1		5
chr3	76299612	77188041	888	3p12.3	0.029	0.745	1096	ROBO2	S4(1.9)	0.889	1	2	2		5
chr7	77911946	78578763	667	7q21.11	0.258	1	1475	MAGI2	S2(4)	1	3	1		1	5
chr1	173615117	175294275	1679	1q25.1	0.5	0.73	840	RABGAP1L	S3(3)	0.522	2		2		4
chr3	174018217	175087884	1070	3q26.31	0.334	0.914	1371	NAALADL2	S3(3.3)	0.344	2	1	1		4
chr6	56077916	57305875	1228	6p11-12	4.839	0.912	522		S1(5.2)	0.898			2	1	3
chr8	139618753	142414326	2796	8q24.23-3	0.542	0.516	738	TRAPPC9	S2(3.5)	0.997	1	2			3
chr11	126153842	126788587	635	11q24.2	1.438	1	588	KIRREL3	S1(4.6)	0.326		3			3
chr7	110746607	110846803	100	7q31.1	0.158	1	929	IMMP2L	S4(2.2)	1	3				3
chr2	36626077	36756196	130	2p22.2	16.46	1	227		S1(5.3)	0.857		3			3
chr2	205121597	206342082	1220	2q33.3	0.416	0.781	1081	PARD3B	S3(3.4)	0.709	1	1	1		3
chr10	127737929	128183308	445	10q26.2	3.567	1	407		S2(4.2)	1	1	1	1		3
chr16	83212397	83993943	782	16q23.3	0.505	0.903	1171	CDH13	S3(3.4)	0.544	1	1	1		3
chr12	1232370	1634168	402	12p13.33	1.362	1	539	ERC1	S1(5.4)	0.982		2			2
chr7	130601204	131186424	585	7q32.3	3.171	1	424		G1(5.5)	1		2			2
chr15	60146105	60687676	542	15q22.2	2.941	0.131	79		S2(4.3)	1		2			2
chr10	79105845	80874055	1768	10q22.3	0.304	0.659	787	KCNMA1	S1(5.1)	1		1		1	2
chr18	33127376	34075416	948	18q12.2	0.526	0.686	531		S2(4.1)	1		1	1		2
chr12	76572057	76738542	166	12q21.2	0.399	0.517	91		G1(5.6)	1		1		1	2
chr5	95226654	95475649	249	5q15	7.641	1	824	CTD-2337A12.1	G1(5.6)	1		2			2
chr2	123720745	124382907	662	2q14.3	0.001	0	0		G2(1.4)	1	1		1		2
chr15	22652329	24980273	2328	15q11.2	0.082	0.181	144		S4(2.1)	1			2		2
chr14	67739284	69287483	1548	14q23-24	0.419	0.817	807	RAD51B	S1(5.1)	1			1	1	2
chr6	101049107	102037684	989	6q16.3	0.579	0.308	383	GRIK2	S3(3)	0.804	1	1			2
chr12	78470212	79187110	717	12q21.2	1.059	0.274	439		S3(3.2)	1		2			2
chr14	50087752	50934205	846	14q21-22	0.896	0.996	119		G1(5.6)	0.121	1	1			2
chr5	93930968	94206714	276	5q15	0.188	0.444	480	MCTP1	S3(2.6)	1			1	1	2
chr5	58535683	59371938	836	5q11-12	0.004	0.004	3	PDE4D	S3(2.8)	0.261	1	1			2
chr3	65608150	65908894	301	3p14.1	2.851	1	748	MAGI1	S2(4.2)	1			1	1	2
chr1	221081247	222278243	1197	1q41	0.12	0.377	138		S1(4.5)	1			1	1	2
chr20	14764446	15435564	671	20p12.1	0.024	0.778	1311	MACROD2	S4(1.9)	0.14	2				2
chr1	98369743	99132070	762	1p21.3	0.648	0.576	868	DPYD	S1(4.7)	1		1		1	2
chr3	186976990	188315629	1339	3q27-28	0.775	0.399	828	LPP	S1(4.6)	0.771		1	1		2
chr19	57748815	58049721	301	19q13.43	0.696	1	114		S2(3.6)	1			1		1
chr11	98894021	100585889	1692	11q22.1	0.005	0.019	305	CNTN5	S4(1.8)	1	1				1
chr4	7774351	7904431	130	4p16.1	4.604	1	227		G1(5.6)	1	1				1
chr2	187397844	187612651	215	2q32.1	0.756	1	240		S1(4.6)	1	1				1
chr14	28238479	28260166	22	14q12	0.001	0	0	CTD-3006G17.2	G2(1.3)	1		1			1
chr14	107246845	107289053	42	14q32.33	0	0	0		S4(1.6)	1		1			1
chr18	6996231	7585140	589	18p11.23-31	0.034	0.114	845	PTPRM	S3(2.9)	1			1		1
chr13	94768635	95370041	601	13q31-32	0.261	0.733	1204	GPC6	S2(3.7)	1		1			1
chr6	86208524	86240951	32	6q14.3	1.593	1	216		G1(5.5)	1		1			1
chr8	89479672	89903532	424	8q21.3	0.008	0	0		S4(2.3)	1	1				1
chr3	83856347	83879054	23	3p12.1	0.002	0	0		G2(1.2)	1		1			1
chr7	81791526	82052351	261	7q21.11	0.666	1	519		S2(3.8)	1				1	1
chr2	39552584	39675339	123	2p22.1	2.031	1	208		S1(5.3)	1		1			1
chrX	119388533	119726387	338	Xq24	0.622	0.47	87		S3(3.1)	1			1		1
chr22	48078911	48853846	775	22q13.31-32	0.009	0.044	34		S4(2.1)	1				1	1
chr14	82623846	83425811	802	14q31.1	0.001	0.004	3		G2(1.4)	1			1		1
chr12	48366448	50539419	2173	12q13.11-12	0.401	0.565	174		S1(5.1)	1			1		1
chr3	124163861	125880208	1716	3q21.2-3	1.114	0.6	320	KALRN	S1(4.9)	1		1			1
chr1	165384620	165414933	30	1q23.3	0	0	0		S3(2.6)	1				1	1
chr19	13919876	13976951	57	19p13.13	1.316	1	46		G1(5.6)	1	1				1
chr15	89742221	89816682	74	15q26.1	0.303	0.745	136		S1(5.3)	1		1			1
chr4	89418147	89641297	223	4q22.1	1.433	1	360		S1(4.9)	1			1		1
chr1	16063697	16082976	19	1p36.21	0.05	0.844	12		G1(5.7)	1				1	1
chr3	122864435	122920007	56	3q21.1	0.859	1	211		S2(4.3)	1			1		1
chr12	38070907	38124847	54	12q11	0	0	0		S4(1.5)	1		1			1
chr2	24293466	26322040	2029	2p23.3	0.361	0.814	298		S1(4.8)	1			1		1
chr2	197118021	197321747	204	2q32.3	1.812	1	426		S1(5)	1				1	1
chrX	29120488	29281360	161	Xp21.3	0.001	0	0	IL1RAPL1	S4(1.5)	1	1				1
chr14	87318231	87342981	25	14q31.3	0.002	0	0		S3(3.2)	1			1		1
chr9	140195008	140419027	224	9q34.3	0.042	0.692	120		S1(5.3)	1			1		1
chr7	96108585	96541568	433	7q21.3	0.156	0.277	120		S4(1.7)	1				1	1
chr10	102722915	102845241	122	10q24.31	0.279	0.879	58		G1(5.6)	1				1	1
chrX	136442810	136488216	45	Xq26.3	0.001	0	0		G2(1.4)	1			1		1
chr7	31791964	31904554	113	7p14.3	3.929	1	501	PDE1C	S3(3.1)	1				1	1
chr19	37028542	37285393	257	19q13.12	0.366	1	86		S4(2.2)	1	1				1
chr9	101158946	101494214	335	9q22.33	0.178	0.934	422		S1(4.9)	1		1			1
chr8	61462540	61522008	59	8q12.1	4.981	1	113		S3(2.7)	1		1			1
chr11	122592151	122619330	27	11q24.1	1.711	1	180		G1(5.5)	1			1		1
chr13	26516459	26523528	7	13q12.13	0.001	0	0	ATP8A2	S4(2.3)	1			1		1
chr6	8447792	8733517	286	6p24.3	0.079	1	350		S4(1.8)	1			1		1
chr12	133179463	133212582	33	12q24.33	0.092	0.697	74		S1(4.7)	1			1		1
chr9	126150829	126273802	123	9q33.3	0.339	1	553	DENND1A	S2(3.8)	1		1			1
chr3	119389744	119407403	18	3q13.33	0.175	0.383	40		S2(4.2)	1		1			1
chr19	30815815	30818237	2	19q12	0.432	1	504		S4(2.1)	1			1		1
chr13	83165999	83172118	6	13q31.1	0.001	0	0		S4(2.2)	1		1			1
chr13	98426355	98473033	47	13q32.2	0.009	0.129	6		S2(4.1)	1				1	1
chr8	12952229	13044729	93	8p22	6.916	1	203		S1(5.2)	1		1			1
chr6	93882386	93901016	19	6q16.1	0.001	0	0		G2(1.3)	1		1			1
chr18	66044556	66067465	23	18q22.1	0.003	0	0		S2(3.9)	1		1			1
chr8	109724035	109818225	94	8q23.1	0.001	0	0		S4(1.6)	1			1		1
chr10	75470943	75902177	431	10q22.2	2.789	0.733	153		G1(5.7)	1		1			1
chr1	198117641	198225933	108	1q31.3	18.583	1	304		S1(4.8)	1		1			1
chr13	48219279	48577185	358	13q14.2	0.258	0.681	105		S3(3.3)	1		1			1
chr17	35870832	35922443	52	17q12	1.51	1	101		S1(5.1)	1		1			1
chr6	37623565	37789321	166	6p21.2	0.053	0.33	400		S1(5.3)	1		1			1
chr1	33915750	34151260	236	1p35.1	0.69	0.908	652	CSMD2	S1(5)	1	1				1
chr15	93645825	93700207	54	15q26.1	0.001	0	0		S2(3.8)	1			1		1
chr18	37958897	37973658	15	18q12.3	0.001	0	0		S4(1.9)	1		1			1
chr16	88447963	88579725	132	16q24.2	0.141	1	86		G1(5.6)	1			1		1
chr3	48697653	48787219	90	3p21.31	0.701	1	107		G1(5.6)	1		1			1
chr12	15070186	15087928	18	12p12.3	0.007	0	0		S3(2.8)	1		1			1
chrX	77047295	78917927	1871	Xq21.1	0.085	0.18	159		S4(2.3)	1				1	1
chr13	60341395	60429001	88	13q21.2	1.411	1	510		S3(3)	1		1			1
chr3	171842566	171967050	124	3q26.31	5.249	1	390		S1(4.6)	1			1		1
chr17	59135850	59222204	86	17q23.2	0.367	1	722	BCAS3	S1(5)	1			1		1
chrX	153978543	153981627	3	Xq28	0.024	1	80		S1(4.5)	1			1		1
chr12	62097592	62126486	29	12q14.1	0.001	0	0	FAM19A2	G2(1.4)	1				1	1
chr15	86003865	86262304	258	15q25.3	2.137	1	382		S1(4.8)	1		1			1
chr9	132957522	132995160	38	9q34.11	0.393	1	71		G1(5.6)	1			1		1
chr5	132024165	134262767	2239	5q31.1	0.641	0.492	118		S1(4.8)	1			1		1
chr1	5682831	5707938	25	1p36.31	0	0	0		S4(2.1)	1	1				1
chr8	99936267	100134972	199	8q22.2	0.777	0.985	872	STK3,VPS13B	S1(5)	1		1			1
chr2	212642373	212938165	296	2q34	0.045	1	1163	ERBB4	S4(1.5)	1	1				1
chr20	19641525	19644222	3	20p11.23	0.001	0	0	SLC24A3	S1(4.8)	1			1		1
chr22	29169419	29302906	133	22q12.1	0.562	1	179		S1(5.3)	1				1	1
chr1	180010910	180206814	196	1q25.2	1.157	0.713	167		G1(5.5)	1				1	1
chr5	97809407	97881266	72	5q15	0.005	0	0		S1(4.8)	1		1			1
chr6	130113881	130275975	162	6q22.33	0.005	0.111	18		S1(5.1)	1		1			1
chr9	80640289	80647801	8	9q21.2	1.068	1	344		S3(3.4)	1			1		1
chr13	76115988	76250576	135	13q22.2	6.713	1	235		S1(5.2)	1		1			1
chr5	136832278	137685415	853	5q31.2	0.397	0.682	575	SPOCK1	S2(4)	1			1		1
chr6	9914293	12385692	2471	6p24.1-3	0.18	0.415	261	OFCC1	S2(3.8)	1			1		1
chrX	99355145	99747494	392	Xq22.1	0.002	0.01	4		S4(2.1)	1			1		1
chr6	26205058	26206299	1	6p22.2	0.894	1	37		S4(2.1)	1	1				1
chr17	73175293	73204137	29	17q25.1	0.357	0.376	52		G1(5.6)	1			1		1
chr12	99416868	99568395	152	12q23.1	0.002	0.02	3	ANKS1B	S4(2.2)	1		1			1
chr14	55056019	55170103	114	14q22.2	4.439	1	243		S1(5.2)	1		1			1
chr1	93639100	93770334	131	1p22.1	0.631	1	170		S1(5.3)	1		1			1
chr20	54418611	56406269	1988	20q13.2-31	0.103	0.204	73		S3(3.4)	1				1	1
chr6	3230687	3525915	295	6p25.2	0.366	0.715	201		S1(4.8)	1			1		1
chrX	101152643	101782766	630	Xq22.1	0.001	0.014	9		S4(2.4)	1			1		1
chr4	42999071	45147644	2149	4p12-13	0.028	0.072	85		S4(1.5)	1		1			1
chr21	36235738	36350947	115	21q22.12	1.97	1	269	RUNX1	S1(4.9)	1		1			1
chr15	77488453	77606441	118	15q24.3	3.076	1	336		S1(4.7)	1		1			1
chr10	56726939	56757641	31	10q21.1	0.001	0	0	PCDH15	G2(1.2)	1		1			1
chr5	148981045	149007749	27	5q32	0.028	1	94		G1(5.7)	1			1		1
chr13	55522371	55657029	135	13q21.1	0.001	0	0		G2(1.2)	1		1			1
chr5	156085528	156466154	381	5q33.3	0.279	0.294	112	SGCD	S4(2.3)	1			1		1
chr5	64060579	64450343	390	5q12.3	0.495	0.915	373		S1(5.3)	1		1			1
chr3	9917653	9962816	45	3p25.3	0.173	0.693	17		G1(5.7)	1		1			1
chr14	65000037	65292670	293	14q23.3	0.065	0.412	55		S1(5.1)	1	1				1
chr5	65222483	65267045	45	5q12.3	10.488	1	214		G1(5.6)	1		1			1
chr12	21421342	21425513	4	12p12.1	0.001	0	0		S4(2.4)	1	1				1
chr15	83326937	83497660	171	15q25.2	0.246	0.598	160		S2(4)	1		1			1
chr8	18768744	19136617	368	8p21-22	1.993	0.728	611	PSD3	G1(5.5)	1			1		1
chr14	30094802	30393702	299	14q12	1.622	1	629	PRKD1	S3(3.3)	1			1		1
chr21	20402381	21091515	689	21q21.1	0.001	0	0		G2(1.4)	1		1			1
chr4	174364386	174406742	42	4q34.1	0.138	1	157		S2(4)	1		1			1
chr1	111908431	111967008	59	1p13.2	0.008	0.214	16		S1(4.9)	1			1		1
chr6	138313241	138314297	1	6q23.3	0.002	0	0		S2(4.4)	1		1			1
chr11	103350974	103545761	195	11q22.3	0.045	0.707	383		S1(4.8)	1		1			1
chr3	114340953	114598974	258	3q13.31	0.43	1	831	ZBTB20	S2(4.4)	1			1		1
chr6	73388289	73845875	458	6q13	2.461	1	594	KCNQ5	S2(4.4)	1		1			1
chr17	48644536	48733349	89	17q21.33	0.044	0.314	58		G1(5.7)	1			1		1
chr2	148835354	149060061	225	2q23.1	0.871	1	361		S4(1.7)	1		1			1
chr1	85841484	85946120	105	1p22.3	7.282	1	301		G1(5.6)	1		1			1
chr2	201796521	202002253	206	2q33.1	1.088	1	108		G1(5.5)	1		1			1
chr17	14351968	14404716	53	17p12	0.013	0.143	82		S3(3.1)	1		1			1
chr18	76315260	76384064	69	18q23	0	0	0		S4(1.6)	1				1	1
chr2	241382082	241470735	89	2q37.3	0.202	1	106		S2(4.1)	1				1	1
chr5	7909906	7936153	26	5p15.31	0.083	0.937	56		S4(2.2)	1		1			1
chr14	59195738	59239300	44	14q23.1	0.02	0.385	25		S2(4.3)	1				1	1
chr5	99950504	100548031	598	5q21.1	0.004	0.056	955		G2(1.4)	1			1		1
chr3	71148011	71525688	378	3p13	1.043	1	639	FOXP1	S1(4.8)	1		1			1
chr4	94092082	95567051	1475	4q22.2-3	1.126	0.204	228	GRID2	S3(2.8)	1			1		1
chr1	8467533	8702753	235	1p36.23	1.273	1	506		G1(5.5)	1	1				1
chr2	239134137	240101940	968	2q37.3	0.495	0.717	364		S1(4.7)	1				1	1
chr12	70002096	70005534	3	12q15	0.05	1	27		S1(4.6)	1		1			1
chr14	37736704	38653247	917	14q13-21	0.063	0.373	367		S3(3.1)	1				1	1
chr12	43248671	43285740	37	12q12	0.002	0	0		S2(4)	1				1	1
chr4	3424666	3526620	102	4p16.3	0.098	0.608	143		S1(4.8)	1			1		1
chr10	131922571	132016610	94	10q26.3	0.787	1	157		S4(2.3)	1		1			1
chr7	83678951	83702476	24	7q21.11	4.797	1	588	SEMA3A	S2(4)	1		1			1
chr13	36210238	36220281	10	13q13.3	0.194	1	736	NBEA	S3(3.3)	1		1			1
chr22	43372371	43473662	101	22q13.2	0.283	1	238		G1(5.5)	1		1			1
chr14	85061072	85196163	135	14q31.3	0.001	0	0		S4(1.6)	1		1			1
chr3	98943478	99387903	444	3q12.1	0.418	0.599	180		S1(4.9)	1		1			1
chr15	70828939	71141327	312	15q23	1.373	0.845	207		G1(5.6)	1		1			1
chr13	103694284	103726155	32	13q33.1	0.001	0	0		S3(2.6)	1		1			1
chr14	89921390	90087416	166	14q32.11	0.746	1	479	RP11-33N16.3	S1(4.7)	1			1		1
chr9	128358343	128454673	96	9q33.3	1.625	1	276		S1(5)	1		1			1
chr5	115345114	115352638	8	5q23.1	0.008	0	0		S2(4.2)	1			1		1
chr7	8042388	8112014	70	7p21.3	0.543	1	472		S3(3)	1		1			1
chr5	9077886	9310170	232	5p15.31	1.468	1	516	SEMA5A	S2(4.4)	1		1			1
chrX	95926253	95992855	67	Xq21.33	0.229	0.816	949	DIAPH2	S3(3)	1		1			1
chr6	20674941	20677232	2	6p22.3	0.436	1	713	CDKAL1	S3(3.3)	1		1			1
chr9	1472541	2447910	975	9p24.2-3	0.206	0.25	223		S4(2.4)	1		1			1
chr8	105271751	105833930	562	8q22.3	0.14	0.258	120	RP11-127H5.1	S2(4)	1			1		1
chr7	132956181	133312142	356	7q33	0.671	1	875	EXOC4	S3(2.5)	1	1				1
chr6	122743685	122765948	22	6q22.31	2.45	1	70		S4(2.2)	1				1	1
chr11	9490100	9681131	191	11p15.4	0.569	0.77	113		G1(5.6)	1			1		1
chr19	34551617	35465628	914	19q13.11	0.472	0.632	105		S1(4.6)	1				1	1
chrX	89729689	89774401	45	Xq21.31	0	0	0		G2(1.3)	1			1		1
chr14	47200945	47395484	195	14q21.3	0.002	0	0	MDGA2	G2(1.4)	1			1		1
chr6	91644579	91670249	26	6q15	0.001	0	0		G2(1.3)	1		1			1
chr4	79720869	80543277	822	4q21.21	0.316	0.314	282		S3(2.9)	1		1			1
chr10	39097911	39154220	56	10p11.1	0.004	0.295	37		S4(1.8)	1		1			1

## Sheet: HF1
											number_of_CNVs
chrom	start	end	size(Kb)	band	RPKM	txn_coverage	longest_txn_unit(Kb)	genes(>500Kb)	rep_timing	CNV_coverage	APH	PCR	all
chr10	53223446	53914073	691	10q21.1	0.86	1	1325	PRKG1	S3(3.3)	0.507	8		8
chr1	72088017	72637154	549	1p31.1	0.285	1	924	NEGR1	S4(1.8)	0.681	4		4
chr15	60972325	61130639	158	15q22.2	0.166	1	750	RORA	S2(4.1)	1	3		3
chrX	95963620	96793675	830	Xq21.33	0.487	1	936	DIAPH2	S4(2.2)	0.41	3		3
chr1	245742124	246118050	376	1q44	0.644	1	832	KIF26B,SMYD3	S2(3.8)	1	3		3
chr12	99765812	100262533	497	12q23.1	0.02	0.458	234	ANKS1B	S4(1.9)	1	3		3
chr16	83041537	83261615	220	16q23.3	0.058	1	1172	CDH13	S3(2.5)	1	2		2
chr1	58048796	58225373	177	1p32.2	0.17	1	1559	DAB1	S3(2.7)	1		2	2
chr3	173689779	174831994	1142	3q26.31	0.524	0.89	1375	NAALADL2,NLGN1	S3(3.3)	0.625	2		2
chr18	7859159	8116625	257	18p11.23	0.946	1	846	PTPRM	S4(2)	0.127	2		2
chr12	1067895	1684076	616	12p13.33	1.243	1	540	ERC1	S1(5.3)	0.583	2		2
chr7	110656251	110707029	51	7q31.1	0.363	1	928	IMMP2L	S4(2.2)	1	2		2
chr1	98035253	98160717	125	1p21.3	1.581	1	870	DPYD	S2(4)	1	2		2
chr4	86874894	87460112	585	4q21.23-3	0.217	1	644	ARHGAP24,MAPK10	S2(4.4)	1	2		2
chr7	78231922	78575481	344	7q21.11	1.004	1	1464	MAGI2	S2(3.8)	1	2		2
chr22	33922837	33994118	71	22q12.3	0.559	1	724	LARGE	S4(1.8)	1	1		1
chr10	13715421	13744567	29	10p13	2.345	1	406	FRMD4A	S1(4.5)	1	1		1
chr1	1527083	1733219	206	1p36.33	0.798	0.979	129		G1(5.5)	1	1		1
chr2	142374952	142405801	31	2q22.2	0.001	0	0	LRP1B	S4(2)	1	1		1
chr12	44573740	44743021	169	12q12	0.396	1	570	TMEM117	S4(2.3)	1	1		1
chr3	165940003	166065099	125	3q26.1	0	0	0		G2(1.3)	1	1		1
chr2	206256232	206301132	45	2q33.3	0.702	1	1109	PARD3B	S3(3.2)	1	1		1
chr6	86295429	86523508	228	6q14.3	1.244	0.439	162		S1(4.7)	1	1		1
chr13	21563311	21575612	12	13q12.11	2.802	1	103		S1(5)	1	1		1
chr16	2257374	2262987	6	16p13.3	1.198	1	16		G1(5.6)	1	1		1
chr20	14568758	14702440	134	20p12.1	0.004	0	0	MACROD2	S3(3.1)	1	1		1
chr1	8961863	9556061	594	1p36.22-23	0.439	0.453	96		S1(5.2)	1	1		1
chr16	78604831	78689352	85	16q23.1	0.032	1	568	WWOX	S4(1.7)	1	1		1
chr1	3518415	3522561	4	1p36.32	0.002	0	0		S2(4.3)	1	1		1
chr6	56436335	56643026	207	6p12.1	5.59	1	522		S1(4.6)	1	1		1
chr15	42895210	42941759	47	15q15.2	0.486	1	163		S1(5.3)	1	1		1
chr11	1075747	1083946	8	11p15.5	0	0	0		S1(4.9)	1	1		1
chr18	34345684	34992205	647	18q12.2	0.234	0.745	507		S3(3.3)	1	1		1
chr2	149055476	149161514	106	2q23.1	0.899	1	520		S4(2.1)	1	1		1
chr16	72598884	72696237	97	16q22.2	0.254	1	440		S3(2.6)	1	1		1
chr13	73373325	73390447	17	13q22.1	0.625	1	274		S3(3)	1	1		1
chr15	71908678	72038676	130	15q23	0.528	1	696	THSD4	S1(5)	1	1		1

## Sheet: mES
											number_of_CNVs
chrom	start	end	size(Kb)	band	RPKM	txn_coverage	longest_txn_unit(Kb)	genes(>500Kb)	rep_timing_ratio	CNV_coverage	APH+	APH-	NT+	NT-	all
chr5	132196230	132935046	739	5qG2	0.187	1	1109	Auts2	-0.8	1	11	21			32
chr2	67227958	67873163	645	2qC1.3	0.08	0.941	539		-1	1	4	11			15
chr8	117160241	117608147	448	8qE1	0.268	1	925	Wwox	-0.6	1	7	7			14
chr14	117568871	117958464	390	14qE4	0.037	1	1013	Gpc6	-1.3	1	5	5			10
chr12	35023370	35455164	432	12qA3	0.033	0.949	379		-1.1	1	5	4			9
chr2	140550330	141557233	1007	2qF3-G1	0.011	0.185	370	Macrod2	-0.9	0.99	2	7			9
chr2	161777720	162229484	452	2qH2	0.046	1	832	Ptprt	-1.3	1	4	4			8
chr17	90801259	91269143	468	17qE5	0.018	0.479	411	Nrxn1	-1.1	1	1	6			7
chr17	50995218	51146542	151	17qC	0.247	1	456		-1	1	3	4			7
chr6	21333254	21447908	115	6qA2	0.015	0.499	226	Kcnd2	-1.1	1		6			6
chr5	4957924	5164013	206	5qA1	0.065	1	588	Cdk14	-1.1	1	1	4			5
chr12	38642600	39183139	541	12qA3	0.06	0.416	261	Dgkb	-1	0.871	4	1			5
chr14	10761777	10964749	203	14qA1	0.036	1	802	Fhit	-1.1	1	3	2			5
chr15	32274448	33241562	967	15qB3.1	0.033	0.577	335	Pgcp	-1.2	0.26	3	2			5
chr5	81685383	82019131	334	5qD	0.063	1	662	Lphn3	-1	1	3	1			4
chr15	29596756	30675834	1079	15qB1-B2	0.042	0.56	821	Ctnnd2	-0.8	0.681	1	3			4
chr3	118447467	118817178	370	3qG1	0.004	0.046	17	Dpyd	-1.1	0.763	2	2			4
chr18	72160887	72297699	137	18qE2	0.001	0	0	Dcc	-1	1		3			3
chr7	56946520	57924682	978	7qB5	0.306	0.133	109	Nell1	-0.1	0.254	3				3
chr14	29993711	30337862	344	14qA3-B	0.013	0.451	374	Cacna2d3	-1.2	1	2	1			3
chr4	75876533	75983897	107	4qC3	0.015	0.274	141	Ptprd	-1.2	0.954	1	2			3
chr9	68997130	70201450	1204	9qC-D	0.241	0.547	517	Rora	0.7	0.479		3			3
chrX	110654439	110788538	134	XqE1	0.008	0	0	Dach2	-0.6	1	1	2			3
chr11	47096676	47346538	250	11qB1.1	0.015	0.536	144	Sgcd	-1	1		3			3
chr3	25419264	25924125	505	3qA3	0.007	0.006	3	Nlgn1	-1.1	0.421		3			3
chr10	31894091	32294843	401	10qA4	0.021	0.737	573		-0.9	1	1	2			3
chr10	104721435	104862903	141	10qD1	0.036	1	405		-1.2	1	1	2			3
chr12	42266930	42912024	645	12qB1	0.038	1	1076	Immp2l	0.7	0.407	3				3
chr12	93372248	93437491	65	12qD3	0.008	0.23	15		-1.1	0.83		2			2
chr3	76191698	76310373	119	3qE3	0.001	0	0	Fstl5	-1	1	1	1			2
chr8	79660047	79803051	143	8qC1	0.103	1	349		-1	0.891		2			2
chr6	77620620	77761812	141	6qC3	0.01	0	0	Ctnna2	-0.7	1	1	1			2
chrX	66724606	66940214	216	XqA7.1	0.006	0	0	Aff2	-0.6	1	2				2
chr1	21636785	21828953	192	1qA4	0.032	1	501	Kcnq5	-1.3	0.756	2				2
chr15	73864584	74363904	499	15qD3	0.018	0.341	127		0.8	0.065	2				2
chr2	14710180	14825201	115	2qA2	0.048	1	384		-0.9	0.579	1	1			2
chr14	23212889	23350017	137	14qA3	0.01	0.136	50	1700112E06Rik	-1.7	0.826	1	1			2
chr1	68452059	68962722	511	1qC3	0.005	0.092	37	Erbb4	-1.3	1	1	1			2
chr3	156168240	156326627	158	3qH4	0.008	0.126	20	Negr1	-1	0.416		2			2
chr16	66979484	67302336	323	16qC2	0.003	0	0	Cadm2	-0.8	1	1	1			2
chr9	96739498	97599236	860	9qE3.3	0.573	0.34	138	Clstn2	0.5	0.604		1		1	2
chr14	12657349	12726335	69	14qA1	1.768	1	692	Ptprg	1.2	0.815		2			2
chr16	97041506	97307131	266	16qC4	0.022	1	431	Dscam	-1.3	0.316	2				2
chr10	89667208	89923292	256	10qC2	0.05	1	793	Anks1b	-1.4	0.694		2			2
chr14	28878351	28910684	32	14qA3	0.104	1	882	Erc2	-0.9	1		2			2
chr3	128141257	128785939	645	3qG2-G3	0.022	0.309	187		-1.1	1	1	1			2
chr6	63397825	63872019	474	6qC1	0.004	0.065	31	Grid2	-0.9	0.248	1	1			2
chrX	69967118	70013398	46	XqA7.3	0.001	0	0		-0.4	0.799				2	2
chr9	28989538	29022098	33	9qA4	0.024	1	324	Ntm	-1.6	1	2				2
chr1	25406391	25729301	323	1qA5	0.002	0	0	Bai3	-1.3	0.613	2				2
chr17	63108554	63466468	358	17qE1.1	0.16	0.62	480		-0.4	0.168	1	1			2
chr2	178382089	179172258	790	2qH4	0.003	0.029	10		0	0.604		2			2
chr17	59643453	60460645	817	17qD-E1	0.001	0	0		-0.8	0.954		2			2
chr1	62048401	62126441	78	1qC2	0.022	0.539	405	Pard3b	-1	0.638	1	1			2
chr13	24350555	24368939	18	13qA3.1	1.181	1	317		0.1	1	1				1
chr11	48631490	48644547	13	11qB1.2	0.28	1	64		1.5	1		1			1
chr3	90258668	90270594	12	3qF1	0.476	0.908	37		1.2	1	1				1
chr1	194075147	194147642	72	1qH6	0.029	1	328		0.2	1	1				1
chr3	48843599	48905680	62	3qC	0.07	0.647	150		-0.9	1	1				1
chr12	80458096	80485813	28	12qC3	0.696	1	548	Rad51l1	0.7	1	1				1
chr12	51621984	51689779	68	12qB3	0.045	1	327		-1	1	1				1
chr4	50867810	50889069	21	4qB1	0.015	0.409	49		-0.7	1	1				1
chr16	6644407	6662001	18	16qA1	0.007	0	0		-1.1	1		1			1
chr5	138349102	138671596	322	5qG2	0.941	0.6	61		1.2	1				1	1
chr13	76692445	76729040	37	13qC1	0.007	0	0	Mctp1	-0.7	1		1			1
chr9	23836516	23878764	42	9qA3	0	0	0		-1.1	1				1	1
chr9	7107745	7151585	44	9qA1	0.352	1	367		-0.7	1		1			1
chr6	136176550	136188670	12	6qG1	0.002	0	0		0.4	1		1			1
chr8	104701738	105391003	689	8qD1-D2	0.013	0.178	120		-1.1	1	1				1
chr10	5387939	5399710	12	10qA1	0.001	0	0		-1.2	1				1	1
chr2	16573713	16589425	16	2qA3	0.686	1	486		-0.7	1	1				1
chr5	97686946	97715301	28	5qE3	0.002	0	0		-0.2	1	1				1
chr5	141968055	142086859	119	5qG2	0.018	0.408	299	Sdk1	-0.9	1	1				1
chr13	31697108	31714487	17	13qA3.2	0.007	0	0		-0.3	1		1			1
chr15	24275662	24293799	18	15qB1	0.003	0	0		-0.8	1			1		1
chr12	11685879	11704184	18	12qA1.1	0.104	1	593		-1.3	1		1			1
chr3	106897125	106946765	50	3qF2.3	0.004	0	0		-0.4	1	1				1
chrX	80614465	80737265	123	XqC1	0.002	0	0	Dmd	-0.8	1	1				1
chr4	20420876	20442664	22	4qA3	0.033	1	468	Nkain3	-1	1	1				1
chr17	78387952	78538071	150	17qE2	0.001	0	0		-1.2	1		1			1
chr1	9997352	10134699	137	1qA2	1.543	1	107		1	1				1	1
chr10	62618378	62631831	13	10qB4	0.014	0	0		1.8	1			1		1
chr9	45484247	45498103	14	9qA5.2	0.044	1	291		1.2	1		1			1
chr2	107592103	107612119	20	2qE3	0.001	0	0		-1	1		1			1
chr5	103067477	103084992	18	5qE5	0.001	0.058	87		-1.1	1		1			1
chr16	72790511	72808642	18	16qC3.1	0.62	1	385		-0.8	1	1				1
chr15	23179664	23233832	54	15qA2	0.015	0.117	79	Cdh18	-1.1	1	1				1
chr16	12161723	12470946	309	16qA1	0.001	0	0		-1.1	1		1			1
chr6	18282903	18297118	14	6qA2	0	0	0		-1	1				1	1
chr18	63515336	63529726	14	18qE1	0.059	1	388		-1	1		1			1
chr7	131872916	131919315	46	7qF3	0.001	0	0		-1.2	1		1			1
chr1	176482518	176538552	56	1qH3	0.161	1	344		-0.5	1		1			1
chr16	3554109	5471913	1918	16qA1	0.632	0.684	146		1.1	1		1			1
chr14	17518590	17545316	27	14qA2	0.001	0	0		-1.2	1				1	1
chr6	80586712	80738039	151	6qC3	0.001	0	0	Lrrtm4	-0.9	1		1			1
chr10	37398874	37537585	139	10qB1	0.024	0.343	76		-1.1	1			1		1
chr12	112922839	113024344	102	12qF1	0.492	1	55		1.5	1		1			1
chr4	74589416	74637997	49	4qC3	0.001	0	0		-1.3	1				1	1
chr12	44834824	44930182	95	12qB2	0.002	0	0		-0.9	1		1			1
chr6	61420361	61504354	84	6qB3	0.034	0.403	55	Fam190a	-1	1		1			1
chr12	58506633	58619384	113	12qC1	0.165	1	293		-0.3	1		1			1
chrX	92114965	92167350	52	XqC3	0.003	0	0		-0.4	1		1			1
chr5	122754194	122878196	124	5qF	1.166	0.927	98		1.7	1		1			1
chr10	46273780	46292240	18	10qB2	0.075	1	40		-0.5	1				1	1
chr14	102036173	102271657	235	14qE2.3	0.495	0.924	217		0.7	1	1				1
chr8	96529035	96544717	16	8qC5	1.888	1	46		1.9	1		1			1
chr6	78808424	78824667	16	6qC3	0.012	0.497	25		-1	1		1			1
chr2	167666995	167687942	21	2qH3	0.002	0	0		1.2	1		1			1
chrX	40283016	40333925	51	XqA4	0.007	0	0	Odz1	-0.8	1		1			1
chr8	30065145	30103676	39	8qA2-A3	0.023	0.649	25	Unc5d	-1.2	1		1			1
chr15	47200283	47213690	13	15qB3.3	0	0	0		-0.6	1	1				1
chr18	46054375	46073621	19	18qC	0.002	0	0		-0.9	1	1				1
chr19	5164221	5221793	58	19qA	0.548	1	155		1.7	1			1		1
chr2	48865893	48906035	40	2qC1.1	0.551	1	378		-0.7	1		1			1
chr2	151425565	151502568	77	2qG3	0.008	0	0		0.8	1	1				1
chr16	49789592	49803330	14	16qB5	0.002	0	0		-0.7	1		1			1
chr14	115642658	115729708	87	14qE4	0.011	0.148	165	Gpc5	-0.6	1	1				1
chr12	117971938	118020065	48	12qF2	0.026	1	311	Ptprn2	-0.9	1		1			1
chr16	75171029	75192434	21	16qC3.1	0.002	0	0		-0.9	1	1				1
chr7	82890105	82908338	18	7qD2	0.485	1	305		1.1	1		1			1
chr3	109381930	109394285	12	3qF3	0.069	1	350		-1.6	1		1			1
chr6	47600203	47717021	117	6qB2.3	0.007	1	189		1.5	1		1			1
chr5	67972695	67987769	15	5qC3.1	0.001	0	0		0.6	1				1	1
chr8	125214679	125243057	28	8qE1	0.047	1	72	AC114005.5	1.6	1	1				1
chr2	131776377	131795209	19	2qF2	0.029	0.378	48		1.2	1		1			1
chr5	15647071	15674594	28	5qA2	0.308	1	449		-1	1	1				1
chr4	89124448	89183187	59	4qC4	0.014	0.307	54		-0.4	1	1				1
chr14	119932853	120038872	106	14qE4	0.031	1	615	Hs6st3	-1.2	1		1			1
chr9	3007008	3030407	23	9qA1	0.144	1	40		NULL	1		1			1
chr2	55881843	55891903	10	2qC1.1	0.001	0	0		-1.1	1				1	1
chr6	97169220	98586781	1418	6qD3	0.081	0.448	333		0.2	1	1				1
chr11	101238492	101255048	17	11qD	0.002	0	0		1.4	1	1				1
chr3	55671093	55717375	46	3qC	0.101	1	561	Nbea	-1	1		1			1
chr3	152426409	152460095	34	3qH3	0.417	1	150		-0.5	1		1			1
chr12	115118957	115639014	520	12qF1-F2	0.001	0.04	21		-0.9	1	1				1
chr10	80075159	80091411	16	10qC1	0.926	1	67		1.4	1				1	1
chr1	128079798	128156481	77	1qE3	0.033	1	411	Nckap5	-1.4	1	1				1
chr3	13326166	13351529	25	3qA1	0.001	0	0		-0.8	1	1				1
chr2	165968458	165986929	18	2qH3	1.236	1	98		1.3	1		1			1
chr12	67807095	67871439	64	12qC2	0.001	0	0	Mdga2:2	-0.9	1		1			1
chr12	47274817	47292967	18	12qB3	0.044	1	139		-1.1	1		1			1
chr15	22334830	22363326	28	15qA2	0.001	0	0		-1.1	1		1			1
chr4	31232388	31251000	19	4qA5	0.001	0	0		-0.8	1	1				1
chr3	87727662	88124636	397	3qF1	1.006	0.589	55		1.3	1		1			1
chr7	142033468	142061673	28	7qF3	0.901	1	569	Dock1	-0.5	1		1			1
chr2	42190478	42269849	79	2qB	0.002	0	0	Lrp1b	-0.7	1	1				1
chr14	24415035	24430644	16	14qA3	0.007	0	0	Kcnma1	-0.9	1		1			1
chr6	75879924	75893261	13	6qC2	0.001	0	0		-1.1	1				1	1
chr17	85598764	85638852	40	17qE4	0.352	1	375		1	1		1			1
chr4	87656968	87670763	14	4qC4	0.227	1	267		-0.2	1	1				1
chr7	4996617	5013541	17	7qA1	0.726	1	17		1.3	1		1			1
chr2	32549956	32567435	17	2qB	1.37	1	99		1.3	1		1			1
chr3	18088699	18105084	16	3qA1	0.116	1	205		0.3	1				1	1
chr8	121188257	121281086	93	8qE1	0.05	1	541	Cdh13	-0.6	1		1			1
chr7	81573254	81581804	9	7qD2	0.076	1	292		-1.2	1		1			1
chr6	133531819	133711083	179	6qG1	0	0	0		-0.6	1	1				1
chr16	64660621	64744519	84	16qC1.3	0.021	0.668	82		0.6	1				1	1
chrX	126704715	126782733	78	XqE3	0.487	1	762	Diap2	-0.5	1		1			1
chr12	92280028	92312210	32	12qD3	0.216	1	457		-1.1	1		1			1
chr18	21584414	21708292	124	18qA2	0.017	0.485	55		-0.3	1		1			1
chr14	76042759	76238007	195	14qD3	0.566	0.566	58		1.4	1		1			1
chr1	160427658	160440947	13	1qH1	0.007	0	0		-1.7	1	1				1
chr17	52901703	52920558	19	17qC	0.217	1	349		-1.3	1		1			1
chr19	18057475	18069326	12	19qB	0	0	0		-1.2	1	1				1
chr11	25830034	25848504	18	11qA3.3	0.111	1	530	5730522E02Rik	0	1	1				1
chr13	77534187	77578973	45	13qC1	0.033	1	493		-1.3	1		1			1
chrX	84743823	84810886	67	XqC1	0.003	0	0	Il1rapl1	-0.5	1		1			1
chr7	148643338	148659657	16	7qF5	0.901	1	11		1.2	1		1			1
chr1	132122959	132138246	15	1qE4	0.004	0	0		-0.8	1		1			1
chr4	85639125	85767934	129	4qC4	0.06	1	540		0.6	1	1				1
chr10	27999433	28050889	51	10qA4	1.717	1	529	Ptprk	-0.6	1		1			1
chrX	97310623	97364809	54	XqC3	0.085	1	427		-0.8	1		1			1
chr4	110348031	110458844	111	4qD1	0.003	0	0	Agbl4	-1	1	1				1
chr16	28636597	30362785	1726	16qB2	0.288	0.405	245		0.8	1				1	1
chr17	68885960	68902564	17	17qE1.2	0.001	0	0	L3mbtl4	-1.2	1				1	1
chr10	106100370	106205166	105	10qD1	0.001	0	0		-0.9	1		1			1
chr13	74697908	74712639	15	13qC1	0.144	1	69		1.5	1		1			1
chr17	25504241	25544953	41	17qA3.3	0.024	0.871	60		1.2	1		1			1
chrX	58906451	59055706	149	XqA6	0.005	0	0		-0.4	1	1				1
chr8	75911161	75927923	17	8qC1	0.003	0	0		-1.3	1	1				1
chr3	86175725	86281122	105	3qF1	0.46	1	564	Lrba	-0.2	1		1			1
chr4	76764098	76782219	18	4qC3	0.001	0	0	Ptprd	-0.8	1		1			1
chr19	31180452	31534072	354	19qC1	0.012	0.099	56	Prkg1	-0.5	1	1				1
chr2	137627766	138830042	1202	2qF3	0.036	0.18	205		-1	1			1		1
chr7	10722963	11094588	372	7qA1	0.037	0.118	44		-1.1	1				1	1
chr11	115752933	115768154	15	11qE2	0.583	1	42		1.3	1	1				1
chr16	70455343	70477771	22	16qC2	0.264	1	258		-0.9	1	1				1
chr11	107461528	107475971	14	11qE1	2.801	1	151		1.4	1		1			1
chr1	119687591	119706562	19	1qE2.3	0	0	0		-1.1	1			1		1
