# Supplementary material for: Large transcription units unify copy number variants and common fragile sites arising under replication stress
Source: Genome Res. 2015 Feb;25(2):189–200. doi: 10.1101/gr.177121.114 (PMC4315293; doi:10.1101/gr.177121.114)
Supplement: Supplemental Material [file supp_gr.177121.114_Table_S3B.xlsx]

## Sheet: 090
											number_of_CNVs
chrom	start	end	size(Kb)	band	name	RPKM	txn_coverage	longest_txn_unit(Kb)	rep_timing	CNV_coverage	APH	HU	IR	NT	all
chr7	145813452	148118090	2305	7q35-36	CNTNAP2	0.001	0.002	5	G2(1.4)	0
chr9	8314245	10612723	2298	9p23-24	PTPRD	0.001	0.002	5	G2(1.2)	0
chrX	31115793	33357558	2242	Xp21.1-2	DMD	0.001	0.001	3	S4(1.6)	0
chr3	115521234	117716095	2195	3q13.31-32	LSAMP	0.186	1	2201	S3(2.5)	0.967	11	20	7	3	41
chr11	83166054	85338966	2173	11q14.1	DLG2	0.011	0.21	272	S4(2.2)	0
chr8	2792874	4852494	2060	8p23.2	CSMD1	0	0	0	G2(1.3)	0
chr20	13976014	16033842	2058	20p12.1	MACROD2	0.023	0.637	1311	S4(2.2)	0.046	2				2
chr6	64429875	66417118	1987	6q12	EYS	0.001	0.008	15	S4(1.6)	0
chr2	140988991	142889270	1900	2q22.1-2	LRP1B	0.001	0.002	3	S4(1.8)	0
chr10	55562530	57387702	1825	10q21.1	PCDH15	0.001	0	0	G2(1.2)	0.017		1			1
chr10	67672275	69455927	1784	10q21.3	CTNNA3	0.001	0	0	S4(1.8)	0
chr3	75955845	77699115	1743	3p12.3	ROBO2	0.033	0.577	1096	S4(1.9)	0.453	1	2	2		5
chr16	6069094	7763340	1694	16p13.3	RBFOX1	0	0	0	G2(1.4)	0
chr14	78708733	80330762	1622	14q24-31	NRXN3	0.004	0.064	98	S3(2.7)	0
chr5	58264864	59817947	1553	5q11-12	PDE4D	0.016	0.047	71	S3(2.9)	0.14	1	1			2
chr1	57460450	59012406	1552	1p32.1-2	DAB1	0.074	0.385	443	S3(2.7)	0
chr16	5289802	6826015	1536	16p13.3	RP11-420N3.2	0	0	0	S4(1.6)	0
chr3	59735035	61237133	1502	3p14.2	FHIT	0.002	0	0	S4(1.9)	0
chr1	48998526	50489585	1491	1p33	AGBL4	0	0.002	3	G2(1.4)	0
chr4	91048685	92523064	1474	4q22.1	CCSER1	0.001	0	0	G2(1.4)	0
chr4	93225549	94695707	1470	4q22.1-2	GRID2	0.001	0	0	G2(1.4)	0.411			1		1
chr13	92050928	93519490	1469	13q31.3	GPC5	0.001	0.003	5	S4(1.6)	0
chr2	79412356	80875905	1464	2p12	CTNNA2	0	0	0	S4(2)	0
chr7	77646392	79082890	1436	7q21.11	MAGI2	0.29	1	1475	S2(4.2)	0.464	3	1		1	5
chr2	115199875	116603328	1403	2q14.1	DPP10	0.001	0	0	G2(1.3)	0
chr6	161768451	163148803	1380	6q26	PARK2	0.024	0.564	779	S4(1.6)	0
chr2	51259738	52635055	1375	2p16.3	AC007682.1	0.001	0.003	4	S4(1.7)	0
chrX	28605515	29974840	1369	Xp21.2-3	IL1RAPL1	0.001	0	0	S4(2.1)	0.117	1				1
chr3	174156362	175523428	1367	3q26.31	NAALADL2	0.325	1	1371	S3(3.2)	0.168	2	1	1		4
chr11	40135752	41481323	1346	11p12	LRRC4C	0.001	0	0	G2(1.3)	0
chrX	37208582	38546928	1338	Xp11-21	TM4SF2	0.034	0.106	139	S3(2.9)	0
chr11	98891682	100229616	1338	11q22.1	CNTN5	0.001	0.002	3	S4(1.5)	0.998	1				1
chr10	52750944	54058110	1307	10q11-21	PRKG1	0.903	0.997	1046	S3(3.4)	0.557	2	3	1	1	7
chr3	17198653	18486309	1288	3p24.3	TBC1D5	0.265	0.543	599	S3(2.5)	0
chr12	99120234	100378432	1258	12q23.1	ANKS1B	0.004	0.079	122	S4(2.2)	0.12		1			1
chr4	172733404	173962710	1229	4q34.1	GALNTL6	0.001	0.005	6	S4(1.7)	0
chr4	20730238	21950422	1220	4p15.2-31	KCNIP4	0.006	0.157	191	S4(2.1)	0
chr21	36160097	37376965	1217	21q22.12	RUNX1	0.693	0.292	269	S1(4.8)	0.095		1			1
chr8	113235156	114449328	1214	8q23.3	CSMD3	0.001	0.004	5	G2(1.3)	0
chrX	103810995	105011822	1201	Xq22.3	IL1RAPL2	0	0	0	S4(1.9)	0
chr7	69063904	70258054	1194	7q11.22	AUTS2	1.476	1	1220	S4(1.6)	0.999	6	5	8		19
chr18	49866541	51057784	1191	18q21.2	DCC	0.001	0.003	3	G2(1.4)	0
chr13	93879094	95059655	1181	13q31-32	GPC6	0.278	1	1204	S3(3.3)	0.247		1			1
chr3	78646389	79816965	1171	3p12.2-3	ROBO1	0.179	0.374	432	S3(2.6)	0
chr16	82660407	83830204	1170	16q23.3	CDH13	0.855	1	1171	S3(3.2)	0.223	1	1	1		3
chr2	212240445	213403565	1163	2q34	ERBB4	0.072	1	1163	S4(1.7)	0.254	1				1
chr17	31340104	32501983	1162	17q11-12	ASIC2	0.001	0.004	5	S4(2.4)	0
chr8	13947372	15095848	1148	8p22	SGCZ	0	0	0	S4(1.9)	0
chr2	214149112	215275225	1126	2q34	SPAG16	0.04	0.287	175	S3(2.5)	0
chr8	31496901	32622548	1126	8p12	NRG1	0.612	0.193	218	S2(3.7)	0
chr11	132284870	133402414	1118	11q25	OPCML	0.366	0.473	543	S3(2.5)	0
chr20	40701391	41818610	1117	20q12-13	PTPRT	0.001	0	0	S4(1.7)	0
chr3	85008131	86123579	1115	3p12.1	CADM2	0.001	0	0	G2(1.2)	0
chr2	50145642	51259674	1114	2p16.3	NRXN1	0	0.003	3	S4(1.7)	0
chr16	78133309	79246564	1113	16q23.1-2	WWOX	0.035	0.791	881	S4(1.7)	0.669	6		2	1	9
chr10	83635069	84746935	1112	10q23.1	NRG3	0	0	0	G2(1.3)	0
chr5	19473059	20575982	1103	5p14.3	CDH18	0.001	0	0	S4(1.7)	0
chr5	21750781	22853731	1103	5p14.3	CDH12	0.001	0	0	G2(1.3)	0
chr7	153584181	154685995	1102	7q36.2	DPP6	0	0	0	S4(1.5)	0
chr2	205410515	206484886	1074	2q33.3	PARD3B	0.542	1	1081	S3(3.3)	0.536	1	1	1		3
chr7	157331749	158380480	1049	7q36.3	PTPRN2	0	0	0	S3(2.7)	0
chrX	22277913	23311263	1033	Xp22.11	RP11-40F8.2	0.001	0	0	S4(2.2)	0
chr6	124125285	125146803	1022	6q22.31	NKAIN2	0.001	0	0	S4(1.7)	0
chr5	103718998	104728671	1010	5q21.2-3	RP11-6N13.1	0.001	0.009	6	G2(1.4)	0
chr9	119187503	120177348	990	9q33.1	ASTN2	0.041	0.275	297	S3(2.7)	0
chr1	6845383	7829766	984	1p36.23-31	CAMTA1	0.1	0.139	137	S2(4.2)	0
chr5	166711803	167691162	979	5q34	TENM2	0.626	0.706	700	S3(3)	0
chr3	6811687	7783215	972	3p26.1	GRM7	0	0	0	G2(1.3)	0
chr7	3341079	4308632	968	7p22.2	SDK1	0	0	0	S4(2.1)	0
chr11	131240372	132206716	966	11q25	NTM	0.255	0.482	435	S2(3.9)	0
chr3	55542335	56502391	960	3p14.3	ERC2	0.001	0	0	S3(3.2)	0
chr4	98105243	99064391	959	4q22-23	STPG2	0.006	0	0	S4(1.8)	0
chr3	2140496	3099645	959	3p26.2-3	CNTN4	0	0	0	G2(1.3)	0
chr10	77360997	78319925	959	10q22.2-3	C10orf11	0.009	0.076	91	S3(2.9)	0
chr18	3496029	4455335	959	18p11.31	DLGAP1	0.007	0.108	79	S2(3.5)	0
chr3	21459914	22414812	955	3p24.3	ZNF385D	0.268	0.349	338	S4(1.9)	0
chr3	54156573	55108584	952	3p14-21	CACNA2D3	0.001	0	0	S3(3.1)	0
chr3	96533424	97471304	938	3q11.2	EPHA6	0.001	0	0	G2(1.4)	0
chr3	158680023	159615155	935	3q25.32-33	IQCJ-SCHIP1	0.492	0.199	188	S1(4.6)	0
chr5	10971951	11904155	932	5p15.2	CTNND2	0	0	0	S4(2.1)	0
chr13	66876966	67804468	928	13q21.32	PCDH9	0.048	0.869	745	S3(2.5)	0
chrX	95939661	96859996	920	Xq21.33	DIAPH2	0.277	1	949	S4(2.2)	0.058		1			1
chr4	54243809	55161439	918	4q12	FIP1L1	0.646	0.258	106	S1(5.3)	0
chr9	73143978	74061820	918	9q21.12-13	TRPM3	0.001	0.01	9	S3(3.3)	0
chr7	18126571	19042039	915	7p21.1	HDAC9	0.159	0.553	509	S2(3.7)	0
chr2	137523114	138435287	912	2q22.1	THSD7B	0.004	0	0	G2(1.4)	0
chr14	68286495	69196935	910	14q24.1	RAD51B	0.123	0.882	807	S1(5.2)	1				1	1
chr11	20691116	21597227	906	11p15.1	NELL1	0.001	0	0	G2(1.4)	0
chr7	110303109	111202573	899	7q31.1	IMMP2L	0.098	1	929	S4(2.4)	0.111	3				3
chr2	133429373	134326034	897	2q21.2	NCKAP5	0.156	1	1004	S2(4.2)	0
chr5	155297353	156194799	897	5q33.2-3	SGCD	0.554	0.992	978	S4(2.3)	0.122			1		1
chr2	124782863	125672864	890	2q14.3	CNTNAP5	0	0	0	G2(1.4)	0
chr3	173114073	174004434	890	3q26.31	NLGN1	1.034	1	937	S3(2.7)	0
chr1	71861622	72748417	887	1p31.1	NEGR1	0.454	1	914	S4(2)	0.732	6	1			7
chr15	86685226	87572283	887	15q25.3	AGBL1	0	0	0	S4(1.6)	0
chr8	50822348	51706678	884	8q11.21	SNTG1	0.001	0	0	S4(2.2)	0
chr2	59445814	60327335	882	2p16.1	RP11-444A22.1	0	0	0	G2(1.4)	0
chr4	62066975	62944053	877	4q13.1	LPHN3	0.001	0	0	G2(1.3)	0
chr5	163723701	164598649	875	5q34	CTC-340A15.2	0	0	0	G2(1.4)	0
chr14	33404138	34273382	869	14q13.1	NPAS3	0.018	0.69	490	S4(2.2)	0
chr8	100025493	100889808	864	8q22.2	VPS13B	1.31	1	872	S2(3.6)	0.127		1			1
chr4	164445449	165305202	860	4q32.2-3	2014-03-01	0.001	0.003	3	G2(1.4)	0
chr12	86372515	87232681	860	12q21.31-32	MGAT4C	0.001	0.008	7	S4(1.8)	0
chr10	116853123	117708503	855	10q25.3	ATRNL1	0.002	0.023	20	S4(2.3)	0
chr10	23983674	24836772	853	10p12.1-2	KIAA1217	0.091	0.398	346	S3(2.7)	0
chr3	180707557	181554668	847	3q26.33	SOX2-OT	0.005	0	0	G2(1.4)	0
chr2	76974844	77820445	846	2p12	LRRTM4	0.001	0	0	G2(1.2)	0
chrX	91034259	91878229	844	Xq21.31-32	PCDH11X	0	0	0	G2(1.3)	0
chr1	97543298	98386605	843	1p21.3	DPYD	1.577	1	868	S2(4)	0.02				1	1
chr18	7566779	8406859	840	18p11.23	PTPRM	0.831	0.999	845	S3(2.8)	0.022			1		1
chr11	81590892	82429124	838	11q14.1	RP11-179A16.1	0.001	0	0	S4(1.8)	0
chr21	41382925	42219065	836	21q22.2	DSCAM	0	0	0	S4(1.5)	0
chr1	174128547	174964445	836	1q25.1	RABGAP1L	0.508	1	840	S3(2.5)	0.117	1		1		2
chr20	8112823	8949003	836	20p12.3	PLCB1	0.345	0.991	829	S2(4.3)	0
chr14	47308825	48144157	835	14q21.3	MDGA2	0.001	0	0	G2(1.4)	0.104			1		1
chr12	129556269	130388211	832	12q24.33	TMEM132D	0	0	0	S4(1.6)	0
chr7	14184673	15014402	830	7p21.2	DGKB	0.006	0.14	116	S4(1.8)	0
chr8	105602960	106431488	829	8q22-23	RP11-127H5.1	0.167	0.149	507	S2(4.3)	0.279			1		1
chr4	142944312	143768585	824	4q31.21	INPP4B	0.767	0.999	847	S2(3.5)	0
chr10	13685705	14504141	818	10p13	FRMD4A	0.143	0.447	381	S1(5)	0
chr7	126078651	126893348	815	7q31.33	GRM8	0.001	0.01	8	S4(1.5)	0
chr7	132937828	133751342	814	7q33	EXOC4	0.67	1	875	S4(2.4)	0.438	1				1
chr3	114056940	114866118	809	3q13.31	ZBTB20	0.754	1	831	S2(4.2)	0.319			1		1
chr1	215796235	216596738	801	1q41	USH2A	0.002	0	0	S3(3.1)	0
chr1	237205504	237997288	792	1q43	RYR2	0.002	0.011	6	G2(1.4)	0
chr11	78363875	79151992	788	11q14.1	TENM4	0.145	1	790	S2(3.6)	0
chr4	162305048	163085187	780	4q32.2	FSTL5	0.001	0.01	8	G2(1.4)	0
chr10	100218874	100995619	777	10q24.2	HPSE2	0.001	0	0	S3(3.3)	0
chr11	15987994	16761138	773	11p15.1-2	SOX6	0.002	0.047	38	S3(2.8)	0
chr11	19372270	20143144	771	11p15.1	NAV2	1.969	1	847	S1(5)	0
chr10	78629358	79398353	769	10q22.3	KCNMA1	0.629	0.999	787	S1(5.1)	0.38				1	1
chr10	87359311	88126250	767	10q23.1-2	GRID1	0.041	0.927	711	S4(2.3)	0
chr3	3742497	4508965	766	3p26.1-2	SUMF1	0.082	0.761	584	S4(1.6)	0
chr22	33558211	34318829	761	22q12.3	LARGE	0.353	0.972	739	S4(2)	0
chr1	245912641	246670614	758	1q44	SMYD3	1.336	1	832	S2(3.6)	0.491	1	1	1		3
chr8	104512975	105268322	755	8q22.3	RIMS2	0.024	0.851	643	S3(3.1)	0
chr6	69345258	70099403	754	6q12-13	BAI3	0.001	0	0	G2(1.3)	0
chr3	131252398	132004254	752	3q22.1	CPNE4	0.003	0.04	22	S3(2.7)	0
chr8	63161149	63912211	751	8q12.3	NKAIN3	0	0.005	4	S4(1.7)	0
chr4	151185593	151936879	751	4q31.3	LRBA	0.255	1	759	S2(3.9)	0
chr2	21444046	22193831	750	2p24.1	AC067959.1	0	0	0	S3(2.5)	0
chr8	87878669	88627447	749	8q21.3	CNBD1	0	0	0	S4(1.5)	0
chr7	90095737	90839905	744	7q21.13	CDK14	1.364	0.905	668	S2(3.8)	0
chr13	96743092	97485671	743	13q32.1	HS6ST3	0.001	0	0	S4(2.2)	0
chrY	4868266	5610265	742	Yp11.2	PCDH11Y	0	0	0	NULL	0
chr15	60780482	61521518	741	15q22.2	RORA	0.261	1	752	S2(4)	0
chr8	85095021	85834079	739	8q21.2	RALYL	0.001	0	0	G2(1.3)	0
chr3	187871071	188608460	737	3q27-28	LPP	2.109	1	828	S1(4.7)	0.392			1		1
chr3	61547242	62283288	736	3p14.2	PTPRG	0.842	1	758	S4(2.4)	0
chr13	35516423	36247159	731	13q13.3	NBEA	0.253	1	736	S3(2.7)	0.014		1			1
chr2	11988747	12718474	730	2p24-25	AC096559.1	0.001	0	0	S2(4.1)	0
chr2	29415639	30144432	729	2p23.1-2	ALK	0	0.01	7	S3(3.2)	0
chr3	29322472	30051886	729	3p24.1	RBMS3	4.162	1	789	S2(4)	0
chr8	140742585	141468678	726	8q24.3	TRAPPC9	0.147	0.996	738	S2(3.6)	1	1	1			2
chr7	40174574	40900362	726	7p14.1	C7orf10	0.226	1	940	S2(4.1)	0
chr9	27948075	28670283	722	9p21.1-2	LINGO2	0.001	0	0	G2(1.3)	0
chr12	2079951	2802108	722	12p13.33	CACNA1C	0.746	0.887	662	S1(4.9)	0
chr3	41288089	42003922	716	3p22.1	ULK4	0.216	1	768	S3(3)	0
chr17	58754813	59470199	715	17q23.2	BCAS3	0.293	1	722	S1(5.1)	0.121			1		1
chr3	50712671	51421629	709	3p21.2	DOCK3	0.025	0.793	524	S3(3.4)	0
chr10	61786055	62493248	707	10q21.2	ANK3	0.018	0.389	281	S2(4)	0
chr2	63348517	64054977	706	2p15	WDPCP	0.248	1	722	S2(4)	0
chr10	34398487	35104253	706	10p11.21-22	PARD3	0.713	0.999	709	S2(3.9)	0
chr22	28374003	29075853	702	22q12.1	TTC28	0.832	1	706	S1(4.7)	0
chr13	78493823	79191463	698	13q22-31	RNF219-AS1	0	0	0	S4(2.4)	0
chr6	20534687	21232635	698	6p22.3	CDKAL1	0.432	1	713	S3(2.8)	0.003		1			1
chr13	107820882	108519083	698	13q33.3	FAM155A	0.02	0.908	634	S3(2.5)	0
chr2	13850655	14541087	690	2p24.3	LINC00276	0.001	0	0	S4(1.6)	0
chr20	59827481	60515673	688	20q13.33	CDH4	0.101	0.999	689	S3(2.8)	0
chr1	81771844	82458120	686	1p31.1	LPHN2	0.632	0.394	253	S3(2.6)	0
chr15	71389290	72075722	686	15q23	THSD4	0.175	0.973	690	S1(5.2)	0
chr3	65339199	66024509	685	3p14.1	MAGI1	2.849	1	748	S2(3.9)	0.439			1	1	2
chrX	85403461	86087607	684	Xq21.2	DACH2	0	0	0	G2(1.3)	0
chr13	102372133	103054124	682	13q33.1	FGF14	0	0	0	S3(2.6)	0
chr8	64599736	65281115	681	8q12.3	RP11-32K4.1	0.001	0	0	G2(1.3)	0
chr2	143848930	144525921	677	2q22.2-3	ARHGAP15	0	0	0	S3(3)	0
chr14	66974124	67648520	674	14q23.3	GPHN	0.317	0.999	682	S2(3.7)	0
chr6	101846663	102517958	671	6q16.3	GRIK2	0.002	0	0	S3(2.6)	0.285	1				1
chr5	95297704	95966789	669	5q15	CTD-2337A12.1	0.168	1	824	S1(5.4)	0.266		2			2
chr7	71244475	71912136	668	7q11.22	CALN1	0	0	0	S4(1.8)	0.044			1		1
chr11	89984399	90648220	664	11q14.3	DISC1FP1	0.004	0.006	4	G2(1.4)	0
chr4	102332442	102995969	664	4q24	BANK1	0.01	0.43	289	S3(3)	0
chr3	134316642	134979309	663	3q22.2	EPHB1	0.056	0.727	472	S3(3.3)	0
chr3	7994491	8653610	659	3p26.1	LMCD1-AS1	0.017	0.41	270	S2(3.7)	0
chr6	165740775	166400091	659	6q27	PDE10A	0.001	0	0	S4(1.8)	0
chr4	183065139	183724177	659	4q34-35	TENM3	1.163	0.999	683	S3(3.3)	0
chr10	128593977	129250781	657	10q26.2	DOCK1	0.806	0.999	679	S3(2.5)	0
chr13	25946208	26599989	654	13q12.13	ATP8A2	0	0	0	S4(2.2)	0.011			1		1
chr1	33979608	34631443	652	1p34-35	CSMD2	0.793	0.999	652	S3(3.4)	0.263	1				1
chr11	70313960	70963623	650	11q13.3-4	SHANK2	0.045	1	653	S3(2.8)	0
chr2	72403112	73053170	650	2p13.2	EXOC6B	0.911	1	671	S2(3.7)	0
chr2	65663844	66311773	648	2p14	AC074391.1	0.019	0.311	202	S2(3.6)	0
chr3	123798869	124445172	646	3q21.1-2	KALRN	0.005	0	0	S1(4.7)	0.435		1			1
chr3	139654026	140296239	642	3q23	CLSTN2	0	0	0	S4(1.5)	0
chr13	50656306	51297372	641	13q14.2-3	DLEU1	0.057	1	736	S2(3.7)	0
chr5	168088744	168728133	639	5q34-35	SLIT3	1.357	1	677	S3(2.7)	0
chr2	236402732	237040444	638	2q37.2	AGAP1	0.507	1	651	S3(2.6)	0
chr2	58654933	59290901	636	2p16.1	AC007092.1	0	0	0	S4(2.3)	0
chr1	216676587	217311097	635	1q41	ESRRG	0	0	0	S4(2.2)	0
chr5	89825160	90460038	635	5q14.3	GPR98	0.001	0.007	59	S3(3)	0
chr6	129204341	129837714	633	6q22.33	LAMA2	0.453	1	643	S2(4.2)	0
chr14	72399155	73030654	631	14q24.2	RGS6	0	0	0	S2(4.2)	0
chr3	71003843	71633140	629	3p13	FOXP1	1.404	0.997	639	S1(4.7)	0.6		1			1
chr3	191857183	192485553	628	3q28-29	FGF12	0.005	0.062	190	S4(1.9)	0
chr4	81256873	81884910	628	4q21.21	C4orf22	0.593	1	766	S2(4.1)	0
chr10	106400858	107024993	624	10q25.1	SORCS3	0	0	0	S4(2.1)	0
chr5	136310986	136934068	623	5q31.2	SPOCK1	1.382	0.84	575	S3(3.1)	0.163			1		1
chr6	1624040	2245926	622	6p25.3	GMDS	0.25	0.999	624	S2(3.5)	0
chr6	74779166	75400443	621	6q13	RP11-554D15.1	0.022	0.731	454	S2(4.1)	0
chr4	82347546	82965397	618	4q21.21-22	RASGEF1B	0.001	0.011	7	S4(2.3)	0
chr8	24153326	24769586	616	8p21.2	RP11-624C23.1	0.001	0	0	S3(3)	0
chr15	54305100	54920806	616	15q21.3	UNC13C	0	0	0	S4(1.5)	0
chr14	30045686	30661104	615	14q12	PRKD1	0.942	1	629	S3(3.4)	0.486			1		1
chr6	9596342	10211841	615	6p24.3	OFCC1	0	0	0	S3(2.8)	0.483			1		1
chr13	109248499	109860355	612	13q33.3	MYO16	0.001	0	0	S3(3)	0
chr7	113726381	114333827	607	7q31.1	FOXP2	0.043	1	624	S4(2.2)	0
chr6	62389864	62996132	606	6q11.1	KHDRBS2	0	0	0	G2(1.2)	0
chr8	96216683	96822364	606	8q22.1	KB-1047C11.2	0.002	0	0	S2(3.5)	0
chr5	151998524	152603103	605	5q33.1	AC091969.1	0	0	0	S4(1.6)	0
chr7	13141015	13743774	603	7p21.3	AC011288.2	0.005	0	0	S3(2.5)	0
chr2	164606082	165208733	603	2q24.3	AC092684.1	0.001	0	0	S4(1.9)	0
chr1	61330930	61928465	598	1p31.3	NFIA	0.436	0.646	394	S3(2.6)	0
chr16	12070593	12668146	598	16p13.12-13	SNX29	0.634	1	611	S2(4.1)	0
chr2	22156207	22753977	598	2p24.1	AC068490.2	0	0	0	S4(1.8)	0
chr2	100162322	100759201	597	2q11.2	AFF3	0.027	0.898	542	S2(4.3)	0
chr3	153102722	153697975	595	3q25.2	RP11-23D24.2	0.001	0	0	S3(2.6)	0
chr7	36893960	37488852	595	7p14.1-2	ELMO1	0.001	0	0	S4(1.6)	0
chr18	36786887	37380282	593	18q12.2-3	LINC00669	0.109	1	636	S4(1.7)	0
chr10	108333420	108924292	591	10q25.1	SORCS1	0	0	0	S4(1.8)	0
chr2	33931952	34522820	591	2p22.3	AC009499.1	0	0	0	S3(2.6)	0
chrX	137713734	138304939	591	Xq26-27	FGF13	0.182	0.971	620	G2(1.4)	0
chr15	47476297	48066420	590	15q21.1	SEMA6D	0.001	0	0	S3(3.1)	0
chr1	240931553	241520530	589	1q43	RGS7	0.033	0.594	300	S2(3.7)	0
chr6	163148163	163736524	588	6q26	PACRG	0.003	0	0	S4(2)	0
chrX	123509752	124097666	588	Xq25	TENM1	0	0	0	G2(1.3)	0
chr12	79257772	79845788	588	12q21.2	SYT1	0.14	0.999	590	S2(3.6)	0
chr10	19492778	20079330	587	10p12.31	C10orf112	0.001	0	0	S4(2)	0
chr14	27727922	28314492	587	14q12	CTD-3006G17.2	0.001	0	0	G2(1.3)	0.037		1			1
chrX	12156584	12742642	586	Xp22.2	FRMPD4	0.001	0	0	S3(3)	0
chr11	24518515	25104150	586	11p14.3	LUZP2	0.001	0	0	S4(1.5)	0
chr1	70034080	70617628	584	1p31.1	LRRC7	0.001	0	0	S3(2.7)	0
chr5	88179144	88762215	583	5q14.3	MEF2C-AS1	0.004	0.067	37	S3(2.7)	0
chr6	98264584	98847748	583	6q16.1	RP11-436D23.1	0.001	0	0	G2(1.3)	0
chr3	142984063	143567373	583	3q24	SLC9A9	0.035	1	589	S3(2.6)	0
chr1	66258196	66840259	582	1p31.3	PDE4B	1.298	0.999	593	S2(4.4)	0
chr2	154728425	155310361	582	2q23-24	GALNT13	0.001	0	0	G2(1.3)	0
chr3	167967309	168548387	581	3q26.2	EGFEM1P	0.001	0	0	S4(2.2)	0
chr5	94039445	94620279	581	5q15	MCTP1	0.001	0	0	S3(2.6)	0.288				1	1
chr7	70597154	71178585	581	7q11.22	WBSCR17	0	0	0	S4(1.5)	1			4		4
chr7	103969103	104549001	580	7q22.2-3	LHFPL3	0.001	0.007	4	S2(3.9)	0
chr3	168801286	169381406	580	3q26.2	MECOM	0.009	0.116	84	S3(2.9)	0
chr11	126293253	126873355	580	11q24.2	KIRREL3	2.046	1	588	S2(4.4)	0.292		2			2
chr4	86936275	87515284	579	4q21.3	MAPK10	0.006	0	0	S2(3.7)	0
chr7	88388681	88966346	578	7q21.13	ZNF804B	0.001	0	0	G2(1.3)	0
chr12	72481045	73059422	578	12q21.1	TRHDE	0.077	0.679	416	S3(2.8)	0
chr6	73331519	73908574	577	6q13	KCNQ5	2.436	1	594	S1(4.5)	0.793		1			1
chr1	171810620	172387606	577	1q24.3	DNM3	0.128	1	579	S1(4.5)	0
chr2	188577542	189152418	575	2q32.1	AC068718.1	0.001	0	0	S2(3.7)	0
chr13	43787653	44361044	573	13q14.11	ENOX1	0.197	1	579	S2(4.1)	0
chr5	65892175	66465423	573	5q12.3	MAST4	0.135	0.368	221	S3(3.1)	0
chr6	12717892	13288645	571	6p24.1	PHACTR1	0.03	0.811	334	S3(3.2)	0
chr12	62102039	62672931	571	12q14.1	FAM19A2	0.006	0.11	63	S4(2.1)	0.043				1	1
chr3	177990719	178562217	571	3q26.32	KCNMB2	0.001	0	0	S3(3.1)	0
chr6	44777053	45345690	569	6p21.1	SUPT3H	0.239	1	581	S2(3.5)	0
chr7	121958480	122526813	568	7q31.32	CADPS2	0.02	0.896	509	G2(1.4)	0
chr6	144606836	145174170	567	6q24.2	UTRN	2.274	1	583	S2(4.1)	0
chr4	113739264	114304896	566	4q25-26	ANK2	0.162	1	589	S2(3.7)	0
chr15	27216428	27778373	562	15q12	GABRG3	0	0	0	S4(1.5)	0
chr15	39157522	39719396	562	15q14	RP11-624L4.1	0.131	1	590	S1(5.4)	0
chr11	88237743	88799113	561	11q14.2-3	GRM5	0.001	0	0	S2(3.5)	0
chr8	35092974	35654068	561	8p12	UNC5D	0.001	0	0	G2(1.3)	0
chr2	162280842	162841792	561	2q24.2	SLC4A10	0.001	0	0	S3(3.2)	0
chr14	46410145	46971026	561	14q21.2	LINC00871	0	0	0	G2(1.4)	0
chr1	76540403	77100286	560	1p31.1	ST6GALNAC3	0	0	0	S4(2.1)	0
chr10	75910959	76469061	558	10q22.2	ADK	1.304	0.993	538	S1(4.8)	0
chr15	76640525	77197785	557	15q24.3	SCAPER	0.321	1	560	S2(4.1)	0
chr8	18384810	18942240	557	8p22	PSD3	3.887	1	611	S2(4.3)	0.311			1		1
chr21	17442841	17999716	557	21q21.1	LINC00478	0.144	0.921	513	S3(2.9)	0
chr17	63631655	64188202	557	17q24.1	CEP112	0.403	1	611	S1(4.5)	0
chr15	33603162	34158303	555	15q14	RYR3	0	0	0	S2(3.6)	0
chr1	245318286	245872733	554	1q44	KIF26B	0.051	0.996	555	S2(3.5)	0.78		2	1		3
chr12	44229769	44783545	554	12q12	TMEM117	0.467	0.999	565	S3(2.7)	0
chr3	117723665	118276515	553	3q13.32	RP11-384F7.1	0.001	0	0	S4(2.2)	0.9		1			1
chr10	1228072	1779670	552	10p15.3	ADARB2	0	0	0	S3(2.8)	0
chr6	128289923	128841870	552	6q22.33	PTPRK	1.266	0.999	574	S2(3.8)	0
chr2	187867946	188419390	551	2q32.1	AC007319.1	0.215	1	553	S3(3.4)	0
chr9	126141932	126692431	550	9q33.3	DENND1A	0.472	1	553	S2(3.8)	0.223		1			1
chr6	21665002	22214734	550	6p22.3	CASC15	0.009	0.32	176	S3(3.2)	0
chr3	183852825	184402546	550	3q27.1	EIF2B5	0.363	0.403	84	S1(4.9)	0
chr4	7194264	7744554	550	4p16.1	SORCS2	0.113	1	562	S2(4.1)	0
chr7	31790792	32338941	548	7p14.3	PDE1C	2.411	0.601	501	S2(4.1)	0.205				1	1
chrX	11136238	11683821	548	Xp22.2	ARHGAP6	0.155	0.999	554	S2(3.5)	0
chr22	32908538	33454358	546	22q12.3	SYN3	0.004	0.046	22	S1(4.7)	0
chr21	22370632	22915650	545	21q21.1	NCAM2	0.015	0.598	327	S4(1.7)	0
chr4	150273168	150817385	544	4q31.23	RP11-526A4.1	0.021	0.963	524	S2(3.5)	0
chr15	58245621	58790065	544	15q21.3	ALDH1A2	0.01	0.231	91	S2(4.4)	0
chr11	92085261	92629618	544	11q14.3	FAT3	0.193	1	671	S3(2.7)	0
chr7	32535037	33078516	543	7p14.3	AVL9	0.359	0.647	167	S1(4.7)	0
chr14	89878655	90421003	542	14q32.11	RP11-33N16.3	0.328	0.688	479	S1(4.8)	0.306			1		1
chr2	1792884	2335032	542	2p25.3	MYT1L	0.001	0	0	S3(2.9)	0
chr3	68053358	68594776	541	3p14.1	FAM19A1	0.001	0.006	3	S4(1.7)	0
chr8	99413630	99955055	541	8q22.2	STK3	0.721	1	558	S1(4.9)	0.035		1			1
chr11	30851915	31391357	539	11p13-14	DCDC1	0.002	0.013	7	S4(1.6)	0
chr14	34393436	34931980	539	14q13.1	EGLN3	0.062	0.062	34	S2(3.5)	0
chr7	83585092	84122040	537	7q21.11	SEMA3A	5.027	1	588	S1(4.5)	0.044		1			1
chr2	45878483	46415129	537	2p21	PRKCE	0.616	1	551	S1(5)	0
chr18	24235705	24770662	535	18q11.2	AQP4-AS1	0	0	0	S4(1.5)	0
chr18	39739246	40271387	532	18q12.3	LINC00907	0.006	0.049	231	S4(1.9)	0
chr17	49707673	50237377	530	17q21-22	CA10	0	0	0	S4(1.6)	0
chr1	41972035	42501596	530	1p34.2	HIVEP3	0.16	1	532	S1(4.8)	0
chr1	239549864	240078750	529	1q43	CHRM3	0	0	0	S3(2.8)	0
chr17	77085426	77613550	528	17q25.3	RBFOX3	0	0.009	5	S2(4)	0
chr4	86396266	86923823	528	4q21.23-3	ARHGAP24	1.499	1	643	S2(3.6)	0
chr7	28338939	28865511	527	7p14-15	CREB5	0.14	0.79	421	S2(3.6)	0
chr7	34386123	34911194	525	7p14.3	NPSR1-AS1	0.001	0	0	S3(2.5)	0
chr7	131808090	132333447	525	7q32.3	PLXNA4	0.021	0.86	452	S3(2.5)	0
chr9	3824126	4348392	524	9p24.2	GLIS3	1.339	1	547	S1(4.6)	0
chr5	107194735	107717799	523	5q21.3	FBXL17	0.517	0.999	535	S3(2.5)	0
chr20	51588945	52111869	523	20q13.2	TSHZ2	0.257	1	525	S3(3.1)	0
chr1	50905149	51425935	521	1p32.3	FAF1	1.061	1	551	S2(3.5)	0
chr1	14925199	15444539	519	1p36.21	KAZN	0.202	0.374	195	S3(3)	0
chr7	103112230	103629963	518	7q22.1	RELN	0.01	0.321	169	S2(3.8)	0
chr14	53635771	54153976	518	14q22.1-2	AL163953.3	0.058	0.854	443	S2(4.3)	0
chr3	120626918	121143608	517	3q13.33	STXBP5L	0.001	0	0	S3(2.7)	0
chr12	117890816	118406788	516	12q24.22-23	KSR2	0.001	0.01	5	S3(2.6)	0
chr6	152442818	152958936	516	6q25.1-2	SYNE1	1.094	0.999	553	S3(3)	0
chr11	9800213	10315754	516	11p15.4	SBF2	1.475	1	535	S1(5.4)	0
chr2	109745803	110262207	516	2q12-13	SH3RF3	0.246	1	523	S1(5.1)	0
chr6	72596405	73112845	516	6q13	RIMS1	0.673	1	865	S2(3.6)	0
chr7	39017597	39532694	515	7p14.1	POU6F2	0	0.006	3	S2(3.7)	0
chr2	145425533	145940216	515	2q22.3	TEX41	0.001	0	0	S2(3.5)	0
chr2	40324409	40838193	514	2p22.1	SLC8A1	2.211	0.691	369	S2(4.3)	0
chr18	72265105	72777627	513	18q22.3	ZNF407	0.756	1	515	S3(2.8)	0
chr6	5261276	5771813	511	6p25.1	FARS2	0.555	1	534	S3(2.7)	0
chr5	9035137	9546187	511	5p15.31	SEMA5A	1.465	0.999	516	S1(4.5)	0.455		1			1
chr20	19193289	19703581	510	20p11.23	SLC24A3	0	0	0	S2(3.5)	0.005			1		1
chr7	76139744	76648340	509	7q11.23	UPK3B	0.038	0.536	389	S1(4.8)	0
chr9	15552894	16061661	509	9p22.3	CCDC171	0.064	0.914	465	S2(4.4)	0
chr17	64298753	64806861	508	17q24.2	PRKCA	1.356	1	518	S1(4.9)	0
chr4	97231851	97740015	508	4q22.3	RP11-145G20.1	0	0	0	G2(1.3)	0
chr12	1099674	1605099	505	12p13.33	ERC1	1.439	0.998	539	S1(5.3)	0.723		2			2
chr8	97657454	98161882	504	8q22.1	CPQ	0.416	1	565	S2(4.1)	0
chr18	30517365	31021065	504	18q12.1	CCDC178	0.001	0	0	G2(1.4)	0
chr1	225083963	225586996	503	1q42.12	DNAH14	0.159	0.933	483	S2(3.7)	0
chr14	32798478	33300567	502	14q12-13	AKAP6	0.101	0.878	493	S2(3.5)	0
chr6	114290864	114792869	502	6q21-22	RP3-399L15.3	0.028	0.313	150	S3(2.9)	0
chr12	81652044	82153332	501	12q21.31	PPFIA2	0.001	0	0	S4(1.6)	0
chr3	155755489	156256545	501	3q25.31	KCNAB1	0.001	0.01	5	S2(3.6)	0
chr4	167654534	168155947	501	4q32.3	SPOCK3	0	0	0	G2(1.3)	0
chrX	147582138	148082193	500	Xq28	AFF2	0.082	0.998	499	G2(1.3)	0
chr13	60239716	60738121	498	13q21.2	DIAPH3	1.384	1	510	S3(3)	0.176		1			1
chr6	166822851	167319939	497	6q27	RPS6KA2	0.234	0.44	228	S3(2.8)	0
chr6	56322784	56819426	497	6p12.1	DST	8.82	1	522	S1(5)	1			2		2
chr7	136370305	136866854	497	7q33	hsa-mir-490	0.006	0.038	19	S2(4.4)	0
chr2	148778579	149275805	497	2q23.1	MBD5	0.831	0.992	361	S4(2)	0.452		1			1
chr7	81575759	82073114	497	7q21.11	CACNA2D1	0.665	1	519	S2(3.8)	0.524				1	1
chr4	84717588	85214565	497	4q21.23	RP11-8L2.1	0.001	0.012	6	S3(2.7)	0
chr12	26490341	26986131	496	12p11-12	ITPR2	0.249	1	497	S1(4.5)	0
chr5	145967935	146464347	496	5q32	PPP2R2B	0.153	0.585	321	S4(2.2)	0
chr5	127873705	128369335	496	5q23.3	SLC27A6	0.011	0.339	93	S3(2.9)	0
chr2	209224437	209719227	495	2q34	PTH2R	0.002	0.026	107	S4(1.8)	0
chr2	59465850	59960531	495	2p16.1	AC007131.2	0	0	0	G2(1.4)	0
chr14	89591214	90085493	494	14q31-32	FOXN3	0.672	0.967	479	S2(4.4)	0.332			1		1
chr5	92953774	93447404	494	5q15	FAM172A	0.755	1	500	S3(3.4)	0
chr14	37147635	37642071	494	14q13.3	SLC25A21	0.02	0.769	380	S3(2.7)	0
chr4	53739148	54232242	493	4q12	SCFD2	2.332	1	600	S2(4.1)	0
chr4	109731876	110223813	492	4q25	COL25A1	0.001	0	0	S3(3)	0
chr8	52232137	52722005	490	8q11.22-23	PXDNL	0.017	0.066	34	S4(1.8)	0
chr8	69242956	69731257	488	8q13.2	C8orf34	0.04	0.397	242	S2(3.6)	0
chr8	94225530	94712661	487	8q22.1	LINC00535	0.003	0.105	67	S3(3.2)	0
chr4	78978723	79465423	487	4q21.21	FRAS1	0.048	1	494	S2(3.8)	0
chr3	24729409	25215796	486	3p24.2	AC133680.1	0.002	0	0	S4(1.7)	0
chr10	12391480	12877545	486	10p13	CAMK1D	0.062	1	491	S3(2.9)	0
chr8	106330919	106816760	486	8q23.1	ZFPM2	1.34	0.999	507	S2(3.6)	0
chr19	30719196	31204445	485	19q12	ZNF536	0.339	1	504	S4(2)	0.005			1		1
chr2	178487979	178973066	485	2q31.2	PDE11A	0.097	0.933	457	S3(3.1)	0
chr4	101316497	101801283	485	4q24	EMCN	0.002	0	0	S3(3.1)	0
chr2	18059113	18542882	484	2p24.2	KCNS3	0.022	0.343	166	S3(3.3)	0
chr14	80943329	81425861	483	14q31.1	CEP128	0.242	0.964	526	S2(3.5)	0
chr8	107282472	107764922	482	8q23.1	OXR1	0.755	1	507	S2(3.5)	0
chr18	33877676	34360018	482	18q12.2	FHOD3	0.609	1	531	S2(4.4)	0.41		1	1		2
chr18	10666479	11148587	482	18p11.21-22	PIEZO2	0.002	0	0	S3(2.9)	0
chr9	37588409	38068684	480	9p13.2	RP11-613M10.9	0.652	0.7	309	S1(4.7)	0
chr7	111366165	111846466	480	7q31.1	DOCK4	0.106	1	494	S3(2.8)	0
chr13	29598747	30077892	479	13q12.3	MTUS2	0.002	0	0	S3(3.4)	0
chr3	82035288	82512826	478	3p12.2	RP11-260O18.1	0.001	0	0	G2(1.4)	0
chr11	120382467	120859613	477	11q23.3	GRIK4	0.002	0.04	175	S3(2.8)	0
chr2	171034654	171511681	477	2q31.1	MYO3B	0.001	0	0	S3(2.8)	0
chr7	33168855	33645680	477	7p14.3	BBS9	0.341	1	597	S2(3.9)	0
chr7	119913721	120390385	477	7q31.31	KCND2	0.291	1	502	S4(2.2)	0
chr3	62384021	62861054	477	3p14.2	CADPS	0.001	0	0	S3(3)	0
chr7	48211054	48687092	476	7p12.3	ABCA13	0.002	0	0	S3(2.8)	0
chr12	125671381	126146917	476	12q24.31-32	TMEM132B	0.007	0	0	S3(2.8)	0
chr8	48173166	48648868	476	8q11.21	SPIDR	0.523	0.96	449	S2(3.7)	0
chr11	26210828	26684835	474	11p14.2	ANO3	0.125	1	486	S3(2.6)	0
chr12	22852792	23327057	474	12p12.1	RP11-114G22.1	0.004	0.098	118	S4(2.3)	0
chr10	20105167	20578785	474	10p12.31	PLXDC2	0.001	0	0	S4(1.5)	0
chr3	18486515	18959184	473	3p24.3	AC144521.1	0.004	0.008	4	G2(1.4)	0
chr6	151977825	152450754	473	6q25.1	ESR1	0.012	0.362	171	S3(3.1)	0
chr2	218148741	218621316	473	2q35	DIRC3	0.122	1	479	S1(4.9)	0
chr6	51480097	51952423	472	6p12.2-3	PKHD1	0	0	0	S4(2)	0
chr6	38136226	38607924	472	6p21.2	BTBD9	0.546	0.999	496	S1(4.7)	0
chr9	78505559	78977255	472	9q21.13	PCSK5	0.004	0	0	S3(2.8)	0
chr5	31639516	32111037	472	5p13.3	PDZD2	0.001	0.03	14	S2(3.7)	0
chr1	59762309	60233347	471	1p32.1	FGGY	0.181	1	477	S2(4.3)	0
chr18	42792959	43263072	470	18q12.3	SLC14A2	0.002	0	0	S2(4.4)	0
chr2	40013592	40482349	469	2p22.1	SLC8A1-AS1	0.045	0.719	340	S1(4.9)	0
chr7	101458958	101927249	468	7q22.1	CUX1	0.48	0.997	468	S2(4.4)	0
chr5	112357795	112824527	467	5q22.2	MCC	0.196	1	476	S1(4.5)	0
chr2	163227916	163695240	467	2q24.2	KCNH7	0.001	0	0	S3(2.8)	0
chr5	93488670	93954309	466	5q15	KIAA0825	0.129	1	480	S3(2.8)	0.05			1		1
chr7	137065782	137531838	466	7q33	DGKI	2.21	1	493	S1(5)	0
chr1	8412456	8877702	465	1p36.23	RERE	1.11	1	506	G1(5.5)	0.506	1				1
chr6	16299342	16761722	462	6p22.3	ATXN1	1.616	1	502	S1(4.9)	0
chrX	123094061	123556514	462	Xq25	STAG2	0.456	0.353	163	S3(3.3)	0
chr7	11409983	11871824	462	7p21.3	THSD7A	0.001	0	0	S4(1.5)	0
chr18	5954704	6415236	461	18p11.31	L3MBTL4	0	0	0	S4(2.3)	0
chr3	146627471	147088443	461	3q24	RP11-649A16.1	0.004	0.13	92	S3(2.6)	0
chr1	240177647	240638489	461	1q43	FMN2	7.173	0.831	414	S1(5)	0
chr9	16409500	16870841	461	9p22.2-3	BNC2	0.733	0.999	498	S1(4.8)	0
chr8	15965386	16424999	460	8p22	MSR1	0.004	0	0	S3(3.3)	0
chr5	142149948	142608576	459	5q31.3	ARHGAP26	0.089	0.994	479	S1(5.3)	0
chr12	66741210	67197966	457	12q14.3	GRIP1	0	0	0	S3(3.1)	0
chr1	185703682	186160085	456	1q25-31	HMCN1	0.311	1	470	S2(4)	0
chr9	6720862	7175648	455	9p24.1	KDM4C	0.765	0.919	457	S3(3.1)	0
chr8	137543040	137997178	454	8q24.23	RP11-30J20.1	0.001	0	0	G2(1.4)	0
chr4	19457058	19911315	454	4p15.31	RP11-608O21.1	0.001	0	0	S2(3.7)	0
chr15	62682724	63136830	454	15q22.2	TLN2	0.701	1	471	S1(5.1)	0
chr2	33172038	33624576	453	2p22.3	LTBP1	1.618	1	494	S1(5.4)	0
chr7	43152197	43605600	453	7p13-14	HECW1	0.094	0.702	320	S2(3.9)	0
chr3	39850404	40301812	451	3p22.1	MYRIP	0.007	0.117	40	S3(2.7)	0
chr1	210856554	211307457	451	1q32.2	KCNH1	0.011	0.262	118	S3(2.9)	0
chr15	29412456	29862927	450	15q13.1	FAM189A1	0.008	0.058	22	S3(3.1)	0
chrX	132669772	133119922	450	Xq26.2	GPC3	0	0	0	S4(2)	0
chr5	109624933	110074657	450	5q22.1	TMEM232	0.012	0.434	195	S4(2.2)	0
chr4	5053168	5502725	450	4p16.2	STK32B	0.1	0.999	453	S2(3.5)	0
chr5	108083522	108532542	449	5q21.3	FER	1.298	1	457	S3(3.2)	0
chr2	28112807	28561768	449	2p23.2	BRE	0.491	1	574	G1(5.5)	0
chr18	67068290	67516323	448	18q22.2	DOK6	0.221	1	452	S3(2.8)	0
chr13	74260225	74708394	448	13q22.1	KLF12	1.543	1	476	S2(3.7)	0
chr12	83080658	83528649	448	12q21.31	TMTC2	0.077	1	448	G2(1.4)	0
chr3	164924747	165373211	448	3q26.1	RP11-85M11.2	0.001	0.007	3	G2(1.2)	0
chr12	28286181	28732883	447	12p11.22	CCDC91	0.686	0.874	415	S3(3.4)	0
chr17	70642087	71088851	447	17q24-25	SLC39A11	0.288	1	452	S2(4.2)	0
chrX	42111711	42558636	447	Xp11.3-4	RP1-154K9.2	0.001	0	0	S4(1.9)	0
chr16	25703346	26149009	446	16p12.1	HS3ST4	0	0	0	S4(1.9)	0
chr14	38065051	38510647	446	14q21.1	TTC6	0.002	0	0	S3(3.1)	1				1	1
chr5	169064250	169510386	446	5q35.1	DOCK2	0.154	1	450	S2(4.4)	0
chr8	61969716	62414204	444	8q12.2-3	CLVS1	0.001	0	0	S3(2.8)	0
chr5	83236372	83680611	444	5q14.3	EDIL3	0.001	0.007	3	S3(2.6)	0
chr21	32490733	32932290	442	21q22.11	TIAM1	0.051	0.518	236	S4(2.4)	0
chr1	242246287	242687998	442	1q43	PLD5	0	0	0	S4(2.3)	0
chr18	52889561	53332018	442	18q21.2	TCF4	1.529	0.834	373	S2(3.9)	0
chr3	170136652	170578169	442	3q26.2	CLDN11	0.166	0.62	221	G1(5.5)	0
chr4	82523950	82965397	441	4q21.22	RP11-689K5.3	0.001	0.016	7	S4(2.2)	0
chr13	100741268	101182686	441	13q32.3	PCCA	0.586	1	464	S3(3)	0
chr12	128751947	129192460	441	12q24.32	TMEM132C	0	0	0	S4(1.6)	0
chr8	56014948	56454613	440	8q12.1	XKR4	0	0	0	S4(1.8)	0
chr7	127292233	127732661	440	7q32.1	SND1	3.299	1	459	S2(4.1)	0
chr2	213446080	213886269	440	2q34	AC079610.1	0.148	0.729	452	S3(3.4)	0
chr3	157823643	158263519	440	3q25.32	RSRC1	0.816	0.998	464	S2(3.5)	0
chr12	13693164	14133053	440	12p13.1	GRIN2B	0	0	0	S3(2.6)	0
chr5	15500304	15939900	440	5p15.1	FBXL7	1.012	1	502	S3(3)	0
chr20	58662894	59102516	440	20q13.33	RP5-1043L13.1	0.001	0	0	S4(2.3)	0
chr20	50827183	51266970	440	20q13.2	RP4-723E3.1	0.005	0.045	20	S4(2.4)	0
chr5	170288873	170727019	438	5q35.1	RANBP17	0.189	1	444	S3(3.2)	0
chrX	10413349	10851773	438	Xp22.2	MID1	0.297	1	443	S2(4.3)	0
chr8	102698770	103137135	438	8q22.3	NCALD	0.255	0.999	439	S3(3)	0
chr21	30566391	31003071	437	21q21.3	BACH1	0.77	1	466	S1(4.8)	0
chr5	45259348	45696253	437	5p12	HCN1	0.002	0	0	G2(1.4)	0
chr4	140637906	141075338	437	4q31.1	MAML3	0.051	1	457	S2(4.3)	0
chr5	91378413	91815133	437	5q14.3	RP11-348J24.2	0.005	0.22	96	S3(2.8)	0
chr9	18473891	18910948	437	9p22.1-2	ADAMTSL1	8.342	1	465	S2(4.3)	0
chr18	13217496	13652754	435	18p11.21	LDLRAD4	0.009	0	0	S4(2.4)	0
chr2	215114763	215548970	434	2q34-35	AC107218.3	0.005	0.04	144	S4(2.4)	0
chr5	7396320	7830194	434	5p15.31	ADCY2	0	0	0	S4(1.8)	0
chr8	33462373	33896526	434	8p12	RP11-317N12.1	0	0	0	S4(1.9)	0
chr6	157099062	157531913	433	6q25.3	ARID1B	1.726	0.999	512	S2(3.7)	0
chr4	46995739	47428461	433	4p12	GABRB1	0.001	0	0	S2(3.8)	0
chr8	119201697	119634234	433	8q24.12	SAMD12	0.127	1	437	G1(5.5)	0
chr8	12940869	13373167	432	8p22	DLC1	3.614	0.995	237	S1(5.2)	0.214		1			1
chr4	169418216	169849608	431	4q32.3	PALLD	0.738	0.715	333	G1(5.5)	0
chr5	164776035	165205694	430	5q34	CTC-535M15.2	0	0	0	G2(1.4)	0
chr15	33057746	33486897	429	15q13.3	FMN1	0.456	0.708	305	G1(5.6)	0
chr17	55333211	55762046	429	17q22	MSI2	0.233	0.999	437	S2(4.2)	0
chr13	72012097	72441330	429	13q21.33	DACH1	0.001	0	0	G2(1.3)	0
chr2	43393799	43823185	429	2p21	THADA	0.729	0.961	414	S1(5.2)	0
chr1	175284329	175712906	429	1q25.1	TNR	0	0	0	S4(1.9)	0.023	1				1
chr1	86194915	86622626	428	1p22.3	COL24A1	0.004	0	0	S2(4.3)	0
chr10	25463990	25891155	427	10p12.1	GPR158	0	0	0	S3(2.6)	0
chr5	53179774	53606412	427	5q11.2	ARL15	0.374	1	430	S2(4.2)	0
chr5	66675205	67101066	426	5q12-13	RP11-434D9.1	0.001	0.007	3	S3(2.8)	0
chr4	30722036	31148422	426	4p15.1	PCDH7	0.001	0	0	S4(2)	0
chr6	155153830	155578857	425	6q25.2-3	TIAM2	0.565	1	536	S1(5.2)	0
chr5	162439270	162864332	425	5q34	RP11-541P9.3	0.001	0.023	31	S4(2)	0
chr2	946553	1371385	425	2p25.3	SNTG2	0.006	0.097	41	S4(2.4)	0
chr16	9852375	10276611	424	16p13.2	GRIN2A	0.005	0	0	S4(2.4)	0
chr3	25215822	25639423	424	3p24.2	RARB	0.001	0.028	12	S3(2.5)	0
chr16	70841280	71264625	423	16q22.2	HYDIN	0.021	0.591	250	S2(3.5)	0
chrX	68835910	69259319	423	Xq13.1	EDA	0.001	0	0	S4(2.3)	0
chr4	15006565	15429538	423	4p15.32-33	RP11-665G4.1	0.007	0.147	144	S2(3.7)	0
chr12	23682439	24103966	422	12p12.1	SOX5	0	0	0	S4(2.1)	0
chr17	78518618	78940171	422	17q25.3	RPTOR	0.704	1	426	S1(5.1)	0
chr1	62208148	62629592	421	1p31.3	INADL	0.196	0.999	428	S3(2.7)	0
chr11	101322294	101743293	421	11q22.1	TRPC6	0.002	0	0	S2(3.6)	0
chr6	123537482	123958238	421	6q22.31	TRDN	0.001	0	0	G2(1.3)	0
chr14	71787165	72207946	421	14q24.2	SIPA1L1	2.715	0.999	430	S1(4.6)	0
chr12	75956981	76377795	421	12q21.2	RP11-114H23.1	0.008	0.122	101	G1(5.6)	0
chr9	101050390	101471479	421	9q22.33	GABBR2	0.22	0.998	422	S1(5)	0.742		1			1
chr2	229715241	230136001	421	2q36.3	PID1	0.351	0.885	373	S3(2.6)	0
chr2	180306708	180726232	420	2q31.2-3	ZNF385B	0.002	0	0	S3(3)	0
chr3	31699381	32119072	420	3p22-23	OSBPL10	0.05	0.77	345	S3(2.8)	0
chr1	234040678	234460262	420	1q42.2	SLC35F3	0.004	0.264	126	S3(3.4)	0
chr10	73156690	73575702	419	10q22.1	CDH23	0.001	0	0	S2(4.2)	0
chr16	53737874	54155853	418	16q12.2	FTO	1.458	1	463	S3(2.5)	0
chr18	46570038	46987717	418	18q21.1	DYM	0.98	0.997	427	S1(5.1)	0
chr4	14472088	14889793	418	4p15.33	LINC00504	0.001	0	0	S4(2.3)	0
chr14	58030639	58448912	418	14q22-23	SLC35F4	0.001	0	0	S3(2.5)	0
chr17	61086916	61505060	418	17q23.2-3	TANC2	1.752	1	476	S1(4.9)	0
chr19	13317255	13734804	418	19p13.2	CACNA1A	0.096	0.721	303	S1(4.9)	0
chr7	1855428	2272878	417	7p22.3	MAD1L1	0.292	1	424	S1(4.5)	0
chr5	132532146	132948255	416	5q31.1	FSTL4	0	0	0	S3(3.3)	1			1		1
chr4	137717876	138133953	416	4q28.3	RP11-138I17.1	0.133	1	537	S3(2.7)	0
chr3	136055076	136471220	416	3q22.3	STAG1	1.861	1	426	S1(4.7)	0
chr10	320129	735683	416	10p15.3	DIP2C	0.847	1	477	S1(4.5)	0
chr1	231762560	232177018	414	1q42.2	DISC1	0.168	1	580	S3(3.2)	0
chr12	5641034	6055398	414	12p13.31	ANO2	0	0	0	S2(3.6)	0
chr5	4452042	4866334	414	5p15.32-33	RP11-445O3.2	0	0	0	G2(1.4)	0
chr12	44902057	45315631	414	12q12	NELL2	0.001	0.007	3	S4(2.3)	0
chr22	47158517	47571336	413	22q13.31	TBC1D22A	0.566	1	469	S2(4.1)	0
chr20	9049409	9461889	412	20p12.2-3	PLCB4	2.17	1	474	S2(4.2)	0
chr12	101111303	101522419	411	12q23.1	ANO4	0.264	1	424	S3(2.9)	0
chr2	44589088	44999731	411	2p21	CAMKMT	0.248	1	441	S3(3.2)	0
chr6	118228688	118638839	410	6q22.1-31	SLC35F1	0	0	0	S3(3)	0
chr6	146348781	146758734	410	6q24.3	GRM1	0.001	0	0	S4(2.3)	0
chr8	89339064	89749363	410	8q21.3	RP11-586K2.1	0.013	0.283	116	S4(2.2)	0.657	1				1
chr1	75667815	76076801	409	1p31.1	SLC44A5	0.001	0	0	S4(1.9)	0
chr7	82383328	82792246	409	7q21.11	PCLO	0.001	0	0	S3(2.7)	0
chr1	71547006	71955652	409	1p31.1	ZRANB2-AS2	0.018	0.532	217	S4(2.4)	0.207		1			1
chrX	41374186	41782716	409	Xp11.4	CASK	0.752	1	414	S2(3.5)	0
chr16	80188949	80597032	408	16q23.2	RP11-525K10.3	0.012	0.362	154	S3(3.1)	0
chr13	70274725	70682591	408	13q21.33	KLHL1	0.001	0.007	3	G2(1.3)	0
chr1	64239692	64647181	407	1p31.3	ROR1	1.28	0.998	421	S2(4.4)	0
chr4	40812043	41218731	407	4p13-14	APBB2	1.685	0.995	414	S2(4.3)	0
chr7	140774031	141180180	406	7q34	TMEM178B	0.016	0.625	254	S4(2.4)	0
chr1	39546987	39952849	406	1p34.3	MACF1	2.1	1	426	S1(5.3)	0
chr5	128836053	129241610	406	5q23.3	CTC-575N7.1	0.001	0	0	S4(1.6)	0
chr3	34200825	34604369	404	3p22.3	AC018359.1	0.001	0	0	S4(2)	0
chr3	106555657	106959488	404	3q13.12	LINC00882	0.021	0.5	251	S2(3.8)	0
chr5	158122927	158526769	404	5q33.3	EBF1	1.547	1	419	S3(3)	0
chr11	2465913	2870339	404	11p15.4-5	KCNQ1	0.001	0	0	S2(4.2)	0
chr18	34409068	34812135	403	18q12.2	KIAA1328	0.252	1	415	S3(3.1)	0
chr21	30909253	31312351	403	21q21.3	GRIK1	0	0	0	S3(3.2)	0
chr17	54188318	54589020	401	17q22	ANKFN1	0.015	0.603	250	S3(3.3)	0
chr8	73449625	73850584	401	8q13.3	KCNB2	0	0	0	S4(2.1)	0
chr12	18400547	18801348	401	12p12.3	PIK3C2G	0.001	0.017	7	S3(3)	0
chr5	127593600	127994878	401	5q23.3	FBN2	0.814	0.703	292	S2(3.5)	0
chr10	18429605	18830798	401	10p12.31-33	CACNB2	0.119	1	407	S3(2.9)	0
chr8	116420723	116821899	401	8q23.3	TRPS1	2.107	0.65	386	S3(2.8)	0
chr4	95679118	96079599	400	4q22.3	BMPR1B	0.166	1	446	S2(3.5)	0
chr8	687650	1087777	400	8p23.3	ERICH1-AS1	0	0	0	S4(2.1)	0
chr3	170779127	171178197	399	3q26.2-31	TNIK	0.195	1	408	S1(4.8)	0
chr18	32073253	32471808	399	18q12.1	DTNA	0.018	0.394	157	S3(2.9)	0
chr2	197059093	197458416	399	2q32-33	HECW2	1.809	1	426	S1(4.9)	0.51				1	1
chr7	106012696	106410653	398	7q22.3	CTB-111H14.1	0.073	0.551	220	S1(4.8)	0
chr4	16503163	16900432	397	4p15.32	LDB2	1.064	1	423	S2(4)	0
chr4	123844228	124240605	396	4q28.1	SPATA5	0.797	1	405	S2(4.4)	0
chr15	26788692	27184686	396	15q12	GABRB3	0	0	0	S4(1.5)	0
chr6	39297765	39693181	395	6p21.2	KIF6	0.007	0.174	69	S4(2.4)	0
chr1	181382237	181777219	395	1q25.3	CACNA1E	0	0	0	S3(2.8)	0
chr2	144695634	145090135	395	2q22.3	GTDC1	0.334	1	404	S2(3.9)	0
chr14	63173286	63568755	395	14q23.2	KCNH5	0.001	0	0	S3(2.5)	0
chr10	21068901	21463116	394	10p12.31	NEBL	0.001	0	0	S3(2.8)	0
chr1	108113781	108507766	394	1p13.3	VAV3	0.011	0.342	137	G2(1.4)	0
chr2	15307031	15701454	394	2p24.3	NBAS	1.364	1	476	S4(2.2)	0
chr2	135894485	136288806	394	2q21.3	ZRANB3	0.154	0.919	363	S3(3.4)	0
chr13	42140972	42535256	394	13q14.11	VWA8	0.564	1	405	S1(5)	0
chr11	5274419	5667019	393	11p15.4	HBG2	0.012	0.388	116	S2(3.5)	0
chr9	112542768	112934792	392	9q31.3	AKAP2	2.532	1	483	S1(5.4)	0
chr9	112542588	112934792	392	9q31.3	PALM2-AKAP2	2.532	1	483	S1(5.4)	0
chr7	29161889	29553944	392	7p14.3	CHN2	0.005	0	0	S4(2.3)	0
chr8	131064352	131455906	392	8q24.21	ASAP1	5.752	1	427	S1(5.1)	0
chrX	67262185	67653755	392	Xq12	OPHN1	0.492	1	420	S3(3)	0
chr6	133823389	134213074	390	6q23.2	RP3-323P13.2	0.026	0.672	262	S1(4.5)	0
chr16	61681145	62070939	390	16q21	CDH8	0	0	0	G2(1.3)	0
chr11	117298488	117688240	390	11q23.3	DSCAML1	0	0	0	S2(3.7)	0
chr3	63213990	63602597	389	3p14.2	SYNPR	0	0	0	S4(2.4)	0
chr14	44464983	44853748	389	14q21.2	RP11-305B6.3	0.002	0.008	3	G2(1.4)	0
chr7	94536513	94925727	389	7q21.3	PPP1R9A	0.002	0	0	S4(2.4)	0
chr3	23244510	23633284	389	3p24.3	UBE2E2	0.893	1	444	S2(4.1)	0
chrX	5758677	6146904	388	Xp22.31-32	NLGN4X	0	0	0	G2(1.3)	0
chr15	31775328	32162992	388	15q13.3	OTUD7A	0.008	0.121	39	S3(2.8)	0
chr18	42260137	42648475	388	18q12.3	SETBP1	0.445	1	405	S3(2.7)	0
chr5	14143810	14532235	388	5p15.2	TRIO	9.174	1	412	S1(5.3)	0
chr3	19189945	19577138	387	3p24.3	KCNH8	0.001	0	0	G2(1.4)	0
chr7	130794854	131181395	387	7q32.3	MKLN1	1.153	1	424	S1(5.4)	1		1			1
chr4	96083654	96470357	387	4q22.3	UNC5C	0.001	0	0	S4(1.8)	0
chr9	94325372	94712444	387	9q22.31	ROR2	0.023	0.806	236	S2(4.4)	0
chr15	84322837	84708594	386	15q25.2	ADAMTSL3	0	0	0	S4(2.3)	0
chr12	96883348	97269333	386	12q23.1	C12orf55	0.015	0.314	126	S1(4.8)	0
chr1	178062863	178448644	386	1q25.2	RASAL2	2.476	1	387	S1(5)	0
chr2	111490149	111875799	386	2q13	ACOXL	0	0	0	S2(4.2)	0
chr2	35024916	35410755	386	2p22.3	AC012593.1	0.001	0	0	G2(1.4)	0
chr12	41582249	41968392	386	12q12	PDZRN4	0	0	0	S4(1.5)	0
chr17	30819539	31204195	385	17q11.2	MYO1D	0.624	1	386	S2(3.7)	0
chr4	72053002	72437804	385	4q13.3	SLC4A4	2.058	1	481	S2(4.1)	0
chr4	89647105	90032549	385	4q22.1	FAM13A	0.208	0.862	360	S2(4.3)	0
chr16	23847321	24231932	385	16p12.1-2	PRKCB	0	0	0	S3(2.8)	0
chr3	10365706	10749716	384	3p25.3	ATP2B2	0	0	0	S2(4.2)	0
chr7	144149033	144533488	384	7q35	TPK1	0.035	1	400	G2(1.3)	0
chr18	45553043	45937123	384	18q21.1	ZBTB7C	0.001	0.034	13	S2(4)	0
chr2	232825954	233209060	383	2q37.1	DIS3L2	0.758	1	390	S2(3.8)	0
chr2	183004762	183387919	383	2q32.1	PDE1A	0.047	0.808	325	S2(3.9)	0
chr1	196194908	196578355	383	1q31.3	KCNT2	0.018	0.78	299	S4(2.3)	0
chr5	169780490	170163636	383	5q35.1	KCNIP1	0	0	0	S3(2.5)	0
chr18	65183782	65566856	383	18q22.1	RP11-638L3.1	0.033	0.769	295	S2(4)	0
chr12	78224684	78606790	382	12q21.2	NAV3	3.903	1	439	S3(3.2)	0.357		2			2
chr3	9022274	9404737	382	3p25.3	SRGAP3	0.034	1	400	S2(4.4)	0
chr1	176432306	176814735	382	1q25.2	PAPPA2	0.12	1	388	S4(1.6)	0
chr15	88418229	88799999	382	15q25.3	NTRK3	0.011	0.149	57	S4(2.4)	0
chr15	57210820	57591479	381	15q21.3	TCF12	2.371	1	382	S1(4.6)	0
chr4	21950637	22331953	381	4p15.2	RP11-17E2.2	0.001	0	0	S4(2.3)	0
chr3	101818087	102198685	381	3q12.3	ZPLD1	0.002	0	0	S2(4.2)	0
chr4	68566997	68946670	380	4q13.2	UBA6-AS1	0.041	0.383	147	S3(2.8)	0
chrX	69748789	70128581	380	Xq13.1	TEX11	0	0	0	S3(3.2)	0
chr12	41086243	41466220	380	12q12	CNTN1	0	0	0	S4(1.5)	0
chr18	54318573	54698828	380	18q21.31	WDR7	0.601	1	390	S3(3.2)	0
chr1	190066791	190446759	380	1q31.1	BRINP3	0.001	0	0	S4(1.7)	0
chr2	19167728	19546509	379	2p24.1-2	AC092594.1	0.085	1	388	S1(4.5)	0
chr3	24158650	24536773	378	3p24.2	THRB	0.634	0.999	392	S2(3.5)	0
chr3	188665002	189043093	378	3q28	TPRG1	0.028	0.586	828	S1(4.5)	0
chr3	3292370	3668980	377	3p26.2	AC026188.1	0.001	0	0	G2(1.3)	0
chr2	8147900	8523751	376	2p25.1	LINC00299	0.002	0	0	S3(3)	0
chr10	127700949	128077024	376	10q26.2	ADAM12	4.61	1	407	S2(4.2)	0.902	1	1	1		3
chr8	116962735	117337297	375	8q23.3	LINC00536	0.007	0	0	S3(3)	0
chr4	116843170	117218316	375	4q26	RP11-659O3.1	0.001	0	0	G2(1.3)	0
chr16	58767815	59142878	375	16q21	RP11-410D17.2	0.004	0.008	3	S3(3.1)	0
chr3	89156673	89531284	375	3p11.1	EPHA3	0.001	0	0	S4(1.5)	0
chr8	9911777	10286401	375	8p23.1	MSRA	0.253	1	380	S4(2.3)	0
chr14	93799564	94174222	375	14q32.12	UNC79	0.003	0.013	6	S3(2.9)	0
chr11	105028653	105402424	374	11q22.3	RP11-94P11.4	0.001	0	0	S3(2.9)	0
chr18	31431063	31804916	374	18q12.1	NOL4	0	0	0	G2(1.4)	0
chr4	128018045	128391724	374	4q28.1	RP11-125O18.1	0	0	0	S3(2.6)	0
chr5	37379313	37753537	374	5p13.2	WDR70	0.979	1	462	S1(4.7)	0
chr14	64319682	64693165	373	14q23.2	SYNE2	0.074	0.998	385	S2(4.4)	0
chr3	69219140	69591734	373	3p14.1	FRMD4B	0.037	0.581	219	S2(3.5)	0
chr3	111011565	111384597	373	3q13.13-2	CD96	0.003	0	0	S1(4.7)	0
chr20	13246708	13619587	373	20p12.1	TASP1	0.328	0.939	351	S4(2.4)	0
chr6	100956069	101329248	373	6q16.3	ASCC3	2.021	1	383	S2(3.5)	0.598		1			1
chr2	62900985	63273622	373	2p15	EHBP1	2.367	0.915	345	S2(3.9)	0
chr12	22216706	22589975	373	12p12.1	ST8SIA1	0.002	0	0	S4(2.3)	0
chr5	32925744	33298016	372	5p13.3	CTD-2066L21.3	0.997	0.934	584	S1(4.6)	0
chr18	40323191	40695657	372	18q12.3	RIT2	0.001	0.019	7	S4(1.8)	0
chr11	105480720	105852819	372	11q22.3	GRIA4	0.001	0	0	S3(2.6)	0
chr10	114206755	114578503	372	10q25.2	VTI1A	0.732	1	377	S2(3.9)	0
chr18	47349182	47721463	372	18q21.1	MYO5B	0	0	0	S3(2.8)	0
chr3	37493605	37865005	371	3p22.2	ITGA9	0.002	0	0	S2(4.2)	0
chr17	11501747	11873065	371	17p12	DNAH9	0	0	0	S4(2.4)	0
chr2	167744996	168116263	371	2q24.3	XIRP2	0.001	0	0	S3(3)	0
chr5	130761583	131132676	371	5q31.1	CTC-432M15.3	1.782	1	435	S2(3.9)	0
chr4	186506597	186877806	371	4q35.1	SORBS2	0.007	0.102	38	S4(2.4)	0
chr1	68297985	68668670	371	1p31.3	GNG12-AS1	0.043	0.892	332	S1(5)	0
chr14	31959161	32330430	371	14q12	NUBPL	0.2	0.811	381	S2(3.7)	0
chr16	49521434	49891830	370	16q12.1	ZNF423	0.007	0	0	S4(2.4)	0
chr4	176554084	176923815	370	4q34.2	GPM6A	0	0	0	S4(2.4)	0
chr1	21132962	21503377	370	1p36.12	EIF4G3	2.318	1	390	S1(5.3)	0
chr15	100511793	100882210	370	15q26.3	ADAMTS17	0	0	0	S3(2.5)	0
chr11	102980159	103350591	370	11q22.3	DYNC2H1	0.474	1	383	S1(4.5)	0
chr6	90636247	91006627	370	6q15	BACH2	0.001	0	0	S2(3.7)	0
chr3	155093368	155462856	369	3q25.31	PLCH1	0.013	0.629	232	S3(3.4)	0
chr15	85923801	86292586	369	15q25.3	AKAP13	2.135	1	382	S1(4.9)	0.701		1			1
chr16	17195625	17564738	369	16p12.3	XYLT1	2.617	1	377	S3(3.2)	0
chr1	2985731	3355185	369	1p36.32	PRDM16	0	0	0	S3(2.9)	0
chr9	17134979	17503921	369	9p22.2	CNTLN	0.442	1	401	S2(3.7)	0
chr5	33523639	33892297	369	5p13.2-3	ADAMTS12	0.401	1	371	S1(4.9)	0
chr11	95709761	96076344	367	11q21	MAML2	2.274	1	418	S1(5.4)	0
chr8	40388108	40755352	367	8p11.21	ZMAT4	0.001	0	0	S3(3.4)	0
chr8	139142265	139509065	367	8q24.23	FAM135B	0	0	0	G2(1.4)	0
chr4	20254882	20622184	367	4p15.31	SLIT2	1.609	1	477	S2(3.5)	0
chr4	148999912	149365850	366	4q31.23	NR3C2	0.003	0.011	4	S3(2.8)	0
chr21	19273579	19639690	366	21q21.1	CHODL	0	0	0	S4(1.8)	0
chr8	92555151	92919847	365	8q21.3	RP11-122C21.1	0.001	0	0	S3(2.5)	0
chr5	144851361	145214932	364	5q32	PRELID2	0.148	1	454	S3(3.2)	0
chr6	147163036	147525750	363	6q24.3	STXBP5-AS1	0.119	1	404	S2(4.3)	0
chr7	123672258	124035172	363	7q31.32-33	RP5-921G16.1	0.001	0	0	S4(2)	0
chr7	7680341	8043689	363	7p21.3	RPA3-AS1	0.321	1	472	S3(3.2)	0.004		1			1
chr7	106841999	107204959	363	7q22.3	COG5	0.831	1	371	S2(4)	0
chr14	61654276	62017694	363	14q23.1	PRKCH	0.009	0.245	207	G1(5.6)	0
chr13	101706129	102068843	363	13q33.1	NALCN	0.095	0.996	381	S2(4)	0
chr1	243651534	244014381	363	1q43-44	AKT3	1.86	0.998	377	S2(4.3)	0
chr7	15239942	15601640	362	7p21.2	AGMO	0.001	0	0	S4(1.8)	0
chr3	171757417	172119455	362	3q26.31	FNDC3B	5.247	1	390	S1(4.7)	0.344			1		1
chr4	107842958	108204963	362	4q25	DKK2	0.013	0.311	62	S4(2.3)	0
chr3	99536677	99897447	361	3q12.1	CMSS1	0.395	1	362	S1(5.3)	0
chrX	17393542	17754114	361	Xp22.13	NHS	0.257	1	362	S3(2.5)	0
chr11	28724161	29085368	361	11p14.1	RP11-115J23.1	0.066	1	479	S1(4.8)	0
chr22	48885271	49246724	361	22q13.32	FAM19A5	0.273	0.966	349	S4(2.1)	0
chr9	97488982	97849441	360	9q22.32	C9orf3	3.3	1	388	S1(5.2)	0
chr13	36345477	36705443	360	13q13.3	DCLK1	0.042	1	369	S3(3.4)	0
chr8	133133107	133493200	360	8q24.22	KCNQ3	0.108	0.559	206	S4(2.1)	0
chr15	66187416	66546085	359	15q22.31	MEGF11	0.001	0	0	S2(4.3)	0
chr3	132757234	133116636	359	3q22.1	TMEM108	0	0	0	S2(3.6)	0
chr7	21582832	21941457	359	7p15.3	DNAH11	0.003	0	0	S4(2)	0
chr18	1883524	2240847	357	18p11.32	RP11-161I6.2	0.001	0	0	S4(2.4)	0
chr2	230222344	230579274	357	2q36.3	DNER	0.005	0.044	223	S3(2.8)	0
chr18	55711598	56068772	357	18q21.31	NEDD4L	0.129	0.58	208	S1(5.1)	0
chr2	8062555	8418214	356	2p25.1	AC007464.1	0.002	0	0	S3(3)	0
chr9	87283465	87638505	355	9q21.33	NTRK2	0	0	0	S4(1.7)	0
chr8	19261671	19615540	354	8p21.3	CSGALNACT1	0.002	0	0	S1(4.7)	0
chrX	19552092	19905719	354	Xp22.12	SH3KBP1	0.842	1	366	S2(3.8)	0
chr14	37667117	38021566	354	14q13-21	MIPOL1	0.166	1	367	S3(2.9)	0.804				1	1
chr3	4535031	4889524	354	3p26.1	ITPR1	0.048	1	360	S3(3.4)	0
chr10	109517590	109871360	354	10q25.1	RP11-215N21.1	0.002	0	0	S4(1.8)	0
chr5	177664618	178017556	353	5q35.3	COL23A1	0.001	0	0	S3(2.6)	0
chr2	239969863	240323348	353	2q37.3	HDAC4	0.275	0.998	364	S2(3.5)	0.374				1	1
chr6	89319984	89673348	353	6q15	RNGTT	0.941	1	373	S4(2.3)	0
chr4	141780960	142134031	353	4q31.21	RNF150	0.371	0.772	275	S2(3.7)	0
chr3	64079542	64431152	352	3p14.1	PRICKLE2	0.799	0.498	181	S1(5.1)	0
chr15	94261770	94614049	352	15q26.1-2	CTD-3049M7.1	0.003	0.024	9	S4(2.4)	0
chr3	56761445	57113357	352	3p14.3	ARHGEF3	0.105	0.995	359	S3(3.3)	0
chr17	5675553	6027747	352	17p13.2	WSCD1	0	0	0	S3(3.3)	0
chr11	11292422	11643552	351	11p15.3	GALNT18	0.013	0.011	4	S2(3.6)	0
chr4	66185280	66536213	351	4q13.1	EPHA5	0.001	0	0	G2(1.3)	0
chr3	150803483	151154860	351	3q25.1	MED12L	0.028	0.909	361	S2(3.8)	0
chr12	40148822	40499891	351	12q12	SLC2A13	0.246	0.999	372	S4(1.5)	0
chr13	101360578	101711638	351	13q32-33	NALCN-AS1	0	0	0	S3(2.8)	0
chr3	138724647	139076065	351	3q23	MRPS22	0.163	0.337	132	S2(3.8)	0
chr8	53023398	53373519	350	8q11.23	ST18	0	0	0	S3(2.7)	0
chr7	27870191	28220362	350	7p15.1-2	JAZF1	0.853	1	381	S2(4.3)	0
chr4	120988112	121337921	350	4q27	RP11-679C8.2	0.033	0.699	245	S3(2.8)	0
chr8	15274723	15624158	349	8p22	TUSC3	0.583	0.677	255	S3(2.8)	0
chr10	57007514	57356993	349	10q21.1	RP11-168O22.1	0.001	0	0	G2(1.2)	0
chr12	24366189	24715524	349	12p12.1	RP11-444D3.1	0	0	0	S4(2.2)	0
chr1	210501595	210849638	348	1q32.2	HHAT	0.047	0.974	377	S2(3.7)	0
chr4	77356252	77704406	348	4q21.1	SHROOM3	0.952	1	371	G1(5.5)	0
chr8	91233715	91581546	348	8q21.3	LINC00534	0	0	0	S3(3.1)	0
chr5	138282408	138629246	347	5q31.2	SIL1	0.447	0.73	324	S1(5)	0
chr20	10002619	10349424	347	20p12.2	SNAP25-AS1	0	0	0	S2(3.7)	0
chr5	141704857	142051566	347	5q31.3	AC005592.2	0.159	1	379	G1(5.5)	0
chr12	10977558	11324212	347	12p13.2	PRR4	0.744	1	362	S3(2.8)	0
chr18	29704839	30050447	346	18q12.1	GAREM	0.047	0.738	255	S4(2.1)	0
chr1	74663946	75010112	346	1p31.1	TNNI3K	0.033	0.12	42	S4(1.6)	0
chr1	74663918	75009666	346	1p31.1	FPGT-TNNI3K	0.033	0.12	42	S4(1.6)	0
chr14	30421602	30766249	345	14q12	CTD-2251F13.1	0.03	0.708	629	S2(3.6)	0
chr2	220970376	221315499	345	2q35	AC114765.1	0.002	0	0	S2(3.6)	0
chr2	198669425	199014608	345	2q33.1	PLCL1:1	0.529	1	387	S3(2.6)	0
chr11	106544737	106889250	345	11q22.3	GUCY1A2	0.016	0.766	172	S4(2.3)	0
chr7	135777672	136122174	345	7q33	AC009784.3	0	0	0	S3(2.6)	0
chr8	141667998	142012315	344	8q24.3	PTK2	3.296	0.998	366	G1(5.5)	1		1			1
chr6	136172833	136516712	344	6q23.3	PDE7B	0.164	1	351	S2(4.2)	0
chr2	197831740	198175897	344	2q33.1	ANKRD44	0.259	0.962	331	S1(4.6)	0
chr1	164524820	164868533	344	1q23.3	PBX1	0.973	0.972	334	S3(2.7)	0
chr2	166813908	167158294	344	2q24.3	AC010127.3	0.024	0.414	143	S2(3.7)	0
chr15	28000020	28344504	344	15q12-13	OCA2	0.001	0	0	S4(2.2)	0
chr12	124457787	124800570	343	12q24.31	FAM101A	0.117	0.431	120	S2(4.3)	0
chr6	70576462	70919679	343	6q13	COL19A1	0	0	0	S4(1.5)	0
chr1	107682628	108026080	343	1p13.3	NTNG1	0.75	1	352	G2(1.4)	0
chr12	107712189	108053419	341	12q23.3	BTBD11	0.022	0.987	339	S3(2.8)	0
chr4	148653213	148993931	341	4q31.23	ARHGAP10	2	1	390	S1(4.8)	0
chr2	185463092	185804219	341	2q32.1	ZNF804A	0.002	0	0	S4(1.7)	0
chr5	117260702	117601730	341	5q23.1	CTD-3179P9.1	0.001	0	0	S4(1.6)	0
chr13	24553838	24895169	341	13q12.12	RP11-307N16.6	0.145	0.963	329	S1(5)	0
chr14	42832185	43172858	341	14q21.1	CTD-2307P3.1	0.002	0.015	5	S4(1.5)	0
chr6	25279305	25620758	341	6p22.2	LRRC16A	0.438	0.999	347	S3(2.6)	0
chr4	41361623	41702061	340	4p13	LIMCH1	0.479	0.997	353	S2(4)	0
chr10	32832296	33171802	340	10p11.22	C10orf68	0.189	1	453	S1(4.8)	0
chr18	66382445	66722426	340	18q22.1	CCDC102B	0.007	0	0	S3(2.9)	0
chr5	80708839	81047616	339	5q14.1	SSBP2	0.825	0.997	363	S2(4.1)	0
chr16	12995476	13334272	339	16p13.12	SHISA9	0	0	0	S4(2.2)	0
chr10	95753745	96092580	339	10q23.33	PLCE1	0.369	1	355	S1(4.7)	0
chr12	70297812	70637140	339	12q15	RP11-611E13.2	0.048	0.435	148	S3(2.8)	0
chr14	57279900	57618895	339	14q22.3	OTX2-AS1	0	0.012	4	S4(2.2)	0
chr7	11221358	11559802	338	7p21.3	AC004538.3	0.004	0	0	S4(1.5)	0
chr4	159236462	159574524	338	4q32.1	RXFP1	0.003	0.068	25	S2(3.6)	0
chr9	20658307	20995954	338	9p21.3	FOCAD	1	0.999	399	S2(3.6)	0
chr6	55921387	56258892	338	6p12.1	COL21A1	0.116	0.217	113	S1(4.8)	0.536			1		1
chr7	95401865	95739634	338	7q21.3	DYNC1I1	0.042	0.967	327	S4(2)	0
chr10	97512962	97849995	337	10q24.1	ENTPD1-AS1	0.063	0.743	251	S3(2.6)	0
chr4	79892901	80229952	337	4q21.21	LINC01088	0.008	0.257	282	S3(2.8)	1		1			1
chr3	43396350	43733086	337	3p21-22	ANO10	0.748	0.998	339	S1(4.6)	0
chr6	45295893	45632086	336	6p21.1	RUNX2	0.282	0.733	244	S1(4.9)	0
chr11	115039937	115375675	336	11q23.3	CADM1	0.001	0.027	9	S4(2.3)	0
chr6	53794779	54131078	336	6p12.1	MLIP	0.008	0.05	148	S3(3.2)	0
chr15	61592524	61927648	335	15q22.2	RP11-507B12.2	0	0	0	S4(2.2)	0
chr2	134877553	135212192	335	2q21.2-3	MGAT5	0.935	0.997	339	S2(3.5)	0
chr6	37787274	38122400	335	6p21.2	ZFAND3	3.701	0.999	400	S1(4.7)	0.006		1			1
chr5	110998317	111333161	335	5q22.1	NREP	0.48	0.941	342	S2(4.2)	0
chrX	131760043	132095423	335	Xq26.2	HS6ST2	0	0	0	S4(1.7)	0
chr3	178244292	178578193	334	3q26.32	RP11-385J1.2	0.014	0.4	134	S3(2.9)	0
chr14	65877309	66210839	334	14q23.3	FUT8	1.441	1	457	S2(3.7)	0
chr6	57179602	57513375	334	6p11.2	PRIM2	4.075	0.979	140	S3(3)	0.378				1	1
chr2	54197974	54532437	334	2p16.2	ACYP2	0.262	1	368	S1(4.9)	0
chr5	64444562	64777747	333	5q12.3	ADAMTS6	3.076	1	373	S1(5.4)	0.017		1			1
chr3	58703091	59035810	333	3p14.2	C3orf67	0.086	1	334	S3(3.3)	0
chr2	196602426	196933536	331	2q32.3	DNAH7	0.01	0.169	56	S2(4.3)	0
chr10	11047258	11378674	331	10p14	CELF2	0.01	0	0	S3(2.5)	0
chrX	73183789	73513409	330	Xq13.2	FTX	0.716	0.961	317	S2(3.9)	0
chr7	16130816	16460947	330	7p21.2	ISPD	0.157	0.999	331	S3(3.2)	0
chr6	149068463	149398126	330	6q25.1	UST	1.051	1	363	S1(4.6)	0
chr5	104253192	104582065	329	5q21.2-3	CTD-2374C24.1	0.001	0.019	6	G2(1.4)	0
chr15	35509545	35838394	329	15q14	DPH6	0.258	0.982	216	S2(3.9)	0
chr8	130363936	130692485	329	8q24.21	CCDC26	0.002	0	0	S2(3.8)	0
chr12	113008183	113336686	329	12q24.13	RPH3A	0.001	0	0	S2(3.9)	0
chr1	227177565	227506175	329	1q42.13	CDC42BPA	1.83	1	339	S2(4)	0
chr7	89511666	89840949	329	7q21.13	STEAP2-AS1	0.007	0.223	60	S3(2.9)	0
chr11	75526211	75854239	328	11q13.5	UVRAG	0.933	0.999	330	S2(4.4)	0
chr7	26706680	27034858	328	7p15.2	SKAP2	0.337	0.606	225	S2(3.7)	0
chr5	115420687	115748459	328	5q23.1	COMMD10	0.447	1	363	S3(3)	0
chr21	34956992	35284635	328	21q22.11	AP000304.12	0.134	0.21	79	S1(5)	0
chr15	81719788	82047558	328	15q25.2	CTD-2034I4.1	0.001	0	0	S3(3)	0
chr8	74332603	74659943	327	8q21.11	STAU2	0.23	0.999	332	S1(4.6)	0
chr2	53759809	54087170	327	2p16.2	GPR75-ASB3	0.415	0.729	239	S2(3.7)	0
chr13	24553943	24881212	327	13q12.12	SPATA13	0.151	1	329	S1(5)	0
chr3	64670584	64997143	327	3p14.1	ADAMTS9-AS2	0.006	0.119	39	S3(3.1)	0
chr17	67573391	67899141	326	17q24.3	AC003051.1	0.002	0	0	S2(4)	0
chr10	65424423	65750328	326	10q21.3	RP11-170M17.1	0.001	0	0	S1(4.7)	0
chr9	109040672	109367076	326	9q31.2	RP11-308N19.1	0.001	0.009	3	S4(1.9)	0
chrX	113818550	114144624	326	Xq23	HTR2C	0	0	0	S3(2.7)	0
chr8	139600477	139926249	326	8q24.23-3	COL22A1	0	0	0	G2(1.4)	0.944		1			1
chr5	20611948	20937800	326	5p14.3	RP11-774D14.1	0.001	0	0	G2(1.3)	0
chr17	9153787	9479908	326	17p13.1	STX8	0.338	1	340	S4(2.2)	0
chr4	101944565	102269435	325	4q24	PPP3CA	1.862	0.997	337	S3(3.2)	0
chr10	35535952	35860852	325	10p11.21	CCNY	1.291	0.749	250	S2(4.4)	0
chr3	117391000	117716439	325	3q13.32	RP11-384F7.2	0.243	1	2201	S3(3.1)	1		1		1	2
chr17	35441922	35766909	325	17q12	ACACA	0.983	1	335	S1(5)	0
chr15	50150434	50475014	325	15q21.2	ATP8B4	0.041	0.888	343	S1(4.6)	0
chr5	137946655	138270723	324	5q31.2	CTNNA1	1.874	0.562	199	S1(4.8)	0
chr3	130745693	131069309	324	3q22.1	NEK11	0.129	1	335	S4(2.3)	0
chr8	68334359	68658620	324	8q13.2	CPA6	0.002	0	0	S3(3)	0
chr2	190744334	191068210	324	2q32.2	C2orf88	0.032	0.253	139	S1(4.6)	0
chr15	44162961	44487450	324	15q15.3	FRMD5	0.123	1	338	S1(5.3)	0
chr18	46065416	46389588	324	18q21.1	CTIF	1.929	1	381	G1(5.5)	0
chr5	152869174	153193429	324	5q33.2	GRIA1	0.004	0	0	S3(3.2)	0
chr14	27305933	27629626	324	14q12	RP11-384J4.2	0.001	0	0	G2(1.3)	0
chr3	160473389	160796695	323	3q25-26	PPM1L	0.011	0	0	S3(3.1)	0
chr17	11144579	11467380	323	17p12	SHISA6	0	0	0	S4(1.6)	0
chr20	20370195	20693131	323	20p11.23	RALGAPA2	0.138	1	326	S3(2.5)	0
chr2	23608087	23931481	323	2p24.1	KLHL29	0.351	0.996	324	S2(3.9)	0
chr18	34823009	35146000	323	18q12.2	CELF4	0.001	0	0	S4(2.4)	0
chrY	16634517	16957530	323	Yq11.221	NLGN4Y	0	0	0	NULL	0
chr5	134368969	134691744	323	5q31.1	CTC-349C3.1	0.053	1	350	S1(5.4)	0
chr4	13656802	13978699	322	4p15.33	RP11-341G5.1	0.013	0.277	113	S2(3.6)	0
chrX	112859586	113181506	322	Xq23	RP5-964N17.1	0.001	0.019	6	S4(1.6)	0
chr20	10653575	10975572	322	20p12.2	RP11-103J8.1	0.033	0.556	179	S2(4)	0
chr13	33929342	34250905	322	13q13.1-2	RP11-141M1.3	0.02	0.999	326	S1(4.9)	0
chr7	151253196	151574210	321	7q36.1	PRKAG2	0.167	0.577	187	S1(5.4)	0
chr14	76099967	76421421	321	14q24.3	TTLL5	0.385	0.917	425	S2(3.9)	0
chr5	151329131	151650009	321	5q33.1	CTB-12O2.1	0.003	0	0	S2(3.6)	0
chr18	61771324	62090836	320	18q22.1	RP11-146N18.1	0.001	0	0	S4(1.9)	0
chr17	65373574	65693372	320	17q24.2	PITPNC1	0.357	1	335	S1(4.9)	0
chr12	130880681	131200826	320	12q24.33	RIMBP2	0	0	0	S4(1.9)	0
chr7	93220884	93540577	320	7q21.3	GNGT1	0.001	0	0	S2(3.9)	0
chr10	52065359	52384923	320	10q11.23	SGMS1	1.252	1	343	S2(3.6)	0
chr3	66119284	66438540	319	3p14.1	SLC25A26	0.269	0.526	194	S1(4.9)	0
chr12	81331593	81650533	319	12q21.31	ACSS3	0.116	0.614	193	S3(2.8)	0
chr15	92396924	92715665	319	15q26.1	SLCO3A1	0.244	1	327	S4(2.2)	0
chr12	116395710	116715143	319	12q24.21	MED13L	4.556	1	344	S2(4.4)	0
chr3	53528682	53847760	319	3p21.1	CACNA1D	0	0	0	S2(3.5)	0
chr2	169312371	169631644	319	2q24.3	CERS6	0.516	1	331	S3(2.9)	0
chr7	8473584	8792593	319	7p21.3	NXPH1	0	0	0	G2(1.2)	0
chr2	173600001	173917621	318	2q31.1	RAPGEF4	0.021	0.871	188	G1(5.5)	0
chr10	60272899	60591195	318	10q21.1	BICC1	2.404	1	414	S2(4.4)	0
chr8	118806728	119124092	317	8q24.11	EXT1	9.424	1	584	S1(5.3)	0
chr17	70319263	70636611	317	17q24.3	LINC00511	0.384	0.852	277	S1(4.9)	0
chr11	112831996	113149158	317	11q23.2	NCAM1	0	0	0	S4(1.9)	0
chr16	13340172	13656775	317	16p13.12	U91319.1	0	0	0	S4(2.2)	0
chr9	14081841	14398982	317	9p22-23	NFIB	0.005	0	0	S3(2.6)	0
chr12	19556978	19873735	317	12p12.3	AEBP2	0.456	0.868	275	S2(3.5)	0
chr12	111471827	111788358	317	12q24.11-12	CUX2	0	0	0	S2(4.3)	0
chr12	71518864	71835678	317	12q21.1	TSPAN8	0.001	0	0	S4(2.4)	0
chr5	72921982	73237818	316	5q13.2	ARHGEF28	0.632	1	327	S1(5.1)	0
chr15	99192199	99507759	316	15q26.3	IGF1R	2.018	1	327	S2(3.7)	0
chr2	153191750	153506348	315	2q23.3	FMNL2	0.791	1	325	S2(4.2)	0
chr12	20522178	20837315	315	12p12.2	PDE3A	0.015	0.013	4	S3(2.5)	0
chr9	80331002	80646374	315	9q21.2	GNAQ	1.723	1	344	S3(3.4)	0.019			1		1
chr6	38683116	38998301	315	6p21.2	DNAH8	0.001	0	0	S3(3.2)	0
chr5	143550395	143865249	315	5q31.3	KCTD16	0.353	0.895	318	S2(4)	0
chr9	75136716	75451267	315	9q21.13	TMC1	0.011	0.216	68	S2(4.4)	0
chr8	59717976	60031767	314	8q12.1	TOX	2.721	1	354	S2(4.3)	0
chr11	128834954	129149219	314	11q24.3	ARHGAP32	0.472	1	336	S2(3.5)	0
chr1	162039563	162353321	314	1q23.3	NOS1AP	0.006	0	0	S1(4.7)	0
chr15	36231367	36544458	313	15q14	RP11-184D12.1	0.001	0	0	S2(3.8)	0
chr17	13659794	13972812	313	17p12	COX10-AS1	0.113	0.974	305	S3(3.2)	0
chr4	105575030	105887950	313	4q24	RP11-556I14.2	0	0	0	S4(1.8)	0
chr15	35838395	36151202	313	15q14	DPH6-AS1	0.04	1	363	S2(3.8)	0
chr1	233119180	233431459	312	1q42.2	PCNXL2	0.84	1	317	S3(2.7)	0
chr8	121072018	121384275	312	8q24.12	COL14A1	0.217	0.875	258	S2(4.1)	0
chr2	122095351	122407163	312	2q14.2-3	CLASP1	1.264	1	329	S1(4.5)	0
chr3	1134259	1445901	312	3p26.3	CNTN6	0	0	0	G2(1.3)	0
chr3	159631188	159943086	312	3q25.33	IL12A-AS1	0.004	0.052	40	S1(5.2)	0
chr15	77400470	77712486	312	15q24.3	PEAK1	2.809	1	336	S1(4.8)	0.378		1			1
chr9	112403067	112713755	311	9q31.3	PALM2	0.339	0.564	483	S1(5.2)	0
chr10	90033620	90344287	311	10q23.31	RNLS	0.095	0.997	352	S1(4.5)	0
chr4	114372187	114683083	311	4q26	CAMK2D	6.662	1	381	S1(4.8)	0
chr3	177159708	177470093	310	3q26.32	LINC00578	0.003	0	0	S2(4.2)	0
chr2	210288781	210598842	310	2q34	MAP2	0.155	1	314	S3(2.5)	0
chr7	79998890	80308593	310	7q21.11	CD36	0.007	0.146	46	S1(5)	0
chr17	71330522	71640228	310	17q25.1	SDK2	0	0	0	S2(3.9)	0
chr16	47188297	47498060	310	16q12.1	ITFG1	0.876	0.992	318	S3(2.7)	0
chr17	19912656	20222339	310	17p11.2	SPECC1	0.13	0.523	162	S2(3.7)	0
chr3	577913	887698	310	3p26.3	AC090044.1	0	0	0	G2(1.3)	0
chr18	76829284	77138283	309	18q23	ATP9B	0.483	1	327	S4(2.2)	0
chr18	44812095	45120914	309	18q21.1	CTD-2130O13.1	0.021	0.471	168	S4(2.1)	0
chr7	120628730	120937498	309	7q31.31	CPED1	0.768	1	337	S1(4.6)	0
chr21	38979677	39288749	309	21q22.13	KCNJ6	0.001	0	0	S2(4)	0
chr7	107788067	108097161	309	7q31.1	NRCAM	0.013	0.286	93	S2(4.2)	0
chr1	176826437	177134109	308	1q25.2	ASTN1	0.001	0.013	4	S4(1.7)	0
chrX	111017542	111326004	308	Xq23	TRPC5	0.001	0	0	S4(1.9)	0
chr9	129677052	129985445	308	9q33.3	RALGPS1	0.041	1	308	S1(4.9)	0
chr9	3218296	3526004	308	9p24.2	RFX3	0.173	1	311	S3(3)	0
chr20	20033157	20341346	308	20p11.23	C20orf26	0.001	0	0	S2(3.8)	0
chr7	47314751	47622156	307	7p12.3	TNS3	0.25	0.998	342	S1(5.2)	0
chr12	104849072	105155792	307	12q23.3	CHST11	0.722	1	324	S1(4.8)	0
chr13	98794815	99102027	307	13q32.2	FARP1	1.214	0.998	314	S1(4.7)	0
chrX	122318005	122624766	307	Xq25	GRIA3	1.719	1	314	S4(2)	0
chr6	107473760	107780768	307	6q21	PDSS2	0.466	0.984	290	S2(3.5)	0
chr14	26305063	26612511	307	14q12	RP11-314P15.2	0.001	0	0	G2(1.3)	0
chr8	128806778	129113499	307	8q24.21	PVT1	2.316	1	400	S1(5.2)	0
chr11	13983913	14289646	306	11p15.2	SPON1	0	0	0	S1(4.5)	0
chr11	72547789	72853306	306	11q13.4	FCHSD2	1.3	1	349	S1(5.3)	0
chr1	224622361	224928251	306	1q42.12	CNIH3	0.16	1	333	S1(5.1)	0
chr10	16865962	17171830	306	10p13	CUBN	0.122	1	312	G1(5.5)	0
chr2	179390715	179695529	305	2q31.2	TTN	0.001	0	0	S3(3)	0
chr5	75699073	76003957	305	5q13.3	IQGAP2	0	0	0	S1(4.8)	0
chr8	10753554	11058875	305	8p23.1	XKR6	0.057	0.375	115	S3(2.8)	0
chr5	81267843	81572676	305	5q14.1-2	ATG10	0.397	1	308	S2(3.5)	0
chr9	71320574	71624092	304	9q21.11	PIP5K1B	0.021	0.059	18	S2(3.5)	0
chr6	19535174	19839311	304	6p22.3	RP1-167F1.2	0.013	0.155	38	S4(2.4)	0
chr17	27952955	28257294	304	17q11.2	SSH2	0.961	1	308	S1(5.1)	0
chr11	100558383	100862668	304	11q22.1	ARHGAP42	0.226	1	305	S3(3.1)	0.09	1				1
chr16	63348167	63651950	304	16q21	RP11-368L12.1	0.001	0	0	G2(1.3)	0
chr12	64238072	64541613	304	12q14.2	SRGAP1	3.705	1	411	S1(5.2)	0
chr2	189156395	189460653	304	2q32.1-2	GULP1	0.279	1	329	S2(4)	0
chr2	84743578	85046713	303	2p11.2	DNAH6	0	0	0	S1(4.6)	0
chrX	24712035	25015103	303	Xp21-22	POLA1	0.367	1	309	S3(3)	0
chr3	158680716	158984096	303	3q25.32	IQCJ	0.002	0	0	S2(4.2)	0
chr20	9518035	9819689	302	20p12.2	PAK7	0	0	0	S3(3)	0
chr19	38397867	38699012	301	19q13.13	SIPA1L3	0.922	1	337	S1(4.9)	0
chr7	51083908	51384515	301	7p12.1	COBL	0	0	0	S3(2.5)	0
chr20	16252748	16554078	301	20p12.1	KIF16B	0.169	1	306	S4(1.8)	0
chr7	151832009	152133090	301	7q36.1	KMT2C	1.63	1	315	S3(3.1)	0
chr10	131265447	131566271	301	10q26.3	MGMT	0.149	1	303	S4(1.5)	0
chr1	90098698	90398809	300	1p22.2	RP11-302M6.4	0.55	0.827	137	S1(5.1)	0
chr11	43577985	43878167	300	11p11.2	HSD17B12	0.728	0.922	301	S2(3.8)	0
chr2	217559186	217858802	300	2q35	AC007563.5	0.001	0.01	3	S1(4.6)	0
chr2	48168834	48468122	299	2p16.3	AC079807.4	0.001	0	0	S3(3.3)	0
chr10	64926980	65225722	299	10q21.3	JMJD1C	2.152	1	371	S2(3.7)	0
chr4	98255785	98554974	299	4q22.3	RP11-681L8.1	0.005	0	0	G2(1.3)	0
chr2	111953926	112252677	299	2q13	MIR4435-1HG	0.33	1	308	S1(5.1)	0
chr21	47063607	47362368	299	21q22.3	PCBP3	0.005	0	0	S1(5.2)	0
chr10	64133950	64431771	298	10q21.2	ZNF365	0.023	0.163	33	S1(4.5)	0
chr5	42423878	42721979	298	5p12-13	GHR	0.114	0.998	299	S4(2.4)	0
chr2	181966658	182264286	298	2q31.3	AC104820.2	0.022	0.218	186	S3(3.3)	0
chr2	160175489	160473203	298	2q24.2	BAZ2B	0.899	1	330	S1(4.8)	0
chr10	49892920	50191001	298	10q11.22-23	WDFY4	0	0	0	S2(3.7)	0
chr1	222262510	222560776	298	1q41	RP11-400N13.1	0.005	0	0	S2(4.2)	0.053			1		1
chr14	58466452	58764857	298	14q23.1	C14orf37	0.466	0.846	158	S2(4)	0
chr17	46210801	46507637	297	17q21.32	SKAP1	0.001	0	0	S1(5.1)	0
chr4	85590703	85887544	297	4q21.23	WDFY3	1.806	1	338	S3(2.7)	0
chr6	157802164	158099178	297	6q25.3	ZDHHC14	0.173	0.999	303	S1(4.8)	0
chr7	132469628	132766848	297	7q32-33	CHCHD3	0.931	1	310	S3(3.1)	0
chr14	42076772	42373752	297	14q21.1	LRFN5	0.003	0	0	G2(1.4)	0
chr14	66679527	66976112	297	14q23.3	RP11-72M17.1	0.008	0.185	55	S4(2.3)	0
chr4	35949842	36246131	296	4p14	ARAP2	0	0	0	G2(1.2)	0
chr8	89044236	89340254	296	8q21.3	MMP16	0.428	1	362	S4(2.2)	0
chr2	25600066	25896503	296	2p23.3	DTNB	0.095	1	298	S1(4.8)	1			1		1
chr15	72114631	72410918	296	15q23	MYO9A	1.335	0.999	314	S1(5.1)	0
chrX	107386779	107682727	296	Xq22.3	COL4A6	0.009	0.294	87	S3(2.5)	0
chr9	85857904	86153461	296	9q21.32	FRMD3	0.237	1	309	S4(2.2)	0
chr9	103790990	104087417	296	9q31.1	LPPR1	0	0	0	S3(2.8)	0
chr9	95087765	95382815	295	9q22.31	CENPP	0.181	1	309	S1(4.8)	0
chr1	113933370	114228545	295	1p13.2	MAGI3	0.567	1	339	S2(3.9)	0
chr10	98757794	99052413	295	10q24.1	ARHGAP19-SLIT1	0.074	0.258	77	S1(4.7)	0
chr9	79226291	79521003	295	9q21.2	PRUNE2	0.573	1	308	S2(3.6)	0
chr2	168810529	169104651	294	2q24.3	STK39	1.686	0.999	317	S3(3.1)	0
chr5	77296348	77590579	294	5q14.1	AP3B1	1.779	1	320	S2(4.1)	0
chr6	143857981	144152322	294	6q24.2	PHACTR2	1.834	1	328	S2(4.3)	0
chr15	49619158	49913128	294	15q21.2	FAM227B	0.028	0.373	108	S1(4.8)	0
chr8	71021996	71316040	294	8q13.3	NCOA2	1.178	0.995	303	S3(2.9)	0
chr3	67410883	67705038	294	3p14.1	SUCLG2	1.327	1	419	S4(2.4)	0
chr5	106712589	107006596	294	5q21.3	EFNA5	0.39	1	310	S3(2.9)	0
chr20	45523262	45817492	294	20q13.12	EYA2	0.095	0.999	316	S1(4.6)	0
chr13	99445740	99738879	293	13q32.3	DOCK9	0.257	0.999	297	S2(4.1)	0
chr11	31833938	32127301	293	11p13	RCN1	0.104	0.05	18	S3(3.4)	0
chr6	147981838	148275073	293	6q24.3	RP11-307P5.1	0.001	0	0	S3(3.4)	0
chr3	67705120	67998137	293	3p14.1	RP11-81N13.1	0.066	0.837	247	S3(2.6)	0
chr9	84887670	85179347	292	9q21.32	RP11-15B24.5	0.011	0.486	144	S3(3.1)	0
chr6	133561735	133853258	292	6q23.2	EYA4	0	0	0	S2(3.8)	0
chr16	65318401	65610203	292	16q21	LINC00922	0.002	0	0	S3(3.4)	0
chr1	183605219	183897665	292	1q25.3	RGL1	0.582	1	301	S1(5.1)	0
chr19	28926294	29218684	292	19q12	AC005307.3	0	0	0	S4(1.6)	0
chr21	27252860	27543446	291	21q21.3	APP	1.625	0.997	332	S3(2.9)	0
chr22	40440820	40731812	291	22q13.1	TNRC6B	0.6	1	303	S1(4.7)	0
chr12	63037761	63328817	291	12q14.1-2	PPM1H	0.018	0.508	149	S1(5.2)	0
chr1	231664398	231954990	291	1q42.2	TSNAX-DISC1	0.264	1	580	S3(3.3)	0
chr22	36134782	36424473	290	22q12.3	RBFOX2	2.241	1	304	S1(5.2)	0
chr8	72740401	73030628	290	8q13.3	RP11-383H13.1	0.293	0.945	354	S2(3.9)	0
chr1	45482070	45771881	290	1p34.1	ZSWIM5	0.007	0.174	85	S1(4.6)	0
chr2	208104587	208394519	290	2q33.3	AC007879.5	0.126	1	292	S1(5.3)	0
chr13	100258918	100549387	290	13q32.3	CLYBL	0.022	0.701	233	S3(3.4)	0
chr18	22641889	22932154	290	18q11.2	ZNF521	0.48	1	304	S3(3.1)	0
chr5	159990126	160279221	289	5q34	ATP10B	0	0	0	S3(2.5)	0
chr7	104751150	105039755	289	7q22.3	SRPK2	1.826	0.964	284	S1(5.2)	0
chr22	26138110	26427007	289	22q12.1	MYO18B	0.001	0	0	S3(2.7)	0
chr14	82207345	82496693	289	14q31.1	RP11-666E17.1	0.002	0.01	3	G2(1.4)	0
chr15	56922378	57210769	288	15q21.3	ZNF280D	0.545	1	290	S1(4.5)	0
chr3	107241782	107530171	288	3q13.12	BBX	0.739	0.994	294	S3(3.4)	0
chr17	9813925	10101868	288	17p13.1	GAS7	0.103	0.999	288	S3(2.8)	0
chr4	73146685	73434516	288	4q13.3	ADAMTS3	0.01	0.17	49	S4(2.3)	0
chr11	35965530	36253686	288	11p13	LDLRAD3	0.266	1	297	S1(4.6)	0
chr1	172745044	173033155	288	1q24-25	RP1-15D23.2	0.003	0.08	23	G1(5.5)	0
chr3	16844158	17132086	288	3p24.3	PLCL2	0.216	0.714	225	S2(3.5)	0
chr11	4726156	5013659	288	11p15.4	MMP26	0	0	0	S4(2.4)	0
chr6	22744623	23032009	287	6p22.3	RP1-209A6.1	0.001	0	0	S3(2.9)	0
chr6	114376749	114664209	287	6q21-22	HS3ST5	0.001	0	0	S3(2.9)	0
chr8	22570768	22857513	287	8p21.3	PEBP4	0.007	0.174	69	S1(5.3)	0
chr17	29421944	29709134	287	17q11.2	NF1	1.57	1	319	S1(5.2)	0
chr2	159027592	159313265	286	2q24.1	CCDC148	0.031	1	321	S3(3.1)	0
chr11	86748885	87034800	286	11q14.2	TMEM135	0.66	1	335	S2(4.1)	0
chr4	115748918	116035032	286	4q26	NDST4	0.001	0	0	G2(1.3)	0
chr21	35445891	35732332	286	21q22.11	AP000320.7	0.509	0.889	255	S2(4.4)	0
chrX	149106845	149392815	286	Xq28	LINC00894	0.119	0.892	255	S1(4.6)	0
chr4	19173957	19458617	285	4p15.31	RP11-3J1.1	0.001	0	0	S3(3.3)	0
chr5	77781037	78065844	285	5q14.1	LHFPL2	0.39	1	302	S1(5.2)	0
chr1	84041458	84326706	285	1p31.1	RP11-475O6.1	0	0.001	138	S3(2.6)	0
chrX	151334705	151619830	285	Xq28	GABRA3	0	0	0	S4(1.8)	0
chr7	82993221	83278326	285	7q21.11	SEMA3E	0.002	0	0	S4(2.3)	0
chr3	11313994	11599139	285	3p25.3	ATG7	0.855	1	315	S1(5.1)	0
chr1	94027346	94312706	285	1p22.1	BCAR3	2.83	1	307	G1(5.5)	0
chr8	68864352	69149265	285	8q13.2	PREX2	0.002	0	0	S3(2.5)	0
chr6	117639373	117923691	284	6q22.1	GOPC	0.169	0.169	48	S1(4.8)	0
chr12	29653772	29937692	284	12p11.22	TMTC1	0	0	0	S3(3.3)	0
chr7	47735327	48019178	284	7p12.3	HUS1	0.159	0.249	71	S1(5.4)	0
chr1	92974252	93257961	284	1p22.1	EVI5	0.969	0.977	299	S1(4.8)	0
chr22	43924623	44208217	284	22q13.2-31	EFCAB6	0.03	0.521	148	S3(3.4)	0
chr3	99548984	99833357	284	3q12.1	FILIP1L	0.8	0.219	158	S1(5.3)	0
chr4	9772776	10056560	284	4p16.1	SLC2A9	0.025	0.712	202	S3(2.7)	0
chrX	2137556	2420846	283	Xp22.33	DHRSX	0	0	0	S3(3)	0
chr12	71031852	71314623	283	12q15	PTPRR	0.018	0.112	24	S3(2.8)	0
chr18	18822202	19105378	283	18q11.1-2	GREB1L	0.532	0.999	302	S2(4.1)	0
chr2	61414597	61697904	283	2p15	USP34	2.504	1	309	S1(4.7)	0
chr4	48499377	48782339	283	4p11	FRYL	1.395	1	289	S2(4.2)	0
chrX	110187512	110470589	283	Xq23	PAK3	0.001	0.014	4	S4(2.2)	0
chr10	28339921	28623415	283	10p12.1	MPP7	0.017	0.595	175	S2(4.1)	0
chr13	95672082	95953687	282	13q32.1	ABCC4	0.595	1	317	S3(3.4)	0
chr21	39751948	40033704	282	21q22.2	ERG	0.027	0.987	298	S2(4.3)	0
chr1	12290123	12572099	282	1p36.22	VPS13D	1.208	0.999	297	S1(5)	0
chr12	40019968	40302102	282	12q12	C12orf40	0	0	0	S4(1.5)	0
chr16	76311175	76593135	282	16q23.1	CNTNAP4	0	0	0	G2(1.4)	0
chr13	77618791	77901185	282	13q22.3	MYCBP2	1.333	1	300	S3(3.2)	0
chr5	129240164	129522327	282	5q23.3	CHSY3	0.319	0.999	314	S4(1.6)	0
chr9	20341662	20622542	281	9p21.3	MLLT3	0.522	0.996	289	S2(3.5)	0
chr15	29129628	29410518	281	15q13.1	APBA2	0	0	0	S3(3)	0
chrX	76760355	77041702	281	Xq21.1	ATRX	1.279	1	290	S3(3.3)	0
chrX	21392535	21672813	280	Xp22.12	CNKSR2	0.02	0.71	199	S3(2.9)	0
chr4	106962755	107242652	280	4q24	TBCK	0.712	0.985	295	S3(2.7)	0
chr6	143381632	143661441	280	6q24.2	AIG1	0.276	1	283	S2(4.2)	0
chr12	119825791	120105884	280	12q24.23	RP11-768F21.1	0.008	0.158	224	S3(2.7)	0
chr4	189321889	189602205	280	4q35.2	LINC01060	0.058	0.73	206	S4(2.2)	0
chrX	129757349	130037208	280	Xq26.1	ENOX2	0.206	1	283	S3(2.8)	0
chr8	106792473	107072752	280	8q23.1	RP11-152P17.2	0.002	0	0	S2(3.9)	0
chr4	124571421	124851561	280	4q28.1	RP11-93L9.1	0.003	0	0	S2(4.1)	0
chr6	148593439	148873186	280	6q24.3	SASH1	3.048	1	379	S1(5)	0
chr10	29746266	30025710	279	10p11.23	SVIL	0.47	0.996	285	S1(5)	0
chr9	19507449	19786926	279	9p22.1	SLC24A2	0	0	0	S3(3)	0
chr12	20963635	21243040	279	12p12.2	SLCO1B3	0	0	0	S4(1.6)	0
chr12	106889735	107168696	279	12q23.3	RP11-144F15.1	0.007	0.227	73	S3(3.2)	0
chr2	24714782	24993571	279	2p23.3	NCOA1	0.693	1	287	S2(4.4)	1			1		1
chr10	26223195	26501456	278	10p12.1	MYO3A	0	0	0	S4(1.6)	0
chr8	121547984	121825513	278	8q24.12	SNTB1	0.173	0.996	306	S1(4.6)	0
chr1	77747735	78025651	278	1p31.1	AK5	1.675	1	305	S1(5.4)	0
chr5	128795957	129074376	278	5q23.3	ADAMTS19	0.001	0	0	S4(1.6)	0
chr5	57878047	58155213	277	5q11.2	RAB3C	0	0	0	S3(2.9)	0
chr1	197170591	197447585	277	1q31.3	CRB1	0.048	0.534	149	S3(3.1)	0
chr12	32259768	32536567	277	12p11.21	BICD1	1.085	1	282	S2(4.3)	0
chr2	225629806	225907162	277	2q36.2	DOCK10	3.865	1	313	S1(4.5)	0
chr2	144053154	144329674	277	2q22.2-3	RP11-570L15.2	0.001	0	0	S3(3.1)	0
chr12	20968672	21245679	277	12p12.2	SLCO1B7	0	0	0	S4(1.6)	0
chr4	137039829	137316626	277	4q28.3	RP11-775H9.2	0	0	0	G2(1.4)	0
chrX	127457597	127734446	277	Xq25	RP1-30E17.2	0	0	0	G2(1.2)	0
chr7	116593291	116870157	277	7q31.2	ST7	1.201	0.999	320	S1(5)	0
chr16	72816783	73093597	277	16q22.2-3	ZFHX3	1.622	0.996	298	S2(3.5)	0
chr5	111478137	111755013	277	5q22.1-2	EPB41L4A	0.007	0	0	S3(3.4)	0
chr5	102089684	102366809	277	5q21.1	PAM	2.461	0.997	278	S2(3.8)	0
chr7	42000547	42277469	277	7p14.1	GLI3	0.856	0.997	291	S2(4)	0
chr6	15246526	15522252	276	6p22.3	JARID2	1.629	1	311	S3(3)	0
chr4	78078303	78354542	276	4q21.1	CCNG2	0.053	0.073	20	S2(3.6)	0
chr9	470290	746105	276	9p24.3	KANK1	0.508	0.872	258	S2(3.8)	0
chr16	27798849	28074830	276	16p12.1	GSG1L	0.001	0.027	156	S2(3.6)	0
chr11	108535751	108811657	276	11q22.3	DDX10	0.904	1	293	S2(3.9)	0
chr14	91006931	91282823	276	14q32.11	TTC7B	0.33	0.999	288	S2(3.5)	0
chr5	82373316	82649606	276	5q14.2	XRCC4	0.264	1	329	S3(3.1)	0
chr6	6346697	6623004	276	6p25.1	LY86-AS1	0	0	0	S4(2.2)	0
chr14	60062693	60337684	275	14q23.1	RTN1	0.001	0	0	S3(2.8)	0
chr12	15475330	15750333	275	12p12.3	PTPRO	0.001	0	0	S1(4.5)	0
chr11	5684424	5959849	275	11p15.4	TRIM5	0.036	0.106	67	S3(2.9)	0
chr8	126103920	126379362	275	8q24.13	NSMCE2	0.789	1	293	S1(4.9)	0
chr14	73086003	73360809	275	14q24.2	DPF3	0.324	1	303	G1(5.6)	0
chr7	72023728	72298777	275	7q11.22-23	TYW1B	0.093	0.968	272	S2(3.8)	0
chr4	44175925	44450824	275	4p13	KCTD8	0.003	0	0	S4(1.5)	1		1			1
chr12	20968607	21243179	275	12p12.2	LST3	0	0	0	S4(1.6)	0
chr11	31531296	31805546	274	11p13	ELP4	0.266	1	285	S3(2.8)	0
chr3	156977530	157251408	274	3q25.31-32	VEPH1	0.768	1	304	S1(5.3)	0
chr16	53088944	53363062	274	16q12.2	CHD9	2.081	1	285	S3(2.6)	0
chr8	138821686	139095813	274	8q24.23	RP11-238K6.1	0	0	0	G2(1.4)	0
chr3	123328895	123603178	274	3q21.1	MYLK	0.673	1	299	S1(5.3)	0
chr1	219858768	220131989	273	1q41	SLC30A10	0.001	0.016	93	S3(2.7)	0
chr3	119540169	119813264	273	3q13.33	GSK3B	3.701	1	278	S1(4.8)	0
chr8	80870570	81143467	273	8q21.13	TPD52	0.202	0.264	132	S2(3.9)	0
chr18	58297399	58569959	273	18q21.32	RP11-325K19.1	0.001	0	0	S4(1.7)	0
chr12	80799773	81072802	273	12q21.31	PTPRQ	0.064	0.862	257	S1(5)	0
chr1	95975671	96247898	272	1p21.3	RP11-286B14.1	0.001	0	0	S4(2.2)	0
chr7	105245513	105517050	272	7q22.3	ATXN7L1	0.636	1	276	S1(4.8)	0
chr9	124584206	124855885	272	9q33.2	TTLL11	0.32	0.999	274	S1(5.3)	0
chr3	81538849	81811312	272	3p12.2	GBE1	4.985	1	394	S3(2.9)	0
chr15	87975288	88247083	272	15q25.3	RP11-648K4.2	0.001	0	0	S4(2.4)	0
chr6	138743179	139013708	271	6q23-24	NHSL1	0.223	0.999	277	S3(3.3)	0
chr1	18434239	18704977	271	1p36.13	IGSF21	0	0	0	S4(2.4)	0
chr4	26165076	26436541	271	4p15.2	RBPJ	1.094	0.45	131	S1(5.2)	0
chr1	197473877	197744826	271	1q31.3	DENND1B	0.996	1	314	S2(3.9)	0
chr5	75378996	75649764	271	5q13.3	SV2C	0	0	0	S3(2.8)	0
chr5	16665394	16936372	271	5p15.1	MYO10	4.931	1	283	S1(4.9)	0
chr14	36007557	36278510	271	14q13.2	RALGAPA1	0.918	1	273	S2(4.3)	0
chr6	46188474	46459709	271	6p12-21	RCAN2	0.206	0.999	279	S4(2.3)	0
chr5	17684692	17955966	271	5p15.1	RP11-454P21.1	0.001	0.015	4	S4(2.2)	0
chr4	182795590	183066402	271	4q34.3	AC108142.1	0.101	0.65	176	S2(3.5)	0
chr7	49890016	50160925	271	7p12.2	ZPBP	0.001	0.022	6	G2(1.3)	0
chr5	110559350	110830584	271	5q22.1	CAMK4	0.01	0	0	S3(3.4)	0
chr20	58152563	58422766	270	20q13.32-33	PHACTR3	0.013	0.238	80	S4(2.2)	0
chr9	128199671	128469513	270	9q33.3	MAPKAP1	1.822	1	276	S1(5.1)	0.357		1			1
chr11	12695968	12966298	270	11p15.2-3	TEAD1	4.619	0.998	297	S1(5.3)	0
chr13	102104965	102375456	270	13q33.1	ITGBL1	10.351	1	350	S2(4.1)	0
chr18	24495594	24765281	270	18q11.2	CHST9	0	0	0	G2(1.4)	0
chr11	125034582	125303285	269	11q24.2	PKNOX2	0.002	0	0	S2(4.1)	0
chr12	58937906	59206842	269	12q14.1	RP11-362K2.2	0.005	0	0	S2(4.1)	0
chr15	29991570	30261068	269	15q13.1	TJP1	1.162	0.456	184	S1(4.6)	0
chr5	80256490	80525975	269	5q14.1	RASGRF2	0.002	0	0	S2(4.4)	0
chr7	87563457	87832204	269	7q21.12	ADAM22	0.001	0	0	S4(2.1)	0
chr12	74526945	74796315	269	12q21.1	RP11-81H3.2	0.001	0.011	3	S4(1.5)	0
chr8	133879202	134147147	268	8q24.22	TG	0.041	1	272	S2(4.4)	0
chr10	80166300	80434724	268	10q22.3	LINC00856:2	0.059	0.515	297	S2(4.4)	1				1	1
chr8	124864226	125132302	268	8q24.13	FER1L6	0.001	0	0	S2(4.3)	0
chr3	180320645	180588793	268	3q26.33	CCDC39	0.002	0.014	47	S4(1.8)	0
chr4	147175126	147443123	268	4q31.22	SLC10A7	0.592	1	279	S3(2.6)	0
chr7	37723445	37991543	268	7p14.1	EPDR1	0.04	0.116	158	G2(1.4)	0
chr1	187061973	187329455	267	1q31.1	LINC01036	0.099	1	370	S4(2.2)	0
chr11	122026129	122293579	267	11q24.1	RP11-820L6.1	5.346	0.798	252	S1(5.2)	0
chr10	105348284	105615301	267	10q24.33	SH3PXD2A	0.525	1	274	G1(5.5)	0
chr16	81478774	81745367	267	16q23.2-3	CMIP	1.051	1	281	S1(5)	0
chr2	152689289	152955593	266	2q23.3	CACNB4	0.019	1	271	S2(3.6)	0
chr3	189349204	189615068	266	3q28	TP63	0.002	0	0	S2(3.6)	0
chr18	57098171	57364612	266	18q21.32	CCBE1	1.773	1	337	S1(5.2)	0
chr13	34922179	35188307	266	13q13.2	RP11-16D22.2	0.001	0	0	S4(2.4)	0
chr18	21269406	21535030	266	18q11.2	LAMA3	0.12	1	271	S1(4.9)	0
chr2	168149680	168414843	265	2q24.3	AC074363.1	0.006	0	0	S4(2.3)	0
chr13	32605436	32870794	265	13q13.1	FRY	0.34	1	267	S2(4.4)	0
chr10	123748688	124014060	265	10q26.13	TACC2	0.166	0.533	165	S2(4)	0
chr18	60382671	60647666	265	18q21.33	PHLPP1	0.457	0.997	275	S3(3.2)	0
chr11	89057523	89322779	265	11q14.3	NOX4	0.005	0.23	61	S3(2.8)	0
chr1	83368865	83632498	264	1p31.1	RP4-601K24.1	0.004	0.068	18	S4(1.5)	0
chr2	159825145	160089170	264	2q24.2	TANC1	1.115	0.999	304	S1(4.9)	0
chr4	33777968	34041515	264	4p15.1	RP11-79E3.3	0	0	0	S4(2.3)	0
chr15	67835046	68099461	264	15q23	MAP2K5	0.384	1	277	S1(4.8)	0
chr1	175913966	176176629	263	1q25.1-2	RFWD2	2.05	1	287	S4(2.1)	0
chr5	9641416	9903938	263	5p15.2-31	CTD-2143L24.1	0.002	0	0	S1(4.5)	0
chrX	10865995	11129261	263	Xp22.2	RP11-120D5.1	0.06	1	277	S2(3.7)	0
chr4	118349551	118612343	263	4q26	AC092661.1	0.001	0	0	G2(1.3)	0
chr2	135213329	135476570	263	2q21.3	TMEM163	0.002	0	0	S3(3.1)	0
chr20	34894257	35157040	263	20q11.23	DLGAP4	0.762	0.261	81	S1(5)	0
chr2	42721708	42984087	262	2p21	MTA3	0.505	0.719	263	S1(4.5)	0
chr2	32582095	32843966	262	2p22.3	BIRC6	2.705	1	271	S1(4.6)	0
chr4	178649910	178911904	262	4q34.3	RP11-389E17.1	0	0	0	S4(2.2)	0
chr12	15773091	16035263	262	12p12.3	EPS8	2.509	0.646	204	S1(5.3)	0
chr8	131792546	132054672	262	8q24.22	ADCY8	0.002	0	0	S2(4.2)	0
chr7	102453307	102715286	262	7q22.1	FBXL13	0.026	0.942	247	S1(5.4)	0
chr12	16500075	16762193	262	12p12.3	MGST1	0.496	1	347	S4(2.2)	0
chr12	89441963	89703330	261	12q21.33	RP11-13A1.3	0.005	0.114	62	S1(4.8)	0
chr9	117904096	118164923	261	9q33.1	2014-12-01	0.002	0	0	S1(5.3)	0
chr7	115878313	116139519	261	7q31.2	AC002066.1	0.155	1	297	G1(5.6)	0
chr13	39917028	40177665	261	13q13-14	LHFP	1.001	0.999	395	S3(2.8)	0
chr12	39040623	39301232	261	12q12	CPNE8	0.189	0.993	262	S4(1.5)	0
chr5	160715435	160976050	261	5q34	GABRB2	0	0	0	G2(1.3)	0
chr6	82201155	82462491	261	6q14.1	FAM46A	0.636	1	331	S2(3.8)	0
chr2	150443709	150704747	261	2q23.2-3	AC144449.1	0.039	0.853	223	S2(4.2)	0
chr17	2680349	2941033	261	17p13.3	RAP1GAP2	0.008	0	0	S2(4.1)	0
chr15	83847933	84108197	260	15q25.2	RP11-382A20.4	0.033	0.207	54	S3(3.3)	0
chrX	98716599	98976156	260	Xq22.1	XRCC6P5	0	0	0	S4(1.5)	0
chr4	155153398	155412930	260	4q31.3	DCHS2	0.001	0	0	S4(1.5)	0
chr1	85784163	86043933	260	1p22.3	DDAH1	11.073	1	301	G1(5.6)	0.403		1			1
chr2	158733213	158992666	259	2q24.1	UPP2	0.004	0.074	17	S3(3.1)	0
chr18	24916342	25175128	259	18q11-12	RP11-739N10.1	0	0	0	G2(1.4)	0
chr2	62115858	62374382	259	2p15	COMMD1	0.501	1	281	S2(4.1)	0
chr3	27151575	27410951	259	3p24.1	NEK10	4.695	1	341	S1(4.5)	0
chr10	74127097	74385899	259	10q22.1	MICU1	0.91	1	272	S1(5.3)	0
chr3	74311718	74570291	259	3p12.3	CNTN3	1.659	1	397	S3(2.6)	0
chr20	17206751	17465223	258	20p12.1	PCSK2	0	0	0	S1(4.6)	0
chr11	29357424	29615842	258	11p14.1	RP11-460B17.3	0.002	0.008	46	S2(4.3)	0
chrX	107683073	107940775	258	Xq22.3	COL4A5	0.125	1	263	S4(2.3)	0
chr10	37414784	37673039	258	10p11.21	ANKRD30A	0.001	0.019	5	S4(1.5)	0
chr1	180601139	180859387	258	1q25.3	XPR1	0.782	1	275	S1(4.8)	0
chr12	103631368	103889749	258	12q23.2-3	C12orf42	0.001	0.012	3	S4(2.3)	0
chr5	6933782	7190925	257	5p15.31	RP11-122F24.1	0	0	0	S4(2.2)	0
chr13	76123908	76381256	257	13q22.2	RP11-29G8.3	12.298	0.992	235	S1(5.1)	0.492		1			1
chr16	29262828	29519817	257	16p11.2	SNX29P2	0.002	0	0	S1(5.4)	0
chr3	196769430	197026171	257	3q29	DLG1	2.497	0.997	269	S1(4.9)	0
chr3	185823456	186080026	257	3q27.2-3	DGKG	0.017	0.031	71	S2(3.6)	0
chr2	121493198	121750229	257	2q14.2	GLI2	0.788	1	277	S1(5.2)	0
chr15	93855785	94112712	257	15q26.1	RP11-266O8.1	0	0	0	S4(2.1)	0
chr2	170683967	170940641	257	2q31.1	UBR3	1.786	1	279	S3(3.2)	0
chr21	35014705	35272165	257	21q22.11	ITSN1	1.143	0.869	224	S1(5)	0
chr11	103777913	104035107	257	11q22.3	PDGFD	0.036	1	260	S3(3.3)	0
chr4	160025329	160281321	256	4q32.1	RAPGEF2	0.963	1	269	S1(4.7)	0
chr3	126423062	126679249	256	3q21.3	CHCHD6	0.261	1	261	S2(3.8)	0
chr10	14560555	14816896	256	10p13	FAM107B	0.526	0.335	118	S1(4.7)	0
chrX	9431334	9687780	256	Xp22.2-31	TBL1X	0.38	0.992	264	S2(3.8)	0
chr15	51329684	51586109	256	15q21.2	RP11-108K3.1	0.009	0.042	140	S1(4.5)	0
chr3	127872296	128127485	255	3q21.3	EEFSEC	0.255	1	304	S1(4.9)	0
chr19	42901279	43156507	255	19q13.2	LIPE-AS1	0.049	0.741	189	S1(4.9)	0
chr11	116714117	116969153	255	11q23.3	SIK3	1.048	1	259	S1(5.3)	0
chr6	121400639	121655891	255	6q22.31	TBC1D32	0.357	1	300	S3(2.6)	0
chr2	221315399	221569286	254	2q35-36	AC067956.1	0.002	0	0	S3(3.2)	0
chr5	95860970	96115299	254	5q15	CAST	1.565	1	824	S1(5.1)	0
chr6	122793075	123047518	254	6q22.31	PKIB	0.004	0	0	S4(2.2)	0
chr10	116190871	116444762	254	10q25.3	ABLIM1	0.054	1	394	S2(4.4)	0
chr5	13690439	13944652	254	5p15.2	DNAH5	0.026	0.831	279	S1(5.2)	0
chr14	64550949	64804830	254	14q23.2-3	ESR2	0.002	0.06	16	S1(4.9)	0
chr9	127279553	127533589	254	9q33.3	NR6A1	0.041	0.996	254	G1(5.5)	0
chr5	96519302	96772921	254	5q15	RP11-155G15.2	0.099	1	322	S2(3.6)	0
chr4	152330367	152584784	254	4q31.3	FAM160A1	0.001	0	0	S3(3.4)	0
chr15	73344050	73597547	253	15q24.1	NEO1	0.149	0.994	253	S3(3.2)	0
chr2	226265363	226518734	253	2q36.3	NYAP2	0.001	0	0	S3(3.4)	0
chr10	7200585	7453450	253	10p14	SFMBT2	0.002	0	0	S4(2.2)	0
chr2	179385909	179639402	253	2q31.2	TTN-AS1	0.021	0.215	55	S3(3.2)	0
chr11	49580097	49831971	252	11p11.12	RP11-707M1.1	0	0	0	G2(1.4)	0
chr2	34608854	34860407	252	2p22.3	AC073218.1	0.001	0	0	G2(1.4)	0
chr3	172607147	172859058	252	3q26.31	SPATA16	0	0	0	S2(3.5)	0
chr4	143854347	144106014	252	4q31.21	RP11-284M14.1	0.031	1	276	S3(3.4)	0
chr13	96453833	96705736	252	13q32.1	UGGT2	1.002	1	292	S3(3.2)	0
chr2	58134785	58387055	252	2p16.1	VRK2	0.395	0.45	122	S3(3.1)	0
chr7	33944522	34195484	251	7p14.3	BMPER	2.311	1	295	S1(4.7)	0
chr3	182895830	183146566	251	3q27.1	MCF2L2	0.001	0.012	3	S2(3.5)	0
chr5	91745962	91996570	251	5q14.3	RP11-133F8.2	0.008	0.164	41	S3(3.2)	0
chr9	140513443	140764468	251	9q34.3	EHMT1	0.931	1	254	S1(4.5)	0
chr10	97071527	97321171	250	10q24.1	SORBS1	0.008	0	0	S1(4.5)	0
chr7	117105837	117356025	250	7q31.2	CFTR	0.005	0.131	173	S3(3.3)	0
chr2	149632818	149883273	250	2q23.1	KIF5C	0.002	0	0	S3(2.7)	0
chr5	64064756	64314590	250	5q12.3	CWC27	0.547	1	252	S1(5.2)	1		1			1
chr9	214853	465259	250	9p24.3	DOCK8	0.002	0.04	10	S3(3.4)	0
chr2	54950635	55199157	249	2p16.1-2	EML6	0.03	0.992	248	S1(5.3)	0
chr4	42410389	42659122	249	4p13	ATP8A1	0.018	0.75	187	S4(1.5)	0
chr15	53805937	54055075	249	15q21.3	WDR72	0	0	0	S4(1.5)	0
chr9	118916082	119164601	249	9q33.1	PAPPA	0.884	1	254	S1(4.6)	0
chr6	4706392	4955785	249	6p25.1	CDYL	1.493	0.747	254	S2(4.3)	0
chr15	94774766	95023632	249	15q26.2	MCTP2	0.092	1	251	S3(2.5)	0
chr8	108261720	108510283	249	8q23.1	ANGPT1	0.953	1	303	S2(4.1)	0
chr6	118781934	119031238	249	6q22.31	CEP85L	1.285	1	255	S2(4)	0
chr1	46252658	46501796	249	1p34.1	MAST2	0.888	0.936	244	S1(5.1)	0
chr2	131862419	132111282	249	2q21.1	PLEKHB2	0.249	0.189	60	S3(3)	0
chr2	152341849	152591001	249	2q23.3	NEB	0.006	0	0	S2(3.5)	0
chr7	124569926	124819369	249	7q31.33	RP11-3B12.1	0.009	0.14	35	S4(1.9)	0
chr12	72332625	72580398	248	12q21.1	TPH2	0.001	0.016	104	S2(3.6)	0
chr4	37892707	38140796	248	4p14	TBC1D1	0.371	0.654	172	S1(4.7)	0
chr5	21341941	21589481	248	5p14.3	GUSBP1	0.058	0.521	139	G2(1.3)	0
chr12	77718420	77966055	248	12q21.2	RP1-34H18.1	0.348	1	674	S3(3.3)	0
chr7	38423304	38671167	248	7p14.1	AMPH	0.246	1	254	S4(2.4)	0
chr10	120967100	121215131	248	10q26.11	GRK5	0.685	0.998	261	G1(5.6)	0
chr13	33677271	33924767	247	13q13.1	STARD13	1.985	1	252	S1(4.6)	0
chr15	67547137	67794598	247	15q23	IQCH	0.049	0.89	221	S1(5)	0
chr2	48757063	49003654	247	2p16.3	STON1-GTF2A1L	0.108	0.675	167	S3(3.2)	0
chr2	192813768	193060435	247	2q32.3	TMEFF2	0.044	0.992	247	S2(4)	0
chr15	98589895	98836406	247	15q26.3	CTD-2544M6.1	0	0	0	S4(2.4)	0
chr12	19282647	19529334	247	12p12.3	PLEKHA5	0.657	0.997	262	S2(3.5)	0
chr12	32552462	32798984	247	12p11.21	FGD4	0.703	0.456	122	S2(4.3)	0
chr9	140772240	141019076	247	9q34.3	CACNA1B	0.002	0	0	S3(3.3)	0
chr10	80828791	81076276	247	10q22.3	ZMIZ1	1.675	0.997	266	S1(5.4)	0.183				1	1
chr10	22045465	22292698	247	10p12.31	DNAJC1	1.027	1	294	S3(3.1)	0
chr1	44870865	45117396	247	1p34.1	RNF220	0.042	0.081	21	S1(5.1)	0
chr4	112748036	112993854	246	4q25	RP11-269F21.3	0.001	0	0	S3(3.3)	0
chr3	42850937	43097363	246	3p22.1	KRBOX1	0.038	0.252	43	S2(3.7)	0
chr3	6532165	6777816	246	3p26.1	AC069277.2	0	0	0	G2(1.3)	0
chr12	11802787	12048336	246	12p13.2	ETV6	0.728	1	255	S2(4.2)	0
chrX	109437413	109683461	246	Xq23	AMMECR1	0.559	0.508	147	S1(5.2)	0
chr3	118619403	118864915	246	3q13.32	IGSF11	0.014	0.352	182	S2(3.8)	0
chr10	134351323	134596979	246	10q26.3	INPP5A	0.453	1	248	S1(4.5)	0
chr8	81540685	81787016	246	8q21.13	ZNF704	0.001	0	0	S3(2.5)	0
chr10	128113565	128359079	246	10q26.2	C10orf90	0.017	0.142	38	S2(3.6)	0.284	1				1
chr3	129366634	129612419	246	3q22.1	TMCC1	1.145	1	270	S1(5.1)	0
chr2	101624078	101869328	245	2q11.2	TBC1D8	0.197	0.768	147	S1(4.9)	0
chr9	72042445	72287222	245	9q21.11-12	APBA1	0.249	1	247	S2(4.4)	0
chr6	24797600	25042238	245	6p22.3	FAM65B	0.264	0.466	131	S2(3.9)	0
chr4	100871162	101116256	245	4q23-24	RP11-15B17.1	0.006	0.148	36	S2(4)	0
chr12	68383224	68628466	245	12q15	IFNG-AS1	0.001	0	0	S2(4)	0
chr22	25348696	25593415	245	22q11.23	KIAA1671	0.069	1	247	S3(2.7)	0
chr1	199117725	199362435	245	1q32.1	RP11-382E9.1	0.001	0	0	S3(3.1)	0
chr2	31133332	31378068	245	2p23.1	GALNT14	0.001	0	0	S3(3.3)	0
chr6	169857306	170102159	245	6q27	WDR27	0.248	1	265	S2(3.7)	0
chr8	41510738	41754280	244	8p11.21	ANK1	0.023	0.599	147	S1(4.8)	0
chr1	243419319	243663394	244	1q43	SDCCAG8	1.329	1	290	S3(3.2)	0
chr3	100467999	100712359	244	3q12.2	ABI3BP	0.899	1	271	S1(4.5)	0
chr10	93806448	94050844	244	10q23.32	CPEB3	0.245	0.995	278	S1(4.6)	0
chr13	88079468	88323514	244	13q31.2	MIR4500HG	0.001	0	0	G2(1.3)	0
chr12	117645946	117889975	244	12q24.22	NOS1	0	0	0	S3(2.5)	0
chr14	80677761	80921812	244	14q31.1	DIO2-AS1	0.001	0	0	S2(4.3)	0
chr9	79792268	80036457	244	9q21.2	VPS13A	0.528	0.999	249	S3(3.4)	0
chr2	21540531	21784185	244	2p24.1	AC011752.1	0	0	0	S4(2.3)	0
chr1	202317826	202561834	244	1q32.1	PPP1R12B	0.299	1	264	S1(5.1)	0
chr12	50898767	51142450	244	12q13.12	DIP2B	0.936	1	252	S1(5.2)	0
chr17	1963132	2207065	244	17p13.3	SMG6	0.993	1	259	G1(5.5)	0
chrX	71549365	71792953	244	Xq13.1	HDAC8	0.291	0.998	263	S2(4.1)	0
chr7	66460159	66704501	244	7q11.21	TYW1	0.16	1	258	S1(5)	0
chr3	111451343	111695364	244	3q13.2	PHLDB2	0.551	0.537	119	G1(5.5)	0
chr4	47596014	47840123	244	4p12	CORIN	0.005	0.039	16	S2(3.7)	0
chr6	150920998	151164799	244	6q25.1	PLEKHG1	0.003	0	0	S2(4)	0
chr12	124808960	125052135	243	12q24.31	NCOR2	0.82	0.997	259	S1(4.7)	0
chr9	35161998	35405335	243	9p13.3	UNC13B	0.262	1	266	S1(4.7)	0
chr17	58256454	58499831	243	17q23.1-2	USP32	1.26	0.875	222	S1(5.3)	0
chr7	139476849	139720125	243	7q34	TBXAS1	0.013	0.099	24	S1(4.7)	0
chr4	6322304	6565327	243	4p16.1	PPP2R2C	0.004	0	0	S2(3.6)	0
chr22	49808175	50051190	243	22q13.33	C22orf34	0	0	0	S3(3.2)	0
chr3	84687556	84930830	243	3p12.1	LINC00971	0	0	0	G2(1.2)	0
chr16	74088049	74330660	243	16q22-23	AC009120.4	0.006	0.071	89	S3(3.2)	0
chr3	73431583	73674091	243	3p13	PDZRN3	1.952	1	250	S2(4.3)	0
chr16	68877506	69119083	242	16q22.1	TANGO6	0.483	1	263	S1(5.2)	0
chr8	36394908	36636682	242	8p11-12	RP11-962G15.1	0	0	0	S3(3.2)	0
chr1	184356191	184598154	242	1q25.3	C1orf21	0.651	1	256	S2(4.4)	0
chr3	179512745	179754841	242	3q26.33	PEX5L	0.002	0	0	S3(3)	0
chr14	51955817	52197445	242	14q22.1	FRMD6	10.824	0.992	161	G1(5.7)	0
chr4	54325467	54567572	242	4q12	LNX1	0.145	0.413	108	S1(5.3)	0
chr10	118643741	118886097	242	10q25.3	KIAA1598	0.276	0.498	155	S3(3.1)	0
chr17	10286460	10527203	241	17p13.1	CTC-297N7.11	0.003	0.044	40	S4(2.2)	0
chr5	26880708	27121257	241	5p14.1	CDH9	0.001	0	0	G2(1.3)	0
chr12	15260716	15501609	241	12p12.3	RERG	0.001	0	0	S3(3.1)	0
chr2	189463517	189704171	241	2q32.2	AC079613.1	0.002	0	0	S1(4.9)	0
chr18	20777107	21017925	241	18q11.2	TMEM241	0.157	0.874	212	S1(5.2)	0
chr14	25278861	25519503	241	14q12	STXBP6	0.718	1	260	S3(3.2)	0
chr1	144836156	145076186	240	1q21.1	PDE4DIP	1.717	1	240	S1(5.4)	0
chr1	217804665	218045038	240	1q41	SPATA17	0.025	1	247	S4(2.2)	0
chr3	184529930	184770402	240	3q27.2	VPS8	0.671	1	252	S2(4.1)	0
chr2	171847332	172087824	240	2q31.1	TLK1	1.923	0.708	191	S1(5)	0
chr16	47495033	47735434	240	16q12.1	PHKB	0.723	1	262	S3(3.1)	0
chr2	98372798	98612388	240	2q11.2	TMEM131	1.67	1	258	S3(3.2)	0
chr16	72459383	72698908	240	16q22.2	AC004158.2	0.125	1	440	S3(2.8)	0
chr6	80816363	81055987	240	6q14.1	BCKDHB	0.458	1	250	S3(3.2)	0
chrX	44732756	44971847	239	Xp11.3	KDM6A	2.042	1	270	S3(3.2)	0
chr7	22157855	22396763	239	7p15.3	RAPGEF5	0.022	1	248	S3(3.4)	0
chr12	25562240	25801513	239	12p12.1	IFLTD1	0.023	0.752	181	S1(4.7)	0
chr15	100017369	100256671	239	15q26.3	MEF2A	1.723	0.687	160	S2(4.1)	0
chr9	43684901	43924049	239	9p11.2	CNTNAP3B	0	0	0	S4(1.6)	0
chr12	86993354	87232775	239	12q21.32	RP11-202H2.1	0	0	0	S4(2.1)	0
chr11	3875756	4114439	239	11p15.4	STIM1	0.495	0.997	239	S1(4.9)	0
chr12	18233802	18473041	239	12p12.3	RERGL	0.004	0	0	S4(2.4)	0
chr2	56374764	56613306	239	2p16.1	RP11-482H16.1	1.113	0.846	230	S3(2.9)	0
chr3	47892181	48130769	239	3p21.31	MAP4	3.168	0.999	248	G1(5.5)	0
chr19	29777917	30016659	239	19q12	CTC-525D6.1	0	0	0	S4(2.4)	0
chr21	38123188	38362536	239	21q22.13	HLCS	0.462	1	252	S1(4.5)	0
chr4	147627789	147867034	239	4q31.22	TTC29	0	0	0	S3(2.5)	0
chr13	76194569	76434004	239	13q22.2	LMO7	16.633	0.992	235	S1(4.9)	0.234		1			1
chr1	37261127	37499730	239	1p34.3	GRIK3	0	0	0	S3(2.8)	0
chr8	16534413	16772553	238	8p22	RP11-13N12.1	0.004	0	0	S2(4.1)	0
chr4	121606073	121844025	238	4q27	PRDM5	0.458	1	369	S4(2.2)	0
chr5	127039081	127277326	238	5q23.2	CTC-228N24.1	0.001	0	0	S1(4.5)	0
chr18	5392382	5630699	238	18p11.31	EPB41L3	0.085	0.634	158	S4(2)	0
chr5	78293437	78531861	238	5q14.1	DMGDH	0.034	1	251	S2(4.1)	0
chr15	59427112	59665099	238	15q22.2	MYO1E	2.931	1	292	S1(4.5)	0
chr7	55086713	55324313	238	7p11.2	EGFR	1.784	0.838	199	S1(5)	0
chr9	37120535	37358146	238	9p13.2	ZCCHC7	1.097	1	281	S2(4.4)	0
chr15	48700502	48938046	238	15q21.1	FBN1	14.535	1	314	G1(5.6)	0
chr16	11038344	11276046	238	16p13.13	CLEC16A	0.418	0.999	244	S1(5.4)	0
chr8	6264112	6501144	237	8p23.1	MCPH1	0.52	1	240	S2(3.9)	0
chr22	18270414	18507325	237	22q11.21	MICAL3	1.415	1	250	S1(5.4)	0
chr11	5289581	5526847	237	11p15.4	HBE1	0.003	0.067	16	S2(3.5)	0
chr18	21742007	21977844	236	18q11.2	OSBPL1A	0.218	0.999	277	S2(4.2)	0
chr2	169983618	170219195	236	2q31.1	LRP2	0	0	0	S3(2.7)	0
chr6	151186684	151423023	236	6q25.1	MTHFD1L	2.22	1	260	S1(4.7)	0
chr6	78400374	78636691	236	6q14.1	MEI4	0.001	0	0	S4(1.9)	0
chr21	29811666	30047170	236	21q21.3	AF131217.1	0.852	1	446	S2(4.3)	0
chr6	2245981	2482256	236	6p25.2-3	GMDS-AS1	0.131	0.942	223	S2(3.8)	0
chr1	78769567	79005434	236	1p31.1	PTGFR	0.113	0.207	55	S2(4.1)	0
chr2	69240309	69476459	236	2p13.3	ANTXR1	2.01	1	299	S1(5.3)	0
chr6	154331630	154568001	236	6q25.2	OPRM1	0	0	0	S3(2.9)	0
chr11	16799841	17035990	236	11p15.1	PLEKHA7	0.029	0.68	181	S3(3.3)	0
chr1	48226199	48462567	236	1p33	TRABD2B	0.001	0.034	8	S4(2.1)	0
chr6	136878184	137113656	235	6q23.3	MAP3K5	0.335	0.999	242	S2(3.6)	0
chr5	178537851	178772431	235	5q35.3	ADAMTS2	1.786	1	262	S3(3.4)	0
chr13	73987609	74222390	235	13q22.1	LINC00393	0	0	0	S3(3.2)	0
chr16	64398683	64634150	235	16q21	RP11-467L24.1	0.001	0	0	S3(3.1)	0
chr1	169101768	169337205	235	1q24.2	NME7	0.276	1	277	S3(2.5)	0
chr8	135490030	135725292	235	8q24.22	ZFAT	0.351	1	271	S3(2.8)	0
chr14	61201459	61436671	235	14q23.1	MNAT1	1.248	1	407	S1(4.9)	0
chr9	102348067	102582171	234	9q22.33	RP11-554F20.1	0.079	1	245	S2(3.9)	0
chr8	109213444	109447562	234	8q23.1	EIF3E	0.421	0.205	88	S4(2.2)	0
chr12	19928384	20162871	234	12p12.2-3	RP11-405A12.2	0.008	0	0	S3(3.1)	0
chr18	20279443	20513727	234	18q11.2	RP11-739L10.1	0.023	0.308	73	S1(4.8)	0
chr3	162845710	163079351	234	3q26.1	CT64	0.001	0	0	G2(1.2)	0
chr13	38210772	38444562	234	13q13.3	TRPC4	2.334	1	273	S2(3.7)	0
chr10	125465722	125699783	234	10q26.13	CPXM2	0.166	0.637	149	S4(2.2)	0
chr13	49550047	49783915	234	13q14.2	FNDC3A	1.791	1	242	S1(4.7)	0
chr1	62920398	63153969	234	1p31.3	DOCK7	1.941	1	258	S2(4)	0
chr12	11090004	11324172	234	12p13.2	TAS2R14	0.875	1	362	S3(2.5)	0
chr13	73356196	73590591	234	13q22.1	PIBF1	0.807	1	274	S3(3.3)	0
chr16	87117167	87351022	234	16q24.2	C16orf95	0.038	0.541	201	S1(4.8)	0
chr6	145822718	146057160	234	6q24.3	EPM2A	0.078	0.694	163	S3(3.2)	0
chr2	71680851	71913898	233	2p13.2	DYSF	0.014	0.395	63	S3(3.3)	0
chr1	17066767	17299474	233	1p36.13	CROCC	0.041	0.378	91	S1(4.8)	0
chr8	25042237	25275598	233	8p21.2	DOCK5	3.771	1	275	S1(4.7)	0
chr1	29213602	29446553	233	1p35.3	EPB41	0.18	0.992	261	S1(5.1)	0
chr2	216476285	216708445	232	2q35	LINC00607	0.446	1	267	G1(5.5)	0
chrX	142372753	142604631	232	Xq27.3	GS1-256O22.5	0	0	0	G2(1.3)	0
chr11	86152149	86383678	232	11q14.2	ME3	0.175	0.999	258	G1(5.6)	0
chr11	62905338	63137190	232	11q12.3	SLC22A10	0	0	0	S2(3.9)	0
chr4	178366132	178598280	232	4q34.3	RP11-130F10.1	0.011	0.381	92	S2(3.6)	0
chr1	103342022	103574052	232	1p21.1	COL11A1	0.158	1	247	S3(3.1)	0
chr15	59157373	59389618	232	15q22.1-2	RNF111	0.683	0.793	119	S1(4.9)	0
chrX	71130937	71363424	232	Xq13.1	NHSL2	0.049	0.808	189	S2(4.2)	0
chr6	10748026	10979553	232	6p24.2	SYCP2L	0.057	0.551	128	S2(3.6)	1			1		1
chr6	168841830	169073984	232	6q27	SMOC2	0	0	0	S4(1.7)	0
chr7	92234234	92465908	232	7q21.2	CDK6	4.188	1	254	S1(4.9)	0
chr6	108616097	108847999	232	6q21	LACE1	0.233	1	238	S2(3.8)	0
chrY	15360258	15592553	232	Yq11.221	UTY	0	0	0	NULL	0
chr14	76961705	77193055	231	14q24.3	RP11-187O7.3	0.001	0	0	S2(3.8)	0
chr1	215179117	215410436	231	1q41	KCNK2	6.253	1	355	S1(4.9)	0
chr20	51872517	52103813	231	20q13.2	RP4-678D15.1	0.001	0	0	S2(3.9)	0
chr4	166794409	167025047	231	4q32.3	TLL1	0.001	0	0	G2(1.3)	0
chr15	36871811	37102449	231	15q14	C15orf41	1.184	1	295	S1(4.5)	0
chr2	2898819	3129798	231	2p25.3	AC019118.2	0	0	0	S3(2.7)	0
chr11	32133594	32364955	231	11p13	RP1-65P5.1	0	0	0	S3(3.2)	0
chr7	139246315	139477577	231	7q34	HIPK2	1.87	1	237	S1(4.6)	0
chr5	61601988	61833076	231	5q12.1	KIF2A	0.839	1	384	S4(2.4)	0
chr1	118496483	118727846	231	1p12	SPAG17	0	0	0	S2(4.3)	0
chr9	136627015	136857726	231	9q34.2	VAV2	0.436	0.995	245	S2(4.3)	0
chr9	21802634	22032985	230	9p21.3	RP11-145E5.5	0.89	0.805	147	S1(5.2)	1	1	1	4		6
chr11	7260008	7490273	230	11p15.4	SYT9	0	0	0	S3(2.7)	0
chr16	27561453	27791690	230	16p12.1	KIAA0556	0.303	1	233	S2(3.8)	0
chr5	12574968	12804475	230	5p15.2	CT49	0.001	0	0	G2(1.4)	0
chr2	88055473	88285309	230	2p11.2	RGPD2	0	0	0	S2(3.8)	0
chr2	133174146	133404132	230	2q21.2	GPR39	0.093	0.998	244	S3(3.3)	0
chr5	153570289	153800544	230	5q33.2	GALNT10	2.943	1	256	S2(4.2)	0
chr2	39663777	39892483	229	2p22.1	AC007246.3	0.097	0.816	187	S1(5.4)	0.051		1			1
chr2	56179292	56408787	229	2p16.1	RP11-481J13.1	0.002	0	0	S2(4)	0
chr11	109225811	109454633	229	11q22.3	RP11-708B6.2	0.003	0.048	11	S3(2.5)	0
chr3	69788585	70017488	229	3p13-14	MITF	0.014	0.406	93	S2(3.9)	0
chr11	112263840	112492452	229	11q23.1	RP11-65M17.3	0	0	0	S3(3.4)	0
chr4	129786075	130014764	229	4q28.2	SCLT1	0.51	1	230	S3(3)	0
chr18	4775052	5004536	229	18p11.31	RP11-172F10.1	0	0	0	G2(1.4)	0
chr6	147830062	148058683	229	6q24.3	SAMD5	0.001	0	0	S3(3.2)	0
chr11	46958239	47185936	228	11p11.2	C11orf49	0.366	0.998	228	G1(5.6)	0
chr3	150570270	150798513	228	3q25.1	CLRN1-AS1	0	0	0	S3(3.4)	0
chrX	18443702	18671749	228	Xp22.13	CDKL5	0.181	0.973	222	S4(2.4)	0
chr5	110847923	111075423	228	5q22.1	STARD4-AS1	0.01	0	0	S2(4.2)	0
chr1	155305058	155532598	228	1q22	ASH1L	1.361	1	239	G1(5.6)	0
chr18	20378223	20606451	228	18q11.2	RBBP8	0.217	0.412	111	S1(4.8)	0
chr7	96110937	96339203	228	7q21.3	SHFM1	0.284	0.52	120	S4(1.8)	1				1	1
chr1	53971909	54199877	228	1p32.3	GLIS1	0.423	1	234	S1(5.2)	0
chr10	94590934	94819250	228	10q23.33	EXOC6	0.073	0.923	213	S1(5)	0
chr2	175411868	175639555	228	2q31.1	AC018890.6	0.004	0.13	32	S1(5.1)	0
chr6	17759413	17987854	228	6p22.3	KIF13A	2.137	1	242	S1(5.1)	0
chr1	180244514	180472089	228	1q25.2-3	ACBD6	1.219	1	247	S1(5)	0
chr8	84824947	85052518	228	8q21.2	RP11-120I21.2	0.001	0	0	G2(1.3)	0
chr4	129213905	129440549	227	4q28.2	RP11-420A23.1	0.122	1	296	S1(5.1)	0
chr2	210636716	210864024	227	2q34	UNC80	0	0	0	S4(2)	0
chr12	85430091	85657002	227	12q21.31	LRRIQ1	0.001	0	0	S4(1.7)	0
chr10	16632609	16859527	227	10p13	RSU1	1.704	1	254	S2(4.4)	0
chr11	14665268	14892350	227	11p15.2	PDE3B	0.002	0.013	3	S2(4.2)	0
chr4	46250443	46477247	227	4p12	GABRA2	0	0	0	S4(1.5)	0
chr6	42192668	42419789	227	6p21.1	TRERF1	0.903	0.999	234	S1(5.3)	0
chr5	23951456	24178372	227	5p14.2	C5orf17	0.001	0	0	G2(1.3)	0
chr17	34581085	34808061	227	17q12	TBC1D3H	0	0	0	S3(3.4)	0
chr1	97561478	97788511	227	1p21.3	DPYD-AS1	0.001	0	0	S2(3.9)	0
chr2	199211552	199437305	226	2q33.1	PLCL1:2	0.001	0	0	S4(1.6)	0
chr15	45997275	46223267	226	15q21.1	RP11-718O11.1	0.003	0.147	152	S3(3.2)	0
chr14	55033814	55260033	226	14q22.2	SAMD4A	3.909	1	243	S1(5.2)	0.504		1			1
chr22	40806284	41032706	226	22q13.1-2	MKL1	1.681	1	260	S1(5.4)	0
chr2	98703578	98929762	226	2q11.2	VWA3B	0.001	0.013	3	S3(3.2)	0
chr18	25530929	25757410	226	18q12.1	CDH2	4.357	1	273	S3(2.9)	0
chr1	210111537	210337636	226	1q32.2	SYT14	0.203	1	281	S2(4.3)	0
chr5	147830594	148056798	226	5q32	HTR4	0	0	0	S2(3.5)	0
chr16	20944432	21170762	226	16p12.3	DNAH3	0	0	0	S2(4.3)	0
chr2	159313475	159539391	226	2q24.1	PKP4	1.489	1	234	S2(3.5)	0
chr1	92145901	92371892	226	1p22.1	TGFBR3	1.995	0.91	276	S1(5.2)	0
chr19	45582545	45808541	226	19q13.32	MARK4	0.238	0.752	73	G1(5.6)	0
chr8	117962511	118188953	226	8q24.11	SLC30A8	0	0	0	S3(3.4)	0
chr5	140165875	140391929	226	5q31.3	PCDHA1	0.007	0	0	S3(3.1)	0
chr17	906757	1132315	226	17p13.3	ABR	0.193	0.779	182	S1(5.3)	0
chr8	9413423	9639856	226	8p23.1	TNKS	1.645	1	241	S3(2.6)	0
chr7	134429002	134655479	226	7q33	CALD1	11.066	1	276	S1(5.4)	0
chr17	56833229	57058983	226	17q22	PPM1E	0.001	0.013	3	S3(3.4)	0
chr4	118954772	119179803	225	4q26	NDST3	0.001	0	0	S2(3.6)	0
chr15	63900816	64126141	225	15q22.31	HERC1	1.29	1	233	S1(5.2)	0
chr11	28129794	28355054	225	11p14.1	METTL15	1.065	1	244	S2(4.4)	0
chr2	73612885	73837920	225	2p13.1	ALMS1	0.576	1	289	S2(4.1)	0
chr7	19393156	19618229	225	7p21.1	AC007091.1	0.007	0	0	S3(3)	0
chr15	101840817	102065405	225	15q26.3	PCSK6	0.001	0	0	S2(4.3)	0
chr15	64752940	64978264	225	15q22.31	ZNF609	0.981	1	234	S1(5.3)	0
chr9	80037994	80263223	225	9q21.2	GNA14	0.006	0	0	S3(3.4)	0
chr1	44171494	44396831	225	1p34.1	ST3GAL3	0.709	1	228	G1(5.5)	0
chr11	17809594	18034709	225	11p15.1	SERGEF	0.176	0.999	225	S3(3.4)	0
chr12	132680923	132905935	225	12q24.33	GALNT9	0	0	0	S2(4.3)	0
chr7	115575201	115799950	225	7q31.2	TFEC	0.004	0	0	S1(4.8)	0
chr5	61699798	61924409	225	5q12.1	IPO11	0.756	1	384	S4(2.4)	0
chr3	97952494	98176742	224	3q11.2	RP11-325B23.2	0	0	0	S3(2.7)	0
chrX	27193036	27417114	224	Xp21.3	RP11-268G12.1	0	0	0	S4(1.5)	0
chr3	176361728	176585626	224	3q26.32	RP11-644C3.1	0.003	0	0	S3(2.5)	0
chr1	230193535	230417870	224	1q42.13	GALNT2	1.299	0.956	225	S3(2.8)	0
chr2	172640879	172864766	224	2q31.1	SLC25A12	0.301	0.829	153	S1(5.2)	0
chr6	131160486	131384462	224	6q23.1-2	EPB41L2	1.353	1	274	S1(4.9)	0
chr2	120517206	120741394	224	2q14.2	PTPN4	0.57	1	254	S2(4)	0
chr7	156461645	156685924	224	7q36.3	LMBR1	0.619	1	236	S3(3.1)	0
chr8	75512009	75735548	224	8q21.11	RP11-758M4.1	0.001	0	0	S4(2.1)	0
chr1	213224588	213448116	224	1q32.3	RPS6KC1	1.336	1	286	S3(3.2)	0
chr4	80822302	81046608	224	4q21.21	ANTXR2	1.943	0.768	225	S1(5.1)	0
chr22	48027422	48251349	224	22q13.31	RP11-191L9.4	0	0	0	S4(2.1)	0.77				1	1
chr10	28064114	28287977	224	10p12.1	ARMC4	0.068	0.913	205	S2(3.9)	0
chr12	45609769	45834187	224	12q12	ANO6	1.464	1	234	S3(3.3)	0
chr5	119799972	120023027	223	5q23.1	PRR16	3.509	1	317	S2(4)	0
chr1	235824340	236046940	223	1q42.3	LYST	0.969	1	229	S1(5.2)	0
chr5	142985192	143208337	223	5q31.3	CTB-57H20.1	0	0	0	S1(5)	0
chr2	45615818	45839304	223	2p21	SRBD1	0.653	1	268	S1(4.7)	0
chrX	50334646	50557302	223	Xp11.22	SHROOM4	0	0	0	S4(1.7)	0
chr12	51984049	52206648	223	12q13.13	SCN8A	2.164	0.998	227	S1(5.1)	0
chr12	118587605	118810750	223	12q24.23	TAOK3	1.222	1	237	S2(3.6)	0
chr4	152023902	152246784	223	4q31.3	SH3D19	0.8	1	238	S2(3.7)	0
chr16	89334037	89556969	223	16q24.3	ANKRD11	1.942	1	223	G1(5.5)	0
chr3	151961616	152183569	222	3q25.1-2	MBNL1	6.798	0.937	343	S1(4.9)	0
chr5	79950466	80172279	222	5q14.1	MSH3	0.761	1	278	S2(4)	0
chr2	161128661	161350305	222	2q24.2	RBMS1	6.564	1	222	S1(4.7)	0
chr1	208195586	208417665	222	1q32.2	PLXNA2	0.412	1	224	S2(4)	0
chr17	8924858	9147317	222	17p13.1	NTN1	0.001	0	0	S3(2.6)	0
chr15	52599479	52821247	222	15q21.2	MYO5A	0.986	1	248	S1(4.9)	0
chr1	64936427	65158741	222	1p31.3	CACHD1	0.218	1	234	S2(3.5)	0
chr3	33537736	33759848	222	3p22.3	CLASP2	0.694	0.998	277	S1(4.7)	0
chr18	59000814	59223006	222	18q21.33	CDH20	0.001	0	0	S2(3.5)	0
chr12	112597991	112819896	222	12q24.13	HECTD4	0.77	1	246	G1(5.5)	0
chr3	159945240	160167617	222	3q25.33	RP11-432B6.3	0.461	0.981	254	S1(5.1)	0
chr1	87380330	87602334	222	1p22.3	HS2ST1	0.319	0.955	212	S2(3.9)	0
chr8	55561552	55782463	221	8q12.1	RP11-56A10.1	0	0	0	S4(1.5)	0
chr1	65886247	66107242	221	1p31.3	LEPR	0.212	1	221	S2(3.5)	0
chr4	184020445	184241930	221	4q35.1	WWC2	3.07	1	260	S1(5.1)	0
chr8	95907994	96128683	221	8q22.1	NDUFAF6	0.134	0.949	210	S1(4.8)	0
chr12	42632248	42853517	221	12q12	PPHLN1	0.801	1	239	S3(3.4)	0
chr7	19958603	20180076	221	7p21.1	AC005062.2	0.002	0	0	S3(2.8)	0
chr7	115927433	116148595	221	7q31.2	CAV2	0.21	0.15	25	G1(5.6)	0
chr6	130465459	130686570	221	6q23.1	SAMD3	1.015	1	246	S2(4.4)	0
chr3	156543269	156763918	221	3q25.31	LEKR1	0.031	0.636	140	S1(5.1)	0
chr7	86273229	86494200	221	7q21.11-12	GRM3	0	0	0	G2(1.4)	0
chr4	87515467	87736324	221	4q21.3	PTPN13	0.635	1	233	S1(4.7)	0
chr6	83920107	84140797	221	6q14.2	ME1	0.393	1	238	S3(3.4)	0
chr7	34697850	34917944	220	7p14.3	NPSR1	0.001	0	0	S4(2.2)	0
chr9	128509623	128729656	220	9q33.3	PBX3	2.615	1	232	S1(4.5)	0
chr2	179694483	179914813	220	2q31.2	CCDC141	0.001	0	0	S4(2.4)	0
chrX	117031775	117251303	220	Xq24	KLHL13	0	0	0	S4(2.4)	0
chr9	134735493	134955295	220	9q34.13	MED27	1.012	1	222	S1(4.6)	0
chr14	87819413	88039366	220	14q31.3	RP11-594C13.1	0	0	0	S4(1.6)	0
chr1	146032647	146253110	220	1q21.1	WI2-3658N16.1	0	0.023	5	NULL	0
chr17	75276650	75496678	220	17q25.2-3	2014-09-09	1.478	1	244	S1(5.3)	0
chr11	21305282	21525745	220	11p15.1	CTD-2302A16.2	0.001	0	0	G2(1.3)	0
chr2	166326156	166545917	220	2q24.3	CSRNP3	0.001	0	0	S4(2.4)	0
chr16	81772701	81991899	219	16q23.3	PLCG2	0.002	0	0	S2(4.2)	0
chr2	199417918	199637080	219	2q33.1	AC019330.1	0.001	0	0	S4(1.6)	0
chrX	138808504	139027435	219	Xq27.1	ATP11C	1.057	0.941	257	S4(2.2)	0
chr4	170314425	170533780	219	4q33	NEK1	0.555	1	279	S1(5.1)	0
chr3	149235021	149454501	219	3q25.1	WWTR1	1.827	1	272	G1(5.6)	0
chr9	97861335	98079991	219	9q22.32	FANCC	0.299	1	222	S2(4.2)	0
chr5	76506273	76725632	219	5q13.3	PDE8B	0.006	0.023	5	S2(4)	0
chrX	22050558	22269427	219	Xp22.11	PHEX	0.086	1	241	S2(3.7)	0
chr6	135818488	136037193	219	6q23.3	LINC00271	0.02	0.311	68	S2(4.2)	0
chr9	2422701	2641395	219	9p24.2	RP11-125B21.2	0.061	1	223	S3(3)	0.115		1			1
chr11	103546721	103765999	219	11q22.3	RP11-563P16.1	0.025	0.578	254	S2(4.3)	0
chr10	132890653	133109984	219	10q26.3	TCERG1L	0	0	0	S4(1.5)	0
chr1	112313283	112531777	218	1p13.2	KCND3	0.001	0	0	S2(4.3)	0
chrX	62563105	62780951	218	Xq11.1	RP11-357C3.3	0.357	1	375	S4(2.1)	0
chr2	86730553	86948245	218	2p11.2	CHMP3	0.419	0.551	149	S3(3)	0
chr9	124329335	124547809	218	9q33.2	DAB2IP	0.092	1	244	S1(5.2)	0
chr9	17579079	17797127	218	9p22.2	SH3GL2	0.001	0	0	S3(3)	0
chr16	18027045	18245452	218	16p12.3	CTA-481E9.4	0	0	0	S4(2.4)	0
chr11	8714897	8932498	218	11p15.4	ST5	0.377	1	245	G1(5.6)	0
chr21	19641432	19858197	217	21q21.1	TMPRSS15	0.001	0	0	G2(1.4)	0
chr21	26212863	26430059	217	21q21.2	AP000235.2	0.001	0.037	8	S4(2)	0
chr13	42614175	42830714	217	13q14.11	DGKH	1.049	0.998	218	S1(4.9)	0
chr12	94071150	94288616	217	12q22	CRADD	0.209	1	268	S1(5)	0
chr5	140174443	140391929	217	5q31.3	PCDHA2	0.008	0	0	S3(3.1)	0
chr3	6190170	6407572	217	3p26.1	AC026167.1	0.001	0	0	G2(1.3)	0
chr10	117816443	118032979	217	10q25.3	GFRA1	0.443	1	234	S4(2.4)	0
chr10	114710008	114927437	217	10q25.2-3	TCF7L2	2.502	1	257	S2(4.3)	0
chr20	40030740	40247133	216	20q12	CHD6	1.096	1	221	S1(5.1)	0
chr6	97372604	97588630	216	6q16.1	KLHL32	0.001	0	0	S4(2.1)	0
chrX	33744624	33960397	216	Xp21.1	RP11-305F18.1	0	0	0	S4(1.5)	0
chr4	95373036	95589377	216	4q22.3	PDLIM5	7.493	1	228	S1(4.9)	0.897			1		1
chr9	121915735	122131745	216	9q33.1	BRINP1	0.004	0	0	S4(1.5)	0
chr5	68790039	69006341	216	5q13.2	GUSBP3	0	0.023	5	S2(4)	0
chr18	48872618	49088939	216	18q21.2	RP11-267C16.1	0	0	0	S4(1.7)	0
chr9	39072763	39288312	216	9p13.1	CNTNAP3	0	0	0	S4(1.6)	0
chrX	131351174	131566890	216	Xq26.2	RAP2C-AS1	0.153	0.998	265	S4(2)	0
chr6	146920100	147136598	216	6q24.3	ADGB	0.001	0.02	60	S3(3.4)	0
chr12	58959742	59175529	216	12q14.1	RP11-767I20.1	0.001	0	0	S2(4.1)	0
chr2	27994583	28210954	216	2p23.2	MRPL33	0.352	1	574	G1(5.5)	0
chr9	113127530	113342160	215	9q31.3	SVEP1	0.544	1	234	S1(5.3)	0
chr4	187207247	187422151	215	4q35.2	F11-AS1	0.001	0	0	S4(2.4)	0
chr2	86732790	86948245	215	2p11.2	RNF103-CHMP3	0.407	0.546	149	S3(3)	0
chr7	65670185	65885530	215	7q11.21	TPST1	1.485	1	269	G1(5.5)	0
chr4	153242409	153457253	215	4q31.3	FBXW7	1.281	1	215	S3(3.4)	0
chr1	66999065	67213982	215	1p31.3	SGIP1	1.453	1	220	S1(5.1)	0
chr1	41492871	41707826	215	1p34.2	SCMH1	0.832	0.998	219	S1(4.7)	0
chr5	60628099	60841997	214	5q12.1	ZSWIM6	2.297	0.998	229	S1(4.7)	0
chr8	88554213	88767946	214	8q21.3	AF121898.3	0.001	0	0	S4(1.8)	0
chr17	43699266	43913194	214	17q21.31	CRHR1	0.022	0.179	40	S2(4.4)	0
chr21	45917774	46131495	214	21q22.3	TSPEAR	0.002	0.019	4	S2(4.1)	0
chr6	135604669	135818914	214	6q23.3	AHI1	0.547	1	229	S2(4.3)	0
chr8	62413115	62627155	214	8q12.3	ASPH	5.538	1	249	S1(4.9)	0
chr3	94657015	94871353	214	3q11.2	LINC00879	0.001	0.033	7	G2(1.4)	0
chr22	31089768	31303811	214	22q12.2	OSBP2	0.111	1	228	S1(4.9)	0
chr22	26565439	26779562	214	22q12.1	SEZ6L	0	0	0	S3(3.4)	0
chr3	105374304	105588396	214	3q13.11	CBLB	13.558	1	327	S2(4)	0
chr4	100010007	100222513	213	4q23	RP11-696N14.1	0.076	1	225	S2(3.5)	0
chr2	54683421	54896812	213	2p16.2	SPTBN1	3.53	0.995	231	S1(4.9)	0
chr4	106603783	106817143	213	4q24	INTS12	0.105	0.125	30	S4(2.4)	0
chr8	5901874	6115058	213	8p23.2	RP11-124B13.1	0	0	0	S3(2.5)	0
chr7	22459062	22672544	213	7p15.3	STEAP1B	0.091	0.372	142	S1(5.1)	0
chr12	3490514	3703139	213	12p13.32	PRMT8	0	0	0	S3(3.4)	0
chr6	111981534	112194655	213	6q21	FYN	1.805	0.999	267	S1(5.2)	0
chr3	238278	451090	213	3p26.3	CHL1	0	0	0	G2(1.3)	0
chr17	411907	624957	213	17p13.3	VPS53	1.366	1	329	S1(5.1)	0
chr4	105828513	106041157	213	4q24	RP11-556I14.1	0	0	0	S3(2.5)	0
chr2	69688531	69901481	213	2p13.3	AAK1	1.688	0.859	207	G1(5.6)	0
chr15	37181405	37393504	212	15q14	MEIS2	4.611	1	214	S2(4.4)	0
chr3	42055293	42267381	212	3p22.1	TRAK1	2.907	1	225	S2(3.9)	0
chr7	36552455	36764154	212	7p14.2	AOAH	0	0	0	S3(3.4)	0
chr10	31109135	31320866	212	10p11.22-23	ZNF438	0.33	0.96	204	S1(5.3)	0
chr1	52042850	52254889	212	1p32.3	OSBPL9	0.975	0.813	177	G1(5.6)	0
chr18	12446510	12658133	212	18p11.21	SPIRE1	1.675	1	234	S1(5.1)	0
chr2	203879601	204091101	212	2q33.2	NBEAL1	1.676	1	224	S1(4.8)	0
chr12	93397190	93609455	212	12q22	RP11-511B23.2	0.019	0.608	162	S1(5.1)	0
chr15	49447852	49660066	212	15q21.1-2	GALK2	0.866	1	240	S1(4.9)	0
chr5	140180782	140391929	211	5q31.3	PCDHA3	0.008	0	0	S3(3.1)	0
chr5	17065706	17276943	211	5p15.1	BASP1	0.748	0.565	137	G1(5.7)	0
chr3	171318194	171528740	211	3q26.31	PLD1	0.053	1	226	S1(5.1)	0
chr15	28356185	28567298	211	15q13.1	HERC2	0.756	1	219	S4(2.3)	0
chr1	163080910	163291577	211	1q23.3	RGS5	0.085	0.926	196	S1(4.8)	0
chr21	23582257	23793139	211	21q21.1	AP000705.7	0.001	0.019	4	S4(1.5)	0
chr8	58506724	58717588	211	8q12.1	RP11-388G22.1	0.001	0	0	S4(2.1)	0
chr5	130759613	130970929	211	5q31.1	RAPGEF6	0.929	1	435	S2(3.8)	0
chr4	157681605	157892546	211	4q32.1	PDGFC	5.53	1	251	S1(4.6)	0
chrX	96686284	96897588	211	Xq21.33	DIAPH2-AS1	0.001	0	0	S3(2.8)	0
chr8	65500319	65711318	211	8q12.3	CYP7B1	0.001	0	0	G2(1.3)	0
chr10	103605355	103815950	211	10q24.32	C10orf76	0.903	1	212	G1(5.6)	0
chr10	31607423	31818742	211	10p11.22	ZEB1	3.382	0.995	220	S1(4.9)	0
chr6	128029216	128239776	211	6q22.33	THEMIS	0.001	0	0	S2(3.9)	0
chr5	118373466	118584833	211	5q23.1	DMXL1	0.811	0.844	198	S2(3.8)	0
chr15	81952822	82163466	211	15q25.2	RP11-499F3.2	0	0	0	S3(3.1)	0
chr9	90112142	90323548	211	9q21.33	DAPK1	0.02	0.762	178	S3(3.3)	0
chr10	49654076	49864310	210	10q11.22	ARHGAP22	1.581	1	243	S2(3.9)	0
chr3	105085752	105295744	210	3q13.11	ALCAM	4.534	1	236	S2(4)	0
chr2	131594488	131804836	210	2q21.1	ARHGEF4	0.005	0.063	15	S3(3)	0
chr8	58907067	59116838	210	8q12.1	FAM110B	0.62	1	225	S3(3)	0
chr4	123073487	123283913	210	4q27	KIAA1109	1.139	1	215	S2(4)	0
chr2	67313577	67523207	210	2p14	AC023115.2	0.003	0.062	13	S1(4.7)	0
chr12	65672422	65882024	210	12q14.3	MSRB3	2.412	1	233	G1(5.5)	0
chr12	3186520	3395730	209	12p13.32-33	TSPAN9	0.14	1	215	S1(5.1)	0
chr12	31535156	31744031	209	12p11.21	DENND5B	0.606	1	222	S2(4)	0
chrX	34224841	34433654	209	Xp21.1	RP11-545D19.1	0.001	0	0	S4(1.5)	0
chr15	34671268	34880704	209	15q14	GOLGA8A	0.021	0.694	71	S1(4.8)	0
chr5	78073031	78281910	209	5q14.1	ARSB	0.984	1	216	S1(4.9)	0
chr7	87133174	87342611	209	7q21.12	ABCB1	0.002	0	0	S4(2.2)	0
chr10	21823093	22032559	209	10p12.31	MLLT10	2.928	1	233	S2(4.4)	0
chr7	38762562	38971994	209	7p14.1	VPS41	0.519	0.893	223	S4(2.4)	0
chr4	23562545	23770275	208	4p15.2	RP11-380P13.1	0	0	0	S4(2.1)	0
chr15	62144587	62352672	208	15q22.2	VPS13C	1.007	1	226	S3(3.1)	0
chr14	71374121	71582099	208	14q24.2	PCNX	2.652	0.998	228	S1(4.9)	0
chr5	60240955	60448853	208	5q12.1	NDUFAF2	0.796	1	217	S2(4.1)	0
chr4	40425271	40632892	208	4p14	RBM47	0.027	0.998	208	S2(4.1)	0
chr12	76745576	76953589	208	12q21.2	OSBPL8	1.917	1	212	S1(5)	0
chr6	136663874	136871957	208	6q23.3	MAP7	0.028	1	209	S2(4.1)	0
chr14	27067617	27275673	208	14q12	NOVA1-AS1	0.001	0	0	G2(1.3)	0
chr15	77905368	78113242	208	15q24.3	LINGO1	0	0	0	S1(4.5)	0
chr18	41903400	42111662	208	18q12.3	CTC-782O7.1	0.001	0	0	S4(1.8)	0
chr6	485132	693117	208	6p25.3	EXOC2	0.767	1	228	S3(3.2)	0
chr5	63461670	63668696	207	5q12.3	RNF180	0.094	1	232	S4(2.3)	0
chr3	72084450	72291716	207	3p13	LINC00877	0	0	0	S3(3.4)	0
chr2	215796265	216003151	207	2q35	ABCA12	0.001	0	0	S3(3)	0
chr3	149478891	149686172	207	3q25.1	ANKUB1	0.357	0.717	202	S1(5.2)	0
chrX	16964813	17171395	207	Xp22.13-2	REPS2	0.003	0	0	S3(3.4)	0
chr8	121925304	122131994	207	8q24.12	RP11-369K17.1	0.001	0	0	S1(4.5)	0
chr1	167190065	167396582	207	1q24.1-2	POU2F1	0.661	0.998	215	S3(2.7)	0
chr4	105412121	105618749	207	4q24	AC004053.1	0	0	0	G2(1.4)	0
chr10	76585339	76792380	207	10q22.2	KAT6B	1.154	0.994	211	S1(5.2)	0
chr7	124812271	125019375	207	7q31.33	RP11-3B12.2	0	0	0	G2(1.3)	0
chr5	38258510	38465123	207	5p13.1-2	EGFLAM	0	0	0	S2(4.3)	0
chr13	110958158	111165374	207	13q34	COL4A2	0.898	0.994	213	S1(5)	0
chr8	1449531	1656642	207	8p23.3	DLGAP2	0	0	0	S3(3.1)	0
chr7	76751750	76958850	207	7q11.23	CCDC146	0.09	1	389	S1(5.2)	0
chr11	34172534	34379555	207	11p13	ABTB2	0.501	1	219	S1(4.8)	0
chr11	44748014	44953972	206	11p11.2	TSPAN18	0.007	0	0	S2(4)	0
chr2	175664090	175870097	206	2q31.1	CHN1	0.481	1	217	S1(5.3)	0
chr12	119772516	119978852	206	12q24.23	CCDC60	0	0	0	S4(2.4)	0
chr4	87856153	88062206	206	4q21-22	AFF1	1.112	1	232	S1(5)	0
chr3	156893011	157099054	206	3q25.31-32	RP11-550I24.2	0.092	1	262	G1(5.5)	0
chr3	162744183	162949937	206	3q26.1	RP11-10O22.1	0	0	0	G2(1.2)	0
chr3	185000728	185206885	206	3q27.2	MAP3K13	0.247	1	208	S2(4.1)	0
chr16	80631802	80838226	206	16q23.2	CDYL2	0.438	0.996	229	S3(3.3)	0
chr6	110931180	111137161	206	6q21	CDK19	0.385	0.997	245	S1(4.8)	0
chr7	75162620	75368280	206	7q11.23	HIP1	0.766	1	211	G1(5.6)	0
chr7	68689682	68895909	206	7q11.22	RP11-3P22.2	0.011	0.315	65	G2(1.4)	0
chr19	5993174	6199583	206	19p13.3	RFX2	0.207	0.661	132	S1(4.8)	0
chr10	15555947	15762124	206	10p13	ITGA8	0.004	0	0	S3(3.4)	0
chr13	35009586	35214822	205	13q13.2	LINC00457	0	0	0	S4(2.3)	0
chr5	140186658	140391929	205	5q31.3	PCDHA4	0.008	0	0	S3(3)	0
chr7	87256863	87461611	205	7q21.12	RUNDC3B	0.004	0	0	S4(2.1)	0
chr9	27325206	27529779	205	9p21.2	MOB3B	0.003	0	0	S3(2.5)	0
chr7	140419126	140624564	205	7q34	BRAF	1.208	1	229	S2(4.1)	0
chr2	179059207	179264160	205	2q31.2	OSBPL6	0.344	0.999	206	S2(3.8)	0
chr3	141663276	141868386	205	3q23	TFDP2	0.404	1	231	S1(4.6)	0
chr3	110788917	110994410	205	3q13.13	PVRL3	2.042	0.992	214	S2(3.9)	0
chr13	113548691	113754053	205	13q34	MCF2L	0.002	0	0	S2(4.2)	0
chrY	21034386	21239302	205	Yq11.222	TTTY14	0	0	0	NULL	0
chr4	37245841	37451087	205	4p14	KIAA1239	0	0	0	S4(1.7)	0
chr5	131142682	131347936	205	5q31.1	ACSL6	0.001	0	0	S1(4.5)	0
chr7	128864863	129070052	205	7q32.1	AHCYL2	0.306	0.997	209	S1(5)	0
chr5	41307055	41510730	204	5p13.1	PLCXD3	0.01	0	0	S3(3)	0
chr6	75239963	75443995	204	6q13	RP11-554D15.3	0.005	0	0	S2(4.1)	0
chr7	90940682	91144724	204	7q21.13-2	RP11-115N4.1	0.001	0	0	S2(3.8)	0
chr1	214522038	214725792	204	1q41	PTPN14	4.8	0.999	234	G1(5.5)	0
chr8	25699245	25902913	204	8p21.2	EBF2	1.084	1	206	S3(3.3)	0
chr1	201592410	201796102	204	1q32.1	NAV1	5.634	1	206	G1(5.7)	0
chr1	52608045	52812358	204	1p32.3	ZFYVE9	0.685	0.998	226	S1(5.3)	0
chr14	100204029	100408397	204	14q32.2	EML1	0.415	1	227	S1(5.4)	0
chr1	23037331	23241818	204	1p36.12	EPHB2	0.024	0.989	204	S1(5.2)	0
chr1	177362422	177566844	204	1q25.2	RP1-35C21.2	0.001	0	0	S4(2.1)	0
chr1	217600333	217804424	204	1q41	GPATCH2	1.109	1	211	S4(2.2)	0
chr20	47240789	47444420	204	20q13.13	PREX1	0.046	1	207	S2(4.4)	0
chr11	77926342	78129394	203	11q14.1	GAB2	0.453	1	211	S1(4.9)	0
chr9	70943223	71145977	203	9q21.11	PGM5	0	0	0	S3(2.8)	0
chr9	137533619	137736686	203	9q34.3	COL5A1	2.124	1	223	S1(5.1)	0
chr7	119344609	119547429	203	7q31.31	RP11-328J2.1	0.002	0	0	G2(1.3)	0
chr10	12938626	13141652	203	10p13	CCDC3	0.007	0.193	41	S3(3.4)	0
chr15	94448633	94651167	203	15q26.2	CTD-2643K12.3	0.005	0.044	9	S3(2.7)	0
chr5	66995256	67198428	203	5q13.1	RP11-83M16.6	0	0	0	S3(2.8)	0
chr5	125412492	125615493	203	5q23.2	RP11-114J13.1	0.003	0	0	S2(4.3)	0
chr2	104490767	104694236	203	2q12.1	RP11-76I14.1	0.001	0	0	G2(1.3)	0
chrX	14547419	14749934	203	Xp22.2	GLRA2	0.002	0	0	S3(3.4)	0
chr2	218664511	218867718	203	2q35	TNS1	1.705	1	248	S1(5.1)	0
chr18	22305744	22509040	203	18q11.2	RP11-449D8.5	0.068	0.8	188	S2(3.8)	0
chrX	8496914	8700227	203	Xp22.31	KAL1	0	0	0	S4(2.4)	0
chr7	50657759	50861159	203	7p12.1	GRB10	1.247	1	209	S3(3)	0
chr10	103113819	103317078	203	10q24.32	BTRC	0.929	1	217	S1(4.5)	0
chr4	59646790	59849870	203	4q13.1	RP11-506N2.1	0.001	0	0	G2(1.3)	0
chr3	194789007	194991896	203	3q29	XXYLT1	0.404	1	208	S2(4.1)	0
chr18	67671028	67873181	202	18q22.2	RTTN	0.953	1	327	S2(4.4)	0
chr6	154475630	154677926	202	6q25.2	IPCEF1	0.017	0.561	113	S2(3.7)	0
chr11	8413417	8615836	202	11p15.4	STK33	0.003	0	0	S1(4.8)	0
chr2	56411257	56613308	202	2p16.1	CCDC85A	1.314	0.999	230	S3(2.8)	0
chr6	76001574	76203454	202	6q14.1	FILIP1	0.003	0	0	S1(5.2)	0
chr3	57327726	57530071	202	3p14.3	DNAH12	0.01	0.176	67	S2(4)	0
chr6	34857041	35059179	202	6p21.31	ANKS1A	0.39	1	224	S1(5.3)	0
chr2	200134222	200335989	202	2q33.1	SATB2	1.642	0.963	255	S3(2.6)	0
chr20	10415950	10617477	202	20p12.2	SLX4IP	0.344	1	209	S2(4)	0
chr7	95749531	95951459	202	7q21.3	SLC25A13	0.474	1	205	S4(2.2)	0
chr15	56536206	56738195	202	15q21.3	TEX9	0.049	1	217	S2(3.7)	0
chr11	30406039	30608419	202	11p14.1	MPPED2	0.037	0.943	192	S4(1.5)	0
chr18	24034873	24237365	202	18q11.2	KCTD1	0.122	0.462	98	S3(2.5)	0
chr9	102861537	103063282	202	9q31.1	INVS	0.663	1	302	S2(4.1)	0
chr17	12692855	12894960	202	17p12	ARHGAP44	0.012	0.2	41	S2(3.7)	0
chrX	57313138	57515629	202	Xp11.21	FAAH2	0.013	0.431	253	S4(1.7)	0
chr2	228844665	229046361	202	2q36.3	SPHKAP	0	0.015	3	S3(2.5)	0
chr15	91643179	91844539	201	15q26.1	SV2B	0	0	0	S2(3.9)	0
chr10	90973325	91174314	201	10q23.31	LIPA	0.208	0.796	146	G1(5.5)	0
chr9	36833271	37034103	201	9p13.2	PAX5	0	0	0	S2(4.2)	0
chr2	211342405	211543831	201	2q34	CPS1	0.029	0.707	152	S4(1.5)	0
chr11	5326205	5526882	201	11p15.4	AC104389.28	0.002	0	0	S3(3.4)	0
chr9	127704886	127905785	201	9q33.3	SCAI	0.388	1	282	G1(5.6)	0
chr6	90142888	90343553	201	6q15	ANKRD6	0.006	0	0	S3(2.8)	0
chr3	68780916	68981761	201	3p14.1	FAM19A4	0	0	0	S3(2.5)	0
chr13	47127302	47327175	200	13q14.13-2	LRCH1	0.924	0.999	203	S2(3.7)	0
chr15	96670597	96870590	200	15q26.2	NR2F2-AS1	0.127	1	226	S2(3.7)	0
chr16	65266958	65466723	200	16q21	RP11-256I9.3	0	0	0	S3(3.4)	0
chr12	97379433	97579387	200	12q23.1	RP11-541G9.1	0.001	0.005	80	S3(2.8)	0
chr7	29034846	29235067	200	7p14.3	CPVL	0	0	0	S4(2.2)	0
chr3	16355080	16555533	200	3p24-25	RFTN1	1.671	1	236	S1(5.2)	0
chr14	92047039	92247051	200	14q32.12	CATSPERB	0.004	0.043	95	S3(3.3)	0
chr4	111286888	111486441	200	4q25	ENPEP	0.001	0	0	S3(2.5)	0
chr6	96463859	96663488	200	6q16.1	FUT9	0	0	0	G2(1.3)	0
chr21	19933582	20132321	199	21q21.1	AL109763.2	0.001	0	0	G2(1.4)	0
chr6	158733691	158932860	199	6q25.3	TULP4	0.769	1	218	S1(5.2)	0
chr14	39218544	39417477	199	14q21.1	LINC00639	0.014	0.397	105	S2(3.5)	0
chr11	10329859	10529126	199	11p15.4	AMPD3	0.384	1	247	G1(5.6)	0
chr8	136469699	136668965	199	8q24.23	KHDRBS3	0.61	1	208	S4(2.2)	0
chr10	54316461	54515169	199	10q21.1	RP11-556E13.1	0.002	0	0	S2(4.4)	0
chr16	59889256	60087875	199	16q21	RP11-430C1.1	0.002	0	0	S4(1.6)	0
chr13	39261265	39460074	199	13q13.3	FREM2	0.001	0	0	S4(2)	0
chr7	141607612	141806547	199	7q34	MGAM	0.001	0	0	S4(2.3)	0
chr6	11183530	11382581	199	6p24.2	NEDD9	0.401	0.251	58	S2(4.1)	1			1		1
chr7	113516831	113715975	199	7q31.1	PPP1R3A	0.001	0.025	5	S4(2.1)	0
chr2	9346893	9545812	199	2p25.1	ASAP2	4.321	1	249	G1(5.5)	0
chr1	152140600	152339163	199	1q21.3	FLG-AS1	0.166	0.895	189	S3(3.3)	0
chr6	109814058	110012420	198	6q21	AK9	0.016	0.429	85	S3(3.3)	0
chr11	46417963	46615675	198	11p11.2	AMBRA1	1.163	1	202	G1(5.6)	0
chrX	133699867	133898352	198	Xq26.3	PLAC1	0.003	0.045	42	S1(5.4)	0
chr2	192711264	192908909	198	2q32.3	AC098617.1	0.005	0	0	S2(4.4)	0
chr1	77333125	77531396	198	1p31.1	ST6GALNAC5	0.225	1	201	S2(3.6)	0
chr2	102313311	102511149	198	2q11.2	MAP4K4	6.157	1	241	S1(4.7)	0
chr18	976589	1174824	198	18p11.32	RP11-78F17.1	0	0	0	S3(2.9)	0
chr1	161736083	161933860	198	1q23.3	ATF6	0.918	1	204	S1(4.7)	0
chr4	104177315	104374815	198	4q24	RP11-328K4.1	0	0	0	S4(2.4)	0
chr11	73111531	73309234	198	11q13.4	FAM168A	1.108	0.996	201	G1(5.5)	0
chr12	43747668	43945724	198	12q12	ADAMTS20	0	0	0	S2(4.2)	0
chr4	10488018	10686489	198	4p16.1	CLNK	0.001	0	0	S3(3.3)	0
chr10	7860466	8058590	198	10p14	TAF3	0.465	1	208	S3(3.3)	0
chr5	173472606	173670504	198	5q35.2	NSG2	0	0	0	S4(2.4)	0
chr2	208693026	208890284	197	2q33.3	PLEKHM3	0.437	1	204	S2(3.6)	0
chr22	17840836	18037850	197	22q11.1-21	CECR2	0	0	0	S2(4.2)	0
chr5	139226363	139422884	197	5q31.2	NRG2	0.008	0	0	S1(4.8)	0
chr2	176121977	176319368	197	2q31.1	AC096649.3	0	0	0	S3(2.9)	0
chr15	25295778	25492435	197	15q11.2	SNHG14:2	0.292	0.527	198	S4(2.2)	0
chr2	242823513	243020873	197	2q37.3	AC131097.3	0.039	0.618	122	S2(4)	0
chr5	35617945	35814713	197	5p13.2	SPEF2	0.045	0.821	106	S2(4.1)	0
chr16	14529557	14726585	197	16p13.12	PARN	0.772	1	215	S1(5)	0
chr1	235294948	235491534	197	1q42.3	ARID4B	1.628	1	199	S1(5.3)	0
chr3	47626761	47823596	197	3p21.31	SMARCC1	1.395	1	223	S1(5.2)	0
chr18	11688954	11885684	197	18p11.21	GNAL	0.039	0.051	10	S2(3.6)	0
chr2	30670091	30867091	197	2p23.1	LCLAT1	1.165	1	274	S2(4.2)	0
chr13	113344642	113541482	197	13q34	ATP11A	0.191	1	199	S2(3.9)	0
chr20	24449834	24647252	197	20p11.21	SYNDIG1	0.02	0.714	141	S3(2.6)	0
chr3	124801479	124998021	197	3q21.2	SLC12A8	1.139	1	320	G1(5.6)	1		1			1
chr15	71145577	71342414	197	15q23	LRRC49	0.143	1	225	G1(5.6)	0
chr18	60790578	60987361	197	18q21.33	BCL2	0.023	1	199	S2(3.5)	0
chr15	91951937	92148441	197	15q26.1	RP11-661P17.1	0	0	0	S3(2.5)	0
chr13	75858807	76056250	197	13q22.2	TBC1D4	0.462	1	232	S1(4.8)	0
chr19	20236185	20432114	196	19p12	CTC-260E6.6	0.036	0.398	78	S4(2.1)	0
chr11	41540444	41735998	196	11p12	RP11-124G5.3	0.002	0	0	G2(1.3)	0
chr17	53046087	53241646	196	17q22	STXBP4	0.209	1	202	S3(2.5)	0
chr7	11013498	11209250	196	7p21.3	PHF14	0.558	1	204	S4(1.8)	0
chr10	74451888	74647452	196	10q22.1	MCU	1.907	1	202	S1(5.2)	0
chr8	28924795	29120641	196	8p12	KIF13B	0.031	1	198	S1(4.7)	0
chr6	40359324	40555204	196	6p21.1-2	LRFN2	0	0	0	S4(2.2)	0
chr9	77112280	77308093	196	9q21.13	RORB	0.001	0	0	S4(1.8)	0
chr10	67330095	67526299	196	10q21.3	RP11-222A11.1	0.036	0.761	151	G2(1.4)	0
chr10	63661058	63856703	196	10q21.2	ARID5B	3.065	1	270	G1(5.5)	0
chr7	101006100	101202304	196	7q22.1	COL26A1	0.001	0	0	S1(4.7)	0
chr5	106150897	106346715	196	5q21.3	CTC-254B4.1	0	0	0	S4(1.6)	0
chr14	35591051	35786680	196	14q13.2	KIAA0391	0.769	1	203	S1(5.4)	0
chrX	44007127	44202918	196	Xp11.3	EFHC2	0.009	0.181	36	S4(2.3)	0
chr5	173763297	173959460	196	5q35.2	RP11-267A15.1	0	0	0	S4(2.3)	0
chr17	44107281	44302733	195	17q21.31	KANSL1	2.757	1	223	S1(4.9)	0
chr1	178694299	178889238	195	1q25.2	RALGPS2	2.526	0.999	222	S1(5.2)	0
chr7	143339347	143534026	195	7q35	RP11-61L23.2	0.002	0.067	13	S3(3.2)	0
chr17	43699273	43893909	195	17q21.31	RP11-105N13.4	0.024	0.196	40	S2(4.4)	0
chr2	36583068	36778278	195	2p22.2-3	CRIM1	15.995	0.998	227	S1(5.3)	0.572		3			3
chr14	86401053	86596117	195	14q31.3	CTD-2341M24.1	0.001	0	0	S4(2.2)	0
chr1	71318035	71513491	195	1p31.1	PTGER3	0.107	1	201	S4(2.3)	0
chr3	58810162	59004819	195	3p14.2	RP11-147N17.1	0.002	0	0	S3(3)	0
chr13	28874488	29069265	195	13q12.2-3	FLT1	0.008	0	0	S1(5)	0
chr5	76721794	76916436	195	5q13-14	WDR41	0.481	0.343	80	S2(4)	0
chr11	94278495	94473521	195	11q21	RP11-867G2.8	0.001	0	21	S1(4.5)	0
chr16	14165177	14360630	195	16p13.12	MKL2	0.356	0.998	216	S1(4.8)	0
chr9	108006902	108201452	195	9q31.1-2	SLC44A1	1.198	1	204	S1(4.9)	0
chr9	88161454	88356944	195	9q21.33	AGTPBP1	0.366	0.998	222	S4(2.3)	0
chr10	112404154	112599227	195	10q25.2	RBM20	0.003	0	0	S1(4.7)	0
chr2	136289024	136482840	194	2q21.3	R3HDM1	0.664	1	211	S2(4)	0
chr5	146967989	147162338	194	5q32	JAKMIP2	0	0	0	S2(4.3)	0
chr3	139108656	139302161	194	3q23	RP11-319G6.1	0.03	0.635	124	S3(2.9)	0
chr15	80696691	80890278	194	15q25.1	ARNT2	0.108	0.996	200	S1(5.2)	0
chr7	74112304	74306731	194	7q11.23	STAG3L2	0.004	0	0	G1(5.6)	0
chr6	71377478	71571718	194	6q13	SMAP1	0.808	1	199	S3(2.7)	0
chr1	102268129	102462586	194	1p21.1	OLFM3	0.001	0.031	3	S4(1.5)	0
chr1	204797778	204991950	194	1q32.1	NFASC	1.67	1	201	S1(4.5)	0
chr4	7967038	8160559	194	4p16.1	ABLIM2	0.002	0	0	G1(5.5)	0
chr6	143072603	143266338	194	6q24.2	HIVEP2	2.822	1	210	S2(4.2)	0
chr8	70378858	70573150	194	8q13.2-3	SULF1	11.188	1	220	S3(3.4)	0
chr8	123793632	123986750	193	8q24.13	ZHX2	0.221	1	197	S2(4.4)	0
chr3	15708742	15901278	193	3p25.1	ANKRD28	2.857	1	206	S1(5.4)	0
chr2	32853098	33046118	193	2p22.3	TTC27	0.704	1	210	S1(4.9)	0
chr8	67579830	67772707	193	8q13.1	C8orf44-SGK3	0.487	1	203	S1(5.2)	0
chr6	149539776	149732749	193	6q25.1	TAB2	1.102	0.488	108	S1(4.8)	0
chrX	73952683	74145282	193	Xq13.3	KIAA2022	0.001	0	0	S4(2.1)	0
chr16	16043433	16236931	193	16p13.11	ABCC1	1.278	1	215	S1(5.4)	0
chr2	173940162	174132738	193	2q31.1	MLTK	1.948	0.998	200	S1(5.2)	0
chr4	139741107	139933800	193	4q31.1	RP11-371F15.3	0.01	0.214	206	S2(4.3)	0
chr15	64472546	64665980	193	15q22.31	CTD-2116N17.1	1.262	1	226	S1(5.4)	0
chr16	76770238	76962066	192	16q23.1	CTD-2336H13.2	0	0	0	G2(1.4)	0
chr11	45950870	46142985	192	11p11.2	PHF21A	1.03	0.997	202	S1(5)	0
chr8	77403434	77595513	192	8q21.11	ZFHX4-AS1	0.019	0.463	89	S2(3.9)	0
chr2	49189295	49381676	192	2p16.3	FSHR	0.001	0.016	3	S4(1.8)	0
chr11	32623791	32816204	192	11p13	CCDC73	0.002	0	0	S2(3.8)	0
chr12	120123594	120315095	192	12q24.23	CIT	0.799	1	224	S2(4.1)	0
chr16	77822426	78014004	192	16q23.1	VAT1L	0.027	1	194	S3(2.9)	0
chr12	29302035	29493913	192	12p11.22	FAR2	0.042	1	198	S3(3.3)	0
chr2	233924676	234116549	192	2q37.1	INPP5D	0	0	0	S3(3.4)	0
chr4	175558064	175750465	192	4q34.1	GLRA3	0	0	0	S4(1.8)	0
chr8	128302061	128494384	192	8q24.21	CASC8	0.003	0	0	S2(4.1)	0
chr15	93160672	93353114	192	15q26.1	FAM174B	0.087	0.997	200	S1(4.8)	0
chr8	69824037	70016425	192	8q13.2	RP11-600K15.1	0.274	1	253	S2(4.1)	0
chr13	33160563	33352157	192	13q13.1	PDS5B	1.157	1	217	S2(4.4)	0
chr1	169631244	169823221	192	1q24.2	C1orf112	0.086	0.316	87	S3(3)	0
chr15	64457715	64648442	191	15q22.31	CSNK1G1	1.366	1	226	S1(5.4)	0
chr3	193119865	193310900	191	3q29	ATP13A4	0.002	0.086	24	S4(2.2)	0
chr17	80709939	80900724	191	17q25.3	TBCD	0.324	1	205	S1(4.9)	0
chr15	57884230	58074960	191	15q21.3	POLR2M	0.118	0.929	158	S2(3.9)	0
chr13	111766905	111958084	191	13q34	ARHGEF7	1.114	0.798	183	S3(3.2)	0
chr16	15528151	15718885	191	16p13.11	C16orf45	2.08	1	210	S1(4.8)	0
chr6	47845763	48036425	191	6p12.3	PTCHD4	0.046	1	244	S4(1.7)	0
chr19	28284395	28475892	191	19q11	LLNLF-65H9.1	0.048	0.528	102	S4(1.5)	0
chr2	203241658	203432474	191	2q33.1-2	BMPR2	1.375	1	238	S1(5.2)	0
chr19	2511216	2702707	191	19p13.3	GNG7	0.006	0.11	15	G1(5.5)	0
chr5	140201221	140391929	191	5q31.3	PCDHA5	0.009	0	0	S3(3)	0
chr14	81421332	81612646	191	14q31.1	TSHR	0.002	0.052	10	S3(2.8)	0
chr1	222988405	223179337	191	1q41	DISP1	0.253	1	202	S2(3.6)	0
chr1	42929000	43120335	191	1p34.2	CCDC30	0.025	0.693	140	S2(4)	0
chr8	143293440	143484601	191	8q24.3	TSNARE1	0.056	0.748	143	S3(2.7)	0
chr11	86142631	86333909	191	11q14.2	RP11-317J19.1	0.013	0.347	122	G1(5.6)	0
chrX	154064062	154255215	191	Xq28	F8	0.011	0.393	67	S2(3.8)	0
chr7	84624868	84816171	191	7q21.11	SEMA3D	0.179	0.991	190	S3(3.3)	0
chr11	27528384	27719721	191	11p14.1	BDNF-AS	0.097	1	197	S1(4.8)	0
chr11	113930314	114121398	191	11q23.2	ZBTB16	0	0	0	S2(3.8)	0
chr14	76776956	76968178	191	14q24.3	ESRRB	0.004	0.071	173	S3(3.2)	0
chr9	123151146	123342448	191	9q33.2	CDK5RAP2	0.741	1	197	S1(4.7)	0
chr10	86088341	86278273	190	10q23.1	CCSER2	2.801	1	237	S2(3.8)	0
chr1	102665294	102855186	190	1p21.1	RP11-202K23.1	0.002	0	0	S4(1.5)	0
chr14	91336798	91526980	190	14q32.11	RPS6KA5	0.024	0.997	218	S3(3.3)	0
chr8	74600925	74791089	190	8q21.11	RP11-463D19.2	0.799	0.848	332	S2(4.2)	0
chr5	36876860	37066515	190	5p13.2	NIPBL	1.918	1	206	S2(3.6)	0
chrX	117629860	117820126	190	Xq24	DOCK11	0.245	0.997	220	S1(4.6)	0
chr8	87566204	87755903	190	8q21.3	CNGB3	0.002	0.026	5	S4(2.1)	0
chr14	80663872	80854100	190	14q31.1	DIO2	0.013	0.077	16	S2(4.2)	0
chr6	119280927	119470552	190	6q22.31	FAM184A	0.002	0	0	S3(3)	0
chr2	53897429	54087297	190	2p16.2	ASB3	0.633	1	239	S2(4.2)	0
chr2	165510133	165700189	190	2q24.3	COBLL1	0.608	0.986	219	S2(3.5)	0
chr13	24982294	25171814	190	13q12.12	TPTE2P6	0.001	0	0	S2(3.6)	0
chr14	59294951	59484046	189	14q23.1	RP11-112J1.2	0.006	0	0	S2(4.3)	0
chr3	28390636	28579613	189	3p24.1	ZCWPW2	0.179	1	227	S4(2.3)	0
chr14	73741814	73930348	189	14q24.2-3	NUMB	2.168	1	190	G1(5.6)	0
chr4	74979890	75168816	189	4q13.3	MTHFD2L	0.111	0.769	151	S1(4.7)	0
chr2	199747296	199936514	189	2q33.1	AC018717.1	0.005	0	0	S4(2.1)	0
chr2	3192695	3381653	189	2p25.3	TSSC1	0.398	1	231	S2(3.8)	0
chr8	72315674	72504260	189	8q13.3	RP11-1102P16.1	0.001	0	0	S4(2.4)	0
chr8	92221721	92410378	189	8q21.3	SLC26A7	0.002	0	0	S3(2.6)	0
chr3	101043048	101232085	189	3q12.3	SENP7	0.582	1	193	S2(4.3)	0
chr17	15932470	16121499	189	17p11-12	NCOR1	1.846	0.989	216	S1(4.9)	0
chr1	179334854	179523870	189	1q25.2	AXDND1	0.069	1	221	S2(4)	0
chr7	91321322	91510034	189	7q21.2	MTERF	0.207	1	238	S2(3.6)	0
chr7	121513142	121702090	189	7q31.32	PTPRZ1	0.001	0	0	S4(2.2)	0
chr3	8817087	9005457	188	3p25.3	RAD18	0.565	1	194	S1(5)	0
chr4	11627337	11815582	188	4p15.33	RP11-281P23.2	0	0	0	S4(2.3)	0
chr8	30241943	30429778	188	8p12	RBPMS	5.19	1	213	S1(5.1)	0
chr15	25922419	26110317	188	15q12	ATP10A	1.669	0.99	199	S2(3.9)	0
chr10	123499938	123688316	188	10q26.13	ATE1	0.591	0.996	195	S2(3.6)	0
chr8	61591336	61779465	188	8q12.1-2	CHD7	0.086	0.994	194	S4(2.4)	0
chr11	48002112	48189670	188	11p11.2	PTPRJ	1.937	0.998	205	S1(5.4)	0
chr4	99391517	99579780	188	4q23	TSPAN5	1.606	1	194	S1(4.8)	0
chr7	20875049	21062767	188	7p15-21	AC006481.1	0	0	0	S4(1.6)	0
chr1	54691104	54879152	188	1p32.3	SSBP3	0.569	1	197	S1(4.9)	0
chr6	3269195	3457256	188	6p25.2	SLC22A23	0.533	0.996	201	S1(4.8)	1			1		1
chr18	53670843	53858493	188	18q21.2-31	CTD-2008L17.2	0.003	0	0	S2(4.2)	0
chr10	98757794	98945677	188	10q24.1	SLIT1	0	0	0	S1(4.5)	0
chr12	131438451	131626014	188	12q24.33	GPR133	0.031	1	200	S3(2.5)	0
chr2	39476406	39664453	188	2p22.1	MAP4K3	2.204	1	208	S1(5.1)	0.595		1			1
chr1	244617678	244804479	187	1q44	C1orf101	0.148	1	202	S2(4.1)	0
chr12	59989847	60176395	187	12q14.1	SLC16A7	0.612	0.97	154	S3(3.1)	0
chr4	89442198	89629693	187	4q22.1	HERC3	1.242	0.764	117	S1(4.9)	1			1		1
chr4	154073493	154260472	187	4q31.3	TRIM2	0.509	0.989	190	S1(4.9)	0
chr2	28680011	28866654	187	2p23.2	PLB1	0.002	0	0	G1(5.5)	0
chr3	12045875	12232900	187	3p25.2	SYN2	0.001	0	0	S2(4.4)	0
chr8	48685668	48872743	187	8q11.21	PRKDC	1.467	1	222	S1(4.7)	0
chr16	77281709	77469011	187	16q23.1	ADAMTS18	0.001	0	0	S3(2.6)	0
chr2	52949814	53137158	187	2p16.2	AC010967.2	0	0	0	S4(2.2)	0
chr11	22647187	22834601	187	11p14.3	GAS2	0.005	0.242	51	S4(1.6)	0
chr16	20621564	20808903	187	16p12.3	ACSM3	0.001	0	0	S3(3.1)	0
chr6	116575335	116762424	187	6q22.1	DSE	0.83	1	190	S1(5)	0
chrX	66764464	66950461	186	Xq12	AR	0.234	1	197	S4(2.4)	0
chr5	122179133	122365049	186	5q23.2	SNX24	1.047	1	193	S3(3.1)	0
chr3	133784146	133969689	186	3q22.2	RYK	0.897	0.9	167	S1(5.4)	0
chr2	238536218	238722325	186	2q37.3	LRRFIP1	1.583	0.998	241	G1(5.5)	0
chrX	106057100	106243474	186	Xq22.3	MORC4	0.193	0.553	103	S2(3.5)	0
chr18	6729716	6915715	186	18p11.31	ARHGAP28	0	0	0	S3(2.9)	0
chrX	85116184	85302566	186	Xq21.2	CHM	1.167	1	198	S4(1.7)	0
chr5	88013974	88199922	186	5q14.3	MEF2C	0.366	0.896	185	S4(2.4)	0
chr6	24171983	24358280	186	6p22.3	DCDC2	0	0	0	S4(2.2)	0
chr8	77593453	77779521	186	8q21.11	ZFHX4	1.825	1	224	S3(3.2)	0
chr13	99853027	100038688	186	13q32.3	UBAC2	0.878	0.997	194	S2(4.1)	0
chr6	111620233	111804918	185	6q21	REV3L	2.675	0.998	193	S1(4.8)	0
chr9	105902804	106087316	185	9q31.1	RP11-341A22.2	0.002	0.016	3	G2(1.3)	0
chr5	118788137	118972894	185	5q23.1	HSD17B4	0.253	0.614	114	S3(3.4)	0
chr1	182098444	182283196	185	1q25.3	GS1-122H1.2	0	0	0	S4(2.4)	0
chr7	24836157	25021253	185	7p15.3	OSBPL3	2.134	0.991	210	S1(5.2)	0
chr4	73939092	74124515	185	4q13.3	ANKRD17	3.165	1	189	S3(3.1)	0
chr2	144052989	144238358	185	2q22.2-3	AC096558.1	0.001	0	0	S3(3.1)	0
chrX	83572881	83757487	185	Xq21.1	HDX	0.21	1	216	S4(2.1)	0
chr18	20303453	20487684	184	18q11.2	RP11-370A5.1	0.015	0.251	73	S1(4.8)	0
chr19	4969124	5153606	184	19p13.3	KDM4B	0.504	1	244	G1(5.5)	0
chr5	140207562	140391929	184	5q31.3	PCDHA6	0.009	0	0	S3(3)	0
chr22	42556018	42739622	184	22q13.2	TCF20	0.435	1	189	S1(4.5)	0
chr8	108911543	109095913	184	8q23.1	RSPO2	0.001	0.033	6	S4(2.2)	0
chr14	56584531	56768244	184	14q22.3	PELI2	0.059	0.989	191	S3(3.2)	0
chr3	28616281	28799831	184	3p24.1	LINC00693	0.025	1	185	S3(2.7)	0
chr4	130692813	130876523	184	4q28.2	RP11-422J15.1	0	0	0	G2(1.3)	0
chr16	47758478	47942342	184	16q12.1	RP11-523L20.2	0.003	0	0	S2(3.6)	0
chr1	184759857	184943682	184	1q25.3	FAM129A	0.358	1	213	S1(4.6)	0
chr5	87803362	87986858	183	5q14.3	LINC00461	0	0	0	S4(2.3)	0
chr7	86506221	86689015	183	7q21.12	KIAA1324L	0.173	1	228	S4(2)	0
chr2	237232793	237416185	183	2q37.2-3	IQCA1	0.008	0.309	58	S3(3)	0
chr1	112719855	112903150	183	1p13.2	RP5-965F6.2	0	0	0	S1(4.5)	0
[truncated: 30,884 more rows]

## Sheet: HF1
											number_of_CNVs
chrom	start	end	size(Kb)	band	name	RPKM	txn_coverage	longest_txn_unit(Kb)	rep_timing	CNV_coverage	APH	PCR	all
chr7	145813452	148118090	2305	7q35-36	CNTNAP2	0.001	0	0	G2(1.4)	0
chr9	8314245	10612723	2298	9p23-24	PTPRD	0	0	0	G2(1.4)	0
chrX	31115793	33357558	2242	Xp21.1-2	DMD	0.019	0.068	152	S4(1.8)	0
chr3	115521234	117716095	2195	3q13.31-32	LSAMP	0.001	0.001	3	S4(2.4)	0
chr11	83166054	85338966	2173	11q14.1	DLG2	0.005	0.051	111	S4(2.2)	0
chr8	2792874	4852494	2060	8p23.2	CSMD1	0	0	0	G2(1.4)	0
chr20	13976014	16033842	2058	20p12.1	MACROD2	0.003	0	0	S3(2.8)	0.065	1		1
chr6	64429875	66417118	1987	6q12	EYS	0	0	0	S4(1.6)	0
chr2	140988991	142889270	1900	2q22.1-2	LRP1B	0	0.003	3	S4(1.9)	0.016	1		1
chr10	55562530	57387702	1825	10q21.1	PCDH15	0	0	0	G2(1.4)	0
chr10	67672275	69455927	1784	10q21.3	CTNNA3	0	0	0	S4(1.9)	0
chr3	75955845	77699115	1743	3p12.3	ROBO2	0.034	0.353	614	S4(1.8)	0
chr16	6069094	7763340	1694	16p13.3	RBFOX1	0	0	0	S4(1.6)	0
chr14	78708733	80330762	1622	14q24-31	NRXN3	0.068	0.361	602	S4(2.3)	0
chr5	58264864	59817947	1553	5q11-12	PDE4D	0.021	0.516	803	S3(3.1)	0
chr1	57460450	59012406	1552	1p32.1-2	DAB1	0.153	1	1559	S3(3.1)	0.114		2	2
chr16	5289802	6826015	1536	16p13.3	RP11-420N3.2	0	0	0	S4(1.8)	0
chr3	59735035	61237133	1502	3p14.2	FHIT	0.005	0	0	S4(1.8)	0
chr1	48998526	50489585	1491	1p33	AGBL4	0	0	0	S4(1.6)	0
chr4	91048685	92523064	1474	4q22.1	CCSER1	0	0	0	G2(1.3)	0
chr4	93225549	94695707	1470	4q22.1-2	GRID2	0	0	0	G2(1.3)	0
chr13	92050928	93519490	1469	13q31.3	GPC5	0	0	0	S4(1.5)	0
chr2	79412356	80875905	1464	2p12	CTNNA2	0	0	0	S4(1.9)	0
chr7	77646392	79082890	1436	7q21.11	MAGI2	0.935	1	1464	S2(4.1)	0.239	2		2
chr2	115199875	116603328	1403	2q14.1	DPP10	0	0	0	G2(1.4)	0
chr6	161768451	163148803	1380	6q26	PARK2	0.01	0.162	224	S4(1.7)	0
chr2	51259738	52635055	1375	2p16.3	AC007682.1	0	0	0	G2(1.4)	0
chrX	28605515	29974840	1369	Xp21.2-3	IL1RAPL1	0.005	0	0	S4(2.4)	0
chr3	174156362	175523428	1367	3q26.31	NAALADL2	0.464	1	1375	S3(3.1)	0.181	2		2
chr11	40135752	41481323	1346	11p12	LRRC4C	0	0	0	S4(1.5)	0
chrX	37208582	38546928	1338	Xp11-21	TM4SF2	0.074	0.107	144	S3(3.2)	0
chr11	98891682	100229616	1338	11q22.1	CNTN5	0	0	0	G2(1.4)	0
chr10	52750944	54058110	1307	10q11-21	PRKG1	0.936	1	1325	S3(3.4)	0.268	8		8
chr3	17198653	18486309	1288	3p24.3	TBC1D5	0.341	0.536	604	S3(3.2)	0
chr12	99120234	100378432	1258	12q23.1	ANKS1B	0.015	0.312	234	S4(2.3)	0.395	3		3
chr4	172733404	173962710	1229	4q34.1	GALNTL6	0	0	0	S4(1.7)	0
chr4	20730238	21950422	1220	4p15.2-31	KCNIP4	0.002	0	0	S3(2.6)	0
chr21	36160097	37376965	1217	21q22.12	RUNX1	0.913	0.223	290	S1(4.9)	0
chr8	113235156	114449328	1214	8q23.3	CSMD3	0	0	0	G2(1.3)	0
chrX	103810995	105011822	1201	Xq22.3	IL1RAPL2	0	0	0	S4(2.1)	0
chr7	69063904	70258054	1194	7q11.22	AUTS2	0.034	0.083	108	S4(1.6)	0
chr18	49866541	51057784	1191	18q21.2	DCC	0	0	0	S4(1.5)	0
chr13	93879094	95059655	1181	13q31-32	GPC6	0	0	0	S3(2.7)	0
chr3	78646389	79816965	1171	3p12.2-3	ROBO1	0.244	0.361	435	S4(2.4)	0
chr16	82660407	83830204	1170	16q23.3	CDH13	0.058	1	1172	S3(3)	0.188	2		2
chr2	212240445	213403565	1163	2q34	ERBB4	0	0	0	S4(1.7)	0
chr17	31340104	32501983	1162	17q11-12	ASIC2	0.002	0.004	5	S3(2.7)	0
chr8	13947372	15095848	1148	8p22	SGCZ	0	0	0	S4(1.6)	0
chr2	214149112	215275225	1126	2q34	SPAG16	0.049	0.564	396	S3(2.5)	0
chr8	31496901	32622548	1126	8p12	NRG1	1.307	0.197	223	S2(3.8)	0
chr11	132284870	133402414	1118	11q25	OPCML	0.001	0	0	S3(2.7)	0
chr20	40701391	41818610	1117	20q12-13	PTPRT	0	0	0	S4(1.8)	0
chr3	85008131	86123579	1115	3p12.1	CADM2	0	0	0	G2(1.3)	0
chr2	50145642	51259674	1114	2p16.3	NRXN1	0	0.003	3	G2(1.4)	0
chr16	78133309	79246564	1113	16q23.1-2	WWOX	0.036	0.726	568	S4(1.8)	0.076	1		1
chr10	83635069	84746935	1112	10q23.1	NRG3	0	0	0	S4(1.5)	0
chr5	19473059	20575982	1103	5p14.3	CDH18	0.222	0.468	535	S4(1.9)	0
chr5	21750781	22853731	1103	5p14.3	CDH12	0	0	0	G2(1.3)	0
chr7	153584181	154685995	1102	7q36.2	DPP6	0	0	0	S4(1.6)	0
chr2	205410515	206484886	1074	2q33.3	PARD3B	0.784	1	1109	S3(3)	0.042	1		1
chr7	157331749	158380480	1049	7q36.3	PTPRN2	0.001	0.029	32	S3(2.7)	0
chrX	22277913	23311263	1033	Xp22.11	RP11-40F8.2	0	0	0	S4(2.3)	0
chr6	124125285	125146803	1022	6q22.31	NKAIN2	0	0	0	S4(1.8)	0
chr5	103718998	104728671	1010	5q21.2-3	RP11-6N13.1	0	0	0	G2(1.4)	0
chr9	119187503	120177348	990	9q33.1	ASTN2	0.122	1	1015	S3(2.9)	0
chr1	6845383	7829766	984	1p36.23-31	CAMTA1	0.201	0.805	793	S2(3.9)	0
chr5	166711803	167691162	979	5q34	TENM2	0.006	0	0	S3(3)	0
chr3	6811687	7783215	972	3p26.1	GRM7	0	0.003	3	G2(1.4)	0
chr7	3341079	4308632	968	7p22.2	SDK1	0	0	0	S4(1.9)	0
chr11	131240372	132206716	966	11q25	NTM	0.065	0.442	429	S2(3.8)	0
chr3	55542335	56502391	960	3p14.3	ERC2	0	0	0	S3(3.1)	0
chr4	98105243	99064391	959	4q22-23	STPG2	0.008	0	0	S4(2)	0
chr3	2140496	3099645	959	3p26.2-3	CNTN4	0	0	0	G2(1.4)	0
chr10	77360997	78319925	959	10q22.2-3	C10orf11	0.002	0	0	S3(3.1)	0
chr18	3496029	4455335	959	18p11.31	DLGAP1	0.004	0.029	19	S3(3.3)	0
chr3	21459914	22414812	955	3p24.3	ZNF385D	0	0	0	S4(2.4)	0
chr3	54156573	55108584	952	3p14-21	CACNA2D3	0.006	0.183	174	S3(3.1)	0
chr3	96533424	97471304	938	3q11.2	EPHA6	0	0	0	G2(1.4)	0
chr3	158680023	159615155	935	3q25.32-33	IQCJ-SCHIP1	0.63	0.201	204	S1(4.9)	0
chr5	10971951	11904155	932	5p15.2	CTNND2	0	0	0	S4(2.1)	0
chr13	66876966	67804468	928	13q21.32	PCDH9	0.003	0.03	30	S4(2.2)	0
chrX	95939661	96859996	920	Xq21.33	DIAPH2	0.475	1	936	S4(2.3)	0.37	3		3
chr4	54243809	55161439	918	4q12	FIP1L1	0.239	0.189	99	S1(5.2)	0
chr9	73143978	74061820	918	9q21.12-13	TRPM3	0.001	0.017	16	S2(3.6)	0
chr7	18126571	19042039	915	7p21.1	HDAC9	0.749	0.554	533	S2(3.6)	0
chr2	137523114	138435287	912	2q22.1	THSD7B	0.001	0	0	S4(1.8)	0
chr14	68286495	69196935	910	14q24.1	RAD51B	0.149	0.963	881	S1(5.1)	0
chr11	20691116	21597227	906	11p15.1	NELL1	0	0	0	S4(1.5)	0
chr7	110303109	111202573	899	7q31.1	IMMP2L	0.302	1	928	S4(2.4)	0.056	2		2
chr2	133429373	134326034	897	2q21.2	NCKAP5	0.049	0.676	606	S2(3.7)	0
chr5	155297353	156194799	897	5q33.2-3	SGCD	0.211	0.493	456	S4(2.1)	0
chr2	124782863	125672864	890	2q14.3	CNTNAP5	0	0	0	S4(1.6)	0
chr3	173114073	174004434	890	3q26.31	NLGN1	0.653	1	910	S3(3)	0.353	1		1
chr1	71861622	72748417	887	1p31.1	NEGR1	0.28	1	924	S4(2)	0.422	4		4
chr15	86685226	87572283	887	15q25.3	AGBL1	0	0	0	S4(1.8)	0
chr8	50822348	51706678	884	8q11.21	SNTG1	0	0	0	S4(1.9)	0
chr2	59445814	60327335	882	2p16.1	RP11-444A22.1	0	0	0	S4(1.5)	0
chr4	62066975	62944053	877	4q13.1	LPHN3	0	0	0	G2(1.4)	0
chr5	163723701	164598649	875	5q34	CTC-340A15.2	0	0	0	G2(1.3)	0
chr14	33404138	34273382	869	14q13.1	NPAS3	0.014	0.105	91	S3(3.2)	0
chr8	100025493	100889808	864	8q22.2	VPS13B	0.947	1	872	S2(3.9)	0
chr4	164445449	165305202	860	4q32.2-3	2014-03-01	0	0	0	G2(1.4)	0
chr12	86372515	87232681	860	12q21.31-32	MGAT4C	0	0	0	S4(1.6)	0
chr10	116853123	117708503	855	10q25.3	ATRNL1	0	0	0	S4(2.3)	0
chr10	23983674	24836772	853	10p12.1-2	KIAA1217	0.037	0.12	103	S3(2.8)	0
chr3	180707557	181554668	847	3q26.33	SOX2-OT	0.004	0.002	88	S4(1.5)	0
chr2	76974844	77820445	846	2p12	LRRTM4	0	0	0	G2(1.3)	0
chrX	91034259	91878229	844	Xq21.31-32	PCDH11X	0	0	0	G2(1.4)	0
chr1	97543298	98386605	843	1p21.3	DPYD	1.496	1	870	S2(4)	0.149	2		2
chr18	7566779	8406859	840	18p11.23	PTPRM	0.94	1	846	S3(2.6)	0.039	2		2
chr11	81590892	82429124	838	11q14.1	RP11-179A16.1	0	0	0	S4(1.9)	0
chr21	41382925	42219065	836	21q22.2	DSCAM	0	0.006	5	S4(1.8)	0
chr1	174128547	174964445	836	1q25.1	RABGAP1L	0.447	1	841	S3(2.6)	0
chr20	8112823	8949003	836	20p12.3	PLCB1	0.516	1	841	S2(4.2)	0
chr14	47308825	48144157	835	14q21.3	MDGA2	0	0	0	G2(1.4)	0
chr12	129556269	130388211	832	12q24.33	TMEM132D	0	0	0	S4(1.5)	0
chr7	14184673	15014402	830	7p21.2	DGKB	0.002	0	0	S4(2.1)	0
chr8	105602960	106431488	829	8q22-23	RP11-127H5.1	0.003	0.019	19	S3(3.2)	0
chr4	142944312	143768585	824	4q31.21	INPP4B	2.229	1	857	S2(4.4)	0
chr10	13685705	14504141	818	10p13	FRMD4A	0.741	0.447	406	S1(4.9)	0.036	1		1
chr7	126078651	126893348	815	7q31.33	GRM8	0.001	0	0	S4(1.5)	0
chr7	132937828	133751342	814	7q33	EXOC4	0.75	1	849	S4(2.4)	0
chr3	114056940	114866118	809	3q13.31	ZBTB20	1.132	1	831	S2(4.4)	0
chr1	215796235	216596738	801	1q41	USH2A	0	0	0	S3(2.8)	0
chr1	237205504	237997288	792	1q43	RYR2	0	0.004	3	S4(1.6)	0
chr11	78363875	79151992	788	11q14.1	TENM4	0.086	1	795	S3(3.3)	0
chr4	162305048	163085187	780	4q32.2	FSTL5	0	0	0	S4(2.3)	0
chr10	100218874	100995619	777	10q24.2	HPSE2	0.001	0	0	S2(3.5)	0
chr11	15987994	16761138	773	11p15.1-2	SOX6	0.003	0.032	25	S3(2.5)	0
chr11	19372270	20143144	771	11p15.1	NAV2	1.953	0.683	574	S1(5)	0
chr10	78629358	79398353	769	10q22.3	KCNMA1	2.909	1	797	S1(4.9)	0
chr10	87359311	88126250	767	10q23.1-2	GRID1	0	0	0	S4(2.3)	0
chr3	3742497	4508965	766	3p26.1-2	SUMF1	0.154	1	873	S4(1.5)	0
chr22	33558211	34318829	761	22q12.3	LARGE	0.485	0.952	724	S4(2.2)	0.094	1		1
chr1	245912641	246670614	758	1q44	SMYD3	0.673	1	832	S2(3.9)	0.271	3		3
chr8	104512975	105268322	755	8q22.3	RIMS2	0.23	1	758	S3(3)	0
chr6	69345258	70099403	754	6q12-13	BAI3	0	0	0	S4(1.5)	0
chr3	131252398	132004254	752	3q22.1	CPNE4	0.003	0.04	30	S3(2.8)	0
chr8	63161149	63912211	751	8q12.3	NKAIN3	0	0.005	4	S4(1.8)	0
chr4	151185593	151936879	751	4q31.3	LRBA	0.344	1	778	S2(4)	0
chr2	21444046	22193831	750	2p24.1	AC067959.1	0	0	0	S4(2.2)	0
chr8	87878669	88627447	749	8q21.3	CNBD1	0	0	0	S4(1.6)	0
chr7	90095737	90839905	744	7q21.13	CDK14	0.671	1	923	S2(3.9)	0
chr13	96743092	97485671	743	13q32.1	HS6ST3	0	0	0	S4(2)	0
chrY	4868266	5610265	742	Yp11.2	PCDH11Y	0	0	0	NULL	0
chr15	60780482	61521518	741	15q22.2	RORA	0.184	1	750	S2(4)	0.214	3		3
chr8	85095021	85834079	739	8q21.2	RALYL	0	0	0	G2(1.3)	0
chr3	187871071	188608460	737	3q27-28	LPP	2.174	1	824	S1(4.7)	0
chr3	61547242	62283288	736	3p14.2	PTPRG	0.722	1	759	S3(2.7)	0
chr13	35516423	36247159	731	13q13.3	NBEA	0.436	1	736	S2(3.8)	0
chr2	11988747	12718474	730	2p24-25	AC096559.1	0.001	0.004	106	S2(4.2)	0
chr2	29415639	30144432	729	2p23.1-2	ALK	0.002	0	0	S3(3.3)	0
chr3	29322472	30051886	729	3p24.1	RBMS3	1.147	1	746	S2(3.7)	0
chr8	140742585	141468678	726	8q24.3	TRAPPC9	0.326	1	748	S2(3.5)	0
chr7	40174574	40900362	726	7p14.1	C7orf10	0.166	1	944	S2(4)	0
chr9	27948075	28670283	722	9p21.1-2	LINGO2	0.15	1	726	G2(1.3)	0
chr12	2079951	2802108	722	12p13.33	CACNA1C	2.219	0.887	659	S1(4.9)	0
chr3	41288089	42003922	716	3p22.1	ULK4	0.164	1	751	S3(3.2)	0
chr17	58754813	59470199	715	17q23.2	BCAS3	0.319	1	722	S1(4.8)	0
chr3	50712671	51421629	709	3p21.2	DOCK3	0.014	0.196	51	S3(3.4)	0
chr10	61786055	62493248	707	10q21.2	ANK3	0.002	0	0	S2(3.9)	0
chr2	63348517	64054977	706	2p15	WDPCP	0.195	1	723	S2(4.2)	0
chr10	34398487	35104253	706	10p11.21-22	PARD3	0.502	1	710	S2(4)	0
chr22	28374003	29075853	702	22q12.1	TTC28	0.627	1	718	S1(4.6)	0
chr13	78493823	79191463	698	13q22-31	RNF219-AS1	0	0	0	S3(2.5)	0
chr6	20534687	21232635	698	6p22.3	CDKAL1	0.596	1	724	S3(2.9)	0
chr13	107820882	108519083	698	13q33.3	FAM155A	0.012	0	0	S4(1.5)	0
chr2	13850655	14541087	690	2p24.3	LINC00276	0	0	0	S4(1.7)	0
chr20	59827481	60515673	688	20q13.33	CDH4	0.053	0.999	689	S3(2.6)	0
chr1	81771844	82458120	686	1p31.1	LPHN2	0.003	0.006	4	S3(2.6)	0
chr15	71389290	72075722	686	15q23	THSD4	0.509	1	696	S1(5.1)	0.189	1		1
chr3	65339199	66024509	685	3p14.1	MAGI1	1.236	1	758	S2(3.9)	0
chrX	85403461	86087607	684	Xq21.2	DACH2	0	0	0	G2(1.4)	0
chr13	102372133	103054124	682	13q33.1	FGF14	0	0.004	3	S3(2.6)	0
chr8	64599736	65281115	681	8q12.3	RP11-32K4.1	0	0	0	S4(1.5)	0
chr2	143848930	144525921	677	2q22.2-3	ARHGAP15	0	0	0	S3(2.9)	0
chr14	66974124	67648520	674	14q23.3	GPHN	0.332	1	683	S2(3.8)	0
chr6	101846663	102517958	671	6q16.3	GRIK2	1.991	1	680	S3(2.8)	0
chr5	95297704	95966789	669	5q15	CTD-2337A12.1	0.167	1	824	S1(5.3)	0
chr7	71244475	71912136	668	7q11.22	CALN1	0.001	0	0	S4(2)	0
chr11	89984399	90648220	664	11q14.3	DISC1FP1	0.004	0.005	3	S4(1.5)	0
chr4	102332442	102995969	664	4q24	BANK1	0	0	0	S3(3.4)	0
chr3	134316642	134979309	663	3q22.2	EPHB1	0.03	1	674	S3(3)	0
chr3	7994491	8653610	659	3p26.1	LMCD1-AS1	0.021	0.44	290	S2(3.7)	0
chr6	165740775	166400091	659	6q27	PDE10A	0	0	0	G2(1.4)	0
chr4	183065139	183724177	659	4q34-35	TENM3	0.49	1	668	S3(2.8)	0
chr10	128593977	129250781	657	10q26.2	DOCK1	1.122	1	670	S4(2.4)	0
chr13	25946208	26599989	654	13q12.13	ATP8A2	0	0	0	S4(2.3)	0
chr1	33979608	34631443	652	1p34-35	CSMD2	0.206	1	653	S2(3.7)	0
chr11	70313960	70963623	650	11q13.3-4	SHANK2	0	0	0	S3(2.7)	0
chr2	72403112	73053170	650	2p13.2	EXOC6B	0.852	1	673	S2(3.8)	0
chr2	65663844	66311773	648	2p14	AC074391.1	0.009	0.236	158	S2(3.7)	0
chr3	123798869	124445172	646	3q21.1-2	KALRN	0.497	1	698	S1(4.7)	0
chr3	139654026	140296239	642	3q23	CLSTN2	0	0	0	S4(1.7)	0
chr13	50656306	51297372	641	13q14.2-3	DLEU1	0.053	1	660	S2(4)	0
chr5	168088744	168728133	639	5q34-35	SLIT3	0.111	0.996	638	S3(3.1)	0
chr2	236402732	237040444	638	2q37.2	AGAP1	0.603	1	674	S4(2.3)	0
chr2	58654933	59290901	636	2p16.1	AC007092.1	0	0	0	S3(3)	0
chr1	216676587	217311097	635	1q41	ESRRG	0	0	0	S4(1.7)	0
chr5	89825160	90460038	635	5q14.3	GPR98	0.001	0.008	60	S3(3)	0
chr6	129204341	129837714	633	6q22.33	LAMA2	1.569	1	649	S2(4.4)	0
chr14	72399155	73030654	631	14q24.2	RGS6	0	0	0	S2(3.9)	0
chr3	71003843	71633140	629	3p13	FOXP1	1.352	0.999	645	S2(4.2)	0
chr3	191857183	192485553	628	3q28-29	FGF12	0.007	0.143	195	S4(2)	0
chr4	81256873	81884910	628	4q21.21	C4orf22	0.371	1	781	S2(4)	0
chr10	106400858	107024993	624	10q25.1	SORCS3	0	0	0	S4(2.1)	0
chr5	136310986	136934068	623	5q31.2	SPOCK1	0.212	0.842	548	S2(3.8)	0
chr6	1624040	2245926	622	6p25.3	GMDS	0.266	1	657	S3(3.3)	0
chr6	74779166	75400443	621	6q13	RP11-554D15.1	0.003	0	0	S2(4)	0
chr4	82347546	82965397	618	4q21.21-22	RASGEF1B	0.001	0	0	S4(2.4)	0
chr8	24153326	24769586	616	8p21.2	RP11-624C23.1	0	0	0	S3(3.3)	0
chr15	54305100	54920806	616	15q21.3	UNC13C	0	0	0	S4(1.6)	0
chr14	30045686	30661104	615	14q12	PRKD1	0.718	0.572	362	S3(3.4)	0
chr6	9596342	10211841	615	6p24.3	OFCC1	0.013	0.375	119	S3(3.2)	0
chr13	109248499	109860355	612	13q33.3	MYO16	0.001	0	0	S3(2.9)	0
chr7	113726381	114333827	607	7q31.1	FOXP2	0.002	0	0	S4(2.3)	0
chr6	62389864	62996132	606	6q11.1	KHDRBS2	0	0	0	G2(1.4)	0
chr8	96216683	96822364	606	8q22.1	KB-1047C11.2	0.006	0.007	4	S2(3.6)	0
chr5	151998524	152603103	605	5q33.1	AC091969.1	0	0	0	S4(1.8)	0
chr7	13141015	13743774	603	7p21.3	AC011288.2	0	0	0	S4(2.2)	0
chr2	164606082	165208733	603	2q24.3	AC092684.1	0.001	0	0	S4(2.3)	0
chr1	61330930	61928465	598	1p31.3	NFIA	0.038	0.648	388	S3(3.1)	0
chr16	12070593	12668146	598	16p13.12-13	SNX29	0.894	1	636	S2(4.3)	0
chr2	22156207	22753977	598	2p24.1	AC068490.2	0	0	0	S4(1.8)	0
chr2	100162322	100759201	597	2q11.2	AFF3	1.385	0.939	580	S2(3.9)	0
chr3	153102722	153697975	595	3q25.2	RP11-23D24.2	0	0	0	S3(2.7)	0
chr7	36893960	37488852	595	7p14.1-2	ELMO1	0	0	0	S4(1.7)	0
chr18	36786887	37380282	593	18q12.2-3	LINC00669	0.325	1	699	S4(1.8)	0
chr10	108333420	108924292	591	10q25.1	SORCS1	0	0	0	S3(2.8)	0
chr2	33931952	34522820	591	2p22.3	AC009499.1	0	0	0	S3(2.5)	0
chrX	137713734	138304939	591	Xq26-27	FGF13	0	0	0	S4(1.5)	0
chr15	47476297	48066420	590	15q21.1	SEMA6D	0.044	0.098	66	S3(2.6)	0
chr1	240931553	241520530	589	1q43	RGS7	0.178	1	615	S2(3.5)	0
chr6	163148163	163736524	588	6q26	PACRG	0.001	0	0	S4(2.3)	0
chrX	123509752	124097666	588	Xq25	TENM1	0	0.005	3	S4(1.5)	0
chr12	79257772	79845788	588	12q21.2	SYT1	0.77	1	628	S2(3.6)	0
chr10	19492778	20079330	587	10p12.31	C10orf112	0	0	0	S4(1.7)	0
chr14	27727922	28314492	587	14q12	CTD-3006G17.2	0	0	0	G2(1.4)	0
chrX	12156584	12742642	586	Xp22.2	FRMPD4	0.354	1	591	S2(3.6)	0
chr11	24518515	25104150	586	11p14.3	LUZP2	0	0	0	G2(1.4)	0
chr1	70034080	70617628	584	1p31.1	LRRC7	0.001	0.007	4	S3(3.1)	0
chr5	88179144	88762215	583	5q14.3	MEF2C-AS1	0.002	0.014	9	S3(3)	0
chr6	98264584	98847748	583	6q16.1	RP11-436D23.1	0	0	0	G2(1.4)	0
chr3	142984063	143567373	583	3q24	SLC9A9	0.001	0	0	S3(3.2)	0
chr1	66258196	66840259	582	1p31.3	PDE4B	0.905	1	588	S1(4.7)	0
chr2	154728425	155310361	582	2q23-24	GALNT13	0	0	0	S4(1.5)	0
chr3	167967309	168548387	581	3q26.2	EGFEM1P	0.001	0	0	S4(2.1)	0
chr5	94039445	94620279	581	5q15	MCTP1	0.131	0.651	398	S3(2.9)	0
chr7	70597154	71178585	581	7q11.22	WBSCR17	0	0	0	S4(1.6)	0
chr7	103969103	104549001	580	7q22.2-3	LHFPL3	0	0.009	5	S2(3.8)	0
chr3	168801286	169381406	580	3q26.2	MECOM	0.073	0.118	67	S3(2.8)	0
chr11	126293253	126873355	580	11q24.2	KIRREL3	1.469	1	589	S1(4.7)	0
chr4	86936275	87515284	579	4q21.3	MAPK10	0.073	1	581	S2(4.4)	0.905	2		2
chr7	88388681	88966346	578	7q21.13	ZNF804B	0	0	0	S4(1.5)	0
chr12	72481045	73059422	578	12q21.1	TRHDE	1.579	0.681	423	S3(2.9)	0
chr6	73331519	73908574	577	6q13	KCNQ5	0.597	1	587	S1(4.8)	0
chr1	171810620	172387606	577	1q24.3	DNM3	0.073	1	580	S1(4.8)	0
chr2	188577542	189152418	575	2q32.1	AC068718.1	0.001	0.016	15	S2(3.8)	0
chr13	43787653	44361044	573	13q14.11	ENOX1	0.008	0	0	S2(4.1)	0
chr5	65892175	66465423	573	5q12.3	MAST4	0.141	0.37	220	S3(3.2)	0
chr6	12717892	13288645	571	6p24.1	PHACTR1	0.119	0.582	341	S2(4)	0
chr12	62102039	62672931	571	12q14.1	FAM19A2	0.012	0.182	104	S4(2.3)	0
chr3	177990719	178562217	571	3q26.32	KCNMB2	0.004	0	0	S3(3.2)	0
chr6	44777053	45345690	569	6p21.1	SUPT3H	0.223	1	582	S2(3.9)	0
chr7	121958480	122526813	568	7q31.32	CADPS2	0.154	1	571	G2(1.4)	0
chr6	144606836	145174170	567	6q24.2	UTRN	1.753	1	597	S2(4.2)	0
chr4	113739264	114304896	566	4q25-26	ANK2	0.012	0.236	67	S2(3.9)	0
chr15	27216428	27778373	562	15q12	GABRG3	0	0	0	S4(1.7)	0
chr15	39157522	39719396	562	15q14	RP11-624L4.1	0.336	0.975	599	S1(5.3)	0
chr11	88237743	88799113	561	11q14.2-3	GRM5	0.002	0	0	S2(3.7)	0
chr8	35092974	35654068	561	8p12	UNC5D	0	0	0	S4(1.5)	0
chr2	162280842	162841792	561	2q24.2	SLC4A10	0.001	0.005	11	S3(3.1)	0
chr14	46410145	46971026	561	14q21.2	LINC00871	0	0	0	G2(1.4)	0
chr1	76540403	77100286	560	1p31.1	ST6GALNAC3	0.004	0	0	S4(2)	0
chr10	75910959	76469061	558	10q22.2	ADK	1.523	1	605	S1(4.6)	0
chr15	76640525	77197785	557	15q24.3	SCAPER	0.312	1	564	S2(4.1)	0
chr8	18384810	18942240	557	8p22	PSD3	0.838	1	591	S2(4.2)	0
chr21	17442841	17999716	557	21q21.1	LINC00478	0.237	1	568	S3(3)	0
chr17	63631655	64188202	557	17q24.1	CEP112	0.569	1	610	S2(4.4)	0
chr15	33603162	34158303	555	15q14	RYR3	0	0	0	S2(3.5)	0
chr1	245318286	245872733	554	1q44	KIF26B	0.641	1	571	S2(3.8)	0.236	2		2
chr12	44229769	44783545	554	12q12	TMEM117	0.399	1	570	S3(2.7)	0.306	1		1
chr3	117723665	118276515	553	3q13.32	RP11-384F7.1	0	0	0	S4(1.7)	0
chr10	1228072	1779670	552	10p15.3	ADARB2	0	0	0	S3(2.7)	0
chr6	128289923	128841870	552	6q22.33	PTPRK	4.036	1	578	S2(4.1)	0
chr2	187867946	188419390	551	2q32.1	AC007319.1	0.002	0	0	S3(3.2)	0
chr9	126141932	126692431	550	9q33.3	DENND1A	1.295	1	559	S2(4.1)	0
chr6	21665002	22214734	550	6p22.3	CASC15	0.014	0.528	290	S3(3)	0
chr3	183852825	184402546	550	3q27.1	EIF2B5	0.515	0.336	82	S1(4.9)	0
chr4	7194264	7744554	550	4p16.1	SORCS2	0.005	0	0	S2(3.9)	0
chr7	31790792	32338941	548	7p14.3	PDE1C	2.788	0.585	529	S2(4.4)	0
chrX	11136238	11683821	548	Xp22.2	ARHGAP6	0.041	0.539	295	S2(3.7)	0
chr22	32908538	33454358	546	22q12.3	SYN3	0.001	0	0	S1(4.9)	0
chr21	22370632	22915650	545	21q21.1	NCAM2	0.13	1	555	S4(1.7)	0
chr4	150273168	150817385	544	4q31.23	RP11-526A4.1	0.009	0	0	S3(3.4)	0
chr15	58245621	58790065	544	15q21.3	ALDH1A2	0.01	0.24	104	S2(4.4)	0
chr11	92085261	92629618	544	11q14.3	FAT3	0	0	0	S4(2.3)	0
chr7	32535037	33078516	543	7p14.3	AVL9	0.439	0.724	290	S1(4.8)	0
chr14	89878655	90421003	542	14q32.11	RP11-33N16.3	0.278	0.701	487	S2(4.1)	0
chr2	1792884	2335032	542	2p25.3	MYT1L	0.001	0	0	S3(2.6)	0
chr3	68053358	68594776	541	3p14.1	FAM19A1	0.002	0.007	4	S4(1.7)	0
chr8	99413630	99955055	541	8q22.2	STK3	0.711	1	559	S1(5.2)	0
chr11	30851915	31391357	539	11p13-14	DCDC1	0	0	0	S4(1.6)	0
chr14	34393436	34931980	539	14q13.1	EGLN3	0.059	0.081	44	S2(3.6)	0
chr7	83585092	84122040	537	7q21.11	SEMA3A	1.648	1	555	S2(4.4)	0
chr2	45878483	46415129	537	2p21	PRKCE	0.61	1	546	S1(5)	0
chr18	24235705	24770662	535	18q11.2	AQP4-AS1	0	0	0	S4(1.8)	0
chr18	39739246	40271387	532	18q12.3	LINC00907	0.009	0.305	162	S4(1.8)	0
chr17	49707673	50237377	530	17q21-22	CA10	0	0	0	S4(1.6)	0
chr1	41972035	42501596	530	1p34.2	HIVEP3	0.242	1	532	S1(4.7)	0
chr1	239549864	240078750	529	1q43	CHRM3	0	0	0	S3(3)	0
chr17	77085426	77613550	528	17q25.3	RBFOX3	0	0	0	S2(3.8)	0
chr4	86396266	86923823	528	4q21.23-3	ARHGAP24	0.713	1	644	S2(4.3)	0.093	1		1
chr7	28338939	28865511	527	7p14-15	CREB5	0.014	0.268	144	S3(3.1)	0
chr7	34386123	34911194	525	7p14.3	NPSR1-AS1	0.001	0.008	4	S3(2.7)	0
chr7	131808090	132333447	525	7q32.3	PLXNA4	0	0	0	S3(2.7)	0
chr9	3824126	4348392	524	9p24.2	GLIS3	0.917	0.918	502	S1(4.7)	0
chr5	107194735	107717799	523	5q21.3	FBXL17	0.579	1	527	S3(2.6)	0
chr20	51588945	52111869	523	20q13.2	TSHZ2	0	0	0	S3(2.9)	0
chr1	50905149	51425935	521	1p32.3	FAF1	0.883	1	558	S2(3.8)	0
chr1	14925199	15444539	519	1p36.21	KAZN	0.263	0.343	178	S3(2.8)	0
chr7	103112230	103629963	518	7q22.1	RELN	0	0	0	S2(3.8)	0
chr14	53635771	54153976	518	14q22.1-2	AL163953.3	0.009	0.191	93	S2(4.1)	0
chr3	120626918	121143608	517	3q13.33	STXBP5L	0.041	0.997	527	S3(2.6)	0
chr12	117890816	118406788	516	12q24.22-23	KSR2	0.006	0.06	31	S3(2.9)	0
chr6	152442818	152958936	516	6q25.1-2	SYNE1	0.516	1	542	S3(3)	0
chr11	9800213	10315754	516	11p15.4	SBF2	1.175	1	535	S1(5.3)	0
chr2	109745803	110262207	516	2q12-13	SH3RF3	0.308	1	523	S1(5.2)	0
chr6	72596405	73112845	516	6q13	RIMS1	0.02	0.742	207	S2(3.9)	0
chr7	39017597	39532694	515	7p14.1	POU6F2	0	0.006	3	S2(3.6)	0
chr2	145425533	145940216	515	2q22.3	TEX41	0.007	0.223	115	S2(3.7)	0
chr2	40324409	40838193	514	2p22.1	SLC8A1	1.612	0.701	369	S2(4.3)	0
chr18	72265105	72777627	513	18q22.3	ZNF407	0.777	1	526	S3(3)	0
chr6	5261276	5771813	511	6p25.1	FARS2	0.729	1	563	S3(2.6)	0
chr5	9035137	9546187	511	5p15.31	SEMA5A	2.256	1	526	S1(4.7)	0
chr20	19193289	19703581	510	20p11.23	SLC24A3	0.003	0	0	S2(3.6)	0
chr7	76139744	76648340	509	7q11.23	UPK3B	0.034	0.489	389	S1(4.6)	0
chr9	15552894	16061661	509	9p22.3	CCDC171	0.047	0.939	478	S2(4)	0
chr17	64298753	64806861	508	17q24.2	PRKCA	3.621	1	524	S1(4.8)	0
chr4	97231851	97740015	508	4q22.3	RP11-145G20.1	0	0	0	G2(1.4)	0
chr12	1099674	1605099	505	12p13.33	ERC1	0.998	1	540	S1(5.3)	0.492	2		2
chr8	97657454	98161882	504	8q22.1	CPQ	0.539	1	559	S2(4.2)	0
chr18	30517365	31021065	504	18q12.1	CCDC178	0	0	0	G2(1.4)	0
chr1	225083963	225586996	503	1q42.12	DNAH14	0.042	0.557	280	S2(3.7)	0
chr14	32798478	33300567	502	14q12-13	AKAP6	0.845	1	705	S2(4.1)	0
chr6	114290864	114792869	502	6q21-22	RP3-399L15.3	0.029	0.315	158	S3(2.7)	0
chr12	81652044	82153332	501	12q21.31	PPFIA2	0	0	0	S4(1.7)	0
chr3	155755489	156256545	501	3q25.31	KCNAB1	0	0	0	S2(4.1)	0
chr4	167654534	168155947	501	4q32.3	SPOCK3	0	0	0	S4(1.6)	0
chrX	147582138	148082193	500	Xq28	AFF2	0	0	0	S4(1.6)	0
chr13	60239716	60738121	498	13q21.2	DIAPH3	1.523	1	518	S3(3.1)	0
chr6	166822851	167319939	497	6q27	RPS6KA2	0.295	0.608	225	S3(2.5)	0
chr6	56322784	56819426	497	6p12.1	DST	4.419	1	522	S1(5)	0.416	1		1
chr7	136370305	136866854	497	7q33	hsa-mir-490	0.003	0	0	S3(3.2)	0
chr2	148778579	149275805	497	2q23.1	MBD5	0.866	1	520	S4(2.1)	0.213	1		1
chr7	81575759	82073114	497	7q21.11	CACNA2D1	0.626	1	531	S2(3.5)	0
chr4	84717588	85214565	497	4q21.23	RP11-8L2.1	0.001	0.008	4	S3(2.8)	0
chr12	26490341	26986131	496	12p11-12	ITPR2	0.507	1	498	S2(4.4)	0
chr5	145967935	146464347	496	5q32	PPP2R2B	0	0	0	S4(2.2)	0
chr5	127873705	128369335	496	5q23.3	SLC27A6	0	0.006	3	S3(3.3)	0
chr2	209224437	209719227	495	2q34	PTH2R	0.003	0.018	103	S4(1.8)	0
chr2	59465850	59960531	495	2p16.1	AC007131.2	0	0	0	S4(1.5)	0
chr14	89591214	90085493	494	14q31-32	FOXN3	0.688	0.983	487	S2(3.8)	0
chr5	92953774	93447404	494	5q15	FAM172A	0.535	1	504	S3(3.4)	0
chr14	37147635	37642071	494	14q13.3	SLC25A21	0.016	0.309	153	S3(2.7)	0
chr4	53739148	54232242	493	4q12	SCFD2	0.75	1	593	S2(4.1)	0
chr4	109731876	110223813	492	4q25	COL25A1	0.001	0	0	S3(2.8)	0
chr8	52232137	52722005	490	8q11.22-23	PXDNL	0.015	0.062	32	S4(2.3)	0
chr8	69242956	69731257	488	8q13.2	C8orf34	0.006	0.122	79	S2(3.6)	0
chr8	94225530	94712661	487	8q22.1	LINC00535	0.003	0.048	39	S3(3.2)	0
chr4	78978723	79465423	487	4q21.21	FRAS1	0.015	0.532	210	S2(4.2)	0
chr3	24729409	25215796	486	3p24.2	AC133680.1	0	0	0	S4(2.4)	0
chr10	12391480	12877545	486	10p13	CAMK1D	0.032	1	490	S3(2.8)	0
chr8	106330919	106816760	486	8q23.1	ZFPM2	0.001	0	0	S4(2.1)	0
chr19	30719196	31204445	485	19q12	ZNF536	0.001	0	0	S4(2.2)	0
chr2	178487979	178973066	485	2q31.2	PDE11A	0.144	0.929	455	S3(3.2)	0
chr4	101316497	101801283	485	4q24	EMCN	0	0	0	S2(3.6)	0
chr2	18059113	18542882	484	2p24.2	KCNS3	0.056	0.248	120	S3(3.3)	0
chr14	80943329	81425861	483	14q31.1	CEP128	0.373	0.964	554	S3(3.3)	0
chr8	107282472	107764922	482	8q23.1	OXR1	0.192	1	512	S3(3.2)	0
chr18	33877676	34360018	482	18q12.2	FHOD3	0.236	1	507	S1(4.7)	0.03	1		1
chr18	10666479	11148587	482	18p11.21-22	PIEZO2	0	0	0	S3(2.7)	0
chr9	37588409	38068684	480	9p13.2	RP11-613M10.9	1.016	0.673	322	S1(4.7)	0
chr7	111366165	111846466	480	7q31.1	DOCK4	0.112	1	493	S3(2.8)	0
chr13	29598747	30077892	479	13q12.3	MTUS2	0	0	0	S2(3.8)	0
chr3	82035288	82512826	478	3p12.2	RP11-260O18.1	0	0	0	S4(1.6)	0
chr11	120382467	120859613	477	11q23.3	GRIK4	0.001	0	175	S3(2.6)	0
chr2	171034654	171511681	477	2q31.1	MYO3B	0	0	0	S3(2.8)	0
chr7	33168855	33645680	477	7p14.3	BBS9	0.263	1	616	S2(4)	0
chr7	119913721	120390385	477	7q31.31	KCND2	0	0	0	S4(1.8)	0
chr3	62384021	62861054	477	3p14.2	CADPS	0	0	0	S2(3.6)	0
chr7	48211054	48687092	476	7p12.3	ABCA13	0.015	0.466	222	S3(2.6)	0
chr12	125671381	126146917	476	12q24.31-32	TMEM132B	0.005	0	0	S3(2.8)	0
chr8	48173166	48648868	476	8q11.21	SPIDR	0.588	0.968	461	S2(3.8)	0
chr11	26210828	26684835	474	11p14.2	ANO3	0	0	0	S3(2.7)	0
chr12	22852792	23327057	474	12p12.1	RP11-114G22.1	0.005	0.044	101	S4(1.9)	0
chr10	20105167	20578785	474	10p12.31	PLXDC2	0	0	0	S4(1.5)	0
chr3	18486515	18959184	473	3p24.3	AC144521.1	0.003	0.008	4	S4(1.6)	0
chr6	151977825	152450754	473	6q25.1	ESR1	0.003	0	0	S3(3.1)	0
chr2	218148741	218621316	473	2q35	DIRC3	0.062	0.744	241	S1(4.6)	0
chr6	51480097	51952423	472	6p12.2-3	PKHD1	0	0	0	S4(2)	0
chr6	38136226	38607924	472	6p21.2	BTBD9	0.494	1	486	S1(4.8)	0
chr9	78505559	78977255	472	9q21.13	PCSK5	0.001	0	0	S3(2.9)	0
chr5	31639516	32111037	472	5p13.3	PDZD2	0.003	0	0	S2(3.7)	0
chr1	59762309	60233347	471	1p32.1	FGGY	0.29	1	477	S2(4.3)	0
chr18	42792959	43263072	470	18q12.3	SLC14A2	0.002	0	0	S2(4.3)	0
chr2	40013592	40482349	469	2p22.1	SLC8A1-AS1	0.045	0.663	219	S1(5)	0
chr7	101458958	101927249	468	7q22.1	CUX1	0.948	0.999	469	S2(4.3)	0
chr5	112357795	112824527	467	5q22.2	MCC	0.048	1	471	S2(4.2)	0
chr2	163227916	163695240	467	2q24.2	KCNH7	0	0	0	S3(2.5)	0
chr5	93488670	93954309	466	5q15	KIAA0825	0.079	1	481	S3(3.1)	0
chr7	137065782	137531838	466	7q33	DGKI	0.676	1	493	S1(4.6)	0
chr1	8412456	8877702	465	1p36.23	RERE	0.789	1	483	S1(5.4)	0
chr6	16299342	16761722	462	6p22.3	ATXN1	2.605	1	485	S1(4.9)	0
chrX	123094061	123556514	462	Xq25	STAG2	0.416	0.35	162	S2(3.7)	0
chr7	11409983	11871824	462	7p21.3	THSD7A	0	0	0	S4(1.6)	0
chr18	5954704	6415236	461	18p11.31	L3MBTL4	0	0	0	S4(1.9)	0
chr3	146627471	147088443	461	3q24	RP11-649A16.1	0.006	0.13	98	S3(3.1)	0
chr1	240177647	240638489	461	1q43	FMN2	4.685	0.842	419	S1(4.9)	0
chr9	16409500	16870841	461	9p22.2-3	BNC2	1.627	1	515	S1(4.7)	0
chr8	15965386	16424999	460	8p22	MSR1	0.001	0	0	S4(2.1)	0
chr5	142149948	142608576	459	5q31.3	ARHGAP26	0.182	1	477	S1(5.1)	0
chr12	66741210	67197966	457	12q14.3	GRIP1	0.007	0	0	S3(3.3)	0
chr1	185703682	186160085	456	1q25-31	HMCN1	0.112	1	463	S2(4.1)	0
chr9	6720862	7175648	455	9p24.1	KDM4C	0.62	0.922	446	S3(3.1)	0
chr8	137543040	137997178	454	8q24.23	RP11-30J20.1	0	0	0	S4(1.8)	0
chr4	19457058	19911315	454	4p15.31	RP11-608O21.1	0	0	0	S2(4.1)	0
chr15	62682724	63136830	454	15q22.2	TLN2	0.636	1	469	S1(5)	0
chr2	33172038	33624576	453	2p22.3	LTBP1	0.15	1	467	S1(5.2)	0
chr7	43152197	43605600	453	7p13-14	HECW1	0.49	0.999	470	S2(4.4)	0
chr3	39850404	40301812	451	3p22.1	MYRIP	0.003	0	0	S2(4)	0
chr1	210856554	211307457	451	1q32.2	KCNH1	0.037	1	461	S3(3.1)	0
chr15	29412456	29862927	450	15q13.1	FAM189A1	0.018	0.02	5	S3(3.2)	0
chrX	132669772	133119922	450	Xq26.2	GPC3	0	0	0	S4(1.9)	0
chr5	109624933	110074657	450	5q22.1	TMEM232	0.006	0.118	54	S4(2)	0
chr4	5053168	5502725	450	4p16.2	STK32B	0.01	0	0	S2(3.6)	0
chr5	108083522	108532542	449	5q21.3	FER	1.25	1	456	S3(3.4)	0
chr2	28112807	28561768	449	2p23.2	BRE	0.559	1	582	S1(5.2)	0
chr18	67068290	67516323	448	18q22.2	DOK6	0.003	0	0	S3(2.7)	0
chr13	74260225	74708394	448	13q22.1	KLF12	0.005	0	0	S3(3.4)	0
chr12	83080658	83528649	448	12q21.31	TMTC2	0.088	1	454	S4(1.8)	0
chr3	164924747	165373211	448	3q26.1	RP11-85M11.2	0	0	0	G2(1.3)	0
chr12	28286181	28732883	447	12p11.22	CCDC91	0.54	0.874	408	S3(3.4)	0
chr17	70642087	71088851	447	17q24-25	SLC39A11	0.632	1	467	S2(4)	0
chrX	42111711	42558636	447	Xp11.3-4	RP1-154K9.2	0	0	0	S4(2)	0
chr16	25703346	26149009	446	16p12.1	HS3ST4	0	0	0	S4(1.9)	0
chr14	38065051	38510647	446	14q21.1	TTC6	0.003	0.008	35	S3(3.4)	0
chr5	169064250	169510386	446	5q35.1	DOCK2	0.039	1	456	S1(4.8)	0
chr8	61969716	62414204	444	8q12.2-3	CLVS1	0.001	0.009	4	S3(2.6)	0
chr5	83236372	83680611	444	5q14.3	EDIL3	0	0	0	G2(1.4)	0
chr21	32490733	32932290	442	21q22.11	TIAM1	0.002	0	0	S4(2.1)	0
chr1	242246287	242687998	442	1q43	PLD5	0	0	0	S4(2.4)	0
chr18	52889561	53332018	442	18q21.2	TCF4	2.697	0.834	374	S2(4)	0
chr3	170136652	170578169	442	3q26.2	CLDN11	0.01	0.068	26	S1(5.3)	0
chr4	82523950	82965397	441	4q21.22	RP11-689K5.3	0.001	0	0	S4(2.2)	0
chr13	100741268	101182686	441	13q32.3	PCCA	0.9	1	464	S3(2.9)	0
chr12	128751947	129192460	441	12q24.32	TMEM132C	0	0	0	S4(1.5)	0
chr8	56014948	56454613	440	8q12.1	XKR4	0	0	0	S4(2)	0
chr7	127292233	127732661	440	7q32.1	SND1	2.467	1	464	S2(4)	0
chr2	213446080	213886269	440	2q34	AC079610.1	0.039	0.222	229	S2(3.6)	0
chr3	157823643	158263519	440	3q25.32	RSRC1	0.449	0.994	462	S2(3.5)	0
chr12	13693164	14133053	440	12p13.1	GRIN2B	0	0	0	S4(2.4)	0
chr5	15500304	15939900	440	5p15.1	FBXL7	1.539	1	506	S3(3.2)	0
chr20	58662894	59102516	440	20q13.33	RP5-1043L13.1	0.001	0	0	S3(2.7)	0
chr20	50827183	51266970	440	20q13.2	RP4-723E3.1	0.011	0.3	132	S4(2.4)	0
chr5	170288873	170727019	438	5q35.1	RANBP17	0.432	1	446	S3(3.1)	0
chrX	10413349	10851773	438	Xp22.2	MID1	0.383	0.9	496	S1(4.5)	0
chr8	102698770	103137135	438	8q22.3	NCALD	0.083	1	441	S3(3.1)	0
chr21	30566391	31003071	437	21q21.3	BACH1	1.096	0.847	389	S1(4.6)	0
chr5	45259348	45696253	437	5p12	HCN1	0	0	0	S4(1.6)	0
chr4	140637906	141075338	437	4q31.1	MAML3	0.166	1	453	S2(4.1)	0
chr5	91378413	91815133	437	5q14.3	RP11-348J24.2	0.003	0	0	S3(3)	0
chr9	18473891	18910948	437	9p22.1-2	ADAMTSL1	1.295	1	450	S2(4.3)	0
chr18	13217496	13652754	435	18p11.21	LDLRAD4	0.004	0	0	S4(2.4)	0
chr2	215114763	215548970	434	2q34-35	AC107218.3	0.01	0.234	232	S4(2.2)	0
chr5	7396320	7830194	434	5p15.31	ADCY2	0	0	0	S4(1.9)	0
chr8	33462373	33896526	434	8p12	RP11-317N12.1	0	0	0	S4(2.2)	0
chr6	157099062	157531913	433	6q25.3	ARID1B	1.648	1	461	S2(3.7)	0
chr4	46995739	47428461	433	4p12	GABRB1	0	0	0	S3(2.6)	0
chr8	119201697	119634234	433	8q24.12	SAMD12	1.164	1	482	S1(5.3)	0
chr8	12940869	13373167	432	8p22	DLC1	1.909	1	443	S1(4.9)	0
chr4	169418216	169849608	431	4q32.3	PALLD	0.398	0.689	306	S1(5.4)	0
chr5	164776035	165205694	430	5q34	CTC-535M15.2	0	0	0	G2(1.3)	0
chr15	33057746	33486897	429	15q13.3	FMN1	0.687	0.857	374	S1(5.4)	0
chr17	55333211	55762046	429	17q22	MSI2	1.273	0.999	458	S2(4)	0
chr13	72012097	72441330	429	13q21.33	DACH1	0	0	0	G2(1.4)	0
chr2	43393799	43823185	429	2p21	THADA	0.704	0.995	368	S1(5.2)	0
chr1	175284329	175712906	429	1q25.1	TNR	0	0	0	S4(2.1)	0
chr1	86194915	86622626	428	1p22.3	COL24A1	0.092	1	449	S2(4.1)	0
chr10	25463990	25891155	427	10p12.1	GPR158	0	0	0	S3(2.6)	0
chr5	53179774	53606412	427	5q11.2	ARL15	0.502	1	431	S2(4.2)	0
chr5	66675205	67101066	426	5q12-13	RP11-434D9.1	0.002	0	0	S3(3.2)	0
chr4	30722036	31148422	426	4p15.1	PCDH7	0	0	0	S4(1.5)	0
chr6	155153830	155578857	425	6q25.2-3	TIAM2	1.02	1	536	S1(5.2)	0
chr5	162439270	162864332	425	5q34	RP11-541P9.3	0.004	0.042	42	S4(1.8)	0
chr2	946553	1371385	425	2p25.3	SNTG2	0.11	0.986	420	S4(2.3)	0
chr16	9852375	10276611	424	16p13.2	GRIN2A	0	0	0	S3(3)	0
chr3	25215822	25639423	424	3p24.2	RARB	0.007	0.337	145	S3(3)	0
chr16	70841280	71264625	423	16q22.2	HYDIN	0.006	0.064	27	S2(3.5)	0
chrX	68835910	69259319	423	Xq13.1	EDA	0.002	0	0	S4(2.2)	0
chr4	15006565	15429538	423	4p15.32-33	RP11-665G4.1	0.02	0.312	144	S2(3.8)	0
chr12	23682439	24103966	422	12p12.1	SOX5	0	0	0	S4(1.5)	0
chr17	78518618	78940171	422	17q25.3	RPTOR	1.527	1	427	S1(4.9)	0
chr1	62208148	62629592	421	1p31.3	INADL	0.255	1	429	S3(3.2)	0
chr11	101322294	101743293	421	11q22.1	TRPC6	0	0	0	S2(3.6)	0
chr6	123537482	123958238	421	6q22.31	TRDN	0	0	0	G2(1.4)	0
chr14	71787165	72207946	421	14q24.2	SIPA1L1	2.75	1	435	S1(4.6)	0
chr12	75956981	76377795	421	12q21.2	RP11-114H23.1	0.011	0.202	85	S1(5.4)	0
chr9	101050390	101471479	421	9q22.33	GABBR2	0.002	0	0	S1(4.7)	0
chr2	229715241	230136001	421	2q36.3	PID1	0.117	0.667	282	S2(3.6)	0
chr2	180306708	180726232	420	2q31.2-3	ZNF385B	0.015	0.665	273	S3(3)	0
chr3	31699381	32119072	420	3p22-23	OSBPL10	0.245	0.772	359	S3(2.9)	0
chr1	234040678	234460262	420	1q42.2	SLC35F3	0.003	0	0	S3(3.2)	0
chr10	73156690	73575702	419	10q22.1	CDH23	0.001	0.01	4	S2(4.2)	0
chr16	53737874	54155853	418	16q12.2	FTO	0.94	1	437	S3(2.8)	0
chr18	46570038	46987717	418	18q21.1	DYM	0.732	1	437	S1(4.9)	0
chr4	14472088	14889793	418	4p15.33	LINC00504	0	0	0	S4(2.2)	0
chr14	58030639	58448912	418	14q22-23	SLC35F4	0.001	0	0	S3(2.6)	0
chr17	61086916	61505060	418	17q23.2-3	TANC2	4.898	1	489	S1(4.8)	0
chr19	13317255	13734804	418	19p13.2	CACNA1A	0.205	0.721	303	S1(4.8)	0
chr7	1855428	2272878	417	7p22.3	MAD1L1	0.477	1	431	S2(4.4)	0
chr5	132532146	132948255	416	5q31.1	FSTL4	0	0	0	S3(3.3)	0
chr4	137717876	138133953	416	4q28.3	RP11-138I17.1	0.003	0	0	S3(2.5)	0
chr3	136055076	136471220	416	3q22.3	STAG1	1.583	1	428	S1(4.6)	0
chr10	320129	735683	416	10p15.3	DIP2C	1.602	1	479	S2(4.4)	0
chr1	231762560	232177018	414	1q42.2	DISC1	0.542	1	569	S3(3.3)	0
chr12	5641034	6055398	414	12p13.31	ANO2	0.001	0	0	S3(3.4)	0
chr5	4452042	4866334	414	5p15.32-33	RP11-445O3.2	0	0	0	G2(1.4)	0
chr12	44902057	45315631	414	12q12	NELL2	0	0	0	S4(2.3)	0
chr22	47158517	47571336	413	22q13.31	TBC1D22A	0.877	1	479	S2(4)	0
chr20	9049409	9461889	412	20p12.2-3	PLCB4	4.426	1	454	S2(3.9)	0
chr12	101111303	101522419	411	12q23.1	ANO4	0.748	1	426	S3(3.3)	0
chr2	44589088	44999731	411	2p21	CAMKMT	0.157	1	433	S2(3.6)	0
chr6	118228688	118638839	410	6q22.1-31	SLC35F1	0.001	0	0	S3(2.9)	0
chr6	146348781	146758734	410	6q24.3	GRM1	0.001	0	0	S4(2.3)	0
chr8	89339064	89749363	410	8q21.3	RP11-586K2.1	0.038	0.964	396	S3(2.7)	0
chr1	75667815	76076801	409	1p31.1	SLC44A5	0.002	0	0	S4(1.9)	0
chr7	82383328	82792246	409	7q21.11	PCLO	0.004	0.056	23	S3(2.7)	0
chr1	71547006	71955652	409	1p31.1	ZRANB2-AS2	0.027	0.601	247	S3(2.7)	0
chrX	41374186	41782716	409	Xp11.4	CASK	0.341	1	422	S2(3.7)	0
chr16	80188949	80597032	408	16q23.2	RP11-525K10.3	0.007	0.092	29	S3(3.4)	0
chr13	70274725	70682591	408	13q21.33	KLHL1	0	0	0	G2(1.4)	0
chr1	64239692	64647181	407	1p31.3	ROR1	0.059	1	418	S1(4.6)	0
chr4	40812043	41218731	407	4p13-14	APBB2	1.543	0.997	413	S1(4.6)	0
chr7	140774031	141180180	406	7q34	TMEM178B	0.01	0	0	S4(2.4)	0
chr1	39546987	39952849	406	1p34.3	MACF1	1.742	1	411	S1(5.2)	0
chr5	128836053	129241610	406	5q23.3	CTC-575N7.1	0	0	0	S4(1.8)	0
chr3	34200825	34604369	404	3p22.3	AC018359.1	0	0	0	S4(2.1)	0
chr3	106555657	106959488	404	3q13.12	LINC00882	0.028	1	543	S2(3.6)	0
chr5	158122927	158526769	404	5q33.3	EBF1	0.002	0	0	S3(3.4)	0
chr11	2465913	2870339	404	11p15.4-5	KCNQ1	0.002	0.035	14	S2(4.1)	0
chr18	34409068	34812135	403	18q12.2	KIAA1328	0.217	1	415	S3(3.4)	1	1		1
chr21	30909253	31312351	403	21q21.3	GRIK1	0	0	0	S3(3.1)	0
chr17	54188318	54589020	401	17q22	ANKFN1	0.003	0	0	S3(3.4)	0
chr8	73449625	73850584	401	8q13.3	KCNB2	0	0	0	S4(2.1)	0
chr12	18400547	18801348	401	12p12.3	PIK3C2G	0	0	0	S3(3)	0
chr5	127593600	127994878	401	5q23.3	FBN2	0	0	0	S2(3.8)	0
chr10	18429605	18830798	401	10p12.31-33	CACNB2	0	0	0	S3(2.5)	0
chr8	116420723	116821899	401	8q23.3	TRPS1	0.939	0.653	292	S3(3.2)	0
chr4	95679118	96079599	400	4q22.3	BMPR1B	0.001	0	0	S3(3.4)	0
chr8	687650	1087777	400	8p23.3	ERICH1-AS1	0	0	0	S4(2.1)	0
chr3	170779127	171178197	399	3q26.2-31	TNIK	0.469	1	414	S1(4.9)	0
chr18	32073253	32471808	399	18q12.1	DTNA	0.016	0.46	185	S3(3.1)	0
chr2	197059093	197458416	399	2q32-33	HECW2	1.382	1	417	S1(4.9)	0
chr7	106012696	106410653	398	7q22.3	CTB-111H14.1	0.57	0.995	376	S1(5)	0
chr4	16503163	16900432	397	4p15.32	LDB2	1.08	1	464	S2(3.9)	0
chr4	123844228	124240605	396	4q28.1	SPATA5	0.71	1	407	S2(4.3)	0
chr15	26788692	27184686	396	15q12	GABRB3	0	0.008	3	S4(1.7)	0
chr6	39297765	39693181	395	6p21.2	KIF6	0.011	0.243	96	S3(3.1)	0
chr1	181382237	181777219	395	1q25.3	CACNA1E	0	0	0	S3(2.7)	0
chr2	144695634	145090135	395	2q22.3	GTDC1	0.294	1	406	S2(3.5)	0
chr14	63173286	63568755	395	14q23.2	KCNH5	0	0	0	S4(2.3)	0
chr10	21068901	21463116	394	10p12.31	NEBL	0	0	0	S3(2.6)	0
chr1	108113781	108507766	394	1p13.3	VAV3	0	0	0	S4(2.3)	0
chr2	15307031	15701454	394	2p24.3	NBAS	0.943	1	518	S4(2)	0
chr2	135894485	136288806	394	2q21.3	ZRANB3	0.169	0.959	379	S2(3.5)	0
chr13	42140972	42535256	394	13q14.11	VWA8	0.532	1	405	S1(4.9)	0
chr11	5274419	5667019	393	11p15.4	HBG2	0.02	0.35	117	S3(3.1)	0
chr9	112542768	112934792	392	9q31.3	AKAP2	2.404	1	484	S1(5.4)	0
chr9	112542588	112934792	392	9q31.3	PALM2-AKAP2	2.404	1	484	S1(5.4)	0
chr7	29161889	29553944	392	7p14.3	CHN2	0	0	0	S3(2.7)	0
chr8	131064352	131455906	392	8q24.21	ASAP1	6.152	1	432	S1(5.1)	0
chrX	67262185	67653755	392	Xq12	OPHN1	0.476	1	420	S2(3.6)	0
chr6	133823389	134213074	390	6q23.2	RP3-323P13.2	0	0	0	S2(3.7)	0
chr16	61681145	62070939	390	16q21	CDH8	0	0	0	G2(1.4)	0
chr11	117298488	117688240	390	11q23.3	DSCAML1	0	0	0	S2(3.6)	0
chr3	63213990	63602597	389	3p14.2	SYNPR	0	0	0	S3(2.9)	0
chr14	44464983	44853748	389	14q21.2	RP11-305B6.3	0.001	0.008	3	S4(1.5)	0
chr7	94536513	94925727	389	7q21.3	PPP1R9A	0	0	0	S3(2.7)	0
chr3	23244510	23633284	389	3p24.3	UBE2E2	0.734	1	449	S2(4.2)	0
chrX	5758677	6146904	388	Xp22.31-32	NLGN4X	0	0	0	S4(1.7)	0
chr15	31775328	32162992	388	15q13.3	OTUD7A	0.01	0.17	66	S3(2.8)	0
chr18	42260137	42648475	388	18q12.3	SETBP1	0.103	1	392	S2(3.8)	0
chr5	14143810	14532235	388	5p15.2	TRIO	7.434	1	401	S1(5)	0
chr3	19189945	19577138	387	3p24.3	KCNH8	0.001	0	0	S4(1.5)	0
chr7	130794854	131181395	387	7q32.3	MKLN1	0.919	1	416	S1(5.4)	0
chr4	96083654	96470357	387	4q22.3	UNC5C	0	0	0	S4(1.6)	0
chr9	94325372	94712444	387	9q22.31	ROR2	0.001	0.01	4	S2(4)	0
chr15	84322837	84708594	386	15q25.2	ADAMTSL3	0	0	0	S4(2.2)	0
chr12	96883348	97269333	386	12q23.1	C12orf55	0.003	0.008	4	S1(4.8)	0
chr1	178062863	178448644	386	1q25.2	RASAL2	1.766	1	392	S1(5)	0
chr2	111490149	111875799	386	2q13	ACOXL	0	0	0	S2(4.2)	0
chr2	35024916	35410755	386	2p22.3	AC012593.1	0	0	0	S4(1.6)	0
chr12	41582249	41968392	386	12q12	PDZRN4	0	0	0	S4(1.8)	0
chr17	30819539	31204195	385	17q11.2	MYO1D	0.41	1	391	S2(4.3)	0
chr4	72053002	72437804	385	4q13.3	SLC4A4	1.137	1	440	S2(3.9)	0
chr4	89647105	90032549	385	4q22.1	FAM13A	0.363	0.862	360	S2(4.3)	0
chr16	23847321	24231932	385	16p12.1-2	PRKCB	0	0	0	S3(2.7)	0
chr3	10365706	10749716	384	3p25.3	ATP2B2	0	0	0	S2(4)	0
chr7	144149033	144533488	384	7q35	TPK1	0.004	0.013	6	G2(1.4)	0
chr18	45553043	45937123	384	18q21.1	ZBTB7C	0.001	0	0	S2(3.8)	0
chr2	232825954	233209060	383	2q37.1	DIS3L2	0.743	1	391	S2(4)	0
chr2	183004762	183387919	383	2q32.1	PDE1A	0.049	0.751	295	S2(3.8)	0
chr1	196194908	196578355	383	1q31.3	KCNT2	0	0	0	S4(2.4)	0
chr5	169780490	170163636	383	5q35.1	KCNIP1	0	0	0	S3(2.5)	0
chr18	65183782	65566856	383	18q22.1	RP11-638L3.1	0.07	1	387	S2(3.9)	0
chr12	78224684	78606790	382	12q21.2	NAV3	3.207	1	437	S2(3.5)	0
chr3	9022274	9404737	382	3p25.3	SRGAP3	0.029	0.942	276	S2(4.4)	0
chr1	176432306	176814735	382	1q25.2	PAPPA2	0.001	0	0	S4(1.9)	0
chr15	88418229	88799999	382	15q25.3	NTRK3	0	0	0	S4(2.3)	0
chr15	57210820	57591479	381	15q21.3	TCF12	2.131	1	387	S1(4.5)	0
chr4	21950637	22331953	381	4p15.2	RP11-17E2.2	0	0	0	S3(2.5)	0
chr3	101818087	102198685	381	3q12.3	ZPLD1	0.002	0	0	S2(4.3)	0
chr4	68566997	68946670	380	4q13.2	UBA6-AS1	0.07	0.631	237	S3(3.3)	0
chrX	69748789	70128581	380	Xq13.1	TEX11	0	0	0	S3(3.4)	0
chr12	41086243	41466220	380	12q12	CNTN1	0	0	0	S4(1.6)	0
chr18	54318573	54698828	380	18q21.31	WDR7	0.55	1	390	S3(3.3)	0
chr1	190066791	190446759	380	1q31.1	BRINP3	0	0	0	G2(1.4)	0
chr2	19167728	19546509	379	2p24.1-2	AC092594.1	0.134	1	390	S1(4.5)	0
chr3	24158650	24536773	378	3p24.2	THRB	0.001	0.019	4	S2(4.2)	0
chr3	188665002	189043093	378	3q28	TPRG1	0.024	0.517	824	S2(4.1)	0
chr3	3292370	3668980	377	3p26.2	AC026188.1	0.007	0.084	873	G2(1.4)	0
chr2	8147900	8523751	376	2p25.1	LINC00299	0.006	0.168	63	S3(2.9)	0
chr10	127700949	128077024	376	10q26.2	ADAM12	0.509	1	385	S2(4)	0
chr8	116962735	117337297	375	8q23.3	LINC00536	0.002	0	0	S2(3.7)	0
chr4	116843170	117218316	375	4q26	RP11-659O3.1	0.001	0.008	3	G2(1.4)	0
chr16	58767815	59142878	375	16q21	RP11-410D17.2	0.005	0.008	3	S3(3.2)	0
chr3	89156673	89531284	375	3p11.1	EPHA3	0	0	0	S4(1.7)	0
chr8	9911777	10286401	375	8p23.1	MSRA	0.537	1	381	S4(2.4)	0
chr14	93799564	94174222	375	14q32.12	UNC79	0.003	0.016	7	S3(2.8)	0
chr11	105028653	105402424	374	11q22.3	RP11-94P11.4	0	0	0	S3(2.9)	0
chr18	31431063	31804916	374	18q12.1	NOL4	0	0	0	G2(1.4)	0
chr4	128018045	128391724	374	4q28.1	RP11-125O18.1	0	0	0	S3(2.5)	0
chr5	37379313	37753537	374	5p13.2	WDR70	0.702	1	402	S1(4.9)	0
chr14	64319682	64693165	373	14q23.2	SYNE2	0.24	1	385	S2(4.3)	0
chr3	69219140	69591734	373	3p14.1	FRMD4B	0.001	0.013	5	S2(3.9)	0
chr3	111011565	111384597	373	3q13.13-2	CD96	0.003	0	0	S1(4.7)	0
chr20	13246708	13619587	373	20p12.1	TASP1	0.295	1	385	S3(3)	0
chr6	100956069	101329248	373	6q16.3	ASCC3	2.232	1	399	S2(4.2)	0
chr2	62900985	63273622	373	2p15	EHBP1	1.993	0.915	345	S2(4.2)	0
chr12	22216706	22589975	373	12p12.1	ST8SIA1	0.002	0.074	136	S4(2.3)	0
chr5	32925744	33298016	372	5p13.3	CTD-2066L21.3	0.011	0.277	103	S2(4.4)	0
chr18	40323191	40695657	372	18q12.3	RIT2	0	0	0	S4(1.5)	0
chr11	105480720	105852819	372	11q22.3	GRIA4	0.001	0	0	S3(2.6)	0
chr10	114206755	114578503	372	10q25.2	VTI1A	0.785	1	378	S2(4.1)	0
chr18	47349182	47721463	372	18q21.1	MYO5B	0	0	0	S3(2.8)	0
chr3	37493605	37865005	371	3p22.2	ITGA9	0.001	0	0	S2(4.2)	0
chr17	11501747	11873065	371	17p12	DNAH9	0	0	0	S4(2.2)	0
chr2	167744996	168116263	371	2q24.3	XIRP2	0.003	0	0	S3(2.8)	0
chr5	130761583	131132676	371	5q31.1	CTC-432M15.3	1.882	1	441	S2(3.8)	0
chr4	186506597	186877806	371	4q35.1	SORBS2	0.009	0.167	62	S4(2.2)	0
chr1	68297985	68668670	371	1p31.3	GNG12-AS1	0.07	0.948	353	S1(4.7)	0
chr14	31959161	32330430	371	14q12	NUBPL	0.227	0.811	385	S2(3.8)	0
chr16	49521434	49891830	370	16q12.1	ZNF423	0.001	0	0	S4(2.3)	0
chr4	176554084	176923815	370	4q34.2	GPM6A	0	0	0	S4(2.4)	0
chr1	21132962	21503377	370	1p36.12	EIF4G3	1.443	1	390	S1(5.2)	0
chr15	100511793	100882210	370	15q26.3	ADAMTS17	0.001	0	0	S4(2.4)	0
chr11	102980159	103350591	370	11q22.3	DYNC2H1	0.408	1	384	S1(4.7)	0
chr6	90636247	91006627	370	6q15	BACH2	0.004	0	0	S2(3.6)	0
chr3	155093368	155462856	369	3q25.31	PLCH1	0.003	0	0	S2(3.8)	0
chr15	85923801	86292586	369	15q25.3	AKAP13	2.928	1	383	S1(4.8)	0
chr16	17195625	17564738	369	16p12.3	XYLT1	1.652	1	377	S3(3.4)	0
chr1	2985731	3355185	369	1p36.32	PRDM16	0.003	0	0	S3(3.1)	0
chr9	17134979	17503921	369	9p22.2	CNTLN	0.539	1	406	S2(3.7)	0
chr5	33523639	33892297	369	5p13.2-3	ADAMTS12	0.548	1	373	S1(4.9)	0
chr11	95709761	96076344	367	11q21	MAML2	3.966	1	418	S1(5.2)	0
chr8	40388108	40755352	367	8p11.21	ZMAT4	0.001	0.011	4	S3(3.3)	0
chr8	139142265	139509065	367	8q24.23	FAM135B	0	0	0	S4(1.5)	0
chr4	20254882	20622184	367	4p15.31	SLIT2	3.079	1	409	S2(4)	0
chr4	148999912	149365850	366	4q31.23	NR3C2	0.006	0	0	S3(2.6)	0
chr21	19273579	19639690	366	21q21.1	CHODL	0.002	0	0	S4(1.8)	0
chr8	92555151	92919847	365	8q21.3	RP11-122C21.1	0	0	0	S3(3.2)	0
chr5	144851361	145214932	364	5q32	PRELID2	0.195	1	454	S3(3)	0
chr6	147163036	147525750	363	6q24.3	STXBP5-AS1	0.042	0.999	381	S2(4.1)	0
chr7	123672258	124035172	363	7q31.32-33	RP5-921G16.1	0	0	0	S4(1.8)	0
chr7	7680341	8043689	363	7p21.3	RPA3-AS1	0.439	1	474	S2(3.5)	0
chr7	106841999	107204959	363	7q22.3	COG5	0.695	1	371	S2(4.2)	0
chr14	61654276	62017694	363	14q23.1	PRKCH	0.001	0	0	S1(5.3)	0
chr13	101706129	102068843	363	13q33.1	NALCN	0.046	1	367	S2(3.8)	0
chr1	243651534	244014381	363	1q43-44	AKT3	1.815	1	365	S2(4.3)	0
chr7	15239942	15601640	362	7p21.2	AGMO	0	0	0	S4(2.2)	0
chr3	171757417	172119455	362	3q26.31	FNDC3B	3.101	1	400	S2(4.3)	0
chr4	107842958	108204963	362	4q25	DKK2	0.011	0.173	63	S3(2.9)	0
chr3	99536677	99897447	361	3q12.1	CMSS1	0.331	1	362	S1(5.1)	0
chrX	17393542	17754114	361	Xp22.13	NHS	0.265	1	363	S3(3)	0
chr11	28724161	29085368	361	11p14.1	RP11-115J23.1	0.008	0	0	S2(4.3)	0
chr22	48885271	49246724	361	22q13.32	FAM19A5	0.003	0.014	5	S4(2.2)	0
chr9	97488982	97849441	360	9q22.32	C9orf3	1.886	1	388	S1(5)	0
chr13	36345477	36705443	360	13q13.3	DCLK1	0	0	0	S2(4.1)	0
chr8	133133107	133493200	360	8q24.22	KCNQ3	0	0	0	S4(2.2)	0
chr15	66187416	66546085	359	15q22.31	MEGF11	0	0	0	S2(4.3)	0
chr3	132757234	133116636	359	3q22.1	TMEM108	0	0	0	S2(3.5)	0
chr7	21582832	21941457	359	7p15.3	DNAH11	0.005	0.142	62	S4(2.4)	0
chr18	1883524	2240847	357	18p11.32	RP11-161I6.2	0.003	0	0	S3(2.5)	0
chr2	230222344	230579274	357	2q36.3	DNER	0.001	0	0	S3(3.4)	0
chr18	55711598	56068772	357	18q21.31	NEDD4L	1.393	0.65	236	S1(5.3)	0
chr2	8062555	8418214	356	2p25.1	AC007464.1	0.007	0.177	63	S3(2.9)	0
chr9	87283465	87638505	355	9q21.33	NTRK2	0.002	0	0	S4(2.3)	0
chr8	19261671	19615540	354	8p21.3	CSGALNACT1	0.006	0	0	S2(4.1)	0
chrX	19552092	19905719	354	Xp22.12	SH3KBP1	0.657	1	370	S1(4.7)	0
chr14	37667117	38021566	354	14q13-21	MIPOL1	0.207	1	367	S3(2.8)	0
chr3	4535031	4889524	354	3p26.1	ITPR1	0.022	0.838	297	S3(3.3)	0
chr10	109517590	109871360	354	10q25.1	RP11-215N21.1	0.001	0	0	S4(1.6)	0
chr5	177664618	178017556	353	5q35.3	COL23A1	0.001	0	38	S3(2.8)	0
chr2	239969863	240323348	353	2q37.3	HDAC4	0.382	0.998	360	S2(4.2)	0
chr6	89319984	89673348	353	6q15	RNGTT	0.74	1	372	S4(2.2)	0
chr4	141780960	142134031	353	4q31.21	RNF150	1.393	0.778	283	S2(4)	0
chr3	64079542	64431152	352	3p14.1	PRICKLE2	0.637	0.498	188	S1(4.8)	0
chr15	94261770	94614049	352	15q26.1-2	CTD-3049M7.1	0	0	0	S4(2.3)	0
chr3	56761445	57113357	352	3p14.3	ARHGEF3	0.031	0.216	84	S2(4.1)	0
chr17	5675553	6027747	352	17p13.2	WSCD1	0	0	0	S3(3.3)	0
chr11	11292422	11643552	351	11p15.3	GALNT18	0.006	0.011	4	S3(3.3)	0
chr4	66185280	66536213	351	4q13.1	EPHA5	0.147	1	359	G2(1.4)	0
chr3	150803483	151154860	351	3q25.1	MED12L	0.005	0	0	S2(3.6)	0
chr12	40148822	40499891	351	12q12	SLC2A13	0.073	1	375	S4(1.9)	0
chr13	101360578	101711638	351	13q32-33	NALCN-AS1	0	0	0	S3(2.7)	0
chr3	138724647	139076065	351	3q23	MRPS22	0.226	0.218	91	S2(4)	0
chr8	53023398	53373519	350	8q11.23	ST18	0.001	0.011	4	S4(2.4)	0
chr7	27870191	28220362	350	7p15.1-2	JAZF1	2.265	1	379	S2(4.3)	0
chr4	120988112	121337921	350	4q27	RP11-679C8.2	0.055	0.819	288	S3(2.6)	0
chr8	15274723	15624158	349	8p22	TUSC3	0.406	0.652	262	S4(2)	0
chr10	57007514	57356993	349	10q21.1	RP11-168O22.1	0	0	0	G2(1.4)	0
chr12	24366189	24715524	349	12p12.1	RP11-444D3.1	0	0	0	S4(1.5)	0
chr1	210501595	210849638	348	1q32.2	HHAT	0.139	1	399	S2(4.3)	0
chr4	77356252	77704406	348	4q21.1	SHROOM3	1.164	0.462	176	S1(5.4)	0
chr8	91233715	91581546	348	8q21.3	LINC00534	0.001	0	0	S3(3.4)	0
chr5	138282408	138629246	347	5q31.2	SIL1	0.389	0.73	301	S1(4.9)	0
chr20	10002619	10349424	347	20p12.2	SNAP25-AS1	0.001	0.037	13	S2(4.3)	0
chr5	141704857	142051566	347	5q31.3	AC005592.2	0.141	1	380	G1(5.6)	0
chr12	10977558	11324212	347	12p13.2	PRR4	1.092	1	363	S3(3.1)	0
chr18	29704839	30050447	346	18q12.1	GAREM	0.006	0	0	S4(1.9)	0
chr1	74663946	75010112	346	1p31.1	TNNI3K	0.041	0.487	170	S4(1.6)	0
chr1	74663918	75009666	346	1p31.1	FPGT-TNNI3K	0.041	0.488	170	S4(1.6)	0
chr14	30421602	30766249	345	14q12	CTD-2251F13.1	0.004	0	0	S2(3.5)	0
chr2	220970376	221315499	345	2q35	AC114765.1	0.043	1	615	S2(3.5)	0
chr2	198669425	199014608	345	2q33.1	PLCL1:1	0.002	0	0	S3(2.5)	0
chr11	106544737	106889250	345	11q22.3	GUCY1A2	0.019	0.615	193	S3(2.7)	0
chr7	135777672	136122174	345	7q33	AC009784.3	0.001	0	0	S4(2.4)	0
chr8	141667998	142012315	344	8q24.3	PTK2	2.127	0.998	366	S1(5.4)	0
chr6	136172833	136516712	344	6q23.3	PDE7B	0.342	1	352	S2(3.6)	0
chr2	197831740	198175897	344	2q33.1	ANKRD44	0.193	1	346	S1(4.6)	0
chr1	164524820	164868533	344	1q23.3	PBX1	0.834	0.98	337	S2(3.5)	0
chr2	166813908	167158294	344	2q24.3	AC010127.3	0.002	0	0	S3(3.2)	0
chr15	28000020	28344504	344	15q12-13	OCA2	0.001	0	0	S4(2.3)	0
chr12	124457787	124800570	343	12q24.31	FAM101A	0.106	0.367	126	S2(4.4)	0
chr6	70576462	70919679	343	6q13	COL19A1	0	0	0	S4(2)	0
chr1	107682628	108026080	343	1p13.3	NTNG1	0.035	0.652	225	S4(2.2)	0
chr12	107712189	108053419	341	12q23.3	BTBD11	0.002	0	0	S4(2.4)	0
chr4	148653213	148993931	341	4q31.23	ARHGAP10	1.727	1	408	S1(4.7)	0
chr2	185463092	185804219	341	2q32.1	ZNF804A	0.002	0	0	S4(2)	0
chr5	117260702	117601730	341	5q23.1	CTD-3179P9.1	0	0	0	S4(2.1)	0
chr13	24553838	24895169	341	13q12.12	RP11-307N16.6	0.46	0.969	332	S1(4.8)	0
chr14	42832185	43172858	341	14q21.1	CTD-2307P3.1	0	0	0	S4(1.5)	0
chr6	25279305	25620758	341	6p22.2	LRRC16A	0.452	1	347	S3(2.9)	0
chr4	41361623	41702061	340	4p13	LIMCH1	1.362	1	347	S1(4.5)	0
chr10	32832296	33171802	340	10p11.22	C10orf68	0.087	1	456	S1(4.7)	0
chr18	66382445	66722426	340	18q22.1	CCDC102B	0.306	1	498	S3(3)	0
chr5	80708839	81047616	339	5q14.1	SSBP2	1.02	0.997	357	S2(4)	0
chr16	12995476	13334272	339	16p13.12	SHISA9	0	0	0	S4(2.4)	0
chr10	95753745	96092580	339	10q23.33	PLCE1	0.077	1	361	S1(4.7)	0
chr12	70297812	70637140	339	12q15	RP11-611E13.2	0.034	0.167	58	S3(3)	0
chr14	57279900	57618895	339	14q22.3	OTX2-AS1	0	0	0	S4(2.1)	0
chr7	11221358	11559802	338	7p21.3	AC004538.3	0.004	0.107	245	S4(1.6)	0
chr4	159236462	159574524	338	4q32.1	RXFP1	0.003	0.053	19	S2(3.5)	0
chr9	20658307	20995954	338	9p21.3	FOCAD	0.791	1	392	S2(3.8)	0
chr6	55921387	56258892	338	6p12.1	COL21A1	0.008	0.134	85	S1(4.8)	0
chr7	95401865	95739634	338	7q21.3	DYNC1I1	0.003	0	0	S4(2)	0
chr10	97512962	97849995	337	10q24.1	ENTPD1-AS1	0.074	0.613	156	S4(2.4)	0
chr4	79892901	80229952	337	4q21.21	LINC01088	0.008	0	0	S3(2.8)	0
chr3	43396350	43733086	337	3p21-22	ANO10	0.718	1	341	S1(4.9)	0
chr6	45295893	45632086	336	6p21.1	RUNX2	1.314	0.742	270	S1(5)	0
chr11	115039937	115375675	336	11q23.3	CADM1	0.002	0	0	S4(2.1)	0
chr6	53794779	54131078	336	6p12.1	MLIP	0.014	0.053	151	S2(3.9)	0
chr15	61592524	61927648	335	15q22.2	RP11-507B12.2	0	0	0	S4(2.4)	0
chr2	134877553	135212192	335	2q21.2-3	MGAT5	1.048	1	347	S3(3.2)	0
chr6	37787274	38122400	335	6p21.2	ZFAND3	2.615	1	466	S1(4.7)	0
chr5	110998317	111333161	335	5q22.1	NREP	0.221	0.941	363	S2(4)	0
chrX	131760043	132095423	335	Xq26.2	HS6ST2	0	0	0	S4(1.6)	0
chr3	178244292	178578193	334	3q26.32	RP11-385J1.2	0.028	0.514	172	S3(3.2)	0
chr14	65877309	66210839	334	14q23.3	FUT8	1.328	1	459	S2(4.2)	0
chr6	57179602	57513375	334	6p11.2	PRIM2	1.583	0.988	225	S3(3)	0
chr2	54197974	54532437	334	2p16.2	ACYP2	0.231	1	344	S1(4.9)	0
chr5	64444562	64777747	333	5q12.3	ADAMTS6	2.078	1	351	S1(5.2)	0
chr3	58703091	59035810	333	3p14.2	C3orf67	0.051	0.954	322	S3(3.4)	0
chr2	196602426	196933536	331	2q32.3	DNAH7	0.012	0.215	72	S2(4.2)	0
chr10	11047258	11378674	331	10p14	CELF2	0.042	1	332	S3(2.5)	0
chrX	73183789	73513409	330	Xq13.2	FTX	0.666	0.971	320	S1(4.5)	0
chr7	16130816	16460947	330	7p21.2	ISPD	0.132	1	332	S3(3.3)	0
chr6	149068463	149398126	330	6q25.1	UST	0.463	1	349	S1(4.5)	0
chr5	104253192	104582065	329	5q21.2-3	CTD-2374C24.1	0.001	0	0	G2(1.4)	0
chr15	35509545	35838394	329	15q14	DPH6	0.345	1	378	S2(3.6)	0
chr8	130363936	130692485	329	8q24.21	CCDC26	0	0	0	S2(4.4)	0
chr12	113008183	113336686	329	12q24.13	RPH3A	0	0	0	S2(3.8)	0
chr1	227177565	227506175	329	1q42.13	CDC42BPA	1.621	1	339	S2(4.2)	0
chr7	89511666	89840949	329	7q21.13	STEAP2-AS1	0.004	0.147	49	S3(3.3)	0
chr11	75526211	75854239	328	11q13.5	UVRAG	0.833	1	335	S1(4.5)	0
chr7	26706680	27034858	328	7p15.2	SKAP2	0.147	0.606	224	S2(3.7)	0
chr5	115420687	115748459	328	5q23.1	COMMD10	0.568	1	364	S3(2.9)	0
chr21	34956992	35284635	328	21q22.11	AP000304.12	0.148	0.24	83	S1(5.1)	0
chr15	81719788	82047558	328	15q25.2	CTD-2034I4.1	0	0	0	S3(2.6)	0
chr8	74332603	74659943	327	8q21.11	STAU2	0.38	0.999	331	S1(4.6)	0
chr2	53759809	54087170	327	2p16.2	GPR75-ASB3	0.343	0.674	221	S2(3.7)	0
chr13	24553943	24881212	327	13q12.12	SPATA13	0.472	1	332	S1(4.9)	0
chr3	64670584	64997143	327	3p14.1	ADAMTS9-AS2	0.001	0	0	S3(3)	0
chr17	67573391	67899141	326	17q24.3	AC003051.1	0.002	0	0	S2(3.6)	0
chr10	65424423	65750328	326	10q21.3	RP11-170M17.1	0.001	0	0	S1(4.8)	0
chr9	109040672	109367076	326	9q31.2	RP11-308N19.1	0.002	0	0	S4(2.1)	0
chrX	113818550	114144624	326	Xq23	HTR2C	0	0	0	S2(3.5)	0
chr8	139600477	139926249	326	8q24.23-3	COL22A1	0.001	0.012	4	S4(1.5)	0
chr5	20611948	20937800	326	5p14.3	RP11-774D14.1	0	0	0	G2(1.3)	0
chr17	9153787	9479908	326	17p13.1	STX8	0.467	1	366	S4(2.3)	0
chr4	101944565	102269435	325	4q24	PPP3CA	1.396	1	338	S2(3.7)	0
chr10	35535952	35860852	325	10p11.21	CCNY	0.996	0.727	259	S2(4.3)	0
chr3	117391000	117716439	325	3q13.32	RP11-384F7.2	0	0	0	S3(2.7)	0
chr17	35441922	35766909	325	17q12	ACACA	1.021	1	335	S1(4.9)	0
chr15	50150434	50475014	325	15q21.2	ATP8B4	0.019	0.801	266	S1(4.5)	0
chr5	137946655	138270723	324	5q31.2	CTNNA1	1.422	0.562	224	S1(4.7)	0
chr3	130745693	131069309	324	3q22.1	NEK11	0.127	1	331	S3(3.3)	0
chr8	68334359	68658620	324	8q13.2	CPA6	0	0	0	S3(3.2)	0
chr2	190744334	191068210	324	2q32.2	C2orf88	0.005	0.016	96	S1(4.6)	0
chr15	44162961	44487450	324	15q15.3	FRMD5	0.191	1	331	S1(5.2)	0
chr18	46065416	46389588	324	18q21.1	CTIF	2.663	1	343	S1(5.3)	0
chr5	152869174	153193429	324	5q33.2	GRIA1	0.063	1	328	S2(3.8)	0
chr14	27305933	27629626	324	14q12	RP11-384J4.2	0	0	0	G2(1.4)	0
chr3	160473389	160796695	323	3q25-26	PPM1L	0.011	0.016	6	S3(3.2)	0
chr17	11144579	11467380	323	17p12	SHISA6	0	0	0	S4(1.7)	0
chr20	20370195	20693131	323	20p11.23	RALGAPA2	0.146	1	326	S4(2.4)	0
chr2	23608087	23931481	323	2p24.1	KLHL29	0.318	1	328	S2(3.8)	0
chr18	34823009	35146000	323	18q12.2	CELF4	0	0	0	S3(2.5)	0.524	1		1
chrY	16634517	16957530	323	Yq11.221	NLGN4Y	0.359	0.997	330	NULL	0
chr5	134368969	134691744	323	5q31.1	CTC-349C3.1	0.243	1	366	S1(5.2)	0
chr4	13656802	13978699	322	4p15.33	RP11-341G5.1	0.018	0.28	98	S2(3.7)	0
chrX	112859586	113181506	322	Xq23	RP5-964N17.1	0	0	0	S4(1.5)	0
chr20	10653575	10975572	322	20p12.2	RP11-103J8.1	0.015	0.351	319	S3(3.2)	0
chr13	33929342	34250905	322	13q13.1-2	RP11-141M1.3	0.031	1	327	S1(4.7)	0
chr7	151253196	151574210	321	7q36.1	PRKAG2	0.162	0.565	186	S1(5.1)	0
chr14	76099967	76421421	321	14q24.3	TTLL5	0.379	1	516	S2(3.9)	0
chr5	151329131	151650009	321	5q33.1	CTB-12O2.1	0.005	0	0	S2(3.5)	0
chr18	61771324	62090836	320	18q22.1	RP11-146N18.1	0	0	0	S3(2.5)	0
chr17	65373574	65693372	320	17q24.2	PITPNC1	0.374	1	325	S1(4.9)	0
chr12	130880681	131200826	320	12q24.33	RIMBP2	0	0	0	S4(2)	0
chr7	93220884	93540577	320	7q21.3	GNGT1	0.001	0	0	S2(4)	0
chr10	52065359	52384923	320	10q11.23	SGMS1	0.774	0.999	351	S2(3.7)	0
chr3	66119284	66438540	319	3p14.1	SLC25A26	0.323	0.526	184	S1(5.1)	0
chr12	81331593	81650533	319	12q21.31	ACSS3	0.01	0.062	21	S3(2.9)	0
chr15	92396924	92715665	319	15q26.1	SLCO3A1	0.47	1	324	S4(2)	0
chr12	116395710	116715143	319	12q24.21	MED13L	3.681	1	378	S1(4.5)	0
chr3	53528682	53847760	319	3p21.1	CACNA1D	0.001	0.013	4	S2(3.5)	0
chr2	169312371	169631644	319	2q24.3	CERS6	0.627	1	333	S3(3.3)	0
chr7	8473584	8792593	319	7p21.3	NXPH1	0	0	0	G2(1.3)	0
chr2	173600001	173917621	318	2q31.1	RAPGEF4	0.021	0.717	228	S1(5.3)	0
chr10	60272899	60591195	318	10q21.1	BICC1	2.534	1	404	S1(4.6)	0
chr8	118806728	119124092	317	8q24.11	EXT1	11.098	1	583	S1(5.2)	0
chr17	70319263	70636611	317	17q24.3	LINC00511	0.552	0.896	467	S1(4.9)	0
chr11	112831996	113149158	317	11q23.2	NCAM1	0	0	0	S4(2.2)	0
chr16	13340172	13656775	317	16p13.12	U91319.1	0	0.013	4	S4(2.2)	0
chr9	14081841	14398982	317	9p22-23	NFIB	0.001	0	0	S4(2.1)	0
chr12	19556978	19873735	317	12p12.3	AEBP2	0.403	0.669	212	S2(3.7)	0
chr12	111471827	111788358	317	12q24.11-12	CUX2	0	0	0	S2(4.3)	0
chr12	71518864	71835678	317	12q21.1	TSPAN8	0	0	0	S4(2.4)	0
chr5	72921982	73237818	316	5q13.2	ARHGEF28	1.206	1	327	S1(5.1)	0
chr15	99192199	99507759	316	15q26.3	IGF1R	1.711	1	329	S2(3.5)	0
chr2	153191750	153506348	315	2q23.3	FMNL2	0.866	1	329	S2(4.4)	0
chr12	20522178	20837315	315	12p12.2	PDE3A	0.007	0.016	5	S3(2.7)	0
chr9	80331002	80646374	315	9q21.2	GNAQ	1.611	1	340	S2(3.6)	0
chr6	38683116	38998301	315	6p21.2	DNAH8	0.001	0	0	S3(3.3)	0
chr5	143550395	143865249	315	5q31.3	KCTD16	0.081	0.889	290	S2(3.9)	0
chr9	75136716	75451267	315	9q21.13	TMC1	0.053	0.661	208	S1(4.5)	0
chr8	59717976	60031767	314	8q12.1	TOX	2.631	1	339	S2(4.4)	0
chr11	128834954	129149219	314	11q24.3	ARHGAP32	0.457	1	336	S3(3.4)	0
chr1	162039563	162353321	314	1q23.3	NOS1AP	0.013	0.3	94	S1(5)	0
chr15	36231367	36544458	313	15q14	RP11-184D12.1	0	0	0	S2(3.5)	0
chr17	13659794	13972812	313	17p12	COX10-AS1	0.235	1	315	S3(3.3)	0
chr4	105575030	105887950	313	4q24	RP11-556I14.2	0	0	0	S4(1.8)	0
chr15	35838395	36151202	313	15q14	DPH6-AS1	0.024	0.437	106	S3(3.4)	0
chr1	233119180	233431459	312	1q42.2	PCNXL2	0.718	1	323	S3(3.1)	0
chr8	121072018	121384275	312	8q24.12	COL14A1	0.001	0	0	S2(3.9)	0
chr2	122095351	122407163	312	2q14.2-3	CLASP1	1.788	1	334	S2(4.4)	0
chr3	1134259	1445901	312	3p26.3	CNTN6	0	0	0	G2(1.4)	0
chr3	159631188	159943086	312	3q25.33	IL12A-AS1	0.009	0.248	109	S1(5.2)	0
chr15	77400470	77712486	312	15q24.3	PEAK1	2.251	1	341	S1(4.6)	0
chr9	112403067	112713755	311	9q31.3	PALM2	0.403	0.554	484	S1(5.1)	0
chr10	90033620	90344287	311	10q23.31	RNLS	0.018	0.634	197	S1(4.9)	0
chr4	114372187	114683083	311	4q26	CAMK2D	3.242	1	332	S1(4.5)	0
chr3	177159708	177470093	310	3q26.32	LINC00578	0.002	0	0	S2(4)	0
chr2	210288781	210598842	310	2q34	MAP2	0.031	1	313	S3(3.2)	0
chr7	79998890	80308593	310	7q21.11	CD36	0.025	0.68	265	S1(4.9)	0
chr17	71330522	71640228	310	17q25.1	SDK2	0	0	0	S2(3.9)	0
chr16	47188297	47498060	310	16q12.1	ITFG1	0.769	0.995	319	S3(2.6)	0
chr17	19912656	20222339	310	17p11.2	SPECC1	0.595	0.529	165	S2(3.5)	0
chr3	577913	887698	310	3p26.3	AC090044.1	0	0	0	G2(1.4)	0
chr18	76829284	77138283	309	18q23	ATP9B	0.594	1	327	S4(2.1)	0
chr18	44812095	45120914	309	18q21.1	CTD-2130O13.1	0.094	0.995	330	S4(2.2)	0
chr7	120628730	120937498	309	7q31.31	CPED1	0.823	1	337	S2(4.4)	0
chr21	38979677	39288749	309	21q22.13	KCNJ6	0.003	0	0	S2(4)	0
chr7	107788067	108097161	309	7q31.1	NRCAM	0.001	0	0	S2(4.3)	0
chr1	176826437	177134109	308	1q25.2	ASTN1	0	0	0	S4(2.2)	0
chrX	111017542	111326004	308	Xq23	TRPC5	0	0	0	S4(1.5)	0
chr9	129677052	129985445	308	9q33.3	RALGPS1	0.046	1	328	S1(4.9)	0
chr9	3218296	3526004	308	9p24.2	RFX3	0.273	1	320	S2(3.5)	0
chr20	20033157	20341346	308	20p11.23	C20orf26	0.001	0	0	S2(3.7)	0
chr7	47314751	47622156	307	7p12.3	TNS3	1.733	0.998	360	S1(4.8)	0
chr12	104849072	105155792	307	12q23.3	CHST11	0.069	1	311	S1(5)	0
chr13	98794815	99102027	307	13q32.2	FARP1	1.663	1	327	S1(4.7)	0
chrX	122318005	122624766	307	Xq25	GRIA3	1.16	1	318	S2(4)	0
chr6	107473760	107780768	307	6q21	PDSS2	0.414	1	346	S2(3.5)	0
chr14	26305063	26612511	307	14q12	RP11-314P15.2	0	0	0	G2(1.4)	0
chr8	128806778	129113499	307	8q24.21	PVT1	2.544	1	373	S1(5.1)	0
chr11	13983913	14289646	306	11p15.2	SPON1	0	0	0	S2(4.3)	0
chr11	72547789	72853306	306	11q13.4	FCHSD2	1.824	1	350	S1(5.2)	0
chr1	224622361	224928251	306	1q42.12	CNIH3	0.126	1	333	S1(5.3)	0
chr10	16865962	17171830	306	10p13	CUBN	0.037	1	312	S1(5.4)	0
chr2	179390715	179695529	305	2q31.2	TTN	0	0	0	S3(3.1)	0
chr5	75699073	76003957	305	5q13.3	IQGAP2	0.002	0	0	S1(4.5)	0
chr8	10753554	11058875	305	8p23.1	XKR6	0.387	1	345	S3(3.1)	0
chr5	81267843	81572676	305	5q14.1-2	ATG10	0.277	1	309	S3(3.4)	0
chr9	71320574	71624092	304	9q21.11	PIP5K1B	0.027	0.069	21	S3(3.3)	0
chr6	19535174	19839311	304	6p22.3	RP1-167F1.2	0.037	0.83	275	S4(2.4)	0
chr17	27952955	28257294	304	17q11.2	SSH2	0.843	1	313	S1(5)	0
chr11	100558383	100862668	304	11q22.1	ARHGAP42	0.208	1	306	S3(2.6)	0
chr16	63348167	63651950	304	16q21	RP11-368L12.1	0	0	0	G2(1.4)	0
chr12	64238072	64541613	304	12q14.2	SRGAP1	4.589	1	412	S1(5)	0
chr2	189156395	189460653	304	2q32.1-2	GULP1	2.697	1	342	S2(3.9)	0
chr2	84743578	85046713	303	2p11.2	DNAH6	0.004	0	0	S2(4.4)	0
chrX	24712035	25015103	303	Xp21-22	POLA1	0.291	1	311	S2(3.5)	0
chr3	158680716	158984096	303	3q25.32	IQCJ	0.001	0	0	S1(4.9)	0
chr20	9518035	9819689	302	20p12.2	PAK7	0	0	0	S3(3)	0
chr19	38397867	38699012	301	19q13.13	SIPA1L3	1.497	1	342	S1(4.8)	0
chr7	51083908	51384515	301	7p12.1	COBL	0	0	0	S3(2.9)	0
chr20	16252748	16554078	301	20p12.1	KIF16B	0.228	1	310	S4(2)	0
chr7	151832009	152133090	301	7q36.1	KMT2C	1.175	1	315	S3(3.1)	0
chr10	131265447	131566271	301	10q26.3	MGMT	0.068	1	303	S4(1.8)	0
chr1	90098698	90398809	300	1p22.2	RP11-302M6.4	0.545	0.853	145	S1(4.9)	0
chr11	43577985	43878167	300	11p11.2	HSD17B12	0.577	0.622	191	S2(4)	0
chr2	217559186	217858802	300	2q35	AC007563.5	0.003	0.031	13	S2(4.4)	0
chr2	48168834	48468122	299	2p16.3	AC079807.4	0.001	0	0	S2(3.7)	0
chr10	64926980	65225722	299	10q21.3	JMJD1C	2.142	1	376	S2(3.9)	0
chr4	98255785	98554974	299	4q22.3	RP11-681L8.1	0.007	0	0	G2(1.4)	0
chr2	111953926	112252677	299	2q13	MIR4435-1HG	0.568	1	350	S1(5)	0
chr21	47063607	47362368	299	21q22.3	PCBP3	0.469	1	339	S1(4.9)	0
chr10	64133950	64431771	298	10q21.2	ZNF365	0.052	0.524	156	S1(4.6)	0
chr5	42423878	42721979	298	5p12-13	GHR	0.04	1	300	S4(2.3)	0
chr2	181966658	182264286	298	2q31.3	AC104820.2	0.009	0.151	167	S2(3.6)	0
chr2	160175489	160473203	298	2q24.2	BAZ2B	1.003	1	330	S1(4.9)	0
chr10	49892920	50191001	298	10q11.22-23	WDFY4	0	0	0	S2(3.7)	0
chr1	222262510	222560776	298	1q41	RP11-400N13.1	0.005	0	0	S2(4)	0
chr14	58466452	58764857	298	14q23.1	C14orf37	0.454	0.812	157	S2(4.1)	0
chr17	46210801	46507637	297	17q21.32	SKAP1	0	0	0	S1(4.8)	0
chr4	85590703	85887544	297	4q21.23	WDFY3	1.452	1	328	S3(3.1)	0
chr6	157802164	158099178	297	6q25.3	ZDHHC14	0.22	1	302	S1(4.7)	0
chr7	132469628	132766848	297	7q32-33	CHCHD3	1.006	1	311	S3(3.3)	0
chr14	42076772	42373752	297	14q21.1	LRFN5	0	0	0	S4(1.5)	0
chr14	66679527	66976112	297	14q23.3	RP11-72M17.1	0.012	0.226	67	S3(2.5)	0
chr4	35949842	36246131	296	4p14	ARAP2	0	0	0	G2(1.4)	0
chr8	89044236	89340254	296	8q21.3	MMP16	1.037	1	399	S4(2.4)	0
chr2	25600066	25896503	296	2p23.3	DTNB	0.134	1	299	S1(4.8)	0
chr15	72114631	72410918	296	15q23	MYO9A	0.904	1	316	S1(5.1)	0
chrX	107386779	107682727	296	Xq22.3	COL4A6	0.002	0	0	S3(2.9)	0
chr9	85857904	86153461	296	9q21.32	FRMD3	0.266	1	301	S3(2.6)	0
chr9	103790990	104087417	296	9q31.1	LPPR1	0	0	0	S3(2.8)	0
chr9	95087765	95382815	295	9q22.31	CENPP	0.184	1	310	S1(4.6)	0
chr1	113933370	114228545	295	1p13.2	MAGI3	0.408	1	326	S2(4)	0
chr10	98757794	99052413	295	10q24.1	ARHGAP19-SLIT1	0.103	0.332	99	S1(4.6)	0
chr9	79226291	79521003	295	9q21.2	PRUNE2	0.003	0	0	S2(4)	0
chr2	168810529	169104651	294	2q24.3	STK39	1.687	0.999	322	S3(3.4)	0
chr5	77296348	77590579	294	5q14.1	AP3B1	1.365	1	322	S2(4)	0
chr6	143857981	144152322	294	6q24.2	PHACTR2	1.24	1	332	S1(4.7)	0
chr15	49619158	49913128	294	15q21.2	FAM227B	0.051	1	300	S1(4.6)	0
chr8	71021996	71316040	294	8q13.3	NCOA2	0.882	0.998	305	S3(2.9)	0
chr3	67410883	67705038	294	3p14.1	SUCLG2	1.689	1	449	S4(2.3)	0
chr5	106712589	107006596	294	5q21.3	EFNA5	0.005	0	0	S3(3)	0
chr20	45523262	45817492	294	20q13.12	EYA2	0.005	0	0	S2(4.3)	0
chr13	99445740	99738879	293	13q32.3	DOCK9	0.503	1	299	S1(4.7)	0
chr11	31833938	32127301	293	11p13	RCN1	0.148	0.074	31	S3(3.2)	0
chr6	147981838	148275073	293	6q24.3	RP11-307P5.1	0.128	1	765	S3(3.3)	0
chr3	67705120	67998137	293	3p14.1	RP11-81N13.1	0.05	0.738	217	S3(2.6)	0
chr9	84887670	85179347	292	9q21.32	RP11-15B24.5	0.004	0	0	S3(3.2)	0
chr6	133561735	133853258	292	6q23.2	EYA4	0	0	0	S3(2.7)	0
chr16	65318401	65610203	292	16q21	LINC00922	0.001	0	0	S2(4.1)	0
chr1	183605219	183897665	292	1q25.3	RGL1	0.58	1	304	S1(5.1)	0
chr19	28926294	29218684	292	19q12	AC005307.3	0.049	0.821	241	S4(2.1)	0
chr21	27252860	27543446	291	21q21.3	APP	1.977	1	335	S3(3.2)	0
chr22	40440820	40731812	291	22q13.1	TNRC6B	0.988	1	302	S1(4.6)	0
chr12	63037761	63328817	291	12q14.1-2	PPM1H	0.947	1	333	S1(5.2)	0
chr1	231664398	231954990	291	1q42.2	TSNAX-DISC1	0.538	1	569	S2(3.7)	0
chr22	36134782	36424473	290	22q12.3	RBFOX2	2.422	1	305	S1(5)	0
chr8	72740401	73030628	290	8q13.3	RP11-383H13.1	0.137	0.948	353	S3(3)	0
chr1	45482070	45771881	290	1p34.1	ZSWIM5	0.04	0.992	292	S1(4.7)	0
chr2	208104587	208394519	290	2q33.3	AC007879.5	0.024	0.289	68	S1(5)	0
chr13	100258918	100549387	290	13q32.3	CLYBL	0.056	0.945	276	S2(3.5)	0
chr18	22641889	22932154	290	18q11.2	ZNF521	0.413	1	310	S2(3.5)	0
chr5	159990126	160279221	289	5q34	ATP10B	0	0	0	S3(2.6)	0
chr7	104751150	105039755	289	7q22.3	SRPK2	1.398	0.968	285	S1(5.1)	0
chr22	26138110	26427007	289	22q12.1	MYO18B	0	0	0	S3(2.9)	0
chr14	82207345	82496693	289	14q31.1	RP11-666E17.1	0.001	0.01	3	G2(1.4)	0
chr15	56922378	57210769	288	15q21.3	ZNF280D	0.532	1	333	S2(4.4)	0
chr3	107241782	107530171	288	3q13.12	BBX	0.83	0.994	295	S2(3.5)	0
chr17	9813925	10101868	288	17p13.1	GAS7	0.009	0.035	10	S3(3)	0
chr4	73146685	73434516	288	4q13.3	ADAMTS3	0.001	0	0	S3(2.8)	0
chr11	35965530	36253686	288	11p13	LDLRAD3	0.2	1	297	S1(4.7)	0
chr1	172745044	173033155	288	1q24-25	RP1-15D23.2	0.042	0.728	214	S1(5.4)	0
chr3	16844158	17132086	288	3p24.3	PLCL2	0.28	0.717	212	S2(4)	0
chr11	4726156	5013659	288	11p15.4	MMP26	0	0	0	S4(1.7)	0
chr6	22744623	23032009	287	6p22.3	RP1-209A6.1	0	0	0	S3(2.7)	0
chr6	114376749	114664209	287	6q21-22	HS3ST5	0	0	0	S3(2.8)	0
chr8	22570768	22857513	287	8p21.3	PEBP4	0.006	0.136	58	S1(5.2)	0
chr17	29421944	29709134	287	17q11.2	NF1	1.574	1	297	S1(5.2)	0
chr2	159027592	159313265	286	2q24.1	CCDC148	0.009	0.3	87	S3(3.3)	0
chr11	86748885	87034800	286	11q14.2	TMEM135	0.65	1	327	S2(4.1)	0
chr4	115748918	116035032	286	4q26	NDST4	0	0	0	G2(1.4)	0
chr21	35445891	35732332	286	21q22.11	AP000320.7	0.398	0.927	266	S1(4.6)	0
chrX	149106845	149392815	286	Xq28	LINC00894	0.094	0.622	178	S1(5)	0
chr4	19173957	19458617	285	4p15.31	RP11-3J1.1	0.001	0	0	S2(3.7)	0
chr5	77781037	78065844	285	5q14.1	LHFPL2	0.466	0.614	227	S1(4.9)	0
chr1	84041458	84326706	285	1p31.1	RP11-475O6.1	0.001	0.001	139	S3(2.8)	0
chrX	151334705	151619830	285	Xq28	GABRA3	0	0	0	S4(2)	0
chr7	82993221	83278326	285	7q21.11	SEMA3E	0	0	0	S4(2.1)	0
chr3	11313994	11599139	285	3p25.3	ATG7	1.069	1	327	S1(4.9)	0
chr1	94027346	94312706	285	1p22.1	BCAR3	3.221	1	305	G1(5.7)	0
chr8	68864352	69149265	285	8q13.2	PREX2	0	0	0	S3(2.8)	0
chr6	117639373	117923691	284	6q22.1	GOPC	0.4	0.184	126	S1(4.9)	0
chr12	29653772	29937692	284	12p11.22	TMTC1	0	0	0	S3(3.3)	0
chr7	47735327	48019178	284	7p12.3	HUS1	0.175	0.207	59	S1(5)	0
chr1	92974252	93257961	284	1p22.1	EVI5	0.805	0.977	299	S1(4.5)	0
chr22	43924623	44208217	284	22q13.2-31	EFCAB6	0.028	0.443	127	S3(3.3)	0
chr3	99548984	99833357	284	3q12.1	FILIP1L	0.729	0.216	53	S1(5.1)	0
chr4	9772776	10056560	284	4p16.1	SLC2A9	0.031	0.705	200	S3(3.3)	0
chrX	2137556	2420846	283	Xp22.33	DHRSX	0	0	0	S3(3.4)	0
chr12	71031852	71314623	283	12q15	PTPRR	0.014	0.087	25	S3(3.2)	0
chr18	18822202	19105378	283	18q11.1-2	GREB1L	0.255	1	306	S1(4.7)	0
chr2	61414597	61697904	283	2p15	USP34	1.533	1	296	S1(4.7)	0
chr4	48499377	48782339	283	4p11	FRYL	1.415	1	295	S2(4.4)	0
chrX	110187512	110470589	283	Xq23	PAK3	0.001	0	0	S4(2.4)	0
chr10	28339921	28623415	283	10p12.1	MPP7	0.016	0.401	117	S1(4.7)	0
chr13	95672082	95953687	282	13q32.1	ABCC4	1.068	1	308	S3(3.2)	0
chr21	39751948	40033704	282	21q22.2	ERG	0	0	0	S2(4.4)	0
chr1	12290123	12572099	282	1p36.22	VPS13D	0.817	1	298	S1(4.9)	0
chr12	40019968	40302102	282	12q12	C12orf40	0	0	0	S4(1.9)	0
chr16	76311175	76593135	282	16q23.1	CNTNAP4	0	0	0	S4(1.5)	0
chr13	77618791	77901185	282	13q22.3	MYCBP2	1.2	1	301	S3(3.4)	0
chr5	129240164	129522327	282	5q23.3	CHSY3	0.019	0.898	255	S4(1.8)	0
chr9	20341662	20622542	281	9p21.3	MLLT3	1.15	1	303	S2(3.7)	0
chr15	29129628	29410518	281	15q13.1	APBA2	0	0	0	S3(3.1)	0
chrX	76760355	77041702	281	Xq21.1	ATRX	0.913	1	287	S2(3.7)	0
chrX	21392535	21672813	280	Xp22.12	CNKSR2	0.001	0	0	S3(3.1)	0
chr4	106962755	107242652	280	4q24	TBCK	0.581	0.985	295	S3(3.2)	0
chr6	143381632	143661441	280	6q24.2	AIG1	0.521	1	283	S1(4.5)	0
chr12	119825791	120105884	280	12q24.23	RP11-768F21.1	0.001	0	0	S3(2.7)	0
chr4	189321889	189602205	280	4q35.2	LINC01060	0.002	0	0	S4(1.6)	0
chrX	129757349	130037208	280	Xq26.1	ENOX2	0.294	1	282	S3(3.3)	0
chr8	106792473	107072752	280	8q23.1	RP11-152P17.2	0.025	0.939	264	S3(3.1)	0
chr4	124571421	124851561	280	4q28.1	RP11-93L9.1	0.001	0	0	S2(3.9)	0
chr6	148593439	148873186	280	6q24.3	SASH1	2.021	1	286	S1(4.9)	0
chr10	29746266	30025710	279	10p11.23	SVIL	0.438	1	293	S1(4.8)	0
chr9	19507449	19786926	279	9p22.1	SLC24A2	0	0	0	S3(3)	0
chr12	20963635	21243040	279	12p12.2	SLCO1B3	0.001	0	0	S4(1.7)	0
chr12	106889735	107168696	279	12q23.3	RP11-144F15.1	0.013	0.284	80	S3(3.1)	0
chr2	24714782	24993571	279	2p23.3	NCOA1	0.593	1	287	S2(4.3)	0
chr10	26223195	26501456	278	10p12.1	MYO3A	0	0	0	S4(1.9)	0
chr8	121547984	121825513	278	8q24.12	SNTB1	0.297	1	320	S1(4.6)	0
chr1	77747735	78025651	278	1p31.1	AK5	0.495	1	292	S1(5.2)	0
chr5	128795957	129074376	278	5q23.3	ADAMTS19	0	0	0	S4(1.7)	0
chr5	57878047	58155213	277	5q11.2	RAB3C	0	0	0	S4(2.4)	0
chr1	197170591	197447585	277	1q31.3	CRB1	0.022	0.418	117	S3(3.1)	0
chr12	32259768	32536567	277	12p11.21	BICD1	0.837	1	283	S2(4.4)	0
chr2	225629806	225907162	277	2q36.2	DOCK10	4.453	1	306	S1(4.6)	0
chr2	144053154	144329674	277	2q22.2-3	RP11-570L15.2	0	0	0	S3(3.1)	0
chr12	20968672	21245679	277	12p12.2	SLCO1B7	0.001	0	0	S4(1.7)	0
chr4	137039829	137316626	277	4q28.3	RP11-775H9.2	0	0	0	G2(1.4)	0
chrX	127457597	127734446	277	Xq25	RP1-30E17.2	0	0	0	G2(1.3)	0
chr7	116593291	116870157	277	7q31.2	ST7	1.003	0.999	290	S1(4.8)	0
chr16	72816783	73093597	277	16q22.2-3	ZFHX3	2.519	0.996	297	S2(3.7)	0
chr5	111478137	111755013	277	5q22.1-2	EPB41L4A	0.001	0	0	S3(3.1)	0
chr5	102089684	102366809	277	5q21.1	PAM	2.312	1	279	S2(4.4)	0
chr7	42000547	42277469	277	7p14.1	GLI3	1.292	1	288	S2(4)	0
chr6	15246526	15522252	276	6p22.3	JARID2	2.026	1	301	S3(2.9)	0
chr4	78078303	78354542	276	4q21.1	CCNG2	0.102	0.109	30	S2(3.9)	0
chr9	470290	746105	276	9p24.3	KANK1	0.843	0.227	84	S2(3.5)	0
chr16	27798849	28074830	276	16p12.1	GSG1L	0.004	0	0	S2(3.6)	0
chr11	108535751	108811657	276	11q22.3	DDX10	0.681	1	294	S2(4.1)	0
chr14	91006931	91282823	276	14q32.11	TTC7B	0.635	0.999	303	S3(3.4)	0
chr5	82373316	82649606	276	5q14.2	XRCC4	0.281	1	346	S3(3)	0
chr6	6346697	6623004	276	6p25.1	LY86-AS1	0	0	0	S4(2.3)	0
chr14	60062693	60337684	275	14q23.1	RTN1	0.002	0	0	S3(2.7)	0
chr12	15475330	15750333	275	12p12.3	PTPRO	0	0	0	S2(4.4)	0
chr11	5684424	5959849	275	11p15.4	TRIM5	0.061	0.084	61	S3(2.6)	0
chr8	126103920	126379362	275	8q24.13	NSMCE2	1.006	1	295	S1(4.5)	0
chr14	73086003	73360809	275	14q24.2	DPF3	1.547	1	346	S1(5.3)	0
chr7	72023728	72298777	275	7q11.22-23	TYW1B	0.095	1	276	S2(3.6)	0
chr4	44175925	44450824	275	4p13	KCTD8	0	0	0	G2(1.4)	0
chr12	20968607	21243179	275	12p12.2	LST3	0.001	0	0	S4(1.7)	0
chr11	31531296	31805546	274	11p13	ELP4	0.265	1	284	S3(2.9)	0
chr3	156977530	157251408	274	3q25.31-32	VEPH1	1.021	1	304	S1(5.2)	0
chr16	53088944	53363062	274	16q12.2	CHD9	1.599	1	286	S3(2.9)	0
chr8	138821686	139095813	274	8q24.23	RP11-238K6.1	0	0	0	S4(1.5)	0
chr3	123328895	123603178	274	3q21.1	MYLK	6.574	1	299	S1(5.3)	0
chr1	219858768	220131989	273	1q41	SLC30A10	0	0	0	S3(2.9)	0
chr3	119540169	119813264	273	3q13.33	GSK3B	2.373	1	281	S1(5.1)	0
chr8	80870570	81143467	273	8q21.13	TPD52	0.3	0.267	138	S2(3.8)	0
chr18	58297399	58569959	273	18q21.32	RP11-325K19.1	0.001	0	0	S4(1.9)	0
chr12	80799773	81072802	273	12q21.31	PTPRQ	0.022	0.657	140	S1(4.9)	0
chr1	95975671	96247898	272	1p21.3	RP11-286B14.1	0	0	0	S4(2)	0
chr7	105245513	105517050	272	7q22.3	ATXN7L1	0.711	1	294	S1(5)	0
chr9	124584206	124855885	272	9q33.2	TTLL11	0.332	1	275	S1(5.2)	0
chr3	81538849	81811312	272	3p12.2	GBE1	2.301	1	394	S3(3.4)	0
chr15	87975288	88247083	272	15q25.3	RP11-648K4.2	0	0	0	S3(2.5)	0
chr6	138743179	139013708	271	6q23-24	NHSL1	0.351	1	283	S2(3.5)	0
chr1	18434239	18704977	271	1p36.13	IGSF21	0	0	0	S4(2.3)	0
chr4	26165076	26436541	271	4p15.2	RBPJ	0.364	0.424	131	S1(5.1)	0
chr1	197473877	197744826	271	1q31.3	DENND1B	1.173	1	303	S2(4.1)	0
chr5	75378996	75649764	271	5q13.3	SV2C	0	0	0	S3(2.7)	0
chr5	16665394	16936372	271	5p15.1	MYO10	3.16	1	288	S1(4.7)	0
chr14	36007557	36278510	271	14q13.2	RALGAPA1	0.57	1	293	S2(4.2)	0
chr6	46188474	46459709	271	6p12-21	RCAN2	0.211	0.999	274	S3(2.9)	0
chr5	17684692	17955966	271	5p15.1	RP11-454P21.1	0	0	0	S4(1.9)	0
chr4	182795590	183066402	271	4q34.3	AC108142.1	0.026	0.391	106	S3(2.6)	0
chr7	49890016	50160925	271	7p12.2	ZPBP	0	0	0	G2(1.4)	0
chr5	110559350	110830584	271	5q22.1	CAMK4	0.259	1	289	S3(3.1)	0
chr20	58152563	58422766	270	20q13.32-33	PHACTR3	0	0	0	S4(2.4)	0
chr9	128199671	128469513	270	9q33.3	MAPKAP1	1.814	1	281	S1(5.2)	0
chr11	12695968	12966298	270	11p15.2-3	TEAD1	4.141	1	296	S1(5.1)	0
chr13	102104965	102375456	270	13q33.1	ITGBL1	0.88	1	318	S2(4)	0
chr18	24495594	24765281	270	18q11.2	CHST9	0	0	0	S4(1.5)	0
chr11	125034582	125303285	269	11q24.2	PKNOX2	0.001	0	0	S2(3.5)	0
chr12	58937906	59206842	269	12q14.1	RP11-362K2.2	0.003	0	0	S2(4)	0
chr15	29991570	30261068	269	15q13.1	TJP1	0.718	0.46	213	S2(4.1)	0
chr5	80256490	80525975	269	5q14.1	RASGRF2	0.102	1	271	S2(4.3)	0
chr7	87563457	87832204	269	7q21.12	ADAM22	0.001	0	0	S4(2.1)	0
chr12	74526945	74796315	269	12q21.1	RP11-81H3.2	0	0	0	S4(1.6)	0
chr8	133879202	134147147	268	8q24.22	TG	0.011	0	0	S2(4.3)	0
chr10	80166300	80434724	268	10q22.3	LINC00856:2	0.008	0.25	207	S2(4.4)	0
chr8	124864226	125132302	268	8q24.13	FER1L6	0.004	0	0	S2(4)	0
chr3	180320645	180588793	268	3q26.33	CCDC39	0.001	0.015	4	S4(1.7)	0
chr4	147175126	147443123	268	4q31.22	SLC10A7	0.569	1	289	S3(2.8)	0
chr7	37723445	37991543	268	7p14.1	EPDR1	0	0	0	S4(1.6)	0
chr1	187061973	187329455	267	1q31.1	LINC01036	0	0	0	S4(1.5)	0
chr11	122026129	122293579	267	11q24.1	RP11-820L6.1	0.535	0.181	87	S1(5.2)	0
chr10	105348284	105615301	267	10q24.33	SH3PXD2A	1.597	1	285	S1(5.4)	0
chr16	81478774	81745367	267	16q23.2-3	CMIP	1.506	1	269	S1(5)	0
chr2	152689289	152955593	266	2q23.3	CACNB4	0.008	0	0	S2(3.8)	0
chr3	189349204	189615068	266	3q28	TP63	0.002	0.013	4	S3(3.3)	0
chr18	57098171	57364612	266	18q21.32	CCBE1	5.143	1	338	S1(5)	0
chr13	34922179	35188307	266	13q13.2	RP11-16D22.2	0	0	0	S3(3.3)	0
chr18	21269406	21535030	266	18q11.2	LAMA3	0.045	1	275	S1(5.3)	0
chr2	168149680	168414843	265	2q24.3	AC074363.1	0.036	1	527	S4(2.3)	0
chr13	32605436	32870794	265	13q13.1	FRY	0.975	1	267	S1(4.7)	0
chr10	123748688	124014060	265	10q26.13	TACC2	0.615	0.537	177	S2(4)	0
chr18	60382671	60647666	265	18q21.33	PHLPP1	0.361	1	278	S2(3.6)	0
chr11	89057523	89322779	265	11q14.3	NOX4	0.104	0.629	197	S3(2.9)	0
chr1	83368865	83632498	264	1p31.1	RP4-601K24.1	0	0	0	S4(2.2)	0
chr2	159825145	160089170	264	2q24.2	TANC1	1.186	1	302	S1(4.9)	0
chr4	33777968	34041515	264	4p15.1	RP11-79E3.3	0	0	0	S3(3.2)	0
chr15	67835046	68099461	264	15q23	MAP2K5	0.435	1	277	S1(4.9)	0
chr1	175913966	176176629	263	1q25.1-2	RFWD2	1.247	0.985	201	S4(1.9)	0
chr5	9641416	9903938	263	5p15.2-31	CTD-2143L24.1	0.002	0	0	S1(4.7)	0
chrX	10865995	11129261	263	Xp22.2	RP11-120D5.1	0.085	1	496	S2(3.9)	0
chr4	118349551	118612343	263	4q26	AC092661.1	0	0	0	G2(1.4)	0
chr2	135213329	135476570	263	2q21.3	TMEM163	0.002	0	0	S3(3.1)	0
chr20	34894257	35157040	263	20q11.23	DLGAP4	0.567	0.287	85	S1(4.9)	0
chr2	42721708	42984087	262	2p21	MTA3	0.39	0.719	206	S2(4.4)	0
chr2	32582095	32843966	262	2p22.3	BIRC6	1.881	1	271	S1(4.5)	0
chr4	178649910	178911904	262	4q34.3	RP11-389E17.1	0	0	0	S4(2)	0
chr12	15773091	16035263	262	12p12.3	EPS8	1.728	0.665	210	S1(5.3)	0
chr8	131792546	132054672	262	8q24.22	ADCY8	0	0	0	S2(4.3)	0
chr7	102453307	102715286	262	7q22.1	FBXL13	0.029	1	269	S1(5)	0
chr12	16500075	16762193	262	12p12.3	MGST1	0.402	0.932	245	S4(1.9)	0
chr12	89441963	89703330	261	12q21.33	RP11-13A1.3	0.006	0.076	64	S1(4.9)	0
chr9	117904096	118164923	261	9q33.1	2014-12-01	0.003	0	0	S1(5.2)	0
chr7	115878313	116139519	261	7q31.2	AC002066.1	0.62	1	297	G1(5.6)	0
chr13	39917028	40177665	261	13q13-14	LHFP	1.593	1	396	S3(3.1)	0
chr12	39040623	39301232	261	12q12	CPNE8	0	0	0	S4(1.7)	0
chr5	160715435	160976050	261	5q34	GABRB2	0	0	0	G2(1.4)	0
chr6	82201155	82462491	261	6q14.1	FAM46A	0.339	1	297	S2(4.1)	0
chr2	150443709	150704747	261	2q23.2-3	AC144449.1	0.032	0.474	124	S2(4.1)	0
chr17	2680349	2941033	261	17p13.3	RAP1GAP2	0.335	0.708	206	S2(4)	0
chr15	83847933	84108197	260	15q25.2	RP11-382A20.4	0.021	0.2	37	S3(3.4)	0
chrX	98716599	98976156	260	Xq22.1	XRCC6P5	0	0	0	S4(1.5)	0
chr4	155153398	155412930	260	4q31.3	DCHS2	0	0	0	S4(2.1)	0
chr1	85784163	86043933	260	1p22.3	DDAH1	7.648	1	301	G1(5.6)	0
chr2	158733213	158992666	259	2q24.1	UPP2	0.005	0.094	22	S3(3.3)	0
chr18	24916342	25175128	259	18q11-12	RP11-739N10.1	0	0	0	S4(1.6)	0
chr2	62115858	62374382	259	2p15	COMMD1	0.47	1	280	S2(4.1)	0
chr3	27151575	27410951	259	3p24.1	NEK10	1.526	1	300	S2(4.4)	0
chr10	74127097	74385899	259	10q22.1	MICU1	0.602	1	272	S1(5.2)	0
chr3	74311718	74570291	259	3p12.3	CNTN3	0	0	0	S3(2.8)	0
chr20	17206751	17465223	258	20p12.1	PCSK2	0	0	0	S1(4.5)	0
chr11	29357424	29615842	258	11p14.1	RP11-460B17.3	0	0	0	S2(3.7)	0
chrX	107683073	107940775	258	Xq22.3	COL4A5	0.001	0	0	S4(2.3)	0
chr10	37414784	37673039	258	10p11.21	ANKRD30A	0	0	0	S4(1.8)	0
chr1	180601139	180859387	258	1q25.3	XPR1	0.696	1	275	S1(4.5)	0
chr12	103631368	103889749	258	12q23.2-3	C12orf42	0	0	0	S4(2.2)	0
chr5	6933782	7190925	257	5p15.31	RP11-122F24.1	0	0	0	S4(2.4)	0
chr13	76123908	76381256	257	13q22.2	RP11-29G8.3	7.677	0.992	236	S1(5)	0
chr16	29262828	29519817	257	16p11.2	SNX29P2	0.001	0	0	S1(4.8)	0
chr3	196769430	197026171	257	3q29	DLG1	2.042	0.997	269	S1(5)	0
chr3	185823456	186080026	257	3q27.2-3	DGKG	0.015	0.012	72	S2(3.7)	0
chr2	121493198	121750229	257	2q14.2	GLI2	1.464	1	266	S1(5.1)	0
chr15	93855785	94112712	257	15q26.1	RP11-266O8.1	0	0	0	S4(2)	0
chr2	170683967	170940641	257	2q31.1	UBR3	1.047	1	276	S2(3.5)	0
chr21	35014705	35272165	257	21q22.11	ITSN1	1.036	0.823	212	S1(5.1)	0
chr11	103777913	104035107	257	11q22.3	PDGFD	0.055	1	264	S3(3.1)	0
chr4	160025329	160281321	256	4q32.1	RAPGEF2	1.475	1	296	S1(4.6)	0
chr3	126423062	126679249	256	3q21.3	CHCHD6	0.36	1	285	S2(3.8)	0
chr10	14560555	14816896	256	10p13	FAM107B	0.482	0.339	105	S1(4.6)	0
chrX	9431334	9687780	256	Xp22.2-31	TBL1X	1.068	0.995	276	S2(3.9)	0
chr15	51329684	51586109	256	15q21.2	RP11-108K3.1	0.007	0.089	153	S1(4.6)	0
chr3	127872296	128127485	255	3q21.3	EEFSEC	0.555	1	311	S1(5.1)	0
chr19	42901279	43156507	255	19q13.2	LIPE-AS1	0.074	0.91	233	S1(4.9)	0
chr11	116714117	116969153	255	11q23.3	SIK3	0.772	1	261	S1(5.2)	0
chr6	121400639	121655891	255	6q22.31	TBC1D32	0.204	1	292	S4(2.3)	0
chr2	221315399	221569286	254	2q35-36	AC067956.1	0.031	1	615	S3(3.1)	0
chr5	95860970	96115299	254	5q15	CAST	1.219	1	824	S1(5.2)	0
chr6	122793075	123047518	254	6q22.31	PKIB	0.005	0.096	74	S4(1.8)	0
chr10	116190871	116444762	254	10q25.3	ABLIM1	0.127	1	395	S1(4.5)	0
chr5	13690439	13944652	254	5p15.2	DNAH5	0.1	1	334	S1(4.7)	0
chr14	64550949	64804830	254	14q23.2-3	ESR2	0.002	0.025	7	S1(4.8)	0
chr9	127279553	127533589	254	9q33.3	NR6A1	0.061	1	257	G1(5.5)	0
chr5	96519302	96772921	254	5q15	RP11-155G15.2	0.033	0.88	225	S2(3.8)	0
chr4	152330367	152584784	254	4q31.3	FAM160A1	0.333	1	259	S2(4.2)	0
chr15	73344050	73597547	253	15q24.1	NEO1	0.089	0.998	259	S3(2.8)	0
chr2	226265363	226518734	253	2q36.3	NYAP2	0	0	0	S3(3.4)	0
chr10	7200585	7453450	253	10p14	SFMBT2	0.004	0	0	S4(2.2)	0
chr2	179385909	179639402	253	2q31.2	TTN-AS1	0.11	0.448	114	S3(3.1)	0
chr11	49580097	49831971	252	11p11.12	RP11-707M1.1	0	0	0	S4(1.5)	0
chr2	34608854	34860407	252	2p22.3	AC073218.1	0	0	0	S4(1.6)	0
chr3	172607147	172859058	252	3q26.31	SPATA16	0	0	0	S3(3.3)	0
chr4	143854347	144106014	252	4q31.21	RP11-284M14.1	0.024	0.256	66	S2(3.9)	0
chr13	96453833	96705736	252	13q32.1	UGGT2	0.63	1	286	S3(3.2)	0
chr2	58134785	58387055	252	2p16.1	VRK2	0.583	0.47	136	S3(3.1)	0
chr7	33944522	34195484	251	7p14.3	BMPER	0.234	1	263	S1(5.1)	0
chr3	182895830	183146566	251	3q27.1	MCF2L2	0.001	0	0	S2(3.6)	0
chr5	91745962	91996570	251	5q14.3	RP11-133F8.2	0.007	0	0	S3(3.3)	0
chr9	140513443	140764468	251	9q34.3	EHMT1	1.15	1	252	S1(4.5)	0
chr10	97071527	97321171	250	10q24.1	SORBS1	0.005	0	0	S2(3.8)	0
chr7	117105837	117356025	250	7q31.2	CFTR	0	0	0	S3(2.8)	0
chr2	149632818	149883273	250	2q23.1	KIF5C	0.001	0	0	S3(3.1)	0
chr5	64064756	64314590	250	5q12.3	CWC27	0.533	1	252	S1(5.2)	0
chr9	214853	465259	250	9p24.3	DOCK8	0	0	0	S3(3.2)	0
chr2	54950635	55199157	249	2p16.1-2	EML6	0.014	0.084	23	S1(5.3)	0
chr4	42410389	42659122	249	4p13	ATP8A1	0.005	0	0	G2(1.4)	0
chr15	53805937	54055075	249	15q21.3	WDR72	0	0	0	S4(1.7)	0
chr9	118916082	119164601	249	9q33.1	PAPPA	1.102	1	257	S1(4.5)	0
chr6	4706392	4955785	249	6p25.1	CDYL	0.97	0.719	192	S2(4.2)	0
chr15	94774766	95023632	249	15q26.2	MCTP2	0.046	1	250	S4(2.2)	0
chr8	108261720	108510283	249	8q23.1	ANGPT1	0.449	1	288	S2(4.2)	0
chr6	118781934	119031238	249	6q22.31	CEP85L	1.181	1	255	S2(4.1)	0
chr1	46252658	46501796	249	1p34.1	MAST2	0.724	0.936	244	S1(5)	0
chr2	131862419	132111282	249	2q21.1	PLEKHB2	0.388	0.197	62	S3(3)	0
chr2	152341849	152591001	249	2q23.3	NEB	0.001	0	0	S2(3.5)	0
chr7	124569926	124819369	249	7q31.33	RP11-3B12.1	0.055	0.738	184	S4(1.5)	0
chr12	72332625	72580398	248	12q21.1	TPH2	0.001	0	0	S2(3.7)	0
chr4	37892707	38140796	248	4p14	TBC1D1	0.928	1	261	S1(4.6)	0
chr5	21341941	21589481	248	5p14.3	GUSBP1	0.138	1	280	G2(1.3)	0
chr12	77718420	77966055	248	12q21.2	RP1-34H18.1	0.087	1	451	S2(3.8)	0
chr7	38423304	38671167	248	7p14.1	AMPH	0.12	1	253	S3(2.5)	0
chr10	120967100	121215131	248	10q26.11	GRK5	0.647	1	291	G1(5.5)	0
chr13	33677271	33924767	247	13q13.1	STARD13	2.854	1	260	S1(4.5)	0
chr15	67547137	67794598	247	15q23	IQCH	0.05	0.967	244	S1(4.9)	0
chr2	48757063	49003654	247	2p16.3	STON1-GTF2A1L	0.073	0.359	89	S3(3.1)	0
chr2	192813768	193060435	247	2q32.3	TMEFF2	0.002	0	0	S2(3.6)	0
chr15	98589895	98836406	247	15q26.3	CTD-2544M6.1	0.001	0	0	S2(3.9)	0
chr12	19282647	19529334	247	12p12.3	PLEKHA5	0.725	1	264	S2(3.6)	0
chr12	32552462	32798984	247	12p11.21	FGD4	0.395	0.456	120	S1(4.5)	0
chr9	140772240	141019076	247	9q34.3	CACNA1B	0.003	0	0	S3(3.2)	0
chr10	80828791	81076276	247	10q22.3	ZMIZ1	4.587	1	259	S1(5.2)	0
chr10	22045465	22292698	247	10p12.31	DNAJC1	0.395	1	281	S3(3.2)	0
chr1	44870865	45117396	247	1p34.1	RNF220	0.126	0.142	36	S1(5.2)	0
chr4	112748036	112993854	246	4q25	RP11-269F21.3	0	0	0	S2(4)	0
chr3	42850937	43097363	246	3p22.1	KRBOX1	0.049	0.547	137	S2(4.2)	0
chr3	6532165	6777816	246	3p26.1	AC069277.2	0	0	0	G2(1.4)	0
chr12	11802787	12048336	246	12p13.2	ETV6	1.888	1	259	S2(4.1)	0
chrX	109437413	109683461	246	Xq23	AMMECR1	0.606	0.521	149	G1(5.5)	0
chr3	118619403	118864915	246	3q13.32	IGSF11	0.013	0.128	131	S2(3.7)	0
chr10	134351323	134596979	246	10q26.3	INPP5A	0.972	1	249	S1(4.6)	0
chr8	81540685	81787016	246	8q21.13	ZNF704	0.001	0	0	S3(2.8)	0
chr10	128113565	128359079	246	10q26.2	C10orf90	0	0	0	S2(3.5)	0
chr3	129366634	129612419	246	3q22.1	TMCC1	0.79	1	270	S1(5)	0
chr2	101624078	101869328	245	2q11.2	TBC1D8	0.254	0.857	152	S1(5)	0
chr9	72042445	72287222	245	9q21.11-12	APBA1	0.41	1	253	S1(4.6)	0
chr6	24797600	25042238	245	6p22.3	FAM65B	0.547	0.486	135	S2(4)	0
chr4	100871162	101116256	245	4q23-24	RP11-15B17.1	0.005	0.095	25	S2(4.1)	0
chr12	68383224	68628466	245	12q15	IFNG-AS1	0.001	0	0	S2(4.2)	0
chr22	25348696	25593415	245	22q11.23	KIAA1671	0.002	0	0	S3(2.7)	0
chr1	199117725	199362435	245	1q32.1	RP11-382E9.1	0	0	0	S3(3.2)	0
chr2	31133332	31378068	245	2p23.1	GALNT14	0.005	0	0	S2(3.7)	0
chr6	169857306	170102159	245	6q27	WDR27	0.312	1	275	S2(3.8)	0
chr8	41510738	41754280	244	8p11.21	ANK1	0.249	0.644	148	S1(4.9)	0
chr1	243419319	243663394	244	1q43	SDCCAG8	0.604	1	274	S3(3.4)	0
chr3	100467999	100712359	244	3q12.2	ABI3BP	0.163	1	247	S2(4.4)	0
chr10	93806448	94050844	244	10q23.32	CPEB3	0.197	1	260	S1(4.7)	0
chr13	88079468	88323514	244	13q31.2	MIR4500HG	0	0	0	G2(1.3)	0
chr12	117645946	117889975	244	12q24.22	NOS1	0	0	0	S3(2.6)	0
chr14	80677761	80921812	244	14q31.1	DIO2-AS1	0	0	0	S2(4.1)	0
chr9	79792268	80036457	244	9q21.2	VPS13A	0.427	1	258	S2(3.6)	0
chr2	21540531	21784185	244	2p24.1	AC011752.1	0	0	0	S4(2)	0
chr1	202317826	202561834	244	1q32.1	PPP1R12B	0.254	1	257	S1(4.6)	0
chr12	50898767	51142450	244	12q13.12	DIP2B	0.909	1	252	S1(5.1)	0
chr17	1963132	2207065	244	17p13.3	SMG6	1.419	1	259	S1(5.4)	0
chrX	71549365	71792953	244	Xq13.1	HDAC8	0.393	1	266	S1(4.5)	0
chr7	66460159	66704501	244	7q11.21	TYW1	0.171	0.995	258	S1(4.9)	0
chr3	111451343	111695364	244	3q13.2	PHLDB2	0.876	0.676	119	G1(5.5)	0
chr4	47596014	47840123	244	4p12	CORIN	0.011	0.056	20	S2(3.5)	0
chr6	150920998	151164799	244	6q25.1	PLEKHG1	0.007	0	0	S2(3.9)	0
chr12	124808960	125052135	243	12q24.31	NCOR2	1.701	1	249	S1(4.5)	0
chr9	35161998	35405335	243	9p13.3	UNC13B	0.277	1	261	S1(4.8)	0
chr17	58256454	58499831	243	17q23.1-2	USP32	1.533	0.879	236	S1(5.2)	0
chr7	139476849	139720125	243	7q34	TBXAS1	0.016	0.099	24	S3(3.4)	0
chr4	6322304	6565327	243	4p16.1	PPP2R2C	0.001	0	0	S3(3.4)	0
chr22	49808175	50051190	243	22q13.33	C22orf34	0	0	0	S3(2.9)	0
chr3	84687556	84930830	243	3p12.1	LINC00971	0	0	0	G2(1.3)	0
chr16	74088049	74330660	243	16q22-23	AC009120.4	0.007	0.12	106	S3(3.3)	0
chr3	73431583	73674091	243	3p13	PDZRN3	1.528	1	251	S2(4.2)	0
chr16	68877506	69119083	242	16q22.1	TANGO6	0.476	1	263	S1(5)	0
chr8	36394908	36636682	242	8p11-12	RP11-962G15.1	0	0	0	S3(3.2)	0
chr1	184356191	184598154	242	1q25.3	C1orf21	0.374	1	259	S1(4.5)	0
chr3	179512745	179754841	242	3q26.33	PEX5L	0	0	0	S3(2.7)	0
chr14	51955817	52197445	242	14q22.1	FRMD6	14.27	0.992	160	G1(5.6)	0
chr4	54325467	54567572	242	4q12	LNX1	0.003	0	0	S1(5.2)	0
chr10	118643741	118886097	242	10q25.3	KIAA1598	0.364	0.502	135	S3(2.9)	0
chr17	10286460	10527203	241	17p13.1	CTC-297N7.11	0.001	0.003	11	S4(2.3)	0
chr5	26880708	27121257	241	5p14.1	CDH9	0	0	0	G2(1.3)	0
chr12	15260716	15501609	241	12p12.3	RERG	0	0	0	S3(3.1)	0
chr2	189463517	189704171	241	2q32.2	AC079613.1	0.001	0	0	S2(4.4)	0
chr18	20777107	21017925	241	18q11.2	TMEM241	0.12	0.878	212	S1(5)	0
chr14	25278861	25519503	241	14q12	STXBP6	0.143	1	254	S3(3.4)	0
chr1	144836156	145076186	240	1q21.1	PDE4DIP	1.365	1	240	S1(5.4)	0
chr1	217804665	218045038	240	1q41	SPATA17	0.008	0	0	S4(2.2)	0
chr3	184529930	184770402	240	3q27.2	VPS8	0.645	1	257	S2(4.3)	0
chr2	171847332	172087824	240	2q31.1	TLK1	1.382	0.712	191	S1(5)	0
chr16	47495033	47735434	240	16q12.1	PHKB	0.764	1	299	S3(3.1)	0
chr2	98372798	98612388	240	2q11.2	TMEM131	1.375	1	265	S2(3.5)	0
chr16	72459383	72698908	240	16q22.2	AC004158.2	0.297	1	440	S3(3)	0.406	1		1
chr6	80816363	81055987	240	6q14.1	BCKDHB	0.53	1	250	S3(3.2)	0
chrX	44732756	44971847	239	Xp11.3	KDM6A	0.899	1	256	S2(3.6)	0
chr7	22157855	22396763	239	7p15.3	RAPGEF5	0.001	0	0	S3(3.4)	0
chr12	25562240	25801513	239	12p12.1	IFLTD1	0.036	0.802	193	S1(4.8)	0
chr15	100017369	100256671	239	15q26.3	MEF2A	0.911	0.632	170	S2(3.7)	0
chr9	43684901	43924049	239	9p11.2	CNTNAP3B	0	0	0	S4(1.5)	0
chr12	86993354	87232775	239	12q21.32	RP11-202H2.1	0	0	0	S4(1.7)	0
chr11	3875756	4114439	239	11p15.4	STIM1	0.773	1	240	S1(5)	0
chr12	18233802	18473041	239	12p12.3	RERGL	0.004	0	0	S4(2.4)	0
chr2	56374764	56613306	239	2p16.1	RP11-482H16.1	6.387	0.85	1085	S3(3)	0
chr3	47892181	48130769	239	3p21.31	MAP4	2.65	1	247	S1(5.3)	0
chr19	29777917	30016659	239	19q12	CTC-525D6.1	0	0	0	S4(2.4)	0
chr21	38123188	38362536	239	21q22.13	HLCS	0.645	1	259	S2(4.2)	0
chr4	147627789	147867034	239	4q31.22	TTC29	0.002	0	0	S3(2.6)	0
chr13	76194569	76434004	239	13q22.2	LMO7	10.968	0.992	236	S1(4.8)	0
chr1	37261127	37499730	239	1p34.3	GRIK3	0	0	0	S3(2.7)	0
chr8	16534413	16772553	238	8p22	RP11-13N12.1	0.001	0	0	S3(3.4)	0
chr4	121606073	121844025	238	4q27	PRDM5	0.614	1	370	S4(2.3)	0
chr5	127039081	127277326	238	5q23.2	CTC-228N24.1	0	0	0	S2(4.3)	0
chr18	5392382	5630699	238	18p11.31	EPB41L3	0	0	0	S4(1.9)	0
chr5	78293437	78531861	238	5q14.1	DMGDH	0.009	0.064	17	S2(4.1)	0
chr15	59427112	59665099	238	15q22.2	MYO1E	1.597	1	290	S1(4.7)	0
chr7	55086713	55324313	238	7p11.2	EGFR	3.434	0.832	199	S1(5)	0
chr9	37120535	37358146	238	9p13.2	ZCCHC7	0.798	1	303	S2(4.4)	0
chr15	48700502	48938046	238	15q21.1	FBN1	4.901	1	273	G1(5.6)	0
chr16	11038344	11276046	238	16p13.13	CLEC16A	0.641	1	264	S1(5.2)	0
chr8	6264112	6501144	237	8p23.1	MCPH1	0.465	1	240	S2(3.9)	0
chr22	18270414	18507325	237	22q11.21	MICAL3	1.324	1	251	S1(5.2)	0
chr11	5289581	5526847	237	11p15.4	HBE1	0.004	0	0	S3(3.1)	0
chr18	21742007	21977844	236	18q11.2	OSBPL1A	0.577	1	261	S2(4.2)	0
chr2	169983618	170219195	236	2q31.1	LRP2	0	0	0	S3(2.8)	0
chr6	151186684	151423023	236	6q25.1	MTHFD1L	2.192	1	297	S1(4.5)	0
chr6	78400374	78636691	236	6q14.1	MEI4	0	0	0	S4(2)	0
chr21	29811666	30047170	236	21q21.3	AF131217.1	0.186	1	446	S1(4.8)	0
chr6	2245981	2482256	236	6p25.2-3	GMDS-AS1	0.137	0.929	221	S2(3.5)	0
chr1	78769567	79005434	236	1p31.1	PTGFR	0.274	0.207	55	S2(4.2)	0
chr2	69240309	69476459	236	2p13.3	ANTXR1	1.921	1	306	S1(5)	0
chr6	154331630	154568001	236	6q25.2	OPRM1	0	0	0	S3(2.9)	0
chr11	16799841	17035990	236	11p15.1	PLEKHA7	0.01	0	0	S3(3.4)	0
chr1	48226199	48462567	236	1p33	TRABD2B	0	0	0	S4(2.1)	0
chr6	136878184	137113656	235	6q23.3	MAP3K5	0.763	1	245	S3(3.4)	0
chr5	178537851	178772431	235	5q35.3	ADAMTS2	1.955	1	262	S2(3.5)	0
chr13	73987609	74222390	235	13q22.1	LINC00393	0	0	0	S3(3.2)	0
chr16	64398683	64634150	235	16q21	RP11-467L24.1	0.003	0	0	S3(3.2)	0
chr1	169101768	169337205	235	1q24.2	NME7	0.321	1	262	S3(2.5)	0
chr8	135490030	135725292	235	8q24.22	ZFAT	0.469	1	266	S3(3.1)	0
chr14	61201459	61436671	235	14q23.1	MNAT1	1.258	1	403	S1(4.8)	0
chr9	102348067	102582171	234	9q22.33	RP11-554F20.1	0.091	1	249	S2(4.2)	0
chr8	109213444	109447562	234	8q23.1	EIF3E	0.41	0.227	68	S4(2.1)	0
chr12	19928384	20162871	234	12p12.2-3	RP11-405A12.2	0.005	0.021	5	S3(3.2)	0
chr18	20279443	20513727	234	18q11.2	RP11-739L10.1	0.018	0.24	57	S1(4.5)	0
chr3	162845710	163079351	234	3q26.1	CT64	0	0	0	G2(1.3)	0
chr13	38210772	38444562	234	13q13.3	TRPC4	1.663	1	273	S2(3.5)	0
chr10	125465722	125699783	234	10q26.13	CPXM2	0.987	0.798	202	S3(3.1)	0
chr13	49550047	49783915	234	13q14.2	FNDC3A	2.274	1	243	S1(4.7)	0
chr1	62920398	63153969	234	1p31.3	DOCK7	1.195	1	258	S2(4)	0
chr12	11090004	11324172	234	12p13.2	TAS2R14	1.252	1	363	S3(3)	0
chr13	73356196	73590591	234	13q22.1	PIBF1	0.625	1	274	S2(3.5)	0.073	1		1
chr16	87117167	87351022	234	16q24.2	C16orf95	0.295	1	477	S1(4.7)	0
chr6	145822718	146057160	234	6q24.3	EPM2A	0.114	0.587	138	S2(3.5)	0
chr2	71680851	71913898	233	2p13.2	DYSF	0.025	0.977	228	S2(4)	0
chr1	17066767	17299474	233	1p36.13	CROCC	0.1	0.335	84	S1(4.6)	0
chr8	25042237	25275598	233	8p21.2	DOCK5	4.157	1	264	S1(4.8)	0
chr1	29213602	29446553	233	1p35.3	EPB41	0.068	1	254	S1(5.1)	0
chr2	216476285	216708445	232	2q35	LINC00607	0.015	0.323	52	S1(5.1)	0
chrX	142372753	142604631	232	Xq27.3	GS1-256O22.5	0	0	0	G2(1.3)	0
chr11	86152149	86383678	232	11q14.2	ME3	0.29	1	259	G1(5.5)	0
chr11	62905338	63137190	232	11q12.3	SLC22A10	0	0	0	S2(3.7)	0
chr4	178366132	178598280	232	4q34.3	RP11-130F10.1	0.137	0.997	235	S2(3.5)	0
chr1	103342022	103574052	232	1p21.1	COL11A1	6.031	1	293	S2(3.7)	0
chr15	59157373	59389618	232	15q22.1-2	RNF111	0.545	0.492	118	S1(4.8)	0
chrX	71130937	71363424	232	Xq13.1	NHSL2	0.345	1	235	S1(4.7)	0
chr6	10748026	10979553	232	6p24.2	SYCP2L	0.119	0.572	133	S3(3.2)	0
chr6	168841830	169073984	232	6q27	SMOC2	0	0	0	S4(1.8)	0
chr7	92234234	92465908	232	7q21.2	CDK6	4.346	1	249	S1(4.7)	0
chr6	108616097	108847999	232	6q21	LACE1	0.293	1	242	S2(4)	0
chrY	15360258	15592553	232	Yq11.221	UTY	0.002	0	0	NULL	0
chr14	76961705	77193055	231	14q24.3	RP11-187O7.3	0.001	0	0	S2(3.6)	0
chr1	215179117	215410436	231	1q41	KCNK2	0.488	1	268	S1(4.7)	0
chr20	51872517	52103813	231	20q13.2	RP4-678D15.1	0	0	0	S2(3.7)	0
chr4	166794409	167025047	231	4q32.3	TLL1	0.001	0	0	S4(1.9)	0
chr15	36871811	37102449	231	15q14	C15orf41	0.931	1	294	S2(4.4)	0
chr2	2898819	3129798	231	2p25.3	AC019118.2	0.001	0	0	S3(2.7)	0
chr11	32133594	32364955	231	11p13	RP1-65P5.1	0	0	0	S3(3)	0
chr7	139246315	139477577	231	7q34	HIPK2	1.699	1	241	S3(3.4)	0
chr5	61601988	61833076	231	5q12.1	KIF2A	0.906	1	391	S3(2.5)	0
chr1	118496483	118727846	231	1p12	SPAG17	0.001	0	0	S2(4.3)	0
chr9	136627015	136857726	231	9q34.2	VAV2	0.915	1	253	S2(3.9)	0
chr9	21802634	22032985	230	9p21.3	RP11-145E5.5	0.798	0.796	145	S1(5.3)	0
chr11	7260008	7490273	230	11p15.4	SYT9	0	0	0	S3(3.1)	0
chr16	27561453	27791690	230	16p12.1	KIAA0556	0.472	1	240	S2(3.9)	0
chr5	12574968	12804475	230	5p15.2	CT49	0	0	0	S4(1.5)	0
chr2	88055473	88285309	230	2p11.2	RGPD2	0	0	0	S2(3.9)	0
chr2	133174146	133404132	230	2q21.2	GPR39	0.212	1	245	S3(3.1)	0
chr5	153570289	153800544	230	5q33.2	GALNT10	1.178	1	408	S2(4.3)	0
chr2	39663777	39892483	229	2p22.1	AC007246.3	0.256	1	303	S1(5.2)	0
chr2	56179292	56408787	229	2p16.1	RP11-481J13.1	0.001	0	0	S2(3.9)	0
chr11	109225811	109454633	229	11q22.3	RP11-708B6.2	0.002	0	0	S4(2.4)	0
chr3	69788585	70017488	229	3p13-14	MITF	0.528	1	238	S2(4.1)	0
chr11	112263840	112492452	229	11q23.1	RP11-65M17.3	0.003	0.016	126	S3(3.3)	0
chr4	129786075	130014764	229	4q28.2	SCLT1	0.687	1	231	S3(3)	0
chr18	4775052	5004536	229	18p11.31	RP11-172F10.1	0	0	0	S4(1.5)	0
chr6	147830062	148058683	229	6q24.3	SAMD5	0.128	1	765	S3(3.2)	0
chr11	46958239	47185936	228	11p11.2	C11orf49	0.423	1	242	G1(5.5)	0
chr3	150570270	150798513	228	3q25.1	CLRN1-AS1	0.001	0	0	S3(3.3)	0
chrX	18443702	18671749	228	Xp22.13	CDKL5	0.194	0.955	219	S3(2.6)	0
chr5	110847923	111075423	228	5q22.1	STARD4-AS1	0.054	1	236	S2(3.7)	0
chr1	155305058	155532598	228	1q22	ASH1L	1.153	1	240	S1(5.4)	0
chr18	20378223	20606451	228	18q11.2	RBBP8	0.127	0.412	102	S1(4.9)	0
chr7	96110937	96339203	228	7q21.3	SHFM1	0.272	0.38	92	S4(1.9)	0
chr1	53971909	54199877	228	1p32.3	GLIS1	1.448	1	246	S1(5.1)	0
chr10	94590934	94819250	228	10q23.33	EXOC6	0.204	0.927	218	S1(4.9)	0
chr2	175411868	175639555	228	2q31.1	AC018890.6	0.003	0.055	29	S1(5)	0
chr6	17759413	17987854	228	6p22.3	KIF13A	2.668	1	256	S1(5.1)	0
chr1	180244514	180472089	228	1q25.2-3	ACBD6	1.3	1	247	S1(4.7)	0
chr8	84824947	85052518	228	8q21.2	RP11-120I21.2	0	0	0	G2(1.3)	0
chr4	129213905	129440549	227	4q28.2	RP11-420A23.1	0.039	1	238	S1(4.8)	0
chr2	210636716	210864024	227	2q34	UNC80	0	0.007	31	S4(2.3)	0
chr12	85430091	85657002	227	12q21.31	LRRIQ1	0.001	0	0	S4(2)	0
chr10	16632609	16859527	227	10p13	RSU1	1.446	1	262	S2(4.2)	0
chr11	14665268	14892350	227	11p15.2	PDE3B	0.001	0	0	S2(4.1)	0
chr4	46250443	46477247	227	4p12	GABRA2	0	0	0	G2(1.4)	0
chr6	42192668	42419789	227	6p21.1	TRERF1	1.788	1	235	S1(5.1)	0
chr5	23951456	24178372	227	5p14.2	C5orf17	0	0.013	3	G2(1.3)	0
chr17	34581085	34808061	227	17q12	TBC1D3H	0	0	0	S2(3.5)	0
chr1	97561478	97788511	227	1p21.3	DPYD-AS1	0.001	0	0	S2(4)	0
chr2	199211552	199437305	226	2q33.1	PLCL1:2	0	0	0	S4(2)	0
chr15	45997275	46223267	226	15q21.1	RP11-718O11.1	0.04	0.877	198	S2(3.6)	0
chr14	55033814	55260033	226	14q22.2	SAMD4A	4.151	1	242	S1(5.1)	0
chr22	40806284	41032706	226	22q13.1-2	MKL1	2.033	1	257	S1(5.2)	0
chr2	98703578	98929762	226	2q11.2	VWA3B	0.001	0	0	S3(3.1)	0
chr18	25530929	25757410	226	18q12.1	CDH2	5.029	1	269	S3(3)	0
chr1	210111537	210337636	226	1q32.2	SYT14	1.253	1	297	S1(5.1)	0
chr5	147830594	148056798	226	5q32	HTR4	0	0	0	S3(3.4)	0
chr16	20944432	21170762	226	16p12.3	DNAH3	0	0	0	S2(4.4)	0
chr2	159313475	159539391	226	2q24.1	PKP4	0.911	1	229	S2(3.5)	0
chr1	92145901	92371892	226	1p22.1	TGFBR3	0.899	0.914	209	S1(5.2)	0
chr19	45582545	45808541	226	19q13.32	MARK4	0.573	0.805	127	S1(5.2)	0
chr8	117962511	118188953	226	8q24.11	SLC30A8	0.33	1	243	S2(3.7)	0
chr5	140165875	140391929	226	5q31.3	PCDHA1	0	0	0	S3(3.1)	0
chr17	906757	1132315	226	17p13.3	ABR	0.228	0.784	200	S1(5)	0
chr8	9413423	9639856	226	8p23.1	TNKS	1.309	1	242	S3(2.6)	0
chr7	134429002	134655479	226	7q33	CALD1	23.042	1	242	S1(5.2)	0
chr17	56833229	57058983	226	17q22	PPM1E	0.001	0	0	S3(3.4)	0
chr4	118954772	119179803	225	4q26	NDST3	0.001	0	0	S3(3.4)	0
chr15	63900816	64126141	225	15q22.31	HERC1	1.188	1	233	S1(5.2)	0
chr11	28129794	28355054	225	11p14.1	METTL15	1.045	1	245	S2(4.3)	0
chr2	73612885	73837920	225	2p13.1	ALMS1	0.428	1	260	S2(4)	0
chr7	19393156	19618229	225	7p21.1	AC007091.1	0.002	0	0	S3(2.8)	0
chr15	101840817	102065405	225	15q26.3	PCSK6	0	0	0	S2(4.1)	0
chr15	64752940	64978264	225	15q22.31	ZNF609	1.066	1	234	S1(5.3)	0
chr9	80037994	80263223	225	9q21.2	GNA14	0.007	0	0	S2(4)	0
chr1	44171494	44396831	225	1p34.1	ST3GAL3	1.073	1	227	G1(5.5)	0
chr11	17809594	18034709	225	11p15.1	SERGEF	0.328	0.999	236	S3(3.2)	0
chr12	132680923	132905935	225	12q24.33	GALNT9	0	0	0	S2(4.1)	0
chr7	115575201	115799950	225	7q31.2	TFEC	0.005	0	0	S1(4.5)	0
chr5	61699798	61924409	225	5q12.1	IPO11	0.732	1	391	S3(2.5)	0
chr3	97952494	98176742	224	3q11.2	RP11-325B23.2	0	0	0	S3(2.7)	0
chrX	27193036	27417114	224	Xp21.3	RP11-268G12.1	0	0	0	G2(1.4)	0
chr3	176361728	176585626	224	3q26.32	RP11-644C3.1	0.003	0	0	S4(2.4)	0
chr1	230193535	230417870	224	1q42.13	GALNT2	1.507	0.96	224	S3(2.7)	0
chr2	172640879	172864766	224	2q31.1	SLC25A12	0.31	0.937	149	S1(5.2)	0
chr6	131160486	131384462	224	6q23.1-2	EPB41L2	0.872	1	259	S1(4.8)	0
chr2	120517206	120741394	224	2q14.2	PTPN4	0.383	1	254	S2(4)	0
chr7	156461645	156685924	224	7q36.3	LMBR1	0.459	1	236	S3(3.1)	0
chr8	75512009	75735548	224	8q21.11	RP11-758M4.1	0.001	0	0	S3(3)	0
chr1	213224588	213448116	224	1q32.3	RPS6KC1	0.785	1	277	S3(3.1)	0
chr4	80822302	81046608	224	4q21.21	ANTXR2	1.154	0.772	209	S1(4.9)	0
chr22	48027422	48251349	224	22q13.31	RP11-191L9.4	0.001	0	0	S4(2.2)	0
chr10	28064114	28287977	224	10p12.1	ARMC4	0.383	0.98	228	S1(4.6)	0
chr12	45609769	45834187	224	12q12	ANO6	2.185	1	230	S2(3.6)	0
chr5	119799972	120023027	223	5q23.1	PRR16	2.437	1	318	S2(4.1)	0
chr1	235824340	236046940	223	1q42.3	LYST	1.08	1	234	S1(5.2)	0
chr5	142985192	143208337	223	5q31.3	CTB-57H20.1	0.002	0	0	S1(4.9)	0
chr2	45615818	45839304	223	2p21	SRBD1	0.501	1	266	S1(4.8)	0
chrX	50334646	50557302	223	Xp11.22	SHROOM4	0	0	0	S4(1.5)	0
chr12	51984049	52206648	223	12q13.13	SCN8A	1.541	1	228	S1(5.1)	0
chr12	118587605	118810750	223	12q24.23	TAOK3	1.048	1	237	S2(3.7)	0
chr4	152023902	152246784	223	4q31.3	SH3D19	0.912	1	232	S2(4.3)	0
chr16	89334037	89556969	223	16q24.3	ANKRD11	2.703	1	223	S1(5.2)	0
chr3	151961616	152183569	222	3q25.1-2	MBNL1	7.576	0.91	297	S1(4.8)	0
chr5	79950466	80172279	222	5q14.1	MSH3	0.767	1	291	S2(4)	0
chr2	161128661	161350305	222	2q24.2	RBMS1	4.35	1	222	S1(4.8)	0
chr1	208195586	208417665	222	1q32.2	PLXNA2	1.181	1	224	S1(4.5)	0
chr17	8924858	9147317	222	17p13.1	NTN1	0.002	0	0	S3(2.8)	0
chr15	52599479	52821247	222	15q21.2	MYO5A	1.026	1	233	S1(5.1)	0
chr1	64936427	65158741	222	1p31.3	CACHD1	0.335	1	238	S2(4)	0
chr3	33537736	33759848	222	3p22.3	CLASP2	0.635	1	278	S1(4.9)	0
chr18	59000814	59223006	222	18q21.33	CDH20	0	0	0	S2(3.6)	0
chr12	112597991	112819896	222	12q24.13	HECTD4	0.639	1	240	S1(5.4)	0
chr3	159945240	160167617	222	3q25.33	RP11-432B6.3	0.554	0.976	253	S1(5.1)	0
chr1	87380330	87602334	222	1p22.3	HS2ST1	0.312	1	225	S2(4)	0
chr8	55561552	55782463	221	8q12.1	RP11-56A10.1	0	0	0	S4(1.9)	0
chr1	65886247	66107242	221	1p31.3	LEPR	0.273	0.982	188	S1(4.5)	0
chr4	184020445	184241930	221	4q35.1	WWC2	2.111	1	254	S1(4.9)	0
chr8	95907994	96128683	221	8q22.1	NDUFAF6	0.247	1	238	S1(4.8)	0
chr12	42632248	42853517	221	12q12	PPHLN1	0.663	0.837	134	S2(3.8)	0
chr7	19958603	20180076	221	7p21.1	AC005062.2	0	0	0	S3(3)	0
chr7	115927433	116148595	221	7q31.2	CAV2	0.417	0.208	32	G1(5.6)	0
chr6	130465459	130686570	221	6q23.1	SAMD3	0.091	1	237	S1(4.6)	0
chr3	156543269	156763918	221	3q25.31	LEKR1	0.034	0.636	177	S1(5.2)	0
chr7	86273229	86494200	221	7q21.11-12	GRM3	0	0	0	S4(1.5)	0
chr4	87515467	87736324	221	4q21.3	PTPN13	1.428	1	238	S1(5)	0
chr6	83920107	84140797	221	6q14.2	ME1	0.678	1	238	S3(3.4)	0
chr7	34697850	34917944	220	7p14.3	NPSR1	0	0.014	3	S4(2.3)	0
chr9	128509623	128729656	220	9q33.3	PBX3	4.959	1	245	S1(4.9)	0
chr2	179694483	179914813	220	2q31.2	CCDC141	0	0	0	S3(2.8)	0
chrX	117031775	117251303	220	Xq24	KLHL13	0	0	0	S3(2.7)	0
chr9	134735493	134955295	220	9q34.13	MED27	1.168	1	231	S1(4.5)	0
chr14	87819413	88039366	220	14q31.3	RP11-594C13.1	0	0	0	S4(1.6)	0
chr1	146032647	146253110	220	1q21.1	WI2-3658N16.1	0.001	0.023	5	NULL	0
chr17	75276650	75496678	220	17q25.2-3	2014-09-09	3.066	1	242	S1(5.1)	0
chr11	21305282	21525745	220	11p15.1	CTD-2302A16.2	0	0	0	G2(1.4)	0
chr2	166326156	166545917	220	2q24.3	CSRNP3	0	0	0	S3(2.6)	0
chr16	81772701	81991899	219	16q23.3	PLCG2	0.021	0.707	155	S2(4.4)	0
chr2	199417918	199637080	219	2q33.1	AC019330.1	0.002	0	0	S4(1.9)	0
chrX	138808504	139027435	219	Xq27.1	ATP11C	0.788	0.95	253	S4(2.3)	0
chr4	170314425	170533780	219	4q33	NEK1	0.341	1	262	S1(5)	0
chr3	149235021	149454501	219	3q25.1	WWTR1	1.154	0.9	165	G1(5.5)	0
chr9	97861335	98079991	219	9q22.32	FANCC	0.409	1	235	S2(3.8)	0
chr5	76506273	76725632	219	5q13.3	PDE8B	0.009	0.023	5	S1(4.6)	0
chrX	22050558	22269427	219	Xp22.11	PHEX	0.058	1	224	S2(3.9)	0
chr6	135818488	136037193	219	6q23.3	LINC00271	0.026	0.361	80	S2(3.6)	0
chr9	2422701	2641395	219	9p24.2	RP11-125B21.2	0.019	0.512	112	S2(3.7)	0
chr11	103546721	103765999	219	11q22.3	RP11-563P16.1	0.002	0	0	S2(4.2)	0
chr10	132890653	133109984	219	10q26.3	TCERG1L	0	0	0	S4(1.6)	0
chr1	112313283	112531777	218	1p13.2	KCND3	0.001	0	0	S2(4.2)	0
chrX	62563105	62780951	218	Xq11.1	RP11-357C3.3	0.518	1	313	S3(2.5)	0
chr2	86730553	86948245	218	2p11.2	CHMP3	0.439	0.556	148	S3(3.1)	0
chr9	124329335	124547809	218	9q33.2	DAB2IP	0.376	0.862	192	S1(5.1)	0
chr9	17579079	17797127	218	9p22.2	SH3GL2	0.252	1	234	S3(3.3)	0
chr16	18027045	18245452	218	16p12.3	CTA-481E9.4	0	0	0	S3(2.5)	0
chr11	8714897	8932498	218	11p15.4	ST5	1.627	1	239	G1(5.5)	0
chr21	19641432	19858197	217	21q21.1	TMPRSS15	0	0	0	S4(1.5)	0
chr21	26212863	26430059	217	21q21.2	AP000235.2	0	0	0	S4(1.5)	0
chr13	42614175	42830714	217	13q14.11	DGKH	0.904	0.998	218	S1(4.9)	0
chr12	94071150	94288616	217	12q22	CRADD	0.516	1	268	S1(5.2)	0
chr5	140174443	140391929	217	5q31.3	PCDHA2	0	0	0	S3(3)	0
chr3	6190170	6407572	217	3p26.1	AC026167.1	0	0	0	G2(1.4)	0
chr10	117816443	118032979	217	10q25.3	GFRA1	0.021	1	219	S4(2.2)	0
chr10	114710008	114927437	217	10q25.2-3	TCF7L2	1.142	1	236	S2(4.3)	0
chr20	40030740	40247133	216	20q12	CHD6	1.303	1	223	S1(5)	0
chr6	97372604	97588630	216	6q16.1	KLHL32	0.001	0	0	S3(2.6)	0
chrX	33744624	33960397	216	Xp21.1	RP11-305F18.1	0	0	0	G2(1.3)	0
chr4	95373036	95589377	216	4q22.3	PDLIM5	4.058	1	246	S1(5)	0
chr9	121915735	122131745	216	9q33.1	BRINP1	0	0	0	S4(1.7)	0
chr5	68790039	69006341	216	5q13.2	GUSBP3	0	0	0	S1(4.8)	0
chr18	48872618	49088939	216	18q21.2	RP11-267C16.1	0.001	0.014	3	S4(2)	0
chr9	39072763	39288312	216	9p13.1	CNTNAP3	0	0	0	S4(1.5)	0
chrX	131351174	131566890	216	Xq26.2	RAP2C-AS1	0.178	0.998	264	S4(2)	0
chr6	146920100	147136598	216	6q24.3	ADGB	0.001	0	0	S3(3.3)	0
chr12	58959742	59175529	216	12q14.1	RP11-767I20.1	0.001	0	0	S2(4)	0
chr2	27994583	28210954	216	2p23.2	MRPL33	0.42	1	582	S1(5.3)	0
chr9	113127530	113342160	215	9q31.3	SVEP1	0.429	1	222	S1(5.2)	0
chr4	187207247	187422151	215	4q35.2	F11-AS1	0	0	0	S4(2)	0
chr2	86732790	86948245	215	2p11.2	RNF103-CHMP3	0.428	0.551	148	S3(3.1)	0
chr7	65670185	65885530	215	7q11.21	TPST1	0.757	1	260	S1(5.2)	0
chr4	153242409	153457253	215	4q31.3	FBXW7	0.978	1	216	S2(4.2)	0
chr1	66999065	67213982	215	1p31.3	SGIP1	7.694	1	224	S1(5)	0
chr1	41492871	41707826	215	1p34.2	SCMH1	1.026	1	220	S1(4.7)	0
chr5	60628099	60841997	214	5q12.1	ZSWIM6	1.654	1	230	S1(4.6)	0
chr8	88554213	88767946	214	8q21.3	AF121898.3	0.002	0	0	S4(2.3)	0
chr17	43699266	43913194	214	17q21.31	CRHR1	0.012	0.089	19	S2(4.3)	0
chr21	45917774	46131495	214	21q22.3	TSPEAR	0.001	0.019	4	S2(3.9)	0
chr6	135604669	135818914	214	6q23.3	AHI1	0.569	1	237	S2(4.3)	0
chr8	62413115	62627155	214	8q12.3	ASPH	7.398	1	237	S2(4.3)	0
chr3	94657015	94871353	214	3q11.2	LINC00879	0	0	0	G2(1.4)	0
chr22	31089768	31303811	214	22q12.2	OSBP2	0.038	1	216	S1(4.7)	0
chr22	26565439	26779562	214	22q12.1	SEZ6L	0	0	0	S3(3.4)	0
chr3	105374304	105588396	214	3q13.11	CBLB	1.123	1	234	S2(3.9)	0
chr4	100010007	100222513	213	4q23	RP11-696N14.1	0.081	1	222	S2(3.7)	0
chr2	54683421	54896812	213	2p16.2	SPTBN1	2.231	1	235	S1(4.7)	0
chr4	106603783	106817143	213	4q24	INTS12	0.11	0.125	29	S3(2.8)	0
chr8	5901874	6115058	213	8p23.2	RP11-124B13.1	0	0	0	S3(2.6)	0
chr7	22459062	22672544	213	7p15.3	STEAP1B	0.008	0	0	S1(4.7)	0
chr12	3490514	3703139	213	12p13.32	PRMT8	0	0	0	S2(3.5)	0
chr6	111981534	112194655	213	6q21	FYN	0.767	1	268	S1(5.2)	0
chr3	238278	451090	213	3p26.3	CHL1	0	0	0	G2(1.4)	0
chr17	411907	624957	213	17p13.3	VPS53	0.902	1	329	S1(5)	0
chr4	105828513	106041157	213	4q24	RP11-556I14.1	0.001	0	0	S3(2.5)	0
chr2	69688531	69901481	213	2p13.3	AAK1	2.084	0.859	207	S1(5.4)	0
chr15	37181405	37393504	212	15q14	MEIS2	3.833	1	214	S2(4.4)	0
chr3	42055293	42267381	212	3p22.1	TRAK1	2.481	1	226	S2(4.2)	0
chr7	36552455	36764154	212	7p14.2	AOAH	0	0	0	S3(3.3)	0
chr10	31109135	31320866	212	10p11.22-23	ZNF438	0.395	0.965	205	S1(5)	0
chr1	52042850	52254889	212	1p32.3	OSBPL9	0.998	0.813	177	G1(5.5)	0
chr18	12446510	12658133	212	18p11.21	SPIRE1	0.939	1	231	S1(5.1)	0
chr2	203879601	204091101	212	2q33.2	NBEAL1	0.844	1	224	S1(4.7)	0
chr12	93397190	93609455	212	12q22	RP11-511B23.2	0.002	0	0	S1(5.1)	0
chr15	49447852	49660066	212	15q21.1-2	GALK2	0.783	1	269	S1(4.8)	0
chr5	140180782	140391929	211	5q31.3	PCDHA3	0	0	0	S3(3)	0
chr5	17065706	17276943	211	5p15.1	BASP1	0.735	0.57	131	G1(5.6)	0
chr3	171318194	171528740	211	3q26.31	PLD1	0.213	1	221	S1(4.9)	0
chr15	28356185	28567298	211	15q13.1	HERC2	0.503	1	223	S3(2.5)	0
chr1	163080910	163291577	211	1q23.3	RGS5	0.147	0.964	204	S1(4.9)	0
chr21	23582257	23793139	211	21q21.1	AP000705.7	0	0	0	S4(1.5)	0
chr8	58506724	58717588	211	8q12.1	RP11-388G22.1	0	0	0	S3(3.2)	0
chr5	130759613	130970929	211	5q31.1	RAPGEF6	0.969	1	441	S2(3.7)	0
chr4	157681605	157892546	211	4q32.1	PDGFC	3.691	1	240	S1(4.6)	0
chrX	96686284	96897588	211	Xq21.33	DIAPH2-AS1	0.035	0.473	100	S3(3.3)	0.508	1		1
chr8	65500319	65711318	211	8q12.3	CYP7B1	0	0	0	S4(1.5)	0
chr10	103605355	103815950	211	10q24.32	C10orf76	0.827	1	212	S1(5.4)	0
chr10	31607423	31818742	211	10p11.22	ZEB1	2.07	1	226	S1(4.9)	0
chr6	128029216	128239776	211	6q22.33	THEMIS	0.001	0	0	S2(4.3)	0
chr5	118373466	118584833	211	5q23.1	DMXL1	0.466	0.848	199	S2(3.8)	0
chr15	81952822	82163466	211	15q25.2	RP11-499F3.2	0	0	0	S3(2.6)	0
chr9	90112142	90323548	211	9q21.33	DAPK1	0.01	0.048	27	S2(3.7)	0
chr10	49654076	49864310	210	10q11.22	ARHGAP22	2.367	1	233	S2(3.6)	0
chr3	105085752	105295744	210	3q13.11	ALCAM	3.677	1	234	S2(3.7)	0
chr2	131594488	131804836	210	2q21.1	ARHGEF4	0.005	0.063	14	S3(2.6)	0
chr8	58907067	59116838	210	8q12.1	FAM110B	0	0	0	S2(3.8)	0
chr4	123073487	123283913	210	4q27	KIAA1109	0.901	1	214	S2(3.5)	0
chr2	67313577	67523207	210	2p14	AC023115.2	0.006	0.086	18	S2(4.2)	0
chr12	65672422	65882024	210	12q14.3	MSRB3	2.388	1	216	G1(5.5)	0
chr12	3186520	3395730	209	12p13.32-33	TSPAN9	0.499	1	247	S1(5)	0
chr12	31535156	31744031	209	12p11.21	DENND5B	0.71	1	223	S2(4)	0
chrX	34224841	34433654	209	Xp21.1	RP11-545D19.1	0	0	0	S4(1.8)	0
chr15	34671268	34880704	209	15q14	GOLGA8A	0.029	0.756	101	S1(4.6)	0
chr5	78073031	78281910	209	5q14.1	ARSB	0.277	1	227	S1(4.9)	0
chr7	87133174	87342611	209	7q21.12	ABCB1	0.02	0.465	98	S4(2.4)	0
chr10	21823093	22032559	209	10p12.31	MLLT10	1.863	1	231	S2(4.3)	0
chr7	38762562	38971994	209	7p14.1	VPS41	0.708	0.893	214	S4(2.4)	0
chr4	23562545	23770275	208	4p15.2	RP11-380P13.1	0	0	0	S4(2.2)	0
chr15	62144587	62352672	208	15q22.2	VPS13C	0.795	1	221	S3(3.3)	0
chr14	71374121	71582099	208	14q24.2	PCNX	1.57	1	234	S1(4.9)	0
chr5	60240955	60448853	208	5q12.1	NDUFAF2	0.522	1	218	S2(3.8)	0
chr4	40425271	40632892	208	4p14	RBM47	0.107	1	214	S2(4.3)	0
chr12	76745576	76953589	208	12q21.2	OSBPL8	1.471	1	212	S1(4.9)	0
chr6	136663874	136871957	208	6q23.3	MAP7	0.007	0.007	245	S3(3.4)	0
chr14	27067617	27275673	208	14q12	NOVA1-AS1	0	0	0	G2(1.4)	0
chr15	77905368	78113242	208	15q24.3	LINGO1	0	0	0	S2(4.4)	0
chr18	41903400	42111662	208	18q12.3	CTC-782O7.1	0.001	0	0	S2(3.7)	0
chr6	485132	693117	208	6p25.3	EXOC2	0.94	1	221	S3(3.2)	0
chr5	63461670	63668696	207	5q12.3	RNF180	0.003	0	0	S3(2.5)	0
chr3	72084450	72291716	207	3p13	LINC00877	0.001	0	0	S2(3.5)	0
chr2	215796265	216003151	207	2q35	ABCA12	0.003	0	0	S3(2.8)	0
chr3	149478891	149686172	207	3q25.1	ANKUB1	0.287	0.22	49	S1(5.1)	0
chrX	16964813	17171395	207	Xp22.13-2	REPS2	0.001	0	0	S2(3.8)	0
chr8	121925304	122131994	207	8q24.12	RP11-369K17.1	0	0	0	S2(4.4)	0
chr1	167190065	167396582	207	1q24.1-2	POU2F1	0.566	0.998	214	S3(2.7)	0
chr4	105412121	105618749	207	4q24	AC004053.1	0	0	0	S4(1.5)	0
chr10	76585339	76792380	207	10q22.2	KAT6B	1.501	0.999	214	S1(5.2)	0
chr7	124812271	125019375	207	7q31.33	RP11-3B12.2	0.002	0.02	184	G2(1.4)	0
chr5	38258510	38465123	207	5p13.1-2	EGFLAM	0	0	0	S2(4.4)	0
chr13	110958158	111165374	207	13q34	COL4A2	1.957	1	216	S1(5)	0
chr8	1449531	1656642	207	8p23.3	DLGAP2	0	0	0	S3(3.2)	0
chr7	76751750	76958850	207	7q11.23	CCDC146	0.084	1	389	S1(4.9)	0
chr11	34172534	34379555	207	11p13	ABTB2	0.293	1	211	S1(5)	0
chr11	44748014	44953972	206	11p11.2	TSPAN18	0	0	0	S2(3.8)	0
chr2	175664090	175870097	206	2q31.1	CHN1	0.471	1	211	S1(5)	0
chr12	119772516	119978852	206	12q24.23	CCDC60	0	0	0	S4(2.3)	0
chr4	87856153	88062206	206	4q21-22	AFF1	1.097	1	232	S1(5.1)	0
chr3	156893011	157099054	206	3q25.31-32	RP11-550I24.2	0.056	1	262	S1(5.4)	0
chr3	162744183	162949937	206	3q26.1	RP11-10O22.1	0	0	0	G2(1.3)	0
chr3	185000728	185206885	206	3q27.2	MAP3K13	0.256	1	210	S2(4.3)	0
chr16	80631802	80838226	206	16q23.2	CDYL2	0.877	1	232	S2(3.6)	0
chr6	110931180	111137161	206	6q21	CDK19	0.837	1	232	S1(5)	0
chr7	75162620	75368280	206	7q11.23	HIP1	0.461	1	211	S1(5.4)	0
chr7	68689682	68895909	206	7q11.22	RP11-3P22.2	0	0	0	S4(1.6)	0
chr19	5993174	6199583	206	19p13.3	RFX2	0.312	0.666	133	S1(4.8)	0
chr10	15555947	15762124	206	10p13	ITGA8	0.016	0.611	126	S2(4.2)	0
chr13	35009586	35214822	205	13q13.2	LINC00457	0	0	0	S3(3.3)	0
chr5	140186658	140391929	205	5q31.3	PCDHA4	0	0	0	S3(3)	0
chr7	87256863	87461611	205	7q21.12	RUNDC3B	0.022	1	207	S4(2.3)	0
chr9	27325206	27529779	205	9p21.2	MOB3B	0.002	0	0	S4(2.2)	0
chr7	140419126	140624564	205	7q34	BRAF	0.965	1	233	S2(4)	0
chr2	179059207	179264160	205	2q31.2	OSBPL6	0.415	1	207	S2(4)	0
chr3	141663276	141868386	205	3q23	TFDP2	0.355	1	231	S1(4.8)	0
chr3	110788917	110994410	205	3q13.13	PVRL3	2.296	1	224	S2(3.8)	0
chr13	113548691	113754053	205	13q34	MCF2L	0	0	0	S2(4.1)	0
chrY	21034386	21239302	205	Yq11.222	TTTY14	0.387	1	239	NULL	0
chr4	37245841	37451087	205	4p14	KIAA1239	0	0	0	S4(1.7)	0
chr5	131142682	131347936	205	5q31.1	ACSL6	0	0	0	S1(4.5)	0
chr7	128864863	129070052	205	7q32.1	AHCYL2	0.208	1	210	S1(5)	0
chr5	41307055	41510730	204	5p13.1	PLCXD3	0.232	1	210	S3(3)	0
chr6	75239963	75443995	204	6q13	RP11-554D15.3	0.007	0.24	49	S2(4)	0
chr7	90940682	91144724	204	7q21.13-2	RP11-115N4.1	0.001	0	0	S2(3.9)	0
chr1	214522038	214725792	204	1q41	PTPN14	3.013	1	226	S1(5.3)	0
chr8	25699245	25902913	204	8p21.2	EBF2	0.004	0	0	S2(3.8)	0
chr1	201592410	201796102	204	1q32.1	NAV1	3.28	1	206	S1(5.4)	0
chr1	52608045	52812358	204	1p32.3	ZFYVE9	0.361	1	228	S1(5.1)	0
chr14	100204029	100408397	204	14q32.2	EML1	0.382	1	227	S1(5.2)	0
chr1	23037331	23241818	204	1p36.12	EPHB2	0.047	0.999	206	S1(5)	0
chr1	177362422	177566844	204	1q25.2	RP1-35C21.2	0.001	0	0	S4(2.4)	0
chr1	217600333	217804424	204	1q41	GPATCH2	1.02	1	220	S4(2.2)	0
chr20	47240789	47444420	204	20q13.13	PREX1	0.07	1	208	S1(4.7)	0
chr11	77926342	78129394	203	11q14.1	GAB2	0.831	1	211	S1(5)	0
chr9	70943223	71145977	203	9q21.11	PGM5	0.217	0.865	185	S3(2.7)	0
chr9	137533619	137736686	203	9q34.3	COL5A1	1.837	1	218	S1(4.8)	0
chr7	119344609	119547429	203	7q31.31	RP11-328J2.1	0	0	0	S4(1.5)	0
chr10	12938626	13141652	203	10p13	CCDC3	0.006	0.099	22	S3(3.2)	0
chr15	94448633	94651167	203	15q26.2	CTD-2643K12.3	0	0	0	S3(2.7)	0
chr5	66995256	67198428	203	5q13.1	RP11-83M16.6	0	0	0	S3(3.3)	0
chr5	125412492	125615493	203	5q23.2	RP11-114J13.1	0.017	0.606	199	S2(4.4)	0
chr2	104490767	104694236	203	2q12.1	RP11-76I14.1	0	0	0	G2(1.4)	0
chrX	14547419	14749934	203	Xp22.2	GLRA2	0.002	0	0	S2(4)	0
chr2	218664511	218867718	203	2q35	TNS1	1.502	1	250	S1(4.9)	0
chr18	22305744	22509040	203	18q11.2	RP11-449D8.5	0	0	0	S2(4)	0
chrX	8496914	8700227	203	Xp22.31	KAL1	0	0	0	S3(3)	0
chr7	50657759	50861159	203	7p12.1	GRB10	0.484	1	204	S3(3.3)	0
chr10	103113819	103317078	203	10q24.32	BTRC	0.721	1	217	S1(4.5)	0
chr4	59646790	59849870	203	4q13.1	RP11-506N2.1	0	0	0	G2(1.4)	0
chr3	194789007	194991896	203	3q29	XXYLT1	0.609	1	211	S2(4.1)	0
chr18	67671028	67873181	202	18q22.2	RTTN	0.686	1	328	S2(4.3)	0
chr6	154475630	154677926	202	6q25.2	IPCEF1	0.012	0.145	184	S2(3.5)	0
chr11	8413417	8615836	202	11p15.4	STK33	0.046	1	206	S1(4.5)	0
chr2	56411257	56613308	202	2p16.1	CCDC85A	7.512	1	1085	S3(3)	0
chr6	76001574	76203454	202	6q14.1	FILIP1	0.002	0	0	S1(5.4)	0
chr3	57327726	57530071	202	3p14.3	DNAH12	0.006	0.037	61	S2(4.2)	0
chr6	34857041	35059179	202	6p21.31	ANKS1A	0.495	1	217	S1(5.1)	0
chr2	200134222	200335989	202	2q33.1	SATB2	0.365	0.943	207	S3(2.8)	0
chr20	10415950	10617477	202	20p12.2	SLX4IP	0.411	1	319	S2(4.1)	0
chr7	95749531	95951459	202	7q21.3	SLC25A13	0.81	1	217	S4(2.2)	0
chr15	56536206	56738195	202	15q21.3	TEX9	0.022	0.52	99	S2(3.8)	0
chr11	30406039	30608419	202	11p14.1	MPPED2	0	0	0	S4(1.6)	0
chr18	24034873	24237365	202	18q11.2	KCTD1	0.305	0.467	97	S3(3)	0
chr9	102861537	103063282	202	9q31.1	INVS	0.534	1	307	S2(4.1)	0
chr17	12692855	12894960	202	17p12	ARHGAP44	0.025	1	205	S3(3.1)	0
chrX	57313138	57515629	202	Xp11.21	FAAH2	0.01	0	0	S4(1.8)	0
chr2	228844665	229046361	202	2q36.3	SPHKAP	0.702	1	218	S3(3)	0
chr15	91643179	91844539	201	15q26.1	SV2B	0	0	0	S2(3.7)	0
chr10	90973325	91174314	201	10q23.31	LIPA	0.484	1	209	G1(5.6)	0
chr9	36833271	37034103	201	9p13.2	PAX5	0	0	0	S2(4.1)	0
chr2	211342405	211543831	201	2q34	CPS1	0.07	1	211	S4(1.5)	0
chr11	5326205	5526882	201	11p15.4	AC104389.28	0.004	0	0	S3(3.1)	0
chr9	127704886	127905785	201	9q33.3	SCAI	0.336	1	282	S1(5.4)	0
chr6	90142888	90343553	201	6q15	ANKRD6	0.002	0	0	S3(3)	0
chr3	68780916	68981761	201	3p14.1	FAM19A4	0	0	0	S3(2.9)	0
chr13	47127302	47327175	200	13q14.13-2	LRCH1	1.247	1	211	S2(3.9)	0
chr15	96670597	96870590	200	15q26.2	NR2F2-AS1	0.286	1	258	S2(3.8)	0
chr16	65266958	65466723	200	16q21	RP11-256I9.3	0	0	0	S2(4.1)	0
chr12	97379433	97579387	200	12q23.1	RP11-541G9.1	0.001	0	0	S3(3.2)	0
chr7	29034846	29235067	200	7p14.3	CPVL	0	0	0	S4(2.4)	0
chr3	16355080	16555533	200	3p24-25	RFTN1	1.174	1	228	S1(5)	0
chr14	92047039	92247051	200	14q32.12	CATSPERB	0.002	0	0	S2(3.5)	0
chr4	111286888	111486441	200	4q25	ENPEP	0	0	0	S3(3.3)	0
chr6	96463859	96663488	200	6q16.1	FUT9	0	0	0	G2(1.4)	0
chr21	19933582	20132321	199	21q21.1	AL109763.2	0	0	0	S4(1.5)	0
chr6	158733691	158932860	199	6q25.3	TULP4	0.906	1	223	S1(5.1)	0
chr14	39218544	39417477	199	14q21.1	LINC00639	0.004	0.04	34	S2(3.6)	0
chr11	10329859	10529126	199	11p15.4	AMPD3	0.249	0.829	153	G1(5.6)	0
chr8	136469699	136668965	199	8q24.23	KHDRBS3	0.573	1	213	S4(2.3)	0
chr10	54316461	54515169	199	10q21.1	RP11-556E13.1	0	0	0	S1(4.6)	0
chr16	59889256	60087875	199	16q21	RP11-430C1.1	0	0	0	S4(2.2)	0
chr13	39261265	39460074	199	13q13.3	FREM2	0	0	0	S4(2.2)	0
chr7	141607612	141806547	199	7q34	MGAM	0	0	0	S4(2.1)	0
chr6	11183530	11382581	199	6p24.2	NEDD9	0.258	0.276	59	S2(4.1)	0
chr7	113516831	113715975	199	7q31.1	PPP1R3A	0	0	0	S4(1.9)	0
chr2	9346893	9545812	199	2p25.1	ASAP2	1.935	1	217	S1(5.3)	0
chr1	152140600	152339163	199	1q21.3	FLG-AS1	0.01	0.126	25	S3(3.4)	0
chr6	109814058	110012420	198	6q21	AK9	0.008	0.307	62	S2(3.7)	0
chr11	46417963	46615675	198	11p11.2	AMBRA1	1.214	1	208	G1(5.5)	0
chrX	133699867	133898352	198	Xq26.3	PLAC1	0.005	0.115	57	G1(5.5)	0
chr2	192711264	192908909	198	2q32.3	AC098617.1	0.002	0	0	S2(4.2)	0
chr1	77333125	77531396	198	1p31.1	ST6GALNAC5	0.477	1	201	S2(3.8)	0
chr2	102313311	102511149	198	2q11.2	MAP4K4	3.467	1	221	S1(4.8)	0
chr18	976589	1174824	198	18p11.32	RP11-78F17.1	0	0	0	S3(3.3)	0
chr1	161736083	161933860	198	1q23.3	ATF6	0.833	1	216	S1(5)	0
chr4	104177315	104374815	198	4q24	RP11-328K4.1	0	0	0	S3(2.6)	0
chr11	73111531	73309234	198	11q13.4	FAM168A	0.618	1	202	S1(5.3)	0
chr12	43747668	43945724	198	12q12	ADAMTS20	0	0	0	S2(3.7)	0
chr4	10488018	10686489	198	4p16.1	CLNK	0.002	0.055	11	S3(3.2)	0
chr10	7860466	8058590	198	10p14	TAF3	0.51	1	202	S2(3.5)	0
chr5	173472606	173670504	198	5q35.2	NSG2	0.001	0	0	S3(2.7)	0
chr2	208693026	208890284	197	2q33.3	PLEKHM3	0.513	1	204	S3(3.4)	0
chr22	17840836	18037850	197	22q11.1-21	CECR2	0	0	0	S2(4.2)	0
chr5	139226363	139422884	197	5q31.2	NRG2	0.008	0	0	S1(4.7)	0
chr2	176121977	176319368	197	2q31.1	AC096649.3	0	0	0	S3(2.8)	0
chr15	25295778	25492435	197	15q11.2	SNHG14:2	0.198	0.507	196	S4(2.1)	0
chr2	242823513	243020873	197	2q37.3	AC131097.3	0.076	0.628	124	S2(3.9)	0
chr5	35617945	35814713	197	5p13.2	SPEF2	0.035	0.425	85	S2(4.3)	0
chr16	14529557	14726585	197	16p13.12	PARN	0.766	1	216	S1(5.2)	0
chr1	235294948	235491534	197	1q42.3	ARID4B	1.35	1	200	S1(5.2)	0
chr3	47626761	47823596	197	3p21.31	SMARCC1	0.867	1	204	S1(5.1)	0
chr18	11688954	11885684	197	18p11.21	GNAL	0.072	0.102	20	S2(3.6)	0
chr2	30670091	30867091	197	2p23.1	LCLAT1	0.898	1	278	S2(3.6)	0
chr13	113344642	113541482	197	13q34	ATP11A	0.256	1	198	S3(3.3)	0
chr20	24449834	24647252	197	20p11.21	SYNDIG1	0	0	0	S3(2.9)	0
chr3	124801479	124998021	197	3q21.2	SLC12A8	0.606	0.771	187	G1(5.5)	0
chr15	71145577	71342414	197	15q23	LRRC49	0.211	1	244	G1(5.6)	0
chr18	60790578	60987361	197	18q21.33	BCL2	0.118	1	197	S2(3.7)	0
chr15	91951937	92148441	197	15q26.1	RP11-661P17.1	0.001	0	0	S4(2)	0
chr13	75858807	76056250	197	13q22.2	TBC1D4	0.715	1	212	S1(4.7)	0
chr19	20236185	20432114	196	19p12	CTC-260E6.6	0.018	0.23	45	S4(2.2)	0
chr11	41540444	41735998	196	11p12	RP11-124G5.3	0	0	0	G2(1.4)	0
chr17	53046087	53241646	196	17q22	STXBP4	0.257	1	200	S3(2.7)	0
chr7	11013498	11209250	196	7p21.3	PHF14	0.502	1	245	S4(1.7)	0
chr10	74451888	74647452	196	10q22.1	MCU	1.108	1	208	S1(5.1)	0
chr8	28924795	29120641	196	8p12	KIF13B	0.073	1	198	S1(4.8)	0
chr6	40359324	40555204	196	6p21.1-2	LRFN2	0	0	0	S4(2.2)	0
chr9	77112280	77308093	196	9q21.13	RORB	0	0	0	S4(2)	0
chr10	67330095	67526299	196	10q21.3	RP11-222A11.1	0.086	1	244	G2(1.4)	0
chr10	63661058	63856703	196	10q21.2	ARID5B	6.225	1	295	S1(5.3)	0
chr7	101006100	101202304	196	7q22.1	COL26A1	0	0	0	S1(4.8)	0
chr5	106150897	106346715	196	5q21.3	CTC-254B4.1	0	0	0	S4(1.6)	0
chr14	35591051	35786680	196	14q13.2	KIAA0391	0.706	1	216	S1(5.2)	0
chrX	44007127	44202918	196	Xp11.3	EFHC2	0.003	0.015	3	S3(2.5)	0
chr5	173763297	173959460	196	5q35.2	RP11-267A15.1	0.001	0	0	S4(2.4)	0
chr17	44107281	44302733	195	17q21.31	KANSL1	2.164	0.999	213	S1(4.9)	0
chr1	178694299	178889238	195	1q25.2	RALGPS2	1.97	1	219	S1(5)	0
chr7	143339347	143534026	195	7q35	RP11-61L23.2	0.004	0.367	63	S2(4.3)	0
chr17	43699273	43893909	195	17q21.31	RP11-105N13.4	0.013	0.098	19	S2(4.3)	0
chr2	36583068	36778278	195	2p22.2-3	CRIM1	25.058	1	222	S1(5)	0
chr14	86401053	86596117	195	14q31.3	CTD-2341M24.1	0	0	0	S4(2.1)	0
chr1	71318035	71513491	195	1p31.1	PTGER3	0.001	0	0	S3(2.5)	0
chr3	58810162	59004819	195	3p14.2	RP11-147N17.1	0	0	0	S3(3.2)	0
chr13	28874488	29069265	195	13q12.2-3	FLT1	1.201	1	233	S1(5.2)	0
chr5	76721794	76916436	195	5q13-14	WDR41	0.303	0.348	73	S2(4)	0
chr11	94278495	94473521	195	11q21	RP11-867G2.8	0.008	0	7	S1(4.9)	0
chr16	14165177	14360630	195	16p13.12	MKL2	0.645	1	207	S1(4.8)	0
chr9	108006902	108201452	195	9q31.1-2	SLC44A1	0.759	1	205	S1(4.9)	0
chr9	88161454	88356944	195	9q21.33	AGTPBP1	0.252	1	211	S4(2)	0
chr10	112404154	112599227	195	10q25.2	RBM20	0.002	0	0	S2(4.4)	0
chr2	136289024	136482840	194	2q21.3	R3HDM1	0.617	1	211	S2(3.9)	0
chr5	146967989	147162338	194	5q32	JAKMIP2	0	0	0	S2(4.1)	0
chr3	139108656	139302161	194	3q23	RP11-319G6.1	0.082	0.676	132	S3(3.2)	0
chr15	80696691	80890278	194	15q25.1	ARNT2	0.39	1	204	S1(5.4)	0
chr7	74112304	74306731	194	7q11.23	STAG3L2	0.008	0.391	76	S1(5.4)	0
chr6	71377478	71571718	194	6q13	SMAP1	0.724	1	203	S3(2.9)	0
chr1	102268129	102462586	194	1p21.1	OLFM3	0.002	0	0	S4(1.7)	0
chr1	204797778	204991950	194	1q32.1	NFASC	0.158	1	196	S1(4.6)	0
chr4	7967038	8160559	194	4p16.1	ABLIM2	0.001	0	0	S1(5.1)	0
chr6	143072603	143266338	194	6q24.2	HIVEP2	1.356	1	198	S1(4.7)	0
chr8	70378858	70573150	194	8q13.2-3	SULF1	5.284	1	208	S3(3.4)	0
chr8	123793632	123986750	193	8q24.13	ZHX2	0.429	1	198	S1(4.5)	0
chr3	15708742	15901278	193	3p25.1	ANKRD28	3.546	1	231	S1(5.3)	0
chr2	32853098	33046118	193	2p22.3	TTC27	0.545	1	210	S1(4.6)	0
chr8	67579830	67772707	193	8q13.1	C8orf44-SGK3	0.455	1	204	S1(5)	0
chr6	149539776	149732749	193	6q25.1	TAB2	0.988	0.488	110	S1(4.6)	0
chrX	73952683	74145282	193	Xq13.3	KIAA2022	0	0	0	S3(2.6)	0
chr16	16043433	16236931	193	16p13.11	ABCC1	1.605	1	211	S1(5.1)	0
chr2	173940162	174132738	193	2q31.1	MLTK	1.84	1	202	S1(5.1)	0
chr4	139741107	139933800	193	4q31.1	RP11-371F15.3	0.025	0.64	288	S2(4.2)	0
chr15	64472546	64665980	193	15q22.31	CTD-2116N17.1	0.956	1	225	S1(5.4)	0
chr16	76770238	76962066	192	16q23.1	CTD-2336H13.2	0	0	0	S4(1.5)	0
chr11	45950870	46142985	192	11p11.2	PHF21A	0.932	1	203	S1(4.9)	0
chr8	77403434	77595513	192	8q21.11	ZFHX4-AS1	0	0	0	S3(3.2)	0
chr2	49189295	49381676	192	2p16.3	FSHR	0	0	0	G2(1.4)	0
chr11	32623791	32816204	192	11p13	CCDC73	0	0	0	S2(3.8)	0
chr12	120123594	120315095	192	12q24.23	CIT	1.443	1	208	S2(4.2)	0
chr16	77822426	78014004	192	16q23.1	VAT1L	0.434	1	204	S4(1.9)	0
chr12	29302035	29493913	192	12p11.22	FAR2	0.276	1	221	S3(3.4)	0
chr2	233924676	234116549	192	2q37.1	INPP5D	0.001	0	0	S3(3.4)	0
chr4	175558064	175750465	192	4q34.1	GLRA3	0.001	0	0	S4(2.2)	0
chr8	128302061	128494384	192	8q24.21	CASC8	0.001	0.033	9	S2(4.1)	0
chr15	93160672	93353114	192	15q26.1	FAM174B	0.094	1	214	S2(4.2)	0
chr8	69824037	70016425	192	8q13.2	RP11-600K15.1	0.026	0.618	67	S2(4)	0
chr13	33160563	33352157	192	13q13.1	PDS5B	0.906	1	219	S2(4.4)	0
chr1	169631244	169823221	192	1q24.2	C1orf112	0.105	0.316	83	S3(3.3)	0
chr15	64457715	64648442	191	15q22.31	CSNK1G1	1.02	1	225	S1(5.4)	0
chr3	193119865	193310900	191	3q29	ATP13A4	0.002	0	0	S4(2.1)	0
chr17	80709939	80900724	191	17q25.3	TBCD	0.754	1	209	S1(4.6)	0
chr15	57884230	58074960	191	15q21.3	POLR2M	0.18	1	195	S1(4.6)	0
chr13	111766905	111958084	191	13q34	ARHGEF7	1.383	0.798	171	S3(3.3)	0
chr16	15528151	15718885	191	16p13.11	C16orf45	1.15	1	210	S1(4.9)	0
chr6	47845763	48036425	191	6p12.3	PTCHD4	0.442	1	271	S4(2.3)	0
chr19	28284395	28475892	191	19q11	LLNLF-65H9.1	0.108	0.57	110	S4(1.9)	0
chr2	203241658	203432474	191	2q33.1-2	BMPR2	1.235	1	238	S1(4.9)	0
chr19	2511216	2702707	191	19p13.3	GNG7	0.023	1	193	S1(5.2)	0
chr5	140201221	140391929	191	5q31.3	PCDHA5	0	0	0	S3(3)	0
chr14	81421332	81612646	191	14q31.1	TSHR	0	0	0	S3(2.6)	0
chr1	222988405	223179337	191	1q41	DISP1	0.337	1	198	S2(3.9)	0
chr1	42929000	43120335	191	1p34.2	CCDC30	0.018	0.4	55	S2(4)	0
chr8	143293440	143484601	191	8q24.3	TSNARE1	0.141	0.848	163	S3(2.9)	0
chr11	86142631	86333909	191	11q14.2	RP11-317J19.1	0.014	0.24	103	G1(5.5)	0
chrX	154064062	154255215	191	Xq28	F8	0.005	0	0	S2(3.7)	0
chr7	84624868	84816171	191	7q21.11	SEMA3D	1.485	1	200	S3(3.4)	0
chr11	27528384	27719721	191	11p14.1	BDNF-AS	0.113	1	246	S1(4.9)	0
chr11	113930314	114121398	191	11q23.2	ZBTB16	0.001	0	0	S2(4)	0
chr14	76776956	76968178	191	14q24.3	ESRRB	0.008	0.097	178	S3(3.2)	0
chr9	123151146	123342448	191	9q33.2	CDK5RAP2	0.827	1	239	S2(4.4)	0
chr10	86088341	86278273	190	10q23.1	CCSER2	1.697	1	220	S3(3.2)	0
chr1	102665294	102855186	190	1p21.1	RP11-202K23.1	0.001	0	0	S4(1.7)	0
chr14	91336798	91526980	190	14q32.11	RPS6KA5	0.22	1	219	S2(3.6)	0
chr8	74600925	74791089	190	8q21.11	RP11-463D19.2	0.745	0.863	331	S2(4.2)	0
chr5	36876860	37066515	190	5p13.2	NIPBL	1.707	1	202	S2(3.8)	0
chrX	117629860	117820126	190	Xq24	DOCK11	0.442	1	214	S1(5.1)	0
chr8	87566204	87755903	190	8q21.3	CNGB3	0.001	0.032	6	S4(2.1)	0
chr14	80663872	80854100	190	14q31.1	DIO2	0.127	1	192	S2(4.1)	0
chr6	119280927	119470552	190	6q22.31	FAM184A	0.001	0	0	S3(3.1)	0
chr2	53897429	54087297	190	2p16.2	ASB3	0.537	1	221	S2(4)	0
chr2	165510133	165700189	190	2q24.3	COBLL1	2.878	0.996	221	S1(4.7)	0
chr13	24982294	25171814	190	13q12.12	TPTE2P6	0.002	0	0	S2(3.6)	0
chr14	59294951	59484046	189	14q23.1	RP11-112J1.2	0.001	0	0	S2(3.9)	0
chr3	28390636	28579613	189	3p24.1	ZCWPW2	0.112	1	218	S4(2.2)	0
chr14	73741814	73930348	189	14q24.2-3	NUMB	1.173	1	190	S1(5.3)	0
chr4	74979890	75168816	189	4q13.3	MTHFD2L	0.18	1	195	S1(4.8)	0
chr2	199747296	199936514	189	2q33.1	AC018717.1	0.002	0	0	S3(2.5)	0
chr2	3192695	3381653	189	2p25.3	TSSC1	0.712	1	232	S2(3.8)	0
chr8	72315674	72504260	189	8q13.3	RP11-1102P16.1	0	0	0	S4(2)	0
chr8	92221721	92410378	189	8q21.3	SLC26A7	0.001	0	0	S3(3.2)	0
chr3	101043048	101232085	189	3q12.3	SENP7	0.703	1	194	S2(4.1)	0
chr17	15932470	16121499	189	17p11-12	NCOR1	1.281	0.989	216	S1(4.6)	0
chr1	179334854	179523870	189	1q25.2	AXDND1	0.01	0.035	73	S2(4)	0
chr7	91321322	91510034	189	7q21.2	MTERF	0.256	1	239	S2(3.7)	0
chr7	121513142	121702090	189	7q31.32	PTPRZ1	0	0	0	S4(2.3)	0
chr3	8817087	9005457	188	3p25.3	RAD18	1.074	1	195	S1(5.1)	0
chr4	11627337	11815582	188	4p15.33	RP11-281P23.2	0	0	0	S4(1.5)	0
chr8	30241943	30429778	188	8p12	RBPMS	3.177	1	200	S1(5)	0
chr15	25922419	26110317	188	15q12	ATP10A	2.001	0.996	195	S2(3.5)	0
chr10	123499938	123688316	188	10q26.13	ATE1	0.52	1	194	S2(4.2)	0
chr8	61591336	61779465	188	8q12.1-2	CHD7	0.009	0	0	S4(2.4)	0
chr11	48002112	48189670	188	11p11.2	PTPRJ	1.224	0.998	199	S1(5.2)	0
chr4	99391517	99579780	188	4q23	TSPAN5	4.149	1	214	S1(4.9)	0
chr7	20875049	21062767	188	7p15-21	AC006481.1	0	0	0	S4(1.6)	0
chr1	54691104	54879152	188	1p32.3	SSBP3	0.804	1	197	S1(4.7)	0
chr6	3269195	3457256	188	6p25.2	SLC22A23	0.002	0	0	S1(4.8)	0
chr18	53670843	53858493	188	18q21.2-31	CTD-2008L17.2	0.04	0.35	74	S2(4)	0
chr10	98757794	98945677	188	10q24.1	SLIT1	0.005	0	0	S2(4.4)	0
chr12	131438451	131626014	188	12q24.33	GPR133	0	0	0	S3(3)	0
chr2	39476406	39664453	188	2p22.1	MAP4K3	2.515	1	213	S1(5)	0
chr1	244617678	244804479	187	1q44	C1orf101	0.101	1	203	S2(4.1)	0
chr12	59989847	60176395	187	12q14.1	SLC16A7	1.359	1	223	S3(3.3)	0
chr4	89442198	89629693	187	4q22.1	HERC3	0.447	0.705	118	S1(4.9)	0
chr4	154073493	154260472	187	4q31.3	TRIM2	0.5	1	193	S1(5)	0
chr2	28680011	28866654	187	2p23.2	PLB1	0.008	0.182	34	S1(5.2)	0
chr3	12045875	12232900	187	3p25.2	SYN2	0.001	0.016	3	S2(4.1)	0
chr8	48685668	48872743	187	8q11.21	PRKDC	1.325	1	207	S1(4.7)	0
chr16	77281709	77469011	187	16q23.1	ADAMTS18	0	0	0	S4(2.4)	0
chr2	52949814	53137158	187	2p16.2	AC010967.2	0	0	0	G2(1.4)	0
chr11	22647187	22834601	187	11p14.3	GAS2	0.006	0.183	36	G2(1.4)	0
chr16	20621564	20808903	187	16p12.3	ACSM3	0.001	0	0	S2(3.5)	0
chr6	116575335	116762424	187	6q22.1	DSE	0.631	1	190	S1(4.9)	0
chrX	66764464	66950461	186	Xq12	AR	0.202	1	192	S3(2.9)	0
chr5	122179133	122365049	186	5q23.2	SNX24	0.819	1	193	S3(3.1)	0
chr3	133784146	133969689	186	3q22.2	RYK	1.033	0.815	152	S1(5.3)	0
chr2	238536218	238722325	186	2q37.3	LRRFIP1	2.124	1	232	S1(5.3)	0
chrX	106057100	106243474	186	Xq22.3	MORC4	0.186	0.461	86	S2(4.2)	0
chr18	6729716	6915715	186	18p11.31	ARHGAP28	0	0	0	S3(3)	0
chrX	85116184	85302566	186	Xq21.2	CHM	0.646	1	198	S4(1.9)	0
chr5	88013974	88199922	186	5q14.3	MEF2C	0.266	0.896	173	S3(3)	0
chr6	24171983	24358280	186	6p22.3	DCDC2	0	0	0	S4(2.1)	0
chr8	77593453	77779521	186	8q21.11	ZFHX4	0.174	1	216	S3(3.2)	0
chr13	99853027	100038688	186	13q32.3	UBAC2	0.935	1	193	S1(4.5)	0
chr6	111620233	111804918	185	6q21	REV3L	2.796	1	194	S1(4.8)	0
chr9	105902804	106087316	185	9q31.1	RP11-341A22.2	0.001	0.016	3	G2(1.4)	0
chr5	118788137	118972894	185	5q23.1	HSD17B4	0.204	0.608	114	S3(3.2)	0
chr1	182098444	182283196	185	1q25.3	GS1-122H1.2	0.001	0	0	S3(3.1)	0
chr7	24836157	25021253	185	7p15.3	OSBPL3	3.029	1	212	S1(5.1)	0
chr4	73939092	74124515	185	4q13.3	ANKRD17	2.507	1	190	S3(3.2)	0
chr2	144052989	144238358	185	2q22.2-3	AC096558.1	0	0	0	S3(3.1)	0
chrX	83572881	83757487	185	Xq21.1	HDX	0.154	1	221	S4(2.2)	0
chr18	20303453	20487684	184	18q11.2	RP11-370A5.1	0.012	0.164	57	S1(4.5)	0
chr19	4969124	5153606	184	19p13.3	KDM4B	0.854	1	253	S1(5.4)	0
chr5	140207562	140391929	184	5q31.3	PCDHA6	0	0	0	S3(2.9)	0
chr22	42556018	42739622	184	22q13.2	TCF20	0.587	0.999	188	S1(4.6)	0
chr8	108911543	109095913	184	8q23.1	RSPO2	0	0	0	S3(2.5)	0
chr14	56584531	56768244	184	14q22.3	PELI2	0.265	1	193	S3(2.9)	0
chr3	28616281	28799831	184	3p24.1	LINC00693	0.011	0	0	S4(2.4)	0
chr4	130692813	130876523	184	4q28.2	RP11-422J15.1	0	0	0	G2(1.4)	0
chr16	47758478	47942342	184	16q12.1	RP11-523L20.2	0.012	0.19	299	S3(3.3)	0
chr1	184759857	184943682	184	1q25.3	FAM129A	2.074	1	224	S1(4.7)	0
chr5	87803362	87986858	183	5q14.3	LINC00461	0	0	0	S4(2.3)	0
chr7	86506221	86689015	183	7q21.12	KIAA1324L	0.001	0	0	S4(2.2)	0
chr2	237232793	237416185	183	2q37.2-3	IQCA1	0	0	0	S3(3)	0
chr1	112719855	112903150	183	1p13.2	RP5-965F6.2	0.004	0	0	S2(4.4)	0
[truncated: 30,884 more rows]

## Sheet: mES
											number_of_CNVs
chrom	start	end	size(Kb)	band	name	RPKM	txn_coverage	longest_txn_unit(Kb)	rep_timing_ratio	CNV_coverage	APH+	APH-	NT+	NT-	all
chr8	122434740	126869622	4435	8qE1-E2	AC114005.5	0.373	0.472	459	1.5	0.006	1				1
chr7	137305964	140315033	3009	7qF3	Fgfr2	0.626	0.344	176	0.7	0
chr4	75587141	77857865	2271	4qC3	Ptprd	0.003	0.062	141	-1	0.053	1	3			4
chrX	80194208	82451480	2257	XqB-C1	Dmd	0.077	0.096	187	-0.5	0.054	1				1
chr6	45010059	47251368	2241	6qB2.2-3	Cntnap2	0.005	0.074	66	-0.7	0
chr2	40450767	42509118	2058	2qB	Lrp1b	0.004	0.086	148	-0.8	0.039	1				1
chr2	140221044	142218702	1998	2qF3-G1	Macrod2	0.017	0.244	370	-1	0.499	2	7			9
chr7	97650472	99595513	1945	7qE1	Dlg2	0.004	0.105	250	-0.8	0
chr8	15892536	17535586	1643	8qA1.1-3	Csmd1	0.002	0.046	47	-1.4	0
chr14	10382605	11994549	1612	14qA1	Fhit	0.032	0.619	802	-1.1	0.126	3	2			5
chr12	89961319	91573375	1612	12qD3	Nrxn3	0.001	0.008	13	-1.1	0
chr10	62892845	64466415	1574	10qB4-B5	Ctnna3	0.002	0.032	23	-0.8	0
chr10	72562089	74112482	1550	10qB5.3	Pcdh15	0.001	0.03	33	-1	0
chr13	109240141	110743669	1504	13qD2.1-2	Pde4d:1	0.287	0.464	708	0.1	0
chr5	18732863	20211867	1479	5qA3	Magi2	0.042	0.596	802	-1	0
chr14	115491436	116923659	1432	14qE4	Gpc5	0.005	0.115	165	-1	0.061	1				1
chr6	63205869	64618276	1412	6qC1	Grid2	0.002	0.014	21	-0.9	0.083	1	1			2
chr3	84300014	85691438	1391	3qF1	Arfip1	0.066	0.332	239	0.1	0
chrX	83986208	85360984	1375	XqC1	Il1rapl1	0.003	0.037	40	-0.5	0.049		1			1
chr2	96158325	97471823	1313	2qE1	Lrrc4c	0.001	0.024	31	-0.8	0
chr12	41750676	43056575	1306	12qB1	Immp2l	0.105	0.995	1076	0.6	0.201	3				3
chrX	134105146	135381485	1276	XqF1	Il1rapl2	0.002	0.056	48	-0.7	0
chr4	110070265	111336929	1267	4qC7-D1	Agbl4	0.013	0.049	52	-1	0.087	1				1
chr4	35653895	36898780	1245	4qA5	Lingo2	0.002	0.043	54	-1	0
chr9	9660890	10904775	1244	9qA1	Cntn5	0.001	0.006	7	-0.9	0
chr11	35820157	37049466	1229	11qA4-A5	Odz2	0.002	0.015	13	-0.9	0
chr15	47412182	48623609	1211	15qB3.3	Csmd3	0.001	0	0	-0.9	0
chr6	61130317	62332859	1203	6qB3	Fam190a	0.014	0.132	55	-1	0.07		1			1
chr19	30643727	31839312	1196	19qC1	Prkg1	0.008	0.089	55	-0.7	0.296	1				1
chr8	38585351	39724562	1139	8qA4	Sgcz	0.034	0.417	536	-1	0
chr2	161347725	162486883	1139	2qH2	Ptprt	0.061	0.746	832	-1.1	0.397	4	4			8
chr5	48780742	49915940	1135	5qB3	Kcnip4	0.001	0.003	3	-1	0
chr9	27598359	28732995	1135	9qA4	Opcml	0.001	0	0	-1	0
chr8	60255978	61390424	1134	8qB2-B3	Galntl6	0.002	0.065	53	-1	0
chr4	103291963	104417449	1125	4qC6	Dab1	0.179	0.362	395	-1	0
chr5	131913204	133019214	1106	5qG2	Auts2	0.221	1	1109	-0.5	0.668	11	21			32
chrX	163909240	165015163	1106	XqF5	Frmpd4	0.002	0.005	6	-0.7	0
chr14	39182137	40286376	1104	14qB	Nrg3	0.001	0.026	22	-1	0
chr10	89336416	90435730	1099	10qC2	Anks1b	0.116	0.962	793	-0.7	0.162		2			2
chr6	76831630	77929693	1098	6qC3	Ctnna2	0.007	0.094	104	-0.9	0.129	1	1			2
chr11	46709754	47802471	1093	11qB1.1	Sgcd	0.01	0.245	144	-1.1	0.229		3			3
chr18	71418391	72510723	1092	18qE2	Dcc	0.001	0.006	7	-1	0.125		3			3
chr11	80693670	81781959	1088	11qB5	Accn1	0.005	0.101	110	-0.4	0
chr1	68078759	69154633	1076	1qC3	Erbb4	0.002	0	0	-1.2	0.475	1	1			2
chr9	116481863	117539031	1057	9qF3	Rbms3	0.003	0.029	31	-1	0
chr17	90435913	91492337	1056	17qE5	Nrxn1	0.04	0.659	411	-1.1	0.443	1	6			7
chr14	117324518	118378751	1054	14qE4	Gpc6	0.044	0.973	1013	-1	0.37	5	5			10
chr8	120807632	121848821	1041	8qE1	Cdh13	0.049	0.702	541	-0.5	0.089		1			1
chr14	22838933	23875307	1036	14qA3	1700112E06Rik	0.01	0.285	245	-1.2	0.109	1	1			2
chr4	65041836	66065645	1024	4qC1	Astn2	0.01	0.163	117	-1.2	0
chr6	105627653	106649304	1022	6qE1	Cntn4	0.002	0.046	42	-1	0
chr1	61685397	62688858	1003	1qC2	Pard3b	0.018	0.404	405	-0.6	0.05	1	1			2
chr17	11259990	12254519	995	17qA1	Park2:2	0.009	0.017	20	-0.3	0
chr5	141717443	142691540	974	5qG2	Sdk1	0.015	0.307	299	-0.6	0.122	1				1
chr9	28802334	29770726	968	9qA4	Ntm	0.02	0.335	324	-1.3	0.034	2				2
chr16	66655665	67621153	965	16qC1-C2	Cadm2	0.007	0.128	112	-0.8	0.334	1	1			2
chr6	143776944	144730497	954	6qG3	Sox5	0.017	0.492	369	-0.6	0
chr16	59653308	60605357	952	16qC1.3	Epha6	0.002	0.026	25	-0.8	0
chr1	131169878	132115855	946	1qE4	Thsd7b	0.001	0	0	-1.3	0
chr1	8351555	9289959	938	1qA1-A2	Sntg1	0.003	0.029	27	-0.3	0
chr15	22478776	23404173	925	15qA2	Cdh18	0.009	0.147	79	-0.9	0.059	1				1
chr6	110595574	111517224	922	6qE3	Grm7	0.003	0.092	89	-0.9	0
chr1	127810196	128727376	917	1qE3	Nckap5	0.016	0.416	411	-1.4	0.084	1				1
chr8	116963554	117876608	913	8qE1	Wwox	0.329	1	925	-0.8	0.491	7	7			14
chr5	27143742	28054045	910	5qB1	Dpp6	0.089	1	928	0	0
chrX	39881042	40782303	901	XqA4	Odz1	0.019	0.326	333	-0.5	0.056		1			1
chr2	19831406	20732340	901	2qA3	Etl4	0.994	0.389	308	0.7	0
chr1	69873561	70771706	898	1qC3	Spag16	0.008	0.115	104	-1.4	0
chr1	117581332	118478603	897	1qE2.3	Cntnap5a	0.001	0	0	-1.2	0
chr7	57230233	58120625	890	7qB5	Nell1	0.005	0	0	-0.8	0.261	2				2
chr13	92020004	92901611	882	13qC3	Rasgrf2	0.008	0	0	-0.4	0
chr14	93414730	94287951	873	14qE2.1	Pcdh9	0.001	0.051	24	-0.8	0
chr3	118265046	119135836	871	3qG1	Dpyd	0.003	0	0	-1	0.324	2	2			4
chr5	91701000	92569955	869	5qE1-E2	Gm15710	0.536	0.33	230	0.1	0
chr6	27225120	28085178	860	6qA3.1-2	Grm8	0.01	0.069	56	-1.1	0
chr15	30102347	30959066	857	15qB2	Ctnnd2	0.062	0.97	821	-1	0.268	1	3			4
chr14	28435613	29291721	856	14qA3	Erc2	0.135	1	882	-0.5	0.038		2			2
chr8	68141798	68995536	854	8qB3.1-2	2014-03-01	0.006	0.146	112	-1.3	0
chr17	70318412	71170753	852	17qE1.3	Dlgap1	0.014	0.206	99	0.1	0
chr19	22213608	23064374	851	19qB	Trpm3	0.01	0.243	207	0	0
chr13	16949688	17786566	837	13qA2	5033411D12Rik	0.009	0.114	95	-0.9	0
chr12	54349663	55173162	823	12qC1	Npas3	0.009	0.101	83	-0.5	0
chr14	29718132	30535050	817	14qA3-B	Cacna2d3	0.011	0.433	374	-1.2	0.421	2	1			3
chr5	81449162	82254158	805	5qD-E1	Lphn3	0.023	0.841	662	-1	0.415	3	1			4
chr4	150433632	151235985	802	4qE2	Camta1	0.151	0.66	333	0.7	0
chr12	117724192	118516640	792	12qF2	Ptprn2	0.02	0.767	311	-0.5	0.061		1			1
chr6	79968870	80760137	791	6qC3	Lrrtm4	0.001	0	0	-1	0.191		1			1
chr8	83866454	84648935	782	8qC2	Inpp4b	0.006	0.111	81	-1.4	0
chr18	38761187	39535938	775	18qB3	Arhgap26	0.101	1	837	0.9	0
chr16	42875993	43642715	767	16qB4	Zbtb20	0.189	1	791	-0.6	0
chr14	35633010	36396565	764	14qB	Grid1	0.015	0.489	373	-0.5	0
chr1	25124320	25886552	762	1qA5	Bai3	0.01	0.164	63	-1.3	0.26	2				2
chr3	156224757	156979409	755	3qH4	Negr1	0.002	0	0	-1.1	0.043		1			1
chr12	38606760	39359997	753	12qA3	Dgkb	0.06	0.346	261	-0.9	0.625	4	1			5
chr8	14095864	14847684	752	8qA1.1	Dlgap2	0.018	0.476	317	0	0
chr12	67572501	68323529	751	12qC2	Mdga2:2	0.003	0.121	79	-0.9	0.086		1			1
chr7	103319753	104059603	740	7qE1	Odz4	0.588	0.948	702	0.7	0
chr17	72218781	72953049	734	17qE1.3	Alk	0.018	0.457	333	-0.9	0
chr9	68501592	69236053	734	9qC	Rora	0.064	0.835	517	-0.4	0.325		1			1
chr14	119537636	120268816	731	14qE4	Hs6st3	0.044	0.838	615	-0.6	0.145		1			1
chr6	33199084	33923979	725	6qA3.3	Exoc4	2.333	0.996	621	-0.1	0
chrX	152059283	152780430	721	XqF3-F4	Gm15155	0.001	0	0	-0.6	0
chrX	126284277	127000370	716	XqE3	Diap2	0.604	1	762	-0.2	0.109		1			1
chr1	125228715	125942136	713	1qE2.3	Dpp10	0.001	0.008	3	-1.1	0
chr1	101669341	102382519	713	1qE1.1	Cntnap5b	0	0	0	-1.4	0
chr10	101144120	101854103	710	10qD1	Mgat4c	0.01	0.035	28	-0.8	0
chr1	190085901	190788920	703	1qH6	Ush2a	0.002	0.011	8	-1	0
chr3	25330732	26032656	702	3qA3	Nlgn1	0.001	0	0	-1.1	0.303		3			3
chr14	124377128	125076349	699	14qE5	Fgf14	0.006	0.318	215	-0.6	0
chr10	48819265	49508572	689	10qB3	Grik2	0.007	0.191	118	-0.9	0
chr2	134611894	135300994	689	2qF3	Plcb1	0.035	1	693	-0.6	0
chr14	12386045	13074555	689	14qA1	Ptprg	1.203	1	692	1.2	0.082		2			2
chr17	67016187	67703799	688	17qE1.1	Ptprm	0.019	0.694	477	-0.8	0
chr2	54288727	54970720	682	2qC1.1	Galnt13	0.028	0.381	218	-0.9	0
chr5	128263860	128938937	675	5qG1.2-3	Tmem132d	0.067	0.996	679	-0.1	0
chr7	63971834	64642558	671	7qC	Gabrg3	0.012	0.46	294	-1.2	0
chr13	29283614	29947543	664	13qA3.1-2	Cdkal1	0.84	0.833	554	-0.1	0
chr4	20046020	20706013	660	4qA3	Nkain3	0.029	0.709	468	-1	0.033	1				1
chr16	41532970	42181792	649	16qB4	Lsamp	0.003	0	0	-1.1	0
chr13	76521982	77171071	649	13qC1	Mctp1	0.008	0.094	61	-0.9	0.056		1			1
chr2	43604343	44251473	647	2qB	Arhgap15	0	0	0	-1.1	0
chr17	57908992	58549765	641	17qD	Cntnap5c	0.001	0	0	-1.1	0
chr3	75878191	76513941	636	3qE3	Fstl5	0.003	0.085	54	-1	0.187	1	1			2
chr10	26701093	27336748	636	10qA4	Lama2	0.006	0.062	249	-1	0
chr1	22276331	22911673	635	1qA4-A5	Rims1	0.093	0.485	279	-0.9	0
chr10	118891089	119524317	633	10qD2	Grip1	0.242	0.991	628	-0.3	0
chrX	117403867	118024228	620	XqE2	Pcdh11x	0.002	0	0	-0.4	0
chr5	4803390	5420312	617	5qA1	Cdk14	0.081	0.935	588	-1.1	0.334	1	4			5
chr3	28980944	29590126	609	3qA3	Egfem1	0	0	0	-1.3	0
chr11	25502762	26110763	608	11qA3.2-3	5730522E02Rik	0.065	0.87	530	-0.2	0.03	1				1
chr6	93625448	94233316	608	6qD1	Magi1	0.661	1	652	0.9	0
chr1	189432669	190038764	606	1qH5-H6	Esrrg	0.002	0	0	-1.4	0
chrX	37223676	37828738	605	XqA3.3	Gm14643	0	0.005	3	-0.6	0
chr6	118542313	119146249	604	6qF1	Cacna1c	0.008	0.056	34	-0.3	0
chr16	6809314	7412572	603	16qA1	Rbfox1	0.011	0.174	105	-0.8	0
chr13	103522565	104124577	602	13qD1	Mast4	0.354	1	613	-0.3	0
chr19	42863436	43462801	599	19qC3	Hpse2	0.032	0.828	533	-0.2	0
chr16	33974343	34573618	599	16qB3	Kalrn	0.053	0.965	438	0.1	0
chr16	24393435	24992662	599	16qB1	Lpp	1.01	1	666	0.4	0
chr19	48280514	48879995	599	19qD1	Sorcs3	0.001	0.005	3	-1.3	0
chr3	29850220	30446930	597	3qA3	Mecom	0.017	0.496	266	-0.6	0
chr2	3938762	4535083	596	2qA1	Frmd4a	0.061	0.356	214	0	0
chr9	97344813	97933600	589	9qE3.3	Clstn2	0.015	0.557	328	-1.1	0.07		1			1
chr11	34934725	35522009	587	11qA4	Slit3	0.126	1	595	-0.4	0
chr2	112471511	113057253	586	2qE3-E4	Ryr3	0.008	0.08	50	-0.5	0
chr4	127665100	128244903	580	4qD2.2	Csmd2	0.032	0.61	354	-0.6	0
chr16	96813685	97392359	579	16qC4	Dscam	0.018	0.738	431	-1.2	0.145	2				2
chr2	123915704	124493506	578	2qF1	Sema6d	0.004	0.047	27	-1.3	0
chr3	34003359	34581541	578	3qA3	Sox2ot	0.345	0.095	158	1	0
chr6	23212772	23789421	577	6qA3.1	Cadps2	0.032	0.813	239	-1	0
chr1	162149304	162723069	574	1qH2.1	Rabgap1l	0.247	1	602	0	0
chr8	29757188	30329810	573	8qA2-A3	Unc5d	0.012	0.217	169	-1.2	0.067		1			1
chr7	122614857	123182258	567	7qF1	Sox6	0.033	0.997	566	-0.5	0
chr1	180882090	181448172	566	1qH4	Smyd3	0.666	1	591	1	0
chr13	8202111	8767993	566	13qA1	Adarb2	0.002	0.107	61	-0.3	0
chr14	77556622	78121214	565	14qD3	Enox1	1.384	1	620	1.1	0
chr8	9207237	9771018	564	8qA1.1	Fam155a	0.007	0.106	60	-1.4	0
chr1	21388483	21952023	564	1qA4	Kcnq5	0.049	0.888	501	-0.9	0.258	2				2
chr1	11404185	11965982	562	1qA2	A830018L16Rik	0.075	0.644	362	-0.4	0
chr3	67868863	68430404	562	3qE1	Schip1	0.401	0.326	176	0.2	0
chr9	94570327	95130864	561	9qE3.3	Slc9a9	0.008	0.198	68	-1.1	0
chr1	20047859	20608145	560	1qA3-A4	Pkhd1	0.062	0.781	443	-1.3	0
chr15	35301300	35860983	560	15qB3.1	Vps13b	0.886	0.977	317	0.4	0
chr3	86028601	86586615	558	3qF1	Lrba	0.361	1	564	0.1	0.189		1			1
chr3	55429126	55987623	558	3qC	Nbea	0.271	1	561	-0.9	0.083		1			1
chr9	59814737	60369853	555	9qB	Thsd4	0.021	0.651	253	-0.3	0
chr13	11645369	12199212	554	13qA1	Ryr2	0.223	1	555	0.4	0
chr9	34293710	34844301	551	9qA4	Kirrel3	0.004	0.051	28	-0.5	0
chr14	60266367	60816016	550	14qD1	Atp8a2	0.021	0.894	457	-0.3	0
chr8	129587792	130136186	548	8qE2	Pard3	1.248	1	575	0.3	0
chr6	96063147	96607192	544	6qD3	Fam19a1	0.003	0.128	74	-1.2	0
chr2	6460750	7002348	542	2qA1	Celf2	0.087	0.622	336	-1.1	0
chr12	83717911	84259755	542	12qD1	Rgs6	0.015	0.444	242	-0.8	0
chr6	14851348	15391977	541	6qA1	Foxp2	0.009	0.05	28	-0.9	0
chr8	75338497	75877439	539	8qB3.3	Large	0.898	0.991	488	-0.6	0
chrX	110411118	110949995	539	XqE1	Dach2	0.018	0.418	226	-0.5	0.249	1	2			3
chr13	81234066	81772153	538	13qC3	Gpr98	0.085	0.995	536	-0.3	0
chr8	77972592	78508402	536	8qC1	1700007B14Rik	0.004	0.095	59	-1.1	0
chr19	50218429	50753102	535	19qD1	Sorcs1	0.003	0.164	95	-1.1	0
chr7	94750951	95283417	532	7qE1	Grm5	0.002	0.066	35	-1	0
chr10	4795848	5326338	530	10qA1	Syne1	0.05	1	544	-0.9	0
chr9	88494493	89023388	529	9qE3.1	Gm17683	0.008	0.087	36	0.4	0
chr10	27794625	28317203	523	10qA4	Ptprk	1.283	1	529	-0.4	0.098		1			1
chr4	113150495	113672108	522	4qD1	Skint5	0	0.013	7	-0.8	0
chr19	57685523	58207828	522	19qD2	Atrnl1	0.125	1	537	-0.3	0
chr8	24746490	25267057	521	8qA2	Zmat4	0.108	0.774	403	-0.1	0
chr4	101760147	102279864	520	4qC6	Pde4b	0.01	0.187	48	-1.2	0
chr3	152868368	153388026	520	3qH3	St6galnac3	0.217	1	562	0.1	0
chr16	73892550	74412070	520	16qC3.1	Robo2	0.003	0.015	8	-1.1	0
chr13	31911447	32430483	519	13qA3.2	Gmds	0.136	1	553	-0.7	0
chr13	20182487	20698397	516	13qA2	Elmo1	0.368	1	538	0.4	0
chr17	71227417	71742624	515	17qE1.3	Gm16724	0.054	0.559	167	1.3	0
chr6	21165502	21679805	514	6qA2-A3	Kcnd2	0.012	0.437	226	-1.2	0.223		6			6
chr10	107934705	108448038	513	10qD1	Syt1	0.014	0.46	236	-0.5	0
chr15	33012883	33524307	511	15qB3.1	Pgcp	0.024	0.16	79	-1.1	0.088	1				1
chrX	165233030	165742367	509	XqF5	Arhgap6	0.016	0.798	337	-0.9	0
chrX	66613468	67121212	508	XqA7.1	Aff2	0.005	0.061	31	-0.7	0.425	2				2
chr12	80398337	80904257	506	12qC3	Rad51l1	0.501	1	548	0.9	0.055	1				1
chrX	56315321	56821248	506	XqA6	Fgf13	0.02	0.492	177	-0.8	0
chr14	24117982	24622526	505	14qA3	Kcnma1	0.01	0.174	88	-1.2	0.031		1			1
chr3	138868657	139373263	505	3qH1	B930007M17Rik	0.005	0.13	39	-0.8	0
chr17	68623136	69127301	504	17qE1.2-3	L3mbtl4	0.001	0	0	-1.2	0.033				1	1
chr11	92959341	93463063	504	11qD	Car10	0.003	0.048	24	-0.7	0
chr7	141862369	142365322	503	7qF3	Dock1	0.869	1	569	-0.2	0.056		1			1
chr13	88961076	89462828	502	13qC3	Edil3	0.007	0.053	27	-0.9	0
chr1	163912583	164408165	496	1qH2.1	Dnm3	0.01	0.147	46	-0.4	0
chr10	68996969	69490184	493	10qB5.3	Ank3	0.058	0.588	275	0.4	0
chr11	9091944	9584262	492	11qA1	Abca13	0.004	0.032	16	-0.7	0
chr2	62531470	63022344	491	2qC1.3	Kcnh7	0.014	0.358	177	-1	0
chr17	86567124	87057259	490	17qE4	Prkce	0.091	1	492	1.2	0
chr1	38234170	38721800	488	1qB	Aff3	0.215	0.921	452	-0.6	0
chr2	37654509	38142910	488	2qB	Dennd1a	0.368	0.999	489	0.6	0
chr3	126624524	127111949	487	3qG2	Ank2	0.112	1	585	-0.1	0
chr9	104449615	104936874	487	9qF1	Cpne4	0.004	0.021	10	-1	0
chr10	12101985	12589163	487	10qA1	Utrn	2.13	1	593	0.2	0
chr14	87055173	87541031	486	14qE1	Diap3	1.058	1	508	-0.9	0
chr1	32229650	32714583	485	1qB	Khdrbs2	0.005	0.125	52	-1.2	0
chr12	57813620	58298459	485	12qC1	Slc25a21	0.007	0.221	103	-0.9	0
chr13	57524450	58008948	484	13qB1	Spock1	0.006	0	0	-0.5	0
chr15	39029877	39513486	484	15qB3.1	Rims2	0.805	0.99	432	0.8	0
chr4	18334495	18818989	484	4qA3	Gm11867	0.003	0	0	-0.7	0
chr4	112477220	112959578	482	4qD1	Skint6	0	0	0	-0.8	0
chr12	34732450	35213754	481	12qA3	Hdac9	0.015	0.426	168	-1.3	0.396	1	3			4
chrX	89364217	89844911	481	XqC2-C3	Mageb18	0	0	0	-0.6	0
chr3	157745858	158225185	479	3qH4	Lrrc7	0	0	0	-0.7	0
chr13	77274796	77752940	478	13qC1	2210408I21Rik	0.129	1	493	-1	0.094		1			1
chr15	21041206	21519288	478	15qA2	Cdh12	0.012	0.367	177	-0.8	0
chr10	122701131	123178032	477	10qD2	Fam19a2	0.002	0.015	7	-1.1	0
chr5	13125592	13602565	477	5qA1	Sema3a	0.005	0	0	-0.9	0
chr5	28784813	29260535	476	5qB1	9530036O11Rik	0.002	0.057	27	-0.4	0
chr4	146392343	146866310	474	4qE1	Gm16889	0.003	0.133	63	1.5	0
chr2	144993489	145467902	474	2qG1	Slc24a3	0.004	0	0	-1	0
chr11	85166668	85639560	473	11qC	Bcas3	0.944	1	479	0.9	0
chr5	98758372	99230929	473	5qE3	1700007G11Rik	0.008	0.104	125	-1.2	0
chr15	72420050	72891634	472	15qD3	Trappc9	0.203	1	474	0.4	0
chr11	34126814	34597394	471	11qA4	Dock2	0.027	1	472	-0.6	0
chr5	130845345	131316515	471	5qG1-G2	Caln1	0.004	0.024	125	-0.4	0
chr10	105902320	106370502	468	10qD1	Ppfia2	0.001	0.019	9	-1	0.224		1			1
chr9	15714648	16182681	468	9qA2	Fat3	0.007	0.122	58	-1.2	0
chr18	89470473	89938920	468	18qE4	Dok6	0.003	0	0	-1	0
chr15	94459615	94926528	467	15qE3	Tmem117	0.022	0.462	182	-0.7	0
chr1	3195981	3661579	466	1qA1	Xkr4	0.086	1	474	-1.4	0
chr4	5571236	6035370	464	4qA1	Fam110b	0.328	0.438	204	-0.4	0
chr2	21289168	21752174	463	2qA3	Gpr158	0.004	0	0	-1	0
chr18	84297418	84759117	462	18qE4	Zfp407	0.677	1	472	-0.4	0
chr17	8718236	9179513	461	17qA1	Pde10a	0.011	0.399	186	-0.6	0
chr5	21390271	21850523	460	5qA3	Reln	0.026	0.971	448	-0.1	0
chr6	28425138	28885162	460	6qA3.3	Snd1	2.054	0.959	441	0.6	0
chr13	77847950	78305499	458	13qC1	Fam172a	0.437	1	459	-0.6	0
chr13	42775991	43233895	458	13qA4	Phactr1	0.063	0.999	458	0.2	0
chr12	79327641	79785754	458	12qC3	Gphn	0.261	1	460	-0.6	0
chr2	179177135	179634078	457	2qH4	Cdh4	0.135	0.997	470	0.9	0
chr6	36796021	37250184	454	6qB1	Dgki	0.183	1	461	-0.8	0
chr15	94905660	95359137	453	15qE3-F1	Nell2	0.012	0.429	195	-1.2	0
chr9	73328676	73781374	453	9qD	Unc13c	0.006	0.139	63	-0.9	0
chr15	32174567	32626096	452	15qB3.1	Sema5a	0.021	0.953	335	-1.2	0.457	2	2			4
chr12	53800369	54252002	452	12qC1	Akap6	0.003	0.029	13	-0.1	0
chr14	30853134	31304342	451	14qB	Cacna1d	0.007	0	0	0.6	0
chr6	84568479	85019507	451	6qC3	Exoc6b	1.244	1	475	0.6	0
chr14	13205076	13655593	451	14qA1	Cadps	0.013	0.129	58	-0.4	0
chr7	38103692	38554771	451	7qB2	Zfp536	0.007	0.262	118	0.4	0
chr15	40486587	40936138	450	15qB3.1	Zfpm2	0.087	1	455	-0.9	0
chr7	83462957	83911494	449	7qD2	Agbl1	0.001	0	0	-1.2	0
chr8	49313035	49760044	447	8qB1.2	Odz3	0.428	1	631	-0.5	0
chr17	50872451	51318674	446	17qC	Tbc1d5	0.253	1	456	-0.9	0.339	3	4			7
chr6	32094564	32538192	444	6qA3.3	Plxna4	0.012	0.387	187	-0.9	0
chr6	135679843	136123529	444	6qG1	Grin2b	0.014	0.576	195	-0.5	0
chr10	85517869	85961641	444	10qC1	Syn3	0.045	0.661	294	0.1	0
chr17	63406800	63849366	443	17qE1.1	Fbxl17	0.406	1	480	0.1	0.104		1			1
chr15	53293175	53734092	441	15qC-D1	Samd12	0.125	1	450	-0.8	0
chr5	15440508	15880329	440	5qA2	Cacna2d1	0.329	1	449	-1	0.063	1				1
chr1	91351380	91791857	440	1qD	Agap1	0.819	1	465	1.2	0
chr2	169458670	169897316	439	2qH3	Tshz2	0.006	0.123	39	0.9	0
chr6	12261609	12699410	438	6qA1	Thsd7a	0.06	0.998	440	-1.2	0
chr5	72091170	72529628	438	5qC3.2	Gabrb1	0.001	0	0	-0.7	0
chr17	10595877	11033177	437	17qA1	Pacrg	0.013	0.381	169	0.8	0
chr5	131347951	131783948	436	5qG2	Wbscr17	0.019	0.722	315	-0.5	0
chr11	108286505	108721929	435	11qE1	Ccdc46	0.045	1	496	-1	0
chr4	84851029	85285099	434	4qC4	Sh3gl2	0.614	0.825	540	-0.3	0
chrX	141123449	141556954	434	XqF2	Zcchc16	0.001	0.007	3	-0.6	0
chr14	7568220	8002264	434	14qA1	Gm10406	0.01	0.014	3	-1.5	0
chr9	101824457	102257023	433	9qF1	Ephb1	0.01	0.28	100	-1.1	0
chr5	99726262	100158084	432	5qE3-E4	A930011G23Rik	0.003	0	0	-0.7	0
chr1	152409653	152840565	431	1qG1	Hmcn1	0.015	0.306	143	-0.9	0
chr1	176989866	177421261	431	1qH3-H4	Rgs7	0.007	0.377	164	-1.3	0
chr4	97439424	97868605	429	4qC6	Nfia	0.031	0.792	340	-1.1	0
chr7	62091328	62520736	429	7qB5	Luzp2	0.002	0	0	-1.1	0
chr11	88152883	88579827	427	11qC	Msi2	1.81	1	474	1.5	0
chr15	37295929	37722325	426	15qB3.1	Ncald	0.007	0	0	0.2	0
chr9	42326217	42752576	426	9qA5.1	Grik4	0.021	0.537	229	0.6	0
chr13	28551902	28977489	426	13qA3.1	2610307P16Rik	0.452	1	476	0	0
chrX	97170944	97596101	425	XqC3	Eda	0.066	1	427	-0.5	0.127		1			1
chr16	81200941	81624530	424	16qC3.3	Ncam2	0.004	0.038	16	-0.7	0
chr11	52578135	53002040	424	11qB1.3	Fstl4	0.006	0	0	0.4	0
chr18	24867945	25292001	424	18qA2	Fhod3	0.206	1	460	0.7	0
chr7	151187832	151610399	423	7qF5	Shank2	0.023	1	465	0.3	0
chr11	118351073	118772911	422	11qE2	Rbfox3	0.008	0.092	39	0.8	0
chr18	42797085	43219125	422	18qB3	Ppp2r2b	0.007	0.047	20	-0.8	0
chr2	5214502	5635561	421	2qA1	Camk1d	1.009	1	487	0.9	0
chr19	28333340	28754567	421	19qC1	Glis3	0.168	1	445	-0.3	0
chr2	139082611	139503450	421	2qF3	Gm14066	0.002	0	0	-1.2	0
chr10	52410338	52831428	421	10qB3	Slc35f1	0.046	1	422	-0.7	0
chr13	36209279	36629461	420	13qA3.3	Fars2	0.722	1	533	-0.5	0
chr3	129883808	130302795	419	3qG3	Col25a1	0.004	0	0	-0.9	0
chr16	9577802	9995014	417	16qA1	Grin2a	0.017	0.37	162	-0.8	0
chr18	45428658	45845678	417	18qB3-C	Kcnn2	0.067	0.434	187	-1.2	0
chr3	51491532	51908813	417	3qC	Maml3	0.023	0.868	363	-0.2	0
chr5	102910409	103326955	417	5qE5	Arhgap24	0.016	0.769	238	-1.3	0.042		1			1
chr4	81936076	82351654	416	4qC3	Nfib	0.578	0.588	268	0.8	0
chr7	131126382	131542503	416	7qF3	Hs3st4	0.117	1	416	-1	0
chr15	41279027	41692594	414	15qB3.1	Oxr1	0.3	1	441	0.1	0
chr14	96504477	96918321	414	14qE2.1	Klhl1	0	0	0	-0.7	0
chr9	22280158	22692724	413	9qA3	Bbs9	0.259	1	492	0.6	0
chr3	28162135	28574780	413	3qA3	Tnik	0.03	0.99	409	-0.8	0
chr11	107794700	108205242	411	11qE1	Prkca	0.082	0.996	410	-0.3	0
chr5	96802973	97213747	411	5qE3	Fras1	0.049	1	421	-1	0
chr5	58109259	58520590	411	5qC1	Pcdh7	0.007	0.063	17	-1	0
chr5	111308821	111718800	410	5qF	Ttc28	0.115	1	412	0.9	0
chr13	45650261	46060345	410	13qA5	Atxn1	0.104	1	472	-0.3	0
chr6	99207477	99616791	409	6qD3	Eif4e3	0.05	1	781	0.7	0
chr2	77248690	77657696	409	2qC3	Zfp385b	0.016	0.45	169	-0.3	0
chr1	148342758	148749602	407	1qF-G1	Fam5c	0.004	0.113	46	-1.1	0
chr8	65429805	65835900	406	8qB3.1	Spock3	0.004	0.159	65	-1.2	0
chr3	13776847	14182287	405	3qA1	Ralyl	0.008	0.209	153	-1.2	0
chr11	113106166	113511393	405	11qE2	Slc39a11	0.096	1	411	0.8	0
chr4	119406388	119810650	404	4qD2.1	Hivep3	0.018	0.393	159	0.1	0
chr1	180459255	180862986	404	1qH4	Kif26b	0.024	0.96	262	0.6	0
chr19	17507882	17912122	404	19qB	Pcsk5	0.008	0	0	-0.8	0
chr4	83918445	84320990	403	4qC4	Bnc2	1.169	1	471	0.9	0
chr10	113835878	114239363	403	10qD2	Trhde	0.001	0	0	-1.1	0
chr7	71900981	72301456	400	7qC	Fam189a1	0.053	1	405	0.4	0
chr12	41172639	41573073	400	12qB1	Dock4	0.262	1	413	0.3	0
chr1	33965124	34365495	400	1qB	Dst	2.051	1	406	1.2	0
chr2	16277930	16677466	400	2qA2-A3	Plxdc2	0.777	1	486	-0.8	0.039	1				1
chr1	15302532	15701710	399	1qA3	Kcnb2:1	0.002	0	0	-0.2	0
chr10	10405856	10802154	396	10qA1	Grm1	0.003	0	0	-0.7	0
chr14	21871854	22267769	396	14qA3	Adk	1.956	1	447	1.1	0
chr1	10314800	10710026	395	1qA2	Cpa6	0.002	0	0	-0.8	0
chr2	47918067	48312765	395	2qB-C1	Gm13481	0.003	0.035	14	-1.1	0
chr12	30213248	30608074	395	12qA2	Myt1l	0.003	0	0	-1.1	0
chr16	87896440	88289947	394	16qC3.3	Grik1	0.001	0	0	-1.3	0
chr10	5340926	5734948	394	10qA1	Esr1	0.001	0.063	25	-0.3	0.03				1	1
chr6	146056820	146450745	394	6qG3	Itpr2	0.009	0	0	-0.3	0
chr10	59765495	60159238	394	10qB4	Cdh23	0.007	0	0	1	0
chr10	32803288	33196515	393	10qA4	Trdn	0.002	0.01	4	-0.7	0
chr13	9275773	9668174	392	13qA1	Dip2c	0.432	1	416	0	0
chr8	101548370	101940371	392	8qD1	Cdh8	0.012	0.209	83	-1.1	0
chr11	44430818	44821593	391	11qB1.1	Ebf1	0.136	1	396	-0.5	0
chr2	69877182	70267255	390	2qC2	Myo3b	0.013	0.435	215	0.5	0
chr8	63992042	64381487	389	8qB3.1	Palld	0.182	0.936	368	-0.6	0
chr2	113167892	113556924	389	2qE4	Fmn1	0.059	0.711	309	-1.2	0
chr14	17263355	17651381	388	14qA2	Rarb	0.005	0.101	39	-0.8	0.069				1	1
chr2	17265535	17653091	388	2qA3	Nebl	0.024	1	423	-0.5	0
chr1	53863725	54252012	388	1qC1.1	Hecw2	0.083	0.999	389	0.2	0
chr17	75404907	75791852	387	17qE2	Ltbp1	0.111	0.998	387	-0.4	0
chr10	104624718	105011507	387	10qD1	Tmtc2	0.047	1	405	-1.2	0.366	1	2			3
chr5	32000056	32387335	387	5qB1	Bre	0.704	1	501	0.9	0
chr18	44584714	44971836	387	18qB3	Mcc	0.351	1	416	1	0
chr12	92236931	92622849	386	12qD3	4930534B04Rik	0.38	1	457	-0.6	0.083		1			1
chr7	85337247	85723294	386	7qD3	Ntrk3	0.012	0.616	162	-1.2	0
chr8	37630804	38015490	385	8qA4	Dlc1	0.444	0.397	104	1	0
chr2	14525932	14909535	384	2qA2	Cacnb2	0.051	0.999	384	-1	0.174	1	1			2
chr16	72663393	73046340	383	16qC3.1	Robo1	0.589	1	385	-0.7	0.047	1				1
chr14	98186065	98568984	383	14qE2.1	Dach1	0.011	0.281	108	-1	0
chr15	12286808	12669679	383	15qA1	Pdzd2	0.338	1	385	0.8	0
chr5	36359828	36740788	381	5qB3	Sorcs2	0.021	0.994	411	0.7	0
chr13	68758919	69138419	380	13qB3	Adcy2	0.042	1	389	-1.3	0
chr5	150921241	151300327	379	5qG3	Fry	0.125	1	381	0.7	0
chr9	4417898	4796234	378	9qA1	Gria4	0.074	0.996	377	-1	0
chr8	70880679	71259045	378	8qB3.3	Csgalnact1	0.009	0.045	17	-0.8	0
chr14	18493473	18870602	377	14qA2	Thrb	0.005	0	0	-0.8	0
chr3	66785311	67162318	377	3qE1	Rsrc1	0.594	0.992	390	-0.6	0
chr18	63169866	63546837	377	18qE1	Fam38b	0.064	0.999	388	-0.9	0.038		1			1
chr15	92227345	92602250	375	15qE3	Pdzrn4	0.014	0.224	137	-1.1	0
chr13	118391286	118765609	374	13qD2.3	Hcn1	0.007	0.051	23	-0.9	0
chr4	85699818	86074289	374	4qC4	Adamtsl1	0.051	1	377	0.6	0.182	1				1
chr1	6477311	6851021	374	1qA1	St18	0.016	0.878	149	-0.9	0
chr2	48805029	49177804	373	2qC1.1	Mbd5	0.484	1	378	-0.3	0.108		1			1
chr8	70212980	70586185	373	8qB3.3	Psd3	0.097	1	380	-1.3	0
chr6	104442783	104813400	371	6qE1	Cntn6	0	0	0	-0.9	0
chr9	55397689	55767412	370	9qB	Scaper	0.29	1	406	0.1	0
chrX	57476466	57845873	369	XqA6	Atp11c	0.263	0.525	188	0.3	0
chr4	95224197	95593630	369	4qC5	Fggy	0.194	1	375	-0.9	0
chr3	141128527	141497888	369	3qH1	Unc5c	0.009	0.162	41	-1	0
chr17	85489945	85857479	368	17qE4	1700106N22Rik	0.222	1	375	0.9	0.109		1			1
chr5	22252010	22618785	367	5qA3	Lhfpl3	0.002	0	0	-0.7	0
chr1	142142792	142508640	366	1qF	Kcnt2	0.145	1	388	-0.1	0
chr9	3532353	3897342	365	9qA1	Gucy1a2	0.246	1	407	-0.3	0
chr7	56501558	56865457	364	7qB4-B5	Nav2	0.865	1	365	1.3	0
chr11	33529338	33893152	364	11qA4	Kcnip1	0.003	0.03	8	0.6	0
chr13	114584712	114947669	363	13qD2.2	Arl15	1.516	1	425	0.9	0
chr2	44419931	44783177	363	2qB	Gtdc1	0.441	1	376	-0.8	0
chr8	10272571	10634741	362	8qA1.1	Myo16	0.007	0	0	-1.4	0
chr13	63066252	63427404	361	13qB3	2010111I01Rik	0.577	1	366	1.2	0
chr9	100498216	100858964	361	9qE4	Stag1	2.654	0.999	371	1.1	0
chr17	30352468	30713394	361	17qA3.3	Btbd9	0.718	0.992	303	1.1	0
chr7	8639867	9001004	361	7qA1	Gm3607	0	0	0	NULL	0
chr18	21969397	22329897	361	18qA2	4921528I01Rik	0.001	0.019	7	-1	0
chr5	84486815	84846407	360	5qE1	Epha5	0.002	0	0	-0.9	0
chr5	148768895	149127641	359	5qG3	Mtus2	0.013	0.141	135	0.9	0
chr18	78947118	79306130	359	18qE3	Setbp1	0.249	0.999	360	-1.1	0
chr14	122933545	123290322	357	14qE5	Pcca	0.198	1	380	0.7	0
chr16	89787355	90144014	357	16qC3.3	Tiam1	0.584	1	385	1	0
chr2	135484746	135840329	356	2qF3	Plcb4	0.644	1	369	0.2	0
chr8	93837430	94192338	355	8qC5	Fto	1.133	1	390	-0.1	0
chr3	109582957	109938426	355	3qF3	Ntng1:1	0.003	0	0	-1.1	0
chr17	46608449	46962170	354	17qC	Gm16736	0.152	0.457	110	1.3	0
chr5	89315842	89668678	353	5qE1	Slc4a4	0.039	1	362	-0.4	0
chr14	79248984	79602117	353	14qD3	1300010F03Rik	0.477	0.989	318	0.9	0
chr17	4994331	5347656	353	17qA1	Arid1b	0.576	1	354	0.2	0
chr15	26472838	26825273	352	15qB1	Fbxl7	0.071	1	357	-1.3	0
chrX	156065203	156416001	351	XqF4	Sh3kbp1	0.103	0.996	351	0.5	0
chr14	123675862	124026366	351	14qE5	Nalcn	0.045	0.627	220	-1.1	0
chr2	75827197	76176831	350	2qC3	Pde11a	0.011	0.082	71	0.5	0
chr6	125640436	125990144	350	6qF3	Ano2	0.003	0.006	146	0.3	0
chr16	11405740	11755565	350	16qA1	Snx29	0.205	1	355	0.3	0
chr5	14514917	14863457	349	5qA1	Pclo	0.02	0.822	329	-1	0
chr4	99768395	100117370	349	4qC6	Ror1	0.123	1	365	-1	0
chr7	141074881	141423829	349	7qF3	Adam12	0.007	0.129	45	-0.2	0
chr5	117864008	118213336	349	5qF	Ksr2	0.121	1	364	1.1	0
chr18	22851655	23200154	348	18qA2	Nol4	0.012	0.435	152	-0.9	0
chr4	32325778	32673083	347	4qA5	Bach2	0.123	0.998	351	0.9	0
chr1	88600378	88946672	346	1qD	Dis3l2	0.428	1	361	1.1	0
chr7	129432264	129777916	346	7qF3	Prkcb	0.056	0.994	345	0	0
chr8	79423340	79768911	346	8qC1	Nr3c2	0.041	0.988	349	-1.2	0.27		2			2
chr6	139570408	139916464	346	6qG2	Pik3c2g	0	0	0	-1	0
chr3	26536541	26882134	346	3qA3	Spata16	0	0	0	-0.3	0
chr1	55463231	55808646	345	1qC1.2	Plcl1	0.019	0.637	220	-0.5	0
chr3	109143570	109488616	345	3qF3	Vav3	0.06	1	350	-1.3	0.036		1			1
chr18	69503799	69847621	344	18qE2	Tcf4	0.61	1	345	0.1	0
chr18	31133142	31476944	344	18qB1	Rit2	0.002	0	0	-0.9	0
chr9	67064893	67407510	343	9qC	Tln2	0.342	1	444	1.1	0
chr8	112790876	113134153	343	8qE1	Hydin	0.008	0.189	65	0.6	0
chrX	49625602	49967127	342	XqA5	Gpc3	0.325	1	344	0.9	0
chr17	44914100	45256239	342	17qB3	Supt3h	0.255	1	360	-0.5	0
chr9	81757276	82099614	342	9qE1	Mei4	0.089	0.661	231	-1	0
chr12	37968225	38308789	341	12qA3	Agmo	0	0	0	-0.9	0
chr6	98875331	99216526	341	6qD3	Foxp1	0.899	1	781	0.1	0
chr4	149655754	149996075	340	4qE2	Rere	1.997	1	356	1.6	0
chr15	61869541	62209651	340	15qD1	Pvt1	3.054	1	387	1.3	0
chr9	106795164	107134240	339	9qF1	Dock3	0.343	1	340	1.2	0
chr4	83171448	83510635	339	4qC3	4930473A06Rik	0.108	1	345	1	0
chr11	105451299	105790618	339	11qE1	Tanc2	0.164	1	341	0.5	0
chr6	108163111	108501103	338	6qE1-E2	Itpr1	0.842	1	358	0.8	0
chr6	8209287	8547480	338	6qA1	Gm16039	0.138	0.864	205	-0.8	0
chr11	65644783	65982053	337	11qB3	Dnahc9	0.002	0.055	19	-1.1	0
chrX	95749615	96086364	337	XqC3	Ophn1	0.076	1	361	-0.4	0
chr4	93756266	94092279	336	4qC5	Gm12648	0.002	0	0	-0.9	0
chr11	21905830	22242295	336	11qA3.2	Ehbp1	0.522	0.837	285	0.1	0
chr6	92320885	92656139	335	6qD1	Prickle2	0.037	1	339	0	0
chr4	123026875	123361603	335	4qD2.2	Macf1	3.303	1	341	1.5	0
chr12	62624136	62958915	335	12qC1	Lrfn5	0.021	0.078	26	-0.8	0
chrX	13094205	13428493	334	XqA1.1	Cask	0.49	0.988	356	0.3	0
chr14	64741465	65074740	333	14qD1	Msra	0.151	0.999	338	0.9	0
chr1	156239648	156573049	333	1qG3	Cacna1e	0.023	1	455	-1.3	0
chr6	92890362	93222883	333	6qD1	9530026P05Rik	0.015	0.331	110	-0.2	0
chr2	138082300	138415028	333	2qF3	Btbd3	0.124	0.614	205	-1.1	1			1		1
chr3	141500099	141832389	332	3qH1	Bmpr1b	0.065	0.996	331	-1.2	0
chr14	14117293	14447973	331	14qA1	Synpr	0.006	0.173	62	-1	0
chr18	74600589	74931147	331	18qE2	Myo5b	0.023	0.75	248	0	0
chr6	97236860	97567535	331	6qD3	Frmd4b	0.184	1	333	0.8	1	1				1
chr4	46675189	47004745	330	4qB1	Gabbr2	0.002	0.04	73	0.6	0
chr11	39821695	40151333	330	11qA5	Gm12132	0.006	0.237	39	-1.1	0
chr18	65047409	65377480	330	18qE1	Nedd4l	0.436	1	350	0.1	0
chr1	160292470	160621917	329	1qH1	Astn1	0.008	0.173	88	-1.6	0.04	1				1
chr4	57581050	57909856	329	4qB3	AF064781	0.463	0.996	396	1.4	0
chr18	75979831	76308215	328	18qE3	Zbtb7c	0.179	1	330	1.1	0
chr10	36226619	36554203	328	10qB1	Hs3st5	0.035	0.925	304	0.1	0
chr5	44863371	45190946	328	5qB3	Ldb2	0.001	0	0	-1.4	0
chr5	74600840	74927772	327	5qC3.3	Scfd2	0.393	0.976	305	0.2	0
chr13	58907956	59235331	327	13qB1-B2	Ntrk2	0.016	0.348	73	0	0
chr10	20117809	20444884	327	10qA3	Pde7b	0.002	0	0	0	0
chr9	47338255	47665720	327	9qA5.3	Cadm1	0.749	1	351	-0.3	0
chr11	21472237	21798992	327	11qA3.1	Wdpcp	0.043	0.787	259	-0.7	0
chrX	90550105	90877494	327	XqC3	Pola1	2.176	1	414	0.9	0
chrX	158271227	158597662	326	XqF4	Nhs	0.143	1	329	-0.1	0
chr1	84366415	84692796	326	1qC5	Dner	0.065	1	412	0.8	0
chr1	24268728	24594311	326	1qA5	Col19a1	0.001	0	0	-1.4	0
chr9	45235287	45561343	326	9qA5.2	Dscaml1	0.193	0.892	291	1	0.042		1			1
chr10	58276106	58601664	326	10qB4	Sh3rf3	0.073	0.996	330	-0.5	0
chr2	58674107	58998740	325	2qC1.1	Ccdc148	0.018	0.843	189	0.6	0
chr2	22149129	22473772	325	2qA3	Myo3a	0.006	0	0	-1.1	0
chr9	64233432	64557012	324	9qC	Megf11	0.13	0.995	322	1.2	0
chr5	127722177	128046163	324	5qG1.2	Tmem132c	0.012	0.381	94	0.1	0
chr4	98062475	98386294	324	4qC6	Inadl	0.303	1	331	0.7	0
chr5	48374393	48697521	323	5qB3	Slit2	0.085	1	324	-1	0
chr18	68092910	68415203	322	18qE2	D18Ertd653e	0.543	1	368	0.9	0
chr3	125107008	125427904	321	3qG1	Ndst4	0	0	0	-0.9	0
chr4	153690233	154010982	321	4qE2	Prdm16	0.038	1	326	1.1	0
chrX	166123128	166443668	321	XqF5	Mid1	0.184	1	325	0.7	0
chr1	176431955	176752848	321	1qH3	Fmn2	0.176	1	344	-0.5	0.175		1			1
chr16	63543363	63863984	321	16qC1.3	Epha3	0.004	0.053	17	-1	0
chr14	19406090	19726781	321	14qA2-A3	Ube2e2	0.231	0.999	337	-0.9	0
chr6	43294999	43616277	321	6qB2.1	Tpk1	0.461	0.984	200	-1	0
chr12	119116454	119437516	321	12qF2	Dnahc11	0.01	0.162	27	-0.5	0
chr4	146510386	146831128	321	4qE1	Gm17317	0.272	0.857	205	1.4	0
chr7	150293158	150612955	320	7qF5	Kcnq1	0.715	0.616	106	1.1	0
chr8	46593147	46913259	320	8qB1.1	Sorbs2	0.045	0.627	202	-1.5	0
chr5	66690099	67010067	320	5qC3.1	Apbb2	1.19	1	334	1.4	0
chr11	51763383	52083016	320	11qB1.3	Gm16953	0.351	0.268	64	1.7	0
chr17	44632935	44951746	319	17qB3	Runx2	0.009	0.066	10	-0.7	0
chr5	136724004	137043301	319	5qG2	Cux1	0.778	1	353	1.2	0
chr1	194014665	194334041	319	1qH6	Kcnh1	0.034	0.997	328	0.1	0.227	1				1
chr11	56824888	57143746	319	11qB1.3	Gria1	0.004	0.094	30	-0.8	0
chr4	10407108	10724958	318	4qA1	1700123O12Rik	0.001	0.035	11	0.4	0
chr10	109119715	109437275	318	10qD1	Nav3	0.041	0.468	158	-1	0
chr8	101940541	102257338	317	8qD1	A330008L17Rik	0.003	0.035	11	-1.1	0
chr9	120869385	121186315	317	9qF4	Ulk4	0.043	0.896	246	1	0
chr14	124059192	124374840	316	14qE5	Itgbl1	0.003	0.025	8	-0.8	0
chr13	89913631	90229213	316	13qC3	Xrcc4	0.474	0.864	274	-0.5	0
chr4	87740532	88056915	316	4qC4	BC057079	0.474	1	369	-0.6	0
chr12	13275932	13590616	315	12qA1.1	Nbas	0.349	1	372	0	0
chr11	66025226	66339466	314	11qB3	Shisa6	0.065	1	363	-1.3	0
chr7	70589636	70903914	314	7qC	Otud7a	0.043	0.992	312	0.1	0
chr10	7924550	8238623	314	10qA1	Ust	0.103	1	379	-0.7	0
chr1	177892436	178205443	313	1qH4	Pld5	0.004	0.118	28	-1	0
chr8	115093942	115406617	313	8qE1	Cntnap4	0.029	0.042	13	-1.4	0
chr7	73984620	74297511	313	7qC	Adamts17	0.017	0.514	104	-0.9	0
chr5	140484642	140797506	313	5qG2	Mad1l1	1.078	1	357	1.2	0
chr1	170050129	170362300	312	1qH2.3	Pbx1	0.225	1	316	-1.3	0
chr5	67137073	67448398	311	5qC3.1	Limch1	0.041	1	340	1	0
chr19	55390816	55701797	311	19qD2	Vti1a	0.668	1	315	1.2	0
chr3	58810899	59122332	311	3qD	Med12l	0.094	1	353	-0.9	0
chr2	59737419	60047896	310	2qC1.1	Baz2b	0.445	1	328	1.5	0
chr1	10983545	11293763	310	1qA2	Prex2	0.507	1	359	0.1	0
chrX	137599945	137908619	309	XqF1-F2	Col4a6	0.003	0	0	-0.7	0
chr14	7838650	8147563	309	14qA1	Gm3739	0.011	0.038	4	-1.6	0
chr10	88411739	88720535	309	10qC1	Ano4	0.008	0.375	135	-0.3	0
chr18	15610432	15918666	308	18qA1	Chst9	0.008	0.149	43	-1.2	0
chr7	118615174	118923491	308	7qF1	Galntl4	0.01	0	0	-1.1	0
chr12	51442217	51750210	308	12qB3	Prkd1	0.047	1	327	-1.1	0.22	1				1
chr12	37108105	37416031	308	12qA3	Ispd	0.032	0.75	231	-1.3	0
chr13	98668549	98976120	308	13qD1	Rgnef	0.113	1	325	1.1	0
chr7	117451526	117758436	307	7qF1	Sbf2	0.446	1	308	0.9	0
chr1	46123582	46430395	307	1qC1.1	Dnahc7b	0.004	0	0	-1	0
chr2	135906839	136213703	307	2qF3	Pak7	0.007	0.173	54	-1	0
chrX	140816213	141122723	307	XqF2	Trpc5	0.012	0.023	4	0.5	0
chr15	91098121	91403692	306	15qE3	Slc2a13	0.013	0.056	17	-1	0
chr10	92238363	92544363	306	10qC2	4930485B16Rik	0.005	0.169	52	0.6	0
chr16	57302311	57606979	305	16qC1.1	2610528E23Rik	1.043	1	315	-0.2	0
chr4	24893663	25198246	305	4qA3	Gm11906	0.047	0.239	48	-0.9	0
chr4	6613499	6918704	305	4qA1	Tox	0.029	0.429	131	-1.3	0
chr5	103336966	103640353	303	5qE5	Mapk10	0.007	0.043	13	-0.8	0
chr12	88833273	89135166	302	12qD2	BB287469	0.009	0.128	36	0.3	0
chr18	51277391	51579698	302	18qD1	Prr16	0.004	0.047	15	-1.2	0
chr11	33111793	33413746	302	11qA4	Ranbp17	2.269	1	339	1.3	0
chr6	5675638	5978039	302	6qA1	Dync1i1	0.027	1	328	-0.3	0
chr1	99691690	99992223	301	1qD	Pam	0.143	1	326	-1.1	0
chr6	8898430	9199032	301	6qA1	Nxph1	0.002	0	0	-1.2	0
chr6	102113299	102414661	301	6qD3	Cntn3	0.012	0.256	178	-1.2	0
chr6	56019814	56319628	300	6qB3	Pde1c	0.008	0	0	-1.3	0
chr6	52718790	53018625	300	6qB3	Jazf1	0.039	1	321	0.4	0
chr7	82600419	82899495	299	7qD2	Akap13	1.013	1	305	0.6	0.031		1			1
chr13	10358724	10658139	299	13qA1	Gm16950	0.001	0	0	-1.2	0
chr11	55585589	55884350	299	11qB1.3	Gm12239	0.003	0.08	24	-0.1	0
chr8	90185708	90483494	298	8qC3	Zfp423	1.352	1	379	1.6	0
chr18	25327499	25625822	298	18qA2	AW554918	0.411	1	379	0.8	0
chr3	31801428	32099102	298	3qA3	Kcnmb2	0.004	0.017	5	-0.7	0
chr3	153636399	153934686	298	3qH3-H4	Slc44a5	0.007	0.117	35	0	0
chr12	5084277	5382488	298	12qA1.1	Klhl29	0.028	1	300	0.1	0
chr11	80295627	80593527	298	11qB5	Myo1d	0.187	1	328	1.2	0
chr3	55046447	55342986	297	3qC	Dclk1	0.021	0.592	102	-1.2	0
chr9	49310256	49607027	297	9qA5.3	Ncam1	0.207	0.997	296	-0.2	0
chr13	14318704	14615493	297	13qA1	Hecw1	0.017	0.512	131	-0.1	0
chr11	119464218	119760890	297	11qE2	Rptor	1.242	1	311	1.6	0
chr6	113695662	113992607	297	6qE3	Atp2b2	0.007	0	0	1	0
chr7	63495129	63791887	297	7qB5-C	Oca2	0.002	0.042	191	-0.9	0
chr2	110495357	110791080	296	2qE3	Ano3	0.483	1	315	-1	0
chr5	8072351	8368160	296	5qA1	Adam22	0.286	1	298	-0.2	0
chr11	24326245	24622646	296	11qA3.2	Gm12068	0.002	0	0	-1.4	0
chr15	27660406	27955603	295	15qB1	Trio	0.406	1	307	0.2	0
chr17	49754460	50049172	295	17qC	Kif6	0.011	0.302	81	-0.9	0
chr2	79674609	79969632	295	2qC3	Pde1a	0.008	0.197	58	-1.3	0
chr3	27315083	27610229	295	3qA3	Fndc3b	0.468	1	298	0.1	0
chr11	96325906	96620791	295	11qD	Skap1	0.007	0.098	29	1.5	0
chrX	48740388	49035033	295	XqA5	Hs6st2	0.223	0.995	297	-0.4	0
chr8	79129124	79424520	295	8qC1	Gm10649	0	0	0	-1.3	0
chr15	63920102	64214481	294	15qD1	Asap1	0.541	1	330	0.1	0
chr11	51103421	51397420	294	11qB1.3	Col23a1	0.006	0	0	1.4	0
chr9	118515807	118810121	294	9qF3	Itga9	0.206	1	296	1.1	0
chr12	76919120	77211913	293	12qC3	Syne2	0.104	1	327	1.3	0
chr15	91881595	92172398	291	15qE3	Cntn1	0.004	0	0	-1.2	0
chr15	65826732	66117786	291	15qD1-D2	Kcnq3	0.153	1	310	-0.4	0
chr11	113637687	113928360	291	11qE2	Sdk2	0.005	0	0	1.1	0
chr1	16218754	16510193	291	1qA3	Stau2	0.106	0.916	267	-0.3	0
chr3	134003248	134293729	290	3qG3	Gm16742	0.001	0	0	-1.1	0
chr13	91074953	91363592	289	13qC3	Atg10	0.074	1	328	-0.1	0
chr1	50957490	51244114	287	1qC1.1	Tmeff2	0.034	0.969	267	-1.5	0
chr4	109349192	109636565	287	4qC7	Faf1	3.89	1	311	0.4	0
chr1	172232798	172519992	287	1qH3	Nos1ap	0.101	0.998	294	-0.4	0
chr7	124524492	124811265	287	7qF2	Xylt1	0.099	1	300	-0.4	0
chrX	24786131	25072340	286	XqA2	Gm1993	0	0.01	3	-1.8	0
chr18	13845521	14131242	286	18qA1	Zfp521	0.022	0.99	286	-0.4	0
chr13	40097250	40383380	286	13qA3.3	Ofcc1	0	0	0	-1.1	0
chr16	28160205	28445313	285	16qB2	Fgf12	0.004	0	0	-1	0
chr17	65605344	65890122	285	17qE1.1	Tmem232	0.008	0.171	121	0.5	0
chr3	133618436	133903500	285	3qG3	Gm2078	0.003	0.109	31	-1	0
chr2	127664611	127949609	285	2qF1	Acoxl	0.026	1	288	0.9	0
chr2	142443209	142727267	284	2qG1	Kif16b	0.355	1	297	-1.1	0
chr15	86044876	86328929	284	15qE2	Tbc1d22a	0.367	1	311	0.7	0
chr4	38518699	38802516	284	4qA5	Gm12381	0	0	0	-0.9	0
chr11	29643047	29926033	283	11qA3.3	Eml6	0.04	0.931	266	0.8	0
chr12	32339733	32622495	283	12qA3	Cog5	0.816	1	331	0.5	0
chr16	11984673	12267896	283	16qA1	Shisa9	0	0	0	-1.2	0.375		1			1
chr15	52895592	53177714	282	15qC	Ext1	2.608	1	331	0.1	0
chr19	57107222	57389409	282	19qD2	Ablim1	0.056	0.593	192	0.8	0
chr12	83270406	83552769	282	12qD1	Sipa1l1	0.879	1	295	0.1	0
chr5	93112460	93394344	282	5qE2	Shroom3	0.341	1	322	1.6	0
chr15	71276107	71558268	282	15qD3	Fam135b	0.002	0	0	-1.3	0
chr15	10994544	11276622	282	15qA1	Adamts12	0.004	0	0	-0.3	0
chr18	63868348	64149414	281	18qE1	Wdr7	0.688	1	337	0.4	0
chr1	54702183	54983231	281	1qC1.1	Ankrd44	0.029	1	287	1.2	0
chr4	49072144	49353131	281	4qB1	E130309F12Rik	0.006	0.229	79	-0.9	0
chr2	145760519	146040775	280	2qG1	4930529M08Rik	0.01	0.175	49	0.6	0
chr12	75998203	76278319	280	12qC3	Kcnh5	0.008	0	0	-1.1	0
chr12	20996319	21276032	280	12qA1.2	Asap2	0.171	0.796	176	0.9	0
chr10	3308331	3588035	280	10qA1	Oprm1	0.004	0.157	44	-1	0
chr2	61884518	62164787	280	2qC1.3	Slc4a10	0.003	0	0	-0.5	0
chr15	34805250	35085561	280	15qB3.1	Stk3	0.282	1	287	0.3	0
chr7	89484203	89762960	279	7qD3	Adamtsl3	0.004	0	0	0.1	0
chr10	93774693	94053701	279	10qC2	Tmcc3	0.102	0.302	113	0	0
chr14	100269868	100549015	279	14qE2.3	Klf12	0.984	1	448	0.3	0
chrX	139953133	140232335	279	XqF2	Pak3	0.039	0.721	137	-0.9	0
chrX	46362883	46641436	279	XqA4-A5	Enox2	0.169	1	279	-0.5	0
chr9	103385265	103664167	279	9qF1	Tmem108	0.057	1	289	0.4	0
chr1	129101562	129380281	279	1qE3	Mgat5	0.423	1	290	-0.6	0
chr18	7347959	7626861	279	18qA1	Mpp7	1.017	1	330	-0.3	0
chr7	81420304	81699666	279	7qD2	Slco3a1	0.059	1	292	-1.2	0.031		1			1
chr2	76542036	76820604	279	2qC3	Ttn	0.176	0.375	106	0.8	0
chr1	84989264	85267141	278	1qC5	C130026I21Rik	0.017	0.025	4	-1.4	0
chr4	57447118	57724888	278	4qB3	Palm2	0.07	0.513	396	1.4	0
chrX	38754030	39031778	278	XqA3-A4	Gria3	0.169	0.958	266	-0.5	0
chr4	146120856	146399068	278	4qE1	Gm17452	0.001	0	0	1.6	0
chr7	120909511	121186884	277	7qF1	Spon1	0.013	0.382	106	0.5	0
chr6	119520821	119798168	277	6qF1	Erc1	0.961	1	317	1.1	0
chr17	62953532	63230666	277	17qE1.1	Efna5	0.297	1	289	-0.9	0.051	1				1
chr1	159065313	159342726	277	1qH1	Rasal2	0.829	1	305	1.1	0
chr2	52716893	52993236	276	2qC1.1	Fmnl2	0.98	1	294	0.7	0
chr17	84589395	84865536	276	17qE4	Thada	1.693	1	317	1.4	0
chr2	71819271	72095531	276	2qC3	Rapgef4	0.069	0.865	242	1	0
chr18	25636132	25912484	276	18qA2	Celf4	0.036	0.142	87	0.7	0
chr18	47118514	47393938	275	18qC	Commd10	0.626	0.563	155	0.7	0
chr17	64213363	64488843	275	17qE1.1	Fer	0.489	1	491	0	0
chr7	75097712	75371484	274	7qD1	Igf1r	0.422	1	323	0.4	0
chr12	45429871	45702951	273	12qB3	Nrcam	0.056	1	278	-0.9	0
chr18	40418014	40690757	273	18qB3	Kctd16	0.071	1	295	0	0
chr10	84849558	85123037	273	10qC1	Btbd11	0.246	1	283	1.2	0
chr3	135716326	135989030	273	3qG3	Bank1	0.001	0	0	-1	0
chr11	83943173	84215153	272	11qC	Acaca	1.19	1	289	1.5	0
chr2	146065614	146337762	272	2qG1	Ralgapa2	0.685	1	280	0.7	0
chr2	91933273	92204823	272	2qE1	Phf21a	0.773	0.841	238	1.4	0
chr12	75098747	75368903	270	12qC3	Syt16	0.002	0	0	-0.6	0
chr2	143371891	143642021	270	2qG1	Pcsk2	0.025	0.714	193	0.1	0
chr5	37838066	38108392	270	5qB3	Stk32b	0.007	0	0	-0.2	0
chr16	37115027	37385048	270	16qB3	Stxbp5l	0.026	1	277	-0.4	0
chr6	21935915	22206404	270	6qA3.1	A430107O13Rik	0.017	0.209	49	-0.2	0
chr3	64913305	65182145	269	3qE1	Kcnab1	0.001	0	0	0.1	0
chr16	77329503	77598776	269	16qC3.1	2810055G20Rik	0.005	0	0	-1.1	0
chr6	32740975	33010260	269	6qA3.3	Chchd3	1.771	1	414	-0.3	0
chr3	154449265	154718371	269	3qH4	Tnni3k	0.001	0	0	-1.1	0
chr4	85160230	85429031	269	4qC4	Gm12680	0.126	1	540	-0.7	0
chr13	24104212	24372664	268	13qA3.1	Lrrc16a	0.628	1	317	-0.2	0.068	1				1
chr8	79774264	80041806	268	8qC1	Arhgap10	0.415	1	280	-0.2	0.108		1			1
chr19	17030607	17298422	268	19qB	Prune2	0.314	0.661	89	0	0
chr15	55470397	55738504	268	15qD1	Sntb1	0.047	0.746	115	0.3	0
chr9	71692058	71959626	268	9qD	Tcf12	0.809	1	279	0.3	0
chr15	28133506	28401800	268	15qB1	Dnahc5	0.002	0	0	-0.7	0
chr3	136333087	136600691	268	3qG3	Ppp3ca	0.568	1	283	-1.3	0
chr18	75178425	75446620	268	18qE3	Dym	0.531	1	349	1.5	0
chr13	15555067	15821859	267	13qA1	Gli3	0.674	1	269	-1.1	0
chr12	58331411	58598186	267	12qC1	Mipol1	0.83	1	293	-0.4	0.343		1			1
chr2	103983229	104250491	267	2qE2	D430041D05Rik	0.01	0.176	131	0.9	0
chr10	122115817	122382851	267	10qD2	Ppm1h	0.068	1	269	0.3	0
chr19	32197216	32464204	267	19qC1	Sgms1	1.146	1	329	0.9	0
chr1	66221846	66489157	267	1qC3	Mtap2	0.273	1	270	-1.2	0
chr4	17780039	18046292	266	4qA3	Mmp16	0.027	1	275	-1.1	0
chr18	75590877	75857350	266	18qE3	Ctif	0.084	0.997	266	1.4	0
chr15	3267759	3533492	266	15qA1	Ghr	0.231	1	267	-0.6	0
chr3	152377063	152643372	266	3qH3	Pigk	0.135	0.557	150	-0.6	0.126		1			1
chr10	121218046	121484371	266	10qD2	Srgap1	0.135	1	272	0.1	0
chr11	61770280	62036515	266	11qB2	Specc1	0.313	1	297	1.1	0
chr1	81073524	81338339	265	1qC5	9430031J16Rik	0.001	0	0	-1.3	0
chr13	96397131	96661877	265	13qD1	Iqgap2	0.187	1	275	0.9	0
chr7	96288232	96552732	265	7qE1	Tmem135	0.909	0.784	226	-0.7	0
chr6	48080916	48345407	264	6qB2.3	Gm16630	0.01	0.162	48	0.5	0
chr17	81785358	82048947	264	17qE3	Slc8a1	0.009	0.157	58	-1.5	0
chr4	87415828	87679268	263	4qC4	Mllt3	0.226	1	267	-0.7	0.052	1				1
chr11	107069205	107332034	263	11qE1	Pitpnc1	1.798	1	291	1.7	0
chr6	4853003	5115661	263	6qA1	Ppp1r9a	0.688	1	282	1.1	0
chr11	41523843	41786619	263	11qA5	A230004M16Rik	0	0	0	-0.7	0
chr9	23027519	23289646	262	9qA3	Bmper	0.003	0	0	-1.3	0
chr4	18787600	19049673	262	4qA3	Cnbd1	0.006	0	0	-0.7	0
chr18	88834615	89096873	262	18qE4	Socs6	0.318	0.797	209	-0.6	0
chr2	121371264	121632823	262	2qE5	Frmd5	0.363	1	277	1.7	0
chr6	53989547	54251804	262	6qB3	Chn2	0.202	0.989	285	0.2	0
chr2	68048501	68310325	262	2qC1.3	Stk39	0.041	0.993	265	-0.8	0
chr14	5356913	5618529	262	14qA1	Gm3383	0	0	0	NULL	0
chr1	194336709	194597413	261	1qH6	Hhat	0.02	1	353	0	0
chr17	5492599	5753891	261	17qA1	Zdhhc14	0.041	1	266	0.6	0
chr19	38598686	38859588	261	19qC3	Plce1	0.089	1	311	1.4	0
chr16	94086060	94347498	261	16qC4	Sim2	0.001	0	0	1.7	0
chr19	24369283	24630362	261	19qB	Pip5k1b	0.151	1	280	1	0
chr10	12933200	13194202	261	10qA2	Phactr2	0.055	0.997	281	-0.6	0
chr2	154617137	154876748	260	2qH1	a	1.464	0.472	117	1.4	0
chr3	144955435	145214975	260	3qH2	Col24a1	0.002	0	0	-0.2	0
chr14	3677733	3936396	259	14qA1	Gm3002	0.103	0.058	22	NULL	0
chr10	50312474	50571008	259	10qB3	Ascc3	1.13	1	272	-1	0
chr2	135151182	135409320	258	2qF3	9630028H03Rik	0.02	0.178	46	0.8	0
chr3	99689328	99947245	258	3qF2.2	Spag17	0.002	0.039	11	-1.1	0
chr16	15889319	16146944	258	16qA2	2310008H04Rik	0.929	1	284	0.9	0
chr10	115455268	115711988	257	10qD2	Ptprr	0.001	0.023	6	-1	0
chr18	33098694	33355421	257	18qB1	Camk4	0.015	0.412	103	-1.1	0
chr5	22056254	22313668	257	5qA3	1700030G06Rik	0.058	0.459	119	0	0
chr18	66204955	66462393	257	18qE1	Ccbe1	0.013	0.602	155	0.6	0
chr1	80497647	80755128	257	1qC4	Dock10	0.017	0.59	116	-1.2	0
chr13	18216793	18473872	257	13qA2	Pou6f2	0.006	0	0	-0.7	0
chrX	153596617	153853244	257	XqF4	Phex	0.042	1	273	0.3	0
chr18	37089938	37347311	257	18qB2-B3	Pcdha1	0.016	0.912	237	0	0
chr16	34745295	35002520	257	16qB3	Mylk	0.008	0	0	-0.1	0
chr14	121941260	122196956	256	14qE5	Dock9	0.382	1	266	1.2	0
chr9	6928502	7184446	256	9qA1	Dync2h1	0.329	1	367	-0.6	0.171		1			1
chr16	70314193	70569961	256	16qC2	Gbe1	0.214	1	258	-0.9	0.088	1				1
chr9	36698569	36954899	256	9qA4	Pknox2	0.021	1	261	1.5	0
chr19	33212236	33466785	255	19qC1	Rnls	0.029	1	269	-0.2	0
chr12	100433212	100688284	255	12qE	Foxn3	1.079	1	416	0.9	0
chr19	16207320	16461953	255	19qA	Gnaq	0.769	0.999	266	0.7	0
chr2	169459145	169714003	255	2qH3	Gm16898	0.004	0.084	25	0.4	0
chr15	58341602	58595425	254	15qD1	Fer1l6	0.001	0	0	0.2	0
chr7	106035252	106289654	254	7qE2	Uvrag	0.819	1	272	1.1	0
chr2	117683026	117936938	254	2qE5	Gm13986	0.004	0.053	156	-1	0
chr4	100449279	100701825	253	4qC6	Cachd1	0.374	1	275	-0.4	0
chr2	68699497	68952339	253	2qC2	Lass6	0.418	1	257	0.9	0
chr7	71646591	71898756	252	7qC	Apba2	0.039	1	257	-0.4	0
chr8	86912338	87164145	252	8qC3	Cacna1a	0.45	1	308	1.8	0
chr15	42256272	42508523	252	15qB3.1	Angpt1	0.007	0.21	53	-1	0
chr17	30761298	31012209	251	17qA3.3	Dnahc8	0.322	1	288	1.6	0
chr6	141197789	141447872	250	6qG2	Pde3a	0.014	0.897	191	-1	0
chr1	154363888	154613481	250	1qG3	Rgl1	0.037	1	255	1.5	0
chrX	57810902	58061168	250	XqA6	Gm14661	0.002	0.04	10	-0.6	0
chr6	17642932	17893025	250	6qA2	St7	0.208	0.998	254	0.2	0
chr6	145313653	145562839	249	6qG3	Ifltd1	0.003	0.084	11	0.4	0
chr14	121434421	121682966	249	14qE5	Farp1	0.231	0.996	252	0.9	0
chr3	126299219	126547972	249	3qG1-G2	Camk2d	0.199	0.999	254	-1.2	0
chr19	27836210	28085656	249	19qC1	Rfx3	0.383	1	254	-0.6	0
chr18	12492532	12741522	249	18qA1	Lama3	0.033	0.406	94	0.9	0
chr2	52283844	52532350	249	2qC1.1	Cacnb4	0.019	0.692	141	0.9	0
chr4	84530212	84777825	248	4qC4	Cntln	0.02	1	249	0.3	0
chr9	80849042	81097197	248	9qE1	Gm17255	0	0	0	-0.9	0
chr1	84032867	84281220	248	1qC5	Pid1	1.132	1	293	-0.6	0
chr16	94970872	95219303	248	16qC4	Kcnj6	0.002	0	0	0.7	0
chr8	111238543	111485521	247	8qD3	Zfhx3	0.811	1	282	0.6	0
chr4	86629027	86876381	247	4qC4	Slc24a2	0.007	0.214	37	0.2	0
chr16	91684642	91931932	247	16qC3-C4	Atp5o	0.247	0.266	72	1.5	0
chr1	160641861	160887870	246	1qH1	Pappa2	0.001	0	0	-1.3	0
chr9	76949890	77195677	246	9qD	2310046A06Rik	0.004	0	0	-1.1	0
chr10	22823973	23069701	246	10qA3	Eya4	0.022	1	249	-1.3	0
chr6	95423005	95668792	246	6qD2	Suclg2	0.967	1	287	-1	0
chr1	44608355	44853678	245	1qC1.1	Gulp1	0.069	1	266	-1.4	0
chr14	42660347	42904201	244	14qB	Gm7995	0	0	0	-1.6	0
chr18	23573915	23818215	244	18qA2	Dtna	0.123	0.666	164	-0.3	0
chr3	69120782	69364724	244	3qE1	Ppm1l	0.234	1	249	0	0
chr11	77029788	77273722	244	11qB5	Ssh2	0.344	1	247	1.4	0
chr19	33592229	33836441	244	19qC1	Lipo1	0.036	0.36	44	-1	0
chr9	8994952	9239026	244	9qA1	Arhgap42	0.543	1	251	0.5	0
chr8	77114885	77357846	243	8qC1	Gm11033	0.005	0.125	32	-0.2	0
chr3	65857482	66100759	243	3qE1	Veph1	0.029	0.304	71	-0.3	0
chr13	91599887	91843034	243	13qC3	Ssbp2	0.149	0.993	254	-0.5	0
chrX	99044723	99287394	243	XqD	Nhsl2	0.019	0.419	112	1.1	0
chr10	42941291	43184688	243	10qB2	Pdss2	0.831	1	258	1.2	0
chr11	79153194	79395114	242	11qB5	Nf1	0.751	0.999	251	1.6	0
chr1	133181827	133423938	242	1qE4	Srgap2	2.078	0.998	247	1.2	0
chr11	67779694	68020650	241	11qB3	Stx8	0.48	1	248	0.5	0
chr12	118754951	118995451	241	12qF2	Rapgef5	0.276	0.931	279	0.5	0
chr16	50191956	50432503	241	16qB5	Bbx	2.324	1	306	0.1	0
chr5	9485235	9725352	240	5qA1	Grm3	0.002	0	0	-1.2	0
chr4	24539700	24778271	239	4qA3	Klhl32	0.017	0.817	117	-0.6	0
chr6	103460869	103699671	239	6qE1	Chl1	0.019	0.514	124	-0.8	0
chr11	74739324	74977950	239	11qB5	Smg6	1.281	1	240	1.7	0
chr17	43938799	44176465	238	17qB3	Rcan2	0.027	0.947	227	-0.2	0
chr5	24368561	24606460	238	5qA3	Prkag2	0.062	0.819	196	1.3	0
chr18	10325174	10562932	238	18qA1	Greb1l	0.09	1	239	0.4	0
chr7	64845887	65084172	238	7qC	Gabrb3	0.43	0.997	259	-1	0
chr9	40100817	40338968	238	9qA5.1	Gramd1b	0.312	0.692	330	1.3	0
chr1	178950203	179188334	238	1qH4	Akt3	0.337	1	268	-1.1	0
chr2	32988940	33227006	238	2qB	Ralgps1	0.245	1	240	1.4	0
chr14	46374363	46612845	238	14qC1	Gm15218	0.003	0.013	3	0	0
chrX	5976971	6214566	238	XqA1.1	Shroom4	0.307	1	284	-0.7	0
chr15	71626224	71864657	238	15qD3	Col22a1	0.035	0.735	176	-1.1	0
chr12	78340051	78577325	237	12qC3	Fut8	0.487	1	336	0.1	0
chr5	11184169	11421235	237	5qA1	Gm8897	0	0	0	-1.4	0
chr5	102261971	102498940	237	5qE4-E5	Wdfy3	1.032	1	257	0.5	0
chr10	70385579	70622448	237	10qB5.3	Bicc1	0.028	1	237	0.4	0
chr12	4247362	4484060	237	12qA1.1	Ncoa1	0.577	1	239	1.5	0
chr5	73411429	73647857	236	5qC3.2	Fryl	1.046	1	245	1.2	0
chr2	101790359	102026542	236	2qE2	Ldlrad3	0.672	1	276	0.3	0
chr14	9263705	9498754	235	14qA1	4930452B06Rik	0.258	0.999	236	0.1	0
chr15	50486306	50721587	235	15qC	Trps1	1.825	1	270	0.5	0
chr12	104187068	104422208	235	12qE	Unc79	0.047	0.998	238	0.2	0
chr18	59335054	59570100	235	18qD3	Chsy3	0.01	0.362	85	-1.1	0
chrX	143397055	143631820	235	XqF2	Htr2c	0	0	0	-0.5	0
chr1	13129185	13364164	235	1qA3	Ncoa2	0.577	0.997	246	1.7	0
chr11	67268938	67502492	234	11qB3	Gas7	0.055	1	235	-0.5	0
chr6	133985717	134220176	234	6qG1	Etv6	0.988	1	310	1.3	0
chr15	57075321	57309180	234	15qD1	Slc22a22	0.006	0.167	39	-0.9	0
chr2	59450098	59684206	234	2qC1.1	Tanc1	2.203	1	301	1.3	0
chr7	144086293	144319870	234	7qF4	Mgmt	1.138	1	272	-0.1	0
chr4	64785207	65018543	233	4qC1	Pappa	0.005	0	0	-1.2	0
chr2	139659215	139892541	233	2qF3	Tasp1	0.97	1	356	0.7	0
chr11	8331654	8564538	233	11qA1	Tns3	3.898	1	258	1.4	0
chr2	128021728	128255085	233	2qF1	Gm14005	0.175	0.962	225	1.2	0
chr9	105064796	105297854	233	9qF1	Nek11	0.01	0.057	114	-0.8	0
chr18	35426053	35658579	233	18qB1-B2	Sil1	0.45	1	271	1.6	0
chr14	103512627	103746031	233	14qE2.3	Mycbp2	0.754	1	249	-0.2	0
chr4	102413901	102646233	232	4qC6	Sgip1	0.054	0.762	177	-0.7	0
chr5	69500523	69732948	232	5qC3.1	Kctd8	0.012	0.355	100	-1	0
chr1	66514940	66746440	232	1qC3	Unc80	0.008	0.456	66	-0.1	0
chrX	158849885	159081581	232	XqF4	Reps2	0.078	1	267	0.7	0
chr5	14025275	14256689	231	5qA1	Sema3e	0.865	1	348	0.2	0
chr13	20885987	21116121	230	13qA2	Aoah	0.562	0.402	106	0.7	0
chr4	19207996	19437770	230	4qA3	Cngb3	0.002	0.039	9	-0.7	0
chr12	87165622	87394710	229	12qD2	Ttll5	0.542	1	258	1.2	0
chr2	35606760	35835433	229	2qB	Ttll11	0.005	0	0	0.8	0
chr7	79222717	79451481	229	7qD1	Mctp2	0.794	1	242	-0.1	0
chr6	112667964	112897260	229	6qE3	Srgap3	0.167	1	232	1.2	0
chr6	96781202	97010405	229	6qD3	Fam19a4	0.089	1	230	0.5	0
chr5	68009378	68238671	229	5qC3.1	Atp8a1	0.437	1	249	-0.2	0
chr11	12136610	12364963	228	11qA1	Cobl	1.741	1	261	0.9	0
chr6	101099600	101327891	228	6qD3	Pdzrn3	0.079	1	235	-1.3	0
chr12	33832557	34060524	228	12qA3	Atxn7l1	0.309	1	232	0.9	0
chr14	49918193	50145721	228	14qC1	Slc35f4	0.018	0.299	56	0.4	0
chr8	85387254	85615170	228	8qC2	Rnf150	0.01	0.097	19	0	0
chr15	76909419	77137483	228	15qD3-E1	Rbfox2	2.754	1	307	1.6	0
chr7	104230260	104457450	227	7qE1	Gab2	0.034	1	228	0.7	0
chr7	119822831	120050321	227	7qF1	Tead1	3.362	1	242	1.4	0
chr15	59205752	59433238	227	15qD1	Nsmce2	1.527	1	274	1.6	0
chr1	106665105	106892058	227	1qE2.1	Cdh20	0.004	0	0	-1	0
chr10	6379237	6606177	227	10qA1	Plekhg1	0.512	1	243	1	0
chr16	95580775	95808200	227	16qC4	Erg	0.007	0	0	-0.2	0
chr13	110844394	111071109	227	13qD2.2	Rab3c	0.005	0	0	-0.4	0
chr5	24777611	25004601	227	5qA3	Mll3	1.183	1	247	1.4	0
chr15	7823054	8049209	226	15qA1	Wdr70	1.225	1	263	0.6	0
chr13	95794408	96020291	226	13qD1	Pde8b	0.011	0.173	39	0.7	0
chr4	116944067	117169657	226	4qD1-D2	Rnf220	0.348	1	228	1.4	0
chr2	58419708	58645382	226	2qC1.1	Upp2	0.012	0.297	67	0.3	0
chr14	33772732	33998694	226	14qB	Wdfy4	0.005	0	0	-0.8	0
chr8	93352733	93578407	226	8qC5	Chd9	3.702	1	269	1.4	0
chr8	81033233	81257904	225	8qC1	Slc10a7	1.51	1	258	1.2	0
chr2	10292136	10516880	225	2qA1	Sfmbt2	1.771	1	242	0.2	0
chr16	92601711	92826311	225	16qC4	Runx1	0.032	0.444	103	-0.6	0
chr17	6356795	6582266	225	17qA1	Gm2792	0.038	0.355	74	1.8	0
chr14	118881913	119105441	224	14qE4	Abcc4	2.224	1	276	1.2	0
chrX	69678019	69902187	224	XqA7.3	Gabra3	0.017	0.812	182	-0.8	0
chr17	13675418	13898832	223	17qA1	Tcte2	0.166	0.886	195	0.8	0
chr15	64530603	64753858	223	15qD1	Adcy8	0.002	0.114	27	-1	0
chr4	125167943	125391417	223	4qD2.2	Grik3	0.47	1	225	1.2	0
chr14	47502528	47725492	223	14qC1	Samd4	0.193	1	227	0.4	0
chrX	154259367	154481249	222	XqF4	Cnksr2	0.049	1	230	-0.2	0
chr16	21423190	21644753	222	16qB1	Vps8	0.232	1	230	0.7	0
chr10	13366859	13588786	222	10qA2	Aig1	0.131	1	225	-0.8	0
chr3	105255247	105476920	222	3qF2.2	Kcnd3	0.001	0	0	-0.3	0
chr3	114606995	114828640	222	3qF3	Olfm3	0.001	0	0	-0.8	0
chr7	96780901	97002869	222	7qE1	Me3	0.007	0.011	3	0.8	0
chr4	144562525	144784898	222	4qE1	Vps13d	0.647	1	289	1.2	0
chr12	45953474	46175480	222	12qB3	Stxbp6	0.131	1	239	-1	0
chr1	108068328	108290827	222	1qE2.1	Phlpp1	0.373	0.999	224	-0.9	0
chr12	102642882	102864219	221	12qE	Catsperb	0.001	0	0	-0.7	0
chr14	122580915	122801454	221	14qE5	Clybl	0.27	1	222	1.6	0
chrX	99479977	99700698	221	XqD	Hdac8	0.151	1	223	0.8	0
chr4	9375215	9596491	221	4qA1	Asph	0.621	1	222	-0.9	0
chr2	37338747	37559379	221	2qB	Strbp	1.053	0.965	217	0.9	0
chrX	98033986	98255006	221	XqC3	Tex11	0.085	1	235	0.8	0
chrX	92907016	93127831	221	XqC3	Zc3h12b	0.06	1	262	0	0
chr18	16747385	16967755	220	18qA1	Cdh2	0.277	0.999	242	-1.1	0
chr14	102129144	102349230	220	14qE2.3	Lmo7	0.224	0.979	217	0.3	0.648	1				1
chr1	120285634	120506009	220	1qE2.3	Clasp1	1.083	1	239	1.6	0
chr19	58310093	58530399	220	19qD2	Gfra1	0.014	0.365	78	-1.1	0
chr8	88364857	88585275	220	8qC3	Phkb	1.097	1	254	0	0
chr12	101538980	101759032	220	12qE	Ttc7b	0.662	1	222	1.5	0
chr2	177853679	178073197	220	2qH4	Phactr3	0.014	0.3	87	0.4	0
chr16	57353205	57573239	220	16qC1.1	Filip1l	0.019	0.112	26	-0.3	0
chr3	52845449	53065601	220	3qC	Lhfp	0.097	1	237	-0.4	0
chr4	139582760	139802699	220	4qD3	Igsf21	0.076	1	225	1.3	0
chr11	89282300	89500945	219	11qC	Ankfn1	0.003	0	0	-0.7	0
chr17	47277890	47496407	219	17qC	Trerf1	0.405	0.997	221	1.6	0
chr16	84954684	85173952	219	16qC3.3	App	0.188	1	222	0	0
chr6	138311438	138530489	219	6qG1	Lmo3	0	0	0	-1	0
chr14	70240226	70459693	219	14qD2	Pebp4	0.001	0	0	1.4	0
chr19	40369538	40588269	219	19qC3	Sorbs1	0.539	1	242	0.7	0
chr1	120730708	120950196	219	1qE2.3	Gli2	1.085	1	298	1.6	0
chr9	23902439	24120842	218	9qA3-A4	Npsr1	0.015	0.234	51	-1.1	0
chr12	56703915	56922154	218	12qC1	Ralgapa1	0.813	1	220	1	0
chr2	34262290	34480470	218	2qB	Mapkap1	0.681	1	220	1.2	0
chr4	93119948	93337761	218	4qC5	Gm12649	0	0	0	-0.9	0
chr15	73035534	73253621	218	15qD3	Ptk2	1.479	1	229	1.5	0
chr13	48139599	48357992	218	13qA5	A330033J07Rik	0.006	0	0	0.9	0
chr6	114593148	114810431	217	6qE3	Atg7	0.287	1	232	0.9	0
chr12	91991647	92208208	217	12qD3	4930544I03Rik	0.009	0.114	457	-0.9	0
chr18	58996417	59213332	217	18qD3	Adamts19	0.051	1	252	-1.1	0
chr17	73842567	74059793	217	17qE2	Galnt14	0.025	0.999	217	-1	0
chr9	56048937	56265857	217	9qB	C230081A13Rik	1.236	1	228	1	0
chr17	89384291	89600015	216	17qE5	Fshr	0	0	0	-1.2	0
chr5	77086707	77302579	216	5qC3.3	C530008M17Rik	0.074	1	221	0.8	0
chr1	93829333	94044970	216	1qD	Hdac4:2	1.37	1	281	0.6	0
chr2	13197964	13413551	216	2qA1	Cubn	0.027	0.99	218	-0.6	0
chr5	9266117	9481825	216	5qA1	9330182L06Rik	0.03	0.98	213	-1	0
chr1	33510655	33726631	216	1qB	Prim2	1.166	1	513	1	0
chr4	137548936	137764423	215	4qD3	Eif4g3	1.238	1	224	1.5	0
chr12	53198723	53413731	215	12qC1	Nubpl	0.25	1	240	1.1	0
chr15	87374903	87589766	215	15qE3	Fam19a5	0.142	1	244	-0.9	0
chr10	28388165	28603624	215	10qA4	Themis	0.099	1	230	-0.8	0
chr10	55734103	55948495	214	10qB3-B4	D630037F22Rik	0.283	1	217	-0.3	0
chr1	141701944	141915481	214	1qF	Cfhr2	0.006	0.052	11	-1.1	0
chr1	73956804	74171021	214	1qC3	Tns1	0.135	1	337	1.4	0
chr14	64225339	64439248	214	14qD1	Xkr6	0.689	0.999	254	0.8	0
chr9	63011575	63225659	214	9qC	Map2k5	0.656	1	229	0.9	0
chrX	137909927	138123778	214	XqF2	Col4a5	0.011	0	0	-0.6	0
chr13	35751730	35965933	214	13qA3.3	Cdyl	2.541	0.637	174	0.8	0
chr6	97757051	97971352	214	6qD3	Mitf	0.147	1	223	0.5	1	1				1
chr6	89333139	89545646	213	6qD1	Chchd6	0.245	1	234	0.4	0
chr1	140860012	141072620	213	1qF	Dennd1b	1.217	1	249	-0.1	0
chr11	42233258	42446092	213	11qA5	Gabrb2	0.004	0	0	-1.2	0
chr11	102724650	102937217	213	11qE1	Gm17536	0.566	0.253	74	1.6	0
chr2	60588249	60801261	213	2qC1.2	Rbms1	0.81	1	238	-0.9	0
chr15	55139304	55352358	213	15qD1	Col14a1	0.004	0.053	232	1.3	0
chrX	28589914	28802238	212	XqA3.1	Gm7421	0	0	0	NULL	0
chr1	192524080	192735649	212	1qH6	Rps6kc1	0.354	0.7	148	0.8	0
chr16	56477956	56690241	212	16qC1.1	Abi3bp	0.015	0.301	64	-0.5	0
chr6	137200819	137413150	212	6qG1	Ptpro	0.003	0	0	0.1	0
chr6	148180951	148392911	212	6qG3	Tmtc1	0.276	1	216	0.1	0
chr1	157923095	158135156	212	1qG3	Fam163a	0.004	0	0	1	0
chr3	64436784	64648665	212	3qE1	Vmn2r-ps11	0	0	0	-1.2	0
chr9	45820902	46032277	211	9qA5.2	Sik3	1.139	1	213	1.5	0
chr18	33955980	34166860	211	18qB1	Epb4.1l4a	1.029	1	213	1.6	0
chr4	97234823	97444769	210	4qC6	E130114P18Rik	0	0	0	-1	0
chr10	82448242	82658645	210	10qC1	Chst11	0.061	0.999	220	0.9	0
chrX	72418053	72627954	210	XqA7.3	F8	0.165	0.936	196	0.6	0
chr9	6168611	6378843	210	9qA1	Pdgfd	0.03	0.546	116	-1.1	0
chr18	7088230	7297899	210	18qA1	Armc4	0.002	0	0	-1.1	0
chrX	157222239	157432634	210	XqF4	Cdkl5	0.406	1	238	-0.5	0
chr16	31663528	31873436	210	16qB2	Dlg1	2.204	1	218	1.3	0
chr6	38825402	39034584	209	6qB1	Tbxas1	0.019	0.014	3	1	0
chr12	3572380	3781796	209	12qA1.1	Dtnb	0.643	1	215	1.4	0
chr18	77743694	77952749	209	18qE3	8030462N17Rik	1.839	0.866	120	1.6	0
chr5	90102865	90312359	209	5qE1	Adamts3	0.027	1	265	-1.4	0
chr8	18595130	18803189	208	8qA1.3	Mcph1	2.27	1	252	1.1	0
chr14	51981430	52189657	208	14qC1-C2	Gm7247	0.005	0.259	43	-1	0
chr14	26278670	26486229	208	14qA3	Zmiz1	0.116	1	212	1.1	0
chr8	127578094	127785758	208	8qE2	Disc1	0.057	0.834	180	0.9	0
chr4	34896322	35104733	208	4qA5	Mobkl2b	0.229	1	246	1.5	0
chr10	19654277	19862559	208	10qA3	Map3k5	0.14	1	215	0.8	0
chr4	114079328	114287703	208	4qD1	Gm12824	0.018	0.811	169	-1.1	0
chr16	25683848	25892188	208	16qB1	Trp63	0.002	0	0	-0.8	0
chr13	105077952	105284843	207	13qD1	Adamts6	0.098	1	212	-0.1	0
chr2	105537476	105744721	207	2qE3	Elp4	0.454	1	209	-0.1	0
chr5	113117895	113325382	207	5qF	Myo18b	0.015	0.602	125	0.4	0
chrX	145532494	145739546	207	XqF3	Gm15093	0	0	0	NULL	0
chr17	44744479	44951746	207	17qB3	AC165141.1	0.008	0.048	10	-0.7	0
chr13	95128914	95336271	207	13qD1	Ap3b1	1.413	1	316	0.8	0
chr2	125126329	125333729	207	2qF1	Fbn1	0.046	1	212	-0.3	0
chr3	103817181	104024297	207	3qF2.2	Magi3	0.423	1	230	0.3	0
chr2	81893378	82100036	207	2qD	Zfp804a	0.006	0.175	37	-0.9	0
chr11	74196857	74403688	207	11qB5	Rap1gap2	0.125	1	228	1.4	0
chr16	45746345	45953711	207	16qB5	Phldb2	0.148	1	208	-0.8	0
chr1	178744790	178950568	206	1qH4	Sdccag8	0.244	1	241	-1	0
chr4	43071824	43277745	206	4qA5	Unc13b	0.373	1	210	1.3	0
chr11	76230235	76435816	206	11qB5	Abr	0.453	1	226	1.5	0
chr5	12383165	12588943	206	5qA1	Sema3d	0.015	0.296	61	-0.9	0
chr1	153731653	153937450	206	1qG2	1700025G04Rik	0.154	1	210	0	0
chr14	6541986	6748430	206	14qA1	Gm3358	0	0	0	NULL	0
chr16	52249108	52454187	205	16qB5	Alcam	0.032	0.997	207	-1	0
chr1	181890602	182095734	205	1qH4	Cdc42bpa	0.713	1	208	0.9	0
chr3	152125778	152331104	205	3qH3	Ak5	0.009	0	0	0.9	0
chr17	30142031	30346964	205	17qA3.3	Zfand3	1.207	1	230	1.2	0
chr5	72691263	72895779	205	5qC3.2	Corin	0.004	0.044	9	-0.4	0
chr11	50415585	50621075	205	11qB1.3	Adamts2	0.033	0.996	207	0.5	0
chr5	119010727	119215444	205	5qF	Med13l	1.985	1	218	1.5	0
chr8	119780918	119985403	204	8qE1	4933407C03Rik	1.429	1	241	1.7	0
chr6	72967599	73171645	204	6qC1	Dnahc6	0.019	0.23	47	1.4	0
chr2	38578889	38783208	204	2qB	Nr6a1	1.396	1	213	1.2	0
chr16	15637958	15842332	204	16qA2	Prkdc	0.901	1	238	1.1	0
chr19	47334663	47538901	204	19qC3-D1	Sh3pxd2a	0.6	1	228	1.1	0
chr7	133021932	133225925	204	7qF3	Gsg1l	0.006	0.015	3	1.3	0
chr4	117604758	117807519	203	4qD2.1	St3gal3	0.504	1	205	1.6	0
chr19	60965651	61168456	203	19qD3	Grk5	0.189	1	215	1.1	0
chr19	25074018	25276922	203	19qB	Dock8	0.011	0.187	38	0.1	0
chr13	19040239	19242782	203	13qA2	Amph	0.153	1	208	-0.5	0
chr10	106954415	107157083	203	10qD1	Ptprq	0	0	0	-0.9	0
chr2	115688799	115891575	203	2qE4-E5	Meis2	0.119	1	226	0.1	0
chr3	63500158	63703377	203	3qE1	Plch1	0.218	1	206	-0.6	0
chr2	51992166	52194318	202	2qC1.1	Neb	0.026	1	213	1.1	0
chr2	34026976	34228660	202	2qB	Pbx3	0.471	1	227	0.5	0
chr5	145005305	145207626	202	5qG2	Bri3	0.104	0.49	99	1.2	0
chr6	83958583	84161054	202	6qC3	Dysf	0.27	1	212	1.1	0
chr6	87083847	87285769	202	6qD1	Antxr1	0.041	1	213	0.5	0
chr7	21356582	21557259	201	7qA3	Vmn1r112	0	0	0	NULL	0
chrX	26162068	26362823	201	XqA2	Gm6121	0	0.015	3	-1.7	0
chr18	58168276	58369580	201	18qD3	Fbn2	0.007	0	0	-1.3	0
chr1	136651234	136852519	201	1qE4	Ppp1r12b	0.453	1	216	1.2	0
chr16	10545456	10744971	200	16qA1	Clec16a	0.519	1	218	0.9	0
chr2	130531935	130732142	200	2qF1	4930402H24Rik	0.262	0.845	134	1.5	0
chr10	76224601	76424632	200	10qC1	Pcbp3	0.411	0.999	209	1.4	0
chr15	4325490	4525553	200	15qA1	Plcxd3	0.018	0.765	180	-0.9	0
chr16	48431349	48631018	200	16qB5	Morc1	1.159	1	227	1.1	0
chr4	107107195	107307666	200	4qC7	Glis1	0.046	0.974	195	0.8	0
chr15	83697141	83895809	199	15qE2	Efcab6	0.007	0.183	78	1.2	0
chr11	28285684	28484324	199	11qA3.3	Ccdc85a	0.442	1	228	-1	0
chrX	51743325	51942196	199	XqA5	Gm16430	0	0	0	NULL	0
chr3	97493755	97692630	199	3qF2.2	Pde4dip	0.061	1	208	0.8	0
chr18	80931815	81130797	199	18qE3	Atp9b	1.132	1	204	0	0
chr12	30859346	31058240	199	12qA2	Sntg2	0.006	0.139	21	-1.1	0
chr9	83818756	84017846	199	9qE2	Bckdhb	0.486	1	213	-0.2	0
chr8	111599121	111797711	199	8qD3	D030068K23Rik	0.194	1	213	0	0
chr18	4920537	5119297	199	18qA1	Svil	0.564	1	201	-0.6	0
chrX	161566948	161765325	198	XqF5	Glra2	0.004	0.025	5	-0.7	0
chr19	25311464	25508987	198	19qB	Kank1	0.323	1	212	1	0
chr4	14879391	15076941	198	4qA2	Necab1	0.065	0.998	215	-0.8	0
chr17	50131581	50329999	198	17qC	Rftn1	0.04	1	223	-1	0
chr9	80161136	80359045	198	9qE1	Impg1	0.002	0.056	11	-1	0
chr2	115407451	115604504	197	2qE4	BC052040	1.251	1	222	-0.5	0
chr1	196446022	196643063	197	1qH6	Plxna2	0.045	1	200	-1.4	0
chr10	39088660	39285187	197	10qB1	Fyn	0.351	0.996	208	1	0
chr18	57693433	57890719	197	18qD3	1700011I03Rik	0.116	0.112	8	-0.9	0
chr7	53698537	53895177	197	7qB4	Sergef	0.134	1	215	1.3	0
chr15	10106992	10303504	197	15qA1	Prlr	0.119	0.873	172	0.3	0
chr2	18117280	18314457	197	2qA3	Dnajc1	0.571	1	200	0.6	0
chr3	5218553	5415855	197	3qA1	Zfhx4	0.039	1	263	-1	0
chr12	73312738	73510041	197	12qC3	Rtn1	0.074	0.997	210	0.8	0
chr1	127573571	127770439	197	1qE3	Gpr39	0.021	0.69	136	-0.2	0
chr5	151840202	152036411	196	5qG3	Stard13	0.227	1	198	-0.3	0
chr5	106929912	107126306	196	5qE5	Zfp644	1.885	0.819	161	0.6	0
chr5	97821458	98017144	196	5qE3	4930467D21Rik	0.101	1	216	-0.9	0
chr14	67852128	68048604	196	14qD1	Ebf2	0.014	0.926	182	-0.2	0
chr15	94100593	94295849	195	15qE3	Adamts20	0.006	0.328	64	-0.3	0
chr2	12028258	12223547	195	2qA1	Itga8	0.088	1	196	-1.2	0
chr10	111708178	111903360	195	10qD2	Kcnc2	0.018	0.338	66	-0.8	0
chr15	18748701	18943990	195	15qA2	Cdh10	0.107	1	206	-1.1	0
chr3	27837601	28032284	195	3qA3	Pld1	0.047	1	204	0.2	0
chr6	7947807	8142617	195	6qA1	Col28a1	0	0	0	-0.4	0
chr2	12998593	13193058	194	2qA1	Rsu1	0.974	1	211	-0.5	0
chr10	6179459	6373423	194	10qA1	Mthfd1l	1.088	1	211	1.5	0
chr3	32848552	33042169	194	3qA3	Pex5l	0.009	0.355	70	-0.2	0
chr4	69877889	70071477	194	4qC2	Cdk5rap2	0.946	1	200	-1	0
chr2	58998906	59193265	194	2qC1.1	Pkp4	2.507	1	239	0.9	0
chr7	82259782	82454148	194	7qD2	Sv2b	0.002	0	0	-0.9	0
chr2	76244564	76438704	194	2qC3	Osbpl6	0.023	0.989	192	0.3	0
chr4	68422547	68615431	193	4qC1	Dbc1	0.039	1	203	-1	0
chr14	75154479	75347684	193	14qD3	Lrch1	0.492	0.999	212	-0.3	0
chr9	70055156	70247874	193	9qD	Myo1e	0.639	1	199	1.5	0.468		2			2
chr17	3326572	3519397	193	17qA1	Tiam2	0.029	1	206	0.8	0
chr5	129266275	129459237	193	5qG1.3	Rimbp2	0.082	1	198	0.9	0
chr12	74685782	74879172	193	12qC3	Prkch	0.148	1	202	-0.2	0
chr13	63406016	63598586	193	13qB3	Fancc	0.32	0.803	136	1.2	0
chr3	146067776	146259576	192	3qH2	Dnase2b	0.505	0.36	69	0.2	0
chr15	7156119	7348395	192	15qA1	Egflam	0.005	0	0	1	0
chr15	90317912	90509863	192	15qE3	Cpne8	0.137	1	194	-1.3	0
chr4	33397285	33589589	192	4qA5	Rngtt	3.103	1	344	1.2	0
chr1	129383122	129574673	192	1qE3	Tmem163	0.011	0	0	0.3	0
chr13	44824842	45017012	192	13qA5	Jarid2	13.646	1	284	1.7	0
chr5	64550689	64742725	192	5qC3.1	Tbc1d1	0.42	0.933	341	1.5	0
chr19	55816299	56008144	192	19qD2	Tcf7l2	0.521	1	227	1.4	0
chr17	42452895	42644690	192	17qB3	3110082D06Rik	0.008	0.151	29	-1	0
chr5	122308395	122500111	192	5qF	Cux2	0.083	1	221	1.4	0
chr8	32928499	33119581	191	8qA3	Nrg1	0.834	1	275	-1.3	0
chr15	25552279	25743428	191	15qB1	Myo10	1.809	1	222	0.7	0
chr19	23833365	24024087	191	19qB	Apba1	0.009	0.323	63	0.5	0
chr16	91729525	91920842	191	16qC3-C4	Itsn1	0.531	0.78	144	1.5	0
chr11	68022865	68214325	191	11qB3	Ntn1	2.218	1	211	1.1	0
chr4	25536478	25727391	191	4qA3	Fut9	1.175	1	266	-0.8	0
chr7	146575007	146765551	191	7qF4	Inpp5a	0.433	1	211	1.2	0
chr8	66493566	66684790	191	8qB3.1	Tll1	0.044	1	202	-1	0
chr2	114679828	114869708	190	2qE4	Gm13974	0	0	0	-1.1	0
chr3	36762027	36951955	190	3qB	4932438A13Rik	0.905	1	193	-0.3	0
chr4	145104786	145294344	190	4qE1	Gm13242	1.112	0.884	144	1.7	0
chr13	58024532	58214953	190	13qB1	Klhl3	0.017	0.507	69	1	0
chrX	36125847	36315865	190	XqA3.3	6030498E09Rik	0.004	0.147	28	0.3	0
chr19	53751795	53941570	190	19qD2	Rbm20	0.201	1	192	1.5	0
chr3	113733457	113923636	190	3qF3	Col11a1	0.033	1	207	-0.9	0
chr4	73659337	73848118	189	4qC3	Frmd3	0.012	0.334	63	-0.1	0
chr16	22468533	22657294	189	16qB1	Dgkg	0.019	0.783	152	1.4	0
chr13	49559395	49748124	189	13qA5	Cenpp	1.377	1	268	0.4	0
chr7	145400656	145589413	189	7qF4	Tcerg1l	0.036	1	196	0	0
chr6	88207327	88396533	189	6qD1	Eefsec	0.569	1	241	1.5	0
chr2	91570290	91759006	189	2qE1	Ambra1	2.165	1	192	1.5	0
chr2	108932453	109120905	188	2qE3	Mettl15	0.155	1	226	-1	0
chr7	73007056	73195220	188	7qC	Pcsk6	0.655	1	199	0.9	0
chrX	33428826	33616557	188	XqA3.2	Dock11	0.409	1	203	-0.4	0
chr8	108761802	108949628	188	8qD3	Gm17245	0.043	0.592	87	1.9	0
chr10	106373219	106560724	188	10qD1	Acss3	0.006	0.151	32	-0.7	0
chr4	136203453	136391903	188	4qD3	Ephb2	0.161	0.987	186	1.3	0
chrX	16709174	16896494	187	XqA1.2	Efhc2	0.03	0.84	182	-0.4	0
chr1	27099345	27286771	187	1qA5	Gm11161	0	0	0	-1	0
chr18	12913822	13100350	187	18qA1	Osbpl1a	0.926	1	230	0.9	0
chr13	13682675	13869710	187	13qA1	Lyst	0.3	0.952	125	0.4	0
chr7	137720997	137908298	187	7qF3	Tacc2	0.846	1	212	1.5	0
chr19	37095780	37283091	187	19qC2	Cpeb3	0.247	1	206	1.7	0
chr1	161667640	161855053	187	1qH2.1	Tnr	0.002	0	0	-1.3	0
chr2	65683823	65869603	186	2qC1.3	Csrnp3	0.434	1	199	0.1	0
chr13	105421219	105607222	186	13qD1	Cwc27	1.092	1	241	-0.6	0
chr14	15653278	15839257	186	14qA2	Nek10	0.039	1	195	-0.5	0
chrX	19682880	19868933	186	XqA1.3	Slc9a7	0.086	1	202	0	0
chr16	94350487	94535170	185	16qC4	Hlcs	0.187	1	186	1.3	0
chr14	7238362	7423127	185	14qA1	Gm3629	0	0	0	-2	0
chr7	30105396	30290479	185	7qB1	Sipa1l3	0.566	1	238	1.4	0
chr14	5087022	5272258	185	14qA1	Gm3317	0.002	0	0	NULL	0
chr8	58419256	58604226	185	8qB2	Glra3	0	0	0	-1	0
chr7	123267007	123451890	185	7qF1	Plekha7	1.914	1	216	1.1	0
chr10	13686184	13871182	185	10qA2	Hivep2	0.203	1	203	-0.4	0
chr18	22503383	22688728	185	18qA2	Asxl3	0.098	1	190	-0.8	0
chr15	95621273	95805180	184	15qF1	Ano6	0.958	1	229	0.6	0
chr2	106062213	106246308	184	2qE3	Dcdc5	0.001	0	0	-1	0
chr4	49674482	49858616	184	4qB1	Grin3a	0.007	0.06	25	-0.9	0
chr16	16417009	16600642	184	16qA3	Fgd4	0.757	0.999	188	0.9	0
chr4	98603355	98787606	184	4qC6	Dock7	0.553	1	203	1.5	0
chr18	5591857	5775465	184	18qA1	Zeb1	0.189	0.996	184	-0.7	0
chr13	36959046	37142113	183	13qA3.3	F13a1	0.001	0	0	-0.8	0
chr5	123497381	123680880	183	5qF	Gm17627	0.191	0.415	66	1.5	0
chr18	15127193	15309955	183	18qA1	Kctd1	0.057	0.532	123	0.3	0
chr5	107535588	107718648	183	5qE5	Tgfbr3	0.032	0.999	184	-0.8	0
chr11	11179628	11362411	183	11qA1	Zpbp	0.045	0.513	70	-0.6	0
chr3	9427010	9610085	183	3qA1	Zfp704	1.518	1	214	1.4	0
chr11	23206915	23389744	183	11qA3.2	Usp34	4.402	1	190	1.2	0
chr10	67558340	67741474	183	10qB5.1-2	Arid5b	1.621	1	247	1.3	0
chr4	9196439	9378838	182	4qA1	Clvs1	0.005	0.121	22	-1.3	0
chr14	68369984	68551629	182	14qD1	Dock5	0.741	0.999	187	1	0
chr19	47812050	47993777	182	19qD1	Wdr96	0.03	0.473	66	1.3	0
chr9	48462415	48644050	182	9qA5.3	Zbtb16	0.006	0.138	33	0.7	0
chr7	63305524	63487164	182	7qB5	Herc2	0.98	1	191	0.9	0
chr8	40068898	40250466	182	8qA4	Tusc3	1.074	1	220	-1	0
chr6	127911413	128093612	182	6qF3	Tspan9	0.341	0.999	186	0.9	0
chr6	38644388	38826189	182	6qB1	Hipk2	0.303	1	189	1.1	0
chr15	80590015	80771516	182	15qE1	Tnrc6b	1.699	1	189	1	0
chr4	53453284	53635350	182	4qB2	Slc44a1	0.886	1	192	1	0
chr14	4126976	4307934	181	14qA1	Gm2974	0.006	0.102	29	NULL	0
chr15	99869094	100049904	181	15qF1	Dip2b	0.827	1	189	1.7	0
chr13	46844455	47025087	181	13qA5	Kif13a	0.871	1	249	1.5	0
chr6	36159619	36340191	181	6qB1	9330158H04Rik	0.002	0.022	4	-1.3	0
chr2	136716953	136897686	181	2qF3	2210009G21Rik	1.352	1	230	-0.7	0
chr15	38656627	38837731	181	15qB3.1	Gm17265	0.004	0.079	19	1.1	0
chr8	80737195	80918225	181	8qC1	Ttc29	0.004	0.028	201	1.1	0
chr9	63269261	63450300	181	9qC	Iqch	0.005	0	0	0.6	0
chr14	7915721	8097167	181	14qA1	Gm3696	0.001	0	0	-1.6	0
chr16	64924554	65105610	181	16qC1.3	Htr1f	0.002	0	0	0.6	0
chr19	19005094	19185686	181	19qB	Rorb	0.003	0	0	-1	0
chr14	69981560	70162426	181	14qD2	Gm16867	0.155	0.248	78	1.2	0
chr1	179921565	180102835	181	1qH4	Gm16432	0.005	0.022	13	0.8	0
chr2	126146708	126326410	180	2qF1	Atp8b4	0.006	0	0	0	0
chr18	36177332	36357034	180	18qB2	Nrg2	0.07	1	187	1.4	0
chr1	141093632	141273677	180	1qF	Crb1	0.006	0.068	13	-0.2	0
chr4	44544016	44724318	180	4qB1	Pax5	0.01	0.108	30	0.8	0
chr19	45892633	46072978	180	19qC3	9130011E15Rik	0.88	1	182	1.6	0
chr1	121554620	121734190	180	1qE2.3	Ptpn4	1.793	1	189	1.2	0
chr15	66502314	66682283	180	15qD2	Tg	0.002	0	0	-0.5	0
chr17	52865083	53044561	179	17qC	Kcnh8:1	0.233	1	349	-1.3	0.105		1			1
chr6	17156822	17335604	179	6qA2	Gm15581	0.002	0	0	-0.8	0
chr4	57730528	57909854	179	4qB3	Akap2	0.731	1	396	1.4	0
chr19	24757505	24936345	179	19qB	Pgm5	0.002	0	0	-0.3	0
chr2	58241054	58419568	179	2qC1.1	Acvr1	0.277	0.868	155	0	0
chr17	50648871	50827818	179	17qC	Plcl2	0.072	1	182	-1.2	0
chr18	57533108	57712051	179	18qD3	4930511M06Rik	0.157	0.065	12	-1	0
chr5	3343892	3523218	179	5qA1	Cdk6	1.323	1	251	0.9	0
chr1	56850829	57029346	179	1qC1.3	Satb2	0.167	1	190	-0.9	0
chr5	10866071	11044948	179	5qA1	Gm8871	0	0	0	-1.7	0
chr9	113650590	113828815	178	9qF3	Clasp2	1.52	1	241	1	0
chr15	80842710	81021187	178	15qE1	Mkl1	0.898	1	198	1.3	0
chr7	114514241	114692170	178	7qE3	Syt9	0.726	1	197	1.4	0
chr2	29202338	29380313	178	2qB	Med27	0.504	1	202	1.3	0
chr17	6314198	6492328	178	17qA1	Gm17692	0.069	0.281	50	NULL	0
chr6	137425765	137603397	178	6qG1	Eps8	0.613	1	220	0.5	0
chr3	80840337	81017962	178	3qE3	Pdgfc	0.907	1	209	0.5	0
chr5	118231040	118408849	178	5qF	Nos1	0.028	0.525	111	1.3	0
chr9	59598702	59776673	178	9qB	Myo9a	1.057	1	189	1.2	0
chr6	22825501	23002916	177	6qA3.1	Ptprz1	0.036	1	184	-0.7	0
chr13	41405284	41582689	177	13qA3-A4	Nedd9	0.018	0.283	53	-0.1	0
chr6	34548499	34725473	177	6qB1	Cald1	0.673	1	183	0.9	0
chr4	8617552	8794806	177	4qA1	Chd7	0.782	1	237	-0.1	0
chr1	134461267	134638374	177	1qE4	Nfasc	0.256	1	182	1.3	0
chr13	53204680	53381493	177	13qB1	Ror2	0.332	1	177	1.2	0
chr9	121206619	121384034	177	9qF4	Trak1	0.889	1	209	1	0
chr11	43772590	43948489	176	11qB1.1	Gm12153	0.003	0.051	9	-0.7	0
chr6	5991218	6167173	176	6qA1	Slc25a13	1.519	1	192	0.5	0
chr11	54336348	54512787	176	11qB1.3	Rapgef6	1.957	1	206	0.9	0
chr17	78599587	78775932	176	17qE2-E3	Crim1	0.165	1	183	-1	0
chr8	24085315	24260969	176	8qA2	Ank1	0.011	0.081	129	1.3	0
chr1	108434754	108610851	176	1qE2.1	Bcl2	0.059	1	182	-0.9	0
chr7	108257288	108432919	176	7qE3	Fchsd2	0.787	1	183	1.1	0
chr16	52031661	52208160	176	16qB5	Cblb	0.483	1	179	-1.3	0
chr4	44768748	44945087	176	4qB1	Zcchc7	2.154	1	188	1.2	0
chr6	115968635	116143504	175	6qE3	Tmcc1	0.636	1	195	1.1	0
chr12	101787987	101963238	175	12qE	Rps6ka5	0.911	1	204	1.4	0
chr17	74927634	75103113	175	17qE2	Birc6	3.338	1	190	1.5	0
chr19	16510156	16685308	175	19qA-B	Gna14	0.21	0.998	193	0.7	0
chr15	67915327	68090418	175	15qD2	Zfat	0.415	1	179	-0.9	0
chr2	149654946	149830128	175	2qG3	Tmem90b	0.119	0.997	176	-0.2	0
chr2	106533425	106708513	175	2qE3	Mpped2	0.494	1	215	-0.4	0
chr18	32823295	32996941	174	18qB1	4930455D15Rik	0.002	0	0	-1	0
chr12	82459846	82633892	174	12qD1	Cox16	1.207	1	198	0.7	0
chr13	37870268	38043871	174	13qA3.3	Rreb1	0.869	0.999	175	1.4	0
chr3	148478549	148652280	174	3qH3	Lphn2	1.421	1	181	-0.7	0
chr1	57831005	58005241	174	1qC1.3	Spats2l	0.119	0.997	179	0.1	0
chr12	58665099	58838915	174	12qC1	Ttc6	0.013	0.362	63	-0.6	0
chr4	62626606	62800742	174	4qB3	Zfp618	0.097	1	176	-0.5	0
chr13	96729397	96902532	173	13qD1	Sv2c	0.083	1	201	-0.1	0
chr5	103854210	104027378	173	5qE5	Ptpn13	0.28	1	184	1.2	0
chr3	96708615	96881339	173	3qF2.1	Gja5	0.003	0.138	27	1.2	0
chr6	11857808	12031197	173	6qA1	Phf14	0.936	1	194	-0.4	0
chr19	26679649	26852811	173	19qC1	Smarca2	0.012	0.559	98	-0.9	0
chr5	23009173	23182266	173	5qA3	Srpk2	0.967	1	208	1.3	0
chr10	86520790	86693344	173	10qC1	1700113H08Rik	0	0	0	-1.4	0
chr9	73958137	74131115	173	9qD	Wdr72	0.005	0	0	-0.2	0
chr18	21285701	21458639	173	18qA2	Fam59a	0.429	1	199	1.1	0
chr2	35413785	35586514	173	2qB	Dab2ip	0.445	1	181	1.1	0
chr10	102525831	102698956	173	10qD1	Lrriq1	0.01	0.193	45	-0.7	0
chr6	13821525	13994373	173	6qA1	1110019D14Rik	0.394	1	205	-0.2	0
chrX	95345059	95518554	173	XqC3	Ar	0.022	1	187	-0.8	0
chr6	140372619	140544804	172	6qG2	Plekha5	0.665	1	199	1.2	0
chr8	48265401	48437702	172	8qB1.1	Stox2	0.517	1	278	0.5	0
chr14	22319075	22491354	172	14qA3	Myst4	6.836	1	180	1.4	0
chr7	127066230	127238691	172	7qF2	Dnahc3	0.003	0.041	7	0.3	0
chr8	63702668	63874869	172	8qB3.1	Sh3rf1	0.437	1	219	0.2	0
chr1	71289663	71461484	172	1qC3	Abca12	0.006	0	0	-0.3	0
chr14	72937752	73109810	172	14qD2	Fndc3a	1.903	1	182	-0.5	0
chr10	42722306	42894336	172	10qB2	Sobp	0.019	0.662	115	1.1	0
chr4	14550766	14723207	172	4qA1	Lrrc69	0.01	0.062	42	-0.5	0
chr15	9507947	9678623	171	15qA1	Spef2	0.008	0.299	44	-0.5	0
chr19	20857947	21028692	171	19qB	Tmc1	0.007	0.035	6	0.3	0
chr1	188868526	189039344	171	1qH5	Spata17	0.018	0.11	17	-0.4	0
chr9	111967594	112138442	171	9qF3	Arpp21	0.016	0.328	44	-1.2	0
chrX	52804732	52975453	171	XqA5	Gm16404	0	0	0	-0.9	0
chr13	117643630	117814323	171	13qD2.3	Parp8	0.088	1	180	-0.8	0
chr13	94541633	94712971	171	13qC3-D1	Arsb	0.024	1	181	-0.8	0
chr6	92722692	92893486	171	6qD1	Adamts9	0.18	1	173	-0.4	0
chr7	65913571	66084796	171	7qC	Atp10a	0.176	1	180	-1.2	0
chr1	64832556	65003398	171	1qC2	Plekhm3	0.258	0.989	170	1.4	0
chr3	17971949	18143338	171	3qA1	Cyp7b1	0.141	1	205	0.3	0.096				1	1
chr9	120213053	120383959	171	9qF4	Myrip	0.006	0	0	0.9	0
chr10	53624593	53795602	171	10qB3	Man1a	0.181	0.999	186	-1.1	0
chr5	39097700	39268051	170	5qB3	Clnk	0.018	0.404	91	1.5	0
chrX	50423171	50593288	170	XqA5	Plac1	0.007	0.387	96	0.5	0
chr10	41258651	41429106	170	10qB2	Ccdc162	0.046	0.407	149	1.6	0
chr1	39250575	39420079	170	1qB	Npas2	0.014	0.422	76	0.9	0
chr2	91115224	91284861	170	2qE1	1110051M20Rik	0.288	1	172	1.7	0
chr6	28611830	28781747	170	6qA3.3	Lrrc4	0.003	0	0	0.5	0
chr18	9707645	9877993	170	18qA1	Colec12	0.145	1	179	0	0
chr4	63640887	63810958	170	4qC1	8030451A03Rik	0.002	0.1	10	-1.3	0
chr11	16157726	16327313	170	11qA2	Vstm2a	0.009	0.224	26	-0.2	0
chr2	66108837	66278897	170	2qC1.3	Scn1a	0.007	0	0	-0.7	0
chr17	25931838	26101729	170	17qA3.3	Gm17480	0.06	0.286	26	1.2	0
chr19	45438223	45607831	170	19qC3	Btrc	0.62	0.998	171	1.5	0
chr4	99432092	99602418	170	4qC6	Itgb3bp	0.223	0.378	80	1	0
chr10	58909731	59079440	170	10qB4	Ccdc109a	0.469	1	171	1.2	0
chr2	125809218	125977740	169	2qF1	4930525F21Rik	0.001	0.019	4	-0.5	0
chr7	7982000	8150983	169	7qA1	Gm3962	0	0	0	NULL	0
chrX	6356431	6525489	169	XqA1.1	Dgkk	0.016	1	171	-0.9	0
chr2	101554441	101723184	169	2qE2	Prr5l	0.071	0.504	85	0.2	0
chr12	109609166	109777827	169	12qF1	Eml1	0.023	0.696	132	0.9	0
chr11	29999394	30168175	169	11qA3.3	Spnb2	1.678	1	192	0.4	0
chr2	144425632	144594494	169	2qG1	Dtd1	0.635	1	193	1	0
chr7	109416337	109585362	169	7qE3	Stim1	0.409	1	174	1.5	0
chr9	63247187	63416498	169	9qC	Gm16759	0.007	0.226	65	0.6	0
chr11	5176326	5344850	169	11qA1	Znrf3	2.115	1	183	1.5	0
chr14	6826494	6994927	168	14qA1	Gm10409	0	0	0	NULL	0
chr18	37833988	38001527	168	18qB3	Pcdhga11	0.628	1	213	1.5	0
chr9	115817681	115985294	168	9qF3	Gadl1	0.002	0	0	-0.9	0
chr8	109206967	109375339	168	8qD3	Tmco7	1.393	1	187	1.7	0
chr8	116729511	116897971	168	8qE1	Vat1l	0.026	0.332	57	-1.2	0
chrX	24330065	24498517	168	XqA2	Gm5935	0	0	0	-1.4	0
chr14	101841576	102008408	167	14qE2.3	Tbc1d4	0.103	1	180	0.4	0
chr10	3294062	3460745	167	10qA1	Ipcef1	0.006	0.057	11	-1.1	0
chr10	86303942	86470770	167	10qC1	Stab2	0.008	0.264	44	-0.2	0
chr10	30356341	30522913	167	10qA4	Ncoa7	0.624	1	185	0.9	0
chr7	132851389	133018311	167	7qF3	D430042O09Rik	0.14	1	175	0.3	0
chr10	74813855	74980717	167	10qC1	1110038D17Rik	0.027	0.138	23	1.2	0
chrX	31264160	31430575	166	XqA3.1	Gm2854	0	0	0	NULL	0
chr1	51806608	51972915	166	1qC1.1	Myo1b	0.364	1	193	0.8	0
chr14	28051224	28217090	166	14qA3	Arhgef3	0.538	1	169	1.4	0
chr13	34271026	34437051	166	13qA3.3	Slc22a23	0.136	1	217	1.3	0
chr11	16652205	16818161	166	11qA2	Egfr	0.173	1	168	-1	0
chr13	108514697	108680258	166	13qD2.1	Zswim6	1.364	1	174	0.6	0
chr10	25632136	25798456	166	10qA4	Tmem200a	0.069	0.757	126	-0.9	0
chr10	42032390	42198371	166	10qB2	Lace1	0.669	1	203	1.4	0
chr12	100955740	101121652	166	12qE	2610021K21Rik	0.122	1	181	1.1	0
chr13	81102148	81267863	166	13qC3	9330111N05Rik	0.002	0	0	-0.6	0
chr2	137489170	137654980	166	2qF3	Gm14064	0	0	0	-1.2	0.164			1		1
chrX	6730935	6896484	166	XqA1.1	Clcn5	0.471	1	182	0.6	0
chr13	64838898	65005196	166	13qB3	Cntnap3	0.007	0	0	-0.4	0
chr3	65470149	65635084	165	3qE1	Lekr1	0.039	0.22	60	1.1	0
chr3	152480044	152645210	165	3qH3	St6galnac5	0.003	0	0	-0.7	0
chr3	123229083	123393770	165	3qG1	Ndst3	0.006	0	0	-0.7	0
chr11	121313262	121478478	165	11qE2	Tbcd	0.874	1	200	1	0
chr2	27117623	27282553	165	2qA3	Vav2	0.32	1	172	1.2	0
chr15	68758849	68923942	165	15qD3	Khdrbs3	0.535	1	184	-1.1	0
chr2	73448716	73613403	165	2qC3	Chn1	0.437	1	181	1.2	0
chr8	81552335	81717665	165	8qC1-C2	Zfp827	0.958	1	187	0.5	0
chr17	49071703	49236913	165	17qC	Lrfn2	0.023	0.767	66	1	0
chr9	114976396	115141341	165	9qF3	Osbpl10	0.401	1	273	0.8	0
chr8	48911436	49075897	164	8qB1.1	Wwc2	0.931	1	176	1.3	0
chr1	89951962	90115579	164	1qD	Ugt1a10	0.013	0.648	106	-0.2	0
chr3	84619189	84783120	164	3qF1	Fbxw7	1.81	1	214	0.8	0
chr19	16691252	16855417	164	19qB	Vps13a	0.785	1	177	0.5	0
chr10	8442016	8605868	164	10qA1	Sash1	1.891	1	171	0	0
chr5	116295286	116458956	164	5qF	Cit	0.805	1	165	1.3	0
chr13	83643032	83806684	164	13qC3	Mef2c	0.013	0.208	34	-0.7	0
chr7	91394790	91558469	164	7qD3	Arnt2	0.2	1	165	-0.5	0
chr5	62993683	63157437	164	5qC3.1	Arap2	2.056	1	179	-0.9	0
chr18	57292743	57457121	164	18qD3	Megf10	0.004	0	0	-0.6	0
chr5	116574649	116738994	164	5qF	Ccdc60	0.033	1	167	1.4	0
chr4	58055313	58219731	164	4qB3	Svep1	0.001	0	0	0.6	0
chr18	56921369	57085202	164	18qD3	2014-03-03	0.099	0.926	152	1.3	0
chr3	67696141	67860515	164	3qE1	Iqcj	0.001	0	0	-1.4	0
chr16	96583274	96747187	164	16qC4	Igsf5	0.002	0	0	0	0
chr10	25079603	25243320	164	10qA4	Epb4.1l2	1.907	1	175	1.1	0
chr7	119571018	119735206	164	7qF1	Parva	0.138	1	166	1.1	0
chr5	148373179	148537587	164	5qG3	Flt1	0.081	0.999	165	0.8	0
chr1	154802230	154966390	164	1qG3	Nmnat2	0.225	1	166	1.9	0
chr4	80924403	81088719	164	4qC3	Mpdz	0.112	1	167	-0.8	0
chr1	89951967	90115159	163	1qD	RP23-324B17.1	0.003	0.08	13	-0.2	0
chr4	73888400	74051764	163	4qC3	Kdm4c	4.422	0.981	200	0.2	0
chr6	50243325	50406200	163	6qB2.3	Osbpl3	0.149	1	166	0	0
chr7	151774453	151937879	163	7qF5	Ano1	0.016	0.386	69	1.3	0
chr11	117060974	117223639	163	11qE2	2014-09-09	0.316	1	188	0.9	0
chr9	79662857	79825611	163	9qE1	Filip1	0.005	0.135	22	-0.5	0
chr5	104121392	104284341	163	5qE5	Aff1	1.149	1	183	1.5	0
chr1	172634587	172797902	163	1qH3	Atf6	0.999	1	175	1.4	0
chr16	75859037	76022515	163	16qC3.1	Samsn1	0	0	0	-1.2	0
chr6	72576371	72739248	163	6qC1	Tcf7l1	2.066	1	189	1.6	0
chr7	3687071	3849722	163	7qA1	Gm14548	0	0	0	1.1	0
chr11	90337805	90499398	162	11qD	Stxbp4	0.427	1	164	-1.1	0
chr5	20989664	21151423	162	5qA3	Fbxl13	0.004	0.216	128	1.1	0
chr2	55288380	55450556	162	2qC1.1	Kcnj3	0.596	0.999	215	-0.4	0
chr5	34349846	34512097	162	5qB2	Poln	0.381	0.996	162	1.2	0
chr2	160772713	160934811	162	2qH2	Chd6	2.096	1	183	0.9	0
chr10	63391219	63553025	162	10qB4	Lrrtm3	0.003	0	0	-1.4	0
chr3	138405158	138567397	162	3qH1	Tspan5	1.172	1	206	1	0
chr3	53959978	54122389	162	3qC	Trpc4	0.002	0	0	-1.1	0
chrX	139115948	139278037	162	XqF2	Tmem164	0.258	1	180	-0.2	0
chr2	69262396	69424122	162	2qC2	Lrp2	0.61	1	179	1.2	0
chr18	70138784	70301259	162	18qE2	Rab27b	0.002	0	0	-0.6	0
chr9	58722485	58884248	162	9qB	Neo1	1.045	1	172	1	0
chr5	125497522	125659589	162	5qF-G1	Ncor2	0.641	0.999	175	1.5	0
chr10	59165224	59326880	162	10qB4	Cbara1	0.351	1	170	1.5	0
chr7	73371797	73533236	161	7qC	Lrrk1	0.046	0.88	142	0.4	0
chr12	87702066	87862578	161	12qD2	Esrrb	2.455	0.617	161	1.5	0
chr1	4899656	5060366	161	1qA1	Rgs20	0.137	1	176	1.3	0
chr6	54219674	54380215	161	6qB3	9130019P16Rik	0.003	0.081	13	0.2	0
chr5	64040341	64201785	161	5qC3.1	3110047P20Rik	0.003	0.033	100	-0.2	0
chr2	76847959	77008693	161	2qC3	Ccdc141	0.115	1	161	0.9	0
chr13	60703307	60864546	161	13qB2	Dapk1	0.539	1	182	0.2	0
chr17	68192052	68353460	161	17qE1.2	Arhgap28	0.338	1	166	-0.2	0
chr14	4963444	5124507	161	14qA1	Gm3298	0	0	6	NULL	0
chr11	64815540	64976463	161	11qB3	Arhgap44	0.386	1	166	-0.8	0
chr2	49643207	49804369	161	2qC1.1	Lypd6b	0.09	1	172	0.1	0
chr12	72932064	73093354	161	12qC3	Daam1	0.557	1	179	0.4	0
chr16	13256573	13417622	161	16qA1	Mkl2	0.957	1	219	1.4	0
chrY	635399	796225	161	YqA1	Usp9y	0.012	0.166	28	-0.4	0
chr17	86384004	86544515	161	17qE4	Srbd1	2.677	1	309	0.8	0
chr9	41772802	41932380	160	9qA5.1	Sorl1	0.704	1	162	0.8	0
chr1	70772288	70931971	160	1qC3	Vwc2l	0	0	0	-1.1	0
chr5	46088419	46248854	160	5qB3	Lcorl	0.793	1	190	-0.6	0
chrX	149044051	149204008	160	XqF3	Shroom2	1.131	1	172	0.4	0
chr18	77520696	77681080	160	18qE3	Loxhd1	0.003	0	0	1.3	0
chr10	66558872	66719074	160	10qB5.1	Jmjd1c	6.952	1	387	1.3	0
chr11	3603733	3763906	160	11qA1	Osbp2	0.013	0.471	107	1.5	0
chr2	140055590	140215442	160	2qF3	Sel1l2	0.002	0	0	0.1	0
chr5	36927436	37087263	160	5qB3	D5Ertd579e	0.278	1	260	1.4	0
chr3	122779436	122939067	160	3qG1	Synpo2	0.107	1	185	0.7	0
chr12	82127794	82287401	160	12qD1	Smoc1	0.632	1	181	1.4	0
chr13	30905787	31065916	160	13qA3.2	Exoc2	0.864	1	178	-0.6	0
chr6	53237288	53397716	160	6qB3	9430076C15Rik	0.043	0.992	285	-0.6	0
chr7	16065173	16225251	160	7qA2	Obox3	0.003	0.019	3	-1.5	0
chr7	116422736	116582595	160	7qE3	Stk33	0.003	0	0	0.2	0
chr1	169619369	169778872	160	1qH2.3	Lmx1a	0.007	0	0	-0.7	0
chr8	125407220	125565897	159	8qE1	Ankrd11	6.308	1	192	1.9	0
chrX	149672008	149830675	159	XqF3	Klf8	0.397	1	216	0.8	0
chr18	89141181	89300405	159	18qE4	Rttn	0.816	1	183	-0.9	0
chr8	96333865	96493288	159	8qC5	Gnao1	0.059	1	171	1	0
chr2	24459406	24618672	159	2qA3	Cacna1b	0.201	1	164	0.5	0
chr8	119098300	119256891	159	8qE1	Cdyl2	1.804	1	167	1	0
chr3	37318817	37478018	159	3qB	Spata5	3.856	1	175	0.2	0
chr9	86200840	86358557	158	9qE3.1	Ube2cbp	0.351	1	164	-0.7	0
chr11	112905208	113063152	158	11qE2	2610035D17Rik	0.073	1	176	-0.4	0
chr6	82352327	82510097	158	6qC3	Tacr1	0.005	0.089	11	0.8	0
chr8	80134758	80292869	158	8qC1	4933431K23Rik	0.002	0	0	0.4	0
chrX	155648238	155806176	158	XqF4	Rps6ka3	0.404	0.713	117	0.8	0
chr1	60237442	60395172	158	1qC2	Nbeal1	1.08	1	163	1.3	0
chr2	33585472	33743466	158	2qB	Fam125b	0.17	0.994	158	0.7	0
chr5	112848179	113006205	158	5qF	Sez6l	0.002	0	0	0.7	0
chr1	111878903	112036734	158	1qE2.1	Cdh7	0.002	0	0	-1.2	0
chr9	66198256	66356582	158	9qC	Herc1	1.906	1	197	0.6	0
chr7	67127387	67285105	158	7qC	Snrpn	1.159	1	252	-0.7	0
chr6	28189930	28348005	158	6qA3.2-3	Zfp800	0.085	0.209	60	0	0
chr3	60277031	60433670	157	3qD	Mbnl1	0.86	0.825	142	-1	0
chr16	38089086	38246170	157	16qB3	Gsk3b	1.875	1	162	1	0
chr5	66407787	66564356	157	5qC3.1	Rbm47	1.644	0.867	148	1.7	0
chr8	19863336	20020413	157	8qA1.3	2610005L07Rik	0.706	0.529	53	-1.2	0
chr2	72123693	72280667	157	2qC3	B230120H23Rik	1.142	1	191	1	0
chr4	115979366	116136788	157	4qD1	Mast2	1.615	1	168	1.5	0
chr6	130128770	130285823	157	6qF3	Klra9	0	0	0	-1	0
chr6	65728981	65886367	157	6qC1	Prdm5	2.38	1	169	0.5	0
chr2	17976897	18134017	157	2qA3	Mllt10	2.669	1	180	1.2	0
chr6	147424392	147581134	157	6qG3	Ccdc91	0.261	1	159	-1.3	0
chr12	77866575	78022399	156	12qC3	Fntb	0.523	0.833	117	1.4	0
chr2	109857973	110013517	156	2qE3	Ccdc34	0.181	0.807	126	-0.2	0
chr18	43691061	43847427	156	18qB3	Jakmip2	0.085	1	162	-1.2	0
chr14	34027211	34183122	156	14qB	Arhgap22	0.07	0.998	159	-0.2	0
chr1	63004991	63161241	156	1qC2	Ino80d	1.157	0.504	79	1.6	0
chr11	84797943	84953663	156	11qC	Usp32	1.106	0.999	164	1.4	0
chr11	48792390	48948889	156	11qB1.2	Olfr56	0.001	0	0	0.8	0
chr2	18763881	18919753	156	2qA3	Pip4k2a	0.128	1	163	-0.8	0
chr17	29686743	29842924	156	17qA3.3	Ftsjd2	0.748	1	173	1.3	0
chr14	120674890	120830919	156	14qE4	Mbnl2	1.115	1	179	0.1	0
chr5	17080098	17236086	156	5qA3	Sema3c	0.075	1	164	-1.2	0
chr10	18307816	18463564	156	10qA3	D10Bwg1379e	0.087	1	166	1.1	0
chr9	67688202	67843441	155	9qC	Vps13c	0.725	1	172	-0.2	0
chr13	25147872	25302575	155	13qA3.1	Dcdc2a	0.008	0.156	32	-0.1	0
chr1	69577787	69732534	155	1qC3	Ikzf2	0.118	1	206	-1.4	0
chr3	141903567	142058630	155	3qH1	Pdlim5	1.418	1	168	-0.9	0
chr14	99498651	99653712	155	14qE2.2	Pibf1	0.623	1	174	1.4	0
chr2	49474817	49630298	155	2qC1.1	Kif5c	0.372	1	169	0.7	0
chr8	67218659	67373716	155	8qB3.1	Klhl2	0.645	0.999	161	1.3	0
chr5	117570137	117725228	155	5qF	Taok3	0.271	1	200	1.6	0
chr2	105064476	105219953	155	2qE3	0610012H03Rik	0.012	0.585	96	0.3	0
chr11	11014225	11168934	155	11qA1	Vwc2	0.019	0.771	199	-0.6	0
chr14	78969415	79124896	155	14qD3	Dgkh	1.05	1	196	1	0
chr13	38436994	38592183	155	13qA3.3	Bmp6	0.029	1	158	0.1	0
chr2	66318136	66473009	155	2qC1.3	Scn9a	0.013	0.714	111	-1	0
chr2	157563136	157717350	154	2qH1	Ctnnbl1	0.901	1	157	1.5	0
chr6	149357505	149511851	154	6qG3	Bicd1	0.398	1	161	1.1	0
chr4	28740280	28894649	154	4qA4	Epha7	0.162	0.999	158	-1.2	0
chr9	70645935	70800033	154	9qD	Lipc	0.003	0	0	0.8	0
chr14	65271438	65425133	154	14qD1	Kif13b	1.071	1	165	1.5	0
chr5	38740511	38894382	154	5qB3	Slc2a9	0.003	0	0	1.4	0
chr4	82543824	82698243	154	4qC3	Frem1	0.01	0.471	87	0.4	0
chr1	83250713	83404775	154	1qC5	Sphkap	0.007	0	0	-1.5	0
chr17	64950075	65104450	154	17qE1.1	Man2a1	0.422	0.997	165	-0.8	0
chr7	91081366	91235012	154	7qD3	9930013L23Rik	0.091	1	156	0.3	0
chr10	94253616	94407212	154	10qC2	Plxnc1	0.035	1	176	0.3	0
chr7	114738564	114892096	154	7qE3	Ppfibp2	0.317	1	155	1.2	0
chr3	132347107	132501470	154	3qG3	Tbck	0.35	1	171	-0.4	0
chr3	64494581	64648687	154	3qE1	Vmn2r7	0	0	0	-1.2	0
chr15	8241224	8394463	153	15qA1	Nipbl	2.546	1	163	0.9	0
chr9	74918821	75071495	153	9qD	Myo5a	1.527	1	161	1.3	0
chr17	28046284	28199545	153	17qA3.3	Anks1	0.31	1	157	1.3	0
chr7	94394605	94547220	153	7qD3	Nox4	0.281	1	154	-1	0
chr10	106708898	106862199	153	10qD1	Lin7a	0.002	0	0	-1.1	0
chr5	116889280	117041826	153	5qF	Srrm4	0.039	1	170	1.3	0
chr2	27741944	27895034	153	2qA3	Col5a1	0.069	1	169	0.3	0
chr6	51809164	51962548	153	6qB3	Skap2	0.675	1	172	1.5	0
chr8	105156894	105309011	152	8qD2	Cdh11	0.048	0.789	120	-1.2	1	1				1
chr8	48379625	48531716	152	8qB1.1	4930448N21Rik	0.409	0.788	278	0.8	0
chr13	24674057	24825685	152	13qA3.1	Fam65b	0.006	0	0	1.1	0
chr9	31923720	32076031	152	9qA4	Arhgap32	1.897	1	334	1.2	0
chr4	131479327	131631236	152	4qD2.3	Epb4.1	0.446	1	155	1.6	0
chr2	103406466	103558580	152	2qE2	Abtb2	0.161	1	157	1	0
chr8	116221025	116372641	152	8qE1	Adamts18	0.005	0	0	-1.4	0
chr6	18120686	18272768	152	6qA2	Cftr	0.026	0.985	151	-1.1	0
chr9	109833961	109986451	152	9qF2	Mtap4	2.313	1	161	1.4	0
chr4	140070399	140221927	152	4qD3	Arhgef10l	0.18	1	190	1.4	0
chr3	3508029	3659775	152	3qA1	Hnf4g	0.001	0	0	-0.7	0
chr4	48292631	48444826	152	4qB1	Invs	0.133	1	161	1.5	0
chrX	74756351	74908322	152	XqA7.3	Tbl1x	1.929	1	170	0.5	0
chr5	3928053	4080209	152	5qA1	Akap9	0.583	1	178	0.8	0
chr16	35154962	35305823	151	16qB3	Adcy5	0.019	0.678	71	1	0
chr11	87218566	87369325	151	11qC	Tex14	0.864	1	163	1.5	0
chr9	40819180	40969780	151	9qA5.1	Ubash3b	0.025	0.991	151	0.5	0
chr8	34344855	34495999	151	8qA3-A4	Wrn	0.429	1	154	0.9	0
chr1	153418315	153569069	151	1qG2	Fam129a	0.375	1	179	1.7	0
chr1	137331156	137481932	151	1qE4	Nav1:1	0.347	1	258	1.9	0
chr2	90269910	90420804	151	2qE1	Ptprj	0.335	0.998	154	0.5	0
chr3	115975470	116126950	151	3qG1	Cdc14a	0.253	1	160	0.4	0
chr2	156439440	156590099	151	2qH1	Dlgap4	0.409	1	163	1.7	0
chr4	57004843	57156309	151	4qB3	Epb4.1l4b	0.122	0.995	152	1.5	0
chr1	63492464	63643089	151	1qC2	Adam23	4.951	1	152	1.7	0
chr5	35104388	35255183	151	5qB2	Htt	0.974	1	155	1.1	0
chr2	64926395	65077460	151	2qC1.3	Cobll1	0.112	1	171	0.2	0
chr6	90609591	90760117	151	6qD1	Iqsec1	0.285	1	168	0.8	0
chr16	42725814	42875875	150	16qB4	Gm10809	0.007	0.249	20	0.7	0
chr10	51765526	51915180	150	10qB3	Ros1	0	0	0	0.4	0
chr6	120881724	121031627	150	6qF1	Mical3	0.357	1	252	1.5	0
chr15	42852356	43002364	150	15qB3.1-2	Rspo2	0.003	0	0	-1.1	0
chr2	104707961	104858061	150	2qE2	Ccdc73	0.073	1	160	1.2	0
chr19	14522561	14672473	150	19qA	Tle4	9.78	1	174	1.5	0
chr12	92876981	93026827	150	12qD3	Ston2	0.669	0.938	189	1.2	0
chr10	84218806	84369283	150	10qC1	Rfx4	0.092	1	162	1.6	0
chr9	52906558	53056217	150	9qA5.3	Ddx10	1.94	1	269	0.9	0
chr4	148178537	148328998	150	4qE2	Casz1	0.138	0.994	151	1.3	0
chr13	24419288	24569154	150	13qA3.1	Cmah	0.238	0.073	11	0	0
chr8	50456239	50606449	150	8qB1.2	4930555F03Rik	0.028	0.253	38	-1.4	0
chrX	108501800	108651568	150	XqE1	Rps6ka6	0.79	1	161	-0.3	0
chr4	13670582	13820796	150	4qA1	Runx1t1	0.227	1	154	-0.7	0
chrX	93501516	93651633	150	XqC3	Hsf3	0.005	0.386	59	-0.7	0
chr13	18809160	18958678	150	13qA2	Vps41	1.494	1	175	-0.6	0
chrX	162676842	162826920	150	XqF5	Gpm6b	0.022	1	170	0.7	0
chr10	107199368	107349190	150	10qD1	Otogl	0	0	0	-0.6	0
chr12	74224703	74374975	150	12qC3	Mnat1	1.996	1	201	1.4	0
chr6	18316477	18465338	149	6qA2	Cttnbp2	0.05	0.994	154	-0.7	0
chr10	94637379	94786767	149	10qC2	Cradd	1.117	1	155	1.6	0
chr16	29396123	29544950	149	16qB2	Atp13a4	0.011	0.258	42	1.1	1				1	1
chr4	90917453	91066675	149	4qC5	Elavl2	1.846	1	205	-0.8	0
chr5	94135312	94284656	149	5qE3	Gm7792	0	0	0	-2	0
chr6	30697553	30846794	149	6qA3.3	Copg2	0.378	1	164	0.6	0
chr1	129850760	129999624	149	1qE4	Zranb3	0.717	1	186	0.9	0
chr19	42357526	42506273	149	19qC3	Crtac1	0.137	1	173	1.4	0
chrY	433303	582202	149	YqA1	Uty	2.455	1	187	-0.2	0
chr5	29556353	29704930	149	5qB1	Lmbr1	0.886	1	384	0.9	0
chr15	95965249	96114039	149	15qF1	2610037D02Rik	0.454	1	208	1.5	0
chr5	42459198	42608037	149	5qB3	Gm16223	0.006	0.319	38	-1.4	0
chr3	138588869	138738163	149	3qH1	Rap1gds1	0.9	1	156	0.4	0
chr17	80979851	81127433	148	17qE3	Map4k3	2.316	1	246	1.6	0
chr4	109876326	110024514	148	4qC7	Elavl4	0.074	1	180	-0.1	0
chr1	89967374	90115572	148	1qD	Ugt1a9	0.015	0.715	106	-0.2	0
chr11	22734743	22882382	148	11qA3.2	Commd1	1.214	1	249	1.6	0
chr18	52927362	53075585	148	18qD1	Sncaip	0.001	0	0	-1	0
chr13	89879064	90026771	148	13qC3	Gm4117	0.007	0.382	58	-0.5	0
chr3	89324085	89471683	148	3qF1	Kcnn3	0.004	0.193	89	1.5	0
chr2	170557306	170705269	148	2qH3	Dok5	0.016	0.366	68	-0.3	0
chr6	115084919	115232644	148	6qE3	Syn2	0.007	0	0	0.2	0
chr5	121670227	121818586	148	5qF	Gm15800	0.549	1	150	1.6	0
chr13	46597216	46745011	148	13qA5	Cap2	0.045	1	168	0.9	0
chr16	26581789	26730203	148	16qB2	Il1rap	0.068	0.948	141	-1.1	0
chr11	30854394	31002704	148	11qA4	Asb3	0.42	0.973	127	0.9	0
chrX	92244275	92392160	148	XqC3	Arhgef9	0.13	1	170	-0.4	0
chr5	57961320	58109158	148	5qC1	4932441J04Rik	0	0	0	-1.1	0
chr2	147009818	147157417	148	2qG2	Nkx2-2as	0.007	0.264	30	0.5	0
chr4	55144079	55292351	148	4qB3	Gm12514	0.01	0.155	23	1.5	0
chr1	191552146	191700574	148	1qH6	Ptpn14	1.309	1	156	0.8	0
chr7	142729506	142877977	148	7qF3	Ptpre	0.033	1	151	-0.2	0
chr6	8580526	8728488	148	6qA1	Ica1	0.148	1	149	-1.1	0
chr1	77363759	77511663	148	1qC4	Epha4	2.001	1	155	0.1	0
chr9	101007321	101154162	147	9qE4	Ppp2r3a	0.208	0.995	155	1.1	0
chr1	36849035	36996372	147	1qB	Tmem131	3.368	1	162	2	0
chr8	12873805	13020905	147	8qA1.1	Mcf2l	0.312	1	160	1.5	0
chr15	54943871	55090826	147	15qD1	Deptor	0.596	1	232	1.6	0
chr9	80012837	80159536	147	9qE1	Myo6	0.237	1	153	-0.5	0
chr11	8726710	8873269	147	11qA1	Pkd1l1	0.006	0	0	1.2	0
chr16	33517413	33664221	147	16qB3	Slc12a8	0.553	1	167	1.8	0
chr8	34893115	35040313	147	8qA4	Rbpms	5.758	1	234	1.9	0
chr4	32891009	33037816	147	4qA5	Ankrd6	0.538	1	179	1.5	0
chr16	29231936	29378818	147	16qB2	Atp13a5	0.001	0	0	0	1				1	1
chr2	65458913	65605504	147	2qC1.3	Scn2a1	0.012	0.082	12	0.6	0
chr2	166391841	166539332	147	2qH3	Prex1	0.084	1	153	1.5	0
chr8	128275408	128422193	147	8qE2	Pcnxl2	0.024	0.77	113	0.9	0
chr5	98313706	98459981	146	5qE3	Antxr2	0.027	1	152	-0.9	0
chr15	10498733	10644386	146	15qA1	Rai14	2.394	1	175	1.3	0
chr8	130882972	131029362	146	8qE2	Nrp1	0.034	0.983	149	-1.1	0
chr4	101169252	101315404	146	4qC6	Dnajc6	0.573	1	152	1.2	0
chr3	9687478	9833679	146	3qA1	Pag1	0.061	1	149	1.3	0
chr5	94353802	94499571	146	5qE3	Gm16429	0	0	0	NULL	0
chr17	75117089	75262910	146	17qE2	Ttc27	1.132	1	168	1.3	0
chr10	26492282	26638454	146	10qA4	Arhgap18	0.059	1	154	-0.8	0
chr5	96019617	96165192	146	5qE3	Gm7971	0	0	0	NULL	0
chr10	9475344	9620877	146	10qA1	Stxbp5	0.238	1	150	-1.2	0
chr16	25959373	26105870	146	16qB1	Leprel1	0.017	1	158	-1.3	0
chrX	22796396	22942208	146	XqA2	Klhl13	2.197	1	152	-0.5	0
chr2	31169934	31316258	146	2qB	Hmcn2	0.033	0.241	81	1.3	0
chr11	107409243	107555140	146	11qE1	Helz	2.798	1	151	1.4	0.099		1			1
chr17	13897545	14043157	146	17qA1-A2	Mllt4	2.293	1	172	1.1	0
chr19	23377098	23522812	146	19qB	Mamdc2	0.006	0	0	1.2	0
chr12	76551869	76697232	145	12qC3	Ppp2r5e	1.376	1	167	1.2	0
chr3	83964360	84109368	145	3qF1	Trim2	0.686	0.801	121	1.8	0
chr9	71474315	71619409	145	9qD	Cgnl1	0.163	1	158	0.5	0
chr17	6106436	6251128	145	17qA1	Tulp4	0.663	1	147	1.4	0
chr15	57526219	57671388	145	15qD1	Zhx2	0.061	0.994	145	0.7	0
chr2	77889233	78034587	145	2qC3	4930440I19Rik	0.003	0.076	11	-1	0
chr2	32841885	32987174	145	2qB	Garnl3	0.387	1	150	1.6	0
chr10	38685320	38829994	145	10qB1	Lama4	0.012	0.188	61	0.4	0
chrX	110154203	110299126	145	XqE1	Chm	1.06	1	151	-0.5	0
chr18	53405315	53550477	145	18qD1	Snx24	0.264	0.999	151	0	0
chr19	37973525	38118067	145	19qC2	Myof	0.449	1	147	1.3	0
chr6	146837008	146980547	144	6qG3	Ppfibp1	0.366	1	149	1.1	0
chr2	139319648	139463410	144	2qF3	Sptlc3	0.003	0	0	-1	0
chr12	99672203	99816150	144	12qE	Kcnk10	0.004	0.201	29	0	0
chr5	32809556	32953438	144	5qB1	Gm15614	0.038	0.34	290	1.5	0
chr11	30405990	30549587	144	11qA4	Acyp2	0.319	1	178	1.1	0
chr6	29718442	29862310	144	6qA3.3	Ahcyl2	0.648	1	149	1.7	0
chr18	62483857	62627456	144	18qE1	Htr4	0.027	0.931	134	-1.1	0
chr5	123320676	123465089	144	5qF	Kdm2b	1.542	1	194	1.7	0
chr13	115748286	115892172	144	13qD2.2	Itga1	0.213	1	180	-0.3	0
chr19	9209646	9353665	144	19qA	Gm9750	0.013	0.277	186	1	0
chr10	18110127	18253698	144	10qA3	Nhsl1	0.511	1	339	1	0
chr3	53317860	53461277	143	3qC	Frem2	0.197	1	144	0.6	0
chr11	85871637	86014695	143	11qC	Brip1	0.583	1	195	0.4	0
chr4	108310070	108453403	143	4qC7	Zfyve9	0.673	1	143	1.2	0
chr4	62220880	62364052	143	4qB3	Rgs3	0.095	0.835	120	1.3	0
chr19	18824472	18967000	143	19qB	Trpm6	0.009	0	0	0.2	0
chr6	142770064	142912972	143	6qG3	St8sia1	0.525	1	144	1.4	0
chr5	136750865	136893764	143	5qG2	Gm16599	0.005	0	0	1.1	0
chr10	39451923	39595017	143	10qB1	Rev3l	1.592	1	156	1.1	0
chr14	4518486	4661428	143	14qA1	Gm3164	0	0	0	NULL	0
chrX	9650746	9794046	143	XqA1.1	Rpgr	0.103	0.45	65	-1	0
chr8	42076267	42219080	143	8qA4	Mtus1	1.292	1	169	1.8	0
chr15	91503605	91646551	143	15qE3	Lrrk2	0.052	1	144	-1	0
chr13	92981835	93124958	143	13qC3	Msh3	1.093	1	151	-0.2	0
chr7	22211704	22354860	143	7qA3	Gm6882	0	0	0	NULL	0
chr2	13572646	13715435	143	2qA1	St8sia6	0.071	1	145	-0.7	0
chr19	41674746	41818155	143	19qC3	Slit1	0.019	0.995	143	1.4	0
chr4	134117604	134260205	143	4qD3	Man1c1	0.126	1	153	1.3	0
chr10	14122390	14264842	142	10qA2	Gpr126	0.05	1	152	-0.9	0
chr1	12708625	12850452	142	1qA3	Sulf1	1.756	1	181	1.4	0
chr2	112333120	112474730	142	2qE3	Aven	0.759	1	156	1.1	0
chr7	74376048	74517744	142	7qC	Mef2a	0.987	0.998	156	-0.2	0
chr6	86799510	86941858	142	6qD1	Aak1	0.635	1	161	1.4	0
chr11	76070699	76212642	142	11qB5	Nxn	0.731	1	155	1.4	0
chr17	29964900	30107032	142	17qA3.3	Mdga1	0.062	0.458	62	1.1	0
chr14	73583479	73725629	142	14qD3	Rb1	0.848	0.999	155	0.5	0
chr3	83702130	83844083	142	3qF1	D930015E06Rik	1.105	1	164	1.3	0
chr13	107584518	107726995	142	13qD2.1	Ipo11	2.624	1	203	0.5	0
chr11	35651901	35794029	142	11qA4	Wwc1	0.83	1	146	1.3	0
chr9	42771924	42913801	142	9qA5.1	Arhgef12	1.489	1	146	1.2	0
chr16	49057598	49199217	142	16qB5	Myh15	0.001	0	0	-0.9	0
chr14	122277827	122420256	142	14qE5	Ubac2	0.912	1	165	1.3	0
chr11	57458943	57601016	142	11qB1.3	Galnt10	0.204	1	157	1.8	0
chr1	157122830	157264545	142	1qG3	Xpr1	0.326	1	207	0.3	0
chr11	62129927	62272043	142	11qB2	Ncor1	4.836	1	177	1.8	0
chr11	58807757	58949904	142	11qB1.3	Obscn	0.006	0	0	1	0
chr18	23910833	24052362	142	18qA2	Mapre2	0.325	1	145	0.8	0
chr6	55786888	55928729	142	6qB3	Ccdc129	0.002	0	0	-0.3	0
chr5	40005173	40146714	142	5qB3	Hs3st1	0.019	0.212	30	-0.9	0
chr15	58772798	58913581	141	15qD1	Mtss1	2.362	1	149	1.2	0
chr12	82961016	83101911	141	12qD1	Pcnx	0.367	1	143	1.1	0
chrX	157555124	157696145	141	XqF4	Scml2	0.055	0.685	104	-0.6	0
chr19	7131257	7272551	141	19qA	Macrod1	0.047	1	168	1.5	0
chr15	6249787	6390712	141	15qA1	Dab2	0.037	0.392	56	-0.7	0
chr10	61300983	61441856	141	10qB4	Col13a1	0.032	1	162	1.2	0
chr5	137217628	137359079	141	5qG2	Emid2	0.007	0	0	1.3	0
chr4	108733749	108874877	141	4qC7	Osbpl9	0.621	1	156	1.3	0
chr1	14159034	14300281	141	1qA3	Eya1	0.125	1	159	-0.4	0
chr6	40578829	40719122	140	6qB1	Mgam	0.002	0	0	-1.2	0
chr4	60961072	61100775	140	4qB3	Mup15	0	0	0	-1.9	0
chr10	68614181	68754539	140	10qB5.3	Rhobtb1	0.004	0	0	0.3	0
chr6	36338083	36478414	140	6qB1	Chrm2	0.003	0	0	-1.2	0
chr18	12139811	12279989	140	18qA1	6030446N20Rik	0.061	1	167	1.4	0
chr9	41283019	41423263	140	9qA5.1	D230004N17Rik	0.028	0.093	13	-0.7	0
chr15	44289098	44428689	140	15qB3.2	Pkhd1l1	0	0	0	-0.7	0
chr2	112105981	112246476	140	2qE3	Slc12a6	1.828	1	158	1.2	0
chr6	125496791	125636697	140	6qF3	Vwf	0.09	1	146	1.4	0
chr3	21975573	22115516	140	3qA3	Tbl1xr1	3.71	1	183	1.2	0
chr12	92639432	92778949	140	12qD3	Tshr	0.017	0.732	119	0.9	0
chrX	106029816	106170245	140	XqD	2810403D21Rik	0.321	1	167	-0.5	0
chr13	105921443	106061119	140	13qD1	Rnf180	0.05	1	166	-1	0
chr14	48740543	48880558	140	14qC1	Peli2	0.085	1	157	0	0
chr5	135882392	136020992	139	5qG2	Hip1	0.364	0.996	150	1.6	0
chr15	12963954	13103394	139	15qA1	Cdh6	0.029	1	145	0.6	0
chr7	111147313	111285919	139	7qE3	4930516K23Rik	0.001	0	0	0	0
chr4	148334643	148473985	139	4qE2	Pex14	1.02	1	147	1.5	0
chr13	36070665	36209226	139	13qA3.3	Lyrm4	0.654	1	164	0.3	0
chr2	114342151	114480700	139	2qE4	Atpbd4	0.683	1	166	-1.1	0
chr1	194723403	194861911	139	1qH6	Syt14	0.862	1	180	-0.1	0
chr9	105591746	105730415	139	9qF1	Col6a6	0.095	0.022	3	0.5	0
chr19	5133687	5273119	139	19qA	Pacs1	0.563	1	155	1.7	0.413			1		1
chr9	24361491	24500737	139	9qA4	Dpy19l2	0.004	0.093	13	-0.4	0
chr4	54957919	55096435	139	4qB3	Zfp462	2.508	1	183	1.4	0
chr3	144094066	144233145	139	3qH2	Hs2st1	1.311	1	163	1	0
chr5	90656214	90795211	139	5qE1	Ankrd17	5.379	1	160	0.3	0
chr14	7568198	7707669	139	14qA1	Gm3636	0	0	0	-1.6	0
chr4	106583305	106722299	139	4qC7	Ssbp3	1.125	1	165	1.7	0
chr11	18780432	18918961	139	11qA3.1	Meis1	0.142	1	145	-0.3	0
chr15	97077537	97216120	139	15qF1	Fam113b	0.555	1	161	1.5	0
chr1	171902438	172040632	138	1qH3	Ddr2	0.019	0.912	129	-0.8	0
chr16	78953252	79091342	138	16qC3.1	Tmprss15	0	0	0	-1	0
chr12	103366942	103505301	138	12qE	Slc24a4	0.002	0	0	1	0
chr7	35459486	35597730	138	7qB1	Chst8	0.045	1	146	1.5	0
chr1	24685382	24823144	138	1qA5	Lmbrd1	0.367	0.999	162	-1.2	0
chr6	40060251	40198352	138	6qB1	Gm5567	0.03	0.493	305	-0.8	0
chr6	31555210	31693316	138	6qA3.3	Gm13847	0.034	0.563	98	1	0
chr1	167795284	167932809	138	1qH2.3	Pou2f1	3.23	1	148	0.8	0
chr18	67247989	67386446	138	18qE1	Gnal	0.134	0.791	137	1.5	0
chr1	165709713	165847240	138	1qH2.2	Kifap3	0.521	1	151	0	0
chr1	107417715	107555585	138	1qE2.1	Pign	0.794	1	308	-0.8	0
chr13	94827750	94965364	138	13qD1	Lhfpl2	0.116	1	145	0.1	0
chr12	89112561	89250835	138	12qD2	Gm2075	0.011	0.173	36	NULL	0
chr8	63471991	63610143	138	8qB3.1	Nek1	0.539	1	143	0.2	0
chr14	65430438	65568684	138	14qD1	Hmbox1	0.854	1	147	1.2	0
chr9	54212964	54349567	137	9qA5.3	Dmxl2	0.202	1	151	0.3	0
chr12	84314731	84451882	137	12qD1	Dpf3	0.001	0.149	543	NULL	0
chr8	120022190	120159040	137	8qE1	Plcg2	0.566	1	147	1.4	0
chr4	141658304	141795316	137	4qE1	Kazn	0.799	0.999	158	1.2	0
chr2	50152329	50289487	137	2qC1.1	Gm13483	0.019	0.197	27	-0.5	0
chr10	10055506	10192124	137	10qA1	9130014G24Rik	0.001	0	0	-1.1	0
chr5	151476313	151613265	137	5qG3	Pds5b	1.704	1	160	1.4	0
chr7	140179245	140316037	137	7qF3	Ctbp2	8.904	1	176	1.3	0
chr10	114887366	115024836	137	10qD2	Lgr5	0.012	0.619	58	1	0
chr18	12758434	12895559	137	18qA1	Ttc39c	0.025	0.686	98	0.9	0
chr4	138908523	139045503	137	4qD3	Ubr4	1.57	1	144	1.7	0
chrX	52562961	52700117	137	XqA5	Gm14625	0	0	0	-1.1	0
chr3	97817460	97954290	137	3qF2.2	Notch2	0.587	1	148	0.1	0
chr18	74088139	74225013	137	18qE2	Mapk4	0.617	0.996	138	0.5	0
chr8	35892232	36028744	137	8qA4	Tnks	2.501	1	167	0.5	0
chr11	29273657	29410812	137	11qA3.3	Ccdc88a	0.857	1	143	1.2	0
chr8	11312804	11449287	136	8qA1.1	Col4a2	0.091	1	140	1	0
chr12	103806792	103943079	136	12qE	Itpk1	1.556	1	138	1.5	0
chr13	14155498	14291870	136	13qA1	Arid4b	2.6	1	201	0.5	0
chr6	147995780	148131280	136	6qG3	Far2	0.003	0	0	-0.3	0
chr13	51526409	51662453	136	13qA5	Shc3	0.012	0.191	30	1.1	0
chr11	104194542	104330175	136	11qE1	1700081L11Rik	7.179	1	185	1.8	0
chr16	23224812	23360421	136	16qB1	St6gal1	0.182	1	138	1.1	0
chr16	25286902	25422430	136	16qB1	Tprg	0.006	0.243	33	0.2	0
chr1	189039386	189175583	136	1qH5	Gpatch2	0.734	1	159	-0.7	0
chr18	9314041	9450148	136	18qA1	Ccny	1.175	1	156	-0.3	0
chr9	65756780	65892816	136	9qC	Csnk1g1	2.382	1	151	1.4	0
chr18	35278541	35414427	136	18qB1	Ctnna1	5.261	1	188	1.6	0
chr3	121747360	121882979	136	3qG1	Abca4	0.009	0	0	1.3	0
chr1	191031815	191167711	136	1qH6	Kcnk2	0.006	0.27	41	-0.8	0
chr6	31736674	31872270	136	6qA3.3	Gm13849	0.004	0.183	59	0.6	0
chr9	65539390	65675371	136	9qC	Zfp609	1.548	1	158	1.6	0
chr4	94405979	94541667	136	4qC5	Tek	0.446	1	138	0.6	0
chr3	145421638	145557241	136	3qH2	Ddah1	0.433	1	167	1.2	0
chr1	82447297	82583424	136	1qC5	Col4a4	0.001	0	0	-0.9	0
chr7	89319727	89455923	136	7qD3	Sh3gl3	0.25	1	141	0.3	0
chrX	130620959	130756495	136	XqE3	Nox1	0.477	0.347	79	0.6	0
chr13	59550895	59686588	136	13qB2	Agtpbp1	0.47	0.793	115	1.6	0
chr14	67254087	67390005	136	14qD1	Adra1a	0.006	0.037	5	-0.1	0
chr2	60255599	60391365	136	2qC1.1	Pla2r1	0.003	0	0	0.8	0
chr9	8544431	8680565	136	9qA1	Trpc6	0.021	0.316	51	-0.9	0
chr12	111685517	111821271	136	12qF1	Ppp2r5c	1.448	1	138	1.5	0
chr1	158734296	158869757	135	1qH1	Ralgps2	0.626	1	165	1.7	0
chr7	127553160	127688327	135	7qF2	Abca16	0.023	0.543	74	-0.2	0
chr10	45297634	45432151	135	10qB2	Hace1	0.932	1	153	-0.7	0
chr5	71352295	71487088	135	5qC3.1	Gabra2	0.008	0	0	-0.9	0
chr1	82583495	82718634	135	1qC5	Col4a3	0.002	0	0	-0.1	0
chr10	40069113	40203624	135	10qB1	Cdk19	1.043	1	154	1.5	0
chrX	148235349	148369960	135	XqF3	Huwe1	7.189	1	145	1	0
chr4	3605261	3740269	135	4qA1	Lyn	0.071	0.928	127	0.6	0
chr4	59639082	59774311	135	4qB3	E130308A19Rik	0.618	1	180	1	0
chr5	68423073	68557637	135	5qC3.1	Grxcr1	0.001	0.045	6	-0.9	0
chr14	4843878	4978876	135	14qA1	Gm3264	0.001	0.044	6	NULL	0
chr5	100649458	100784138	135	5qE4	Gm8091	0.004	0	0	1	0
chr12	82298901	82434167	135	12qD1	Slc8a3	0.009	0	0	0.6	0
chr15	85729187	85864207	135	15qE2	Celsr1	0.165	1	137	1.4	0
chr1	140381290	140516273	135	1qE4	Nek7	0.922	1	149	-1.2	0
chr17	73457324	73592708	135	17qE2	Lclat1	0.454	1	147	-0.9	0
chrX	156426364	156561283	135	XqF4	Map3k15	0.36	1	155	0.3	0
chr7	107855164	107990142	135	7qE3	Fam168a	2.783	1	147	1.5	0
chr3	86590072	86724803	135	3qF1	Dclk2	0.238	1	154	1.3	0
chr12	110132481	110266662	134	12qF1	Wdr25	0.598	1	137	1	0
chrX	75694951	75829235	134	XqB	Prrg1	0.095	1	136	-0.5	0
chr19	46227047	46360999	134	19qC3	Gbf1	0.765	1	136	1.5	0
chr14	8650470	8784102	134	14qA1	Flnb	2.491	1	185	1.4	0
chr12	109792929	109926723	134	12qF1	Evl	0.906	1	136	1.4	0
chr2	44839153	44972915	134	2qB	Zeb2	0.087	0.987	132	-0.5	0
chr2	105376236	105510487	134	2qE3	Pax6os1	0.002	0	0	0.2	0
chr5	32535080	32668893	134	5qB1	Plb1	0.007	0	0	0.8	0
chr7	136400607	136534821	134	7qF3	Ppapdc1a	0.002	0	0	-0.5	0
chrX	101732307	101866403	134	XqD	Zdhhc15	0.459	1	144	0.3	0
chr2	9836178	9970223	134	2qA1	Taf3	0.997	1	136	1	0
chr1	129999882	130134312	134	1qE4	R3hdm1	2.071	1	149	1	0
chr2	120541889	120675864	134	2qE5	Cdan1	0.466	1	137	1.1	0
chr18	62767193	62901041	134	18qE1	Spink13	0.002	0	0	-0.3	0
chr3	88639152	88772903	134	3qF1	Gon4l	0.842	0.836	137	1.6	0
chr11	78826941	78959909	133	11qB5	Ksr1	0.213	1	138	1.6	0
chr11	75859727	75993149	133	11qB5	Vps53	0.366	1	152	1.7	0
chr5	139493259	139625955	133	5qG2	Prkar1b	0.034	0.759	93	1.5	0
chrX	101475995	101609195	133	XqD	Abcb7	1.19	1	198	0.7	0
chr13	42147389	42280395	133	13qA4	Hivep1	0.211	1	166	-0.7	0
chr1	184693990	184826729	133	1qH5	Susd4	0.138	1	135	-0.1	0
chr11	65981536	66114739	133	11qB3	Gm12296	0.001	0	0	-1.4	0
chr17	7374463	7507662	133	17qA1	Rps6ka2	0.311	1	134	0.8	0
chr18	47395251	47528524	133	18qC	Sema6a	0.622	0.931	126	-0.3	0
chr7	59117384	59250345	133	7qB5	Gas2	0.672	1	211	-0.7	0
chr16	4287528	4420498	133	16qA1	Adcy9	0.104	1	146	1.5	1		1			1
chr2	93041916	93174663	133	2qE1	Tspan18	0.015	0.595	79	0.5	0
chr5	8490333	8622952	133	5qA1	Rundc3b	0.095	1	141	0.5	0
chr10	19868276	20001393	133	10qA3	Mtap7	1.449	1	164	1.1	0
chr2	57090045	57223130	133	2qC1.1	Gpd2	1.273	1	157	0.7	0
chr17	69506149	69639325	133	17qE1.3	Epb4.1l3	0.099	0.997	134	-0.2	0
chr9	98187853	98320946	133	9qE3.3	Nmnat3	0.044	0.661	88	-0.7	0
chr19	37624907	37757735	133	19qC2	Exoc6	0.38	1	136	1.3	0
chr11	87040407	87172525	132	11qC	Ppm1e	0.045	1	134	1.4	0
chr18	64688632	64820654	132	18qE1	Atp8b1	0.029	1	145	0.6	0
chr11	103683095	103815370	132	11qE1	Nsf	1.319	1	148	1.5	0
chr5	20798778	20930495	132	5qA3	Ccdc146	0.005	0.159	21	0.7	0
chr7	35697397	35829729	132	7qB1	Pepd	0.5	0.999	150	1.2	0
chr4	30591745	30723813	132	4qA5	4930556G01Rik	0.003	0.108	20	-1.1	0
chr5	106128987	106261455	132	5qE5	Lrrc8d	1.434	1	177	1.4	0
chr2	102498815	102630941	132	2qE2	Slc1a2	0.002	0	0	-1.2	0
chr7	68234468	68366812	132	7qC	A230006K03Rik:1	0.012	0.499	66	-0.9	0
chr4	23187930	23319650	132	4qA3	Gm11884	0.004	0.171	36	-0.9	0
chr18	49992666	50124739	132	18qD1	Dmxl1	2.462	1	143	0.6	0
chr1	151676747	151808420	132	1qG1	Pla2g4a	0.052	1	134	-1.3	0
chr7	108812146	108943974	132	7qE3	Clpb	1.047	1	156	1.5	0
chr7	74658296	74790122	132	7qC	Lrrc28	1.507	1	139	0.3	0
chr10	110601857	110734303	132	10qD1	Osbpl8	0.59	1	134	1	0
chr3	146515330	146646973	132	3qH2	Ttll7	0.013	0.767	101	-0.8	0
chrX	102992953	103124736	132	XqD	Atrx	4.418	1	144	0.9	0
chrX	159339169	159470440	131	XqF4-F5	Ctps2	0.323	0.997	138	1.4	0
chr6	38073173	38204009	131	6qB1	D630045J12Rik	0.234	1	132	1.4	0
chr12	41041632	41172377	131	12qB1	Zfp277	1.366	1	158	0.6	0
chr15	63760651	63892010	131	15qD1	Fam49b	2.694	1	137	0.8	0
chr5	124568698	124699769	131	5qF	Pitpnm2	0.544	1	138	1.2	0
chr4	148550427	148681802	131	4qE2	Kif1b	0.767	1	141	1.5	0
chr1	167259641	167390596	131	1qH2.3	Dcaf6	0.483	0.999	136	0.6	0
chr9	20237203	20367726	131	9qA3	Gm17523	0.015	0.077	10	1.5	0
chr14	61252837	61383393	131	14qD1	Spata13	0.529	1	134	1	0
chr15	35939233	36070155	131	15qB3.1	Rgs22	0.065	1	165	1.5	0
chr17	71693828	71824683	131	17qE1.3	Smchd1	1.728	1	140	1.4	0
chrX	54123339	54254735	131	XqA5	Gpr112	0.002	0	0	-0.5	0
chr5	33206349	33336882	131	5qB1	Depdc5	1.285	1	132	1.3	0
chr15	37162790	37293324	131	15qB3.1	Grhl2	1.011	1	192	1.4	0
chr1	89984387	90115579	131	1qD	Ugt1a8	0.016	0.808	106	-0.3	0
chr11	72609727	72740622	131	11qB4	Zzef1	0.546	1	165	1.6	0
chr12	77681474	77811534	130	12qC3	Spnb1	0.102	0.884	115	1.2	0
chr3	122432075	122562292	130	3qG1	Pde5a	0.117	1	134	0.4	0
chr15	25773018	25903442	130	15qB1	Fam134b	0.061	1	141	1	0
chr7	105068464	105198173	130	7qE2	Gdpd4	0.007	0.116	148	0.9	0
chr11	78380669	78510927	130	11qB5	Nlk	1.65	1	147	1.6	0
chrX	99709313	99839585	130	XqD	Phka1	0.151	1	140	0.3	0
chr16	57624370	57754850	130	16qC1.1	Col8a1	0.008	0	0	-0.9	0
chr19	24169012	24299444	130	19qB	Tjp2	3.474	1	137	1.3	0
chr10	24888895	25018969	130	10qA4	Akap7	0.286	1	158	1.3	0
chr5	108173813	108304126	130	5qF	Evi5	1.548	1	142	1.4	0
chr12	16677420	16807692	130	12qA1.1	Greb1	0.067	1	142	0.8	0
chr16	13538056	13668263	130	16qA1	Parn	1.493	1	151	1.5	0
chr9	107301942	107431677	130	9qF1	Cacna2d2	0.02	0.764	104	1.5	0
chr14	3224372	3354810	130	14qA1	Gm2956	0	0	0	NULL	0
chr10	21878391	22008655	130	10qA3	H60b	0.059	0.363	51	0.7	0
chr14	32513200	32643601	130	14qB	Ankrd28	2.353	1	150	1	0
chr1	92895303	93025521	130	1qD	Lrrfip1	0.505	0.998	146	0.7	0
chr11	93857404	93987399	130	11qD	Spag9	1.192	1	137	1.7	0
chr6	49035219	49164953	130	6qB2.3	Igf2bp3	1.441	1	146	1.5	0
chr15	34236435	34366029	130	15qB3.1	Matn2	0.039	1	147	1.5	0
chr10	34008093	34138358	130	10qB1	Nt5dc1	0.632	1	160	1.1	0
chr8	60002624	60131829	129	8qB2	Galnt7	0.795	1	167	0.9	0
chr2	24646288	24775129	129	2qA3	Ehmt1	2.853	1	137	1.6	0
chr4	53043658	53172767	129	4qB2	Abca1	0.402	1	135	-0.1	0
chr12	25516463	25645166	129	12qA1.3	Mboat2	0.439	1	143	1.3	0
chr7	89797123	89926362	129	7qD3	Eftud1	1.355	1	208	1	0
chr17	83750270	83879701	129	17qE4	Eml4	2.53	1	132	1.6	0
chr14	87816389	87945315	129	14qE1	Tdrd3	0.553	1	143	-0.3	0
chr19	40686855	40816092	129	19qC3	Entpd1	0.009	0.26	35	0.9	0
chr11	81990158	82119192	129	11qC	Ccl1	0.002	0	0	-0.7	0
chr1	82313026	82441941	129	1qC5	Rhbdd1	0.362	1	167	-1.4	0
chr1	45431165	45560127	129	1qC1.1	Col5a2	0.022	1	139	-1.1	0
chr8	3150921	3279617	129	8qA1.1	Insr	0.304	1	183	0.7	0
chr6	115311238	115440419	129	6qE3	Pparg	0.002	0.002	27	1.1	0
chr1	157405249	157534363	129	1qG3	Acbd6	0.704	1	151	0.4	0
chrX	100378309	100507121	129	XqD	4930519F16Rik	1.248	1	148	1.1	0
chr7	119369369	119498708	129	7qF1	Mical2	0.023	0.991	129	0.4	0
chr2	11093739	11222853	129	2qA1	Prkcq	0.002	0	0	-0.6	0
chr16	4084047	4213404	129	16qA1	Crebbp	2.613	1	136	1.4	1		1			1
chr15	3976382	4105344	129	15qA1	Oxct1	0.494	1	181	-0.1	0
chr2	160569662	160698734	129	2qH2	Zhx3	0.071	1	168	1	0
chr9	111463940	111592852	129	9qF3	Stac	0.005	0	0	-0.6	0
chr18	50139080	50266827	128	18qD1	Tnfaip8	0.254	0.927	119	0.6	0
chr2	6114296	6242657	128	2qA1	A230108P19Rik	0.003	0	0	1	0
chr10	34203205	34331032	128	10qB1	Frk	0.027	1	133	0	0
chr7	137535039	137663475	128	7qF3	Ate1	1.907	1	176	1.3	0
chr18	65425182	65553542	128	18qE1	Alpk2	0	0	0	1.1	0
chr8	19888054	20016359	128	8qA1.3	Gm17279	0.013	0.68	90	-1.2	0
chr19	46961320	47089643	128	19qC3	Nt5c2	1.531	1	148	1.6	0
chr15	77822177	77950458	128	15qE1	Cacng2	0.002	0	0	1.5	0
chr8	19883286	20011364	128	8qA1.3	A430108E01Rik	0.703	0.422	53	-1.2	0
chr14	66772093	66899889	128	14qD1	Ptk2b	0.52	1	130	0.9	0
chr12	85134983	85262884	128	12qD1	Numb	0.731	1	134	1.5	0
chr10	20672390	20800234	128	10qA3	Ahi1	0.165	1	193	1.1	0
chr10	76753470	76881015	128	10qC1	Adarb1	0.22	0.996	128	1.9	0
chr10	40403087	40530889	128	10qB1	9030224M15Rik	0.015	0.563	72	0.6	0
chrX	39502493	39630362	128	XqA4	Stag2	2.049	1	165	0.8	0
chr1	157692095	157820020	128	1qG3	Cep350	0.567	1	130	1	0
chr5	141348952	141476550	128	5qG2	Card11	0.003	0	0	0.6	0
chr15	27396431	27524664	128	15qB1	Ank	0.127	1	133	0.3	0
chrX	147778717	147906385	128	XqF3	Fam120c	0.408	1	133	1	0
chr11	69234310	69362612	128	11qB3	Dnahc2	0.024	0.383	49	1.7	0
chr12	4924209	5050853	127	12qA1.1	Atad2b	1.353	1	166	1.2	0
chr2	43410848	43538235	127	2qB	Kynu	0.033	0.995	138	-0.9	0
chr5	36100528	36227622	127	5qB3	Ablim2	0.025	1	136	1.3	0
chr9	96096693	96224065	127	9qE3.3	Tfdp2	1.808	1	139	1.4	0
chr14	13989901	14117152	127	14qA1	Gm5087	0.005	0.115	15	-0.8	0
chr2	93535787	93662725	127	2qE1	Ext2	0.313	1	164	1.2	0
chr15	85166767	85294266	127	15qE2	Atxn10	2.845	1	158	1.6	0
chr2	69735302	69862070	127	2qC2	Ubr3	2.486	1	140	1.2	0
chrX	103778524	103905896	127	XqD	Gm5127	0.003	0.086	11	-0.7	0
chr2	49921981	50049084	127	2qC1.1	Lypd6	0.091	1	130	-0.1	0
chr3	74841828	74968956	127	3qE3	Zbbx	0.15	0.996	145	-1.1	0
chrX	108683539	108810688	127	XqE1	Hdx	0.365	1	132	-0.7	0
chr11	43588107	43714712	127	11qB1.1	Adra1b	0.003	0	0	0.9	0
chr2	63809563	63936095	127	2qC1.3	Fign	0.213	1	136	-1.2	0
chr8	60650231	60777663	127	8qB3.1	Gm17517	0.001	0	0	-1.2	0
chrX	39148167	39273851	126	XqA4	Thoc2	2.007	0.934	122	0.8	0
chr16	38901583	39027272	126	16qB4	Igsf11	0.06	1	139	-0.6	0
chr11	110260435	110386836	126	11qE2	Map2k6	0.284	1	131	-0.6	0
chr11	60040215	60166407	126	11qB2	Tom1l2	0.404	1	144	1.4	0
chr2	79170699	79296942	126	2qC3	Cerkl	0.082	1	132	-0.5	0
chr16	94791616	94917124	126	16qC4	Dyrk1a	2.77	1	205	1.9	0
chr10	72664146	72789775	126	10qB5.3	Gm15398	0.006	0.326	41	-0.9	0
chr3	94464506	94590414	126	3qF2.1	Cgn	0.191	0.484	51	1.3	0
chr16	30955712	31081518	126	16qB2	AI480653	0.387	1	263	1.1	0
chr2	72930857	73056981	126	2qC3	Ola1	2.126	0.972	195	1.5	0
chr16	17280443	17406407	126	16qA3	Pi4ka	0.609	1	129	1.6	0
chr17	68046604	68171985	125	17qE1.1	Lama1	0.391	1	128	0.2	0
chr1	39957757	40083155	125	1qB	Map4k4	3.093	1	141	1.2	0
chr11	33873960	33998554	125	11qA4	4930469K13Rik	0.002	0	0	-0.7	0
chr2	125684844	125810035	125	2qF1	Galk2	0.903	1	176	0.4	0
chr13	47218088	47343360	125	13qA5	Rnf144b	0.067	1	127	1	0
chr17	57498108	57622952	125	17qD	Emr1	0	0	0	0.1	0
chrX	98293124	98417902	125	XqC3	Snx12	0.601	1	137	1	0
chr2	168301909	168427157	125	2qH3	Nfatc2	0.113	0.923	118	1.2	0
chr3	38785861	38910907	125	3qB	Fat4	0.003	0	0	-1.2	0
chr6	66846390	66971344	125	6qC1	Gng12	0.381	1	141	1.6	0
chr2	93872845	93998121	125	2qE1	Hsd17b12	2.937	1	148	1.4	0
chrX	100892752	101017304	125	XqD	Slc16a2	0.06	1	128	0.9	0
chr17	14416512	14541797	125	17qA2	Smoc2	0.006	0	0	0.5	0
chr4	141446352	141570997	125	4qE1	Fhad1	0.008	0	0	1.2	0
chr4	120077885	120202804	125	4qD2.2	Scmh1	0.75	1	128	0.8	0
chr11	68505060	68630134	125	11qB3	Myh10	0.775	0.996	126	1.4	0
chr1	89991636	90116577	125	1qD	Ugt1a7c	0.016	0.848	106	-0.3	0
chr4	105988817	106113927	125	4qC7	Usp24	2.289	1	156	1.1	0
chr2	38921733	39046254	125	2qB	Scai	0.966	1	125	0.5	0
chr5	125079672	125204824	125	5qF	Atp6v0a2	0.187	1	126	1.5	0
chr1	43502595	43627360	125	1qB-C1	Nck2	0.944	1	134	-1	0
chr9	75623170	75748117	125	9qD	Bmp5	0.001	0	0	-0.1	0
chr19	6418730	6544169	125	19qA	Nrxn2	0.103	0.915	115	1	0
chr1	12856629	12981258	125	1qA3	Slco5a1	0.15	1	126	1.9	0
chr2	130732230	130856069	124	2qF1	Atrn	0.725	1	163	1.5	0
chr16	35541230	35664818	124	16qB3	Sema5b	0.109	0.998	124	1	0
chr10	74523640	74647668	124	10qB5-C1	Bcr	0.394	1	136	1	0
chr3	62142265	62266143	124	3qE1	Arhgef26	0.132	0.998	124	-1	0
chr2	6243712	6367436	124	2qA1	Usp6nl	0.766	1	150	0.3	0
chr2	60436348	60560700	124	2qC1.2	Itgb6	0.005	0.024	3	-0.3	0
chr18	5210028	5334437	124	18qA1	Zfp438	0.256	1	170	-0.5	0
chrX	11613865	11737481	124	XqA1.1	Bcor	0.414	1	126	0.9	0
chr4	59327554	59451505	124	4qB3	Susd1	0.247	1	126	0.6	0
chr7	121558794	121682765	124	7qF1	Pde3b	0.193	1	127	0.2	0
chr12	89256671	89380725	124	12qD2-D3	Gm6804	0.01	0.216	27	-0.3	0
chr12	47795503	47919762	124	12qB3	Nova1	0.239	0.992	125	-1.2	0
chr1	109050516	109174938	124	1qE2.1	Serpinb3b	0	0	0	-1.1	0
chrX	101272772	101396524	124	XqD	C77370	1.523	1	136	0.6	0
chr7	104937050	105060891	124	7qE2	Pak1	0.772	1	148	1	0
chr1	88051354	88174859	124	1qC5	Armc9	0.378	0.851	196	1.7	0
chr4	117222969	117346902	124	4qD2.1	Eri3	0.977	1	149	1.3	0
chr1	89223572	89347371	124	1qD	Gigyf2	2.986	1	131	1.9	0
chr14	57893870	58017333	123	14qC3	Cryl1	0.142	1	125	1.1	0
chr5	20264480	20387942	123	5qA3	Phtf2	1.95	1	132	1.3	0
chr3	132775241	132897913	123	3qG3	D630013G24Rik	0.092	0.744	92	-0.2	0
chrX	57309130	57432266	123	XqA6	Mcf2	0.559	1	137	0.6	0
chr2	37298798	37421974	123	2qB	Rabgap1	3.474	1	184	0.4	0
chr9	25289131	25411695	123	9qA4	Eepd1	0.064	1	136	-0.8	0
chr2	153233197	153355707	123	2qH1	8430427H17Rik	0.029	0.892	111	1.5	0
chr11	75934488	76057227	123	11qB5	Glod4	0.538	0.764	152	1.6	0
chr16	33380860	33503989	123	16qB3	Zfp148	3.214	1	186	1.4	0
chr6	53523377	53646001	123	6qB3	Creb5	0.089	1	134	-0.3	0
chr3	58791091	58913689	123	3qD	Gm10071	0.106	0.85	353	-0.5	0
chr11	26371321	26493999	123	11qA3.3	Vrk2	0.4	1	127	-0.4	0
chr19	41158470	41281264	123	19qC3	Tll2	0.002	0	0	0.7	0
chr16	32985939	33108687	123	16qB3	Gm17106	0.159	0.407	50	1.4	0
chr8	88241455	88364848	123	8qC3	Itfg1	1.243	1	141	1	0
chr13	56874473	56997150	123	13qB1	Trpc7	0.001	0	0	-0.1	0
chr18	67647862	67770443	123	18qE1	Spire1	0.582	1	138	1.6	0
chr2	164937006	165060353	123	2qH3	Cdh22	0.008	0	0	1.4	0
chr5	54389761	54512296	123	5qC1	Stim2	0.492	1	138	0.1	0
chr3	100366129	100489426	123	3qF2.2	Man1a2	1.461	1	139	0.4	0
chr6	142034281	142157042	123	6qG2	Slco1a6	0.001	0	0	-0.9	0
chr15	83433012	83555451	122	15qE1-E2	Scube1	0.01	0	0	1.5	0
chrX	147632682	147754695	122	XqF3	Wnk3-ps	0.597	1	146	0.8	0
chr7	29788358	29910170	122	7qB1	Ryr1	0.105	1	133	1.3	0
chr14	57021533	57143869	122	14qC3	Rnf17	0.691	1	130	0.9	0
chr14	27232653	27354417	122	14qA3	Slmap	2.765	1	159	1.6	0
chr6	39553235	39675462	122	6qB1	Braf	2.147	1	133	1.7	0
chr11	95573986	95696429	122	11qD	Zfp652	1.396	0.739	75	1.5	0
chr13	119458597	119580922	122	13qD2.3	Fgf10	0.045	0.649	80	-1	0
chr8	109960297	110082494	122	8qD3	Wwp2	1.094	1	128	1.8	0
chr3	8802145	8923918	122	3qA1	Mrps28	1.626	1	160	0.9	0
chr5	143752571	143874673	122	5qG2	Rnf216	1.116	1	217	1.3	0
chr2	156246644	156368950	122	2qH1	Epb4.1l1	0.639	1	124	1.3	0
chr9	32443805	32565405	122	9qA4	Ets1	0.061	0.517	68	-1.2	0
chr14	80236518	80358533	122	14qD3	Gm6999	0.184	0.254	32	-0.6	0
chr2	20769545	20890508	121	2qA3	Arhgap21	1.953	1	142	1.1	0
chr7	144385355	144506128	121	7qF4	Ebf3	0.008	0	0	0.6	0
chr15	18627438	18748529	121	15qA2	C030047K22Rik	0.002	0	0	-1	0
chr2	29475239	29596498	121	2qB	Rapgef1	1.754	1	127	1.5	0
chr5	149685907	149806799	121	5qG3	Katnal1	0.052	0.529	63	1.4	0
chr17	66001065	66122092	121	17qE1.1	Rab31	0.605	1	141	1.6	0
chr9	75862661	75984157	121	9qD	Hmgcll1	0.209	1	137	-1.1	0
chr7	127347474	127468866	121	7qF2	Abca14	0.005	0.283	34	-0.7	0
chr19	3454932	3575749	121	19qA	Ppp6r3	3.298	1	133	1.4	0
chr15	66211419	66332472	121	15qD2	Lrrc6	0.007	0	0	-1.1	0
chr7	17079821	17200342	121	7qA2	Grlf1	3.171	1	138	1.5	0
chr12	55993975	56115335	121	12qC1	Baz1a	0.96	0.812	129	1.5	0
chr7	88358481	88479419	121	7qD3	Pde8a	0.261	1	210	1.7	0
chr14	61403402	61524315	121	14qD1	Mipep	0.28	1	135	1.3	0
chr3	32716467	32836993	121	3qA3	Usp13	0.306	1	123	1	0
chr2	163028860	163149906	121	2qH3	Tox2	0.007	0	0	1.6	0
chr12	4599813	4720756	121	12qA1.1	Itsn2	0.684	1	146	1.7	0
chr4	62875037	62996025	121	4qB3	Col27a1	0.03	0.98	120	-0.1	0
chr6	85163044	85283416	120	6qC3	Sfxn5	0.17	1	132	1.5	0
chr3	87421480	87541956	120	3qF1	Arhgef11	0.45	1	128	1.4	0
chr5	37419573	37539240	120	5qB3	Jakmip1	0.062	0.827	99	1.4	0
chr9	35377868	35497903	120	9qA4	Pate2	0.085	1	121	-0.5	0
chr1	52043991	52164032	120	1qC1.1	Stat4	0.108	0.821	111	0.6	0
chr9	79446797	79566638	120	9qE1	Col12a1	0.018	1	127	-0.7	0
chr11	59474806	59594362	120	11qB1.3	Mprip	0.763	0.994	124	1.7	0
chr6	134396493	134516983	120	6qG1	Lrp6	1.783	1	126	1.4	0
chr11	5469686	5589340	120	11qA1	Ankrd36	0.005	0	0	1.7	0
chr1	36619538	36740028	120	1qB	Fam178b	0.506	1	125	1.7	0
chr10	116213600	116333935	120	10qD2	Gm239	0.008	0	0	1	0
chr5	113919466	114039679	120	5qF	Wscd2	0.022	0.401	60	1.2	0
chr3	57259570	57379832	120	3qD	Wwtr1	0.569	1	138	-0.2	0
chr14	63456526	63575723	119	14qD1	Wdfy2	0.579	1	161	1.1	0
chr7	141457944	141577344	119	7qF3	D7Ertd443e	0.003	0	0	-0.5	0
chr4	58448126	58566770	119	4qB3	Lpar1	0.23	0.998	124	-0.5	0
[truncated: 21,789 more rows]
