# Supplementary material for: Large transcription units unify copy number variants and common fragile sites arising under replication stress
Source: Genome Res. 2015 Feb;25(2):189–200. doi: 10.1101/gr.177121.114 (PMC4315293; doi:10.1101/gr.177121.114)
Supplement: Supplemental Material [file supp_gr.177121.114_Table_S3C.xlsx]

## Sheet: 090
									number_of_CNVs
chrom	start	end	size(Kb)	band	RPKM	gene(s)	rep_timing	CNV_coverage	APH	HU	IR	NT	all
chr3	115516500	117717500	2201	3q13.31-32	0.186	BZW1P2,LINC00901,LINC00903,LSAMP,LSAMP-AS1,MIR4447,PTMAP8,RN7SL582P,RN7SL815P,RNU5E-8P,RNU6-1200P,RP11-384F7.2,RP11-768G7.1,RP11-768G7.2,RP11-768G7.3,TUSC7	S3(2.5)	0.965	11	20	7	3	41
chr7	77609500	79084500	1475	7q21.11	0.284	AC004945.1,AC006355.3,AC007237.2,MAGI2,MAGI2-AS1,MAGI2-AS2,MAGI2-AS3,MAGI2-IT1,RNU6-337P,RNU6-530P,RP5-1185I7.1,RPL13AP17	S2(4.2)	0.452	3	1		1	5
chr3	174156500	175527551	1371	3q26.31	0.325	MIR4789,NAALADL2,NAALADL2-AS1,NAALADL2-AS2,NAALADL2-AS3,RN7SKP40,RNU4-91P,RNU6-1233P,RNU6-1317P,RP11-432A8.2,RP11-744O11.2,UBE2V1P2,snoU13:291	S3(3.2)	0.168	2	1	1		4
chr20	13975500	15286500	1311	20p12.1	0.031	AIMP1P1,FLRT3,MACROD2,MACROD2-AS1,MACROD2-IT1,RN7SL864P,RNA5SP475,RNF11B,RNU6-1159P,RNU6-115P,RNU6-228P,RP5-974N19.1,RPS10P2,RPS3P1,SEL1L2	S4(2.3)	0.053	1				1
chr7	69062500	70282500	1220	7q11.22	1.461	AUTS2	S4(1.6)	0.998	6	5	8		19
chr13	93879500	95083500	1204	13q31-32	0.274	GPC6,GPC6-AS1,GPC6-AS2,HNRNPA1P29,RNA5SP35,SNORD22	S3(3.3)	0.262		1			1
chr16	82660500	83831265	1171	16q23.3	0.853	AC009142.1,AC099506.1,CDH13,CTD-3253I12.1,MIR3182,RN7SL134P,RP11-22H5.2,RP11-298D21.1,RP11-298D21.2,RP11-298D21.3,RP11-483P21.2,RP11-543N12.1	S3(3.2)	0.224	1	1	1		3
chr2	212240500	213403500	1163	2q34	0.072	AC105921.5,ERBB4,MIR548F2,MTND2P23,RNA5SP119	S4(1.7)	0.254	1				1
chr3	75865500	76961500	1096	3p12.3	0.052	AC026877.1,ROBO2,RP11-550F7.1,Y_RNA:526	S4(1.9)	0.514	1	2	2		5
chr2	205410500	206491500	1081	2q33.3	0.54	AC008171.1,PARD3B	S3(3.3)	0.533	1	1	1		3
chr10	52748500	53794500	1046	10q11-21	1.006	AC022537.1,AC068062.1,CSTF2T,MIR605,PRKG1,RP11-40C11.2,RP11-539E19.2,RP11-96B5.3,RSU1P3	S3(3.2)	0.638	2	2	1	1	6
chr2	133429152	134433500	1004	2q21.2	0.144	AC010890.1,AC011243.1,AC011755.1,AC016909.1,AC016909.2,NCKAP5,NCKAP5-IT1,RN7SKP154,RN7SKP93,RNU6-579P	S2(4.3)	0
chr5	100536500	101491500	955	5q21.1	0.132	CTD-2333K2.1,OR7H2P,RN7SL802P,RNA5SP188,RP11-1152B5.1	G2(1.4)	0.012			1		1
chrX	95938500	96887500	949	Xq21.33	0.27	DIAPH2,DIAPH2-AS1,RN7SL74P,RP11-392M9.2,RPA4,Y_RNA:804	S4(2.2)	0.057		1			1
chr7	40174574	41114500	940	7p14.1	0.187	AC004988.1,AC005029.1,AC005160.3,AC006023.8,C7orf10	S2(4.1)	0
chr3	173113500	174050500	937	3q26.31	0.994	NLGN1,NLGN1-AS1,RN7SKP234,RP11-393N4.1,RP11-521A24.1	S3(2.7)	0.034			1		1
chr7	110274500	111203500	929	7q31.1	0.097	AC003989.3,AC003989.4,AC005161.1,IMMP2L,IMMP2L-IT1,LRRN3,snoU13:399	S4(2.4)	0.108	3				3
chr5	155107500	156085500	928	5q33.2-3	0.414	CTB-56J15.1,RNA5SP199,SGCD	S4(2.2)	0
chr1	71835500	72749500	914	1p31.1	0.444	GDI2P2,NEGR1,NEGR1-IT1,RP11-175G14.2,RP11-82L20.1,ZRANB2-AS2	S4(2)	0.711	6	1			7
chr16	78132500	79013500	881	16q23.1	0.042	LSM3P5,RP11-190D6.2,RP11-264L1.3,RP11-264L1.4,RP11-319G9.3,RPS3P7,WWOX	S4(1.7)	0.846	6		2	1	9
chr7	132937500	133812110	875	7q33	0.634	AC007790.4,AC083875.1,AC083875.2,COX5BP3,EXOC4,LRGUK	S4(2.4)	0.407	1				1
chr8	100024500	100896500	872	8q22.2	1.305	AC018442.1,AP004289.1,AP004289.2,AP004290.1,COX6C,CTD-2340D6.1,CTD-2340D6.2,MIR599,MIR875,RN7SL350P,RP11-402L5.1,RP11-402L5.2,RP11-410L14.2,VPS13B,Y_RNA:705	S2(3.6)	0.127		1			1
chr1	97518500	98386605	868	1p21.3	1.511	DPYD,DPYD-AS1,DPYD-AS2,DPYD-IT1,RP11-272L13.2,RP11-272L13.4,RPL26P9,SEC63P1	S2(4)	0.019				1	1
chr6	72312500	73177500	865	6q13	0.607	AL445256.1,RIMS1,RNU4-66P,RP5-1046G13.2	S2(3.7)	0
chr11	19367500	20214500	847	11p15.1	1.811	DBX1,MIR4486,MIR4694,NAV2,NAV2-AS1,NAV2-AS2,NAV2-AS3,NAV2-AS4,NAV2-AS5,NAV2-IT1,RNA5SP335,RP11-359E10.1,SNORA1:1	S1(4.9)	0
chr4	142920500	143767500	847	4q31.21	0.751	INPP4B,LSM3P4,RP11-223C24.1,RP11-223C24.2,RPL5P13	S2(3.5)	0
chr18	7567500	8412126	845	18p11.23	0.831	AP000897.1,AP001094.1,AP005118.1,AP005227.1,PTPRM,RP11-376P6.3,RP11-678G15.1,RP11-678G15.2,RP11-789C17.1,RP11-789C17.3,RP11-789C17.5,U3:23	S3(2.8)	0.021			1		1
chr1	174128500	174968299	840	1q25.1	0.502	AL022400.1,BANF1P4,GPR52,NDUFAF4P4,RABGAP1L,RABGAP1L-IT1,RNU6-307P,RP1-102G20.2,RP1-102G20.4,RP1-102G20.5,RP11-160H22.5,RP4-809F4.1,snoU13:196	S3(2.5)	0.121	1		1		2
chr1	245839780	246671500	832	1q44	1.251	CHCHD4P5,KIF26B,RNU6-1283P,RP11-36N20.1,RP11-83A16.1,SMYD3,SMYD3-IT1,Y_RNA:348	S2(3.6)	0.535	1	1	1		3
chr3	114035026	114866500	831	3q13.31	0.767	MIR4796,MIR568,RP11-197K3.1,YBX1P3,ZBTB20,ZBTB20-AS1,ZBTB20-AS2,ZBTB20-AS3,ZBTB20-AS4	S2(4.2)	0.31			1		1
chr20	8112500	8941500	829	20p12.3	0.349	AL031655.1,AL031655.2,PLCB1,PLCB1-IT1,RNU105B,RP5-859I17.2	S2(4.3)	0
chr3	187866500	188694542	828	3q27-28	1.943	AC022498.1,AC063932.1,LPP,LPP-AS1,LPP-AS2,MIR28,TPRG1,TPRG1-AS1	S1(4.7)	0.349			1		1
chr5	95296500	96120480	824	5q15	0.637	AC008592.7,AC020900.1,AC020900.2,CAST,CTC-506B8.1,CTD-2337A12.1,ELL2,ERAP1,FABP5P5,MIR583,PCSK1,RNU6-524P,RP11-254I22.1,RP11-254I22.2,RP11-254I22.3	S1(5.4)	0.217		2			2
chr14	68282500	69089500	807	14q24.1	0.138	CTD-2566J3.1,PPIAP6,RAD51B,RN7SL108P,RN7SL706P,RP11-204K16.1,ZFYVE26	S1(5.1)	1				1	1
chr11	78362500	79152500	790	11q14.1	0.145	AP002958.1,CTD-2337I7.1,MIR5579,MIR708,RP11-673F18.1,RP11-802F5.1,TENM4	S2(3.6)	0
chr3	29321500	30110500	789	3p24.1	3.889	AC092796.1,AC098650.1,AC099048.1,RBMS3,RBMS3-AS1,RBMS3-AS2,RBMS3-AS3,RPS12P5	S2(4)	0
chr10	78610500	79397500	787	10q22.3	0.615	KCNMA1,RNA5SP321,RP11-180I22.2,RP11-328K22.1,RP11-417C21.2,RP11-443A13.5,RP11-619F23.2	S1(5.1)	0.371				1	1
chr6	162370500	163149500	779	6q26	0.036	KRT8P44,PACRG,PARK2	G2(1.4)	0
chr3	41236500	42004500	768	3p22.1	0.209	AC099537.1,ATP6V0E1P2,CTNNB1,RN7SKP58,RPL36P20,SCARNA21:4,U8:21,ULK4,Y_RNA:521	S3(3)	0
chr4	81186500	81952118	766	4q21.21	1.922	C4orf22,FGF5,RP11-395C17.1	S2(4.2)	0
chr6	78554500	79316500	762	6q14.1	0.124	MEI4,RP3-390M24.1,SNORD112:40	S4(2)	0
chr4	151178500	151937500	759	4q31.3	0.254	AC110813.1,DCLK2,LRBA,MAB21L2,RNA5SP168,RP11-1336O20.2,RP11-174F8.1,ZBTB8OSP1	S2(4)	0
chr3	61546500	62304647	758	3p14.2	0.826	PTPRG,PTPRG-AS1,RNU2-10P,RP11-154D3.1,RPL10AP6,Y_RNA:524	S4(2.4)	0
chr15	60771359	61523500	752	15q22.2	0.268	CTD-2501E16.1,CTD-2501E16.2,RNA5SP397,RORA,RP11-219B17.1,RP11-219B17.2,RP11-39M21.1,RP11-39M21.2,RP11-554D20.1	S2(4)	0
chr3	65277500	66025500	748	3p14.1	2.656	AC104438.1,AC106827.1,AC106827.2,ILF2P1,MAGI1,MAGI1-AS1,MAGI1-IT1,RP11-88H12.2,RPL17P17,Y_RNA:525	S2(3.8)	0.402			1	1	2
chr13	67060500	67805500	745	13q21.32	0.058	PCDH9,PCDH9-AS2,PCDH9-AS3,PCDH9-AS4,RNU7-87P	S3(2.6)	0
chr5	102594500	103338500	744	5q21.1-2	0.684	AC010423.1,C5orf30,CTD-2154H6.1,CTD-2193G5.1,NUDT12	S2(3.9)	0
chr22	33577500	34316500	739	22q12.3	0.364	LARGE,LARGE-AS1,LARGE-IT1,MIR4764,SC22CB-1D7.1,SNORA76:3	S4(1.9)	0
chr8	140727500	141465500	738	8q24.3	0.145	C8orf17,RP11-284H18.1,TRAPPC9	S2(3.5)	1	1	1			2
chr13	35515500	36251500	736	13q13.3	0.253	AL390071.1,MAB21L1,NBEA,PHBP13,SCAND3P1	S3(2.7)	0.014		1			1
chr13	50655500	51391500	736	13q14.2-3	0.055	AL138696.1,DLEU1,DLEU2,DLEU7,DLEU7-AS1,RNA5SP28,RP11-175B12.2,RPL18P10,RPL34P26,ST13P4	S2(3.7)	0
chr17	58754813	59477256	722	17q23.2	0.291	AC005884.1,AC079005.1,AC111155.1,BCAS3,HMGN1P28,KRT18P61,RN7SL448P,RN7SL606P,RP11-136H19.1,RP11-264B14.1,RP11-264B14.2,RP11-332H18.3,RP11-332H18.4,RP11-332H18.5,Y_RNA:248,snoU13:142	S1(5.1)	0.12			1		1
chr2	63346677	64068500	722	2p15	0.246	AC016734.1,AC016734.2,AC074367.1,AC096664.1,AC096664.2,AC096664.3,HNRNPA1P66,MDH1,RPS4XP5,UGP2,WDPCP	S2(4)	0
chr6	20533500	21246500	713	6p22.3	0.427	CDKAL1,RNU6-150P,RP3-348I23.2,RP3-348I23.3	S3(2.8)	0.003		1			1
chr10	87415500	88126500	711	10q23.1-2	0.043	AL732479.1,GRID1,MIR346,RNA5SP322,RP11-93H12.3	S4(2.3)	0
chr10	34394500	35103500	709	10p11.21-22	0.711	PARD3,RP11-8L18.2,RP11-8L18.3,TCEB2P4,Y_RNA:25	S2(3.9)	0
chr22	28369500	29075853	706	22q12.1	0.83	RN7SL162P,RN7SL757P,SNORD42:1,TTC28,TTC28-AS1,Y_RNA:400	S1(4.7)	0
chr5	166999500	167699500	700	5q34	0.878	AC093304.1,CTB-178M22.1,CTB-178M22.2,CTB-77H17.1,CTB-78F1.1,CTB-78F1.2,CTC-353G13.1,SNORA40:14,TENM2	S3(3.2)	0
chr15	71407500	72097500	690	15q23	0.175	AC108861.1,CT62,NR2E3,RP11-592N21.1,RP11-592N21.2,RP11-673C5.1,RP11-673C5.2,THSD4	S1(5.2)	0
chr20	59828500	60517500	689	20q13.33	0.101	CDH4,RP11-429E11.2,RP11-429E11.3	S3(2.8)	0
chr4	183065500	183748500	683	4q34-35	1.125	AC108142.1,AC114798.1,MIR1305,RN7SKP67,RNU2-34P,RP11-18D7.2,RP11-18D7.3,RP11-402C9.1,TENM3	S3(3.3)	0
chr14	66974500	67656109	682	14q23.3	0.314	CTD-2560C21.1,GPHN,RP11-72M17.1,RP11-862P13.1	S2(3.7)	0
chr5	168051500	168728500	677	5q34-35	1.302	CTB-174D11.1,CTB-174D11.2,CTC-558O2.1,CTC-558O2.2,MIR218-2,MIR585,SLIT3,Y_RNA:578	S3(2.7)	0
chr12	77495500	78169562	674	12q21.2	0.237	AC073528.1,RP1-34H18.1,RP1-81P11.1,RP1-97G4.1,snoU13:57	S2(3.5)	0
chr11	91959500	92630500	671	11q14.3	0.193	FAT3,NDUFB11P1,PGAM1P9,RP11-203F8.1,RP11-675M1.2,RPS3AP42,snoU13:40	S3(2.6)	0
chr2	72382500	73053500	671	2p13.2	0.901	AC006461.2,EXOC6B,RNU2-39P,SNORD78:3	S2(3.7)	0
chr7	90225500	90893782	668	7q21.13	1.535	AC002456.2,CDK14,PTP4A1P3,TVP23CP1,snoU13:412	S2(3.8)	0
chr12	2161500	2823500	662	12p13.33	0.82	AC007618.3,CACNA1C,CACNA1C-AS1,CACNA1C-AS2,CACNA1C-AS3,CACNA1C-AS4,CACNA1C-IT3	S1(4.9)	0
chr11	70312500	70965500	653	11q13.3-4	0.045	AP001271.3,MIR3664,SHANK2,SHANK2-AS1,SHANK2-AS2,SHANK2-AS3,Y_RNA:66	S3(2.9)	0
chr1	33978343	34630500	652	1p34-35	0.799	CSMD2,HMGB4,HSPD1P14,RNA5SP42,RP5-1007G16.1	S3(3.4)	0.265	1				1
chr2	236402500	237053500	651	2q37.2	0.499	AC012305.1,AC064874.1,AGAP1,AGAP1-IT1,RN7SL204P,RNU7-127P,TMSB10P1	S3(2.6)	0
chr18	51107429	51751500	644	18q21.2	0.364	AC090666.1,MBD2,RP11-116K4.1,RP11-202D1.3,RPL29P32,SNORA37	S4(1.9)	0
chr4	86396500	87039064	643	4q21.23-3	1.291	AC098870.1,ARHGAP24,MAPK10,MIR4451,RP13-514E23.1,RP13-514E23.2	S2(3.6)	0
chr8	104512975	105155500	643	8q22.3	0.026	AP001572.1,RIMS2,RP11-1C8.4,RP11-5A11.1,RP11-5A11.2,RP11-771F20.1,snoU13:415	S3(3.1)	0
chr6	129203500	129846500	643	6q22.33	0.45	BMPR1APS1,LAMA2,MESTP1,RNU6-861P,RP1-69D17.3	S2(4.2)	0
chr3	70992500	71631500	639	3p13	1.405	FOXP1,FOXP1-AS1,FOXP1-IT1,MIR1284	S1(4.7)	0.591		1			1
chr18	36745500	37381500	636	18q12.2-3	0.104	LINC00669,MIR5583-1,RNU6-1242P,RPL7AP66	S4(1.6)	0
chr13	107879500	108513500	634	13q33.3	0.022	AL138710.1,FAM155A,FAM155A-IT1,MIR1267,SNORD31	S3(2.5)	0
chr14	30036500	30665500	629	14q12	0.933	AL356756.1,CTD-2251F13.1,CTD-2503I6.1,PRKD1,RNU6-1234P,RP11-269C4.1,RP11-269C4.2	S3(3.4)	0.475			1		1
chr6	1621500	2245500	624	6p25.3	0.25	GMDS	S2(3.5)	0
chr7	113718500	114342500	624	7q31.1	0.043	AC020606.1,AC073626.2,FOXP2,MIR3666,RNA5SP238,RP11-95P9.1	S4(2.2)	0
chrX	137667500	138287500	620	Xq26-27	0.179	FGF13,FGF13-AS1,MIR504,RP1-106C24.1,RP6-27P15.2	G2(1.4)	0
chr16	12070500	12681500	611	16p13.12-13	0.624	ACA64:2,CTD-3037G24.3,CTD-3037G24.4,RP11-165M1.2,RP11-165M1.3,RP11-166B2.7,RP11-276H1.2,RP11-276H1.3,RP11-552C15.1,RPS23P6,SNX29	S2(4.1)	0
chr17	63577500	64188500	611	17q24.1	0.376	CEP112,CTD-2535L24.2,GS1-531I17.2,GS1-531I17.3	S2(4.4)	0
chr8	18332500	18943500	611	8p22	3.581	AC090420.1,PSD3,RP11-1080G15.1,RP11-161I2.1,RP11-420B22.1,RP11-420B22.2,RPL35P6,SNORA62:7	S2(4.2)	0.286			1		1
chr4	53645500	54245500	600	4q12	1.95	FIP1L1,RASL11B,RNU6-310P,RP11-752D24.2,RP11-752D24.3,SCFD2,Y_RNA:535	S2(4.1)	0
chr3	17185500	17784500	599	3p24.3	0.547	AC090960.1,AC104451.2,AC140076.1,TBC1D5,U7:2	S3(2.7)	0
chr7	33168500	33765592	597	7p14.3	0.306	AC006195.2,AC007312.3,AC074338.5,BBS9,RNA5SP229	S2(3.9)	0
chr6	73328500	73922500	594	6q13	2.371	KCNQ5,KCNQ5-AS1,KCNQ5-IT1,KHDC1P1,KNOP1P4,MIR4282,PGAM1P10,RP11-257K9.3,RP11-257K9.8	S1(4.5)	0.77		1			1
chr1	66258500	66851500	593	1p31.3	1.294	PDE4B,RNU4-88P,RP11-397C12.1	S1(4.5)	0
chr12	79258500	79848500	590	12q21.2	0.14	AC078917.1,MIR1252,RP1-78O14.1,RP11-390N6.1,SYT1	S2(3.6)	0
chr15	39133500	39723500	590	15q14	0.127	C15orf54,RP11-265N7.1,RP11-265N7.2,RP11-462P6.1,RP11-624L4.1,RP11-62C7.2	S1(5.4)	0
chr4	113738500	114327500	589	4q25-26	0.157	AC004057.1,ANK2,RP11-119H12.4,RP11-119H12.5,RP11-119H12.6,RP11-650J17.1,RP11-650J17.2	S2(3.7)	0
chr3	142979500	143568500	589	3q24	0.035	GAPDHP47,RP11-501M7.1,RP13-635I23.3,SLC9A9,SLC9A9-AS1,SLC9A9-AS2,ST13P15	S3(2.6)	0
chr7	83534500	84122040	588	7q21.11	4.638	AC006322.1,SEMA3A	S1(4.5)	0.04		1			1
chr11	126287500	126875500	588	11q24.2	2.021	AP002833.1,KIRREL3,KIRREL3-AS1,KIRREL3-AS2,KIRREL3-AS3,MIR3167,RP11-115C10.1,RP11-688I9.2,RP11-688I9.4,ST3GAL4	S2(4.4)	0.288		2			2
chr2	18741500	19327500	586	2p24.1-2	0.169	AC092594.1,AC106053.1,NT5C1B,NT5C1B-RDH14,RDH14,RNU6-1215P	S2(4.4)	0
chr3	3925500	4509500	584	3p26.1-2	0.105	MRPS10P2,PNPT1P1,SETMAR,SUMF1	S4(1.6)	0
chr5	32689500	33273500	584	5p13.3	0.804	AC026703.1,AC026703.2,CTD-2017D15.1,CTD-2066L21.1,CTD-2066L21.2,CTD-2066L21.3,CTD-2218G20.1,CTD-2218G20.2,NPR3,RP11-113I22.1,RP11-36C20.1	S1(4.5)	0
chr8	118541500	119125500	584	8q24.11	6.048	EXT1,MED30	S1(5.4)	0
chr6	144605500	145188500	583	6q24.2	2.241	RP1-91J24.3,RP11-106E7.1,RP11-277I20.2,RP11-277I20.3,UTRN	S2(4.1)	0
chr3	109366953	109947500	581	3q13.13	0.071	RP11-424I3.1,RP11-457K10.1,RP11-457K10.2,RP11-696F10.1	S3(2.6)	0
chr6	44765500	45346500	581	6p21.1	0.237	MIR586,NUDT19P4,RP11-491H9.3,RUNX2,SUPT3H	S2(3.5)	0
chr1	231663500	232243500	580	1q42.2	0.204	DISC1,DISC1-IT1,LINC00582,RNU5A-5P,RP11-295G20.2,TSNAX,TSNAX-DISC1	S3(3.2)	0
chr1	171810500	172389873	579	1q24.3	0.127	C1orf105,DNM3,DNM3-IT1,DNM3OS,MIR199A2,MIR214,PIGC,RNU6-157P,SNORD112:23	S1(4.5)	0
chr13	43782500	44361044	579	13q14.11	0.196	ENOX1,ENOX1-AS1,ENOX1-AS2,RPL36P19	S2(4.1)	0
chr5	136259500	136834500	575	5q31.2	1.534	RNA5SP193,SPOCK1	S3(3)	0.004			1		1
chr2	27993500	28567500	574	2p23.2	0.435	AC093690.1,AC110084.1,BRE,MIR4263,MRPL33,RBKS,RP11-674I16.1,RP11-674I16.2,RP11-731I19.1	G1(5.5)	0
chr6	128267500	128841500	574	6q22.33	1.23	PTPRK,RP1-86D1.2,RP1-86D1.3,RP1-86D1.4,RP1-86D1.5,RP11-103C16.2	S2(3.8)	0
chr8	97657454	98222500	565	8q22.1	0.39	CPQ,KB-1958F4.1,KB-1958F4.2	S2(4.1)	0
chr12	44230500	44795500	565	12q12	0.464	RP11-46I1.1,RP11-46I1.2,RP11-624G19.1,TMEM117	S3(2.7)	0
chr4	7191500	7753500	562	4p16.1	0.112	MIR4274,MIR4798,PSAPL1,SORCS2	S2(4.1)	0
chr15	76638500	77198500	560	15q24.3	0.32	MIR3713,RN7SKP217,RP11-331H13.1,SCAPER	S2(4.1)	0
chr8	99400475	99958500	558	8q22.2	0.703	KB-1205A7.1,KB-1205A7.2,KB-1517D11.2,KB-1517D11.4,KCNS2,MRP63P7,OSR2,RN7SKP85,RNU6-748P,RP11-44N12.4,RP11-44N12.5,RPL19P14,STK3	S1(4.9)	0.04		1			1
chr1	245320500	245875500	555	1q44	0.052	AL359983.1,DNAJC19P8,KIF26B,RP11-522M21.2,RP11-522M21.3,RP11-62I21.1	S2(3.5)	0.784		2	1		3
chrX	11129261	11683500	554	Xp22.2	0.152	AC002366.3,AMELX,ARHGAP6,HCCS,MIR548AX,Y_RNA:787	S2(3.5)	0
chr6	152405500	152958500	553	6q25.1-2	1.043	ESR1,RNA5SP223,RP11-133I21.2,RP3-398G3.5,SYNE1,SYNE1-AS1	S3(3)	0
chr9	126139500	126692500	553	9q33.3	0.47	AL161790.1,CRB2,DENND1A,MIR601,PIGFP2,RP11-230L22.4,RP11-417B4.2,RP11-417B4.3	S2(3.8)	0.222		1			1
chr2	187867500	188420500	553	2q32.1	0.214	AC007319.1,AC018735.1,CALCRL,GAPDHP59,RN7SKP42,RNU6-989P,TFPI	S3(3.4)	0
chr2	45878500	46429500	551	2p21	0.602	AC017006.2,AC017006.3,AC017078.1,PRKCE,U51244.2	S1(5.1)	0
chr1	50893500	51444500	551	1p32.3	1.017	CDKN2C,FAF1,MRPS6P2,PHBP12,RNU6-1026P,RNU6-1253P,RP5-850O15.3,RP5-850O15.4,Y_RNA:361	S2(3.6)	0
chr9	3801500	4348392	547	9p24.2	1.288	GLIS3,GLIS3-AS1,RP11-252M18.3,RP11-358M14.2,RP11-70J12.1	S1(4.6)	0
chr11	132270500	132813500	543	11q25	0.759	OPCML,OPCML-IT2,RNU6-1182P	S3(3)	0
chr2	100156500	100698500	542	2q11.2	0.03	AFF3	S2(4.3)	0
chr12	1100500	1639056	539	12p13.33	1.354	ERC1,LINC00942,RN7SL852P,RP5-951N9.1,RP5-951N9.2	S1(5.3)	0.732		2			2
chr10	75981500	76519500	538	10q22.2	1.244	ADK,MRPL35P3,POLR3DP1,RAB5CP1,RP11-312P12.3,RP11-383B24.3,RP11-46O21.2,RPSAP6,TIMM9P1,Y_RNA:16	S1(4.8)	0
chr4	28374500	28911500	537	4p15.1	0.094	MESTP3,RN7SL101P,RP11-123O22.1,RP11-180C1.1	S4(2.2)	0
chr4	137695500	138232500	537	4q28.3	0.169	AC060835.1,RP11-138I17.1,RP11-785F11.1,SERF1AP1	S3(2.8)	0
chr6	155054500	155590500	536	6q25.2-3	1.016	AL121952.1,CLDN20,MIR1273C,RNU6-824P,RP11-477D19.2,RP3-472M2.2,SCAF8,TFB1M,TIAM2,U8:24	S1(5.1)	0
chr5	107182500	107717500	535	5q21.3	0.508	FBXL17	S3(2.5)	0
chr11	9781080	10315754	535	11p15.4	1.427	RNU7-28P,RP11-1H15.1,RP11-1H15.2,RP11-351I24.3,RP11-748C4.1,SBF2,SBF2-AS1	S1(5.4)	0
chr6	5260500	5794500	534	6p25.1	0.538	FARS2,HNRNPA1P37,LYRM4,RP1-182O16.1,RP1-232P20.1,RP1-256G22.2,RP3-520B18.1	S3(2.7)	0
chr1	41970500	42502500	532	1p34.2	0.16	AL451006.1,HIVEP3,RP11-486B10.3,RP11-486B10.4	S1(4.8)	0
chr18	33877676	34409068	531	18q12.2	0.569	FHOD3,SNORD112:20,TPGS2	S2(4.3)	0.372		1	1		2
chr10	128594500	129273500	529	10q26.2	0.787	DOCK1,FAM196A,RP11-223P11.2,RP11-223P11.3,Y_RNA:5	S3(2.5)	0
chr14	80882500	81408500	526	14q31.1	0.228	CEP128,DIO2-AS1,RP11-757H14.2	S2(3.6)	0
chr20	51587500	52112500	525	20q13.2	0.257	AL050316.1,AL354993.1,PPIAP10,RN7SKP184,RP11-15M15.1,RP11-15M15.2,RP4-669H2.1,RP4-678D15.1,RP5-823G15.5,TSHZ2	S3(3.1)	0
chr3	50707419	51231500	524	3p21.2	0.03	DOCK3,MIR4787,RP11-646D13.1,RP11-804H8.5,RP11-804H8.6,ST13P14,ZNF652P1	S3(3.4)	0
chr4	150292500	150816500	524	4q31.23	0.021	RP11-526A4.1,RP11-707F2.1,RP11-707F2.2	S2(3.5)	0
chr6	56298011	56820500	522	6p12.1	8.847	BEND6,DST,RNU6-626P,RP11-472M19.2,RPL17P26	S1(5)	1			2		2
chr7	81554500	82073500	519	7q21.11	0.654	AC005159.1,CACNA2D1,MIR1255B1	S2(3.8)	0.503				1	1
chr17	64297500	64815500	518	17q24.2	1.335	AC006947.1,MIR634,PRKCA,RN7SL735P,RNA5SP445,RNU6-928P,RP11-4F22.2	S1(4.9)	0
chr5	9029500	9545500	516	5p15.31	1.458	CTD-2201E9.1,CTD-2201E9.2,CTD-2201E9.4,CTD-2215L10.1,MIR4636,SEMA5A	S1(4.5)	0.45		1			1
chr21	17483500	17996500	513	21q21.1	0.155	AP000962.2,AP001172.2,AP001172.3,LINC00478,MIR125B2,MIR99A,MIRLET7C,RPS26P5,SNORD74:5	S3(2.8)	0
chr13	60229500	60739500	510	13q21.2	1.364	DIAPH3,DIAPH3-AS1,DIAPH3-AS2,RN7SL375P	S3(3)	0.172		1			1
chr7	18535500	19044500	509	7p21.1	0.283	AC004744.3,HDAC9,NPM1P13,RN7SKP266	S2(3.8)	0
chr7	122014500	122523500	509	7q31.32	0.021	CADPS2,RNF133,RNF148,RP11-395G17.1,RP5-1101C3.1,RP5-1166A24.1,RPS26P31	G2(1.4)	0
chr8	107282500	107789500	507	8q23.1	0.752	ABRA,OXR1,RNU7-84P,RP11-395G23.3,RP11-649G15.2,TAGLN2P1	S2(3.5)	0
chr8	106331500	106838797	507	8q23.1	1.29	RP11-127H5.1,RP11-152P17.1,RP11-152P17.2,RP11-642D21.1,RP11-642D21.2,ZFPM2	S2(3.6)	0
chr1	8380500	8886500	506	1p36.23	1.03	RERE,RP4-633I8.1,RP4-633I8.2,RP4-633I8.3,RP4-633I8.4,RP5-1115A15.1,RP5-1115A15.2,SLC45A1,SNORA77:3,Y_RNA:322,Y_RNA:366	G1(5.5)	0.465	1				1
chr19	30718500	31222500	504	19q12	0.328	AC005597.1,AC011478.1,CTC-565M22.1,ZNF536	S4(2)	0.005			1		1
chr5	15499500	16001500	502	5p15.1	0.947	CTD-2350J17.1,FBXL7,MIR887	S3(3)	0
chr6	16269500	16771500	502	6p22.3	1.504	AL034375.1,ATXN1,GMPR,RP1-151F17.1,RP1-151F17.2	S1(4.9)	0
chr7	119912500	120414500	502	7q31.31	0.28	KCND2,RNU6-581P,RP4-797C5.2	S4(2.3)	0
chr7	31610500	32111500	501	7p14.3	2.749	AC006377.1,CCDC129,PDE1C,PPP1R17,SNX2P2	S2(3.5)	0.225				1	1
chr5	92947500	93447500	500	5q15	0.753	FAM172A,MIR2277,NPM1P27,POU5F2,RP11-185E12.2,RP11-549J18.1	S3(3.4)	0
chrX	147582500	148081500	499	Xq28	0.082	AFF2,AFF2-IT1,RN7SKP267	G2(1.3)	0
chr9	16372500	16870500	498	9p22.2-3	0.683	BNC2,RP11-183I6.2,RP11-335H2.2,RP11-62F24.1,RP11-62F24.2	S1(4.9)	0
chr12	26489883	26986500	497	12p11-12	0.249	ITPR2,RNA5SP354,RP11-513G19.1,RP11-666F17.1,RP11-666F17.2	S1(4.5)	0
chr6	38111500	38607500	496	6p21.2	0.521	AL031905.1,BTBD9,BTBD9-AS1,RP1-319M7.2,SNORD45:4,Y_RNA:626,ZFAND3	S1(4.7)	0
chr2	33167500	33661390	494	2p22.3	1.498	AL133244.1,LTBP1,RNA5SP91,RNA5SP92,SNORD112:34,Y_RNA:462	S1(5.4)	0
chr4	78978500	79472672	494	4q21.21	0.051	AC093897.1,FRAS1,MINOS1P4,SERBP1P5	S2(3.8)	0
chr7	111352500	111846500	494	7q31.1	0.104	AC003080.4,DOCK4,DOCK4-AS1,RNA5SP237	S3(2.8)	0
chr14	32859500	33352500	493	14q12-13	0.105	AKAP6,RN7SL660P,RP11-320M16.1,RP11-320M16.2	S3(3.4)	0
chr7	137039229	137531838	493	7q33	1.957	AC009245.3,DGKI	S1(5)	0
chr8	49268500	49760500	492	8q11.21	0.121	AC026904.1,EFCAB1,RP11-567J20.1,RP11-567J20.2,RP11-567J20.3,RP11-770E5.1,RP11-770E5.2,RP11-770E5.3,RPL29P19	S1(5)	0
chr10	12390500	12881500	491	10p13	0.062	CAMK1D,MIR4480,MIR548Q,RNU6ATAC39P,SNORD45:1	S3(2.9)	0
chr14	33409500	33899500	490	14q13.1	0.024	NPAS3	S4(2.2)	0
chr11	26210500	26696500	486	11p14.2	0.123	ANO3,CTD-2507G9.1,MUC15,RP11-430L3.1,RP11-485O14.1,SLC5A12	S3(2.6)	0
chr9	112541500	113024500	483	9q31.3	2.108	AKAP2,C9orf152,PALM2,PALM2-AKAP2,RP11-151F5.2,TXN	S1(5.4)	0
chr1	225117500	225600403	483	1q42.12	0.166	DNAH14,LBR	S2(3.8)	0
chr4	72053002	72534500	481	4q13.3	1.68	LDHAL6EP,RP11-1J11.1,SLC4A4	S2(4)	0
chr5	93474500	93954500	480	5q15	0.127	AC093311.1,ANKRD32,CTC-303L1.1,CTC-303L1.2,KIAA0825,MTND5P12,MTND6P3,RP11-461G12.2	S3(2.8)	0.049			1		1
chr14	89607500	90086500	479	14q31-32	0.696	CAP2P1,FOXN3,FOXN3-AS1,FOXN3-AS2,RP11-33N16.2,RP11-33N16.3,RP11-356K23.1,RP11-356K23.2,Y_RNA:140	S2(4.4)	0.345			1		1
chr11	28702500	29181502	479	11p14.1	0.061	OR2BH1P,RP11-115J23.1,RP11-960D24.1	S1(4.9)	0
chr2	218142500	218621316	479	2q35	0.118	AC009492.1,AC010886.2,DIRC3	S1(4.9)	0
chr5	142152500	142631500	479	5q31.3	0.086	ARHGAP26,ARHGAP26-AS1,ARHGAP26-IT1	S1(5.3)	0
chr1	59761500	60238466	477	1p32.1	0.179	FGGY,MIR4711,RP4-782L23.2	S2(4.3)	0
chr4	20193500	20670500	477	4p15.31	1.263	MIR218-1,SLIT2,SLIT2-IT1	S2(3.6)	0
chr10	258500	735500	477	10p15.3	0.761	AL603831.1,DIP2C,MIR5699,PRR26,RN7SL754P,RNA5SP298,RP11-490E15.2,RP11-809C18.3,RP11-809C18.4,RP11-809C18.5,ZMYND11	S1(4.5)	0
chr2	15226500	15702500	476	2p24.3	1.153	NBAS,RP11-32P22.1	S4(2.2)	0
chr13	74233500	74709500	476	13q22.1	1.484	KLF12	S2(3.7)	0
chr17	61043500	61519500	476	17q23.2-3	1.705	AC015923.1,AC037445.1,CYB561,RP11-180P8.1,RP11-180P8.3,RP11-180P8.4,RP11-180P8.5,RP11-269G24.2,RP11-269G24.3,RP11-269G24.4,RP11-269G24.7,RP11-269G24.8,RP11-556O9.2,RP11-556O9.3,RP11-556O9.4,TANC2	S1(4.9)	0
chr5	112349500	112825500	476	5q22.2	0.197	CTD-2201G3.1,DCP2,MCC,TSSK1B	S1(4.5)	0
chr20	9012500	9486500	474	20p12.2-3	1.926	AL121898.1,PLCB4,RP5-1119D9.4	S2(4.2)	0
chr3	134517500	134989500	472	3q22.2	0.075	EPHB1	S3(2.7)	0
chr7	7679500	8151500	472	7p21.3	0.351	AC006042.7,AC006042.8,AC006465.4,AC007161.5,AC009473.1,GLCCI1,GS1-165B14.2,RNU6-534P,RPA3,RPA3-AS1,RPL23AP51	S3(3.1)	0.148		1			1
chr15	62682500	63153500	471	15q22.2	0.681	AC103740.1,MIR190A,RP11-1069G10.1,RP11-625H11.1,RP11-625H11.2,TLN2	S1(5.1)	0
chr6	127194500	127665500	471	6q22.33	0.23	ECHDC1,RNA5SP217,RNF146,RSPO3	S3(3.1)	0
chr1	185702500	186172500	470	1q25-31	0.308	GS1-174L6.4,HMCN1	S2(4)	0
chr22	47158500	47627500	469	22q13.31	0.509	TBC1D22A,Z97351.1	S2(4)	0
chr7	101460500	101928404	468	7q22.1	0.481	AC005086.1,AC005086.2,AC005086.3,AC005086.4,AC005088.1,CTA-339C12.1,CTA-357J21.1,CTB-181H17.1,CUX1,SNORA48:12	S2(4.4)	0
chr21	30565800	31031500	466	21q21.3	0.723	AP000240.9,BACH1,BACH1-AS1,BACH1-IT1,BACH1-IT2,BACH1-IT3,GAPDHP14,GRIK1,GRIK1-AS2,LINC00189,RP11-313P22.1,snoU13:217	S1(4.7)	0
chr18	72264500	72779500	465	18q22.3	0.755	LINC00909,ZNF407	S3(2.8)	0
chr9	15553500	16018500	465	9p22.3	0.07	CCDC171,HMGN2P16,RNU6-14P	S2(4.3)	0
chr9	18472500	18937500	465	9p22.1-2	7.94	ADAMTSL1,AL158150.1,FAM154A,MIR3152,RN7SKP258,RP11-503K16.2	S2(4.3)	0
chr13	100740500	101204500	464	13q32.3	0.563	GGACT,PCCA,PCCA-AS1,RP11-151A6.4,RP11-340C20.3,RPL15P18,RPS26P47	S3(3)	0
chr3	157824500	158288951	464	3q25.32	0.79	RP11-113A11.1,RP11-538P18.1,RP11-538P18.2,RSRC1	S2(3.5)	0
chr16	53737500	54200500	463	16q12.2	1.324	AC007347.1,FTO,FTO-IT1,RP11-357N13.1,RP11-357N13.2,RP11-357N13.3,RPGRIP1L	S3(2.6)	0
chr5	37378500	37840539	462	5p13.2	0.831	AC008869.1,GDNF,RNU6-1190P,RNU6-484P,RP11-648M2.2,WDR70	S1(4.8)	0
chr6	157099500	157611500	462	6q25.3	1.48	ARID1B,MIR4466,RP1-137K2.2,RP11-230C9.3,RP11-2J18.1	S2(3.8)	0
chr7	127291500	127750500	459	7q32.1	3.209	AC073934.6,LRRC4,MIR593,RP11-20L24.1,SND1	S2(4.1)	0
chr9	113342160	113800500	458	9q31.3	1.856	LPAR1,MUSK,RNU6-432P,RP11-410K21.2,RP13-461N9.2,Y_RNA:732	G1(5.5)	0
chr14	65799500	66256500	457	14q23.3	1.087	EIF1AXP2,FUT8,MIR4708,MIR625,RPL21P8	S2(3.8)	0
chr4	140619500	141076500	457	4q31.1	0.051	H3F3AP6,MAML3,MGST2,RN7SKP253,RP11-392B6.1	S2(4.3)	0
chr5	108083500	108540500	457	5q21.3	1.28	CTC-329H14.1,CTD-2197I11.1,FER,GJA1P1,RNU6-47P,RP11-47F1.1,Y_RNA:572	S3(3.2)	0
chr2	178483694	178940500	457	2q31.2	0.103	AC011998.1,AC011998.2,AC012499.1,API5P2,PDE11A,RNU6-629P	S3(3)	0
chr9	6757500	7214500	457	9p24.1	0.773	KDM4C,RP11-390F4.8,RP11-403H13.1	S3(3)	0
chr9	110802500	111258500	456	9q31.2	0.034	AL137019.1,CHCHD4P2,RP11-240E2.2,RP11-505C13.1	S2(3.6)	0
chr6	74779500	75233500	454	6q13	0.026	RP11-554D15.1,RP11-9G10.1	S2(4.1)	0
chr5	144761233	145215500	454	5q32	0.127	CTB-73N10.1,CTB-78O21.1,PRELID2	S3(3.2)	0
chr10	32733500	33186500	453	10p11.22	0.188	C10orf68,C1DP1,CCDC7,RP11-479G22.8	S1(4.7)	0
chr4	5053500	5506500	453	4p16.2	0.1	RN7SKP275,STK32B,Y_RNA:562	S2(3.5)	0
chr2	213565500	214017500	452	2q34	0.383	AC079610.1,AC093381.2,AC093865.1,AC108066.1,IKZF2,MIR4776-2,PCED1CP	S2(3.5)	0
chr7	131809500	132261500	452	7q32.3	0.024	AC011625.1,AC018643.4,PLXNA4	S4(2.4)	0
chr18	67068500	67520500	452	18q22.2	0.221	CD226,DOK6,RP11-465I4.2,RP11-465I4.3,RP11-543H23.2	S3(2.8)	0
chr17	70637500	71089500	452	17q24-25	0.287	AC080037.1,CTD-3010D24.3,RN7SKP180,RP11-171G2.1,RP11-766H1.1,SCARNA24:1,SLC39A11	S2(4.2)	0
chr5	169064250	169514500	450	5q35.1	0.153	CTB-37A13.1,DOCK2,FAM196B,MIR378E	S2(4.4)	0
chr8	48234500	48683500	449	8q11.21	0.517	CEBPD,RNU6-665P,RP11-697N18.1,RP11-697N18.2,RP11-697N18.3,RP11-697N18.4,SPIDR	S2(3.8)	0
chr4	175900532	176348500	448	4q34.1-2	0.041	RP11-287F9.1,RP11-287F9.2,RP11-391J13.1	S4(1.8)	0
chr12	83080500	83528500	448	12q21.31	0.077	RNU6-977P,TMTC2	G2(1.4)	0
chr4	95679118	96125500	446	4q22.3	0.159	BMPR1B,UNC5C	S3(3.4)	0
chr21	29600986	30047170	446	21q21.3	0.676	AF131217.1,LINC00161	S2(4.3)	0
chr5	170288500	170732500	444	5q35.1	0.187	CTC-455F18.3,RANBP17,RN7SL623P,RP11-546B8.3,snoU13:334	S3(3.2)	0
chr3	23243500	23687500	444	3p24.3	0.815	AC092038.1,AC092038.2,AC121251.1,RNU6-788P,RNU6-922P,UBE2E2,UBE2E2-AS1,Y_RNA:490	S2(4.2)	0
chr14	53635771	54078500	443	14q22.1	0.065	AL163953.2,AL163953.3	S2(4.3)	0
chr1	57448500	57891500	443	1p32.2	0.215	DAB1,RP5-1103B4.3,RP6-102O10.1	S3(2.6)	0
chr2	44588500	45029500	441	2p21	0.236	AC067957.1,CAMKMT,PREPL	S3(3.2)	0
chr16	72259043	72699500	440	16q22.2	0.089	AC004158.2,AC004158.3,AC092289.1,RNU6-385P,RP11-328J14.2,RP5-991G20.1	S3(3)	0
chr8	102697500	103136500	439	8q22.3	0.255	KB-1107E3.1,NCALD,snoU13:419	S3(3)	0
chr12	78224684	78663500	439	12q21.2	3.438	NAV3,RP11-136F16.1,RP11-136F16.2	S3(3.2)	0.44		2			2
chr12	46931284	47369500	438	12q13.11	0.085	OR7A19P,RP11-446N19.1,RP11-66E20.2,SLC38A4	S1(5.1)	0
chr17	55333500	55770500	437	17q22	0.232	MSI2,RN7SL437P,RN7SL449P,RNU7-134P,RP11-118E18.2,RP11-118E18.4	S2(4.2)	0
chr8	119197500	119634500	437	8q24.11-12	0.127	AC023590.1,SAMD12	G1(5.5)	0
chr11	26843500	27278500	435	11p14.1-2	0.092	BBOX1,FIBIN,RP11-1L12.3	S2(3.9)	0
chr5	130698500	131133500	435	5q31.1	1.619	CDC42SE2,CTC-432M15.3,FNIP1,RAPGEF6	S2(4)	0
chr11	131780500	132215500	435	11q25	0.568	NTM,NTM-IT,RP11-697E14.2	S2(4.3)	0
chr3	78637500	79069500	432	3p12.3	0.488	RN7SL751P,ROBO1,RP11-588D3.1	S3(2.6)	0
chr5	53176881	53606500	430	5q11.2	0.376	ARL15,MIR4459,MIR581,RN7SL801P,RNU6-272P	S2(4.2)	0
chr14	71787500	72217500	430	14q24.2	2.688	RN7SL683P,RP1-261D10.1,RP1-261D10.2,SIPA1L1,SNORD56B	S1(4.6)	0
chr1	62208500	62636500	428	1p31.3	0.194	INADL,LAMTOR5P1,MIR3116-1,RN7SL180P,RNU6-1177P,RNU6-414P	S3(2.7)	0
chr18	46559500	46986500	427	18q21.1	0.98	DYM,MIR4744,RP11-110H1.9,RP11-15F12.1,RP11-15F12.3,RP11-30L3.2	S1(5.1)	0
chr8	131029375	131456500	427	8q24.21	5.306	AC131568.1,ASAP1,RNU6-1255P,SNORA12:3	S1(5.1)	0
chr17	78517500	78943500	426	17q25.3	0.7	CTD-2561B21.3,CTD-2561B21.4,CTD-2561B21.5,RP11-28G8.1,RPL31P7,RPTOR	S1(5.1)	0
chr3	136045500	136471500	426	3q22.3	1.83	HMGN1P10,PCCB,RNU6-1284P,RNU6-789P,RNU7-198P,RNY4P4,RP11-102M11.1,RP11-102M11.2,STAG1	S1(4.7)	0
chr1	39546987	39972500	426	1p34.3	2.013	BMP8A,KIAA0754,MACF1,RNA5SP44,RNU6-608P,RP11-416A14.1,RP11-420K8.1,RP11-420K8.2	S1(5.3)	0
chr2	197041227	197467500	426	2q32-33	1.707	AC020571.3,HECW2,RN7SL820P,snoU13:263	S1(4.9)	0.478				1	1
chr14	76126500	76551500	425	14q24.3	0.409	C14orf1,FLVCR2,IFT43,RP11-270M14.1,RP11-270M14.4,RP11-270M14.5,RP11-98L12.2,TGFB3,TTLL5	S2(3.9)	0
chr6	140756500	141181500	425	6q24.1	0.039	AL356137.1,MIR4465,RP3-460G2.2,RPS3AP24	S2(4.2)	0
chr12	101110500	101534500	424	12q23.1	0.257	ANO4,RP11-263E1.1,RP11-350G24.1,RP11-350G24.2	S3(2.9)	0
chr7	130790500	131214500	424	7q32.3	1.093	AC008264.4,AC009362.2,MKLN1,MKLN1-AS1,MKLN1-AS2,PODXL,RP11-180C16.1	S1(5.4)	0.934		1			1
chr7	1848500	2272878	424	7p22.3	0.286	AC110781.3,MAD1L1,MIR4655	S1(4.5)	0
chr4	16478500	16901500	423	4p15.32	1.024	LDB2,RP11-446J8.1	S2(4)	0
chr9	101048500	101470500	422	9q22.33	0.221	GABBR2,SEPT7P7	S1(5)	0.738		1			1
chr7	28449500	28870500	421	7p14-15	0.177	AC005105.2,CREB5	S3(3.4)	0
chr1	64240500	64661500	421	1p31.3	1.25	CFL1P3,RNU6-809P,ROR1,RP11-24J23.2,RP4-597J3.1,Y_RNA:363	S2(4.4)	0
chrX	67234743	67654500	420	Xq12	0.491	OPHN1,RNU6-1225P,RP11-516A11.1,RP11-516A11.3,Y_RNA:779	S3(3)	0
chr3	67286500	67705500	419	3p14.1	0.968	NDUFB4P1,RP11-81N13.1,RP11-85I21.1,SUCLG2	S4(2.4)	0
chr5	158109500	158528500	419	5q33.3	1.505	CTD-2363C16.1,CTD-2363C16.2,EBF1,RP11-175K6.1	S3(3)	0
chr11	95658479	96076344	418	11q21	2.032	MAML2,MIR1260B,RP11-697H10.1	S1(5.4)	0
chr12	72666500	73082500	416	12q21.1	0.11	CHCHD3P2,RP11-98E6.1,TRHDE,TRHDE-AS1	S3(2.5)	0
chr12	28342500	28757500	415	12p11.22	0.74	CCDC91,RNA5SP355,RNU4-54P,RP11-874G11.1,RP11-967K21.1	S3(3.3)	0
chr18	34409068	34823738	415	18q12.2	0.248	CELF4,KIAA1328,RP11-58G13.1,RP11-95O2.1,TPGS2	S3(3)	0
chrX	41369500	41783500	414	Xp11.4	0.752	CASK,CASK-AS1,GPR34,GPR82,RN7SL144P,RN7SL406P,RNU6-1321P,RNU6-202P,RP11-204C16.4,RP5-1174J21.1,RP5-1174J21.2	S2(3.5)	0
chr2	43410500	43824500	414	2p21	0.757	AC010883.5,RNU6-958P,THADA,ZFP36L2	S1(5.2)	0
chr10	60272500	60686500	414	10q21.1	1.905	BICC1,FAM133CP,RN7SKP196	S2(4.3)	0
chr1	240255500	240669500	414	1q43	8.037	ADH5P3,AL646016.1,FMN2,GREM2,RP11-177F11.1,RP11-567G24.1,RP11-567G24.3,Y_RNA:307,Y_RNA:347	S1(5)	0
chr4	40802500	41216500	414	4p13-14	1.668	APBB2,NSUN7,RNA5SP160,RNU6-1195P,RNU6-836P,RP11-632F7.3,Y_RNA:560,snoU13:326	S2(4.3)	0
chr5	14140500	14552500	412	5p15.2	8.651	TRIO	S1(5.2)	0
chr12	64237500	64648500	411	12q14.2	2.855	C12orf66,RNU5A-7P,RNU6-1009P,RP11-1029F8.1,RP11-196H14.2,RP11-196H14.3,RP11-196H14.4,RP11-274J7.2,RP11-274J7.3,RPL36AP41,RPS11P6,SRGAP1	S1(5.3)	0
chr3	170770500	171178500	408	3q26.2-31	0.195	MIR569,TNIK,Y_RNA:485	S1(4.8)	0
chr10	127670500	128077024	407	10q26.2	4.316	ADAM12,FANK1,RNA5SP328,RP11-81B10.2	S2(4.2)	0.834	1	1	1		3
chr10	18429500	18836500	407	10p12.31-33	0.119	CACNB2,NSUN6,RP11-109I13.2,RP11-383B4.4,RP11-499P20.2	S3(2.9)	0
chr14	61189500	61596500	407	14q23.1	0.938	MNAT1,RNU6-398P,RP11-193F5.1,RP11-193F5.4,RP11-307P22.1,SIX4,SLC38A6,SRMP2,TRMT5	S1(5.1)	0
chr4	123844228	124249500	405	4q28.1	0.788	AC109357.1,CTB-51E13.1,SPATA5	S2(4.4)	0
chr13	42130500	42535500	405	13q14.11	0.555	KARSP1,MIR5006,RN7SL515P,RNU6-74P,VWA8	S1(5)	0
chr18	42259500	42664500	405	18q12.3	0.432	MIR4319,RP11-456K23.1,SETBP1	S3(2.7)	0
chr2	144686500	145090135	404	2q22.3	0.326	AC016910.1,GTDC1	S2(3.9)	0
chrX	6662500	7066500	404	Xp22.31	0.194	HDHD1,MIR4767,RP11-483M24.2,RP13-926M18.1	S4(2.2)	0
chr6	147124960	147528500	404	6q24.3	0.132	ADGB,RP11-497D6.3,RP11-497D6.5,RP3-337D23.3,STXBP5,STXBP5-AS1	S2(4.3)	0
chr9	17134500	17535500	401	9p22.2	0.414	CNTLN,RP11-492A12.2	S2(3.7)	0
chr3	9005457	9405500	400	3p25.3	0.034	PGAM1P4,RP11-380O24.1,SETD5-AS1,SRGAP3,SRGAP3-AS1,SRGAP3-AS2,SRGAP3-AS3,SRGAP3-AS4,THUMPD3	S2(4.4)	0
chr7	144133500	144533500	400	7q35	0.035	EEF1A1P10,RNU6ATAC40P,TPK1	G2(1.3)	0
chr6	37787500	38187500	400	6p21.2	3.128	BTBD9,RN7SL285P,RNU1-87P,RP11-420A21.1,SNORD45:4,ZFAND3	S1(4.7)	0.005		1			1
chr1	72748500	73148500	400	1p31.1	0.053	RPL31P12	S3(2.7)	0.462	1				1
chr8	128806500	129206500	400	8q24.21	1.819	MIR1205,MIR1207,MIR1208,PVT1,RNU1-106P,RNU4-25P,TMEM75	S1(5.2)	0
chr9	20658500	21057500	399	9p21.3	0.914	FOCAD,MIR491,PTPLAD2,RP11-4E23.2,SNORA30:3	S2(3.6)	0
chr3	74267500	74664500	397	3p12.3	1.515	AC128653.1,CNTN3	S3(2.7)	0
chr4	13090500	13486500	396	4p15.33	0.257	HSP90AB2P,RAB28	S4(2.3)	0
chr13	39782500	40177500	395	13q13-14	0.679	LHFP,snoU13:70	S3(2.8)	0
chr12	105710500	106105500	395	12q23.3	1.829	AC011313.1,C12orf75,RP11-266E14.1,RP11-474B16.1	S1(5)	0
chr1	61542500	61936500	394	1p31.3	0.664	AC096534.1,NFIA,RP4-802A10.1,RP5-833A20.1	S3(2.5)	0
chr10	116188500	116582500	394	10q25.3	0.076	ABLIM1,FAM160B1,PPIAP19,RP11-106M7.1,RP11-317F20.2,TAF9BP2,snoU13:5	S1(4.6)	0
chr3	81417172	81811500	394	3p12.2	3.584	GBE1,RNU2-28P,RP11-142L1.3,SETP6	S3(2.6)	0
chr19	43264500	43657430	393	19q13.2-31	0.081	AC004603.4,CEACAMP6,CEACAMP7,CEACAMP8,CEACAMP9,PSG1,PSG10P,PSG11,PSG2,PSG6,PSG7,PSG8	G1(5.7)	0
chrX	10408500	10851773	393	Xp22.2	0.298	MID1,RNU6-800P	S2(4.3)	0
chr3	24144500	24536500	392	3p24.2	0.626	LINC00691,RPL31P20,THRB,THRB-AS1,THRB-IT1	S2(3.5)	0
chr4	148652500	149042500	390	4q31.23	1.811	ARHGAP10,MIR4799,NR3C2,RN7SL254P,RNA5SP165,RP11-315D13.1	S1(4.7)	0
chr18	54317500	54707500	390	18q21.31	0.593	RP11-383D22.1,TXNL1,U3:22,WDR7,WDR7-UT1,Y_RNA:272	S3(3.2)	0
chr3	171757500	172147500	390	3q26.31	4.962	AC092964.1,AC092964.2,BZW1P1,FNDC3B,RN7SL141P,RP11-423E7.1	S1(4.6)	0.319			1		1
chr2	232825500	233215500	390	2q37.1	0.748	AC068134.10,AC105461.1,DIS3L2,ECEL1P3,MIR562	S2(3.8)	0
chr1	21113816	21503500	390	1p36.12	2.253	AL031005.1,EIF4G3,MIR1256,RNU7-200P,RP11-487E1.2,RP11-628K18.1,RPS15AP6	S1(5.3)	0
chr7	76581500	76970500	389	7q11.23	0.057	AC005522.7,AC007000.10,AC007000.11,AC007000.12,AC073635.5,AC114737.3,CCDC146,DTX2P1,DTX2P1-UPK3BP1-PMS2P11,FAM185BP,FDPSP7,FGL2,GSAP,PMS2P11,PMS2P9,RP11-467H10.1,RP11-467H10.2,SPDYE9P,UPK3B,UPK3BP1,Y_RNA:670,Y_RNA:671	S1(5)	0
chr9	97487500	97875989	388	9q22.32	3.217	C9orf3,FANCC,MIR2278,MIR23B,MIR27B,MIR3074,RP11-49O14.2,RP11-49O14.3,RP11-54O15.3	S1(5.2)	0
chr1	176432306	176820500	388	1q25.2	0.114	PAPPA2,PTP4A1P7	S4(1.6)	0
chr2	19158500	19546509	388	2p24.1-2	0.085	AC092594.1	S1(4.5)	0
chr1	178062500	178449741	387	1q25.2	2.492	RASAL2,RASAL2-AS1,RP11-21M7.2,RP4-765C7.2	S1(5)	0
chr2	198669500	199056500	387	2q33.1	0.488	AC109589.1,PLCL1:1	S3(2.5)	0
chr17	30818500	31204500	386	17q11.2	0.623	AC084809.2,MYO1D,RP11-220C2.1,RP11-466A19.1,RP11-466A19.3,RP11-466A19.5,RP11-466A19.6,RP11-466A19.8,Y_RNA:241	S2(3.7)	0
chr8	116295500	116681500	386	8q23.3	2.254	AF178030.2,TRPS1	S3(2.8)	0
chr14	64320500	64705500	385	14q23.2	0.074	ESR2,MIR548H1,SYNE2	S2(4.4)	0
chr5	61601500	61985500	384	5q12.1	0.771	CKS1B:2,DIMT1,IPO11,KIF2A,LRRC70,RNU6-661P,RP11-95I19.1,RP11-95I19.2	S4(2.4)	0
chr6	100946500	101329500	383	6q16.3	1.999	ASCC3,RP1-121G13.3,RP3-467N11.1	S2(3.6)	0.583		1			1
chr11	102979500	103362500	383	11q22.3	0.465	DYNC2H1,MTND1P36,MTND2P26,RP11-37O16.3,RP11-37O16.4,RP11-37O16.6,RP11-37O16.7,RP11-37O16.8	S1(4.5)	0.03		1			1
chr15	57210500	57592562	382	15q21.3	2.36	AC010999.1,HNRNPA3P11,TCF12,ZNF280D,snoU13:97	S1(4.6)	0
chr15	85923500	86305500	382	15q25.3	2.076	AKAP13,CTD-2262B20.1,KLHL25,RNU6-1280P,RNU7-79P,RP11-158M2.2,RP11-158M2.3,RP11-158M2.4,RP11-158M2.5,RP11-815J21.1,RP11-815J21.2,RP11-815J21.3,RP11-815J21.4	S1(4.9)	0.677		1			1
chr2	109742500	110265500	381	2q12-13	0.243	MIR4265,MIR4266,SH3RF3,SH3RF3-AS1,SNRPGP9	S1(5.1)	0
chr7	27839500	28220500	381	7p15.1-2	0.797	JAZF1,JAZF1-AS1,RN7SL365P,RNU6-979P,TAX1BP1	S2(4.3)	0
chr4	114302500	114683083	381	4q26	5.597	ANK2,CAMK2D,RN7SL184P,RNU1-138P	S1(4.8)	0
chr13	101686500	102067500	381	13q32-33	0.092	NALCN,NALCN-AS1	S2(4)	0
chr10	13670500	14051500	381	10p13	0.311	AL157392.1,FRMD4A,PRPF18,RNA5SP301,RP11-142M10.2,RP11-295P9.12,RP11-295P9.3,RP11-295P9.6,RP11-295P9.8,RP11-308K19.2,RP11-353M9.1	S1(5.2)	0
chr18	46063500	46444500	381	18q21.1	1.669	CTIF,MIR4743,RP11-426J5.2,RP11-484L8.1	G1(5.5)	0
chr14	32029500	32410500	381	14q12	0.203	CTD-2213F21.3,NUBPL,RNU6-455P,RNU6-602P,RP11-159D23.2	S2(3.6)	0
chr14	37261500	37641500	380	14q13.3	0.025	MIR4503,RP11-537P22.2,RP11-81F13.1,RP11-81F13.2,SLC25A21,SLC25A21-AS1	S3(2.8)	0
chr8	9911500	10291181	380	8p23.1	0.25	AC023385.1,MSRA,RP11-1E4.1,RP11-212F11.1	S4(2.3)	0
chr5	141704500	142083346	379	5q31.3	0.149	AC005215.1,AC005370.1,AC005592.2,FGF1,RPS12P10,SPRY4	G1(5.5)	0
chr6	148512500	148891500	379	6q24.3	2.28	AL033378.1,CYP51P3,RNU6-1222P,RP11-631F7.1,SASH1,SNRPEP6	S1(5.1)	0
chr1	210510500	210887500	377	1q32.2	0.048	HHAT,KCNH1,RNU5A-8P,RP5-879K22.1	S2(3.7)	0
chr16	17188784	17565500	377	16p12.3	2.584	CTD-2576D5.2,CTD-2576D5.4,XYLT1	S3(3.2)	0
chr1	243636500	244013500	377	1q43-44	1.791	AKT3,AKT3-IT1,FABP7P1,RP11-269F20.1,RP11-370K11.1,SDCCAG8	S2(4.3)	0
chr10	114206500	114583248	377	10q25.2	0.74	MIR4295,RP11-214N15.5,RP11-25C19.3,VTI1A,ZDHHC6	S2(3.9)	0
chr21	28840500	29216500	376	21q21.3	0.028	AP001607.1,LINC00113,NCSTNP1	S2(3.7)	0
chrX	62406500	62781500	375	Xq11.1	0.236	CBX1P1,RP11-357C3.3,SPIN4,SPIN4-AS1	S4(1.9)	0
chr5	64404500	64777747	373	5q12.3	2.797	ADAMTS6,CTD-2194F4.2,CTD-2375G15.1,RPEP1,Y_RNA:587	S1(5.4)	0.123		1			1
chr2	229763500	230136500	373	2q36.3	0.396	AC007677.2,PID1,RN7SKP283	S3(2.6)	0
chr6	89301500	89674500	373	6q15	0.908	AL079342.1,RNGTT,SNORA73:6	S4(2.3)	0
chr18	52885500	53258500	373	18q21.2	1.834	MIR4529,RP11-619L19.1,RP11-619L19.2,TCF4	S2(3.8)	0
chrX	64254500	64627963	373	Xq11-12	0.092	AL445523.1,CCT4P2,MORF4L1P5,RP11-151G12.2,RP11-231N9.1,ZC4H2	S4(1.9)	0
chr12	40127500	40499500	372	12q12	0.241	AC121336.1,C12orf40,RPL30P13,SLC2A13,SNORA22:1	S4(1.5)	0
chr7	106833745	107204959	371	7q22.3	0.833	AC004492.1,COG5,CTB-20D2.1,DUS4L,GPR22,HBP1	S2(4)	0
chrX	128286500	128657500	371	Xq25	0.369	RNA5SP513,RPS26P56,SMARCA1	S3(3.4)	0
chr10	64910500	65281500	371	10q21.3	2.115	JMJD1C,JMJD1C-AS1,MIR1296,NRBF2,PRELID1P3,REEP3,RP11-351O1.3,RP11-351O1.4,TATDN1P1	S2(3.8)	0
chr5	33522335	33893500	371	5p13.2-3	0.399	ADAMTS12,RNU6-923P	S1(4.9)	0
chr4	77355500	77726500	371	4q21.1	0.944	AC107072.2,AC112249.1,MIR4450,MIR548AH,RNU6-145P,RP11-359D14.2,RP11-359D14.3,RP11-688H10.1,SHROOM3	G1(5.5)	0
chr1	187042500	187412737	370	1q31.1	0.092	LINC01036	S4(2.1)	0
chr2	40310500	40679500	369	2p22.1	3.118	AC007377.1,SLC8A1,SLC8A1-AS1	S2(4.4)	0
chr13	36336500	36705500	369	13q13.3	0.042	DCLK1	S3(3.4)	0
chr2	177311500	177680500	369	2q31.1	0.069	AC017048.1,AC017048.2,AC017048.3,AC017048.4,AC092162.1,AC092162.2,FUCA1P1,RNU6ATAC14P,RP11-324L17.1	S3(2.6)	0
chr4	121475500	121844500	369	4q27	0.333	PRDM5,RNU6-550P,RP11-501E14.1,SETP12	S4(2.2)	0
chr2	54197500	54565500	368	2p16.2	0.241	AC008280.1,AC008280.3,ACYP2,C2orf73,HMGB1P31,PSME4,RNU7-172P,RP11-477N3.1,TSPYL6	S1(4.9)	0
chr14	37666500	38033251	367	14q13-21	0.167	MIPOL1,RNU6-886P,RP11-356O9.2	S3(2.9)	0.809				1	1
chrX	19539500	19905719	366	Xp22.12	0.823	SH3KBP1	S2(3.8)	0
chr8	141645718	142011500	366	8q24.3	3.143	MIR151A,PTK2,RNA5SP278	G1(5.5)	0.982		1			1
chr2	239958500	240322500	364	2q37.3	0.27	AC017028.1,AC017028.10,AC017028.2,AC017028.3,AC017028.4,AC017028.5,AC017028.6,AC017028.7,AC017028.8,AC017028.9,HDAC4,MIR2467,MIR4269,MIR4440,MIR4441	S2(3.6)	0.394				1	1
chr5	115420500	115783242	363	5q23.1	0.423	AC010296.1,COMMD10,CTC-339F2.2,CTD-2287O16.5,HMGN2P27,RNU6-644P,SEMA6A	S3(2.9)	0
chr2	135926500	136289500	363	2q21.3	0.167	AC064850.4,R3HDM1,RAB3GAP1,ZRANB3	S3(3.3)	0
chr5	80683500	81046500	363	5q14.1	0.793	ACOT12,SSBP2	S2(4.1)	0
chr6	149068500	149431500	363	6q25.1	0.971	RP11-162J8.2,RP11-162J8.3,UST	S1(4.6)	0
chr15	35837500	36200500	363	15q14	0.039	DPH6,DPH6-AS1,RP11-702M1.2	S2(3.7)	0
chr3	99536677	99898410	362	3q12.1	0.397	CMSS1,FILIP1L,MIR3921	S1(5.3)	0
chrX	17393500	17755587	362	Xp22.13	0.256	MIR4768,NHS,NHS-AS1,RP1-60N8.1,RP3-389A20.5	S3(2.5)	0
chr8	88978500	89340500	362	8q21.3	0.386	CTB-118P15.2,MMP16,RP11-586K2.1	S4(2.3)	0
chr12	10962500	11324500	362	12p13.2	0.719	AC018630.1,PRH1,PRH2,PRR4,RNU6-676P,RP11-144O23.8,RP11-673D15.7,RP11-785H5.1,RP11-785H5.2,TAS2R10,TAS2R12,TAS2R13,TAS2R14,TAS2R15,TAS2R18,TAS2R19,TAS2R20,TAS2R30,TAS2R31,TAS2R43,TAS2R46,TAS2R50,TAS2R63P,TAS2R64P,TAS2R9	S3(2.9)	0
chr2	148778500	149139500	361	2q23.1	0.845	AC019070.1,MBD5,ORC4,SNORA48:8	S4(1.7)	0.622		1			1
chr3	150835500	151196500	361	3q25.1	0.031	AC078816.1,GPR171,GPR87,IGSF10,MED12L,MRPL42P6,P2RY12,P2RY13,P2RY14,RNA5SP145,SETP11	S2(3.9)	0
chr3	4533500	4893500	360	3p26.1	0.048	AC018816.3,EGOT,ITPR1,ITPR1-AS1	S3(3.4)	0
chr4	89619386	89979500	360	4q22.1	0.228	FAM13A,FAM13A-AS1,HERC3	S2(4.3)	0.061			1		1
chr10	54170894	54529500	359	10q21.1	0.135	MBL2,PRKRIRP3,RP11-346D6.6,RP11-556E13.1	S1(4.6)	0
chr3	56752500	57111500	359	3p14.3	0.106	ARHGEF3,ARHGEF3-AS1,SPATA12	S3(3.3)	0
chr13	38568857	38925500	357	13q13.3	0.102	LINC00571,UFM1	S3(2.5)	0
chr10	95753500	96108500	355	10q23.33	0.363	HDAC1P1,NOC3L,PLCE1,PLCE1-AS1,RNU6-657P,RNY4P26,RP11-162K11.4,RP11-391J2.3,RP11-429H9.4,RP11-76P2.4	S1(4.7)	0
chr1	215129500	215484500	355	1q41	4.532	KCNK2	S1(4.8)	0
chr8	72756500	73110500	354	8q13.3	0.248	MSC,RP11-142A23.1,RP11-383H13.1,RPS20P20,TRPA1	S2(3.8)	0
chr8	59679500	60033500	354	8q12.1	2.54	RNU4-50P,RP11-25K19.1,RP11-328K2.1,TOX	S2(4.4)	0
chr4	41362500	41715500	353	4p13	0.469	LIMCH1,RP11-124A7.1,RP11-227F19.5	S2(4)	0
chr3	115502500	115855500	353	3q13.31	0.054	LSAMP,RN7SL815P	S2(3.5)	0.74			1	1	2
chr1	107682500	108034500	352	1p13.3	0.737	AC114491.1,NTNG1	G2(1.4)	0
chr10	89991500	90343500	352	10q23.31	0.087	RNLS	S1(4.6)	0
chr6	136171500	136522500	351	6q23.3	0.164	AL360178.1,AL512290.1,COX5BP2,PDE7B,RP13-143G15.3,RP13-143G15.4	S2(4.2)	0
chr20	13269500	13620500	351	20p12.1	0.349	GAPDHP2,ISM1,TASP1	S4(2.4)	0
chr13	102104500	102454227	350	13q33.1	8.86	FGF14,ITGBL1,RNU1-24P,RP11-397O8.7	S2(3.9)	0
chr5	134349500	134699500	350	5q31.1	0.052	CTC-276P9.1,CTC-276P9.2,CTC-276P9.3,CTC-349C3.1,CTC-349C3.2,H2AFY,PITX1	S1(5.3)	0
chr6	8434500	8784410	350	6p24.3	0.074	HULC,SLC35B3	S4(1.8)	0.817			1		1
chr22	48885500	49234500	349	22q13.32	0.282	AL954742.1,CTA-299D3.8,FAM19A5,MIR4535	S4(2.1)	0
chr11	72504726	72853500	349	11q13.4	1.164	AP002381.2,ATG16L2,FCHSD2,RNU6-672P	S1(5.3)	0
chr12	16499500	16846733	347	12p12.3	0.396	AC007528.1,LMO3,MGST1,RP11-424M22.1,RP11-424M22.3,RP11-473N11.2	S4(2.2)	0
chr6	25279500	25626500	347	6p22.2	0.434	AL160037.1,LRRC16A,RNU6-987P,Y_RNA:641,snoU13:366	S3(2.5)	0
chr10	24497500	24843500	346	10p12.1-2	0.226	AL353583.1,KIAA1217,MIR603	S2(3.8)	0
chr2	62932500	63277191	345	2p15	2.568	AC007098.1,AC009501.4,EHBP1,RP11-443F16.1,Y_RNA:466	S2(3.8)	0
chr3	31677500	32022500	345	3p23	0.064	OSBPL10,OSBPL10-AS1,STT3B,ZNF587P1	S3(2.7)	0
chr12	116371500	116715500	344	12q24.21	4.33	AC060226.1,MED13L,MIR620,RNU6-1188P,RP11-115H15.1,RP11-115H15.2,RP11-493P1.2	S2(4.4)	0
chr9	80302500	80646500	344	9q21.2	1.597	GNAQ	S3(3.4)	0.018			1		1
chr12	11322500	11665656	343	12p13.2	0.12	HIGD1AP8,PRB1,PRB2,PRB3,PRB4,PRR4,RP11-144O23.20,RP11-711K1.7,RP11-711K1.8,RP11-785H5.1,RP11-785H5.2,TAS2R14,TAS2R42,TAS2R67P	S3(3.1)	0
chr10	52041500	52384923	343	10q11.23	1.229	AC069547.1,AC069547.2,AL596137.1,RMRPP4,RNU7-107P,RP11-50E11.3,RP11-512N4.2,SGMS1	S2(3.6)	0
chr15	50095500	50438500	343	15q21.2	0.045	ATP8B4,CTD-2647E9.3,RNA5SP394	S1(4.5)	0
chr3	151975500	152318500	343	3q25.1-2	4.731	MBNL1,MBNL1-AS1,RP11-362A9.3,TMEM14E,Y_RNA:481	S1(4.5)	0
chr7	131240500	131582399	342	7q32.3	0.156	AC008085.1,AC009518.2,AC009518.3,AC093106.4,AC093106.5,AC093106.6,AC093106.7,PODXL	S2(4.4)	0
chr5	110971500	111313500	342	5q22.1	0.471	HMGN1P14,NREP,NREP-AS1,RN7SKP57,STARD4-AS1	S2(4.2)	0
chr7	47279500	47621500	342	7p12.3	0.231	TNS3	S1(5.2)	0
chr6	124942500	125284500	342	6q22.31	0.047	NKAIN2,RNF217,RP11-510H23.1	S3(3.3)	0
chr3	27069500	27410951	341	3p24.1	3.337	AC099535.1,MINOS1P3,NEK10,RNU6-342P	S2(4.2)	0
chr2	40145500	40485500	340	2p22.1	0.06	AC007253.1,SLC8A1,SLC8A1-AS1	S1(4.9)	0
chr17	9140500	9480500	340	17p13.1	0.332	AC087501.1,NTN1,RP11-565F19.2,RP11-565F19.3,RP11-565F19.4,RP11-85B7.4,STX8,WDR16	S4(2.3)	0
chr12	107716500	108055500	339	12q23.3	0.022	BTBD11,RNA5SP371,RP11-128P10.1,SNORD74:2,Y_RNA:77	S3(2.8)	0
chr1	227167500	227506500	339	1q42.13	1.793	ADCK3,CDC42BPA,RP11-1B20.1,RP11-211A18.1,RP11-211A18.2,RP5-1087E8.3	S2(4)	0
chr1	113933500	114272500	339	1p13.2	0.516	MAGI3,MTND5P20,PHTF1,RP11-512F24.1,RP4-730K3.3	S2(4)	0
chr3	43393454	43732500	339	3p21-22	0.756	ABHD5,ANO10,RP11-353H3.1,SNRK,Y_RNA:493	S1(4.6)	0
chr2	134878500	135217500	339	2q21.2-3	0.934	AC013718.1,AC016906.1,MGAT5,MIR3679,RNA5SP104,TMEM163	S2(3.5)	0
chr10	109984500	110322500	338	10q25.1	0.032	PTGES3P5,RP11-163F15.1	S4(1.8)	0
chr3	21455436	21793500	338	3p24.3	0.768	ZNF385D,ZNF385D-AS1	S4(2)	0
chr4	85549500	85887500	338	4q21.23	1.65	CDS1,RN7SL552P,RNU6-469P,WDFY3,WDFY3-AS1	S3(2.8)	0
chr15	44154500	44492500	338	15q15.3	0.122	ACTBP7,FRMD5,GAPDHP55,PIN4P1,WDR76,Y_RNA:183	S1(5.3)	0
chr18	57027194	57364500	337	18q21.32	1.449	CCBE1,RP11-27G24.1,RP11-27G24.3,RP11-2N1.1,RP11-2N1.2,RP11-760L24.1	S1(5.1)	0
chr7	120628730	120965420	337	7q31.31	0.736	CPED1,HMGN1P18,RNA5SP241,RNU6-517P	S1(4.6)	0
chr4	101931500	102268500	337	4q24	1.821	MIR1255A,PPP3CA	S3(3.2)	0
chr19	38397500	38734674	337	19q13.13-2	0.842	AC011465.1,CTB-102L5.7,CTB-102L5.8,CTC-244M17.1,CTC-450M9.1,DPF1,RN7SL663P,SIPA1L3	S1(5)	0
chr11	128813040	129149500	336	11q24.3	0.451	ARHGAP32,RNU6-874P,RNU6-876P,Y_RNA:43	S2(3.5)	0
chr15	77376326	77712500	336	15q24.3	2.623	PEAK1,RP11-741G21.1,RP11-94P14.1	S1(4.8)	0.351		1			1
chr17	35432500	35767500	335	17q12	0.959	ACACA,C17orf78,HMGB1P24,RP11-19G24.1,RP11-19G24.2,RP11-378E13.3,TADA2A	S1(4.9)	0
chr11	86748500	87083500	335	11q14.2	0.604	PSMA2P1,RP11-648O15.1,RP11-680L20.1,RP11-777F6.3,TMEM135	S2(4)	0
chr17	65362500	65697500	335	17q24.2	0.342	CTD-2653B5.1,MIR548AA2,PITPNC1,PSMD12,RN7SL756P,Y_RNA:251,snoU13:143	S1(4.9)	0
chr7	46799449	47134500	335	7p12.3	0.048	AC004870.3,AC004870.4,AC004870.5,AC004901.1,EPS15P1,MRPL42P4	S2(4.3)	0
chr3	130745693	131080741	335	3q22.1	0.125	AC083908.1,AC121332.1,ASTE1,NEK11,RNU6-726P,RP11-265F19.1,RP11-933H2.4	S4(2.3)	0
chr6	12957500	13291500	334	6p24.1	0.043	PHACTR1,RNU1-11P,RP1-257A7.4,RP1-257A7.5,TBC1D7	S3(3.2)	0
chr3	58702500	59036500	334	3p14.2	0.086	C3orf67,RP11-147N17.1	S3(3.3)	0
chr1	164527500	164861500	334	1q23.3	1.002	PBX1,RNU6-171P,RP11-477H21.2,RP11-506O24.1,RP11-506O24.2,Y_RNA:297	S3(2.7)	0
chr1	224621500	224954601	333	1q42.12	0.171	AKR1B1P1,AL596330.1,CNIH3,RP11-100E13.1,RP11-100E13.3,RP11-3L21.2,WDR26	S1(5)	0
chr4	169552500	169885500	333	4q32.3	1.007	CBR4,PALLD,RNU6-1336P,RNU6-853P,RP11-610J23.1,RP11-635L1.3,RPL9P16	G1(5.5)	0
chrX	45211500	45544500	333	Xp11.3	0.381	KRT8P14,RP1-192P9.1,RP11-245M24.1	S1(5.3)	0
chr1	68296500	68628500	332	1p31.3	0.047	AL157407.1,ARL5AP3,CTBP2P8,DIRAS3,GNG12,GNG12-AS1,RP4-609E1.2,WLS	S1(5.1)	0
chr8	74327500	74659500	332	8q21.11	0.228	RP11-116B19.2,RP11-181D18.4,RP11-463D19.1,RP11-463D19.2,STAU2,STAU2-AS1,VENTXP6	S1(4.6)	0
chr21	27210500	27542500	332	21q21.3	1.477	AP001439.2,AP001442.2,APP,RNU6-123P	S3(3)	0
chr6	82146500	82477500	331	6q14.1	0.512	AL359693.1,FAM46A,RNA5SP210,RP1-300G12.2,RP5-991C6.2,RP5-991C6.4,SNORA70:20	S2(3.6)	0
chr2	197844500	198175500	331	2q33.1	0.269	AC013264.2,AC017035.2,ANKRD44,ANKRD44-IT1,ATP5G2P3,HNRNPA3P15	S1(4.6)	0
chr7	16129275	16460500	331	7p21.2	0.161	ISPD,ISPD-AS1,RPL36AP29	S3(3.2)	0
chr2	169312500	169643048	331	2q24.3	0.501	CERS6,CERS6-AS1,MIR4774,RNU6-766P	S3(2.9)	0
chr11	75526500	75856500	330	11q13.5	0.932	CTD-2011F17.2,PPP1R1AP1,RNA5SP344,RP11-263C24.1,RP11-263C24.3,UVRAG,Y_RNA:68,Y_RNA:69	S2(4.4)	0
chr2	160143310	160473203	330	2q24.2	0.841	AC008277.1,AC009506.1,AC009506.2,BAZ2B,RP11-311B14.1,Y_RNA:448	S1(4.8)	0
chr13	24553500	24882500	329	13q12.12	0.151	C1QTNF9,IPO7P2,MIR2276,RP11-307N16.6,RP11-309I15.1,SPATA13,SPATA13-AS1	S1(5)	0
chr2	189156500	189485500	329	2q32.1-2	0.264	AC079613.1,GULP1,MIR561	S2(4.1)	0
chr5	82372500	82701500	329	5q14.2	0.23	COQ10BP2,CTD-2110K23.1,TMEM167A,XRCC4	S3(3.1)	0
chr2	122078500	122407500	329	2q14.2-3	1.209	AC018737.1,CLASP1,RNU4ATAC,RP11-204L24.2,Y_RNA:442	S1(4.5)	0
chr7	120708500	121036500	328	7q31.31	0.663	CPED1,FAM3C,RNA5SP241,RNU6-517P,WNT16	S1(4.5)	0
chr6	143857981	144185572	328	6q24.2	1.868	LTV1,PHACTR2,RP11-436I24.1,RP3-468K18.5,RP3-468K18.6	S2(4.3)	0
chr18	76828500	77155855	327	18q23	0.459	ATP9B,CTD-2286N8.2,RP11-1136J12.1,RP11-800A18.4	S4(2.3)	0
chr3	105350500	105677500	327	3q13.11	9.094	CBLB	S2(4)	0
chr18	67629039	67956500	327	18q22.2	0.717	RTTN,SOCS6	S2(4.4)	0
chrX	7065500	7392500	327	Xp22.31	0.219	HDHD1,MIR4767,STS	S3(2.6)	0
chr15	92396500	92723500	327	15q26.1	0.239	RP11-152L20.3,RP11-24J19.1,SLCO3A1	S4(2.2)	0
chr15	99191500	99518500	327	15q26.3	1.958	IGF1R,MIR4714,PGPEP1L,RP11-654A16.1,RP11-654A16.3	S2(3.7)	0
chr7	95401500	95728500	327	7q21.3	0.043	DYNC1I1	S4(2)	0
chr21	22369500	22696500	327	21q21.1	0.019	AP001136.2,NCAM2	G2(1.4)	0
chr5	72921500	73248764	327	5q13.2	0.616	ARHGEF28,CTC-575I10.1,CTD-2372A4.1,RNU7-196P	S1(5.1)	0
chr15	39886432	40213500	327	15q14-15	1.349	FSIP1,GPR176,RP11-325N19.3,RP11-37C7.1,RP11-37C7.2,RP11-37C7.3,THBS1	G1(5.6)	0
chr20	20368500	20694500	326	20p11.23	0.137	EIF4E2P1,RALGAPA2	S3(2.5)	0
chr13	33924767	34250500	326	13q13.1-2	0.02	RP11-141M1.3,RP11-179A7.2,RP11-37L2.1	S1(4.9)	0
chr2	182989500	183314500	325	2q31-32	0.055	PDE1A,PPP1R1C,RN7SL267P	S2(3.9)	0
chr2	153191500	153516500	325	2q23.3	0.777	AC012066.1,FMNL2,PRPF40A,RP11-17G11.1	S2(4.2)	0
chr4	167118500	167443500	325	4q32.3	0.14	AC093874.1,RP11-217C7.1,Y_RNA:552	G2(1.3)	0
chr4	2470500	2794749	324	4p16.3	1.16	FAM193A,RNF4,RP11-503N18.5,TNIP2,WI2-89927D4.1,Y_RNA:556	S1(5.4)	0
chr2	23609500	23933500	324	2p24.1	0.352	AC011239.1,KLHL29	S2(3.9)	0
chr12	104849072	105173500	324	12q23.3	0.691	CHST11,MIR3922,RP11-43D4.2	S1(4.8)	0
chr5	138211057	138535500	324	5q31.2	0.506	CTB-46B19.1,CTB-46B19.2,CTNNA1,RNA5SP194,SIL1	S1(4.7)	0
chr9	91611500	91934500	323	9q22.1-2	0.046	CKS2,MIR3153,RP11-82L18.2,RP11-82L18.4,S1PR3,SECISBP2,SHC3	S2(4)	0
chr12	18830500	19153500	323	12p12.3	0.027	CAPZA3,PLCZ1,PSMC1P9,RP11-361I14.2	S3(3.1)	0
chr5	96518500	96840399	322	5q15	0.096	CTD-2215E18.1,CTD-2215E18.2,CTD-2215E18.3,CTD-2278B20.1,RIOK2,RP11-155G15.2,RP11-155G15.3,YTHDF1P1	S2(3.5)	0
chr1	56724243	57045500	321	1p32.2	1.132	AC119674.1,PPAP2B,RP4-710M16.2,RPL21P23	S2(3.7)	0
chr2	158992500	159313500	321	2q24.1	0.031	CCDC148,CCDC148-AS1,HNRNPDLP2,PKP4,RN7SL393P,UPP2	S3(3.1)	0
chr4	145699500	146020500	321	4q31.21	0.296	ABCE1,ANAPC10,HSPD1P5,RN7SKP235,RP13-539F13.2,RP13-539F13.3	S3(2.5)	0
chr5	145937500	146258500	321	5q32	0.243	AC011357.1,CTB-99A3.1,KRT8P48,PPP2R2B,RN7SL791P,RNA5SP196	S4(2.3)	0
chr7	43287500	43607500	320	7p13-14	0.133	AC004692.4,AC004692.5,AC011738.4,HECW1	S2(4.1)	0
chr5	77271500	77591500	320	5q14.1	1.7	AC024568.1,AP3B1,ATP6V1G1P6,CTD-2179L22.1	S2(4.1)	0
chr7	116593500	116913500	320	7q31.2	1.049	AC002542.2,AC006326.3,AC006326.5,AC106873.4,MTND4P6,ST7,ST7-AS1,ST7-AS2,ST7-OT4,TPM3P1	S1(5)	0
chr3	124774802	125094500	320	3q21.2	1.338	DUTP1,MIR5092,RNA5SP137,RNU6-230P,RP11-775J23.2,SLC12A8,ZNF148	G1(5.6)	1		1			1
chr17	29399500	29718952	319	17q11.2	1.424	AK4P1,CTD-2370N5.3,EVI2A,EVI2B,MIR4733,NF1,OMG,RAB11FIP4,RP11-142O6.1,RP11-848P1.5,RP11-848P1.9	S1(5.2)	0
chr5	143583500	143901702	318	5q31.3	0.355	CKS1BP5,CTC-218H9.1,KCTD16	S2(3.8)	0
chr16	47177908	47495500	318	16q12.1	0.869	ITFG1,PHKB,RNA5SP424,RP11-329J18.2,RP11-329J18.3,RP11-329J18.4,RP11-474B12.1,RPL23AP72,Y_RNA:209	S3(2.7)	0
chr5	119799500	120116912	317	5q23.1	2.681	PRR16,RNU4-69P,RP11-565F4.1	S2(4)	0
chr2	168787500	169104500	317	2q24.3	1.608	AC016723.4,AC067940.1,STK39	S3(3.1)	0
chr13	95643500	95960500	317	13q32.1	0.544	ABCC4,RNU6-62P,snoU13:65	S3(3.4)	0
chrX	73196500	73513500	317	Xq13.2	0.745	BMP2KL,DDX3YP1,DDX3YP2,FTX,JPX,MIR374A,MIR374B,MIR421,MIR545,MKRN5P,RAB11FIP1P1,RN7SL648P,RP13-33H18.1,RP13-36G14.3,RP13-36G14.4,RP3-368A4.5,RP3-368A4.6,RPSAP14,UHRF2P1,USMG5P1	S2(3.9)	0
chr1	233114500	233431500	317	1q42.2	0.83	NTPCR,PCNXL2,RP5-862P8.3,RPS7P3	S3(2.7)	0
chr20	45523500	45839500	316	20q13.12	0.092	EYA2,GAPDHP54,MIR3616,RP11-323C15.2,RP5-1050K3.3,RP5-890O15.3,ZMYND8	S1(4.6)	0
chr7	151818802	152133500	315	7q36.1	1.664	GALNT11,KMT2C,RP11-208G20.2,RP11-208G20.3,SEPT7P6,YBX1P4,Y_RNA:662	S3(3.1)	0
chr3	11313994	11628500	315	3p25.3	0.782	AC026185.1,AC083855.5,ATG7,RP11-169K17.2,VGLL4	S1(5.1)	0
chr15	48624053	48938046	314	15q21.1	11.855	DUT,FBN1	G1(5.6)	0
chr5	129240500	129554500	314	5q23.3	0.295	CHSY3,CTC-575N7.1,HSPA8P4,RNA5SP191,RNU6ATAC10P	S4(1.6)	0
chr2	210288500	210602500	314	2q34	0.155	MAP2,RNA5SP118	S3(2.5)	0
chrX	122317500	122631500	314	Xq25	1.689	AL356213.1,GRIA3	S4(2)	0
chr15	72096500	72410500	314	15q23	1.278	AC022872.1,CTD-2524L6.3,MYO9A,NR2E3,RNA5SP399,RNU2-65P,RP11-390D11.1,RP11-390D11.2,SENP8	S1(5.1)	0
chr1	197437500	197751500	314	1q31.3	0.874	CRB1,DENND1B,EEF1A1P32,FAM204BP,RP11-448G4.2,RP11-448G4.4,Y_RNA:344	S2(3.9)	0
chr13	98795500	99109500	314	13q32.2	1.203	FARP1,FARP1-AS1,MIR3170,RN7SKP8,RNF113B,RP11-261P24.2,RP11-573N10.1,STK24	S1(4.7)	0
chr2	225594500	225907500	313	2q36.2	3.555	DOCK10,MIR4439	S2(4.4)	0
chr10	16859527	17171830	312	10p13	0.121	CUBN	G1(5.5)	0
chr9	3215500	3526500	311	9p24.2	0.173	AL365202.1,RFX3,RP11-62E14.2	S3(3)	0
chr6	15240500	15551500	311	6p22.3	1.47	DTNBP1,JARID2,JARID2-AS1,RNU6-522P,RNU6-645P,RP11-560J1.2	S3(2.9)	0
chr5	106698500	107008500	310	5q21.3	0.377	EFNA5	S3(2.9)	0
chr7	132457500	132767500	310	7q32-33	0.916	AC009518.8,CHCHD3	S3(3.1)	0
chr5	90675500	90984500	309	5q14.3	0.09	ARRDC3,RAB5CP2	S2(3.5)	0
chr9	85844500	86153461	309	9q21.32	0.23	FRMD3,RNU4-29P,RP11-439K3.1,RP11-439K3.3,SNORD112:47,snoU13:441	S4(2.2)	0
chr9	37766500	38075500	309	9p13.2	0.954	DCAF10,EXOSC3,PAICSP1,RNU7-124P,RP11-3J10.4,RP11-3J10.7,RP11-613M10.9,SHB,SLC25A51,TRMT10B	S1(4.7)	0
chr9	95087500	95396500	309	9q22.31	0.181	ASPN,CENPP,ECM2,IPPK,MIR4670,NOL8,OGN,OMD,RP11-19J3.5,RP11-62C3.8	S1(4.8)	0
chr2	61389231	61698500	309	2p15	2.337	AC016894.1,AHSA2,C2orf74,KIAA1841,RP11-355B11.2,RP11-479F13.1,RP11-493E12.1,RP11-493E12.2,SNORA70B,USP34	S1(4.7)	0
chrX	24711500	25020500	309	Xp21-22	0.364	AC004655.1,EEF1B2P3,POLA1,SCARNA23	S3(3)	0
chr9	129677052	129985500	308	9q33.3	0.043	ANGPTL2,RALGPS1,RP13-225O21.2	S1(4.9)	0
chr17	27949925	28257500	308	17q11.2	0.953	EFCAB5,RNU6-920P,RP11-338L22.2,RP11-68I3.11,RP11-68I3.2,RP11-68I3.5,RP11-82O19.1,RP11-82O19.2,RPL21P123,RPL9P30,SNORA70:5,SSH2,snoU13:128	S1(5.1)	0
chr5	81267500	81575280	308	5q14.1-2	0.396	AC114969.1,ATG10,ATG10-AS1,ATG10-IT1,PPIAP11,RN7SL378P,RPS23,RPS23P5:2	S2(3.5)	0
chr9	79213500	79521500	308	9q21.2	0.557	AL359314.1,PCA3,PRUNE2	S2(3.6)	0
chr2	111945500	112253500	308	2q13	0.326	AC017002.1,AC017002.2,AC068491.2,AC068491.3,AC108463.1,AC108463.2,MIR4435-1HG,MIR4435-2,RP11-181E10.3,RP11-803D5.4,RPS14P4	S1(5.1)	0
chr1	94005500	94312706	307	1p22.1	2.727	BCAR3,FNBP1L,MIR760,RP11-488P3.1,RP5-1033H22.2	G1(5.5)	0
chr11	92969500	93276500	307	11q21	0.08	AP004242.1,CCDC67,RP11-288E14.2,RP11-755E23.3,SMCO4	S3(3)	0
chr8	121518500	121824500	306	8q24.12	0.167	CTC-820M8.1,MTBP,RP11-713M15.1,RP11-713M15.2,SNTB1	S1(4.6)	0
chr20	16248500	16554500	306	20p12.1	0.169	AL118509.1,KIF16B	S4(1.8)	0
chr3	104781500	105087500	306	3q13.11	0.044	ALCAM	S2(3.6)	0
chr15	33056500	33361500	305	15q13.3	0.642	FMN1,HNRNPA1P71,RP11-758N13.3,SNORD77:1,snoU13:85	G1(5.6)	0
chr1	77747500	78052500	305	1p31.1	1.54	AC095030.1,AK5,RNU7-8P,RP11-375A5.1,ZZZ3	S1(5.4)	0
chr17	13667500	13972500	305	17p12	0.116	AC005304.1,CDRT15P1,COX10-AS1,RP11-131K5.1,RP11-131K5.2	S3(3.2)	0
chr11	100557500	100862810	305	11q22.1	0.228	AC015600.1,ARHGAP42,CTD-2383M3.1,RN7SKP115,snoU13:20	S3(3.1)	0.093	1				1
chr4	154926500	155231500	305	4q31.3	0.04	AC079298.1,DCHS2	S4(1.9)	0
chr3	127871500	128175500	304	3q21.3	0.22	EEFSEC,MIR1280,RUVBL1	S1(4.9)	0
chr3	156948997	157252500	304	3q25.31-32	0.72	PTX3,RP11-550I24.2,VEPH1	S1(5.3)	0
chr22	36120500	36424500	304	22q12.3	2.182	APOL5,NDUFA9P1,RBFOX2	S1(5.2)	0
chr2	159825500	160129500	304	2q24.2	1.038	BTF3L4P2,GSTM3P2,RNU6-580P,TANC1,WDSUB1	S1(4.9)	0
chr18	22629500	22933500	304	18q11.2	0.469	CTD-2006O16.2,RP11-958F21.3,ZNF521	S3(3.2)	0
chr1	198056500	198360500	304	1q31.3	11.78	NEK7,RP11-401A10.2	S1(4.8)	0.356		1			1
chr8	108208500	108511500	303	8q23.1	0.854	ANGPT1,AP000428.1	S2(4.1)	0
chr6	157802500	158105500	303	6q25.3	0.173	MIR3692,RP11-193H22.2,ZDHHC14	S1(4.8)	0
chr10	131264500	131567107	303	10q26.3	0.149	AL355531.1,AL355531.2,MGMT,RP11-109A6.2	S4(1.5)	0
chr8	71011500	71314500	303	8q13.3	1.157	BTF3P12,NCOA2,RP11-152C15.1,Y_RNA:715	S3(2.9)	0
chr10	113028500	113331500	303	10q25.2	0.144	BTBD7P2,RP11-309P22.1,RP11-381K7.1	S4(2.1)	0
chr14	73072500	73375500	303	14q24.2	0.297	DPF3,Y_RNA:155	G1(5.6)	0
chr22	40439500	40742506	303	22q13.1	0.593	FAM83F,RP3-496C20.1,RP6-11O7.2,TNRC6B	S1(4.7)	0
chr4	142254500	142557751	303	4q31.21	0.023	RP11-208N20.1,RP11-362F19.2,RP11-362F19.3	S2(4)	0
chr19	13315500	13618500	303	19p13.2	0.132	AC005513.1,CACNA1A	S1(5)	0
chr18	18822500	19124500	302	18q11.1-2	0.51	ESCO1,GREB1L,RP11-296E23.1,RP11-296E23.2,SNORD23:1	S2(4.1)	0
chr1	98495500	98797500	302	1p21.3	0.083	MIR137HG,NFU1P2,RP5-1070A16.1	S1(4.9)	1		1		1	2
chr12	13349649	13651500	302	12p13.1	1.863	C12orf36,EMP1,RNA5SP353,RNU6-590P	S1(5)	0
chr9	102861500	103163500	302	9q31.1	0.504	AL353805.1,INVS,NANOGP5,RN7SL75P,RP11-29B11.5,RPS2P35,TEX10	S2(4.3)	0
chr5	77763500	78065844	302	5q14.1	0.377	CTD-2045M21.1,CTD-2073O6.1,HMGB1P21,LHFPL2,SCAMP1	S1(5.2)	0
chr8	123139423	123440790	301	8q24.13	0.119	RP11-94A24.1	S1(4.8)	0
chr1	183604500	183905500	301	1q25.3	0.578	APOBEC4,ARPC5,COLGALT2,RGL1,RP11-293B7.1,RP11-444D13.1	S1(5.1)	0
chr11	43601500	43902360	301	11p11.2	0.772	HSD17B12,MIR129-2,RP11-472I20.1,RP11-472I20.2,RP11-613D13.5	S2(3.8)	0
chr1	85742773	86043933	301	1p22.3	9.663	AL590113.1,DDAH1,RP11-131L23.1,RP11-131L23.2,Y_RNA:365	G1(5.6)	0.347		1			1
chr3	19443500	19744500	301	3p24.3	0.136	KCNH8	G2(1.4)	0
chr13	77601330	77901500	300	13q22.3	1.26	MYCBP2,MYCBP2-AS1,MYCBP2-AS2	S3(3.2)	0
chr6	121356500	121656500	300	6q22.31	0.334	TBC1D32	S3(2.6)	0
chr1	241219500	241519500	300	1q43	0.023	MIR3123,RGS7,RP11-306K13.1	S3(3.3)	0
chr3	123304032	123603500	299	3q21.1	0.696	MYLK,MYLK-AS1,MYLK-AS2,RP11-9N20.3,SNORA5	S1(5.3)	0
chr5	42424500	42723500	299	5p12-13	0.114	CTD-2265D6.2,GHR,SERBP1P6	S4(2.4)	0
chr1	196278500	196577500	299	1q31.3	0.021	KCNT2,MIR4735	S4(2.3)	0
chr1	92952433	93251500	299	1p22.1	0.933	CCNJP2,EVI5,HMGB3P9,RNU4-59P,RP11-330C7.3,RP11-330C7.4,RP4-593M8.1	S1(4.8)	0
chr2	69239500	69538500	299	2p13.3	1.659	ANTXR1,MIR3126,RNA5SP96,RNU6-1216P,RP11-85D18.1	S1(5.4)	0
chr2	25598714	25896500	298	2p23.3	0.095	AC104699.1,DTNB	S1(4.8)	1			1		1
chr21	39755500	40053500	298	21q22.2	0.031	ERG,SNRPGP13	S2(4.3)	0
chr16	72794500	73092500	298	16q22.2-3	1.531	AC002044.4,AC004943.1,AC132068.1,RNU7-71P,RP5-991G20.1,RP5-991G20.2,RP5-991G20.4,ZFHX3	S2(3.5)	0
chr9	119162885	119459500	297	9q33.1	0.148	ASTN2,PAPPA,RP11-264C15.2,RP11-67K19.3,TRIM32	S2(3.8)	0
chr11	35965500	36262500	297	11p13	0.264	LDLRAD3,MIR3973,RP5-916O11.1,RP5-916O11.2,RP5-916O11.3	S1(4.6)	0
chr11	12696500	12993500	297	11p15.2-3	4.29	AC084859.1,LINC00958,RP11-47J17.1,RP11-47J17.2,RP11-47J17.3,SCARNA16:1,TEAD1	S1(5.2)	0
chr10	80007500	80304500	297	10q22.3	0.362	LINC00595,LINC00856:1,LINC00856:2,RP11-90J7.2,RP11-90J7.4,SNORA71:1	S1(4.7)	1				1	1
chr7	115843500	116140500	297	7q31.2	0.146	AC002066.1,AC002066.2,AC073130.1,AC073130.3,CAV2,TES,snoZ185	G1(5.6)	0
chr13	99441500	99738500	297	13q32.3	0.257	DOCK9,DOCK9-AS1,RNU6-83P,RPL7L1P12	S2(4.1)	0
chr1	12290500	12587765	297	1p36.22	1.157	SNORA59A,VPS13D	S1(5)	0
chr7	93731500	94027500	296	7q21.3	0.205	COL1A2	G1(5.5)	0
chr4	129208500	129504500	296	4q28.2	0.105	PGRMC2,RP11-130C6.1,RP11-184M15.1,RP11-184M15.2,RP11-420A23.1	S1(5)	0
chr8	90474500	90769955	295	8q21.3	0.234	RP11-37B2.1	S1(4.6)	0
chr7	33944500	34239500	295	7p14.3	2.026	BMPER	S1(4.7)	0
chr3	143690500	143985500	295	3q24	0.051	C3orf58,RNA5SP144	S4(2.4)	0
chr18	65183500	65478500	295	18q22.1	0.042	DSEL,RP11-28O3.1,RP11-28O3.2,RP11-29O13.1,RP11-638L3.1,RP11-638L3.3,RP11-638L3.4	S2(4)	0
chr4	106943635	107238500	295	4q24	0.691	AIMP1,TBCK	S3(2.7)	0
chr15	36871500	37166500	295	15q14	0.971	C15orf41,CSNK1A1P1,LARP4P,RP11-16L14.2,RP11-618N24.1,TPST2P1,U3:15	S1(4.6)	0
chr2	56940500	57234500	294	2p16.1	0.046	AC008173.1	S4(1.6)	0
chr10	21999500	22293500	294	10p12.31	0.92	AL359697.1,DNAJC1,MLLT10,RN7SKP219,RN7SKP37	S3(3.2)	0
chr3	107243500	107537500	294	3q13.12	0.744	BBX	S2(3.5)	0
chr8	126103500	126396500	293	8q24.13	0.762	KIAA0196,NSMCE2,RN7SL329P,RP11-550A5.2	S1(4.9)	0
chr11	108535500	108828444	293	11q22.3	0.877	CYCSP29,DDX10,RP11-801G16.2,RPS2P39	S2(3.9)	0
chr5	127583500	127875500	292	5q23.3	1.128	FBN2,SLC27A6,Y_RNA:595	S2(3.5)	0
chr12	88682500	88974500	292	12q21.32	2.002	KITLG,Y_RNA:96	S1(5.1)	0
chr3	15901500	16193500	292	3p25.1	0.051	AC090945.1,MIR563	G1(5.6)	0
chr13	96414500	96706500	292	13q32.1	0.92	DNAJC3,HMGN1P24,UGGT2	S3(3.3)	0
chr15	59373500	59665500	292	15q22.2	2.455	AC092756.1,AC092757.1,C15ORF31,CCNB2,FAM81A,LDHAL6B,MIR2116,MYO1E,RNF111,RNU4-80P,RNU6-212P,RP11-356M20.3,RP11-429D19.1,RP11-59H7.3	S1(4.5)	0
chr2	208102599	208394500	292	2q33.3	0.128	AC007879.5,AC007879.6,AC007879.7,CREB1,MIR1302-4	S1(5.3)	0
chr7	41985500	42276500	291	7p14.1	0.821	GLI3,HMGN2P30	S2(4.1)	0
chr15	56921790	57211500	290	15q21.3	0.545	RP11-31H5.1,TCF12,ZNF280D	S1(4.5)	0
chr1	243418500	243708833	290	1q43-44	1.143	AKT3,CEP170,FCF1P7,MIR4677,SDCCAG8	S3(3.3)	0
chrX	76752500	77042500	290	Xq21.1	1.264	ATRX,FABP5P15	S3(3.3)	0
chr6	107491500	107781500	290	6q21	0.487	AL590489.1,AL591516.1,AL591516.2,AL591516.3,AL591516.4,AL591516.5,PDSS2,RPS24P12	S2(3.5)	0
chr2	73612500	73901500	289	2p13.1	0.462	AC096546.1,ALMS1,ALMS1-IT1,ALMS1P,NAT8	S2(4.1)	0
chr4	102710500	102999500	289	4q24	0.022	BANK1,MTND5P5,RP11-498M5.2	S3(2.7)	0
chr9	20332500	20621500	289	9p21.3	0.516	AL163193.1,MIR4473,MIR4474,MLLT3,RNU4-26P,RP11-73E6.2	S3(3.4)	0
chr4	48493500	48782500	289	4p11	1.38	FRYL,RNU5E-3P,ZAR1	S2(4.2)	0
chr17	9813500	10101500	288	17p13.1	0.104	AC000003.1,AC000003.2,GAS7	S3(2.8)	0
chr14	90994500	91282500	288	14q32.11	0.318	AL096869.1,CTD-3035D6.1,RP11-1078H9.2,RP11-1078H9.5,RP11-661G16.1,RP11-661G16.2,TTC7B	S2(3.5)	0
chr5	158757500	159044500	287	5q33.3	0.025	AC008697.1,AC008703.1,AC008703.2,IL12B	S2(3.6)	0
chr2	24714500	25001500	287	2p23.3	0.681	NCOA1,RNA5SP88,RNU6-936P	S2(4.4)	1			1		1
chr4	107481500	107768500	287	4q24-25	0.021	ACTR6P1	S3(2.6)	0
chr3	105716500	106003500	287	3q13.11	0.046		S2(4)	0
chr1	175889649	176176500	287	1q25.1-2	2.008	RFWD2,RP11-318C24.1,RP11-492I21.1,SCARNA3	S4(2.1)	0
chr8	119755500	120041500	286	8q24.12	0.046	COLEC10,RNU6-12P,RP11-278I4.1,RPS26P35,TNFRSF11B	G1(5.6)	0
chr4	71767500	72053002	286	4q13.3	0.602	DCK,MOB1B	S1(4.8)	0
chr1	213223500	213509500	286	1q32.3	1.117	RPS6KC1	S3(3.1)	0
chr10	29739500	30024500	285	10p11.23	0.467	MIR604,MIR938,PTCHD3P1,RNU6-908P,RP11-192N10.2,SNORD115:1,SVIL	S1(5)	0
chr11	28373653	28658500	285	11p14.1	0.131	RP11-22P4.1,RP11-22P4.2	S1(4.8)	0
chr16	53088500	53373500	285	16q12.2	2.027	CHD9,RNA5SP427,RP11-295M3.2,RP11-454F8.2,Y_RNA:212,snoU13:105	S3(2.6)	0
chr11	31530500	31815500	285	11p13	0.265	AC131571.1,AC131571.2,ELP4,IMMP1L,PAX6,Z83001.1,Z83307.3	S3(2.8)	0
chr7	104745930	105029500	284	7q22.3	1.903	CTB-152G17.4,CTB-152G17.5,KMT2E,RNU6-1322P,RP4-778K6.1,RP4-778K6.3,RWDD4P1,SRPK2	S1(5.2)	0
chr11	33279500	33563617	284	11p13	1.644	AL122015.1,HIPK3,RP1-130L23.1,RP1-305G21.1	G1(5.5)	0
chr6	143380500	143663382	283	6q24.2	0.278	AIG1,RP1-45I4.2,RP1-95L4.2,RP1-95L4.3	S2(4.2)	0
chr5	16653500	16936500	283	5p15.1	4.783	CTB-55B8.1,MYO10,RNA5SP179	S1(4.9)	0
chrX	129755500	130038500	283	Xq26.1	0.206	ENOX2,RP5-875H3.2	S3(2.8)	0
chr2	191464500	191746500	282	2q32.2	0.064	AC005540.3,AC006460.2,GLS,NAB1	S1(5.3)	0
chr4	79697500	79979500	282	4q21.21	1.007	BMP2K,LINC01088,MIR5096,PAQR3,RN7SL127P	S2(4.1)	0.917		1			1
chr9	127624260	127905785	282	9q33.3	0.376	AL354928.1,ARPC5L,GOLGA1,RNU4-82P,RP11-474P12.3,SCAI	G1(5.6)	0
chr12	32259500	32541500	282	12p11.21	1.074	BICD1,RP11-843B15.2,RP11-956A19.1	S2(4.3)	0
chr16	81478500	81759500	281	16q23.2-3	1.002	CMIP,RP11-391L3.5	S1(5)	0
chr9	37120535	37401500	281	9p13.2	0.95	AL158155.1,RP11-220I1.4,RP11-397D12.4,Y_RNA:741,Y_RNA:742,ZCCHC7	S2(4.4)	0
chr2	62114500	62395996	281	2p15	0.502	AC018462.2,AC018462.3,CCT4,COMMD1	S2(4.1)	0
chr10	61780500	62061500	281	10q21.2	0.045	ANK3,RP11-388P9.2,Y_RNA:12	S2(3.8)	0
chr1	210073500	210354500	281	1q32.2	0.178	SYT14	S2(4.2)	0
chr1	219346500	219626500	280	1q41	0.173	LYPLAL1,RIMKLBP2,RP11-135J2.3,RP11-135J2.4,RP11-392O17.1,RP11-95P13.1	S2(3.7)	0
chr12	102930500	103210500	280	12q23.2	0.016	LINC00485	S3(3)	0
chr6	75636500	75915767	279	6q13-14	4.391	COL12A1	S2(4.4)	0
chr6	46180500	46459500	279	6p12-21	0.205	RCAN2,RP11-795J1.2	S4(2.3)	0
chr4	170255500	170534500	279	4q33	0.453	CLCN3,NEK1	S1(5.2)	0
chr2	170683967	170962500	279	2q31.1	1.675	AC092641.2,UBR3	S3(3.2)	0
chr5	13733500	14012500	279	5p15.2	0.042	CTB-51A17.1,DNAH5	S1(5.4)	0
chr4	147165500	147444500	279	4q31.22	0.592	SLC10A7	S3(2.7)	0
chr5	102090500	102368079	278	5q21.1	2.488	PAM	S2(3.8)	0
chr5	79945500	80223500	278	5q14.1	0.684	DHFR,MSH3,MTRNR2L2,RP11-241J12.1,RP11-241J12.3	S2(4.1)	0
chr3	119535500	119813500	278	3q13.33	3.655	GSK3B,NR1I2,RP11-767L7.1,RP11-767L7.2	S1(4.8)	0
chr10	93771500	94049500	278	10q23.32	0.222	AL158040.1,BTAF1,CPEB3,CPEB3_ribozyme,EIF4A1P8,NHP2P1,SDHCP2,SNORA25:1,Y_RNA:36	S1(4.6)	0
chr1	169061500	169338500	277	1q24.2	0.249	ATP1B1,BLZF1,NME7,RP4-800F24.1,RP5-1018K9.1	S3(2.5)	0
chr17	13227500	13504500	277	17p12	0.589	AC005375.1,HS3ST3A1,MIR548H3	S1(4.5)	0
chr3	33482863	33759500	277	3p22.3	0.571	AC132515.1,CLASP2,RNA5SP128	S1(4.7)	0
chr2	121480500	121757500	277	2q14.2	0.753	GLI2,RP11-297J22.1	S1(5.2)	0
chrX	10851773	11129261	277	Xp22.2	0.063	RP11-120D5.1	S2(3.7)	0
chr6	138736500	139013500	277	6q23-24	0.223	HEBP2,MIR3145,NHSL1,RP11-390P2.2	S3(3.3)	0
chr9	5352410	5629500	277	9p24.1	0.197	CD274,KIAA1432,PDCD1LG2,PLGRKT,RP11-12D24.6,RP11-12D24.7,RP11-574F11.3	S1(5.4)	0
chr17	70312500	70589500	277	17q24.3	0.439	LINC00511,RP11-1124B17.1,RP11-57A1.1	S1(4.9)	0
chr21	29323500	29600986	277	21q21.3	0.047	AJ006995.3,AL035610.1,AL035610.2,LINC00314	S2(4.2)	0
chr15	67835046	68112500	277	15q23	0.375	HNRNPA1P5,MAP2K5,SKOR1	S1(4.8)	0
chr18	21700500	21977500	277	18q11.2	0.208	CABYR,MIR320C2,OSBPL1A,RN7SL247P,RNA5SP452,RNU5A-6P,RNU6-435P,RP11-621L6.2,RP11-799B12.2,RP11-799B12.4,TTC39C	S2(4.3)	0
chr9	128194500	128470500	276	9q33.3	1.789	HNRNPA1P15,MAPKAP1,RN7SL30P,RP11-12A16.3	S1(5.1)	0.349		1			1
chr6	158126500	158402887	276	6q25.3	2.427	RNU6-786P,RP11-52J3.2,RP11-52J3.3,RP3-403L10.2,RP3-403L10.3,SNX9	G1(5.6)	0
chr10	53798500	54074055	276	10q21.1	0.476	PRKG1,PRKG1-AS1	S2(4.3)	0.214		1		1	2
chr2	190944500	191220500	276	2q32.2	0.405	C2orf88,HIBCH,INPP1	S2(4.4)	0
chr4	143830500	144106500	276	4q31.21	0.03	RP11-284M14.1,RP11-54P19.1,USP38	S3(3.4)	0
chr1	92075500	92351500	276	1p22.1	1.656	HSP90B3P,RN7SL653P,TGFBR3	S1(5.2)	0
chr7	134395500	134671258	276	7q33	9.211	CALD1,TUBB3P2	S1(5.4)	0
chr7	105241322	105517500	276	7q22.3	0.633	ATXN7L1,CDHR3,CTA-351J1.1	S1(4.8)	0
chr4	26584500	26859299	275	4p15.2	0.691	AC093807.1,SNORD74:6,TBC1D19	S1(4.5)	0
chr4	141778500	142053500	275	4q31.21	0.481	RNF150	S2(3.5)	0
chr12	19592500	19867500	275	12p12.3	0.524	AEBP2,EEF1A1P4,RNU6-254P,RP11-841C19.1	S2(3.5)	0
chr18	60383500	60658500	275	18q21.33	0.445	AC015989.1,AC015989.2,PHLPP1,RNU6-142P	S3(3.2)	0
chr8	25041500	25316512	275	8p21.2	3.321	DOCK5,GNRH1,KCTD9,RP11-395I14.2	S1(4.6)	0
chr1	180600500	180875786	275	1q25.3	0.752	AL590085.1,U6:7,XPR1	S1(4.8)	0
chr10	105341500	105615500	274	10q24.33	0.518	NEURL,RP11-416N2.4,SH3PXD2A,Y_RNA:2	G1(5.5)	0
chr13	73355500	73629113	274	13q22.1	0.731	AL391384.1,DIS3,PIBF1,PSMD10P3,RNU6-79P	S3(3.4)	0
chr8	32812500	33086500	274	8p12	0.02	AC104037.1,MTND1P6,MTND2P32,RANP9,RP11-11N9.4,RP11-451O18.1	S2(4.1)	0
chr9	124581731	124855500	274	9q33.2	0.32	TTLL11,TTLL11-IT1	S1(5.3)	0
chr2	30669500	30943500	274	2p23.1	0.863	LCLAT1	S2(4.2)	0
chr6	131110500	131384500	274	6q23.1-2	1.174	EPB41L2,SMLR1	S1(4.9)	0
chr18	25491500	25764500	273	18q12.1	3.781	AC015933.2,CDH2	S3(2.9)	0
chr13	38172981	38445500	273	13q13.3	2.092	RNA5SP26,TRPC4	S2(3.7)	0
chr14	36005500	36278500	273	14q13.2	0.919	AL162311.1,INSM2,QRSL1P3,RALGAPA1,SNORA31:6,snoU13:79	S2(4.3)	0
chr10	74114988	74386500	272	10q22.1	0.902	AL513185.1,MICU1,Metazoa_SRP:1,RNU6-805P,RP11-167P22.3,RP11-167P22.4	S1(5.3)	0
chr7	72032500	72304500	272	7q11.22-23	0.094	AC091738.2,MIR4650-2,RN7SL377P,RP11-1394O16.1,RP11-535E8.2,SBDSP1,TYW1B	S2(3.9)	0
chr8	133879202	134151500	272	8q24.22	0.041	CTD-2182N23.1,SLA,TG	S2(4.4)	0
chr11	85066500	85338966	272	11q14.1	0.032	DLG2,RNU6-1292P,RP11-482L11.1	S2(4.1)	0
chr3	149182617	149454501	272	3q25.1	1.518	RNU6-1098P,RP11-278L15.4,RP11-278L15.6,TM4SF4,WWTR1,WWTR1-AS1,WWTR1-IT1	G1(5.6)	0
chr2	152685006	152955593	271	2q23.3	0.019	AC079790.2,CACNB4	S2(3.6)	0
chr18	21269500	21540500	271	18q11.2	0.12	AC010754.1,LAMA3,RP11-403A21.1,RPL23AP77	S1(4.9)	0
chr8	135454500	135725500	271	8q24.22	0.314	CTD-2342N23.2,ZFAT,ZFAT-AS1	S3(2.8)	0
chr3	100459500	100730500	271	3q12.2	0.829	ABI3BP,RNU6-865P,RP11-301G23.1,TFG	S1(4.5)	0
chr13	97794500	98065500	271	13q32.1	2.271	LINC00456,MBNL2,RNA5SP37	S1(4.5)	0
chr2	32582095	32853098	271	2p22.3	2.69	BIRC6,BIRC6-AS1,MIR558	S1(4.6)	0
chr20	50537500	50808500	271	20q13.2	0.158	ERP29P1,RN7SL603P,ZFP64	S2(4)	0
chrX	44732500	45002500	270	Xp11.3	1.887	KDM6A,RNU6-523P	S3(3.3)	0
chr3	8274500	8544500	270	3p26.1	0.037	AC023481.1,LMCD1,LMCD1-AS1,RNU4ATAC17P	S2(4.4)	0
chr3	129342500	129612500	270	3q22.1	1.061	AC083799.1,RNU6-1142P,RP11-263I1.1,TMCC1,Y_RNA:480	S1(5.1)	0
chr10	63659500	63929500	270	10q21.2	2.278	AC067742.1,AL671972.1,ARID5B	G1(5.5)	0
chr21	36153500	36422500	269	21q22.12	3.125	AP000330.8,RUNX1	S1(4.9)	0.428		1			1
chr3	196756687	197025500	269	3q29	2.455	DLG1,DLG1-AS1,MIR4797	S1(4.9)	0
chr4	160024500	160293500	269	4q32.1	0.934	AC095064.1,AC105316.1,MIR3688-2,RAPGEF2	S1(4.7)	0
chr7	65670185	65939542	269	7q11.21	1.202	GS1-124K5.2,GS1-124K5.6,LINC00174,RNU6-313P,RNU6-96P,RP11-792A8.1,SKP1P1,TPST1,snoU13:395	G1(5.5)	0
chr12	94070500	94338816	268	12q22	0.174	CRADD,RN7SL630P,RP11-1060G2.1,RP11-887P2.5,RP11-887P2.6	S1(4.9)	0
chr2	45571500	45839500	268	2p21	0.564	RN7SL414P,SRBD1	S1(4.7)	0
chr3	87841500	88108423	267	3p11.1-2	0.228	CGGBP1,HTR1F,RNU6ATAC6P,RP11-451B8.1	S4(2.3)	0
chr6	111927481	112194500	267	6q21	1.479	FYN,snoU13:375	S1(5.2)	0
chr13	32605436	32872290	267	13q13.1	0.345	FRY,FRY-AS1	S2(4.4)	0
chr2	216447358	216714500	267	2q35	0.4	AC012668.2,AC093850.1,AC093850.2,LINC00607	G1(5.5)	0
chr10	80829500	81095500	266	10q22.3	1.575	ZMIZ1	S1(5.4)	0.168				1	1
chr9	114393500	114659045	266	9q31.3	0.312	C9orf84,DNAJC25,DNAJC25-GNG10,GNG10,LRRC37A5P,RNU6-1013P,RP11-430K21.2	G1(5.6)	0
chr9	35161500	35427500	266	9p13.3	0.254	AL160274.1,ATP8B5P,UNC13B	S1(4.7)	0
chrX	131351500	131616500	265	Xq26.2	0.145	MBNL3,RAP2C,RAP2C-AS1	S4(2)	0
chr6	169837500	170102159	265	6q27	0.244	AL513547.1,WDR27	S2(3.7)	0
chr1	202309500	202573395	264	1q32.1	0.28	PPP1R12B,RP11-175B9.2,RP11-175B9.3,RP11-396D18.1,SNORA70:12,SYT2,U6:8,UBE2T	S1(5.1)	0
chr9	115249126	115513117	264	9q32	0.468	C9orf147,INIP,KIAA1958,RP11-276E15.4,RP11-576C12.1	S1(4.9)	0
chrX	9433500	9697500	264	Xp22.2-31	0.379	GPR143,TBL1X	S2(3.8)	0
chr2	227033500	227297500	264	2q36.3	0.033	AC068138.1	S1(4.8)	0
chr2	42795500	43058500	263	2p21	0.516	AC074375.1,AC098824.6,FTOP1,HAAO,MTA3,OXER1,RNU6-137P,Y_RNA:433	S1(4.7)	0
chrX	71529500	71792500	263	Xq13.1	0.273	HDAC8,RNU2-68P	S2(4.2)	0
chr5	8583500	8846500	263	5p15.31	0.024	MTND6P2,RP11-143A12.3,RP11-315A16.1,RP11-417J1.3	S2(3.7)	0
chr16	68876500	69139466	263	16q22.1	0.468	RNU6-898P,RP11-123C5.5,RP11-521L9.1,RP11-521L9.2,RPS2P45,TANGO6,Y_RNA:216	S1(5.2)	0
chr2	190044605	190307500	263	2q32.2	0.033	AC118063.1,KRT18P19,WDR75	G1(5.6)	0
chrX	107682500	107945500	263	Xq22.3	0.125	COL4A5,COL4A6,Y_RNA:785	S4(2.3)	0
chr6	133828500	134090500	262	6q23.2	0.037	EYA4,FTH1P26,RP11-704J17.2,RP11-704J17.5,RP3-323P13.2	S1(4.5)	0
chr16	47494500	47756500	262	16q12.1	0.689	EIF4BP5,ITFG1,NDUFA5P11,PHKB,RNA5SP425,RP11-177N22.2,RP11-177N22.3	S3(3.2)	0
chr5	178510195	178772500	262	5q35.3	1.796	ADAMTS2,ZNF354C	S3(3.4)	0
chr12	39037500	39299500	262	12q12	0.188	CPNE8	S4(1.5)	0
chr12	19283500	19545500	262	12p12.3	0.642	PLEKHA5,RN7SL459P,RN7SL67P,RP11-282K24.3	S2(3.5)	0
chr3	156893011	157154577	262	3q25.31-32	0.078	RP11-550I24.2,RP11-550I24.3,VEPH1	G1(5.5)	0
chr3	126422500	126683500	261	3q21.3	0.26	CHCHD6,RCC2P4	S2(3.8)	0
chr21	33681048	33942500	261	21q22.11	0.507	C21orf119,EVA1C,EXOSC3P1,MRAP,RN7SL109P,RNA5SP490,SNORA33:1,SNORA80,URB1	S1(4.7)	0
chr4	169931426	170192500	261	4q32-33	8.068	RP11-327O17.2,RP11-483A20.3,RPL6P12,SH3RF1	S1(5.4)	0
chr1	29215500	29476500	261	1p35.3	0.164	EPB41,RP11-242O24.3,RP4-604A21.1,SRSF4,TMEM200B,Y_RNA:314	S1(5.1)	0
chr10	120967500	121228500	261	10q26.11	0.671	GRK5,MIR4681,RN7SL749P,RP11-567J24.4,RP11-79M19.2	G1(5.6)	0
chr6	11538500	11799500	261	6p24.1-2	0.069	ADTRP,RP11-679B17.2,SNORA67:5,TMEM170B	S1(4.7)	1			1		1
chr14	25259500	25519500	260	14q12	0.678	STXBP6	S3(3.2)	0
chr6	151177500	151437500	260	6q25.1	2.056	AL133260.1,MTHFD1L,RNU6-302P,RP1-292B18.1,RP1-292B18.3,RP1-292B18.4,RP1-99E18.2	S1(4.7)	0
chr4	184020500	184280500	260	4q35.1	2.693	CLDN22,CLDN24,RNU7-158P,U3:53,WWC2,WWC2-AS1,snoU13:314,snoU13:323	S1(5.1)	0
chr11	103775500	104035500	260	11q22.3	0.036	DDI1,PDGFD,RP11-617B3.2	S3(3.3)	0
chr22	44318500	44578500	260	22q13.31	0.603	PARVB,PARVG,PNPLA3,RP4-796I17.5,SAMM50	S2(4.1)	0
chr22	40773500	41033500	260	22q13.1-2	1.504	ADSL,AL031594.1,COX6B1P3,MKL1,RP4-591N18.2,RP5-1042K10.10,RP5-1042K10.12,RP5-1042K10.13,RPL4P6,SGSM3	S1(5.3)	0
chr8	94929500	95188500	259	8q22.1	0.257	AC105081.1,CDH17,KB-1184D12.1,PDP1,PSMA2P2,RPL34P18	S1(5.4)	0
chr3	23986500	24245500	259	3p24.2	0.445	LINC00691,NKIRAS1,NPM1P23,NR1D2,THRB	S1(4.7)	0
chr12	124792500	125051500	259	12q24.31	0.782	FAM101A,NCOR2,RP11-408I18.9,RP11-83B20.1	S1(4.6)	0
chr11	116710500	116969153	259	11q23.3	1.043	AP000936.1,AP000936.2,AP006216.12,RNY4P6,SIK3,SIK3-IT1	S1(5.3)	0
chr2	64751227	65010500	259	2p14	1.073	AC007365.1,AC007365.2,AC007365.3,AC007365.4,AFTPH,RNU6-100P,SERTAD2	S1(5.3)	0
chr17	1948262	2207065	259	17p13.3	0.938	AC090617.1,AC130689.5,AL450226.2,HIC1,MIR132,MIR212,RN7SL624P,RP11-667K14.5,RP11-667K14.8,SMG6,SRR	G1(5.5)	0
chr7	66460159	66718500	258	7q11.21	0.155	AC073089.1,MIR4650-1,RP11-324F21.1,SBDS,TYW1	S1(5)	0
chr8	121136500	121394500	258	8q24.12	0.261	COL14A1,MRPL13	S2(4.1)	0
chr9	505500	763500	258	9p24.3	0.609	KANK1,RN7SL412P,RNU6-1327P,RP11-130C19.1,RP11-130C19.3,RP11-31F19.1	S2(3.8)	0
chr1	62896500	63154500	258	1p31.3	1.836	AL138847.1,ANGPTL3,DOCK7,RP11-230B22.1,RP11-293K19.1,RP5-849H19.2,USP1	S2(4)	0
chr11	86125500	86383500	258	11q14.2	0.164	CCDC81,ME3,PTP4A1P6,RP11-317J19.1	G1(5.6)	0
chr2	98354500	98612500	258	2q11.2	1.64	HMGN1P36,RNU7-96P,TMEM131,ZAP70	S3(3.2)	0
chrX	138757500	139014500	257	Xq27.1	0.936	ATP11C,MCF2,MIR505,RNU6ATAC23P,SNORA18:8,snoU13:460	S4(2.2)	0
chr3	176658500	176915500	257	3q26.32	1.998	MTND5P15,RNU6-681P,TBL1XR1,TBL1XR1-AS1,Y_RNA:513	S2(3.6)	0
chr6	119752500	120009500	257	6q22.31	0.02		S4(2.3)	0
chr12	80837500	81094500	257	12q21.31	0.071	PTPRQ,RP11-272K23.3,RP11-272K23.4	S1(5)	0
chr7	66056500	66313482	257	7q11.21	1.766	GS1-124K5.12,GTF2IRD1P1,KCTD7,RABGEF1,RP11-792A8.3,RP11-792A8.4,RP4-756H11.3,RPL35P5,snoU13:410	G1(5.5)	0
chr10	114708500	114965500	257	10q25.2-3	2.171	RP11-139K1.2,RP11-57H14.2,TCF7L2	S2(4.3)	0
chr1	184355500	184611500	256	1q25.3	0.624	C1orf21,GS1-115G20.1,GS1-115G20.2,RP11-382D12.2	S2(4.4)	0
chr2	37571500	37827278	256	2p22.2	0.059	QPCT,RNU6-1116P	G1(5.6)	0
chr5	153569500	153825516	256	5q33.2	2.705	AC008625.1,GALNT10,HNRNPA3P7,MFAP3,MIR1294,RN7SL655P,SAP30L-AS1	S2(4.2)	0
chr12	11802500	12057500	255	12p13.2	0.71	ETV6	S2(4.2)	0
chr2	200073500	200328500	255	2q33.1	1.323	RP11-486F17.1,SATB2,SATB2-AS1	S3(2.6)	0
chr21	35445500	35700500	255	21q22.11	0.575	AP000318.1,AP000318.2,AP000320.7,LINC00310,MRPS6,RPS5P2,SLC5A3	S2(4.4)	0
chr6	118776155	119031500	255	6q22.31	1.289	BRD7P3,CEP85L,PLN,SSXP10	S2(4)	0
chrX	149107500	149362500	255	Xq28	0.133	LINC00894,RP11-49C9.2	S1(4.6)	0
chr18	29795500	30050500	255	18q12.1	0.063	AC021224.1,GAREM,HNRNPA1P7,MEP1B,RP11-344B2.2,RP11-344B2.3,Y_RNA:267	S4(2.1)	0
chr8	15397500	15652500	255	8p22	0.844	RP11-235P11.1,TUSC3	S3(2.7)	0
chr7	38417500	38671500	254	7p14.1	0.246	AMPH,RN7SL83P	S4(2.4)	0
chr3	159949500	160203561	254	3q25.33	0.426	IFT80,MIR15B,MIR16-2,RNU7-136P,RP11-227J5.3,RP11-432B6.1,RP11-432B6.3,SMC4,TRIM59	S1(5.2)	0
chr9	127278335	127532500	254	9q33.3	0.042	MIR181A2,MIR181A2HG,MIR181B2,NR6A1,RN7SL302P,RP11-164H5.1,RP11-175D17.3	G1(5.5)	0
chr6	4776500	5030205	254	6p25.1	1.49	CDYL,RP11-428J1.2,RPP40	S2(4.3)	0
chr11	103419500	103673500	254	11q22.3	0.042	RP11-563P16.1	S1(4.6)	0.497		1			1
chr7	92219708	92473500	254	7q21.2	3.91	AC002454.1,CDK6,RNU6-10P	S1(4.9)	0
chr7	140917500	141171500	254	7q34	0.02	RP5-842K16.1,RP5-842K16.2,RP5-914M6.1,TMEM178B	S4(2.3)	0
chr9	118915500	119169500	254	9q33.1	0.884	AL137024.1,AL353141.1,PAPPA,PAPPA-AS1,PAPPA-AS2,RP11-45A16.4	S1(4.6)	0
chr10	16605500	16859527	254	10p13	1.557	RP11-197M22.2,RSU1	S2(4.3)	0
chr9	140513443	140767500	254	9q34.3	0.92	EHMT1,MIR602,RP11-188C12.2,RP11-188C12.3,SETP5	S1(4.5)	0
chr2	120516500	120770580	254	2q14.2	0.526	AC016691.2,PTPN4,snoU13:233	S2(4.1)	0
chr1	82234500	82487500	253	1p31.1	1.781	LPHN2	S4(2.3)	0
chr8	69764998	70017500	253	8q13.2	0.224	RP11-600K15.1	S2(4.1)	0
chrX	57147500	57400500	253	Xp11.21	0.087	FAAH2,PPP1R11P2,RP3-323P24.3,SPIN2A,SPIN2B	S4(1.7)	0
chr2	67373500	67626500	253	2p14	0.038	AC023115.1,AC023115.2,AC023115.4,AC078941.1,ETAA1	S1(4.8)	0
chr15	73345500	73598500	253	15q24.1	0.15	FKBP1AP2,NEO1,NPM1P43,RP11-272D12.2	S3(3.2)	0
chr5	64063500	64315864	252	5q12.3	0.546	CWC27,SREK1IP1	S1(5.2)	1		1			1
chr21	38110500	38362500	252	21q22.13	0.448	AP000704.5,DPRXP5,HLCS,HLCS-IT1,RNA5SP491,SIM2,Y_RNA:397	S1(4.5)	0
chr11	121987031	122239500	252	11q24.1	8.614	MIR100,MIRLET7A2,RP11-716H6.1,RP11-716H6.2,RP11-820L6.1	S1(5.2)	0
chr12	50898500	51150674	252	12q13.12	0.915	DIP2B,RNU6-238P,RNU6-769P,Y_RNA:89	S1(5.2)	0
chr3	184529500	184781500	252	3q27.2	0.655	VPS8	S2(4.1)	0
chr2	23897500	24149500	252	2p23-24	0.972	AC066692.3,ATAD2B,KLHL29,PGAM1P6	S1(4.8)	0
chr13	33672500	33924767	252	13q13.1	1.965	AL138999.1,RP11-141M1.1,STARD13,STARD13-AS,STARD13-IT1	S1(4.6)	0
chr5	78281910	78532500	251	5q14.1	0.034	AC016559.1,BHMT,BHMT2,CTC-422A18.1,CTC-422A18.2,CTD-2299I21.1,DMGDH,JMY,RNY3P1,SNORA18:6	S2(4.2)	0
chr19	31593500	31844500	251	19q12	1.155	AC007796.1,AC020952.1,CTC-439O9.3,TSHZ3	S2(4.1)	0
chr3	106328500	106579500	251	3q13.12	0.033	FCF1P3,LINC00882,Y_RNA:476	S2(3.8)	0
chr15	94773500	95024039	251	15q26.2	0.093	MCTP2,RP11-354B3.1	S3(2.5)	0
chr4	157648500	157899500	251	4q32.1	4.909	PDGFC,RP11-154F14.2,RP11-612J15.3	S1(4.7)	0
chr10	97599500	97850500	251	10q24.1	0.085	C10orf131,CC2D2B,CCNJ,ENTPD1,ENTPD1-AS1,MIR3157,RP11-248J23.5,RP11-248J23.6,RP11-248J23.7,RP11-429G19.3,RP11-690P14.4	S4(2.4)	0
chr10	35625500	35875500	250	10p11.21	1.746	CCNY	S2(4.2)	0
chr17	54347500	54597500	250	17q22	0.024	ANKFN1,RP11-502F1.2	S3(3.4)	0
chr6	80815500	81065140	250	6q14.1	0.456	BCKDHB	S3(3.2)	0
chr16	64905500	65155500	250	16q21	3.512	CDH11	S2(3.5)	0
chr3	73424500	73674500	250	3p13	1.931	PDZRN3,PDZRN3-AS1,RNU7-119P	S2(4.3)	0
chr16	70957500	71207500	250	16q22.2	0.033	HYDIN,RP11-23E19.1,RP11-23E19.2	S3(3.3)	0
chr9	77702500	77952500	250	9q21.13	0.333	NMRK1,OSTF1,RNU6-1228P,Y_RNA:763	S3(3)	0
chr22	18257536	18507325	250	22q11.21	1.347	LINC00528,MICAL3,MIR648,RHEBP3,XXbac-B461K10.4,XXbac-B476C20.13,XXbac-B476C20.14	S1(5.4)	0
chr6	4334500	4583500	249	6p25.1	0.058	RNA5SP202,RP1-21P18.1,RP11-274H24.1,RP3-527G5.1	S2(4.4)	0
chr2	9314500	9563696	249	2p25.1	3.525	ASAP2,ITGB1BP1,RP11-385J23.1	G1(5.5)	0
chr8	62378500	62627500	249	8q12.3	4.829	ASPH,CLVS1,KRT8P3,MIR4470,RN7SKP97	S1(4.7)	0
chr9	79792500	80041500	249	9q21.2	0.528	GNA14,VPS13A,VPS13A-AS1	S3(3.4)	0
chr7	22148500	22396763	248	7p15.3	0.019	RAPGEF5,RNA5SP227	S3(3.4)	0
chr3	47882500	48130500	248	3p21.31	3.063	DHX30,MAP4,MIR1226,RP11-1029M24.4,VPS26BP1,Y_RNA:522	G1(5.5)	0
chr2	218626014	218874500	248	2q35	1.745	AC009469.1,AC010136.2,TNS1	S1(5.1)	0
chr2	54952500	55200500	248	2p16.1-2	0.031	AC104781.1,EML6,RNU7-81P,RTN4	S1(5.3)	0
chr15	52573500	52821247	248	15q21.2	0.899	EEF1B2P1,MYO5A,MYO5C	S1(4.9)	0
chr4	5466500	5714500	248	4p16.2	0.568	C4orf6,EVC,EVC2,STK32B	S3(3.2)	0
chr15	33010174	33258500	248	15q13.3	4.456	FMN1,GREM1,RP11-758N13.1,RP11-758N13.3,snoU13:85	G1(5.6)	0
chr10	134350500	134598500	248	10q26.3	0.454	INPP5A,NKX6-2,RP11-288G11.3	S1(4.5)	0
chr3	67703500	67950500	247	3p14.1	0.079	AC113171.1,RP11-81N13.1,SUCLG2	S3(2.6)	0
chr1	103328500	103575500	247	1p21.1	0.153	COL11A1,SOD2P1	S3(3.1)	0
chr9	72040500	72287222	247	9q21.11-12	0.248	APBA1,RP11-470P21.2,RP11-548B3.3	S2(4.4)	0
chr1	217799500	218046500	247	1q41	0.025	GPATCH2,RP11-415L24.1,SPATA17,UBBP2	S4(2.2)	0
chr2	192811500	193058500	247	2q32.3	0.045	AC098617.1,TMEFF2	S2(4)	0
chr1	180225500	180472500	247	1q25.2-3	1.143	ACBD6,LHX4,MIR3121,RP5-1180C10.2,VDAC1P4	S1(5.1)	0
chr11	10329859	10576500	247	11p15.4	0.326	AMPD3,MRVI1-AS1,MTRNR2L8,RNF141,RNU6ATAC33P	G1(5.6)	0
chr7	102468500	102715286	247	7q22.1	0.027	AC073127.1,FBXL13,LRRC17,NFE4,RN7SKP198,RNU6-1136P,RP11-645N11.3	S1(5.4)	0
chr22	25348500	25595500	247	22q11.23	0.069	CTA-221G9.10,CTA-221G9.11,KIAA1671	S3(2.7)	0
chr12	112574500	112820500	246	12q24.13	0.714	HECTD4,RN7SKP71,RP3-521E19.2,RP3-521E19.3,RPL7AP60,TRAFD1,Y_RNA:80	G1(5.5)	0
chr6	130441500	130687500	246	6q23.1	0.973	L3MBTL3,RP11-73O6.3,SAMD3,TMEM200A	S2(4.4)	0
chr4	120987500	121232500	245	4q27	0.043	LTV1P1,MAD2L1,RP11-679C8.2	S3(3)	0
chr9	102337500	102582500	245	9q22.33	0.078	RP11-554F20.1	S2(3.9)	0
chr6	74362500	74607500	245	6q13	1.079	CD109,RP11-553A21.3,SLC17A5	S1(5.2)	0
chr11	8693413	8938500	245	11p15.4	0.367	AKIP1,RNA5SP330,RP11-152H18.3,RP11-152H18.4,RP11-318C2.1,RPL27A,SNORA3:1,SNORA45,ST5,Y_RNA:71	G1(5.6)	0
chr12	80084877	80329500	245	12q21.2-31	5.028	AC073569.1,PPP1R12A,RNA5SP363,RP11-530C5.1,RP11-530C5.2,RP11-84G21.1	S1(4.8)	0
chr6	110891500	111136500	245	6q21	0.339	CDK19,RNU6-957P,RP11-346C16.1,RP11-346C16.2,RP11-346C16.6,RP11-569A2.2	S1(4.8)	0
chr9	136611500	136856500	245	9q34.2	0.433	AL590710.1,VAV2	S2(4.3)	0
chr6	52197500	52442500	245	6p12.2	2.498	EFHC1,PAQR8,TRAM2,TRAM2-AS1	S1(5.4)	0
chr9	79034751	79278500	244	9q21.13-2	0.236	AL161626.1,GCNT1,PRUNE2,RP11-214N16.2,RP11-66C24.1	S2(4.2)	0
chr6	47836500	48080500	244	6p12.3	0.11	PTCHD4	S4(1.7)	0
chr6	45391500	45635500	244	6p21.1	0.384	RNU6-515P,RP1-166H4.2,RUNX2	S1(5.1)	0
chr11	28129500	28373653	244	11p14.1	1.025	AC104978.1,KIF18A,METTL15,RN7SKP158,RP11-797J4.1	S2(4.4)	0
chr9	124307500	124551500	244	9q33.2	0.088	DAB2IP,RP11-524G24.2	S1(5.2)	0
chr16	11038500	11282500	244	16p13.13	0.41	AC007014.1,CLEC16A,RP11-66H6.3	S1(5.4)	0
chr2	133174500	133418098	244	2q21.2	0.091	AC104405.1,GPR39,LYPD1,RN7SKP103,YBX1P7	S3(3.3)	0
chr17	75276650	75520500	244	17q25.2-3	1.383	MIR4316,RP11-285E9.6,RP11-75C10.7,RP11-75C10.9,RP11-936I5.1,SEPT9,Y_RNA:234	S1(5.2)	0
chr19	4969124	5213500	244	19p13.3	0.39	CTC-482H14.5,KDM4B,PTPRS	G1(5.5)	0
chr1	46268500	46512489	244	1p34.1	0.913	MAST2,PIK3R3,TMA16P2	S1(5)	0
chr9	107446500	107690500	244	9q31.1	0.225	ABCA1,NIPSNAP3A,NIPSNAP3B,OR13D1,OR13D3P,RP11-217B7.2	S1(4.6)	0
chr6	106531500	106774500	243	6q21	1.055	ATG5,PRDM1,RN7SL47P,RNU6-344P,RP1-134E15.3	S1(5.2)	0
chr10	49621500	49864500	243	10q11.22	1.422	ARHGAP22,ARHGAP22-IT1,MAPK8,RP11-534L6.5,RP11-541M12.3	S2(3.9)	0
chr14	55033814	55276500	243	14q22.2	3.678	SAMD4A	S1(5.2)	0.47		1			1
chr11	103488500	103731500	243	11q22.3	0.019	MIR4693,RP11-563P16.1	S2(4.4)	0.236		1			1
chr13	49549500	49791500	242	13q14.2	1.757	COX7CP1,FNDC3A,OGFOD1P1,RAD17P2,RNU6-60P,RNY3P2	S1(4.7)	0
chr6	7861500	8103500	242	6p24.3	0.543	BLOC1S5,BLOC1S5-TXNDC5,BMP6,EEF1E1,EEF1E1-BLOC1S5,PIP5K1P1,RP1-303A1.1,TXNDC5	S3(3.3)	0
chr6	136871957	137113500	242	6q23.3	0.33	MAP3K5,RNA5SP219,RP3-325F22.3,RP3-325F22.5	S2(3.6)	0
chr6	17746500	17988500	242	6p22.3	2.095	AL023807.1,KIF13A,RP3-525L6.2	S1(5.1)	0
chr1	232523500	232765500	242	1q42.2	0.538	SIPA1L2	S3(3.2)	0
chr2	67669500	67911209	242	2p14	0.043	AC007422.1,AC010987.5	S1(4.5)	0
chr8	69537500	69779500	242	8q13.2	0.083	C8orf34,RNA5SP269,RP11-865I6.2	S2(4.1)	0
chrX	22050558	22291064	241	Xp22.11	0.075	PHEX,PHEX-AS1,RN7SL436P,RP11-40F8.2	S2(3.7)	0
chr2	238536500	238777500	241	2q37.3	1.239	LRRFIP1,RAMP1,RBM44	S1(5.4)	0
chr8	9412500	9653500	241	8p23.1	1.574	MIR597,RP11-1081K18.1,RP11-375N15.2,TNKS	S3(2.6)	0
chr2	102309500	102550500	241	2q11.2	5.309	FLJ20373,MAP4K4	S1(4.7)	0
chr2	187221500	187461500	240	2q32.1	0.094	AC018867.1,AC018867.2,DPRXP1,ITGAV,MED28P3,ZC3H15	S2(4.4)	0.265	1				1
chr15	49446500	49686500	240	15q21.1-2	0.784	COPS2,FAM227B,GALK2,MIR4716,NDUFAF4P1,RN7SL307P,RP11-295H24.3,RP11-325E5.4	S1(4.9)	0
chr1	144835867	145076186	240	1q21.1	1.715	AL138796.1,AL590452.1,PDE4DIP,RN7SKP88,RNU2-38P,RP11-326G21.1,RP4-791M13.4,RP4-791M13.5	S1(5.4)	0
chr8	6263500	6503575	240	8p23.1	0.522	ANGPT2,CTD-2541M15.1,CTD-2541M15.3,MCPH1,RP11-115C21.2,RP11-115C21.4	S2(3.9)	0
chr1	155293967	155532500	239	1q22	1.334	ASH1L,ASH1L-AS1,ASH1L-IT1,MIR555,POU5F1P4,RNU6-106P,RNU6-1297P,RUSC1,snoU13:194	G1(5.6)	0
chr11	3876500	4115936	239	11p15.4	0.496	AC090587.4,AC090587.5,AC090804.1,HNRNPA1P76,MIR4687,RP11-438N5.2,RP11-438N5.4,RPS29P20,SNORA7:1,STIM1	S1(4.9)	0
chr2	53848500	54087297	239	2p16.2	0.558	AC008064.1,ASB3,CHAC2,ERLEC1,GPR75,GPR75-ASB3,MIR3682,snoU13:269	S2(4)	0
chr12	42631500	42870500	239	12q12	0.744	PPHLN1,PRICKLE1,RN7SL10P,RNU6-249P,RP11-328C8.2,RP11-328C8.4,RP11-76E16.2,SNORA74:3,YAF2,Y_RNA:87,ZCRB1	S3(3.4)	0
chr7	91272827	91510500	238	7q21.2	0.176	MTERF	S2(3.5)	0
chr22	43173302	43411151	238	22q13.2	1.051	AL049758.2,ARFGAP3,GOLGA2P4,PACSIN2	G1(5.5)	0.163		1			1
chr3	109128500	109366953	238	3q13.13	0.225	AC092905.1,H3F3AP3,MIR4445,PPIAP15,RP11-702L6.4	S4(2.2)	0
chr4	152009500	152247500	238	4q31.3	0.759	PRSS48,RNU6-1282P,RP11-372K14.2,RP11-731D1.1,RP11-731D1.3,RPS3A,SH3D19,SNORD73,SNORD73A	S2(3.7)	0
chr6	83903655	84141500	238	6q14.2	0.392	AL391416.1,ME1,RP11-378G13.2,RWDD2A	S3(3.4)	0
chr2	203241658	203479575	238	2q33.1-2	1.158	AC009960.1,AC073410.1,BMPR2,RP11-27M5.1	S1(5.1)	0
chr6	108615500	108853500	238	6q21	0.232	LACE1,RNU6-770P,RP1-128O3.6,RP11-72I2.1,RP3-466I7.1	S2(3.9)	0
chr8	13136500	13373500	237	8p22	0.285	DLC1,MTND4P7,RP11-10C8.2	S1(5.2)	0
chr10	86083500	86320198	237	10q23.1	2.348	CACYBPP1,CCSER2,RPL12P29,TNPO1P1	S2(3.7)	0
chr12	118573831	118810750	237	12q24.23	1.167	AC026366.1,PEBP1,RPS2P5,TAOK3	S2(3.6)	0
chr21	32483500	32719500	236	21q22.11	0.098	TIAM1	S4(2.4)	0
chr7	156450387	156686500	236	7q36.3	0.622	LMBR1,RNF32,RNU4-31P	S3(3.1)	0
chr3	105084500	105320500	236	3q13.11	4.276	ALCAM	S2(4)	0
chr9	94476500	94712500	236	9q22.31	0.026	ROR2	S2(4.4)	0
chr3	16319500	16555500	236	3p24-25	1.552	OXNAD1,RFTN1,RP11-415F23.2,RP11-415F23.3,RP11-415F23.4	S1(5.3)	0
chr16	85391068	85625871	235	16q24.1	0.567	AC092377.1,RP11-118F19.1,RP11-680G10.1	G1(5.6)	0
chr13	76210500	76445186	235	13q22.2	17.862	FAM204CP,LMO7,RP11-29G8.3	S1(4.9)	0.171		1			1
chr15	64752940	64987239	234	15q22.31	0.994	GAPDHP61,OAZ2,RNU6-549P,RP11-330L19.1,RP11-330L19.2,RP11-702L15.4,Y_RNA:175,ZNF609	S1(5.3)	0
chr1	64936500	65170500	234	1p31.3	0.218	CACHD1,MIR4794	S2(3.5)	0
chr12	45604500	45838548	234	12q12	1.405	ANO6,PLEKHA8P1	S3(3.3)	0
chr1	214491500	214725500	234	1q32-41	4.337	KRT18P12,PTPN14,RP11-176D17.3,RP11-365D23.4,SMYD2	S1(5.4)	0
chr18	12424500	12658133	234	18p11.21	1.545	AP001029.1,AP005482.1,RP11-861E21.1,RP11-861E21.2,RP11-861E21.3,SLMO1,SPIRE1,snoU13:153	S1(5.1)	0
chr1	53970500	54204500	234	1p32.3	0.423	GLIS1,RNU7-95P	S1(5.2)	0
chr6	140751500	140985500	234	6q24.1	0.101	AL356137.1	S2(4.2)	0
chr10	117800500	118034500	234	10q25.3	0.413	GFRA1	S4(2.4)	0
chr9	113108500	113342160	234	9q31.3	0.51	RNU6-1039P,RNU6-124P,SVEP1	S1(5.2)	0
chr18	38978500	39212500	234	18q12.3	0.072	RP11-142I20.1	S4(2.2)	0
chr6	42185603	42419500	234	6p21.1	0.882	TRERF1,U3:61	S1(5.3)	0
chr2	159313500	159547500	234	2q24.1	1.444	AC005042.2,AC005042.4,AC005042.5,PKP4,snoZ5	S2(3.5)	0
chr15	63893788	64126500	233	15q22.31	1.265	FBXL22,HERC1,RP11-317G6.1	S1(5.2)	0
chr4	87515500	87748500	233	4q21.3	0.617	PTPN13,SLC10A6	S1(4.7)	0
chr16	27560500	27793500	233	16p12.1	0.302	AC002551.1,AC016597.1,CTD-2049O4.1,GTF3C1,KIAA0556,Y_RNA:207	S2(3.8)	0
chr14	45605142	45838417	233	14q21.2	0.09	DNAJC19P9,FANCM,MIS18BP1,RNU6-552P	S3(3.1)	0
chr5	96840399	97073597	233	5q15	0.045	RP11-1E3.1,RP11-72K17.2	S3(3.3)	0
chr13	100229365	100462500	233	13q32.3	0.027	CFL1P8,CLYBL,CLYBL-AS1,CLYBL-AS2,LINC01039,MIR4306,SNORA25:4,snoU13:68	S2(3.5)	0
chr1	77520500	77753500	233	1p31.1	0.206	AK5,PIGK,RP11-363H12.1,RP4-564M11.2,RP4-706A16.3,ST6GALNAC5	S1(4.7)	0
chr10	21807500	22040500	233	10p12.31	2.667	HNRNPRP1,MLLT10,RNU6-1141P,RNU6-306P,SKIDA1	S2(4.4)	0
chr18	71126500	71359500	233	18q22.3	0.025		S2(3.7)	0
chr12	65672422	65905500	233	12q14.3	2.17	KRT18P60,MSRB3,RP11-230G5.2,RP11-305O6.3	G1(5.5)	0
chr18	64920500	65152203	232	18q22.1	0.249	AC091042.1,CTD-2541J13.1,RP11-563H6.1	S2(4)	0
chr5	92687500	92919500	232	5q15	0.781	NR2F1,NR2F1-AS1	S2(4.2)	0
chr10	126248500	126480500	232	10q26.13	0.4	FAM53B,LHPP,METTL10,RP11-12J10.3,RP11-464O2.2,Y_RNA:4	S1(4.8)	0
chr9	128509500	128741500	232	9q33.3	2.514	PBX3	S1(4.5)	0
chr5	63461500	63693500	232	5q12.3	0.088	RNF180	S4(2.4)	0
chr4	87855500	88087995	232	4q21-22	1.056	AFF1,C4orf36,KLHL8,TECRP1	S1(4.9)	0
chr3	155149500	155381500	232	3q25.31	0.017	Metazoa_SRP:7,PLCH1,PLCH1-AS1,PLCH1-AS2,RP11-639F1.3,RPL6P7	S3(3.4)	0
chr3	55088500	55320500	232	3p14.3	0.028	CACNA2D3,RP11-889D3.1,RP11-889D3.2	S1(4.9)	0
chr13	75825500	76057500	232	13q22.2	0.41	LINC01078,TBC1D4,TBC1D4-AS1	S1(4.7)	0
chr8	122907500	123139423	232	8q24.13	0.062	MRPS36P3,RP11-398G24.2,RP11-785H20.1	S1(4.9)	0
chr3	141637500	141868386	231	3q23	0.35	ATP1B3,ATP1B3-AS1,RNU6-425P,RP11-271K21.11,RP11-343B5.1,TFDP2	S1(4.6)	0
chr2	54684500	54915500	231	2p16.2	3.336	AC092839.1,AC092839.3,AC092839.4,AC093110.3,SPTBN1	S1(4.9)	0
chr2	3151500	3382500	231	2p25.3	0.348	AC019118.4,TSSC1,TSSC1-IT1	S2(3.6)	0
chr18	39534500	39765500	231	18q12.3	1.228	LINC00907,PIK3C3,RP11-115N12.1	S3(3)	0
chr4	99181500	99411500	230	4q23	1.136	RAP1GDS1,RP11-323J4.1,RP11-810D13.1,TSPAN5	S2(4.3)	0
chr2	56411500	56641500	230	2p16.1	1.217	AC007743.1,CCDC85A,RNA5SP93,RP11-482H16.1	S3(2.7)	0
chr4	129785500	130015500	230	4q28.2	0.51	C4orf33,PHF17,SCLT1	S3(3)	0
chr7	140396877	140625500	229	7q34	1.119	BRAF,NDUFB2,U6:11	S2(4.1)	0
chr17	295730	624957	229	17p13.3	0.89	RP11-411G7.2,RP5-1029F21.2,RP5-1029F21.3,RP5-1029F21.4,RPS4XP17,VPS53	S1(5.2)	0
chr7	84122040	84351500	229	7q21.11	0.113	AC003984.1,AC092022.1,RPL7P30	S2(4.3)	0
chr16	80608500	80837500	229	16q23.2	0.41	AC092332.1,CDYL2,CTD-2055G21.1,RP11-18F14.4	S3(3.2)	0
chr2	186718500	186947960	229	2q32.1	0.062	AC097500.2,RPL21P32	S4(2.2)	0
chr6	135590500	135819500	229	6q23.3	0.522	AHI1,LINC00271,RP3-388E23.2,Y_RNA:636	S2(4.3)	0
chr9	81627500	81856500	229	9q21.31	0.101	KRT18P24,RP11-165H23.1	S1(4.6)	0
chr5	60628500	60857500	229	5q12.1	2.217	AC008836.1,RP11-631M6.2,RP11-631M6.3,RPL3P6,ZSWIM6	S1(4.7)	0
chr1	235817500	236046940	229	1q42.3	0.948	LDHAP2,LYST,LYST-AS1,MIR1537,RNU5E-2P	S1(5.2)	0
chr14	71374500	71602500	228	14q24.2	2.532	PCNX,PTTG4P,RP5-1163L11.2,RP5-1163L11.3	S1(4.9)	0
chr8	90769955	90997500	228	8q21.3	0.397	COX6B1P6,NBN,OSGIN2,RIPK2,RNU6-925P	S1(5.4)	0
chr6	166813500	167041500	228	6q27	0.511	FAM103A2P,MIR1913,RPS6KA2,RPS6KA2-IT1,Z98049.1	S3(3)	0
chr5	140710251	140937877	228	5q31.3	0.578	DIAPH1,PCDHGA1,PCDHGA10,PCDHGA11,PCDHGA12,PCDHGA2,PCDHGA3,PCDHGA4,PCDHGA5,PCDHGA6,PCDHGA7,PCDHGA8,PCDHGA9,PCDHGB1,PCDHGB2,PCDHGB3,PCDHGB4,PCDHGB6,PCDHGB7,PCDHGB8P,PCDHGC3,PCDHGC4,PCDHGC5,RN7SL68P	S3(3.3)	0
chr11	46957500	47185500	228	11p11.2	0.367	C11orf49,CTD-2384B9.1,RP11-390K5.3	G1(5.6)	0
chr22	31089768	31317500	228	22q12.2	0.101	EIF4HP2,MIR3200,OSBP2	S1(4.9)	0
chr6	465500	693500	228	6p25.3	0.733	EXOC2,HUS1B,RP1-20B11.2,RP11-532F6.2	S3(3.2)	0
chrX	109245500	109473500	228	Xq23	0.165	AMMECR1,MIR3978,MIR652,SNORD96B,TMEM164	S1(4.6)	0
chr7	86461500	86689500	228	7q21.12	0.16	GRM3,KIAA1324L	S4(1.9)	0
chr1	44171494	44399500	228	1p34.1	0.708	ARTN,KDM4A-AS1,RNU6-1058P,RP11-184I16.3,RP11-184I16.4,SHMT1P1,ST3GAL3	G1(5.5)	0
chr4	95368500	95596395	228	4q22.3	7.298	AC109925.1,PDLIM5	S1(4.9)	0.871			1		1
chr4	7714500	7941500	227	4p16.1	3.438	AC097381.1,AFAP1,AFAP1-AS1,SORCS2	S1(5.4)	0.573	1				1
chr14	100203500	100430865	227	14q32.2	0.384	EML1,RNU1-47P	S1(5.4)	0
chr3	28389500	28616281	227	3p24.1	0.158	AC093142.2,AZI2,FAM96AP1,ZCWPW2	S4(2.3)	0
chr2	36583500	36810500	227	2p22.2-3	14.27	AC007401.2,CRIM1,FEZ2,RP11-78I14.1	S1(5.3)	0.491		3			3
chr18	43320500	43547240	227	18q12-21	2.276	EPG5,RP11-116O18.3,RP11-618K16.4,SIGLEC15,SLC14A1	G1(5.5)	0
chr12	51984500	52211682	227	12q13.13	2.125	AC068987.1,HNRNPA3P10,RP11-923I11.3,SCN8A	S1(5.1)	0
chr15	62127500	62353500	226	15q22.2	0.983	RN7SL613P,RP11-16B9.1,RP11-643M14.1,VPS13C	S3(3.1)	0
chr3	171305500	171531500	226	3q26.31	0.053	PLD1,PP13439,snoU13:290	S1(5.1)	0
chr22	31795508	32021500	226	22q12.2	0.391	DRG1,EIF4ENIF1,H2AFZP6,PISD,RNU6-28P,RP11-247I13.11,RP11-247I13.3,RP11-247I13.6,RP11-247I13.8,SFI1	S1(5.3)	0
chr15	96665500	96891500	226	15q26.2	0.116	AC016251.1,MIR1469,NR2F2,NR2F2-AS1,RP11-327J17.1,RP11-327J17.2	S2(3.6)	0
chr20	49953500	50179370	226	20q13.2	0.053	AL079339.1,MIR3194,NFATC2	S1(5.2)	0
chr1	52608500	52834348	226	1p32.3	0.648	ANAPC10P1,CC2D1B,DNAJC19P7,PDCL3P6,RN7SL788P,RP11-155O18.6,RP4-800M22.1,RP4-800M22.2,RP4-800M22.4,ZFYVE9	S1(5.3)	0
chr15	64455404	64681500	226	15q22.31	1.217	CSNK1G1,CTD-2116N17.1,KIAA0101,SNORA48:2,TRIP4	S1(5.4)	0
chr3	42054500	42279500	225	3p22.1	2.785	RNU4-78P,RP11-193I22.2,TPMTP2,TRAK1	S2(3.9)	0
chr1	230203500	230428500	225	1q42.13	1.311	GALNT2,RP5-956O18.2,RP5-956O18.3	S3(2.8)	0
chr4	100009500	100234500	225	4q23	0.075	ADH1A,ADH1B,ADH4,ADH5,ADH6,PCNAP1,RP11-696N14.1	S2(3.5)	0
chr4	80769500	80994500	225	4q21.21	1.993	ANTXR2,PCAT4	S1(4.7)	0
chr8	58906500	59131500	225	8q12.1	0.582	FAM110B,RP11-1112C15.2,RP11-648L3.1,RP11-648L3.2	S3(3)	0
chr7	26680500	26905500	225	7p15.2	0.545	C7orf71,SKAP2	S3(3.3)	0
chr3	16926500	17151500	225	3p24.3	0.28	MIR3714,PLCL2,PLCL2-AS1	S3(3.4)	0
chr15	71143500	71368500	225	15q23	0.144	KRT8P9,LARP6,LRRC49,RPL5P3,THAP10	G1(5.6)	0
chr10	115025500	115250500	225	10q25.3	0.025	RNU7-165P,RP11-481H12.1	S3(3.3)	0
chr11	17809500	18034500	225	11p15.1	0.177	RP1-59M18.2,SERGEF	S3(3.4)	0
chr21	35014500	35238500	224	21q22.11	1.315	AP000304.12,CRYZL1,ITSN1	S1(5)	0
chr12	120091500	120315500	224	12q24.23	0.704	CIT,MIR1178,PRKAB1,RP1-127H14.3,RP11-768F21.1	S2(4.1)	0
chr7	80325500	80549500	224	7q21.11	5.267	SEMA3C	S1(5)	0
chr8	77592500	77816826	224	8q21.11	1.6	ZFHX4,ZFHX4-AS1	S3(3.2)	0
chr1	208194500	208418500	224	1q32.2	0.412	PLXNA2	S2(4)	0
chr5	127195500	127419500	224	5q23.2-3	0.441	CTC-228N24.1,CTC-228N24.3,SLC12A2	S2(4.2)	0
chr6	34857041	35081500	224	6p21.31	0.361	ANKS1A,RP11-527B17.2	S1(5.3)	0
chr2	203879500	204103662	224	2q33.2	1.605	AC011737.2,AC023271.1,AC023271.2,NBEAL1,RPL7P14,SNORA1:4,WDR12	S1(4.8)	0
chr16	89333938	89556969	223	16q24.3	1.939	AC137932.1,AC137932.5,AC137932.6,ANKRD11,RNU6-430P,RP1-168P16.1,RP1-168P16.2,RP1-168P16.3	G1(5.5)	0
chr5	32709500	32932500	223	5p13.3	0.657	AC026703.1,AC026703.2,CTD-2066L21.3,CTD-2218G20.1,NPR3	S2(4.4)	0
chr2	150443500	150666500	223	2q23.2-3	0.044	AC007364.1,AC144449.1,MMADHC,RNU6-601P	S2(4.2)	0
chr17	44082500	44305500	223	17q21.31	2.455	KANSL1,KANSL1-AS1,MAPT,RNU7-101P,RP11-669E14.6,Y_RNA:245	S1(4.9)	0
chr7	38726637	38949500	223	7p14.1	0.538	VPS41	S4(2.4)	0
chr16	68056500	68279206	223	16q22.1	0.54	AC130462.1,DDX28,DUS2,ESRP2,NFATC3,RP11-67A1.2,RP11-96D1.10,RP11-96D1.11,RP11-96D1.5,RP11-96D1.6,RP11-96D1.9,RPS12P27,SNORA48:4,Y_RNA:214	G1(5.6)	0
chr1	176209500	176432306	223	1q25.2	0.13	MORF4L1P7,RNU2-12P,RP11-195C7.3,RP11-357J22.1	S4(2.1)	0
chr9	137533500	137756500	223	9q34.3	1.985	AL603650.1,AL603650.2,AL603650.3,AL603650.4,COL5A1,COL5A1-AS1,MIR3689A,MIR3689B,MIR3689C,MIR3689D1,MIR3689D2,MIR3689E,MIR3689F	S1(5)	0
chr9	2418500	2641395	223	9p24.2	0.06	RP11-125B21.2,RP11-91N2.3,VLDLR	S3(3)	0.132		1			1
chr2	230563500	230786500	223	2q36.3	2.679	AC007559.1,DNER,RNU6-613P,TRIP12	S3(3.2)	0
chr3	47622500	47845500	223	3p21.31	1.262	AC026318.1,DHX30,RP11-395P16.1,RP11-717D12.1,SMARCC1	S1(5.2)	0
chr6	2245500	2468500	223	6p25.2-3	0.139	AL031768.1,GMDS,GMDS-AS1,HMGN2P28,RP1-136B1.1	S2(3.8)	0
chr17	58247500	58469500	222	17q23.1-2	1.4	CA4,FAM106DP,RP11-3K24.1,RP11-3K24.2,SCARNA20:5,USP32	S1(5.3)	0
chrX	18444500	18666500	222	Xp22.13	0.186	CDKL5,GJA6P,RS1	S4(2.4)	0
chr9	134733500	134955500	222	9q34.13	1.01	MED27,RP11-32B11.2	S1(4.6)	0
chr1	178694500	178916500	222	1q25.2	2.436	ANGPTL1,PTPN2P1,RALGPS2,RP11-428K3.1,SNORA63:3	S1(5.2)	0
chr9	88134500	88356500	222	9q21.33	0.336	AGTPBP1	S4(2.2)	0
chr9	97858500	98080500	222	9q22.32	0.298	FANCC,RNA5SP288,RP11-173G21.1,RP11-80I15.1,RP11-80I15.4,snoU13:448	S2(4.3)	0
chr8	48651648	48873500	222	8q11.21	1.304	AC103686.1,MCM4,PRKDC,Y_RNA:723	S1(4.7)	0
chr2	161128391	161350500	222	2q24.2	6.664	ITGB6,MIR4785,RBMS1,RMRPP3	S1(4.7)	0
chr2	12837500	13059500	222	2p24.3	0.086	MIR3125,RP11-333O1.1,TRIB2	S2(4.1)	0
chr12	31522235	31744031	222	12p11.21	0.572	DENND5B,DENND5B-AS1,RNU6-618P,RP11-820K3.2,RP11-820K3.3,RP11-820K3.4,Y_RNA:108,snoU13:47	S2(3.9)	0
chr13	45693500	45914173	221	13q14.12-13	1.161	7SK:1,AL138963.1,GTF2F2,KCTD4,RNU6-69P,RP11-290D2.5,SNORA31:4,SNORA31:5,TPT1	S1(5.4)	0
chr3	170136652	170357500	221	3q26.2	0.311	CLDN11,KRT8P13,SLC7A14	G1(5.5)	0
chr5	66254500	66475500	221	5q12.3	0.349	CTD-2306M10.1,MAST4,MAST4-AS1	S3(3.3)	0
chr1	179334854	179555500	221	1q25.2	0.06	AL160286.1,AXDND1,HNRNPA1P54,MEF2AP1,NPHS2,RNU5F-2P,RP11-545A16.1	S2(4)	0
chr20	40026500	40247500	221	20q12	1.089	CHD6,RP4-620E11.4,RPL12P11	S1(5.1)	0
chr15	67546500	67767500	221	15q23	0.054	AAGAB,IQCH,IQCH-AS1	S1(5)	0
chr1	65886247	66107500	221	1p31.3	0.212	LEPR,LEPROT,RP11-430H12.2,RP4-630A11.3,snoU13:188	S2(3.5)	0
chr7	106191500	106411500	220	7q22.3	0.126	AC004917.1,CCDC71L,CTB-111H14.1,CTB-30L5.1	S1(4.8)	0
chrX	117630500	117850500	220	Xq24	0.236	DOCK11,RBBP8P1,Y_RNA:790	S1(4.6)	0
chr8	70377500	70597500	220	8q13.2-3	10.081	SLCO5A1,SULF1	S3(3.4)	0
chr19	7074500	7294500	220	19p13.2	0.187	AC010311.1,CTB-25J19.9,INSR,ZNF557	S3(3.2)	0
chr1	66998500	67218141	220	1p31.3	1.439	AL139147.1,AL354978.1,MIR3117,SGIP1	S1(5.1)	0
chr5	78590500	78810500	220	5q14.1	0.318	HOMER1,JMY,RP11-342F17.1	S2(3.5)	0
chr10	31608500	31828500	220	10p11.22	3.294	RP11-192P3.5,SPTLC1P1,ZEB1,ZEB1-AS1	S1(4.9)	0
chr3	69216500	69435500	219	3p14.1	0.064	FRMD4B	S3(3.4)	0
chr18	67410500	67629039	219	18q22.2	0.214	CD226,DOK6	S3(3.2)	0
chr2	165478358	165697500	219	2q24.3	0.54	AC019181.2,AC019181.3,COBLL1,SNORA70F	S3(3.3)	0
chr1	41488909	41707500	219	1p34.2	0.834	RP4-635E8.1,SCMH1	S1(4.8)	0
chr11	34160500	34379500	219	11p13	0.476	ABTB2,NAT10,RP1-145M24.1,Y_RNA:46	S1(4.8)	0
chr15	28353500	28572500	219	15q13.1	0.746	HERC2,RPL41P2	S4(2.3)	0
chr8	32405500	32623642	218	8p12	3.267	NRG1	S2(4.4)	0
chr2	189826500	190044605	218	2q32.2	3.597	AC133106.2,COL3A1,COL5A2,MIR1245A,MIR3129	S1(5.4)	0
chr6	71912500	72130500	218	6q13	0.368	LINC00472,MIR30A,MIR30C2,OGFRL1,RP11-154D6.1,RP3-331H24.4,RP3-331H24.5	S1(4.7)	0
chr6	158733691	158951500	218	6q25.3	0.722	CACYBPP3,RN7SL173P,RP11-732M18.2,TULP4	S1(5.2)	0
chr14	91308500	91526500	218	14q32.11	0.024	RPS6KA5	S3(3.3)	0
chr4	177713881	177931500	218	4q34.3	0.04	RP11-624A4.1,RP11-765K14.1	S1(5.4)	0
chr4	114683083	114901500	218	4q26	1.866	ARSJ,RP11-26P13.2,RP11-397D21.1	S1(5.1)	0
chr13	42614500	42832500	218	13q14.11	1.043	AL139328.1,CHCHD2P11,DGKH,FHP1,MAPK6PS3,RP11-187A9.3	S1(4.9)	0
chr10	103113500	103330316	217	10q24.32	0.884	BTRC,RNU2-59P,snoU13:12	S1(4.6)	0
chr2	175652656	175870097	217	2q31.1	0.498	CHN1,Y_RNA:419	S1(5.3)	0
chr13	33160500	33377500	217	13q13.1	1.151	PDS5B,RNY1P4	S2(4.4)	0
chr3	11544500	11761500	217	3p25.3	1.406	ATG7,RP11-169K17.2,RP11-169K17.3,RP11-169K17.4,VGLL4	S1(5.1)	0
chr15	56535500	56752500	217	15q21.3	0.052	MNS1,RNU6-1287P,RP11-48G14.1,RP11-48G14.2,RP11-844G16.1,TEX9	S2(3.7)	0
chrX	140344500	140561500	217	Xq27.2	0.03	GS1-164F24.1,RBMX2P2	G2(1.3)	0
chr1	71547006	71764500	217	1p31.1	0.029	AL360297.1,RP11-386O9.2,ZRANB2-AS2	S4(2.4)	0
chr20	53091500	53308500	217	20q13.2	0.498	DOK5	S4(2.2)	0
chr5	60240500	60457896	217	5q12.1	0.797	AC008498.1,ERCC8,NDUFAF2,SMIM15	S2(4.1)	0
chr2	32048505	32265500	217	2p22-23	1.399	AK2P2,AL121652.1,CTC-336P14.1,DPY30,MEMO1,RP11-1057B6.1	S2(4.1)	0
chr7	5603415	5820500	217	7p22.1	1.053	FSCN1,RNF216,RNF216-IT1	G1(5.6)	0
chr17	15903031	16119500	216	17p11-12	1.787	AC002553.1,AC002553.4,NCOR1,RN7SL442P,RNU6-314P,RNU6-862P,RPLP1P11,TTC19	S1(4.9)	0
chr6	86137684	86353510	216	6q14.3	1.969	NT5E,RP1-3J17.3,RP11-321N4.5,SNX14,SYNCRIP	G1(5.5)	0.15		1			1
chr16	14165500	14381500	216	16p13.12	0.334	AC040173.1,CTA-276F8.2,MKL2,TVP23CP2,Y_RNA:195	S1(4.8)	0
chr4	108425500	108641500	216	4q25	0.474	PAPSS1	S3(2.7)	0
chr16	52829500	53045198	216	16q12.2	0.074	RP11-467J12.1,RP11-467J12.2,RP11-467J12.3	S4(2.4)	0
chr5	78065844	78281910	216	5q14.1	0.963	ARSB	S1(5)	0
chrX	83541500	83757500	216	Xq21.1	0.21	HDX,RP11-74B21.1,RP6-33F8.1	S4(2.2)	0
chr21	17102500	17318500	216	21q21.1	1.217	RBPMSLP,USP25	S3(3.3)	0
chr5	156787500	157003500	216	5q33.3	0.291	AC106801.1,ADAM19,CTB-109A12.1,CTB-47B11.1,CTB-47B11.3,CYFIP2,NIPAL4	S1(5)	0
chr15	35461899	35677500	216	15q14	0.182	ANP32AP1,DPH6,MIR3942,RP11-150L8.3,RP11-150L8.4	S2(3.9)	0
chr12	3186500	3401500	215	12p13.32-33	0.14	RP11-543P15.1,TSPAN9,TSPAN9-IT1	S1(5.1)	0
chr1	167190500	167405500	215	1q24.1-2	0.642	CD247,POU2F1,RP11-52A20.2	S3(2.7)	0
chr16	14512729	14727500	215	16p13.12	0.723	AC092291.1,AC092291.2,BFAR,PARN,RN7SL274P	S1(5)	0
chr16	16043500	16258500	215	16p13.11	1.181	ABCC1,ABCC6,RPL17P40	S1(5.4)	0
chr4	153242196	153457500	215	4q31.3	1.284	FBXW7,MIR3140,MIR4453,RP11-461L13.2	S3(3.4)	0
chr4	123072500	123287500	215	4q27	1.128	KIAA1109	S2(4)	0
chr4	150999500	151214500	215	4q31.23-3	1.42	DCLK2,LRBA,RNU7-194P	S1(5.1)	0
chr3	110790500	111004500	214	3q13.13	1.962	PVRL3	S2(3.9)	0
chr5	65221500	65435798	214	5q12.3	8.028	ERBB2IP,SNORA76:4	S1(5.4)	0.208		1			1
chr22	46067500	46281500	214	22q13.31	2.85	ATXN10,MIR4762,RP1-37M3.8,WI2-85898F10.1	S1(5.4)	0
chr15	37179236	37393500	214	15q14	4.564	MEIS2,RP11-128A17.1,Y_RNA:181	S2(4.4)	0
chr2	215673500	215887283	214	2q35	0.052	ABCA12,AC016708.2,AC072062.1,AC072062.3,BARD1,SNORA70:15	S3(2.5)	0
chr9	2017500	2231500	214	9p24.2-3	0.931	RN7SL592P,RNU2-25P,RP11-264I13.2,SMARCA2	S3(2.5)	1		1			1
chr14	92980500	93194500	214	14q32.12	0.463	LGMN,RIN3	S1(4.7)	0
chr10	22789500	23003500	214	10p12.2	1.267	PIP4K2A	S3(3.2)	0
chr3	106781500	106995500	214	3q13.12	0.031	LINC00882,LINC00883,RP11-446H18.5,RP11-561O4.1	S2(3.8)	0
chr8	30241500	30454430	213	8p12	4.673	GTF2E2,RBPMS,RBPMS-AS1	S1(5.1)	0
chr10	94608500	94821500	213	10q23.33	0.078	CYP26C1,EXOC6,RP11-348J12.2,RP11-477L16.2	S1(5)	0
chr6	112408732	112621500	213	6q21	2.606	FAM229B,LAMA4,RNU6-1226P,RP1-142L7.5,RP1-142L7.8,RP1-142L7.9,RP11-506B6.6	S1(5.2)	0
chr8	77317500	77530500	213	8q21.11	0.11	MRPL9P1,RP11-115I9.1,RP11-706J10.1,RP11-706J10.3,ZFHX4-AS1	S2(3.9)	0
chr13	110959500	111172500	213	13q34	0.878	COL4A2,COL4A2-AS1,COL4A2-AS2,snoU13:61	S1(5)	0
chr1	184731500	184944500	213	1q25.3	0.329	FAM129A,RNU7-13P	S1(4.6)	0
chr7	139240500	139477500	212	7q34	1.842	HIPK2,TBXAS1	S1(4.6)	0
chr8	69900500	70112500	212	8q13.2	0.149	GS1-44D20.1,RNU7-102P,RP11-21C17.1,RP11-600K15.1	S2(4.1)	0
chr4	77866500	78078303	212	4q21.1	6.481	CCNI,RNU6-1187P,RP11-123J14.2,RP11-1E1.1,RP11-1E1.2,SEPT11	S1(4.6)	0
chr3	178578193	178790500	212	3q26.32	0.569	ZMAT3	S3(3.3)	0
chr14	51906500	52118500	212	14q22.1	0.434	FRMD6,FRMD6-AS2,RNU6-1033P,RNU6-1291P	G1(5.7)	0
chr18	20807500	21019500	212	18q11.2	0.179	CABLES1,RP11-17J14.2,TMEM241	S1(5.2)	0
chr1	87380500	87592500	212	1p22.3	0.334	HS2ST1,RP11-384B12.2,RP11-384B12.3,RP4-604K5.2,RP4-604K5.3,RP5-1052I5.2	S2(4)	0
chr12	76742222	76954500	212	12q21.2	1.917	OSBPL8	S1(5)	0
chr2	172967733	173180014	212	2q31.1	0.017	AC104801.1,snoU13:259	G1(5.5)	0
chr10	103603677	103815950	212	10q24.32	0.901	C10orf76,Y_RNA:20	G1(5.6)	0
chr11	77918500	78129394	211	11q14.1	0.456	GAB2,RP11-452H21.1,RP11-452H21.2,USP35	S1(5)	0
chr2	138835500	139046363	211	2q22.1	0.031	AC069394.1,AC097523.1,AC097523.2	S3(2.6)	0
chr7	75157478	75368500	211	7q11.23	0.781	HIP1,RN7SL642P	G1(5.6)	0
chr1	217594500	217805500	211	1q41	1.098	GPATCH2,RP11-361K17.2,SPATA17	S4(2.2)	0
chr2	136288500	136499188	211	2q21.3	0.623	MIR128-1,R3HDM1,RNU6-512P,ZRANB3	S2(4.1)	0
chr3	122785500	122996199	211	3q21.1	1.065	PDIA5,SEC22A	S2(4.3)	0.264			1		1
chr7	17769500	17980500	211	7p21.1	1.061	SNX13	S2(3.7)	0
chr3	72936500	73147500	211	3p13	0.717	EBLN2,FTH1P23,GXYLT2,PPP4R2,RNU6-557P,RNU7-19P,snoU13:299	S2(4)	0
chr21	30047170	30258500	211	21q21.3	0.04	N6AMT1,RNU6-872P	S1(4.8)	0
chr4	17812381	18023500	211	4p15.31	0.501	KRT18P63,LCORL,NCAPG	S3(2.8)	0
chrX	7895500	8106500	211	Xp22.31	0.022	MIR651,PNPLA4,RP11-692P14.1	S4(1.7)	0
chr10	76586500	76797500	211	10q22.2	1.149	KAT6B,RP11-77G23.2,RP11-77G23.5	S1(5.2)	0
chrX	16521500	16731500	210	Xp22.2	0.176	CTPS2,MIR548AM,RN7SL658P,S100G	S1(4.6)	0
chr3	132231500	132441500	210	3q22.1	0.526	ACAD11,ACKR4,DNAJC13,HSPA8P19,NPHP3,NPHP3-AS1,UBA5	S1(5.1)	0
chr8	95907994	96117500	210	8q22.1	0.141	CCNE2,MIR3150B,NDUFAF6,RNU6-1209P,RP11-320N21.2,RP11-347C18.3,RP11-347C18.4,TP53INP1,snoU13:429	S1(4.8)	0
chr2	32853098	33063500	210	2p22.3	0.687	LINC00486,MIR4765,TTC27	S1(4.9)	0
chr16	15527500	15737123	210	16p13.11	1.911	C16orf45,CTB-193M12.1,KIAA0430,RP11-1021N1.1	S1(4.9)	0
chr6	143056500	143266500	210	6q24.2	2.656	HIVEP2,RP1-67K17.3,RP1-67K17.4	S2(4.2)	0
chr7	24809244	25019500	210	7p15.3	1.967	AC004016.1,AC004016.2,OSBPL3	S1(5.1)	0
chr9	125703111	125913500	210	9q33.2-3	0.937	GPR21,MIR600HG,RABGAP1,RP11-123N4.4,RP11-355O1.7,STRBP,Y_RNA:750	S2(3.7)	0
chr7	134985500	135195500	210	7q33	1.158	CNOT4,SDHDP2	S2(4.3)	0
chr20	36321500	36531498	210	20q11.23	0.637	CTNNBL1	S1(4.6)	0
chr17	59731500	59940882	209	17q23.2	0.469	BRIP1	S1(4.7)	0
chr6	136662500	136871957	209	6q23.3	0.028	7SK:5,MAP7,NDUFS5P1,RP3-325F22.5,RP3-406A7.3,RP3-406A7.5	S2(4.1)	0
chr7	50652500	50861500	209	7p12.1	1.224	GRB10	S3(3)	0
chr14	39735500	39944043	209	14q21.1	0.429	AL157791.1,CTAGE5,FBXO33,RP11-1074O12.1,RP11-407N17.3,RP11-407N17.5,RP11-647O20.1	S2(4.3)	0
chr4	119756500	119965500	209	4q26	0.184	RP11-358D17.1,SEC24D,SYNPO2	G1(5.5)	0
chr20	10414500	10623500	209	20p12.2	0.336	JAG1,MKKS,RP5-1099D15.1,SLX4IP	S2(4)	0
chr2	192109500	192318500	209	2q32.3	4.711	AC092614.2,MYO1B,RNU6-1045P	S1(5.3)	0
chr7	128865500	129074273	209	7q32.1	0.304	AHCYL2,RNU7-16P,RP11-305M3.2	S1(5)	0
chr4	4543500	4752500	209	4p16.2	0.045	STX18,STX18-AS1	S1(4.5)	0
chr2	39456729	39664500	208	2p22.1	2.044	AC007246.3,MAP4K3,RNU6-1185P,RP11-449G16.1,SNORA67:4	S1(5.1)	0.539		1			1
chr6	121755500	121963500	208	6q22.31	0.472	GJA1,RNU2-8P,RNU4-35P,RNU4-76P,RP1-172I22.1,RP11-129H15.1	S2(4.2)	0
chr2	178050500	178258500	208	2q31.2	0.917	AC019080.1,AC074286.1,AC079305.10,AC079305.8,AGPS,DNAJC19P5,HNRNPA3,KRT8P40,MIR3128,MIR4444-1:1,NFE2L2,RP11-337N6.1,RP11-337N6.2,Y_RNA:420,snoU13:260	S1(4.6)	0
chr4	40424500	40632500	208	4p14	0.027	AC098869.1,MIR4802,RBM47,RP11-588L15.1,RP11-588L15.2	S2(4.1)	0
chr3	150056500	150264500	208	3q25.1	0.277	EIF2A,SERP1,TSC22D2	G1(5.5)	0
chr3	194783500	194991896	208	3q29	0.397	MIR3137,RN7SL36P,RNU6-25P,XXYLT1,XXYLT1-AS1,XXYLT1-AS2	S2(4.1)	0
chr9	12773500	12981500	208	9p23	1.356	LURAP1L,RP11-3L8.3,TDPX2,Y_RNA:734	S2(3.6)	0
chr18	55861500	56069500	208	18q21.31	0.22	NEDD4L,RP11-718I15.1,RP11-845C23.2,RP11-845C23.3	S1(5.1)	0
chr13	51818500	52026500	208	13q14.3	0.959	FAM124A,INTS6,MIR5693,RP11-24B19.3,RP11-24B19.4,SERPINE3	S1(4.7)	0
chr3	39889500	40097500	208	3p22.1	0.038	MYRIP,RNU4-56P	S3(2.5)	0
chr10	7860466	8068500	208	10p14	0.455	RP11-401E9.3,TAF3	S3(3.3)	0
chr8	136469500	136677500	208	8q24.23	0.594	KHDRBS3,MAPRE1P1	S4(2.2)	0
chr3	184999500	185207500	208	3q27.2	0.248	EHHADH,MAP3K13,RPL4P4,TMEM41A,snoU13:292	S2(4.1)	0
chr16	69165193	69373332	208	16q22.1	0.823	CHTF8,CIRH1A,COG8,PDF,RNU6-22P,RP11-343C2.11,RP11-343C2.12,RP11-343C2.7,RP11-343C2.9,RP11-70O5.2,SNTB2,VPS4A,Y_RNA:203	G1(5.6)	0
chr20	35517500	35724500	207	20q11.23	0.269	RBL1:1,RBL1:2,RPS27AP3,RPS3AP3,SAMHD1,TLDC2	S1(5.3)	0
chr14	61928500	62135500	207	14q23.1-2	0.043	PRKCH,RP11-47I22.1,RP11-47I22.2,RP11-47I22.3,RP11-47I22.4	G1(5.6)	0
chrX	64807500	65014186	207	Xq12	2.979	MSN,NANOGP9	S2(4.3)	0
chr15	70848500	71055932	207	15q23	1.965	RP11-138H8.2,RP11-64K10.1,UACA	G1(5.6)	1		1			1
chr4	22311500	22518500	207	4p15.2	0.146	GPR125,RP11-17E2.2,snoU13:316	S4(2.3)	0
chr8	68048146	68255500	207	8q13.2	1.614	ARFGEF1,CSPP1	S3(3)	0
chr11	94439500	94646211	207	11q21	1.264	AMOTL1,RP11-856F16.2,RP11-867G2.8	S1(4.8)	0
chr8	110140500	110347500	207	8q23.1	0.427	ENY2,NUDCD1,RP11-122A21.2	G2(1.3)	0
chr2	69664760	69871500	207	2p13.3	1.82	AAK1,AC092431.2,RN7SL604P,RP11-427H3.3,RP11-77O7.1,SNORA36C	G1(5.6)	0
chr20	47237500	47444500	207	20q13.13	0.046	AL035106.1,PREX1	S2(4.4)	0
chr6	35888500	36095585	207	6p21.31	0.624	DPRXP2,MAPK14,RP1-179N16.3,SLC26A8,SRPK1	S1(4.9)	0
chr4	189320500	189526500	206	4q35.2	0.077	LINC01060	S4(2.2)	0
chr4	139892500	140098500	206	4q31.1	0.581	AC093602.1,CCRN4L,ELF2,PPP1R14BP3,RN7SL382P,RNU6-531P,RP11-371F15.3	S1(5)	0
chr9	114937688	115143500	206	9q32	1.649	HSDL2,PTBP3,RN7SL430P,RN7SL57P,RNA5SP295,RP11-165N19.4,RP11-432F4.2	S1(5.2)	0
chr11	63748500	63954500	206	11q13.1	0.041	AP000721.4,FLRT1,MACROD1,OTUB1,RP11-21A7A.2,RP11-21A7A.3,RP11-21A7A.4,STIP1	G1(5.6)	0
chr2	174907500	175113500	206	2q31.1	1.088	AC016737.1,OLA1,RN7SL65P,RP11-451F14.1	S1(4.8)	0
chr8	133128500	133334500	206	8q24.22	0.191	KCNQ3	S4(2.1)	0
chr2	179059500	179265560	206	2q31.2	0.346	OSBPL6	S2(3.8)	0
chr3	150058500	150264464	206	3q25.1	4.063	SERP1,TSC22D2	G1(5.5)	0
chr1	201592012	201798268	206	1q32.1	5.681	AC096677.1,IPO9-AS1,MIR1231,MIR5191,NAV1,RNU6-501P,RP11-25B7.1,RP11-90L20.2	G1(5.7)	0
chr3	15695500	15901500	206	3p25.1	2.732	ANKRD28,MIR3134,RN7SL4P,RP11-44D5.1	S1(5.4)	0
chr8	25697651	25903500	206	8p21.2	1.077	AC090103.1,EBF2	S3(3.3)	0
chr5	36876500	37082500	206	5p13.2	1.801	KRT18P31,NIPBL	S2(3.6)	0
chr8	2583500	2789500	206	8p23.2	0.108	GS1-57L11.1,RP11-134O21.1	G2(1.3)	0
chr3	185337500	185542500	205	3q27.2	1.389	C3orf65,IGF2BP2,MIR548AQ,SENP2	S1(4.9)	0
chr20	50179370	50384500	205	20q13.2	0.665	ATP9A,RP5-827A12.2	S1(4.8)	0
chrX	122662500	122867500	205	Xq25	1.035	FERP1,RN7SL29P,RP5-1189B24.1,THOC2,TUBB4AP1	S2(4.1)	0
chr10	28083500	28288500	205	10p12.1	0.075	ARMC4,RPL36AP55	S2(4)	0
chr9	21408500	21613500	205	9p21.3	6.67	IFNA1,IFNA8,IFNE,IFNWP19,IFNWP2,MIR31,MIR31HG,SNORD39:3	S1(5.3)	0.535	1	1			2
chr17	80709939	80914500	205	17q25.3	0.316	AC068014.1,AC068014.2,B3GNTL1,RP11-497H17.1,RP11-567O16.1,TBCD,ZNF750	S1(4.9)	0
chr7	95746500	95951500	205	7q21.3	0.474	AC084368.1,AC096775.2,MIR591,SLC25A13	S4(2.2)	0
chr11	48002500	48207500	205	11p11.2	1.847	AC103828.1,MIR3161,PTPRJ	S1(5.4)	0
chr7	76168500	76373500	205	7q11.23	0.09	AC004980.1,AC004980.10,AC004980.11,AC004980.7,POMZP3,UPK3B	S1(5.2)	0
chr7	135428500	135632500	204	7q33	0.036	AC015987.1,AC015987.2,AC091736.1,FAM180A,LUZP6,MTPN	S1(4.5)	0
chr7	11012500	11216500	204	7p21.3	0.546	AC005007.3,PHF14	S4(1.8)	0
chr3	164168500	164372500	204	3q26.1	0.071		G2(1.2)	0
chr1	161736083	161940500	204	1q23.3	0.897	ATF6,RP11-456P18.2	S1(4.7)	0
chr18	9101500	9305500	204	18p11.22	2.582	ANKRD12,NDUFV2,RP11-143J12.2,RP11-143J12.3,RP11-21J18.1,RP11-888D10.4,Y_RNA:265,Y_RNA:275,snoU13:151	S1(5.3)	0
chr12	66215500	66419500	204	12q14.3	6.321	AC090673.1,AC090673.2,HMGA2,RP11-366L20.2,RP11-366L20.3,RPSAP52	G1(5.7)	0
chr12	104645500	104849072	204	12q23.3	6.081	EID3,RP11-818F20.5,RPL18AP3,TXNRD1	S1(5.4)	0
chr10	31117500	31321500	204	10p11.22-23	0.343	DDX10P1,RP11-330O11.3,ZNF438	S1(5.3)	0
chr3	57741500	57945500	204	3p14.3	1.158	PPIAP16,RP11-332H21.2,SLMAP	G1(5.6)	0
chr9	108006500	108210076	204	9q31.1-2	1.146	SLC44A1	S1(4.9)	0
chr20	2820500	3024267	204	20p13	0.797	PCED1A,PTPRA,VPS16	S1(4.9)	0
chr2	208687493	208891500	204	2q33.3	0.441	AC083900.1,PLEKHM3,RNU6-360P	S2(3.7)	0
chr12	15738500	15942500	204	12p12.3	3.348	EPS8,PTPRO,RNU6-251P,RP11-6B19.1	S1(5.3)	0
chr1	23039500	23243174	204	1p36.12	0.025	AL611946.1,EPHB2,MIR4253,MIR4684,RP11-69E9.1	S1(5.2)	0
chr9	4984500	5187500	203	9p24.1	0.899	AL161450.1,IGHEP2,INSL6,JAK2,MTND1P11,MTND4P14,MTND5P14,MTND6P5,RP11-39K24.12,RP11-39K24.13,RP11-39K24.14,RP11-39K24.2,RP11-39K24.4,RP11-39K24.7,RP11-39K24.9	S2(4.1)	0
chr13	60970500	61173500	203	13q21.2	0.481	AL354764.1,TDRD3	S3(2.6)	0
chr2	113969098	114172500	203	2q13	0.225	AC016683.6,IGKV1OR2-108,PAX8,RP11-65I12.1	S1(4.8)	0
chr8	67579500	67782983	203	8q13.1	0.475	C8orf44,C8orf44-SGK3,PTTG3P,SGK3	S1(5.2)	0
chr9	2641395	2844500	203	9p24.2	0.827	KCNV2,KIAA0020,VLDLR	S3(3)	0
chr14	35591051	35794500	203	14q13.2	0.761	AL121594.1,KIAA0391,PPP2R3C,PSMA6,RP11-173D9.1,RP11-173D9.5,RPL7AP3,RPL9P3	S1(5.4)	0
chr10	15210692	15413500	203	10p13	0.832	FAM171A1,RP11-25G10.2,RP11-455B2.9	S1(4.7)	0
chr10	95044500	95247500	203	10q23.33	4.797	MYOF	S1(5.3)	0
chr8	23112500	23315500	203	8p21.2-3	2.752	CHMP7,ENTPD4,LOXL2,R3HCC1,RP11-177H13.2	G1(5.6)	0
chr4	159689500	159892500	203	4q32.1	2.108	C4orf45,FNIP2,RNU6-128P	S1(4.6)	0
chr13	47127500	47330500	203	13q14.13-2	0.93	LRCH1	S2(3.7)	0
chr12	81128500	81331500	203	12q21.31	0.491	LIN7A,MIR617,MIR618,RP11-299A16.1,RP11-540D4.3	S2(4.1)	0
chr8	12931500	13134500	203	8p22	7.475	DLC1,Y_RNA:709	S1(5.2)	0.456		1			1
chr5	118122500	118324500	202	5q23.1	0.097	DTWD2,PTMAP2	S3(3.2)	0
chr4	9854500	10056560	202	4p16.1	0.034	RP11-448G15.1,RP13-560N11.1,SLC2A9	S3(2.9)	0
chr10	74451500	74653338	202	10q22.1	1.876	MCU,MIR4676,RP11-354E23.5	S1(5.2)	0
chr10	88516500	88718374	202	10q23.2	1.419	BMPR1A,MMRN2,RNU1-19P,RP11-420K10.1	G1(5.5)	0
chr1	244614500	244816236	202	1q44	0.14	AC099757.1,ADSS,C1orf101,RP11-523K4.2	S2(4.1)	0
chr11	46413500	46615675	202	11p11.2	1.145	AMBRA1,MIR3160-2,RP11-425L10.1	G1(5.6)	0
chr15	38544500	38746327	202	15q14	1.31	SPRED1	S1(4.6)	0
chr5	52083500	52285155	202	5q11.2	0.544	CTD-2175A23.1,CTD-2207L17.1,CTD-2207L17.2,CTD-2288O8.1,ITGA1,PELO	S1(5.4)	0
chr2	65663500	65865500	202	2p14	0.059	AC007389.1,AC007389.2,AC007389.3,AC012370.3,AC074391.1,RN7SL635P,Vault:4	S1(4.6)	0
chr17	53044500	53246183	202	17q22	0.212	COX11,STXBP4	S3(2.6)	0
chr2	203499900	203701500	202	2q33.2	0.083	AC098831.4:1,AC098831.4:2,FAM117B,ICA1L	S2(4.4)	0
chr11	45940363	46142500	202	11p11.2	0.979	AC024475.1,GYLTL1B,PHF21A,RP11-702F3.1	S1(5)	0
chr1	222987500	223189500	202	1q41	0.251	DISP1,NDUFB1P2,RP11-452F19.3,snoU13:201	S2(3.6)	0
chr3	149537500	149739500	202	3q25.1	0.437	AC117395.1,ANKUB1,HNRNPA1P24,NPM1P29,PFN2,RNF13,RNU6-720P,RP11-651P23.2,RP11-651P23.4,RP11-651P23.5	S1(5.2)	0
chr22	27052500	27254596	202	22q12.1	0.396	CTA-211A9.5,CTA-373H7.7,MIAT	S2(4.4)	0
chrX	49686500	49887500	201	Xp11.22-23	0.194	AF222686.1,CLCN5,MIR188,MIR362,MIR500A,MIR500B,MIR501,MIR502,MIR532,MIR660,RNU6-421P	S4(2)	0
chr5	37049500	37250500	201	5p13.2	1.026	C5orf42,CTD-2284O10.3,NIPBL,OFD1P17,RN7SL37P,RPS4XP6	S2(4.4)	0
chr6	3255500	3456500	201	6p25.2	0.505	PSMG4,RP11-506K6.4,SLC22A23	S1(4.8)	1			1		1
chr11	73107481	73308500	201	11q13.4	1.099	FAM168A,HMGN2P38,RELT,RP11-809N8.4,RP11-809N8.5,RP11-809N8.6	G1(5.5)	0
chr4	174090500	174291119	201	4q34.1	0.188	GALNT7,HMGB2,MIR548T,RP11-10K16.1,RP11-798M19.3,RP11-798M19.6	S2(4.2)	0
chr1	204796500	204997500	201	1q32.1	1.633	NFASC,RP11-494K3.2,SNORD112:30	S1(4.5)	0
chr16	87224500	87425748	201	16q24.2	0.174	C16orf95,FBXO31,MAP1LC3B,RP11-178L8.1,RP11-178L8.4,RP11-178L8.5,RP11-178L8.7,RP11-178L8.8,RP11-178L8.9,RP11-899L11.1,RP11-899L11.3,snoU13:109	S1(4.8)	0
chr1	71312500	71513491	201	1p31.1	0.103	PTGER3,RP3-333A15.1,RP3-333A15.2	S4(2.3)	0
chr12	861500	1062500	201	12p13.33	2.209	RAD52,RNU4ATAC16P,WNK1	S1(4.8)	0
chr3	135684500	135885500	201	3q22.2-3	1.075	MSL2,PPP2R3A,RP11-305O4.2,RP11-305O4.3,TDGF1P6	S1(4.7)	0
chr1	77332500	77533604	201	1p31.1	0.227	AC096951.1,ST6GALNAC5	S2(3.7)	0
chr9	5628500	5829500	201	9p24.1	2.41	ERMP1,KIAA1432,RP11-207C16.4	S1(5)	0
chr15	93152500	93352500	200	15q26.1	0.091	ASB9P1,CTD-2313J17.1,CTD-2313J17.3,CTD-2313J17.5,FAM174B,HMGN1P38,RP11-386M24.1,RP11-386M24.4,RP11-386M24.5,RP11-386M24.8,RP11-386M24.9	S1(4.7)	0
chr6	90348472	90548500	200	6q15	0.526	CASP8AP2,DNAJC19P6,MDN1,RP1-122O8.7,RP11-63K6.1,snoU13:373	S3(3.1)	0
chr2	173940500	174140500	200	2q31.1	1.883	MLK7-AS1,MLTK	S1(5.2)	0
chr3	49976500	50176500	200	3p21.31	1.285	RBM5,RBM6,RP11-493K19.3	G1(5.6)	0
chr19	43657430	43857824	200	19q13.31	0.065	AC005392.13,CD177,CEACAMP10,CEACAMP11,CEACAMP4,CTC-490G23.2,PSG4,PSG5,PSG9	G1(5.7)	0
chr12	131437500	131637500	200	12q24.33	0.031	AC078925.1,GPR133,RP11-243M5.1,RP11-76C10.2,RP11-76C10.5	S3(2.5)	0
chr13	48877500	49077500	200	13q14.2	1.16	LINC00441,LPAR6,PCNPP5,PPP1R26P1,RB1,RCBTB2	S2(4)	0
chr15	51715500	51915500	200	15q21.2	0.334	AC020892.1,DMXL2,RP11-707P17.1,RP11-707P17.2	S2(4.1)	0
chr15	80697500	80897500	200	15q25.1	0.106	ARNT2,RP11-210M15.1,RP11-379K22.2,RP11-379K22.3,hsa-mir-5572	S1(5.2)	0
chr8	38964508	39164500	200	8p11.22	0.136	ADAM32,RPL3P10	S1(4.6)	0
chr4	126235500	126435500	200	4q28.1	1.171	FAT4,Y_RNA:529	S3(3.1)	0
chr9	125391852	125591500	200	9q33.2	0.091	OR1K1,OR1L1,OR1L3,OR1L4,OR1L6,OR5C1,PDCL,RP11-64P14.7,SKA2P1,TLK1P1	S2(4.2)	0
chr21	38739500	38938500	199	21q22.13	2.529	AP001421.1,DYRK1A	S2(4.1)	0
chr15	81071683	81270500	199	15q25.1	2.956	KIAA1199,MESDC2,MIR549,RP11-351M8.1,RP11-351M8.2	S1(5.1)	0
chr15	25909500	26108500	199	15q12	1.608	ATP10A,MIR4715,RNA5SP390,Y_RNA:162	S2(3.8)	0
chr1	235292251	235491500	199	1q42.3	1.472	AL391994.1,ARID4B,ARID4B-IT1,GGPS1,MIR4753,RBM34,RPL23AP23	S1(5.3)	0
chr13	26828500	27027500	199	13q12.13	0.786	CDK8	S3(3.3)	0
chrX	21459500	21658500	199	Xp22.12	0.025	AL928874.1,CNKSR2	S3(3)	0
chr7	55087500	55286500	199	7p11.2	2.13	EGFR,EGFR-AS1	S1(5)	0
chr6	71377500	71576500	199	6q13	0.808	B3GAT2,RP11-160A9.2,RP11-160A9.3,SMAP1	S3(2.7)	0
chr13	113344500	113543500	199	13q34	0.191	AL162711.1,AL356740.1,ATP11A,ATP11A-AS1	S2(3.9)	0
chr5	138088500	138287500	199	5q31.2	3.101	AC034243.1,CTNNA1,LRRTM2,RN7SL867P,SIL1	S1(4.7)	0
chr1	115703500	115902500	199	1p13.2	0.781	NGF,RP4-663N10.1	S1(5.1)	0
chr18	60788500	60987361	199	18q21.33	0.023	BCL2,RP11-28F1.2,RP11-299P2.1,snoU13:157	S2(3.5)	0
chr12	96623500	96821500	198	12q23.1	3.723	CDK17,ELK3,RN7SKP11,RNU4-24P,RP11-117N2.2,RP11-510I5.4	S1(5.4)	0
chr12	29301500	29499500	198	12p11.22	0.042	ERGIC2,FAR2,RP11-946L16.1,RP11-996F15.2	S3(3.3)	0
chrX	85105144	85303500	198	Xq21.2	1.139	CHM,MIR361,Y_RNA:780	S4(1.7)	0
chr5	118406500	118604386	198	5q23.1	0.899	AC027320.1,CTB-161M19.4,DMXL1,LAMTOR3P2,MIR5706,RNU6-701P,RP11-950K24.2	S2(3.8)	0
chr2	167034500	167232500	198	2q24.3	0.154	AC010127.3,RN7SKP152,SCN9A,snoU13:239	S2(4.2)	0
chr15	25201500	25399500	198	15q11.2	0.598	PWAR6,RP11-145P16.3,RP11-701H24.10,RP11-701H24.3,RP11-701H24.7,SNHG14:1,SNHG14:2,SNORD108,SNORD109A,SNORD116-1,SNORD116-10,SNORD116-11,SNORD116-12,SNORD116-13,SNORD116-14,SNORD116-15,SNORD116-16,SNORD116-17,SNORD116-18,SNORD116-19,SNORD116-2,SNORD116-20,SNORD116-23,SNORD116-24,SNORD116-25,SNORD116-26,SNORD116-27,SNORD116-29,SNORD116-3,SNORD116-30,SNORD116-5,SNORD116-6,SNORD116-7,SNORD116-8,SNORD1…	S4(1.9)	0
chr13	52158500	52356500	198	13q14.3	3.13	ATP5F1P1,DHRS12,RN7SL413P,RNY1P6,WDFY2	S1(5.1)	0
chr8	28923500	29121500	198	8p12	0.031	CTD-2647L4.1,CTD-2647L4.5,HMGB1P23,KIF13B,RN7SL781P	S1(4.7)	0
chr9	13081500	13279500	198	9p23	0.74	MPDZ,RP11-272P10.2	S3(2.9)	0
chr8	123793500	123990500	197	8q24.13	0.221	AC016405.2,RP11-44N11.1,RP11-557C18.4,ZHX2	S2(4.4)	0
chr7	91569500	91766500	197	7q21.2	0.993	AKAP9,CTB-161K23.1,CYP51A1,LRRD1	S2(4.3)	0
chr9	123145500	123342500	197	9q33.2	0.738	CDK5RAP2	S1(4.7)	0
chr20	34359500	34556532	197	20q11.22-23	1.243	CNBD2,COX7BP2,HIGD1AP16,PHF20,RNU4-40P,RNU6-937P,SCAND1,Y_RNA:385	G1(5.5)	0
chr4	188230836	188427500	197	4q35.2	1.08	RP11-91J3.1,RP11-91J3.2,RP11-91J3.3	S3(2.9)	0
chr11	27527500	27724500	197	11p14.1	0.098	BDNF,BDNF-AS,LIN7C,LINC00678,RNA5SP339,RP11-587D21.1,RP11-587D21.4	S1(4.8)	0
chrX	66763500	66960500	197	Xq12	0.224	AR	S4(2.4)	0
chr1	54682500	54879500	197	1p32.3	0.55	MRPL37,RP5-997D24.3,SSBP3,SSBP3-AS1	S1(4.9)	0
chr4	15470500	15667500	197	4p15.32	0.152	AC007016.3,CC2D2A,FBXL5,RP11-799M12.2	S2(4.3)	0
chr8	120867500	121064418	197	8q24.12	0.269	DEPTOR,DSCC1,KB-1471A8.1,RN7SL396P,RNA5SP277	S3(3.4)	0
chr2	112446500	112642500	196	2q13	0.055	AC093166.2,AC093166.3,AC093166.4,ANAPC1,MIR4771-1	S1(5)	0
chr11	121791500	121987031	196	11q24.1	7.913	BLID,MIR125B1,RNU6-256P,RP11-166D19.1	S1(5.3)	0
chr1	163096500	163292500	196	1q23.3	0.093	NUF2,RGS5,RP11-267N12.1,RP11-267N12.2,RP11-267N12.3,RP11-77M5.1	S1(4.8)	0
chr2	75185500	75381491	196	2p12	0.108	MIR5000,POLE4,TACR1	S1(4.9)	0
chr8	42752500	42948657	196	8p11.21	1.772	FNTA,HOOK3,RNU1-124P,RP11-598P20.5,Y_RNA:722	S1(4.5)	0
chr12	114209500	114405500	196	12q24.13-21	0.277	RBM19,RP11-438N16.1,RP11-438N16.2,RP11-780K2.1	S3(3.1)	0
chr2	106361500	106557500	196	2q12.2	0.476	AC009505.2,NCK2	S3(3)	0
chr1	15250500	15445500	195	1p36.21	0.537	KAZN,TMEM51-AS1	S2(3.5)	0
chr2	233561500	233756500	195	2q37.1	1.508	AC064852.4,AC064852.5,C2orf82,GIGYF2,KCNJ13,NGEF,RNU6-107P,Y_RNA:432	S2(3.9)	0
chr13	50510626	50705500	195	13q14.2	1.567	AL136123.1,DLEU1,DLEU2,KCNRG,MIR16-1,MIR3613,RPL18P10,TRIM13	S2(4.4)	0
chr3	136581049	136776500	195	3q22.3	0.671	IL20RB,IL20RB-AS1,NCK1,RP11-85F14.1	S1(4.7)	0
chr12	46123500	46318500	195	12q12	1.015	ARID2,KNOP1P2,RN7SL246P,SCAF11	S2(3.9)	0
chr5	24450500	24645500	195	5p14.1-2	0.679	CDH10,RP11-116O11.1,RP11-116O11.2	G2(1.3)	0
chr2	172096500	172291500	195	2q31.1	0.338	AC008065.1,DCAF17,METTL8	S1(5)	0
chr6	7727500	7922500	195	6p24.3	0.602	BLOC1S5-TXNDC5,BMP6,TXNDC5	S3(3.3)	0
chr10	123492500	123687500	195	10q26.13	0.577	ATE1,RP11-78A18.2,Y_RNA:3	S2(3.6)	0
chr5	109878500	110073500	195	5q22.1	0.02	SNORA51:10,TMEM232	S4(2.2)	0
chr6	5067216	5261500	194	6p25.1	0.323	AL162381.1,FARS2,LYRM4,MIR3691,PPP1R3G	S2(4.3)	0
chr9	116638500	116832500	194	9q32	0.592	AMBP,ZNF618	S1(4.8)	0
chr16	77822500	78016500	194	16q23.1	0.027	RP11-281J9.1,VAT1L	S3(2.9)	0
chr20	18568536	18762500	194	20p11.23	0.635	DTD1,DUXAP7,RN7SL638P,RNU6ATAC34P,RP11-379J5.5	S3(3.2)	0
chr4	99386500	99580500	194	4q23	1.58	RP11-1299A16.3,RP11-724M22.1,TSPAN5	S1(4.8)	0
chr1	35734500	35928500	194	1p34.3	1.449	KIAA0319L,RN7SL503P,RNY5P1,RPL5P4,SNORA62:3,ZMYM4,ZMYM4-AS1	S1(4.5)	0
chr3	8811314	9005457	194	3p25.3	0.549	CAV3,RAD18,SNORA43:5,hsa-mir-548ba	S1(5)	0
chr13	99853500	100047500	194	13q32.3	0.849	GPR18,GPR183,H2AFZP3,HMGB3P4,MIR623,RN7SKP9,UBAC2	S2(4.1)	0
chr3	66270500	66464500	194	3p14.1	0.469	LRIG1,RN7SL482P,RNU6-787P,SLC25A26	S1(4.7)	0
chr3	57992500	58186500	194	3p14.3	2.893	DNASE1L3,FLNB,FLNB-AS1	G1(5.6)	0
chr8	61592500	61786500	194	8q12.1-2	0.086	CHD7,RP11-33I11.2	S4(2.4)	0
chr5	167719500	167913449	194	5q34	0.038	WWC1	S2(3.9)	0
chr20	39752500	39946500	194	20q12	1.611	PLCG1,RN7SL615P,RP1-1J6.2,RP3-511B24.5,RP3-511B24.6,RPL23AP81,TOP1,ZHX3	G1(5.6)	0
chr2	145090135	145283500	193	2q22.3	1.834	AC009951.1,AC009951.2,ZEB2,ZEB2-AS1	S2(3.9)	0
chr5	122179133	122371965	193	5q23.2	1.036	PPIC,RN7SL689P,SNX24,snoU13:345	S3(3.1)	0
chr5	109025500	109218882	193	5q21.3	3.024	CTC-287O8.1,MAN2A1,RN7SKP230	S3(2.6)	0
chr17	45330500	45523500	193	17q21.32	0.038	CTD-2026D20.2,EFCAB13,ITGB3,RNU7-186P,RP11-290H9.4	G1(5.6)	0
chr17	75083500	75276650	193	17q25.2	0.896	AC015815.1,AC015815.2,AC015815.6,AC015815.7,AC015815.8,CYCSP40,LINC00338,RNU4-47P,RP11-285E9.5,RP11-285E9.6,SEC14L1	G1(5.6)	0
chr3	101039404	101232500	193	3q12.3	0.581	RP11-144C15.1,SENP7,Y_RNA:472,ZNF90P1,snoU13:278	S2(4.3)	0
chr12	81471500	81664462	193	12q21.31	0.202	ACSS3,MIR4699,PPFIA2,RP11-121G22.3,RP11-543H12.1	S3(2.6)	0
chr2	67911209	68104500	193	2p14	0.029	AC010987.6	S1(4.5)	0
chr2	11292500	11485500	193	2p25.1	2.329	AC018463.4,PQLC3,RNU6-1081P,ROCK2	S1(4.9)	0
chr15	57668500	57861500	193	15q21.3	0.019	CGNL1,CTD-2515H24.1,CTD-2515H24.3,CTD-2515H24.4,RNU6-844P	S1(4.6)	0
chr6	111611500	111804500	193	6q21	2.616	BRD7P4,FCF1P5,REV3L,REV3L-IT1,RP5-1112D6.7,RP5-1112D6.8	S1(4.8)	0
chr10	119301500	119494823	193	10q26.11	0.358	CTA-109P11.1,EMX2,EMX2OS	S4(2.4)	0
chr5	171241500	171433877	192	5q35.1	1.702	FBXW11	S1(4.8)	0
chr2	201171500	201363500	192	2q33.1	2.116	AC105381.1,KCTD18,SPATS2L,Y_RNA:423	S1(4.8)	0
chr3	188694542	188886500	192	3q28	0.033	RP11-297K7.1,TPRG1	S1(4.9)	0
chr17	66255322	66447500	192	17q24.2	0.026	ARSG,MIR635,RP11-120M18.2,SLC16A6,WIPI1	S2(4.2)	0
chr11	30417500	30609500	192	11p14.1	0.039	MPPED2,RP4-710M3.2,RP5-1024C24.1	S4(1.5)	0
chr4	154387500	154579723	192	4q31.3	0.847	KIAA0922,RP11-153M7.3	S1(4.5)	0
chr2	66661500	66853500	192	2p14	2.021	AC007392.3,MEIS1,MEIS1-AS1,MEIS1-AS2	S2(3.6)	0
chr7	77428121	77619700	192	7q11-21	0.946	PHTF2,Y_RNA:672	S1(4.7)	0
chr12	12227500	12419500	192	12p13.2	0.991	BCL2L14,LRP6,RNU6-545P,RP11-267J23.1,RP11-267J23.4,RP11-757G14.3	S2(4.4)	0
chr6	126307575	126498338	191	6q22.32	0.311	TRMT11	S2(4.3)	0
chr14	59655500	59846500	191	14q23.1	0.654	DAAM1	S1(4.6)	0
chr14	56586500	56777597	191	14q22.3	0.06	PELI2,RP11-930O11.2	S3(3.2)	0
chr2	232062500	232253686	191	2q37.1	0.55	AC018738.2,ARMC9,MIR4777	G1(5.5)	0
chr3	142417500	142608500	191	3q23	0.313	PCOLCE2,PLS1,RNU7-47P,RP11-372E1.1,TRPC1	S3(3.3)	0
chr12	57634498	57825500	191	12q13.3	0.916	AC126614.1,R3HDM2,RNU6-879P,RP11-123K3.4,RP11-756H6.1,STAC3	G1(5.7)	0
chr4	144621409	144812500	191	4q31.21	0.044	FREM3,GYPE,RP11-780M14.1,RP13-578N3.3	S4(2.2)	0
chr10	93202500	93393500	191	10q23.32	0.725	HECTD2,PPP1R3C,RP11-108M11.3,RPS27P1	S1(5.2)	0
chr4	21695500	21886500	191	4p15.2	0.023	KCNIP4,RP11-556G22.2	S3(2.6)	0
chr3	97482500	97673500	191	3q11.2	0.426	ARL6,CRYBG3:1,CRYBG3:2,MINA	S4(2)	0
chr3	112357500	112548500	191	3q13.2	0.082	CCDC80,CD200R1L,RP11-180K7.1,RP11-572C15.3,RP11-572C15.5	G1(5.5)	0
chr2	222249500	222440500	191	2q36.1	0.605	AC079834.2,CTD-2308L22.1,EPHA4,TMEM256P2	S4(2.2)	0
chr2	171826500	172017500	191	2q31.1	2.551	TLK1,snoU13:240	S1(4.9)	0
chr3	138363536	138553500	190	3q22.3	0.559	EEF1A1P25,GAPDHP39,PIK3CB,RPL23AP40	S2(4.3)	0
chr7	24612500	24802500	190	7p15.3	0.366	CTA-298G8.1,CTA-298G8.2,DFNA5,MPP6	S2(4.3)	0
chr6	108882500	109072856	190	6q21	3.508	FOXO3,SUMO2P8	S1(5)	0
chr14	73740789	73930500	190	14q24.2-3	2.202	NUMB,PAPLN,RP1-240K6.3	G1(5.6)	0
chr4	154075500	154265800	190	4q31.3	0.574	ANXA2P1,RNU6-1196P,TRIM2,Y_RNA:549	S1(4.9)	0
chr6	116575335	116765322	190	6q22.1	0.784	DSE,RP1-93H18.1,RP3-486I3.4,RP3-486I3.7,TSPYL1	S1(5)	0
chr2	149895500	150085500	190	2q23.1-2	0.341	AC073271.1,LYPD6B	S3(2.6)	0
chr3	192446500	192636500	190	3q29	1.184	FGF12,MB21D2,RNU1-20P	S3(3.3)	0
chr7	84624500	84814500	190	7q21.11	0.18	HSPA8P16,SEMA3D	S3(3.3)	0
chr16	9181500	9371500	190	16p13.2	1.352	C16orf72,RP11-473I1.10,RP11-473I1.5,RP11-473I1.9,RPL21P119	S1(5.1)	0
chr15	43663223	43852500	189	15q15.3	0.492	MAP1A,PPIP5K1,RN7SL487P,TP53BP1,TUBGCP4	S1(5.1)	0
chrX	71175500	71364033	189	Xq13.1	0.06	NHSL2,RGAG4,RNU6-1078P,RP11-262D11.1,RPS26P11	S2(4.3)	0
chr12	105500500	105689500	189	12q23.3	1.068	APPL2,C12orf75,KIAA1033,RP11-61E11.2	G1(5.7)	0
chr10	126659500	126848500	189	10q26.13	1.272	CTBP2,MIR4296,ZRANB1	S2(4.4)	0
chr17	693765	882500	189	17p13.3	0.66	NXN,RNMTL1,RP11-356I18.1,RP11-676J12.6,RP11-676J12.7	S1(5.3)	0
chr17	65052500	65241500	189	17q24.2	1.453	CACNG1,HELZ,RP11-401F2.3,RP11-401F2.4,RPL36AP48	S1(4.5)	0
chr4	73935472	74124500	189	4q13.3	3.155	ANKRD17,HMGA1P2	S3(3.1)	0
chr19	42901500	43090500	189	19q13.2	0.064	CEACAM1,CEACAM8,CEACAMP2,CTB-50E14.4,CTB-50E14.5,CXCL17,LIPE,LIPE-AS1,RNU4-60P	S1(5)	0
chr15	55611359	55800432	189	15q21.3	0.302	C15orf65,CCPG1,DYX1C1,DYX1C1-CCPG1,MIR628,PIGB,RP11-178D12.2	S2(3.8)	0
chr22	42551007	42740500	189	22q13.2	0.438	CTA-989H11.1,TCF20,Z83851.3,Z83851.4	S1(4.5)	0
chr9	134426500	134615500	189	9q34.13	0.72	RAPGEF1,RN7SL328P	S1(5)	0
chr4	26859299	27048500	189	4p15.2	0.443	RP11-293A21.1,RP11-293A21.2,STIM2	S2(4)	0
chr1	152161500	152350500	189	1q21.3	0.185	FLG,FLG-AS1,FLG2,HRNR,RP1-91G5.3,RP11-107M16.2	S3(3.1)	0
chr1	10270862	10458648	188	1p36.22	1.757	KIF1B,MIR1273D,RN7SL721P,RN7SL731P,RNU6-37P	S1(5.4)	0
chr2	150186500	150374500	188	2q23.2	0.282	AC007394.3,LYPD6	S3(3.2)	0
chr2	173420500	173608865	188	2q31.1	0.275	AC018712.2,AC093818.1,PDK1,RAPGEF4,RAPGEF4-AS1,Y_RNA:450,snoU13:241	G1(5.5)	0
chr16	69796208	69984500	188	16q22.1	0.58	MIR140,SNORA62:2,WWP2,Y_RNA:204	G1(5.6)	0
chr12	79897142	80084877	188	12q21.2	1.582	PAWR,RN7SL696P,RP1-78O14.1,RP11-359M6.1,RP11-359M6.3,RP11-530C5.1	S1(4.8)	0
chr14	93393500	93581500	188	14q32.12	0.225	CHGA,ITPK1,ITPK1-AS1	S2(3.8)	0
chr9	133589332	133777500	188	9q34.12	1.69	ABL1,QRFP,RP11-57C19.6	S1(5.2)	0
chr20	3451500	3639500	188	20p13	0.639	AL109805.1,ATRN,SF3A3P1	S1(5.1)	0
chr7	39986500	40174574	188	7p14.1	1.462	CDK13,MPLKIP,RP11-467D6.1,RP5-1147A1.1,RP5-1147A1.2,Y_RNA:687	S2(4.1)	0
chr4	128983500	129171500	188	4q28.2	0.638	FOSL1P1,LARP1B,RP11-214O14.1	S1(4.7)	0
chr6	12008500	12196500	188	6p24.1	0.999	HIVEP1,RP11-456H18.2	S2(4.3)	1			1		1
chr3	159449500	159637500	188	3q25.33	2.526	AC021654.1,IL12A-AS1,IQCJ-SCHIP1,IQCJ-SCHIP1-AS1,RNU2-31P,SCHIP1	S1(5.4)	0
chr18	22346500	22534500	188	18q11.2	0.078	RP11-449D8.5,RP11-958F21.1	S2(3.9)	0
chr3	135727500	135915500	188	3q22.3	0.848	MSL2,PPP2R3A,RP11-305O4.2,RP11-305O4.3,TDGF1P6	S1(4.8)	0
chr6	163835500	164023500	188	6q26	3.233	QKI,RP5-826L7.1	S4(2.4)	0
chr8	125551699	125738500	187	8q24.13	0.021	MTSS1,NDUFB9,RP11-532M24.1	S2(4.1)	0
chr8	79749763	79936500	187	8q21.12	0.041	RP11-79H23.3	S3(2.8)	0
chr7	151251500	151438500	187	7q36.1	0.292	PRKAG2	G1(5.5)	0
chr5	112042500	112229029	187	5q22.2	2.793	APC,CBX3P3,CTC-487M23.8,CTC-554D6.1,REEP5,RNU6-482P,SRP19,XBP1P1,ZRSR1	S1(4.6)	0
chr2	39663500	39850500	187	2p22.1	0.117	AC007246.3,MAP4K3	S1(5.4)	0.063		1			1
chr4	42472500	42659500	187	4p13	0.021	ATP8A1,RP11-473D24.1,RPS7P7	S4(1.5)	0
chr9	82186500	82373500	187	9q21.31	1.845	RP11-79D8.2,TLE4	S3(3.1)	0
chr11	65837833	66024764	187	11q13.1-2	1.537	PACS1,RP11-755F10.1,snoU13:28	G1(5.6)	0
chr21	16254296	16441500	187	21q11-21	2.375	AF127577.10,AF127577.11,AF127577.12,AF127577.8,NRIP1	S3(3.2)	0
chr14	63823500	64010500	187	14q23.2	1.449	CTD-2302E22.4,PPP2R5E,RN7SL540P,RNU6-852P,SCARNA20:2	S2(4.2)	0
chr18	12991360	13178500	187	18p11.21	0.797	CEP192,RP11-807E13.2,RP11-807E13.3	S2(4.1)	0
chr4	146674500	146861500	187	4q31.21-22	0.809	C4orf51,RP11-181K12.2,ZNF827	S2(4.2)	0
chr3	45428500	45614500	186	3p21.31	0.47	LARS2,LARS2-AS1,LIMD1	S1(5.3)	0
chr11	12398731	12584500	186	11p15.3	2.661	PARVA,RP11-51B23.3	G1(5.7)	0
chr2	69870500	70056773	186	2p13.3	0.392	AAK1,AC092431.3,ANXA4,snoU13:247	G1(5.6)	0
chr5	98104500	98290097	186	5q15-21	3.831	CHD1,CSNK1A1P3,CTD-2007H13.3,RGMB,RGMB-AS1,RNU6-402P,Y_RNA:610	S2(4.2)	0
chr2	181845500	182031500	186	2q31.3	1.936	AC068196.1,AC104820.2,UBE2E3	S3(3.3)	0
chr5	97544500	97729234	185	5q15	0.025	CH17-12M21.1,KRT8P32,RP11-274E7.2	S1(4.8)	0
chr14	103058500	103243812	185	14q32.31-32	0.984	RCOR1,RP11-661D19.1,RP11-661D19.3,Y_RNA:128	G1(5.5)	0
chr14	102229500	102414683	185	14q32.31	0.853	CTD-2017C7.1,CTD-2017C7.2,CTD-2017C7.3,PPP2R5C,RNU6-790P	S1(5.1)	0
chr9	129088500	129273500	185	9q33.3	0.455	MVB12B,NRON,SNORD116:3	S2(3.6)	0
chr20	33688500	33873500	185	20q11.22	0.227	AL121753.1,EDEM2,EIF6,FAM83C-AS1,MMP24,MMP24-AS1,MT1P3,PROCR,RNA5SP483,RP4-614O4.11,RP4-614O4.12,SNORD56:4	G1(5.6)	0
chr1	95096500	95281500	185	1p21.3	0.036	KATNBL1P2,LINC01057,MIR378G,PGBD4P7	G1(5.7)	0
chr11	101981191	102165790	185	11q22.1-2	2.257	RP11-864G5.3,YAP1	S1(5.4)	0
chr14	56047500	56232500	185	14q22.3	1.209	KTN1,RP11-813I20.2,Y_RNA:134	S2(4.2)	0
chr13	110774500	110959500	185	13q34	0.779	COL4A1,COL4A2	S1(5)	0
chr2	178256500	178441500	185	2q31.2	1.139	AC074286.1,AGPS,NFE2L2,TTC30B	S2(3.6)	0
chr1	48753500	48938500	185	1p33	0.133	PPP1R8P1,RNU4-61P,RNU6-723P,RP11-329A14.1,SPATA6	S4(1.8)	0
chr17	67138029	67323500	185	17q24.3	0.188	ABCA10,ABCA5,SNRPGP4	S3(2.6)	0
chr5	87995500	88180500	185	5q14.3	0.38	CTC-467M3.1,MEF2C,MEF2C-AS1	S4(2.4)	0
chr3	28616281	28801500	185	3p24.1	0.025	LINC00693	S3(2.7)	0
chr7	583500	767500	184	7p22.3	0.069	AC147651.2,AC147651.4,AC147651.5,HEATR2,PRKAR1B	S1(4.8)	0
chr10	33440500	33624500	184	10p11.22	5.267	NRP1,RN7SL398P,RP11-342D11.2	G1(5.6)	0
chr4	120365500	120549500	184	4q26	0.583	PDE5A,RP11-33B1.1,RP11-33B1.2,RP11-33B1.3,SNORA11:5	S1(4.9)	0
chr6	147524500	147708799	184	6q24.3	2.919	STXBP5,STXBP5-AS1	S2(4.3)	0
chr5	14688500	14872500	184	5p15.2	0.558	ANKH,CTB-40H15.4,FAM105B,MIR4637,RBBP4P1	S1(5)	0
chr14	97263500	97447500	184	14q32.2	0.371	AL133168.3,LINC00618,VRK1	S4(2.2)	0
chr15	29930500	30114500	184	15q13.1	1.833	HMGN2P5,RP11-680F8.1,RP11-680F8.4,TJP1	S1(4.6)	0
chr6	105124500	105308500	184	6q16.3	0.399	HACE1,RNU6-897P,RP11-427E4.1,RP11-809N15.2,RP11-809N15.3	S3(3)	0
chr15	43029324	43213007	184	15q15.2	0.462	CTD-2036P10.3,KRT8P50,TTBK2	S1(5.2)	0
chr1	25943958	26126666	183	1p36.11	0.05	MAN1C1,RP1-187B23.1	S1(5)	0
chr2	239753500	239966500	183	2q37.3	1.387	AC114788.1,AC114788.2,RP11-648F7.1,TWIST2	S1(4.9)	1				1	1
chr1	51801500	51984500	183	1p32.3	1.498	EPS15,RNU6-877P,RP11-191G24.1,RP11-253A20.1,RP11-275F13.3,TTC39A	S1(5.1)	0
chr13	111805500	111988500	183	13q34	1.204	ARHGEF7,TEX29	S3(3.1)	0
chr1	193090500	193273874	183	1q31.2	2.155	B3GALT2,CDC73,MIR1278	S2(4.1)	0
chr1	78469500	78652500	183	1p31.1	1.199	DNAJB4,GIPC2,RNA5SP22,RNFT1P2,RNU6-1102P,RP11-386I14.2,RP11-386I14.3,RP11-386I14.4	S1(5.3)	0
chr2	99770500	99953815	183	2q11.2	0.156	C2orf15,LIPT1,LYG1,LYG2,MITD1,MRPL30,TSGA10,TXNDC9	S2(3.7)	0
chr5	34656500	34839318	183	5p13.2	2.425	CTD-2024P10.1,CTD-2517O10.6,RAI14,TTC23L	S1(5.4)	0
chr18	317366	500500	183	18p11.32	0.137	COLEC12,RP11-720L2.2,RP11-720L2.4	S1(4.7)	0
chr11	84453500	84636500	183	11q14.1	0.018	CTD-2537O9.1,DLG2	S4(2)	0
chr11	77348850	77531500	183	11q14.1	1.324	AP000580.1,FTH1P16,RSF1,RSF1-IT1,RSF1-IT2,Y_RNA:52	S1(5.1)	0
chr2	85359500	85542163	183	2p11.2	0.359	AC093162.1,AC093162.3,RNU6-674P,TCF7L1,TCF7L1-IT1	G1(5.6)	0
chr11	12115542	12297626	182	11p15.3	1.618	MICAL2,RP11-265D17.2	G1(5.7)	0
chr9	36305500	36487500	182	9p13.2	1.277	RNF38	S1(5.1)	0
chr3	118778500	118960500	182	3q13.32	0.376	B4GALT4,B4GALT4-AS1,C3orf30,IGSF11,RP11-484M3.5,UPK1B	S2(4.3)	0
chr5	31351500	31533500	182	5p13.3	0.726	C5orf22,DROSHA,Y_RNA:584	S1(4.8)	0
chr1	143914500	144146807	182	1q21.1	0.212	RP11-289H16.1,RP3-365I19.2,SRGAP2B	S2(4.2)	0
chr2	227700296	227882500	182	2q36.3	0.529	COL4A4,RHBDD1,SNORA48:9	S2(4.2)	0
chr18	15410500	18692500	182	18p-q	0.186	AC036178.1,ROCK1	S2(3.7)	0
chr17	900500	1082500	182	17p13.3	0.251	ABR,MIR3183,TIMM22	S1(5.3)	0
chr5	171433877	171615390	182	5q35.1	0.798	AC113342.1,STK10	S1(5.4)	0
chr2	101436500	101618176	182	2q11.2	0.179	AC016738.3,AC016738.4,AC092168.2,NPAS2	S1(5.1)	0
chr15	65903627	66084500	181	15q22.31	0.586	DENND4A,MIR4511,RAB11A,RP11-16E23.3,RP11-16E23.4,SLC24A1,snoU13:100	S1(5)	0
chr4	83539500	83720010	181	4q21.22	0.275	LINC00575,MIR575,RP11-57B24.1,RP11-57B24.2,SCD5	S1(4.9)	0
chr2	74438500	74619500	181	2p13.1	0.235	DCTN1,DCTN1-AS1,KRT18P26,MTHFD2,NECAP1P2,RNU6-542P,RP11-287D1.3,SLC4A5,TAF13P2	S1(5.1)	0
chr3	64073039	64254500	181	3p14.1	1.552	PRDX3P4,PRICKLE2,PRICKLE2-AS1,PRICKLE2-AS2,PRICKLE2-AS3,RP11-129B22.1	S1(5)	0
chr8	30890500	31071500	181	8p12	0.68	PURG,RP11-363L24.3,RP11-473A17.1,WRN	S3(3.1)	0
chr12	25621500	25802500	181	12p12.1	0.029	IFLTD1,RP11-685B13.2	S1(4.7)	0
chr11	16779500	16960500	181	11p15.1	0.038	PLEKHA7,RN7SKP90	S3(3.1)	0
chr10	104678500	104859500	181	10q24.32	0.139	CNNM2,NT5C2	S1(5.3)	0
chr8	32784500	32965500	181	8p12	0.239	MTND1P6,MTND2P32,RANP9,RP11-11N9.4	S2(4.2)	0
chr12	121835500	122016500	181	12q24.31	0.254	ANAPC5,KDM2B,RNF34,RP11-711D18.2	G1(5.6)	0
chr3	132135500	132316080	181	3q22.1	1.18	ACAD11,DNAJC13,NPHP3	S1(5)	0
chr5	54603500	54784500	181	5q11.2	0.926	DHX29,PPAP2A,RP11-506H20.2,SKIV2L2	S1(4.7)	0
chr2	97777500	97958500	181	2q11.2	0.069	ANKRD36	S3(3.2)	0
chr9	14729500	14910993	181	9p22.3	0.029	FREM1,RNU6-1260P	S4(2.3)	0
chr3	99356500	99536677	180	3q12.1	3.865	AC055723.1,COL8A1,RP11-383I23.2	S1(4.9)	0.174		1			1
chr4	115107500	115287500	180	4q26	0.329		S1(4.7)	0
chr16	3414500	3594430	180	16p13.3	0.252	C16orf90,CLUAP1,LA16c-306E5.1,LA16c-306E5.3,MTRNR2L4,NAA60,NLRC3,RP11-433P17.2,RP11-433P17.3,ZNF174,ZNF597,ZSCAN32	S1(4.8)	0
chr4	14166078	14346500	180	4p15.33	0.055	RP11-669M16.1	S3(3.1)	0
chr2	42396500	42576500	180	2p21	1.432	AC083949.1,COX7A2L,EML4	S1(5.1)	0
chr11	122526500	122706500	180	11q24.1	1.536	UBASH3B,snoU13:37	G1(5.5)	0.151			1		1
chr7	98476500	98656500	180	7q22.1	0.819	AC004893.10,AC004893.11,MIR3609,SMURF1,TRRAP,snoU13:413	S1(4.5)	0
chr7	17158500	17338500	180	7p21.1	0.051	AC003075.4,AHR	S1(4.7)	0
chr7	89974500	90154500	180	7q21.13	0.372	AC006153.3,CDK14,CLDN12,CTB-13L3.1,GTPBP10	S2(4.2)	0
chr22	29279579	29458500	179	22q12.1	0.289	C22orf31,ZNRF3,ZNRF3-AS1,ZNRF3-IT1	S1(5)	0.13				1	1
chr3	141987500	142166904	179	3q23	0.903	AC109992.1,RNU1-100P,RNU6-1294P,XRN1	S2(4.2)	0
chr6	119491500	119670500	179	6q22.31	0.514	MAN1A1,RNU6-194P,RP3-354N19.3	S3(2.6)	0
chr9	132637500	132816500	179	9q34.11	0.981	FNBP1,GPR107,RP11-138E2.1,RP11-409K20.6,RP11-409K20.7,USP20	G1(5.6)	0
chr8	130850500	131029375	179	8q24.21	0.642	FAM49B,MIR5194,RNU7-181P,RP11-473O4.1,RP11-473O4.3,RP11-473O4.4,RP11-473O4.5,SNORA25:19	S1(5.2)	0
chr12	94675500	94854500	179	12q22	0.307	CCDC41,PLXNC1,RBMS2P1,RN7SL330P,RP11-1105G2.3	S3(3.1)	0
chr2	120770580	120949500	179	2q14.2	0.171	AC012363.4,EPB41L5	S1(4.8)	0
chr8	92937500	93116500	179	8q21.3	1.819	GS1-5L10.1,RUNX1T1	S3(2.9)	0
chr20	10655500	10834500	179	20p12.2	0.055	RP1-278O22.1,RP1-278O22.2,RP11-103J8.1	S2(4)	0
chr17	57500	236045	179	17p13.3	0.031	RP11-1260E13.1,RP11-1260E13.2,RP11-1260E13.3,RP11-1260E13.4,RPH3AL	S1(4.5)	0
chr15	67335500	67514500	179	15q22-23	2.054	AAGAB,RP11-342M21.2,RP11-798K3.2,SMAD3	G1(5.7)	0
chr7	41570500	41749500	179	7p14.1	1.366	AC005027.3,INHBA,INHBA-AS1	S1(4.5)	0
chr4	106629500	106808500	179	4q24	0.26	GSTCD,INTS12,RP11-45L9.1	S4(2.4)	0
chr2	186947960	187126646	179	2q32.1	0.177	AC104058.1,RPL23AP35	S3(2.7)	0
chr7	130616965	130795500	179	7q32.3	4.946	MKLN1,MKLN1-AS1,RNU6-1010P,RP11-138A9.2	G1(5.6)	1		2			2
chr17	8354500	8533500	179	17p13.1	0.663	MYH10,NDEL1,RN7SL129P,RNU7-43P,RP11-713H12.1,RP11-713H12.2	S2(4.3)	0
chr2	207310500	207489500	179	2q33.3	0.084	AC010731.2,ADAM23	S3(2.7)	0
chr20	4804291	4982500	178	20p13	0.514	SLC23A2,SNORA31:11,snoU13:212	S2(4.4)	0
chr9	90162500	90340433	178	9q21.33	0.022	DAPK1,DAPK1-IT1	S3(3.3)	0
chr2	70137500	70315500	178	2p13.3	0.219	ASPRV1,MXD1,PCBP1,PCBP1-AS1,RN7SL470P,snoU13:248,snoU13:249	G1(5.6)	0
chr17	26368500	26546310	178	17q11.2	1.288	AC061975.1,AC061975.9,AC100852.1,AC100852.2,NLK,RPS29P22,Vault:1	S1(4.5)	0
chr1	89149500	89327500	178	1p22.2	1.452	GTF2B,PKN2,RNU6-125P,RP11-76N22.2,TCEB1P19	S3(3.1)	0
chr1	10092500	10270862	178	1p36.22	0.712	PGAM1P11,RNU6-828P,RP11-496H15.2,UBE4B	S1(5.4)	0
chr1	84543500	84721500	178	1p31.1	0.579	PRKACB,RP11-486G15.1,RP11-486G15.2,RP11-82H13.2	S2(4.4)	0
chr2	96481963	96658500	177	2q11.1	0.101	ANKRD36C	S2(4)	0
chr5	143091500	143268500	177	5q31.3	0.019	CTB-57H20.1,CTB-70D19.1,HMHB1	S1(5)	0
chr1	52082500	52259636	177	1p32.3	1.192	GAPDHP51,NRD1,OSBPL9,SLC25A6P3,SNORA26:3	G1(5.6)	0
chr8	28747500	28924500	177	8p12-21	0.912	CTD-2647L4.4,HMBOX1,HMBOX1-IT1,INTS9,RNA5SP260	S2(4.4)	0
chr13	76445186	76622500	177	13q22.2	1.33	C13orf45,LINC00561,LINC01034,RP11-332E3.2	S2(3.7)	0
chr21	46494500	46671500	177	21q22.3	0.825	ADARB1,LINC00334,PRED57,PRED58	G1(5.6)	0
chr14	31750500	31927500	177	14q12	0.999	AL136418.1,CTD-2213F21.2,DTD2,HEATR5A,RP11-176H8.1,RP11-596D21.1	S1(5.1)	0
chr4	182890500	183066500	176	4q34.3	0.153	AC108142.1,RP11-402C9.1,TENM3	S2(3.5)	0
chr15	25507500	25683500	176	15q11.2	1.788	RP13-487P22.1,SNHG14:3,SNORD109B,SNORD115-45,SNORD115-47,SNORD115-48,UBE3A	S4(2.2)	0
chr17	27717500	27893069	176	17q11.2	1.864	ABHD15,MIR4523:1,MIR4523:2,RNU6-1034P,RNU6-711P,RP11-296K13.4,RP11-68I3.2,TAOK1	G1(5.5)	0
chr4	144258500	144434615	176	4q31.21	0.414	AC097658.1,GAB1,MIR3139,RP11-364L4.1,RP11-58H15.1,RP11-58H15.3	S3(3.3)	0
chr14	39944043	40120500	176	14q21.1	0.029	RP11-111A21.1	S3(3.2)	0
chr2	109150500	109326500	176	2q12.3	0.975	AC010095.5,AC010095.6,AC012487.2,LIMS1	S1(4.8)	0
chr20	46130500	46306644	176	20q13.12	1.493	AL021394.1,NCOA3,RP5-1049G16.4,SULF2	S1(5)	0
chr6	21981500	22157500	176	6p22.3	0.021	CASC14,CASC15,RN7SKP240	S3(2.9)	0
chr5	154061500	154237112	176	5q33.2	0.582	CTC-209L16.1,FAXDC2,LARP1,MIR1303,MIR378H,Metazoa_SRP:8,RN7SL439P	S1(4.8)	0
chr18	68096395	68272500	176	18q22.2	0.018	RN7SL795P,RPS2P6	S1(5)	0
chr17	17585500	17761582	176	17p11.2	0.398	MIR33B,RAI1,RAI1-AS1,RP1-253P7.1,SMCR5,SREBF1,TOM1L2	G1(5.6)	0
chr3	33318500	33494500	176	3p22.3	0.406	FBXL2,RNU7-110P,UBP1	S1(4.7)	0
chr2	214342500	214517500	175	2q34	0.018	SPAG16	S4(2.3)	0
chr10	28333500	28508500	175	10p12.1	0.027	MPP7,RP11-218D6.4	S2(4.3)	0
chr3	36421500	36596500	175	3p22.2-3	0.342	STAC	S3(3)	0
chr7	23335500	23510086	175	7p15.3	0.583	AC021876.4,IGF2BP3,MALSU1,RNU7-143P,SNORD65:3	S1(5)	0
chr15	65115500	65290500	175	15q22.31	0.239	AC069368.3,ANKDD1A,PIF1,PLEKHO2,RN7SL348P,SPG21	G1(5.6)	0
chr2	197503500	197678500	175	2q33.1	0.272	C2orf66,CCDC150,GTF3C3,SCARNA16:4	S2(4.4)	0
chr11	120207786	120382510	175	11q23.3	2.597	AP000758.1,ARHGEF12,GRIK4	S2(3.6)	0
chr19	21579920	21754500	175	19p12	0.196	CTD-2561J22.3,CTD-2561J22.5,CTD-2561J22.6,LINC00664,RP11-678G14.2,RP11-678G14.3,ZNF429,ZNF493	S4(1.9)	0
chr22	32149500	32324500	175	22q12.2-3	0.36	CTA-440B3.1,DEPDC5,RN7SL20P,RNU6-201P,RP1-180M12.1	S1(5.2)	0
chr2	71503500	71678500	175	2p13.2	1.319	RNU6-105P,ZNF638	S3(3.3)	0
chr17	44668034	44843500	175	17q21.31	0.354	NSF,RPS7P11,WNT3	S1(5)	0
chr3	119012500	119187784	175	3q13.33	1.024	ARHGAP31,ARHGAP31-AS1,RNU6-1127P,RPS26P21,TMEM39A	S1(4.5)	0
chr6	83600500	83775500	175	6q14.1	0.171	LAP3P1,RP11-445L13__B.3,UBE3D	S2(3.6)	0
chr17	25783500	25957500	174	17q11.1-2	0.186	AC015688.3,ITM2BP1,KSR1,LGALS9,RP11-19P22.8,RP11-720N19.1,RP11-720N19.2	S2(4.3)	0
chr1	19638640	19812500	174	1p36.13	2.754	CAPZB,PQLC2,RN7SL277P,RN7SL85P	S1(5.4)	0
chr15	56112500	56286500	174	15q21.3	1.454	NEDD4,snoU13:96	S2(4.1)	0
chr12	93149500	93323500	174	12q22	1.812	EEA1,HNRNPA1P50,PLEKHG7,RP11-603K19.1	S1(4.8)	0
chr2	196477500	196651500	174	2q32.3	0.53	DNAH7,RNU6-915P,SLC39A10	S2(4.3)	0
chr14	100438500	100612500	174	14q32.2	0.28	CTD-2376I20.1,EVL,MIR151B,MIR342,RP11-436M15.1,RP11-436M15.3	S1(5)	0
chr1	100817500	100991500	174	1p21.2	0.237	AC104457.1,BCAS2P2,CDC14A,RP5-837M10.4	S2(4.1)	0
chr10	127584500	127758500	174	10q26.2	0.142	ADAM12,DHX32,FANK1,FANK1-AS1,RP11-295J3.3	S2(3.7)	0.118	1				1
chr17	49024500	49198500	174	17q21.33	2.483	RP11-481C4.1,RP11-700H6.2,SPAG9,snoU13:141	S1(5.1)	0
chr15	34157026	34331377	174	15q14	0.597	AVEN,CHRM5,RP11-74D7.1,RYR3	S1(4.5)	0
chr12	49760500	49934876	174	12q13.12	0.67	KCNH3,RP11-161H23.10,RP11-161H23.8,SPATS2	G1(5.5)	1			1		1
chr11	35267500	35441610	174	11p13	0.179	AC090625.1,RP1-68D18.3,RP4-683L5.1,SLC1A2	G1(5.7)	0
chr4	2069500	2243891	174	4p16.3	0.215	COX6B1P5,HAUS3,NAT8L,POLN,RP11-317B7.2,RP11-317B7.3	S1(5)	0
chr2	39187483	39361500	174	2p22.1	0.875	AC019171.4,ARHGEF33,RNU6-198P,SOS1,SOS1-IT1,Y_RNA:463	S1(4.8)	0
chr7	116965500	117138500	173	7q31.2	0.023	AC000111.4,AC003045.1,ASZ1,CFTR	S2(4.2)	0
chr8	98881067	99053953	173	8q22.1-2	0.06	MATN2,RPL30	G1(5.5)	0
chr8	95314500	95487337	173	8q22.1	0.279	FSBP,RAD54B,RPS4XP10	S1(4.9)	0
chr2	73166500	73339500	173	2p13.2	0.598	RAB11FIP5,SFXN5	S1(5)	0
chr12	27676500	27849427	173	12p11.22-23	2.192	PPFIBP1,RP11-1060J15.3,RP11-1060J15.4,RP11-709A23.1,RP11-709A23.2	S1(5.3)	0
chr15	85524500	85697500	173	15q25.3	1.093	PDE8A	S1(5.1)	0
chr4	187476721	187649500	173	4q35.2	3.046	FAT1	S2(3.9)	0
chr8	28479500	28652500	173	8p21.1	0.219	EXTL3,EXTL3-AS1,INTS9	S2(4.2)	0
chr2	173728500	173901500	173	2q31.1	0.024	ALDH7A1P2,RAPGEF4	G1(5.5)	0
chr14	76617500	76790500	173	14q24.3	0.912	ESRRB,GPATCH2L,RP11-361H10.3,RP11-516J2.1	S3(3.4)	0
chr4	169758500	169931426	173	4q32.3	0.188	CBR4,PALLD,RNU6-853P,RNY4P17	G1(5.5)	0
chr18	9707500	9880500	173	18p11.22	0.749	RAB31,RN7SL862P,RNA5SP449,RP11-474N24.2,RP11-692N5.2	G1(5.6)	0
chr22	24666500	24839500	173	22q11.23	1.045	ADORA2A,ADORA2A-AS1,SPECC1L,SPECC1L-ADORA2A	G1(5.5)	0
chr4	119592500	119765500	173	4q26	5.373	METTL14,SEC24D	S1(4.9)	0
chr14	59778500	59951500	173	14q23.1	0.271	AL159140.1,DAAM1,GPR135,JKAMP,L3HYPDH,RP11-701B16.2	S1(4.5)	0
chr4	110947500	111120500	173	4q25	0.465	ELOVL6,RN7SL275P,RP11-115A14.1	S3(3.1)	0
chr11	76572500	76745441	173	11q13.5	0.329	ACER3,AP002498.1,B3GNT6,CTD-2547H18.1	S1(4.9)	0
chr1	225668500	225841500	173	1q42.12	4.882	ENAH	S1(5.2)	0
chr18	2655500	2828500	173	18p11.32	1.566	RP11-703M24.5,SMCHD1,Y_RNA:262,snoU13:146	S1(4.8)	0
chr1	169871500	170044500	173	1q24.2	0.742	AL356475.1,KIFAP3,MRPS10P1,RN7SL269P,RP11-332H17.1	S3(3.1)	0
chr4	37978500	38150500	172	4p14	0.544	MRPS33P2,RP11-177C12.4,TBC1D1	S1(4.9)	0
chr3	64500500	64672500	172	3p14.1	0.034	ADAMTS9,ADAMTS9-AS1,ADAMTS9-AS2	S2(4)	0
chr2	179957500	180129500	172	2q31.2	1.349	SESTD1,snoU13:261	S4(2.4)	0
chr6	17393500	17565500	172	6p22.3	0.873	CAP2,RPL7P26	S1(4.9)	0
chr1	65713901	65886247	172	1p31.3	0.144	DNAJC6,RNU2-15P,RP5-1044H5.1,RP5-1044H5.2	S3(3.4)	0
chrX	46446500	46618500	172	Xp11.23	0.892	CHST7,PGAM1P7,RP11-198M15.1,SLC9A7,YBX1P8	S1(5.1)	0
chr17	16945500	17117500	172	17p11.2	1.929	FLCN,MPRIP,MPRIP-AS1,PLD6,RN7SL775P,RNU6-767P,RP11-45M22.3,RP11-45M22.4	G1(5.6)	0
chr5	126194500	126366500	172	5q23.2	0.249	2014-03-03	S2(4.1)	0
chr2	210864500	211036500	172	2q34	0.205	AC006994.1,AC006994.2,AC006994.3,AC007038.7,KANSL1L,RP11-260M2.1,RPE	S4(2.1)	0
chr2	183731890	183903500	172	2q32.1	2.766	NCKAP1,RNU6-1122P,Y_RNA:453	S2(3.9)	0
chr12	89747048	89919500	172	12q21.33	0.229	CENPCP1,GALNT4,POC1B,RP11-1109F11.3,RP11-1109F11.5,RP11-734K2.4	S1(4.9)	0
chr3	189667500	189839500	172	3q28	0.246	LEPREL1,LEPREL1-AS1,MTAPP2,RN7SL486P	S1(5.2)	0
chr2	7057500	7229500	172	2p25.1-2	0.04	AC019048.1,RNF144A,RNF144A-AS1	S4(1.5)	0
chr3	194991896	195163500	172	3q29	1.37	AC069213.4,ACAP2,ACAP2-IT1,Y_RNA:516	S2(4.4)	0
chr2	157292500	157464500	172	2q24.1	0.626	AC011308.1,GPD2	S3(3)	0
chr11	74489500	74661500	172	11q13.4	0.439	AP001992.1,RN7SL239P,RNF169,RP11-147I3.1,SPCS2,XRRA1	S1(5.3)	0
chr8	79577500	79749763	172	8q21.12	0.317	IL7,PRKRIRP7,RP11-578O24.2,ZC2HC1A	S3(2.8)	0
chr5	74635500	74807500	172	5q13.3	0.999	COL4A3BP,CTD-2235C13.1,CTD-2235C13.3,HMGCR	S3(3.4)	0
chrX	34507500	34679500	172	Xp21.1	0.796	RP11-320J16.1,TMEM47	S3(2.7)	0
chr11	106527500	106699500	172	11q22.3	0.015	AP001282.1,GUCY1A2,RP11-819M15.1	S4(2.3)	0
chr5	271735	443272	172	5p15.33	0.898	AHRR,C5orf55,CTD-2083E4.5,CTD-2228K2.1,CTD-2228K2.2,PDCD6	S1(4.5)	0
chr1	186797500	186968500	171	1q31.1	0.195	PLA2G4A	S3(3.4)	0
chr1	42630389	42801500	171	1p34.2	1.491	FOXJ3,RP11-223A3.1	S2(3.7)	0
chr11	17059500	17230500	171	11p15.1	1.088	AC116533.1,AC116533.2,CTD-3236F5.1,NUCB2,OR7E14P,PIK3C2A,RNU6-593P,RP11-452G18.1,RPS13,SNORD14A,SNORD14B	S1(4.5)	0
chr21	28311500	28482500	171	21q21.3	0.036	ADAMTS5,AP001601.2,MIR4759	S2(3.5)	0
chr11	71975500	72146500	171	11q13.4	0.388	AP000593.6,AP000593.7,CLPB,RP11-45F15.1,RP11-45F15.2,RP11-7N14.1	S1(4.8)	0
chr15	75748183	75918810	171	15q24.2	0.976	AC105036.1,CTD-2026K11.3,CTD-2323K18.1,CTD-2323K18.2,CTD-2323K18.3,PTPN9,SNUPN	G1(5.5)	0
chr12	105181500	105352500	171	12q23.3	0.271	AC090051.1,SLC41A2,Y_RNA:76	S1(4.9)	0
chr6	152008500	152179500	171	6q25.1	0.021	ESR1,RP3-443C4.2	S3(3.1)	0
chr4	113206664	113377079	170	4q25	0.195	ALPK1,RTEL1P1,TIFA	S2(3.5)	0
chr2	164423500	164593500	170	2q24.3	0.445	FIGN	S4(2.2)	0
chr1	93646285	93816500	170	1p22.1	0.1	CCDC18,DR1,RP4-612C19.1,RP4-612C19.2,RP4-717I23.2,RP4-717I23.3	S1(5.4)	0.729		1			1
chr9	86153461	86323500	170	9q21.32	1.055	IDNK,RNU4-15P,RP11-522I20.3,UBQLN1	S3(3.4)	0
chr15	58872500	59042177	170	15q21.3	1.945	ADAM10,RN7SKP95,RP11-123C21.1,RP11-123C21.2,RP11-50C13.1,snoU13:98	S1(4.9)	0
chr8	103254847	103424500	170	8q22.3	3.463	KB-431C1.4,KB-431C1.5,UBR5,snoU13:420	S2(4.4)	0
chr5	176560500	176730774	170	5q35.2-3	1.626	CTD-2301A4.3,CTD-2301A4.5,MXD3,NSD1,RAB24	G1(5.5)	0
chr12	111866500	112036500	170	12q24.12	2.761	AC002395.1,ATXN2,RP11-686G8.1,SH2B3,U7:1	G1(5.5)	0
chr11	108168500	108338258	170	11q22.3	0.019	ATM,C11orf65	S2(3.9)	0
chr4	3076407	3246095	170	4p16.3	0.863	HTT	S1(4.8)	0
chr7	25064500	25233500	169	7p15.3	0.044	AC004129.7,C7orf31,CYCS	S1(5.1)	0
chr9	125860500	126029500	169	9q33.3	0.096	MIR600HG,RABGAP1,STRBP	S2(3.8)	0
chr6	107812500	107981500	169	6q21	0.034	RP1-67A8.3,SOBP	S2(3.8)	0
chr6	20044500	20213500	169	6p22.3	0.118	MBOAT1,RP11-239H6.2	S3(2.7)	0
chrX	53551500	53720500	169	Xp11.22	1.95	HUWE1,MIR98,MIRLET7F2	S2(4.3)	0
chrX	114299357	114468500	169	Xq23	0.094	LRCH2,RBMXL3,RPL36P18,SNORA35:3,YAP1P2,Y_RNA:788	S2(4)	0
chr5	77656500	77825500	169	5q14.1	0.631	LHFPL2,SCAMP1	S1(4.9)	0
chr1	117909500	118078500	169	1p12	0.862	MAN1A2	S2(3.9)	0
chr22	24407500	24576500	169	22q11.23	0.404	CABIN1,KB-318B8.7	G1(5.5)	0
chr9	98637500	98806500	169	9q22.32	0.96	ERCC6L2,LINC00092,LINC00476,RNA5SP289,RP11-72B4.2	S2(3.5)	0
chr5	121296500	121465207	169	5q23.1-2	0.594	CTC-441N14.2,LOX,SRFBP1	S1(5.2)	0
chr10	69666500	69835500	169	10q21.3	15.9	AL356741.1,HERC4,POU5F1P5,RN7SL220P,RP11-474D14.2,SIRT1	G1(5.6)	0
chr5	65017500	65186500	169	5q12.3	0.946	CTD-2353N24.1,NLN,SGTB	G1(5.6)	0
chr7	103109500	103278500	169	7q22.1	0.018	CTB-107G13.1,RELN,RN7SKP86	S2(4)	0
chr13	24295500	24464500	169	13q12.12	0.234	AL139080.1,C1QTNF9B-AS1,MIPEP,MTCO3P2	S1(5.2)	0
chr3	99189500	99358500	169	3q12.1	0.046	COL8A1,RP11-201E8.1,RP11-779P15.1,RP11-779P15.2	S1(4.9)	1		1			1
chr18	59246689	59416065	169	18q21.33	0.09	RP11-1096D5.1,RP11-1096D5.2,RP11-879F14.1,RP11-879F14.2	S2(4.3)	0
chr7	91875500	92044500	169	7q21.2	1.424	AC007566.11,ANKIB1	S1(4.7)	0
chr5	87564500	87733500	169	5q14.3	0.147	CTC-498M16.2,CTC-498M16.3,CTC-498M16.4,RNA5SP187,RPS3AP22,SNORA70:19,TMEM161B,TMEM161B-AS1	S4(1.7)	0
chr15	25683500	25852500	169	15q11-12	0.047	AC023449.2,AC124997.1,UBE3A	S3(2.9)	0
chr15	30916696	31085500	169	15q13.2	0.273	ARHGAP11B,GOLGA8UP,RP11-932O9.10,RP11-932O9.7,U8:11,Y_RNA:164	S3(3.3)	0
chr6	142621500	142790500	169	6q24.1	0.136	GPR126	S1(4.5)	0
chr9	15139500	15307500	168	9p22.3	0.367	RNU6-559P,RP11-54D18.3,TTC39B	S3(3.2)	0
chrX	102024088	102192199	168	Xq22.1	0.37	LINC00630,LL0XNC01-237H1.2,MTND1P32,MTND2P2,MTND4P32,MTND5P26,RP11-522L3.11,RP11-522L3.3,RP11-522L3.4,RP11-522L3.5,RP11-522L3.6,RP11-522L3.9	S3(2.9)	0
chr6	161527500	161695500	168	6q26	0.236	AGPAT4,MAP3K4	S3(3)	0
chr18	55302500	55470500	168	18q21.31	4.382	ATP8B1,RNU6-742P,RP11-35G9.3,RP11-35G9.5	G1(5.5)	0
chr18	44789500	44957500	168	18q21.1	0.202	CTD-2130O13.1,MIR4527	S4(2.4)	0
chr7	18989385	19157500	168	7p21.1	0.758	AC003986.6,HDAC9,TWIST1	S2(3.6)	0
chr1	182987500	183155372	168	1q25.3	4.26	LAMC1,RP11-181K3.4	G1(5.6)	0
chr1	25071500	25239500	168	1p36.11	6.126	CLIC4,RNU6-1208P,RUNX3	G1(5.6)	0
chr12	123466196	123634562	168	12q24.31	0.27	ARL6IP4,MIR4304,PITPNM2,RN7SL133P,RP11-197N18.2,RP11-197N18.7	G1(5.6)	0
chr5	108494500	108662070	168	5q21.3	0.186	CTD-2587M2.1,FER	S3(3.1)	0
chr9	26098500	26266500	168	9p21.2	0.045		S3(2.5)	0
chr12	47473500	47641906	168	12q13.11	0.43	AMIGO2,MIR4698,PCED1B,PCED1B-AS1,RP11-23J18.1,RP11-493L12.3	S1(5)	0
chr14	71555500	71722500	167	14q24.2	0.394	AC004817.1,PCNX,RP6-91H8.1,RP6-91H8.2,RP6-91H8.3,RP6-91H8.5	S1(5.1)	0
chr9	74264500	74431606	167	9q21.13	0.838	RP11-409O11.3,TMEM2	S3(3.1)	0
chr13	23734500	23901500	167	13q12.12	0.18	LINC00362,RNU6-58P,SDAD1P4,SGCG,TATDN2P3	S2(4.1)	0
chr3	12330500	12497500	167	3p25.2	0.088	AC091492.2,PPARG	S1(5)	0
chr1	44654721	44821500	167	1p34.1	0.392	AL390776.1,DMAP1,ERI3,ERI3-IT1	S1(4.7)	0
chr20	3221500	3388500	167	20p13	1.048	AL117334.1,C20orf194,RN7SL839P,RNU6-1019P,U3:35,UBE2V1P1	S1(5.1)	0
chr2	47143295	47310500	167	2p21	1.489	AC073283.7,AC093732.1,C2orf61,MCFD2,RP11-15I20.1,RP11-761B3.1,TTC7A	G1(5.7)	0
chr4	47486500	47653500	167	4p12	1.171	AC092597.3,ATP10D,CORIN,RP11-731J8.1	S2(4.2)	0
chr2	149401500	149568500	167	2q23.1	1.488	EPC2	S3(2.9)	0
chr17	65821500	65988500	167	17q24.2	0.919	AC006534.2,BPTF,C17orf58,RN7SL622P,RP11-855A2.3	S1(4.9)	0
chr7	32767500	32934500	167	7p14.3	0.068	AVL9,DPY19L1P1,DPY19L1P2,KBTBD2,MIR550A2,RP11-225B17.1,RP11-225B17.2,RP11-265E18.1,SNORA31:19,ZNRF2P1	S1(4.9)	0
chr1	179923500	180090500	167	1q25.2	1.464	CEP350,RP11-502H18.2,RP11-52I18.1,RP11-533E19.3,RP11-533E19.5	G1(5.5)	0.477				1	1
chr2	8977760	9144500	167	2p25.1	1.564	MBOAT2,snoU13:252	S1(4.9)	0
chr3	133802500	133969500	167	3q22.2	0.997	HMGB3P14,RYK	G1(5.5)	0
chrX	70586113	70752932	167	Xq13.1	0.451	AL590762.10,AL590762.11,AL590763.5,INGX,TAF1,Y_RNA:802,snoU13:465	S1(4.6)	0
chr13	114631817	114898500	167	13q34	0.55	RASA3,RASA3-IT1	S1(5.4)	0
chr3	51572500	51739500	167	3p21.2	0.69	RAD54L2,RNA5SP132,RNU6ATAC29P,TEX264	S2(4.3)	0
chr12	47248500	47415500	167	12q13.11	0.037		S1(5)	0
chr10	101603500	101770500	167	10q24.2	3.865	ABCC2,DNMBP,DNMBP-AS1	S1(5.3)	0
chr2	48756521	48923500	167	2p16.3	0.139	AC073082.3,GTF2A1L,LHCGR:1,LHCGR:2,STON1,STON1-GTF2A1L	S3(3.3)	0
chr4	177240500	177407500	167	4q34.2	0.528	RP11-87F15.2,SPCS3	S1(5.4)	0
chr14	90255500	90422500	167	14q32.11	0.147	EFCAB11,RAB42P1,RP11-33N16.3,TDP1	S1(4.9)	0
chr1	10532344	10699500	167	1p36.22	0.848	CASZ1,DFFA,PEX14,RN7SL614P,RP4-734G22.3	S1(5.1)	0
chr16	12731500	12898500	167	16p13.12	0.708	CPPED1,CTD-2583P5.1,CTD-2583P5.3,MIR4718	S3(3.1)	0
chr13	44984500	45151500	167	13q14.11	2.587	RP11-71C5.2,TSC22D1	S1(4.9)	0
chr13	28712500	28879500	167	13q12.2	1.391	EEF1A1P3,FLT1,PAN3,RNU6-82P	S2(4.3)	0
chr12	26107500	26274923	167	12p12.1	4.113	BHLHE41,RASSF8,RASSF8-AS1	S1(4.6)	0
chr11	44117098	44284500	167	11p11.2	0.949	ALX4,EXT2	S2(3.9)	0
chr8	93811500	93978500	167	8q22.1	0.39	AC117834.1,CTD-3239E11.2,RP11-100L22.2,TRIQK	S4(2.2)	0
chr18	23806500	23972500	166	18q11.2	0.099	FAM60BP,RNU6-1289P,RP11-107K17.2,RP11-25D3.1,TAF4B,U3:24	S4(2.4)	0
chr13	32182500	32348500	166	13q12-13	0.109	RXFP2	S2(4.2)	0
chr10	30345500	30511500	166	10p11.23	0.089	KIAA1462	S1(4.7)	0
chr22	30278500	30444500	166	22q12.2	1.077	AC003681.1,CNN2P1,CTA-85E5.10,MTMR3,RNU6-331P	G1(5.6)	0
chr1	93645475	93811444	166	1p22.1	0.345	CCDC18,RP4-612C19.1,RP4-612C19.2,RP4-717I23.2,RP4-717I23.3,TMED5	S1(5.4)	0.752		1			1
chr16	4000445	4166500	166	16p13.3	0.634	ADCY9,RP11-462G12.4	S1(5.3)	0
chr1	58846500	59012500	166	1p32.1-2	0.098	DAB1,OMA1	S2(4.2)	0
chr1	86696500	86862500	166	1p22.3	0.449	ODF2L	S2(3.5)	0
chr13	34391500	34557500	166	13q13.2	0.216	AL161891.1,RFC3,RNU5A-4P	S2(3.5)	0
chr15	43232556	43398500	166	15q15.2	1.085	EPB42,UBR1	S1(5)	0
chr10	33012500	33178239	166	10p11.22	0.189	C10orf68,RP11-479G22.8	S1(5.2)	0
chr2	18059500	18225500	166	2p24.2	0.049	KCNS3,SNORA40:13	S3(2.9)	0
chr13	31027500	31192500	165	13q12.3	0.141	HMGB1,MFAP1P1,PTPN2P2,RBM22P2,USPL1	S1(5.2)	0
chr4	54794305	54959500	165	4q12	2.621	AC110792.1,CHIC2,FIP1L1,MORF4L2P1,RP11-571I18.2,RP11-571I18.4,RPL21P44	G1(5.5)	0
chr10	123872500	124037500	165	10q26.13	0.291	BTBD16,TACC2	S2(3.7)	0
chr2	99060500	99225041	165	2q11.2	0.373	COA5,INPP4A	S3(3.2)	0
chrX	47695500	47860500	165	Xp11.23	0.179	RPL7P57,ZNF182,ZNF630,ZNF81	S3(3.2)	0
chr7	152456500	152621500	165	7q36.1-2	0.15	ACTR3B	S3(2.6)	0
chr3	112995500	113160457	165	3q13.2	0.186	BOC,RP11-553D4.2,WDR52,WDR52-AS1	S2(3.8)	0
chr15	48938046	49103343	165	15q21.1	0.21	CEP152,RP11-227D13.1,RP11-227D13.2,RP11-227D13.4,RP11-485O10.2,RP11-485O10.3	G1(5.6)	0
chr12	14517500	14682500	165	12p13.1	1.6	ATF7IP,PLBD1,RPL30P11	S4(2.2)	0
chr1	93811444	93976500	165	1p22.1	0.665	DR1,FNBP1L,RNA5SP53,RP4-713B5.2,RP4-717I23.3,Y_RNA:325	G1(5.5)	0
chr17	16119500	16284111	165	17p11.2	0.308	CENPV,MIR1288,NCOR1,PIGL	S1(5.4)	0
chr8	118293500	118458500	165	8q24.11	0.017	SNORA31:22	S1(4.5)	0
chr1	145206500	145371500	165	1q21.1	0.217	NBPF10,NOTCH2NL,RP11-458D21.5	S1(5.3)	0
chr5	179334859	179499500	165	5q35.3	0.283	CTC-563A5.2,CTC-563A5.4,MIR340,RNF130,RPS15AP18	S1(4.7)	0
chr4	39814500	39979500	165	4p14	2.106	PABPC1P1,PDS5A,RNA5SP159,RP11-333E13.2,TCEB1P33	S1(5.1)	0
chr6	126661319	126825500	164	6q22.32	0.107	CENPW,MIR588	S3(2.9)	0
chr2	149143500	149307500	164	2q23.1	0.701	MBD5	S3(2.7)	0
chr2	242295657	242459500	164	2q37.3	0.652	AC110299.5,FARP2,MIR3133,STK25	S1(5.3)	0
chr10	11489500	11653500	164	10p14	0.299	RP11-138I18.1,USP6NL	S3(3.2)	0
chr1	11159938	11323500	164	1p36.22	0.72	ANGPTL7,MTOR,MTOR-AS1,RNU6-291P,RNU6-537P,RP4-635E18.6,RPL39P6,snoU13:192	S1(4.7)	0
chr15	101459419	101623500	164	15q26.3	0.596	LRRK1,RP11-505E24.2,RP11-505E24.3,RP11-66B24.4	S1(5.2)	0
chr5	139780500	139944040	164	5q31.3	1.025	ANKHD1,ANKHD1-EIF4EBP3,APBB3,CTC-329D1.2,EIF4EBP3,SNORD45:2,SRA1	S1(5.3)	0
chr20	32077500	32241500	164	20q11.21-22	0.826	CBFA2T2	S1(5)	0
chr10	69831500	69995500	164	10q21.3	1.046	ATOH7,HERC4,MYPN,RN7SKP202,RP11-153K11.3	G1(5.6)	0
chr14	100841500	101005275	164	14q32.2	0.403	BEGAIN,CTD-2062F14.2,RN7SKP92,RP11-362L22.1,WARS,WDR25	S1(4.8)	0
chr7	102389500	102553437	164	7q22.1	0.08	FAM185A,FBXL13,RN7SKP198,RNU6-1136P,RP11-577H5.1	G1(5.5)	0
chr5	72251807	72416118	164	5q13.2	1.125	CTC-250P20.1,CTC-250P20.2,FCHO2,Y_RNA:589	S1(5)	0
chr6	11173684	11336500	163	6p24.2	0.034	NEDD9,RP3-510L9.1	S2(4.1)	1			1		1
chrX	14661500	14824500	163	Xp22.2	0.082	AC003658.1,GLRA2	S2(3.7)	0
chr5	121647500	121810500	163	5q23.2	0.174	CTC-210G5.1,CTD-2280E9.1,CTD-2544H17.1,SNCAIP	S2(4.3)	0
chr11	108092500	108255500	163	11q22.3	0.692	AP001925.1,ATM,C11orf65,NPAT,Y_RNA:56	S2(3.6)	0
chr16	3767598	3930500	163	16p13.3	1.83	CREBBP,RP11-95J11.1	S1(5.3)	0
chr2	175870097	176033110	163	2q31.1	1.471	AC007435.1,AC096649.2,ATF2,MIR933,RNU6-1290P,RNU6-763P,RP11-6C10.1	S1(4.5)	0
chr3	47047500	47210500	163	3p21.31	1.91	KIF9-AS1,NBEAL2,NRADDP,SETD2,snoU13:296	S1(5.4)	0
chr11	33563617	33726500	163	11p13	0.874	C11orf91,CD59,KIAA1549L,RP4-541C22.5	G1(5.5)	0
chr11	68228185	68391500	163	11q13.2	1.992	AP000807.1,AP000807.2,AP003096.1,CTD-2007L18.5,NDUFA3P2,PPP6R3	S1(5)	0
chr1	63897500	64060500	163	1p31.3	0.149	ALG6,DLEU2L,EFCAB7,ITGB3BP,PGM1,RN7SL488P,RNU7-123P	S2(3.7)	0
chr6	126498338	126661319	163	6q22.32	0.026	PPP1R14BP5,RP11-527F13.1	S3(3.2)	0
chr2	36710500	36873230	163	2p22.2	1.548	AC007401.1,AC007401.2,CRIM1,FEZ2,RP11-78I14.1	S1(5.3)	0.281		2			2
chr12	106751435	106914500	163	12q23.3	0.583	POLR3B,RP11-144F15.1	S2(3.6)	0
chr4	169239958	169402500	163	4q32.3	0.437	DDX60L,SNORA51:7	S1(5.1)	0
chrX	123094061	123257500	163	Xq25	1.286	RP1-315G1.3,STAG2	S2(4.1)	0
chr17	28256500	28419500	163	17q11.2	0.042	AC104984.4,AC104996.1,EFCAB5,RNY4P13,RP11-1148O4.1,RP11-1148O4.2,RP11-338L22.3,SSH2	S1(4.9)	0
chr6	145894500	146057160	163	6q24.3	0.108	EPM2A,RP3-466P17.1	S3(3.2)	0
chr3	32997500	33160500	163	3p22.3	0.551	AC112211.3,CCR4,CRTAP,GLB1,RN7SL296P,SEC13P1,TMPPE	S1(4.5)	0
chr6	97568500	97731500	163	6q16.1	0.486	KLHL32,MMS22L,RP3-418C23.2	S3(2.5)	0
chr15	42867856	43031315	163	15q15.2	0.107	CDAN1,RP11-265N6.4,STARD9,TTBK2,snoU13:94	S1(5.2)	0
chr12	93609450	93771512	162	12q22	0.038	RP11-486A14.1,RP11-486A14.2,RP11-511B23.2,SNORD74:3,snoU13:50,snoU13:59	S1(5)	0
chr9	130213684	130375500	162	9q33-34	0.839	FAM129B,LRSAM1,STXBP1,Y_RNA:735	G1(5.7)	0
chr11	15122500	15284500	162	11p15.2	0.072	INSC	S2(3.7)	0
chr21	37530500	37692486	162	21q22.12	0.132	AP000692.10,DOPEY2,RN7SL73P,RPL3P1,SRSF9P1,snoU13:218	S1(5.3)	0
chr19	41277552	41439500	162	19q13.2	0.162	CTC-490E21.10,CTC-490E21.12,CTC-490E21.13,CYP2A6,CYP2A7,CYP2B7P1,CYP2F1P,CYP2G1P,CYP2T2P,EGLN2,MIA,MIA-RAB4B,RAB4B,RAB4B-EGLN2	S1(5.2)	0
chr15	56374500	56536500	162	15q21.3	1.663	RFX7,RP11-5N19.3,TEX9	S2(4.1)	0
chr17	57022500	57184282	162	17q22	0.711	AC099850.1,AC100832.1,PPM1E,RN7SL716P,RP11-579O24.3,TRIM37	S3(3.4)	0
chr2	238161500	238323018	162	2q37.3	3.566	AC112715.2,COL6A3	G1(5.8)	0
chr9	3525500	3687500	162	9p24.2	0.089	RFX3,RP11-509J21.1,RP11-509J21.2,RP11-509J21.3,RP11-509J21.4	S2(4.1)	0
chrX	80456500	80618766	162	Xq21.1	0.462	AL357115.1,HMGN5,SH3BGRL	G2(1.4)	0
chr17	20059500	20221500	162	17p11.2	0.247	AC004702.2,RNU6-1057P,SPECC1	S3(3.4)	0
chr2	55177500	55339757	162	2p16.1	7.103	AC093165.1,EML6,RNU6-433P,RTN4	G1(5.7)	0
chr10	94172500	94334500	162	10q23.33	0.679	AL161652.1,IDE,MARK2P9	S1(5)	0
chr6	126101500	126263500	162	6q22.32	0.431	NCOA7,NCOA7-AS1,RN7SKP56	S1(4.6)	0
chr11	57480071	57641500	161	11q12.1	1.416	AP000662.9,BTBD18,C11orf31,CTNND1,OR5BA1P,RP11-691N7.6,RP11-734C14.2,TMX2,TMX2-CTNND1	S1(4.7)	0
chr14	51955817	52116500	161	14q22.1	0.23	FRMD6,FRMD6-AS2,RNU6-1033P,RNU6-1291P	G1(5.7)	0
chr1	185126211	185286910	161	1q25.3	0.156	CTA-253N17.1,IVNS1ABP,RP4-635A23.3,RP4-635A23.4,RPL5P5,SWT1,Y_RNA:302,Y_RNA:303,Y_RNA:341	S2(4)	0
chr7	136552500	136713500	161	7q33	0.476	CHRM2,KRT8P51,MIR490,hsa-mir-490	S1(4.7)	0
chr11	73720480	73881500	161	11q13.4	0.343	C2CD3,RP11-691F15.1	S1(5.3)	0
chr10	71560500	71721500	161	10q22.1	0.417	AC025426.1,AL138925.1,COL13A1	S1(5)	0
chr10	90775592	90936500	161	10q23.31	0.348	MIR4679-2,RP11-341B24.3,RP11-399O19.9,snoU13:19	S1(5.1)	0
chr1	206482500	206643790	161	1q32.1	0.586	RP11-421E17.4,SRGAP2,SRGAP2-AS1	S1(5.3)	0
chr16	19566561	19727777	161	16p12.3	0.614	AC002550.5,C16orf62,KNOP1	S3(3.2)	0
chr15	82394500	82555500	161	15q25.2	0.897	EFTUD1,FAM154B,RNU1-77P	S1(4.7)	0
chr14	65380500	65541500	161	14q23.3	0.421	AL139022.1,CHURC1,CHURC1-FNTB,FNTB,GPX2,MAX,MIR4706,RAB15,RP11-840I19.5	S1(4.8)	0
chr10	27792500	27953500	161	10p12.1	1.352	RAB18	S2(3.6)	0
chr4	186130500	186291878	161	4q35.1	1.256	KIAA1430,LRP2BP,SNX25	S3(3.1)	0
chr6	131455500	131616500	161	6q23.2	0.281	AKAP7,RP1-209B5.2	S1(5)	0
chr12	109549022	109710500	161	12q24.11	0.061	ACACB,RP11-968O1.5	S2(4)	0
chr12	102270500	102430500	160	12q23.2	0.41	CCDC53,DRAM1,RP11-512N21.1,RP11-512N21.3,RP11-554E23.2,RP11-554E23.3	S2(4.3)	0
chr1	17866500	18026500	160	1p36.13	0.597	ARHGEF10L	S2(4.1)	0
chr19	33852354	34012500	160	19q13.11	0.211	CEBPG,PEPD	S3(3.1)	0
chr9	116917500	117077500	160	9q32	0.138	COL27A1,MIR455	S1(5.3)	0
chr7	105516500	105676500	160	7q22.3	0.186	ATXN7L1,CDHR3	S1(4.8)	0
chr10	181500	341500	160	10p15.3	0.819	AL603831.1,DIP2C,RNA5SP297,RNA5SP298,ZMYND11	S2(4)	0
chr4	140214500	140374385	160	4q31.1	1.436	ACA64:4,NAA15,NDUFC1,RNU6-1214P,RP11-83A24.1,RP11-83A24.2	S1(5.4)	0
chr15	100106500	100266500	160	15q26.3	2.655	DKFZP779J2370,LYSMD4,MEF2A,Y_RNA:179	S2(4.1)	0
chr18	74047500	74207500	160	18q23	0.919	RP11-17M16.1,RP11-17M16.2,RP11-504I13.3,ZNF516	S2(3.6)	0
chr4	10117500	10277500	160	4p16.1	0.024	AC006499.4,AC006499.5,AC006499.6,AC006499.7,AC006499.8,AC006499.9,RNA5SP155,RP11-480G3.1,WDR1	S3(3.2)	0
chr6	161412500	161572500	160	6q26	1.758	AGPAT4,MAP3K4,RP3-428L16.2	S3(3)	0
chr15	52121824	52281500	160	15q21.2	1.57	LEO1,MAPK6,RP11-56B16.1,RP11-56B16.2,RP11-56B16.4,RP11-56B16.5,TMOD3,U6:4,Y_RNA:172	S1(5.2)	0
chr19	47363500	47523076	160	19q13.32	2.639	ARHGAP35,snoU13:160	G1(5.7)	0
chr10	33268500	33428500	160	10p11.22	0.083	AL121748.1,ITGB1,RN7SL847P,RP11-342D11.3,RP11-462L8.1,RP11-462L8.2,RP11-479G22.6,RP11-479G22.7	G1(5.6)	0
chr15	83494500	83654661	160	15q25.2	0.098	HOMER2,RP11-382A20.5,WHAMM	S2(3.6)	0.02		1			1
chr2	68693500	68853500	160	2p13.3	0.128	AC130709.1,APLF,FBXO48	S2(4.4)	0
chr1	119682500	119842500	160	1p12	0.157	RP11-418J17.1,RP11-418J17.2,RP11-418J17.3,WARS2,snoU13:169	S3(2.6)	0
chr10	24852500	25012500	160	10p12.1	2.842	ARHGAP21,RNA5SP305	S1(4.6)	0
chr4	71569920	71729500	160	4q13.3	0.875	GRSF1,RNU6-459P,RNU6-891P,RP11-46J23.1,RUFY3,snoU13:319	S1(4.8)	0
chr12	62653500	62813500	160	12q14.1	1.786	FAM19A2,RNU6-595P,USP15	S2(3.9)	0
chr9	6382500	6542500	160	9p24.1	1.812	C9orf38,GLDC,RN7SL25P,RP11-307L3.4,UHRF2	S1(4.7)	0
chr6	79627500	79787500	160	6q14.1	1.157	AL356776.1,IRAK1BP1,PHIP,RP11-477E3.2	S4(2.4)	0
chr3	153837500	153997500	160	3q25.2	0.058	ARHGEF26,ARHGEF26-AS1,DHX36	S4(2.1)	0
chr6	129873732	130032500	159	6q22.33	2.257	ARHGAP18	S1(5.3)	0
chr13	40229500	40388500	159	13q14.11	0.67	COG6,MIR4305,RNY4P14	S3(3)	0
chrX	63207500	63366932	159	Xq11.2	0.018	HNRNPDP1,RP11-403E24.1	S4(1.9)	0
chr3	149530500	149689065	159	3q25.1	1.056	ANKUB1,NPM1P29,PFN2,RNF13,RNU6-720P	S1(5.2)	0
chr14	26909500	27068500	159	14q12	0.021	NOVA1,NOVA1-AS1,RP11-483C6.1	G2(1.3)	0
chr7	77166500	77325759	159	7q11.23	2.619	PTPN12,RSBN1L-AS1	S1(5.1)	0
chr12	1639056	1797739	159	12p13.33	3.64	FBXL14,MIR3649,WNT5B	G1(5.6)	0
chr4	119115906	119274500	159	4q26	0.5	NDST3,PRSS12,SNHG8	S2(4.3)	0
chr4	177554382	177713881	159	4q34.3	15.413	RP11-313E19.2,VEGFC	S1(5.2)	0
chr13	27131500	27290500	159	13q12.13	1.289	RPS3AP44,WASF3,WASF3-AS1	S2(3.5)	0
chr20	45831500	45990500	159	20q13.12	1.417	AL031666.1,AL031666.2,RN7SL243P,RP4-569M23.2,RP4-569M23.4,ZMYND8	G1(5.6)	0
chr5	54672500	54831500	159	5q11.2	1.509	MIR5687,PPAP2A,RNF138P1,SKIV2L2	S1(4.9)	0
chr2	24424567	24583500	159	2p23.3	0.616	AC009228.1,HMGN2P20,ITSN2,RPL36AP13,SCARNA21:3	S1(4.7)	1			1		1
chr12	64640500	64799500	159	12q14.2	0.734	C12orf56,RP11-114F3.2,RP11-290I21.2,RPS11P6,XPOT,snoU13:55	S1(5.3)	0
chr20	25407500	25566153	159	20p11.21	0.269	GINS1,NINL	S1(5.1)	0
chr1	162601162	162760491	159	1q23.3	3.296	DDR2,RN7SL861P	S1(5.4)	0
chr7	36192500	36351500	159	7p14.2	0.055	AC006960.5,AC007327.5,AC007327.6,EEPD1	S2(4.2)	0
chrX	77166193	77325500	159	Xq21.1	0.242	ATP7A,PGAM4,PGK1,RP5-1000K24.2	S2(3.7)	1				1	1
chr1	120453236	120611500	158	1p11-12	2.356	NOTCH2	G1(5.6)	0
chr7	37960500	38118500	158	7p14.1	0.089	EPDR1,SFRP4	S4(1.7)	0
chr18	5385329	5543500	158	18p11.31	0.138	EPB41L3,RP11-286N3.1	S4(2)	0
chr22	21054500	21212500	158	22q11.21	0.644	AC007308.6,PI4KA,SERPIND1,TMEM191A	S1(5.2)	0
chr10	31450500	31608500	158	10p11.22	0.107	RNA5SP309,RP11-192P3.4,ZEB1,ZEB1-AS1	S1(5.4)	0
chr14	58461243	58619500	158	14q23.1	0.136	C14orf37,RP11-349A22.2,UBA52P3	S2(3.8)	0
chr6	15505500	15663500	158	6p22.3	0.395	DTNBP1,JARID2	S3(2.6)	0
chr15	57883500	58041500	158	15q21.3	0.14	GCOM1,MYZAP,POLR2M,RP11-344A16.2	S2(4)	0
chr1	245132500	245290500	158	1q44	0.144	EFCAB2,RNU6-1089P,RNU6-999P,RP11-156E8.1,RP11-290P14.2	S2(3.7)	0
chrX	40944500	41102500	158	Xp11.4	2.767	RP5-1172N10.4,USP9X	S1(4.8)	0
chr11	110424500	110582500	158	11q23.1	0.1	ARHGAP20	S2(4.1)	0
chr3	99822500	99980500	158	3q12.1	0.193	CMSS1,FILIP1L,RP11-15N24.4,SNORD61:1,TBC1D23,TMEM30C,VTI1BP1	S1(5.3)	0
chr10	89419500	89577684	158	10q23.2-31	1.122	ATAD1,PAPSS2,RP11-57C13.3	S1(5.2)	0
chr6	13328815	13486500	158	6p23-24	0.169	AL583828.1,GFOD1	S2(3.7)	0
chr6	47445500	47603500	158	6p12.3	1.186	CD2AP,RP11-812I20.2,Y_RNA:627	S4(2.2)	0
chr6	125283500	125440500	157	6q22.31	0.97	RNF217,RP11-510H23.1,TPD52L1	S2(4)	0
chr3	120166500	120323500	157	3q13.33	0.209	AC126182.1,FSTL1,NDUFB4,RP11-359H3.1,RP11-359H3.4	S1(5.2)	0
chr12	39680500	39837500	157	12q12	0.153	AC121334.1,KIF21A	S4(1.5)	0
chr10	10839500	10996500	157	10p14	0.026	LINC00710	S2(3.6)	0
chr9	71736208	71893500	157	9q21.11	0.351	AL358113.1,TJP2	S1(4.5)	0
chr2	151322500	151479500	157	2q23.3	0.024	AC104777.1,AC104777.2,AC104777.3,AC104777.4,RND3	S1(5.4)	0
chr10	131934662	132091500	157	10q26.3	0.49	GLRX3	S4(2.3)	0.523		1			1
chr16	74483790	74641012	157	16q23.1	1.148	GLG1,RNU6-237P,RP11-572F4.1,Y_RNA:217	S1(4.7)	0
chr2	160761260	160918500	157	2q24.2	0.596	PLA2R1	S1(4.6)	0
chr1	180835500	180992500	157	1q25.3	0.482	AL162431.1,KIAA1614,RP11-46A10.2,RP11-46A10.4,RP11-46A10.5,RP11-46A10.6,RP11-46A10.8,STX6,XPR1	S1(5.3)	0
chr18	32285500	32442500	157	18q12.1	0.034	AC068506.1,DTNA,RP11-138H11.1	S3(3.1)	0
chr7	32611500	32768500	157	7p14.3	0.083	AVL9,DPY19L1P1,ZNRF2P1	S1(4.5)	0
chr4	174291119	174448420	157	4q34.1	0.105	HAND2,RNU6-1096P,RP11-489G11.3,RP11-798M19.6,RPL5P11,SAP30,SCRG1	S2(4.2)	0.269		1			1
chr12	110561500	110718560	157	12q24.11	0.301	IFT81	G1(5.7)	0
chr7	114562500	114719011	157	7q31.1-2	1.211	AC068610.5,MDFIC	S2(3.8)	0
chr10	112679300	112836789	157	10q25.2	2.795	MIR548E,RPL13AP6,SHOC2	S3(3.4)	0
chr5	125686500	125843500	157	5q23.2	3.223	GRAMD3,RP11-517I3.1	S1(5.4)	0
chr8	145754516	145911500	157	8q24.3	0.123	AC084125.1,AC084125.2,AC084125.3,ARHGAP39,CTD-2517M22.9	S1(5.1)	0
chr18	56530500	56687500	157	18q21.32	0.768	OACYLP,RNU2-69P,ZNF532	S1(5)	0
chr2	65506500	65662500	156	2p14	1.23	AC012370.2,SPRED2	S1(4.9)	0
chr9	26946500	27102627	156	9p21.2	0.253	IFT74,LRRC19,PLAA,RP11-337A23.3	S2(3.9)	0
chr1	173176452	173332872	156	1q25.1	0.114	RP11-296O14.1,RP11-296O14.2,snoU13:176	S1(4.9)	0
chr15	35683500	35839500	156	15q14	0.345	DPH6,DPH6-AS1,HNRNPA1P45,RP11-139F4.2	S2(3.9)	0
chr16	28067500	28223500	156	16p11-12	1.956	GSG1L,SNORA25:9,TPRKBP2,XPO6,Y_RNA:200	S2(4.1)	0
chr11	14386052	14542500	156	11p15.2	1.653	COPB1,PSMA1,RNU7-49P,RP11-140L24.3	G1(5.7)	0
chr2	10675500	10831500	156	2p25.1	0.968	AC092687.5,NOL10,RN7SL832P	S1(5)	0
chr12	122751068	122907500	156	12q24.31	1.685	CLIP1,RP11-450K4.1,RP11-512M8.3,RPL21P1	G1(5.6)	0
chr10	111764500	111920500	156	10q25.1-2	2.619	ADD3,SNRPGP12	S1(5.2)	0
chr2	64090500	64246500	156	2p14-15	1.169	ACA59:3,UGP2,VPS54	S1(4.5)	0
chr10	50632500	50788500	156	10q11.23	1.761	ERCC6,ERCC6-PGBD3,PGBD3,RP11-123B3.2,RP11-140C5.3	S2(3.8)	0
chr7	137531838	137687500	156	7q33	6.421	AC022173.2,AKR1D1,CREB3L2	S1(5.1)	0
chr7	30811500	30967500	156	7p14.3	0.108	AC004691.5,AQP1,FAM188B,INMT-FAM188B	S2(3.9)	0
chr7	73869500	74025500	156	7q11.23	0.282	AC004851.1,GTF2IRD1,RNA5SP233,RP5-1186P10.2	G1(5.6)	0
chr17	11924500	12080500	156	17p12	1.401	MAP2K4,MIR744,RNU11-2P,RP11-471L13.3,RPL21P122	S3(3.3)	0
chr10	61509500	61665500	156	10q21.2	0.589	CCDC6,LINC00948	S4(2.3)	0
chr8	42241500	42397500	156	8p11.21	1.921	RP11-1007J8.1,RP11-503E24.2,SLC20A2,SMIM19,VDAC3	S1(5.2)	0
chr13	41706500	41861500	155	13q14.11	0.029	CALM2P3,KBTBD6,KBTBD7,MORF4L1P4,MTRF1,snoU13:71	S1(5.3)	0
chr9	108456500	108611990	155	9q31.2	0.098	RP11-18B3.2,RP11-18B3.3,TMEM38B	S3(3.1)	0
chr2	239335382	239490500	155	2q37.3	0.502	AC016999.2,AC092619.1,ASB1	S1(4.8)	1				1	1
chr15	42565500	42720500	155	15q15.1	0.417	CAPN3,GANC,RNU6-188P,RP11-164J13.1,RP11-546B15.2,TMEM87A,ZNF106	S1(5.2)	0
chr3	127387500	127542500	155	3q21.3	1.047	ABTB1,MGLL,PODXL2	S1(5.1)	0
chr3	156388500	156543269	155	3q25.31	5.312	LINC00886,METTL15P1,PA2G4P4,TIPARP,TIPARP-AS1	S1(5.2)	0
chr7	129438500	129593500	155	7q32.2	1.436	RP11-306G20.1,UBE2H	G1(5.5)	0
chr5	52855500	53010500	155	5q11.2	1.213	AC024569.1,NDUFS4	S1(4.7)	0
chr1	55525500	55680500	155	1p32.3	1.847	PCSK9,USP24	S1(4.9)	0
chr16	75313500	75468500	155	16q23.1	0.816	CFDP1,RNU6-758P,RP11-252K23.1,RP11-252K23.2,RP11-77K12.1,SNORA76:1	G1(5.6)	0
chr4	125479589	125634500	155	4q28.1	0.885	ANKRD50	S3(3.1)	0
chr14	58893500	59048500	155	14q23.1	0.384	HNRNPCP1,HSBP1P1,KIAA0586,RP11-517O13.1,RPL9P5,TIMM9,Y_RNA:136	S2(4.4)	0
chr11	86511500	86666660	155	11q14.2	0.641	AP000654.4,AP000654.5,FZD4,OR7E13P,OR7E2P,PRSS23,RP11-736K20.5	G1(5.5)	0
chr10	118609716	118764500	155	10q25.3	0.453	ENO4,KIAA1598	S3(3.1)	0
chr20	32950500	33104213	154	20q11.22	2.925	CDC42P1,FDX1P1,ITCH,ITCH-AS1,ITCH-IT1,MIR644A,Y_RNA:383	G1(5.6)	0
chr7	27548500	27702500	154	7p15.2	0.603	HIBADH	S1(4.9)	0
chrX	72783500	72937500	154	Xq13.2	0.205	CHIC1	S3(3.1)	0
chr17	33905064	34058667	154	17q12	1.812	AP2B1,CTC-507E2.1,CTC-507E2.2,PEX12,RPL17P42	S1(4.8)	0
chr10	126150500	126304500	154	10q26.13	0.064	LHPP,RPS10P18	S2(4.4)	0
chr16	80182500	80336500	154	16q23.2	0.032	RP11-525K10.1,RP11-525K10.2,RP11-525K10.3	S3(3.1)	0
chr6	116421500	116575335	154	6q22.1	0.269	AL121963.1,COL10A1,NIP7P3,NT5DC1,RP3-486I3.5,TSPYL4	S2(4.4)	0
chr18	55288500	55442500	154	18q21.31	0.049	ATP8B1,NARS,RNU6-742P,RP11-35G9.3,RP11-35G9.5	G1(5.5)	0
chr9	109625500	109779500	154	9q31.2	0.368	RP11-508N12.2,RP11-508N12.3,RP11-508N12.4,ZNF462	S3(3)	0
chr1	68145500	68299500	154	1p31.3	3.285	GADD45A,GNG12,GNG12-AS1,RNU7-80P	S1(5.4)	0
chr6	71122500	71276619	154	6q13	0.282	FAM135A,RNU7-48P,RP11-462G2.2	S4(2.4)	0
chr17	6771500	6925500	154	17p13.1	0.218	AC027763.2,AC040977.1,ALOX12,ALOX12P2,C17orf49,MIR497HG,RNASEK,RNASEK-C17orf49,RP11-530N7.2,RP11-530N7.3,RP11-589P10.5,RP11-589P10.7	S2(4)	0
chr8	77759500	77913500	154	8q21.11	0.246	PEX2,RP11-48D4.2,ZFHX4,hsa-mir-3149	S3(3.2)	0
chr1	45297500	45451500	154	1p34.1	0.478	AL136380.1,CCNB1IP1P1,EIF2B3,PTCH2,RNA5SP47,RP5-882O7.1	S1(5.4)	0
chr17	78234664	78388964	154	17q25.3	0.676	CTD-2047H16.2,CTD-2047H16.4,RNF213	S1(5.3)	0
chr2	62423247	62577500	154	2p15	0.158	B3GNT2,MIR5192,RN7SL51P,RP11-642D6.1,snoU13:246	S2(4)	0
chr3	128444500	128598438	154	3q21.3	2.488	FTH1P4,MARK2P6,MARK2P8,RAB7A,RN7SL698P,RP11-221E20.4,RP11-221E20.5,RP11-723O4.2,RP11-723O4.3,RP11-723O4.9,RPS15AP16	S1(4.9)	0
chr5	130599500	130753500	154	5q23-31	0.712	CDC42SE2	S1(4.7)	0
chr12	59990500	60144500	154	12q14.1	0.633	RP11-813P10.1,SLC16A7	S3(3.1)	0
chr6	64345500	64499500	154	6q12	0.987	EYS,PHF3	S3(3)	0
chr3	182511500	182665500	154	3q26.33	1.566	ATP11B,DCUN1D1,RP11-225N10.3,RP11-531F16.4	S3(3.3)	0
chr6	154677926	154831500	154	6q25.2	0.397	CNKSR3	S2(4)	0
chr3	110637500	110791500	154	3q13.13	0.046	PVRL3,PVRL3-AS1	S2(3.9)	0
chr17	75955500	76109500	154	17q25.3	0.319	AC021593.1,RNU6-625P,TMC6,TNRC6C,TNRC6C-AS1,UBE2V2P2	S1(5)	0
chr12	46777461	46931284	154	12q13.11	0.265	RP11-474P2.4,RP11-96H19.1	G1(5.6)	0
chr2	202329500	202483901	154	2q33.1	0.029	AC007163.10,AC007163.11,AC007163.8,AC007163.9,AC007282.6,ALS2CR11,MTND4P29,MTND5P31,STRADB	S1(5.3)	0
chr17	62504317	62658500	154	17q23-24	9.632	AC009994.2,CEP95,RP11-87N3.6,SMURF2	G1(5.7)	0
chr9	37465396	37619500	154	9p13.2	0.466	FBXO10,POLR1E,RP11-405L18.2,RP11-405L18.4,RP11-613M10.6,RP11-613M10.8,RP11-613M10.9,TOMM5	S1(4.9)	0
chr12	123010500	123163500	153	12q24.31	0.3	HCAR1,KNTC1,RP11-324E6.8,RSRC2	G1(5.6)	0
chr8	97504500	97657454	153	8q22.1	0.972	SDC2	S2(4.1)	0
chr2	37997500	38150329	153	2p22.2	0.159	AC010878.3,LINC00211	G1(5.6)	0
chr15	41913500	42066631	153	15q15.1	0.872	MGA,MIR626,RP11-107F6.3,RP11-107F6.4	G1(5.6)	0
chr6	73119500	73272500	153	6q13	0.028	RP11-135M8__A.1	S1(4.7)	0
chr10	75757500	75910992	153	10q22.2	6.954	ADK,AP3M1,RP11-178G16.4,RP11-178G16.5,RP11-417O11.5,VCL	G1(5.7)	0.943		1			1
chr8	33218933	33371500	153	8p12	0.289	FUT10,MAK16,RP11-359B20.1,SNORD13,TTI2	S2(3.7)	0
chr14	53466500	53619500	153	14q22.1	1.076	DDHD1,RP11-368P15.1,RP11-368P15.2,RP11-368P15.3	S1(5.1)	0
chr6	160389500	160542820	153	6q25.3	1.017	AIRN,IGF2R,RP11-288H12.3,RP11-288H12.4	S3(3.3)	0
chr1	36396318	36549675	153	1p34.3	0.759	AGO3,RP4-665N4.4,RP4-665N4.8	G1(5.6)	0
chr4	25161500	25314406	153	4p15.2	0.291	PI4K2B,RP11-660M5.1,SEPSECS	S2(3.6)	0
chr2	172598500	172751500	153	2q31.1	0.486	AC068039.4,DYNC1I2,RNU6-182P,SLC25A12	S1(5)	0
chr6	119103500	119256500	153	6q22.31	0.553	ASF1A,MCM9,RP11-210H10__A.1,RP11-351A11.1	S2(3.6)	0
chr3	179370500	179523500	153	3q26.33	0.688	PEX5L,RP11-494H4.3,USP13	S2(4.1)	0
chr8	27165500	27318500	153	8p21.2	0.125	CHRNA2,PTK2B,TRIM35	S2(3.7)	0
chr9	94156500	94309500	153	9q22.31	1.045	NFIL3,RP11-440G5.2	S1(4.9)	0
chrX	74224500	74377500	153	Xq13.3	0.273	ABCB7	S4(2)	0
chr12	92386500	92539500	153	12q21.33	0.52	BTG1,C12orf79,RP11-796E2.4	S2(4.1)	0
chr6	118623500	118776155	153	6q22.31	0.235	RP11-57K17.1,SLC35F1	S2(4)	0
chr5	86563500	86716500	153	5q14.3	4.078	CCNH,CTC-428H11.2,RASA1,RN7SL629P,RNU6-606P,RNU6-727P	S1(4.6)	0
chrX	107068500	107221500	153	Xq22.3	0.252	MID2,RP6-191P20.3,RP6-191P20.4,Y_RNA:784	S3(3.1)	0
chr8	26371790	26524500	153	8p21.2	0.843	DPYSL2,RP11-1G11.2	S2(4.2)	0
chr1	64058946	64210500	152	1p31.3	0.352	ITGB3BP,PGM1,RN7SL130P	S2(4.2)	0
chr1	167905500	168057500	152	1q24.2	2.361	DCAF6,GCSHP5,GPR161,MIR1255B2,MPC2	S1(4.8)	0
chr5	96271097	96423500	152	5q15	0.628	AC008850.3,AC008865.1,CTD-2260A17.2,LNPEP,SETP22,Y_RNA:609	S1(4.7)	0
chr15	68346500	68498500	152	15q23	1.691	CALML4,PIAS1,RP11-315D16.2	S1(4.8)	0
chrX	54522500	54674500	152	Xp11.22	0.37	FGD1,GNL3L	S2(3.5)	0
chr2	38150329	38302790	152	2p22.2	0.166	CYP1B1,RMDN2,RMDN2-AS1	S1(5.1)	0
chr1	179047500	179199500	152	1q25.2	3.968	ABL2,EIF4A1P11,RP11-345I18.1,RP11-345I18.4,SETP10,SNORA67:2,SNORA67:3,TOR3A	S1(4.9)	0
chr9	93972581	94124500	152	9q22.31	0.441	AUH	S1(5.3)	0
chr2	211401500	211553500	152	2q34	0.037	CPS1	S4(1.5)	0
chr9	103188500	103340360	152	9q31.1	0.797	MSANTD3,MSANTD3-TMEFF1,TMEFF1	S1(4.7)	0
chr8	104159500	104311000	152	8q22.3	0.067	BAALC,FZD6,MIR3151,RP11-318M2.2,RP11-318M2.3	S1(5.4)	0
chr6	76458500	76610500	152	6q14.1	0.684	MYO6,RNA5SP209,RNU6-155P,snoU13:371	S1(4.8)	0
chr15	45878500	46030500	152	15q21.1	0.318	BLOC1S6,RP11-718O11.1,RP11-96O20.4,SQRDL,Y_RNA:170	S2(3.6)	0
chr10	26726500	26878793	152	10p12.1	0.587	APBB1IP,RNA5SP307,RP11-128B16.3	S4(2.1)	0
chr5	94739500	94891500	152	5q15	0.917	ARSK,CTD-2538A21.1,FAM81B,RNU6-308P,TTC37	S1(4.7)	0
chr18	59702500	59854500	152	18q21.33	0.426	KIAA1468,PIGN	S2(4)	0
chr10	18797500	18949500	152	10p12.31	0.229	ARL5B,ARL5B-AS1,CACNB2,NSUN6,RP11-139J15.7,RP11-383B4.4,RP11-499P20.2	S3(2.5)	0
chrX	79912500	80064500	152	Xq21.1	0.507	BRWD3,RP11-325E14.5	S4(1.7)	0
chr18	74534500	74686645	152	18q23	0.759	RP11-162A12.3,RPL26P35,ZNF236	S2(3.6)	0
chr9	102710500	102862500	152	9q31.1	0.777	ERP44,INVS,STX17,UPF3AP3	S2(3.8)	0
chr12	13197217	13349649	152	12p13.1	0.06	GSG1,KIAA1467	G1(5.7)	0
chr13	20205500	20357142	152	13q12.11	1.153	AL354808.1,AL354808.2,MPHOSPH8,PSPC1,RN7SL166P,RP11-523H24.3	S2(3.5)	0
chr8	67193500	67345500	152	8q13.1	0.046	ADHFE1,RP11-346I3.4,RRS1	G1(5.5)	0
chr11	35683500	35835881	152	11p13	1.262	TRIM44	S1(5.2)	0
chr7	111847500	111999500	152	7q31.1	0.575	AC004112.4,RN7SKP187,ZNF277	S2(3.8)	0
chr1	59220500	59372500	152	1p32.1	0.039	AL136985.1,JUN,RP11-63G10.2,RP11-63G10.3,RP4-794H19.1,RP4-794H19.2	G1(5.5)	0
chr1	77998500	78149104	151	1p31.1	2.751	AK5,RN7SL370P,RNA5SP20,ZZZ3	S1(5.4)	0
chr13	41345309	41495910	151	13q14.11	0.165	CYCSP34,MIR621,SLC25A15,SUGT1P3,TPTE2P5	S1(4.5)	0
chr6	117803500	117954868	151	6q22.1	0.492	DCBLD1,GOPC	S1(4.8)	0
chr2	55496483	55647500	151	2p16.1	0.888	AC012358.8,CCDC88A,PRORSD1P,Y_RNA:435	S1(5.4)	0
chr15	68870500	69021500	151	15q23	0.06	CORO2B	S1(5)	0
chr7	138515500	138666500	151	7q34	0.435	KIAA1549,RNU6-1272P,TMEM213	S2(4.2)	0
chr7	155436500	155587500	151	7q36.3	1.771	AC009403.2,RBM33	S3(3)	0
chr3	37067500	37218500	151	3p22.2	5.363	LRRFIP2,MLH1,RNU6-1301P,UBE2D3P2,UBE2FP1,Y_RNA:518	G1(5.7)	0
chr4	75023500	75174189	151	4q13.3	0.139	AC093677.1,MTHFD2L	S1(4.6)	0
chr10	32066500	32217500	151	10p11.22	1.813	ARHGAP12,HMGB1P7	S1(5.2)	0
chr1	45806142	45956872	151	1p34.1	0.055	RP11-291L19.1,TESK2,TOE1,snoU13:207	S1(4.9)	0
chr3	52569070	52719933	151	3p21.1	1.393	GNL3,PBRM1,RNU6-856P,RNU6ATAC16P,SMIM4	S1(5.4)	0
chr2	25950500	26101500	151	2p23.3	0.926	AC010150.1,ASXL2,PTGES3P2,TPM3P7	S1(4.9)	1			1		1
chr12	65907500	66058500	151	12q14.3	0.058	PCNPP3,RP11-221N13.2,RP11-221N13.3,RP11-221N13.4,RP11-230G5.2	G1(5.7)	0
chr14	103243812	103394500	151	14q32.32	0.585	AL117209.1,AMN,RNU6-1316P,TRAF3,snoU13:77	G1(5.5)	0
chr4	106066500	106217500	151	4q24	0.752	RN7SL89P,TET2,TET2-AS1	S3(2.8)	0
chr10	826500	977500	151	10p15.3	2.105	LARP4B	S1(4.9)	0
chr2	135808500	135959500	151	2q21.3	2.306	RAB3GAP1,SNORA40:11,ZRANB3,snoU13:257	S2(3.7)	0
chr12	40617500	40768500	151	12q12	0.129	AC079630.4,AC084290.2,LRRK2	S4(1.5)	0
chr9	5856426	6007901	151	9p24.1	0.809	KIAA2026,MIR4665,MLANA,snoU13:438	S2(4.3)	0
chr10	67328500	67479500	151	10q21.3	0.045	AC022538.1,RP11-222A11.1	G2(1.4)	0
chr15	49103343	49253500	150	15q21.1	0.046	AC012379.1,EID1,RP11-138E16.1,RP11-485O10.3,SHC4	G1(5.6)	0
chr2	165328500	165478358	150	2q24.3	0.634	GRB14	S4(1.9)	0
chr6	109169618	109319684	150	6q21	0.09	ARMC2,ARMC2-AS1,RP11-249L21.2,RP11-249L21.4,SESN1	S1(4.8)	0
chr15	99791500	99941500	150	15q26.3	0.321	AC022819.1,AC022819.2,HNRNPA1P62,HSP90B2P,LRRC28,RP11-20G13.2,RP11-20G13.3,RP11-616M17.1	S2(4.4)	0
chr3	169750500	169900500	150	3q26.2	1.566	GPR160,PHC3,RNU4-38P,RNU6-315P,RP11-379K17.12,RP11-379K17.9	S1(4.5)	0
chr1	19386500	19536770	150	1p36.13	2.379	AL137127.1,RP5-1126H10.2,UBR4	S1(5.3)	0
chr18	44482500	44632316	150	18q21.1	0.056	KATNAL2,PIAS2,RP11-49K24.4,TCEB3B,TCEB3C,TCEB3CL,TCEB3CL2	S4(2.4)	0
chr2	113520500	113670547	150	2q13	0.098	AC079753.1,AC079753.4,CKAP2L,IL1A,IL1B	S1(5.2)	0
chr6	114316500	114466500	150	6q21	0.085	HDAC2,HS3ST5,NUDT19P3,RP3-399L15.3,RPSAP43	S2(3.8)	0
chr15	101642500	101792137	150	15q26.3	1.169	CHSY1,RP11-424I19.1,RP11-424I19.2	S1(5.4)	0
chr6	146135889	146285500	150	6q24.3	0.548	RP11-545I5.3,SHPRH	S3(3.2)	0
chr12	46768500	46918500	150	12q13.11	0.161	RP11-474P2.4,RP11-96H19.1	G1(5.6)	0
chr7	135194500	135344786	150	7q33	0.462	CNOT4,NUP205,RP11-751K21.1	S1(4.7)	0
chr1	65282500	65432187	150	1p31.3	1.598	JAK1,RAVER2,RP11-182I10.1,RP11-182I10.2	S3(3.4)	0
chr2	68338080	68488362	150	2p14	1.766	AC017083.1,AC017083.2,PNO1,PPP3R1,RP11-474G23.1,RP11-474G23.2,RP11-474G23.3,WDR92	S1(4.8)	0
chr10	104004500	104153866	149	10q24.32	1.594	AL160011.1,GBF1	G1(5.6)	0
chr6	130686500	130835500	149	6q23.1	2.717	AL137251.1,SAMD3,TMEM200A	S1(4.9)	0
chr2	86701500	86850500	149	2p11.2	0.691	AC015971.1,AC015971.2,CHMP3,KDM3A,RNF103,RNF103-CHMP3,RNU6-640P	S3(3)	0
chr10	98592500	98741040	149	10q24.1	2.599	AL162502.1,HMGN2P35,LCOR	S2(4.1)	0
chr7	30174425	30323922	149	7p14.3	0.197	AC007036.4,AC007036.5,AC007036.6,C7orf41,RPS27P16	S2(4.1)	0
chr6	130341500	130490500	149	6q23.1	0.253	L3MBTL3,RP11-73O6.3,SAMD3	S2(4.3)	0
chr10	125503500	125652500	149	10q26.13	0.259	CPXM2,RP11-391M7.3	S4(2.1)	0
chr6	7108500	7257500	149	6p24.3	2.001	RP11-405O10.2,RREB1,Y_RNA:649	S2(3.7)	0
chr14	104028232	104177606	149	14q32.33	2.675	AL139300.1,APOPT1,BAG5,KLC1,RNU4-68P,RP11-73M18.10,RP11-73M18.2,RP11-73M18.6,RP11-73M18.7,RP11-73M18.8,RP11-894P9.1,XRCC3	G1(5.6)	0
chr5	41721500	41870500	149	5p13.1	0.567	OXCT1,OXCT1-AS1	S3(2.5)	0
chr1	197169500	197318500	149	1q31.3	0.088	CRB1,RP11-332L8.1,ZBTB41	S3(3)	0
chr1	52870131	53019500	149	1p32.3	0.826	PRPF38A,ZCCHC11,snoU13:187	S1(5)	0
chr6	158402887	158551500	149	6q25.3	2.225	SERAC1,SYNJ2,SYNJ2-IT1	G1(5.6)	0
chr13	96329500	96478500	149	13q32.1	1.289	DNAJC3,HMGN1P24,MTCYBP3,MTND5P2,MTND6P18,UGGT2,snR65:1	S2(4.1)	0
chr3	72749500	72898500	149	3p13	0.414	RP11-624D20.1,SHQ1	S2(4)	0
chr2	214148500	214297500	149	2q34	0.246	AC079610.2,SPAG16	S3(3.1)	0
chr7	112430647	112579971	149	7q31.1	1.128	C7orf60	S3(2.9)	0
chr12	63036500	63185500	149	12q14.1-2	0.025	GAPDHP44,PPM1H,RPL32P26,snoU13:48	G1(5.5)	0
chr13	113112500	113261500	149	13q34	0.556	TUBGCP3	S3(3.4)	0
chr4	39699500	39847500	148	4p14	1.398	PDS5A,RN7SL558P,RP11-539G18.1,UBE2K,Y_RNA:559,ZBTB12P1	G1(5.5)	0
chr12	3714500	3862500	148	12p13.32	0.268	AC005831.1,EFCAB4B,RNU6-174P	S3(3)	0
chr12	121193500	121341500	148	12q24.31	0.882	ARF1P2,RP11-173P15.7,SPPL3	S2(4.4)	0
chr11	68080500	68228185	148	11q13.2	0.034	LRP5	S1(5)	0
chr4	153700500	153848597	148	4q31.3	1.135	AC099339.1,ARFIP1,RP11-529H22.1,TIGD4	S2(3.7)	0
chr18	2865500	3013500	148	18p11.31-32	0.994	EMILIN2,LPIN2,RP11-737O24.1,RP11-737O24.2,RP11-737O24.3,RP11-737O24.4,RP11-737O24.5	S1(4.7)	0
chr17	37410550	37558776	148	17q12	0.518	AC005288.1,CTB-131K11.1,FBXL20	S1(5.2)	0
chr8	17779500	17927500	148	8p22	1.051	ASAH1,PCM1	S2(4)	0
chr8	81876500	82024500	148	8q21.13	0.137	PAG1,RP11-1149M10.1,RP11-172E10.1	S2(3.7)	0
chr5	79404500	79552500	148	5q14.1	0.417	CTC-458I2.2,SERINC5,snoU13:355	S3(3.3)	0
chr13	99081500	99229500	148	13q32.2	1.846	FARP1,FARP1-AS1,RP11-295B17.6,STK24,STK24-AS1	S1(4.7)	0
chr17	60556500	60704761	148	17q23.2	1.181	RP11-464D20.2,RP11-464D20.6,TLK2	S1(5.4)	0
chr11	35155500	35303359	148	11p13	13.592	CD44,RP1-68D18.2,RP1-68D18.4,RP4-607I7.1,SLC1A2	G1(5.7)	0
chr12	70489500	70637500	148	12q15	0.105	CNOT2,RP11-320P7.1,RP11-320P7.2,RP11-611E13.2	S3(2.6)	0
chr22	44060500	44208500	148	22q13.2-31	0.051	EFCAB6,HMGN2P9,RP3-388M5.8,RP3-388M5.9	S2(3.5)	0
chr7	129251500	129399500	148	7q32.2	0.875	NRF1,RNA5SP244	S1(5.1)	0
chr6	53660500	53808500	148	6p12.1	0.325	LRRC1,MLIP,RP11-411K7.1,RP3-523E19.2	S2(4)	0
chr1	85526500	85674500	148	1p22.3	0.08	MIR4423,SYDE2,WDR63	S1(5.2)	0
chr3	52931612	53079500	148	3p21.1	0.311	RP11-894J14.5,SFMBT1	S1(5.1)	0
chr13	32965500	33113500	148	13q13.1	1.242	ATP8A2P2,BRCA2,N4BP2L1,N4BP2L2,RP11-298P3.4,SNORA16:1	S2(4.4)	0
chr4	123400500	123548500	148	4q27	0.035	IL21,IL21-AS1	S1(4.8)	0
chr1	243271500	243419500	148	1q43	2.013	AC092782.1,CEP170,RP11-261C10.4,RP11-261C10.5,SDCCAG8	S3(3.3)	0
chr15	93425500	93573500	148	15q26.1	6.47	AC013394.2,CHD2,MIR3175	S1(4.7)	0
chr9	91003500	91150015	147	9q22.1	1.455	HNRNPA1P14,RP11-317B17.3,SPIN1	S1(4.8)	0
chr11	66886500	67033880	147	11q13.2	1.256	AP001885.1,KDM2A,snoU13:29	G1(5.6)	0
chr12	96037500	96184500	147	12q22	1.474	NTN4,PGAM1P5	S1(5.3)	0
chr8	67971500	68118500	147	8q13.1-2	0.626	ARFGEF1,COPS5,CSPP1,RNA5SP268,RP11-453N18.1	S3(3.4)	0
chr8	1772141	1919562	147	8p23.3	0.619	ARHGEF10	S2(3.5)	0
chr2	101620500	101767500	147	2q11.2	0.314	RN7SL548P,RP11-426K3.1,RPL31,TBC1D8	S1(4.9)	0
chr9	21802500	21949500	147	9p21.3	1.299	AL359922.1,MTAP,RP11-145E5.5,RP11-149I2.5,RP11-70L8.4,TUBB8P1	S1(5.2)	1	1	1	2		4
chr22	36642500	36789500	147	22q12.3	5.461	APOL1,MYH9,RN7SL349P,RP4-633O19__A.1	G1(5.6)	0
chr8	41509500	41656500	147	8p11.21	0.038	ANK1,MIR486,RP11-930P14.1	S1(4.8)	0
chrX	109415500	109562500	147	Xq23	0.998	AMMECR1,AMMECR1-IT1,SNORD96B,TMEM164	S1(5.1)	0
chr9	100000500	100147500	147	9q22.33	0.11	CCDC180,MIR1302-8,RP11-23J9.4,RP11-23J9.5,RP11-23J9.6,RP11-23J9.7,RP11-498P14.5	S3(3.1)	0
chr11	128564500	128711500	147	11q24.3	0.548	FLI1,FLI1-AS1,KCNJ1	S1(5)	0
chr4	68565500	68712500	147	4q13.2	0.104	GNRHR,RP11-453E17.3,RP11-453E17.4,SNORA62:6,ST3GAL1P1,TMPRSS11CP,TMPRSS11D,UBA6,UBA6-AS1	S3(2.9)	0
chr7	1030500	1177896	147	7p22.3	0.15	AC073957.15,AC091729.7,AC091729.8,C7orf50,GPER1,GPR146,MIR339,RP11-449P15.1	S1(4.8)	0
chr7	156931500	157078500	147	7q36.3	1.518	RP4-814D15.1,RP4-814D15.2,RP5-1142J19.1,RP5-1142J19.2,UBE3C	S1(5.2)	0
chr4	141530500	141677500	147	4q31.21	0.603	RP11-102N12.2,TBC1D9,TNRC18P1,Y_RNA:545	S2(3.5)	0
chr17	3899500	4046314	147	17p13.2	1.169	RNA5SP434,ZZEF1,snoU13:129	S1(5.1)	0
chr19	16435325	16582500	147	19p13.11	0.483	CTD-2013N17.1,CTD-2013N17.4,EPS15L1,KLF2,RN7SL844P	G1(5.5)	0
chr12	102513500	102660500	147	12q23.2	0.249	NUP37,PARPBP,PMCH,RN7SL793P,RP11-18O15.1	S3(3.4)	0
chr14	67680500	67826982	146	14q23.3	0.636	ATP6V1D,EIF2S1,FAM71D,MPP5,Y_RNA:138	S1(5.2)	0.599			1	1	2
chr6	87861500	88007500	146	6q14-15	1.835	GJB7,RP11-393I2.2,RP11-393I2.4,ZNF292	S2(3.8)	0
chr6	42531500	42677500	146	6p21.1	1.414	PRPH2,RNU6-890P,UBR2	G1(5.5)	0
chr1	157963500	158109500	146	1q23.1	1	KIRREL,KIRREL-IT1,RP11-404O13.1	S2(4.2)	0
chr11	85634725	85780500	146	11q14.2	8.714	PICALM,SLC25A1P1	S1(5.4)	0
chr2	20878692	21024500	146	2p24.1	0.424	AC012065.7,C2orf43	S1(4.9)	0
chr3	32434500	32580500	146	3p22.3	0.124	AC104306.1,AC104306.2,CMTM6,CMTM7,DYNC1LI1	S2(4)	0
chr2	225304500	225450500	146	2q36.2	2.098	AC073052.1,CUL3	S2(3.7)	0
chr10	90971500	91117500	146	10q23.31	0.298	AL353751.1,IFIT2,IFIT3,LIPA,RP11-149I23.3	G1(5.5)	0
chr12	21949500	22095500	146	12p12.1	0.396	ABCC9,RP11-729I10.2	S4(2.4)	0
chr15	41262500	41408500	146	15q15.1	1.773	CYCSP2,INO80,RP11-540O11.4,RP11-540O11.6,RP11-540O11.7	G1(5.6)	0
chr11	78140882	78286500	146	11q14.1	0.335	NARS2,RP11-452H21.1,RP11-843A23.1	S1(4.7)	0
chr7	55494500	55640500	146	7p11.2	1.396	LANCL2,VOPP1	S2(4.3)	0
chr19	48102500	48248778	146	19q13.33	0.868	CTD-2571L23.8,CTD-3001H11.1,EHD2,GLTSCR1	S1(5.1)	0
[truncated: 17,805 more rows]

## Sheet: HF1
									number_of_CNVs
chrom	start	end	size(Kb)	band	RPKM	gene(s)	rep_timing	CNV_coverage	APH	PCR	all
chr1	57454500	59013500	1559	1p32.1-2	0.153	AL137855.1,DAB1,HNRNPA1P6,OMA1,RP11-243M12.1,RP11-393I23.2,RP11-393I23.3,RP11-393I23.4,RP11-414C16.1,RP4-737A23.2,RP5-1103B4.3,RP6-102O10.1	S3(3.1)	0.113		2	2
chr7	77620500	79084500	1464	7q21.11	0.922	AC004945.1,AC006355.3,AC007237.2,MAGI2,MAGI2-AS1,MAGI2-AS2,MAGI2-AS3,MAGI2-IT1,RNU6-337P,RNU6-530P,RP5-1185I7.1,RPL13AP17	S2(4.2)	0.235	2		2
chr3	174152500	175527551	1375	3q26.31	0.462	MIR4789,NAALADL2,NAALADL2-AS1,NAALADL2-AS2,NAALADL2-AS3,RN7SKP40,RNU4-91P,RNU6-1233P,RNU6-1317P,RP11-432A8.2,RP11-744O11.2,UBE2V1P2,snoU13:291	S3(3.1)	0.183	2		2
chr10	52749500	54074055	1325	10q11-21	0.927	AC022537.1,AC068062.1,CSTF2T,MIR605,PRKG1,PRKG1-AS1,RP11-40C11.2,RP11-539E19.2,RP11-96B5.3,RSU1P3	S3(3.4)	0.264	8		8
chr16	82659500	83831265	1172	16q23.3	0.059	AC009142.1,AC099506.1,CDH13,CTD-3253I12.1,MIR3182,RN7SL134P,RP11-22H5.2,RP11-298D21.1,RP11-298D21.2,RP11-298D21.3,RP11-483P21.2,RP11-543N12.1	S3(3)	0.188	2		2
chr2	205409500	206518500	1109	2q33.3	0.763	AC008171.1,PARD3B	S3(3)	0.04	1		1
chr2	56410500	57495500	1085	2p16.1	1.703	AC007743.1,AC008173.1,CCDC85A,RNA5SP93,RP11-443I9.1,RP11-482H16.1,snoU13:270	S3(2.5)	0
chr9	119162885	120177500	1015	9q33.1	0.133	AL354981.1,ASTN2,PAPPA,RN7SKP125,RN7SKP128,RP11-264C15.2,RP11-67K19.3,RPL10P3,SNORA70C,TRIM32	S3(2.9)	0
chr7	40174574	41118500	944	7p14.1	0.141	AC004988.1,AC005029.1,AC005160.3,AC006023.8,C7orf10	S2(4)	0
chrX	95938500	96874500	936	Xq21.33	0.47	DIAPH2,DIAPH2-AS1,RN7SL74P,RP11-392M9.2,RPA4,Y_RNA:804	S4(2.3)	0.364	3		3
chr7	110275500	111203500	928	7q31.1	0.295	AC003989.3,AC003989.4,AC005161.1,IMMP2L,IMMP2L-IT1,LRRN3,snoU13:399	S4(2.4)	0.055	2		2
chr1	71825500	72749500	924	1p31.1	0.271	GDI2P2,NEGR1,NEGR1-IT1,RP11-115M14.1,RP11-175G14.2,RP11-82L20.1,ZRANB2-AS2	S4(2.1)	0.405	4		4
chr7	89970500	90893782	923	7q21.13	0.655	AC002456.2,AC006153.3,CDK14,CLDN12,CTB-13L3.1,GTPBP10,PTP4A1P3,TVP23CP1,snoU13:412	S2(4)	0
chr3	173113500	174023500	910	3q26.31	0.646	NLGN1,NLGN1-AS1,RN7SKP234,RP11-393N4.1,RP11-521A24.1	S3(3)	0.367	1		1
chr14	68282500	69163500	881	14q24.1	0.154	CTD-2325P2.2,CTD-2325P2.3,CTD-2325P2.4,CTD-2566J3.1,PPIAP6,RAD51B,RN7SL108P,RN7SL706P,RP11-204K16.1,ZFYVE26	S1(5.1)	0
chr3	3637500	4510500	873	3p26.1-2	0.14	AC024158.1,AC026188.1,LRRN1,MRPS10P2,PNPT1P1,SETMAR,SUMF1	S4(1.5)	0
chr8	100024500	100896500	872	8q22.2	0.942	AC018442.1,AP004289.1,AP004289.2,AP004290.1,COX6C,CTD-2340D6.1,CTD-2340D6.2,MIR599,MIR875,RN7SL350P,RP11-402L5.1,RP11-402L5.2,RP11-410L14.2,VPS13B,Y_RNA:705	S2(3.9)	0
chr1	97516500	98386605	870	1p21.3	1.461	DPYD,DPYD-AS1,DPYD-AS2,DPYD-IT1,RP11-272L13.2,RP11-272L13.4,RPL26P9,SEC63P1	S2(4)	0.144	2		2
chr4	142911500	143768500	857	4q31.21	2.17	INPP4B,LSM3P4,RP11-223C24.1,RP11-223C24.2,RPL5P13	S2(4.3)	0
chr7	132936500	133785500	849	7q33	0.741	AC007790.4,AC083875.1,AC083875.2,COX5BP3,EXOC4	S3(2.5)	0
chr18	7566500	8412126	846	18p11.23	0.939	AP000897.1,AP001094.1,AP005118.1,AP005227.1,PTPRM,RP11-376P6.3,RP11-678G15.1,RP11-678G15.2,RP11-789C17.1,RP11-789C17.3,RP11-789C17.5,U3:23	S3(2.6)	0.039	2		2
chr1	174127500	174968299	841	1q25.1	0.438	AL022400.1,BANF1P4,GPR52,NDUFAF4P4,RABGAP1L,RABGAP1L-IT1,RNU6-307P,RP1-102G20.2,RP1-102G20.4,RP1-102G20.5,RP11-160H22.5,RP4-809F4.1,snoU13:196	S3(2.6)	0
chr20	8111500	8952500	841	20p12.3	0.514	AL031655.1,AL031655.2,PLCB1,PLCB1-IT1,RNU105B,RP5-859I17.2	S2(4.2)	0
chr1	245839780	246671500	832	1q44	0.635	CHCHD4P5,KIF26B,RNU6-1283P,RP11-36N20.1,RP11-83A16.1,SMYD3,SMYD3-IT1,Y_RNA:348	S2(3.9)	0.335	3		3
chr3	114035026	114866500	831	3q13.31	1.166	MIR4796,MIR568,RP11-197K3.1,YBX1P3,ZBTB20,ZBTB20-AS1,ZBTB20-AS2,ZBTB20-AS3,ZBTB20-AS4	S2(4.4)	0
chr5	95296500	96120480	824	5q15	0.517	AC008592.7,AC020900.1,AC020900.2,CAST,CTC-506B8.1,CTD-2337A12.1,ELL2,ERAP1,FABP5P5,MIR583,PCSK1,RNU6-524P,RP11-254I22.1,RP11-254I22.2,RP11-254I22.3	S1(5.3)	0
chr3	187870500	188694542	824	3q27-28	1.971	AC022498.1,AC063932.1,LPP,LPP-AS1,LPP-AS2,MIR28,TPRG1,TPRG1-AS1	S1(4.8)	0
chr5	58262500	59065500	803	5q11-12	0.038	MIR582,NDUFB4P2,PDE4D,RP11-266N13.2	S3(3.2)	0
chr10	78601500	79398353	797	10q22.3	2.811	KCNMA1,RNA5SP321,RP11-180I22.2,RP11-328K22.1,RP11-417C21.2,RP11-443A13.5,RP11-619F23.2	S1(4.8)	0
chr11	78357500	79152500	795	11q14.1	0.086	AP002958.1,CTD-2337I7.1,MIR5579,MIR708,RP11-673F18.1,RP11-802F5.1,TENM4	S3(3.3)	0
chr1	6844500	7637500	793	1p36.23-31	0.249	CAMTA1,CAMTA1-IT1,RNU1-8P,RP11-312B8.1,RP11-312B8.2,RP11-334N17.1,RP3-453P22.2,RP4-549F15.1	S2(3.9)	0
chr4	81186500	81967500	781	4q21.21	0.901	BMP3,C4orf22,FGF5,RP11-395C17.1	S2(4.1)	0
chr4	151159500	151937500	778	4q31.3	0.336	AC110813.1,DCLK2,LRBA,MAB21L2,RNA5SP168,RP11-1336O20.2,RP11-174F8.1,ZBTB8OSP1	S2(4)	0
chr6	147828500	148593439	765	6q24.3	0.127	RP11-242F11.2,RP11-307P5.1,RP11-307P5.2,RP11-631F7.1,RP11-631F7.2,SAMD5	S2(3.9)	0
chr3	61545500	62304647	759	3p14.2	0.71	PTPRG,PTPRG-AS1,RNU2-10P,RP11-154D3.1,RPL10AP6,Y_RNA:524	S3(2.7)	0
chr3	65267500	66025500	758	3p14.1	1.134	AC104438.1,AC106827.1,AC106827.2,ILF2P1,MAGI1,MAGI1-AS1,MAGI1-IT1,RP11-88H12.2,RPL17P17,Y_RNA:525	S2(3.9)	0
chr8	104511500	105269500	758	8q22.3	0.23	AP001572.1,RIMS2,RP11-1C8.4,RP11-5A11.1,RP11-5A11.2,RP11-771F20.1,snoU13:415	S3(3)	0
chr3	41253500	42004500	751	3p22.1	0.161	AC099537.1,ATP6V0E1P2,CTNNB1,RN7SKP58,RPL36P20,SCARNA21:4,U8:21,ULK4,Y_RNA:521	S3(3.2)	0
chr15	60771359	61521500	750	15q22.2	0.184	CTD-2501E16.1,CTD-2501E16.2,RNA5SP397,RORA,RP11-219B17.1,RP11-219B17.2,RP11-39M21.1,RP11-39M21.2,RP11-554D20.1	S2(4)	0.211	3		3
chr8	140727500	141475500	748	8q24.3	0.321	C8orf17,RP11-284H18.1,TRAPPC9	S2(3.5)	0
chr3	29321500	30067500	746	3p24.1	1.129	AC092796.1,AC098650.1,AC099048.1,RBMS3,RBMS3-AS1,RBMS3-AS2,RBMS3-AS3,RPS12P5	S2(3.7)	0
chr13	35515500	36251500	736	13q13.3	0.435	AL390071.1,MAB21L1,NBEA,PHBP13,SCAND3P1	S2(3.8)	0
chr9	27944495	28670283	726	9p21.1-2	0.143	LINGO2,RP11-20P5.2,RP11-32I2.1	G2(1.3)	0
chr22	33593500	34317500	724	22q12.3	0.509	LARGE,LARGE-AS1,LARGE-IT1,MIR4764,SC22CB-1D7.1,SNORA76:3	S4(2.2)	0.098	1		1
chr6	20533500	21257500	724	6p22.3	0.582	CDKAL1,RNU6-150P,RP3-348I23.2,RP3-348I23.3	S3(2.9)	0
chr2	63346677	64069500	723	2p15	0.194	AC016734.1,AC016734.2,AC074367.1,AC096664.1,AC096664.2,AC096664.3,HNRNPA1P66,MDH1,RPS4XP5,UGP2,WDPCP	S2(4.3)	0
chr17	58754813	59477256	722	17q23.2	0.318	AC005884.1,AC079005.1,AC111155.1,BCAS3,HMGN1P28,KRT18P61,RN7SL448P,RN7SL606P,RP11-136H19.1,RP11-264B14.1,RP11-264B14.2,RP11-332H18.3,RP11-332H18.4,RP11-332H18.5,Y_RNA:248,snoU13:142	S1(4.8)	0
chr22	28357500	29075853	718	22q12.1	0.617	RN7SL162P,RN7SL757P,SNORD42:1,TTC28,TTC28-AS1,Y_RNA:400	S1(4.6)	0
chr10	34394500	35104500	710	10p11.21-22	0.5	PARD3,RP11-8L18.2,RP11-8L18.3,TCEB2P4,Y_RNA:25	S2(4)	0
chr14	32672500	33377500	705	14q12-13	0.625	AKAP6,RN7SL660P,RP11-134E15.1,RP11-134E15.2,RP11-320M16.1,RP11-320M16.2	S2(4)	0
chr9	81200500	81900500	700	9q21.31	0.223	KRT18P24,MTND2P8,RP11-165H23.1,RP11-216F5.1	S1(4.9)	0
chr18	36682500	37381500	699	18q12.2-3	0.288	LINC00669,MIR5583-1,RNU6-1242P,RPL7AP66	S4(1.8)	0
chr3	123751500	124449212	698	3q21.1-2	0.496	AC080008.1,AC117401.1,KALRN,MIR5002,RNU6-143P,RP11-521J5.1,RP11-71H17.7	S1(4.8)	0
chr15	71389290	72084976	696	15q23	0.504	AC108861.1,CT62,RP11-592N21.1,RP11-592N21.2,RP11-673C5.1,RP11-673C5.2,THSD4	S1(5.1)	0.187	1		1
chr20	59828500	60517500	689	20q13.33	0.053	CDH4,RP11-429E11.2,RP11-429E11.3	S3(2.6)	0
chr14	66973500	67656500	683	14q23.3	0.331	CTD-2560C21.1,FAM71D,GPHN,RP11-72M17.1,RP11-862P13.1	S2(3.8)	0
chr6	101846663	102526746	680	6q16.3	1.98	GRIK2,RP11-93K7.1	S3(2.8)	0
chr2	236402500	237076089	674	2q37.2	0.573	AC012305.1,AC064874.1,AGAP1,AGAP1-IT1,GBX2,RN7SL204P,RNU7-127P,TMSB10P1,Y_RNA:457	S4(2.4)	0
chr3	134316642	134990500	674	3q22.2	0.029	EPHB1,KY,RNA5SP141,RNU6-1174P	S3(3)	0
chr2	72381500	73054500	673	2p13.2	0.841	AC006461.2,EXOC6B,RNU2-39P,SNORD78:3	S2(3.8)	0
chr4	183064500	183732500	668	4q34-35	0.485	AC108142.1,MIR1305,RN7SKP67,RNU2-34P,RP11-18D7.2,RP11-18D7.3,RP11-402C9.1,TENM3	S3(2.8)	0
chr13	50655500	51315500	660	13q14.2-3	0.052	AL138696.1,DLEU1,DLEU2,DLEU7,RP11-175B12.2,RPL18P10,RPL34P26,ST13P4	S2(4)	0
chr12	2161500	2820500	659	12p13.33	2.452	AC007618.3,CACNA1C,CACNA1C-AS1,CACNA1C-AS2,CACNA1C-AS3,CACNA1C-AS4,CACNA1C-IT3	S1(4.9)	0
chr6	1590500	2247500	657	6p25.3	0.257	FOXC1,GMDS,GMDS-AS1	S3(3.3)	0
chr1	33978343	34631500	653	1p34-35	0.206	CSMD2,HMGB4,HSPD1P14,RNA5SP42,RP5-1007G16.1	S2(3.7)	0
chr6	129203500	129852500	649	6q22.33	1.541	BMPR1APS1,LAMA2,MESTP1,RNU6-861P,RP1-69D17.3,RP1-69D17.4	S1(4.5)	0
chr3	70987500	71632500	645	3p13	1.343	FOXP1,FOXP1-AS1,FOXP1-IT1,MIR1284	S2(4.2)	0
chr4	86395500	87039064	644	4q21.23-3	0.617	AC098870.1,ARHGAP24,MAPK10,MIR4451,RP13-514E23.1,RP13-514E23.2	S2(4.3)	0.255	1		1
chr5	168091500	168729500	638	5q34-35	0.111	CTB-174D11.1,CTB-174D11.2,CTC-558O2.1,CTC-558O2.2,MIR218-2,MIR585,SLIT3,Y_RNA:578	S3(3.1)	0
chr16	12069500	12705500	636	16p13.12-13	0.847	ACA64:2,CTD-3037G24.3,CTD-3037G24.4,RP11-165M1.2,RP11-165M1.3,RP11-166B2.1,RP11-166B2.7,RP11-276H1.2,RP11-276H1.3,RP11-552C15.1,RPS23P6,SNX29	S2(4.3)	0
chr12	79257500	79885500	628	12q21.2	0.731	AC027288.1,AC027288.2,AC078917.1,MIR1252,RP1-78O14.1,RP11-390N6.1,SYT1	S2(3.6)	0
chr18	65545500	66162500	617	18q22.1	0.135	AKR1B10P2,RP11-128D14.1,RP11-421N8.1,RP11-421N8.2,RP11-526H11.1,RP11-638L3.1,RP11-659F24.1	S2(3.9)	0
chr7	33149500	33765592	616	7p14.3	0.244	AC006195.2,AC007312.3,AC074338.5,BBS9,RNA5SP229,snoU13:407	S2(4.1)	0
chr2	220970376	221585500	615	2q35-36	0.036	AC019051.1,AC067956.1,AC114765.1,AC114765.2,AC114765.3	S3(3.3)	0
chr1	240906911	241521500	615	1q43	0.173	HNRNPA1P42,MIR3123,PRKRIRP8,RFKP1,RGS7,RP11-306K13.1,RP11-435F13.2,RP11-80B9.1	S2(3.5)	0
chr3	77087500	77701500	614	3p12.3	0.093	RNU6-386P,ROBO2,VDAC1P7	S4(2.4)	0
chr17	63579500	64189500	610	17q24.1	0.537	CEP112,CTD-2535L24.2,GS1-531I17.2,GS1-531I17.3	S2(4.3)	0
chr8	89821137	90427300	606	8q21.3	0.031	KRT8P4,RP11-255L13.1	S3(3.4)	0
chr2	133429152	134035500	606	2q21.2	0.069	AC010890.1,AC011755.1,AC016909.1,AC016909.2,NCKAP5	S3(3.3)	0
chr10	75910959	76515500	605	10q22.2	1.433	ADK,MRPL35P3,POLR3DP1,RAB5CP1,RP11-312P12.3,RP11-383B24.3,RP11-46O21.2,RPSAP6,TIMM9P1,Y_RNA:16	S1(4.7)	0
chr3	17181500	17785500	604	3p24.3	0.691	AC090960.1,AC104451.2,AC140076.1,TBC1D5,U7:2	S3(3.2)	0
chr14	79744500	80346500	602	14q31.1	0.184	NRXN3,RP11-242P2.1,RP11-242P2.2	S4(2.4)	0
chr15	39106500	39705500	599	15q14	0.319	C15orf54,RP11-265N7.1,RP11-265N7.2,RP11-462P6.1,RP11-624L4.1,RP11-62C7.2	S1(5.2)	0
chr6	144605500	145202500	597	6q24.2	1.684	RP1-91J24.3,RP11-106E7.1,RP11-277I20.2,RP11-277I20.3,UTRN	S2(4.3)	0
chr4	53652500	54245500	593	4q12	0.642	FIP1L1,RASL11B,RNU6-310P,RP11-752D24.2,RP11-752D24.3,SCFD2,Y_RNA:535	S2(4.1)	0
chr8	18352500	18943500	591	8p22	0.797	AC090420.1,PSD3,RP11-1080G15.1,RP11-161I2.1,RP11-420B22.1,RP11-420B22.2,RPL35P6,SNORA62:7	S2(4.1)	0
chrX	12155500	12746500	591	Xp22.2	0.353	7SK:7,AC002981.1,FRMPD4,FRMPD4-AS1,RPL17P49,Y_RNA:770	S2(3.6)	0
chr11	126286500	126875500	589	11q24.2	1.449	AP002833.1,KIRREL3,KIRREL3-AS1,KIRREL3-AS2,KIRREL3-AS3,MIR3167,RP11-115C10.1,RP11-688I9.2,RP11-688I9.4,ST3GAL4	S1(4.7)	0
chr1	66257500	66845500	588	1p31.3	0.916	PDE4B,RNU4-88P,RP11-397C12.1	S1(4.7)	0
chr6	73330500	73917500	587	6q13	0.589	KCNQ5,KCNQ5-AS1,KCNQ5-IT1,KNOP1P4,MIR4282,PGAM1P10,RP11-257K9.3	S1(4.9)	0
chr8	118541500	119124500	583	8q24.11	7.013	EXT1,MED30	S1(5.3)	0
chr6	44764500	45346500	582	6p21.1	0.222	MIR586,NUDT19P4,RP11-491H9.3,RUNX2,SUPT3H	S2(3.9)	0
chr2	27994583	28576500	582	2p23.2	0.502	AC093690.1,AC110084.1,BRE,MIR4263,MRPL33,RBKS,RP11-674I16.1,RP11-674I16.2,RP11-731I19.1	S1(5.2)	0
chr4	86935027	87516500	581	4q21.3	0.073	MAPK10,MIR4452,PTPN13,RN7SKP96,RP11-778J15.1	S2(4.4)	0.903	2		2
chr1	171809500	172389873	580	1q24.3	0.073	C1orf105,DNM3,DNM3-IT1,DNM3OS,MIR199A2,MIR214,PIGC,RNU6-157P,SNORD112:23	S1(4.8)	0
chr2	100142500	100722500	580	2q11.2	1.442	AC092667.2,AFF3	S2(3.9)	0
chr6	128268500	128846500	578	6q22.33	3.899	PTPRK,RP1-86D1.2,RP1-86D1.3,RP1-86D1.4,RP1-86D1.5,RP11-103C16.2	S2(4.1)	0
chr11	19616500	20190500	574	11p15.1	2.637	DBX1,MIR4694,NAV2,NAV2-AS1,NAV2-AS2,NAV2-AS3,RP11-359E10.1	S1(4.9)	0
chr7	121956500	122527500	571	7q31.32	0.154	CADPS2,RNF133,RNF148,RP11-395G17.1,RP5-1101C3.1,RP5-1166A24.1,RPS26P31	G2(1.4)	0
chr2	18740500	19311500	571	2p24.1-2	0.111	AC092594.1,AC106053.1,NT5C1B,NT5C1B-RDH14,RDH14,RNU6-1215P	S1(4.5)	0
chr1	245317500	245888500	571	1q44	0.63	AL359983.1,DNAJC19P8,KIF26B,RP11-522M21.2,RP11-522M21.3,RP11-62I21.1	S2(3.8)	0.256	2		2
chr12	44229769	44799500	570	12q12	0.39	RP11-46I1.1,RP11-46I1.2,RP11-624G19.1,TMEM117	S3(2.7)	0.297	1		1
chr1	231663500	232232500	569	1q42.2	0.496	DISC1,DISC1-IT1,LINC00582,RNU5A-5P,RP11-295G20.2,TSNAX,TSNAX-DISC1	S3(3.4)	0
chr16	78383500	78951500	568	16q23.1	0.031	LSM3P5,RP11-264L1.3,RP11-264L1.4,RP11-319G9.3,RPS3P7,WWOX	S4(1.7)	0.149	1		1
chr21	17441500	18009500	568	21q21.1	0.235	AP000473.5,AP000962.2,AP001172.2,AP001172.3,LINC00478,MIR125B2,MIR99A,MIRLET7C,RPS26P5,SNORD74:5,VDAC2P1	S3(3)	0
chr15	76634404	77198500	564	15q24.3	0.311	ISL2,MIR3713,RN7SKP217,RP11-331H13.1,RP11-685G9.4,SCAPER	S2(4.1)	0
chr6	5260500	5823500	563	6p25.1	0.682	FARS2,HNRNPA1P37,LYRM4,RP1-182O16.1,RP1-182O16.2,RP1-232P20.1,RP1-256G22.2,RP3-520B18.1	S3(2.6)	0
chr9	126134500	126693500	559	9q33.3	1.281	AL161790.1,CRB2,DENND1A,MIR601,PIGFP2,RP11-230L22.4,RP11-417B4.2,RP11-417B4.3	S2(4.1)	0
chr8	99400475	99959500	559	8q22.2	0.694	KB-1205A7.1,KB-1205A7.2,KB-1517D11.2,KB-1517D11.4,KCNS2,MRP63P7,OSR2,RN7SKP85,RNU6-748P,RP11-44N12.4,RP11-44N12.5,RPL19P14,STK3	S1(5.2)	0
chr8	97656500	98215500	559	8q22.1	0.524	CPQ,KB-1958F4.1,KB-1958F4.2	S2(4.2)	0
chr1	50886500	51444500	558	1p32.3	0.839	CDKN2C,DMRTA2,FAF1,MRPS6P2,PHBP12,RNU6-1026P,RNU6-1253P,RP5-850O15.3,RP5-850O15.4,Y_RNA:361	S2(3.8)	0
chr7	83567500	84122040	555	7q21.11	1.607	SEMA3A	S2(4.4)	0
chr21	22369500	22924500	555	21q21.1	0.128	AP001136.2,AP001137.1,NCAM2	S4(1.7)	0
chr14	80854100	81408500	554	14q31.1	0.34	CEP128,DIO2-AS1,RP11-757H14.2	S3(3.4)	0
chr5	136287500	136835500	548	5q31.2	0.244	RNA5SP193,SPOCK1	S2(3.7)	0
chr11	87133500	87679500	546	11q14.2	0.048	CTD-2028E8.1,RNU6-1063P,RNU6-1135P,RP11-665E10.1,RP11-665E10.3,RP11-665E10.5,RP11-720D4.3	S3(3.3)	0
chr2	45877500	46423500	546	2p21	0.602	AC017006.2,AC017006.3,AC017078.1,PRKCE,U51244.2	S1(5)	0
chr9	28670283	29215500	545	9p21.1	0.307	MIR873,MIR876	G2(1.3)	0
chr3	106416500	106959488	543	3q13.12	0.027	FCF1P3,LINC00882,MTND1P16,MTND2P14,MTND3P6,MTND4P16,MTND5P16,MTND6P6,RNU6-1308P,RP11-52L11.4,RP11-52L11.6,RP11-52L11.7,RP11-52L11.9,RP11-561O4.1	S2(3.5)	0
chr6	152417500	152959500	542	6q25.1-2	0.501	ESR1,RNA5SP223,RP11-133I21.2,RP3-398G3.5,SYNE1,SYNE1-AS1	S3(3)	0
chr12	1099500	1639056	540	12p13.33	0.942	ERC1,LINC00942,RN7SL852P,RP11-359B12.2,RP5-951N9.1,RP5-951N9.2	S1(5.3)	0.524	2		2
chr4	12950294	13487500	537	4p15.33	0.284	HSP90AB2P,RAB28,RNU6-962P	S4(2.4)	0
chr6	155049500	155585146	536	6q25.2-3	1.311	AL121952.1,MIR1273C,RNU6-824P,RP11-477D19.2,RP3-472M2.2,SCAF8,TFB1M,TIAM2,U8:24	S1(5.1)	0
chr5	19454500	19989500	535	5p14.3	0.46	AC118463.1,CDH18	S4(2.2)	0
chr11	9781080	10315754	535	11p15.4	1.152	RNU7-28P,RP11-1H15.1,RP11-1H15.2,RP11-351I24.3,RP11-748C4.1,SBF2,SBF2-AS1	S1(5.3)	0
chr7	18534500	19067500	533	7p21.1	1.287	AC004744.3,HDAC9,NPM1P13,RN7SKP266,TWIST1	S2(3.8)	0
chr1	41970500	42502500	532	1p34.2	0.242	AL451006.1,HIVEP3,RP11-486B10.3,RP11-486B10.4	S1(4.7)	0
chr7	81543500	82074500	531	7q21.11	0.604	AC005159.1,AC006145.1,CACNA2D1,MIR1255B1	S2(3.5)	0
chr7	31582500	32111500	529	7p14.3	3.104	AC006377.1,CCDC129,PDE1C,PPP1R17,SNX2P2	S2(3.8)	0
chr3	120628500	121155500	527	3q13.33	0.041	MIR5682,POLQ,RP11-10G15.4,RP11-500K19.2,RP11-678L1.1,STXBP5L	S3(2.6)	0
chr5	107191500	107718500	527	5q21.3	0.579	FBXL17	S3(2.6)	0
chr2	168148500	168675181	527	2q24.3	0.037	AC016723.4,AC074363.1,CTAGE14P,RNU7-148P	S4(2.2)	0
chr5	9025500	9551500	526	5p15.31	2.214	CTD-2201E9.1,CTD-2201E9.2,CTD-2201E9.4,CTD-2215L10.1,MIR4636,SEMA5A,SNHG18,SNORD123	S1(4.7)	0
chr17	64293500	64817500	524	17q24.2	3.524	AC006947.1,MIR634,PRKCA,RN7SL735P,RNA5SP445,RNU6-928P,RP11-4F22.2	S1(4.8)	0
chr6	78445500	78967500	522	6q14.1	0.061	MEI4,SNORD112:40	S4(1.8)	0
chr6	56298011	56820500	522	6p12.1	4.321	BEND6,DST,RNU6-626P,RP11-472M19.2,RPL17P26	S1(5)	0.396	1		1
chr10	128589500	129259500	520	10q26.2	1.104	DOCK1,FAM196A,RP11-223P11.2,RP11-223P11.3,Y_RNA:5	S4(2.4)	0
chr2	148777500	149297500	520	2q23.1	0.851	AC019070.1,MBD5,ORC4,SNORA48:8	S4(2.2)	0.204	1		1
chr2	15184500	15702500	518	2p24.3	0.741	NBAS,RP11-32P22.1	S4(2)	0
chr13	60225500	60743500	518	13q21.2	1.481	DIAPH3,DIAPH3-AS1,DIAPH3-AS2,RN7SL375P	S3(3.1)	0
chr14	76043500	76559500	516	14q24.3	0.378	AC007182.6,C14orf1,FLVCR2,IFT43,RNA5SP387,RP11-270M14.1,RP11-270M14.4,RP11-270M14.5,RP11-507E23.1,RP11-98L12.2,TGFB3,TTLL5	S2(4)	0
chr9	16356500	16871500	515	9p22.2-3	1.469	BNC2,RP11-183I6.2,RP11-335H2.2,RP11-62F24.1,RP11-62F24.2	S1(4.8)	0
chr8	107282500	107794500	512	8q23.1	0.192	ABRA,OXR1,RNU7-84P,RP11-395G23.3,RP11-649G15.2,TAGLN2P1	S3(3.2)	0
chr6	101337478	101846663	509	6q16.3	0.048	RP3-467N11.2,snoU13:356	S3(3)	0
chr18	33877676	34384500	507	18q12.2	0.23	FHOD3,SNORD112:20,TPGS2	S1(4.6)	0.077	1		1
chr5	15499500	16005500	506	5p15.1	1.406	CTD-2350J17.1,FBXL7,MIR887	S3(3.2)	0
chr5	92944500	93448500	504	5q15	0.53	FAM172A,MIR2277,NPM1P27,POU5F2,RP11-185E12.2,RP11-549J18.1	S3(3.4)	0
chr9	3803500	4305500	502	9p24.2	0.969	GLIS3,GLIS3-AS1,RP11-252M18.3,RP11-358M14.2,RP11-70J12.1	S1(4.7)	0
chr8	119632500	120131500	499	8q24.12	0.071	COLEC10,RNU6-12P,RP11-278I4.1,RP11-278I4.2,RPS26P35,SAMD12,TNFRSF11B	S1(5.4)	0
chr18	66381500	66879513	498	18q22.1-2	0.274	CCDC102B,RNU6-39P,RP11-106E15.1,RP11-861L17.2,RP11-861L17.3,SDHCP1,TMX3	S3(2.8)	0
chr12	26489883	26987500	498	12p11-12	0.507	ITPR2,RNA5SP354,RP11-513G19.1,RP11-666F17.1,RP11-666F17.2	S2(4.4)	0
chr7	111354500	111847500	493	7q31.1	0.11	AC003080.4,DOCK4,DOCK4-AS1,RNA5SP237,ZNF277	S3(2.8)	0
chr7	137039229	137531838	493	7q33	0.604	AC009245.3,DGKI	S1(4.6)	0
chr10	12390500	12880500	490	10p13	0.032	CAMK1D,MIR4480,MIR548Q,RNU6ATAC39P,SNORD45:1	S3(2.8)	0
chr17	61038500	61527500	489	17q23.2-3	4.578	AC015923.1,AC037445.1,CYB561,RP11-180P8.1,RP11-180P8.3,RP11-180P8.4,RP11-180P8.5,RP11-269G24.2,RP11-269G24.3,RP11-269G24.4,RP11-269G24.7,RP11-269G24.8,RP11-556O9.2,RP11-556O9.3,RP11-556O9.4,TANC2	S1(4.9)	0
chr14	89599500	90086500	487	14q31-32	0.7	CAP2P1,FOXN3,FOXN3-AS1,FOXN3-AS2,RP11-33N16.2,RP11-33N16.3,RP11-356K23.1,RP11-356K23.2,Y_RNA:140	S2(3.8)	0
chr6	38122500	38608500	486	6p21.2	0.482	AL031905.1,BTBD9,BTBD9-AS1,RP1-319M7.2,SNORD45:4,Y_RNA:626	S1(4.8)	0
chr6	16277500	16762500	485	6p22.3	2.529	AL034375.1,ATXN1,GMPR,RP1-151F17.1	S1(4.9)	0
chr9	112541500	113025500	484	9q31.3	2.022	AKAP2,C9orf152,PALM2,PALM2-AKAP2,RP11-151F5.2,TXN	S1(5.4)	0
chr1	8403500	8886500	483	1p36.23	0.772	RERE,RP4-633I8.1,RP4-633I8.2,RP4-633I8.3,RP4-633I8.4,RP5-1115A15.1,RP5-1115A15.2,SLC45A1,SNORA77:3,Y_RNA:366	S1(5.4)	0
chr8	119153500	119635500	482	8q24.11-12	1.057	AC023590.1,SAMD12	S1(5.3)	0
chr6	140699500	141181500	482	6q24.1	0.049	AL356137.1,MIR4465,RP3-460G2.2,RPS3AP24	S2(4.1)	0
chr5	93474500	93955500	481	5q15	0.078	AC093311.1,ANKRD32,CTC-303L1.1,CTC-303L1.2,KIAA0825,MTND5P12,MTND6P3,RP11-461G12.2	S3(3.1)	0
chr22	47158500	47637500	479	22q13.31	0.777	TBC1D22A,Z97351.1	S2(3.9)	0
chr10	257500	736500	479	10p15.3	1.411	AL603831.1,DIP2C,MIR5699,PRR26,RN7SL754P,RNA5SP298,RP11-490E15.2,RP11-809C18.3,RP11-809C18.4,RP11-809C18.5,ZMYND11	S2(4.4)	0
chr9	15552500	16030500	478	9p22.3	0.05	CCDC171,HMGN2P16,RNU6-14P	S2(3.9)	0
chr16	86948500	87425748	477	16q24.1-2	0.269	C16orf95,FBXO31,MAP1LC3B,RP11-134D3.1,RP11-134D3.2,RP11-178L8.1,RP11-178L8.4,RP11-178L8.5,RP11-178L8.7,RP11-178L8.8,RP11-178L8.9,RP11-899L11.1,RP11-899L11.3,snoU13:109	S1(4.6)	0
chr1	59761500	60238466	477	1p32.1	0.288	FGGY,MIR4711,RP4-782L23.2	S2(4.3)	0
chr5	142149500	142626500	477	5q31.3	0.176	ARHGAP26,ARHGAP26-AS1,ARHGAP26-IT1	S1(5.2)	0
chr18	72264500	72790500	476	18q22.3	0.762	LINC00909,ZNF407	S3(3)	0
chr7	7679500	8153654	474	7p21.3	0.547	AC006042.7,AC006042.8,AC006465.4,AC007161.5,AC009473.1,GLCCI1,GS1-165B14.2,ICA1,RNU6-534P,RPA3,RPA3-AS1,RPL23AP51	S3(3.4)	0
chr5	112354500	112825500	471	5q22.2	0.048	CTD-2201G3.1,DCP2,MCC,TSSK1B	S2(4.2)	0
chr7	43152500	43622356	470	7p13-14	0.474	AC004692.4,AC004692.5,AC011738.1,AC011738.4,HECW1,HECW1-IT1,MIR3943,RNU6-575P,RNU7-35P	S1(4.5)	0
chr15	62681500	63150500	469	15q22.2	0.622	AC103740.1,MIR190A,RP11-1069G10.1,RP11-625H11.1,RP11-625H11.2,TLN2	S1(5)	0
chr7	101459500	101928404	469	7q22.1	0.948	AC005086.1,AC005086.2,AC005086.3,AC005086.4,AC005088.1,CTA-339C12.1,CTA-357J21.1,CTB-181H17.1,CUX1,SNORA48:12	S2(4.3)	0
chr12	115738513	116206500	468	12q24.21	0.3	RN7SL865P,RP11-1028N23.2,RP11-1028N23.3,RP11-1028N23.4,RP11-110L15.1,RP11-116D17.1,UBA52P7	S1(4.5)	0
chr17	70622500	71089500	467	17q24-25	0.611	AC080037.1,CTD-3010D24.3,LINC00511,RN7SKP180,RP11-171G2.1,RP11-766H1.1,RPL32P33,SCARNA24:1,SLC39A11	S2(4.1)	0
chr2	33171500	33638500	467	2p22.3	0.147	AL133244.1,LTBP1,RNA5SP91,RNA5SP92,SNORD112:34	S1(5.2)	0
chr6	37786500	38252500	466	6p21.2	1.978	BTBD9,RN7SL285P,RNU1-87P,RP11-420A21.1,RP3-441A12.1,SNORD45:4,ZFAND3	S1(4.7)	0
chr7	127286500	127750500	464	7q32.1	2.421	AC073934.6,LRRC4,MIR593,RP11-20L24.1,SND1	S2(4.1)	0
chr13	100740500	101204500	464	13q32.3	0.877	GGACT,PCCA,PCCA-AS1,RP11-151A6.4,RP11-340C20.3,RPL15P18,RPS26P47	S3(2.9)	0
chr4	16437500	16901500	464	4p15.32	0.95	LDB2,RP11-446J8.1	S2(3.8)	0
chr1	185702500	186165500	463	1q25-31	0.112	GS1-174L6.4,HMCN1	S2(4.1)	0
chr8	49292500	49755500	463	8q11.21	0.2	AC026904.1,EFCAB1,RP11-567J20.1,RP11-567J20.2,RP11-567J20.3,RP11-770E5.1,RP11-770E5.2,RP11-770E5.3,RPL29P19	S1(4.8)	0
chr3	157826500	158288951	462	3q25.32	0.434	RP11-113A11.1,RP11-538P18.1,RP11-538P18.2,RSRC1	S2(3.6)	0
chr1	210846500	211307500	461	1q32.2	0.037	HHAT,IPO8P1,KCNH1,KCNH1-IT1	S3(3.1)	0
chr8	48230500	48691500	461	8q11.21	0.555	CEBPD,PRKDC,RNU6-665P,RP11-697N18.1,RP11-697N18.2,RP11-697N18.3,RP11-697N18.4,SPIDR	S2(3.9)	0
chr6	157097500	157558500	461	6q25.3	1.573	ARID1B,MIR4466,RP1-137K2.2,RP11-230C9.2,RP11-230C9.3,RP11-2J18.1	S2(3.7)	0
chr9	113342160	113801500	459	9q31.3	2.652	LPAR1,MUSK,RNU6-432P,RP11-410K21.2,RP13-461N9.2,Y_RNA:732	S1(5.4)	0
chr14	65802500	66261500	459	14q23.3	1.016	EIF1AXP2,FUT8,MIR625,RPL21P8	S2(4.3)	0
chr18	70901500	71359500	458	18q22.3	0.266	CTD-2354A18.1,RP11-169F17.1	S2(3.5)	0
chr17	55333500	55791500	458	17q22	1.208	MSI2,RN7SL437P,RN7SL449P,RNU7-134P,RP11-118E18.2,RP11-118E18.4	S2(4.1)	0
chr10	32734500	33190500	456	10p11.22	0.09	C10orf68,C1DP1,CCDC7,ITGB1,RP11-479G22.8	S1(4.7)	0
chr5	155752500	156208500	456	5q33.3	0.417	CTB-56J15.1,CTC-340I23.2,SGCD	S4(2)	0
chr5	108082500	108538500	456	5q21.3	1.239	CTC-329H14.1,CTD-2197I11.1,FER,GJA1P1,RNU6-47P,RP11-47F1.1,Y_RNA:572	S3(3.4)	0
chr5	169056500	169512500	456	5q35.1	0.039	CTB-37A13.1,DOCK2,FAM196B,MIR378E	S1(4.8)	0
chr2	178483694	178938500	455	2q31.2	0.151	AC011998.1,AC011998.2,AC012499.1,API5P2,PDE11A,RNU6-629P	S3(3.1)	0
chr12	83079500	83533500	454	12q21.31	0.088	RNU6-977P,TMTC2	S4(1.8)	0
chr20	9031500	9485500	454	20p12.2-3	4.06	AL121898.1,PLCB4	S2(3.9)	0
chr5	144761233	145215500	454	5q32	0.182	CTB-73N10.1,CTB-78O21.1,PRELID2	S3(3)	0
chr4	140623500	141076500	453	4q31.1	0.162	MAML3,MGST2,RN7SKP253,RP11-392B6.1	S2(4.1)	0
chr12	77718500	78169562	451	12q21.2	0.089	AC073528.1,RP1-34H18.1,RP1-97G4.1	S2(3.6)	0
chr9	18472500	18922500	450	9p22.1-2	1.271	ADAMTSL1,AL158150.1,MIR3152,RN7SKP258,RP11-503K16.2	S2(4.3)	0
chr3	23243500	23692500	449	3p24.3	0.684	AC092038.1,AC092038.2,AC121251.1,RNU6-788P,RNU6-922P,UBE2E2,UBE2E2-AS1,Y_RNA:490	S2(4.3)	0
chr1	86174116	86623500	449	1p22.3	0.09	COL24A1,RNA5SP51,RP4-682E18.1	S2(4.2)	0
chr3	67257500	67706500	449	3p14.1	1.164	NDUFB4P1,RP11-81N13.1,RP11-85I21.1,SUCLG2	S4(2.3)	0
chr5	170288500	170734500	446	5q35.1	0.429	CTC-455F18.3,RANBP17,RN7SL623P,RP11-546B8.3,snoU13:334	S3(3.1)	0
chrX	10633500	11129500	446	Xp22.2	0.057	HCCS,MID1,RP11-120D5.1	S2(4)	0
chr9	6756500	7202500	446	9p24.1	0.638	KDM4C,RP11-390F4.8,RP11-403H13.1	S3(3)	0
chr21	29600986	30047170	446	21q21.3	0.158	AF131217.1,LINC00161	S1(4.5)	0
chr8	12930500	13373500	443	8p22	1.888	DLC1,MTND4P7,RP11-10C8.2,Y_RNA:709	S1(4.9)	0
chr8	102696500	103137500	441	8q22.3	0.082	KB-1107E3.1,NCALD,snoU13:419	S3(3.1)	0
chr5	130696500	131137500	441	5q31.1	1.668	CDC42SE2,CTC-432M15.3,FNIP1,RAPGEF6	S2(3.8)	0
chr4	72051500	72491500	440	4q13.3	1.01	LDHAL6EP,RP11-1J11.1,SLC4A4	S2(3.9)	0
chr16	72259043	72699500	440	16q22.2	0.247	AC004158.2,AC004158.3,AC092289.1,RNU6-385P,RP11-328J14.2,RP5-991G20.1	S3(3.4)	0.221	1		1
chrX	7894500	8333500	439	Xp22.31	0.03	MIR651,PNPLA4,RP11-692P14.1,VCX2	S4(1.9)	0
chr4	145582509	146020500	438	4q31.21	0.242	ABCE1,ANAPC10,HHIP,HSPD1P5,RN7SKP235,RP13-539F13.2,RP13-539F13.3	S3(2.5)	0
chr12	46931284	47368500	437	12q13.11	0.123	OR7A19P,RP11-446N19.1,RP11-66E20.2,SLC38A4	S1(5)	0
chr12	78224684	78661500	437	12q21.2	2.836	NAV3,RP11-136F16.1,RP11-136F16.2	S2(3.5)	0
chr16	53736500	54173500	437	16q12.2	0.905	AC007347.1,FTO,FTO-IT1,RP11-357N13.1,RP11-357N13.2,RP11-357N13.3,RPGRIP1L	S3(2.8)	0
chr18	46551500	46988500	437	18q21.1	0.715	DYM,MIR4744,RP11-110H1.9,RP11-15F12.1,RP11-15F12.3,RP11-30L3.2	S1(4.9)	0
chr14	71782500	72217500	435	14q24.2	2.69	RN7SL683P,RP1-261D10.1,RP1-261D10.2,SIPA1L1,SNORD56B	S1(4.6)	0
chr3	78634500	79069500	435	3p12.3	0.666	RN7SL751P,ROBO1,RP11-588D3.1	S3(2.5)	0
chr2	44587500	45020500	433	2p21	0.154	AC067957.1,CAMKMT,PREPL	S2(3.6)	0
chr8	131029375	131461500	432	8q24.21	5.698	AC131568.1,ASAP1,RNU6-1255P,SNORA12:3	S1(5.2)	0
chr5	53176881	53607500	431	5q11.2	0.503	ARL15,MIR4459,MIR581,RN7SL801P,RNU6-272P	S2(4.2)	0
chr7	1841500	2272878	431	7p22.3	0.421	AC110781.3,MAD1L1,MIR4655	S2(4.4)	0
chr1	62207500	62636500	429	1p31.3	0.255	INADL,LAMTOR5P1,MIR3116-1,RN7SL180P,RNU6-1177P,RNU6-414P,RP11-430G17.3	S3(3.2)	0
chr11	131779500	132208500	429	11q25	0.144	NTM,NTM-IT,RP11-697E14.2	S2(4)	0
chr3	136043500	136471500	428	3q22.3	1.557	HMGN1P10,PCCB,RNU6-1284P,RNU6-789P,RNU7-198P,RNY4P4,RP11-102M11.1,RP11-102M11.2,STAG1	S1(4.6)	0
chr17	78517500	78944500	427	17q25.3	1.52	CTD-2561B21.3,CTD-2561B21.4,CTD-2561B21.5,RP11-28G8.1,RPL31P7,RPTOR	S1(4.9)	0
chr12	101110500	101536500	426	12q23.1	0.729	ANO4,RP11-263E1.1,RP11-350G24.1,RP11-350G24.2	S3(3.3)	0
chr12	72665500	73088500	423	12q21.1	2.221	CHCHD3P2,RP11-98E6.1,TRHDE,TRHDE-AS1	S3(2.6)	0
chrX	41361500	41783500	422	Xp11.4	0.333	CASK,CASK-AS1,GPR34,GPR82,RN7SL144P,RN7SL406P,RNU6-1321P,RNU6-202P,RP11-204C16.4,RP5-1174J21.1,RP5-1174J21.2	S2(3.8)	0
chr2	220548500	220970376	422	2q35	0.14	AC008281.1,AC009310.1,AC009502.1,AC009502.4,MIR4268,RPL23P4	S2(3.8)	0
chrX	67234743	67654500	420	Xq12	0.485	OPHN1,RNU6-1225P,RP11-516A11.1,RP11-516A11.3,Y_RNA:779	S2(3.5)	0
chr2	945500	1365500	420	2p25.3	0.112	AC108462.1,AC114808.2,AC114808.3,AC116614.1,SNTG2	S4(2.3)	0
chr1	240250500	240669500	419	1q43	5.204	ADH5P3,AL646016.1,FMN2,GREM2,RP11-177F11.1,RP11-567G24.1,RP11-567G24.3,Y_RNA:307,Y_RNA:347	S1(4.9)	0
chr11	95658479	96076344	418	11q21	3.548	MAML2,MIR1260B,RP11-697H10.1	S1(5.2)	0
chr1	64238500	64656500	418	1p31.3	0.059	CFL1P3,RNU6-809P,ROR1,RP11-24J23.2,RP4-597J3.1,Y_RNA:363	S1(4.6)	0
chr2	197041227	197458500	417	2q32-33	1.33	AC020571.3,HECW2,RN7SL820P,snoU13:263	S1(4.9)	0
chr7	130789500	131205500	416	7q32.3	0.914	AC008264.4,AC009362.2,MKLN1,MKLN1-AS1,MKLN1-AS2,PODXL,RP11-180C16.1	S1(5.3)	0
chr18	34408500	34823738	415	18q12.2	0.217	CELF4,KIAA1328,RP11-58G13.1,RP11-95O2.1,TPGS2	S3(3.3)	1	1		1
chr3	170765500	171179500	414	3q26.2-31	0.463	MIR569,TNIK,Y_RNA:485	S1(4.9)	0
chr4	40804500	41217500	413	4p13-14	1.525	APBB2,NSUN7,RNA5SP160,RNU6-1195P,RNU6-836P,RP11-632F7.3,Y_RNA:560,snoU13:326	S1(4.5)	0
chr12	64236500	64648500	412	12q14.2	3.52	C12orf66,RNU5A-7P,RNU6-1009P,RP11-1029F8.1,RP11-196H14.2,RP11-196H14.3,RP11-196H14.4,RP11-274J7.2,RP11-274J7.3,RPL36AP41,RPS11P6,SRGAP1	S1(5.2)	0
chr1	39546987	39957500	411	1p34.3	1.728	BMP8A,KIAA0754,MACF1,RNA5SP44,RNU6-608P,RP11-416A14.1,RP11-420K8.1,RP11-420K8.2	S1(5.2)	0
chr4	20252500	20661500	409	4p15.31	2.844	MIR218-1,SLIT2,SLIT2-IT1	S2(4)	0
chr4	148651500	149059500	408	4q31.23	1.533	ARHGAP10,MIR4799,NR3C2,RN7SL254P,RNA5SP165,RP11-315D13.1	S1(4.6)	0
chr12	28342500	28750500	408	12p11.22	0.594	CCDC91,RNA5SP355,RNU4-54P,RP11-874G11.1,RP11-967K21.1	S3(3.3)	0
chr5	153417500	153825516	408	5q33.2	0.77	AC008625.1,AC010295.1,FAM114A2,GALNT10,HNRNPA3P7,MFAP3,MIR1294,RN7SL655P,SAP30L-AS1	S2(4.4)	0
chr4	123844228	124251500	407	4q28.1	0.701	AC109357.1,CTB-51E13.1,SPATA5	S2(4.3)	0
chr9	17134500	17540500	406	9p22.2	0.503	CNTLN,RP11-492A12.2	S2(3.7)	0
chr10	13645500	14051500	406	10p13	1.524	AL157392.1,FRMD4A,PRPF18,RNA5SP301,RP11-142M10.2,RP11-295P9.12,RP11-295P9.3,RP11-295P9.6,RP11-295P9.8,RP11-308K19.2,RP11-353M9.1	S1(5)	0.072	1		1
chr2	144684500	145090500	406	2q22.3	0.288	AC016910.1,GTDC1	S2(3.5)	0
chr13	42131500	42536500	405	13q14.11	0.526	KARSP1,MIR5006,RN7SL515P,RNU6-74P,VWA8	S1(4.9)	0
chr10	60271500	60675500	404	10q21.1	2.068	BICC1,FAM133CP,RN7SKP196	S1(4.6)	0
chr14	61188500	61591500	403	14q23.1	1.059	MNAT1,RNU6-398P,RP11-193F5.1,RP11-193F5.4,RP11-307P22.1,SIX4,SLC38A6,SRMP2,TRMT5	S1(4.8)	0
chr5	37378500	37780500	402	5p13.2	0.669	RNU6-1190P,RNU6-484P,RP11-648M2.2,WDR70	S1(5)	0
chrX	6666500	7067500	401	Xp22.31	0.185	HDHD1,MIR4767,RP11-483M24.2,RP13-926M18.1	S3(2.7)	0
chr5	14142500	14543500	401	5p15.2	7.227	TRIO	S1(5)	0
chr3	171752500	172152500	400	3q26.31	2.864	AC092964.1,AC092964.2,BZW1P1,FNDC3B,RN7SL141P,RP11-423E7.1	S2(4.3)	0
chr6	100935500	101334500	399	6q16.3	2.138	ASCC3,RP1-121G13.3,RP3-467N11.1	S2(4.2)	0
chr8	88946500	89345500	399	8q21.3	0.819	CTB-118P15.2,MMP16,RP11-586K2.1	S3(2.6)	0
chr1	210501500	210900500	399	1q32.2	0.131	HHAT,KCNH1,RNU5A-8P,RP5-879K22.1	S2(4.1)	0
chr5	94019500	94417500	398	5q15	0.195	ANKRD32,CTC-484P3.1,CTC-484P3.3,CTC-558O19.1,MCTP1	S3(2.8)	0
chr8	89338500	89734500	396	8q21.3	0.04	MMP16,RNA5SP272,RP11-586K2.1,RP11-69I13.1	S3(2.7)	0
chr13	39782500	40178500	396	13q13-14	1.089	LHFP,snoU13:70	S3(3.1)	0
chr2	214686500	215082500	396	2q34	0.021	SPAG16	S3(2.7)	0
chr10	116188500	116583500	395	10q25.3	0.121	ABLIM1,FAM160B1,PPIAP19,RP11-106M7.1,RP11-317F20.2,TAF9BP2,snoU13:5	S1(4.7)	0
chr3	81417172	81811312	394	3p12.2	1.66	GBE1,RNU2-28P,RP11-142L1.3,SETP6	S3(3.4)	0
chr1	178057500	178449741	392	1q25.2	1.754	RASAL2,RASAL2-AS1,RP11-21M7.2,RP4-765C7.2	S1(5)	0
chr9	20657500	21049500	392	9p21.3	0.741	FOCAD,MIR491,PTPLAD2,RP11-4E23.2,SNORA30:3	S2(3.9)	0
chr18	42259500	42651500	392	18q12.3	0.103	MIR4319,RP11-456K23.1,SETBP1	S2(3.8)	0
chr17	30814500	31205500	391	17q11.2	0.406	AC084809.2,CDK5R1,MYO1D,RP11-220C2.1,RP11-466A19.1,RP11-466A19.3,RP11-466A19.5,RP11-466A19.6,RP11-466A19.8,Y_RNA:241	S2(4.3)	0
chr2	232825500	233216500	391	2q37.1	0.732	AC068134.10,AC105461.1,DIS3L2,ECEL1P3,MIR562	S2(4)	0
chr5	61601500	61992500	391	5q12.1	0.771	CKS1B:2,DIMT1,IPO11,KIF2A,LRRC70,RNU6-661P,RP11-95I19.1,RP11-95I19.2	S3(2.5)	0
chr18	54317500	54707500	390	18q21.31	0.55	RP11-383D22.1,TXNL1,U3:22,WDR7,WDR7-UT1,Y_RNA:272	S3(3.3)	0
chr2	19156500	19546509	390	2p24.1-2	0.129	AC092594.1	S1(4.5)	0
chr1	21113816	21503500	390	1p36.12	1.411	AL031005.1,EIF4G3,MIR1256,RNU7-200P,RP11-487E1.2,RP11-628K18.1,RPS15AP6	S1(5.2)	0
chr21	30670500	31059500	389	21q21.3	1.237	AP000240.9,BACH1,BACH1-AS1,BACH1-IT1,BACH1-IT2,BACH1-IT3,GRIK1,GRIK1-AS2,RP11-313P22.1,snoU13:217	S2(4.2)	0
chr7	76578500	76967500	389	7q11.23	0.057	AC005522.7,AC007000.10,AC007000.11,AC007000.12,AC073635.5,AC114737.3,CCDC146,DTX2P1,DTX2P1-UPK3BP1-PMS2P11,FAM185BP,FDPSP7,FGL2,GSAP,PMS2P11,PMS2P9,RP11-467H10.1,RP11-467H10.2,SPDYE9P,UPK3B,UPK3BP1,Y_RNA:670,Y_RNA:671	S1(4.6)	0
chr9	97487500	97875989	388	9q22.32	1.879	C9orf3,FANCC,MIR2278,MIR23B,MIR27B,MIR3074,RP11-49O14.2,RP11-49O14.3,RP11-54O15.3	S1(5)	0
chr1	61541500	61929500	388	1p31.3	0.059	AC096534.1,NFIA,RP4-802A10.1,RP5-833A20.1	S3(3.1)	0
chr18	65182500	65569500	387	18q22.1	0.07	DSEL,RP11-28O3.1,RP11-28O3.2,RP11-29O13.1,RP11-638L3.1,RP11-638L3.2,RP11-638L3.3,RP11-638L3.4	S2(3.9)	0
chr15	57205500	57592562	387	15q21.3	2.102	AC010999.1,HNRNPA3P11,TCF12,ZNF280D,snoU13:97	S1(4.5)	0
chr10	127693500	128078500	385	10q26.2	0.501	ADAM12,FANK1,RNA5SP328,RP11-81B10.2	S2(4)	0
chr14	32029500	32414058	385	14q12	0.231	CTD-2213F21.3,NUBPL,RNU6-455P,RNU6-602P,RP11-159D23.2	S2(3.8)	0
chr20	13235500	13620500	385	20p12.1	0.287	GAPDHP2,ISM1,TASP1	S3(3)	0
chr14	64319500	64704500	385	14q23.2	0.243	ESR2,MIR548H1,SYNE2	S2(4.3)	0
chr11	102980159	103364500	384	11q22.3	0.397	DYNC2H1,MTND1P36,MTND2P26,RP11-37O16.3,RP11-37O16.4,RP11-37O16.6,RP11-37O16.7,RP11-37O16.8	S1(4.7)	0
chr15	85922500	86305500	383	15q25.3	2.854	AKAP13,CTD-2262B20.1,KLHL25,RNU6-1280P,RNU7-79P,RP11-158M2.2,RP11-158M2.3,RP11-158M2.4,RP11-158M2.5,RP11-815J21.1,RP11-815J21.2,RP11-815J21.3,RP11-815J21.4	S1(4.8)	0
chr8	9910500	10291181	381	8p23.1	0.552	AC023385.1,MSRA,RP11-1E4.1,RP11-212F11.1	S4(2.4)	0
chr6	147144500	147525500	381	6q24.3	0.042	RP11-497D6.3,RP11-497D6.5,RP3-337D23.3,STXBP5-AS1	S2(4.1)	0
chr2	109743500	110266500	381	2q12-13	0.307	MIR4265,MIR4266,SH3RF3,SH3RF3-AS1,SNRPGP9	S1(5.2)	0
chr5	141703500	142083346	380	5q31.3	0.135	AC005215.1,AC005370.1,AC005592.2,FGF1,RPS12P10,SPRY4	G1(5.5)	0
chr2	135910500	136289500	379	2q21.3	0.176	AC064850.4,R3HDM1,RAB3GAP1,ZRANB3	S2(3.5)	0
chr7	27841500	28220500	379	7p15.1-2	2.128	JAZF1,JAZF1-AS1,RN7SL365P,RNU6-979P,TAX1BP1	S2(4.3)	0
chr4	108263500	108642500	379	4q25	0.326	PAPSS1,RNU6-551P	S3(3.1)	0
chr12	116337500	116715500	378	12q24.21	3.227	AC060226.1,MED13L,MIR620,RNU6-1188P,RP11-115H15.1,RP11-115H15.2,RP11-493P1.2	S1(4.5)	0
chr15	35461899	35839500	378	15q14	0.33	ANP32AP1,DPH6,DPH6-AS1,HNRNPA1P45,MIR3942,RP11-139F4.2,RP11-150L8.3,RP11-150L8.4	S2(3.6)	0
chr10	114205500	114583248	378	10q25.2	0.793	MIR4295,RP11-214N15.5,RP11-25C19.3,VTI1A,ZDHHC6	S2(4.1)	0
chr16	17188784	17565500	377	16p12.3	1.627	CTD-2576D5.2,CTD-2576D5.4,XYLT1	S3(3.3)	0
chr7	105926772	106302500	376	7q22.3	0.403	AC004917.1,CCDC71L,CTB-111H14.1,CTB-30L5.1,LARP1BP2	S1(5)	0
chr10	64906500	65282500	376	10q21.3	2.092	JMJD1C,JMJD1C-AS1,MIR1296,NRBF2,PRELID1P3,REEP3,RP11-351O1.3,RP11-351O1.4,TATDN1P1	S2(4)	0
chr12	40126500	40501500	375	12q12	0.072	AC121336.1,C12orf40,RPL30P13,SLC2A13,SNORA22:1	S4(1.9)	0
chr15	33051500	33425500	374	15q13.3	0.793	FMN1,HNRNPA1P71,RP11-758N13.3,SNORD77:1,snoU13:85	S1(5.4)	0
chr12	105723500	106097980	374	12q23.3	3.253	C12orf75	S1(5)	0
chrX	140270500	140644500	374	Xq27.1-2	0.051	GS1-164F24.1,LDOC1,RBMX2P2,SPANXA2-OT1,SPANXC	S4(2.3)	0
chr18	52884500	53258500	374	18q21.2	3.205	MIR4529,RP11-619L19.1,RP11-619L19.2,TCF4	S2(3.9)	0
chr5	33520500	33893500	373	5p13.2-3	0.546	ADAMTS12,CTD-2233C11.2,RNU6-923P	S1(4.9)	0
chr8	128805500	129178500	373	8q24.21	2.144	MIR1205,MIR1207,MIR1208,PVT1,RNU1-106P,RNU4-25P,TMEM75	S1(5.2)	0
chr6	89302500	89674500	372	6q15	0.72	AL079342.1,RNGTT,SNORA73:6	S4(2.3)	0
chr7	106833745	107204959	371	7q22.3	0.704	AC004492.1,COG5,CTB-20D2.1,DUS4L,GPR22,HBP1	S2(4.2)	0
chrX	19535500	19905719	370	Xp22.12	0.636	SH3KBP1	S1(4.7)	0
chr4	121475500	121845500	370	4q27	0.466	PRDM5,RNU6-550P,RP11-501E14.1,SETP12	S4(2.2)	0
chr5	102594402	102963500	369	5q21.1-2	1.099	AC010423.1,C5orf30,CTD-2154H6.1,CTD-2193G5.1,NUDT12	S1(5.4)	0
chr2	40315500	40684500	369	2p22.1	2.272	AC007377.1,SLC8A1,SLC8A1-AS1	S2(4.4)	0
chr5	8477500	8845500	368	5p15.31	0.038	MTND6P2,RP11-143A12.3,RP11-315A16.1,RP11-417J1.1,RP11-417J1.3	S2(3.5)	0
chr2	43456500	43824500	368	2p21	0.476	AC010883.5,RNU6-958P,THADA	S1(5.2)	0
chr13	101702500	102069500	367	13q33.1	0.046	NALCN,NALCN-AS1	S2(3.8)	0
chr14	37666500	38033251	367	14q13-21	0.209	MIPOL1,RNU6-886P,RP11-356O9.2	S3(2.8)	0
chr3	143689500	144055500	366	3q24	0.099	C3orf58,RNA5SP144	S3(2.9)	0
chr8	141645718	142011500	366	8q24.3	2.024	MIR151A,PTK2,RNA5SP278	S1(5.4)	0
chr5	134368500	134734969	366	5q31.1	0.22	CTC-276P9.1,CTC-276P9.2,CTC-276P9.3,CTC-349C3.1,CTC-349C3.2,H2AFY,PITX1	S1(5.1)	0
chr17	9114500	9480500	366	17p13.1	0.435	AC087501.1,NTN1,RP11-565F19.2,RP11-565F19.3,RP11-565F19.4,RP11-85B7.4,STX8,WDR16	S4(2.3)	0
chr1	243649500	244014500	365	1q43-44	1.806	AKT3,AKT3-IT1,FABP7P1,RP11-269F20.1,RP11-370K11.1,SDCCAG8	S2(4.3)	0
chr5	115419500	115783242	364	5q23.1	0.535	AC010296.1,COMMD10,CTC-339F2.2,CTD-2287O16.5,HMGN2P27,RNU6-644P,SEMA6A	S3(2.8)	0
chr5	110950500	111313500	363	5q22.1	0.209	HMGN1P14,NREP,NREP-AS1,RN7SKP57,STARD4-AS1	S2(4)	0
chr12	10962767	11325500	363	12p13.2	1.056	AC018630.1,PRH1,PRH2,PRR4,RNU6-676P,RP11-144O23.8,RP11-673D15.7,RP11-785H5.1,RP11-785H5.2,TAS2R10,TAS2R12,TAS2R13,TAS2R14,TAS2R15,TAS2R18,TAS2R19,TAS2R20,TAS2R30,TAS2R31,TAS2R43,TAS2R46,TAS2R50,TAS2R63P,TAS2R64P	S3(3.1)	0
chrX	17392500	17755587	363	Xp22.13	0.265	MIR4768,NHS,NHS-AS1,RP1-60N8.1,RP3-389A20.5	S3(3)	0
chr3	99536677	99898410	362	3q12.1	0.333	CMSS1,FILIP1L,MIR3921	S1(5.1)	0
chr14	30035500	30397500	362	14q12	1.228	AL356756.1,CTD-2503I6.1,PRKD1,RNU6-1234P	S3(3.3)	0
chrX	63005426	63366932	362	Xq11.2	0.026	HNRNPDP1,MIR1468,RP11-403E24.1	S3(2.7)	0
chr10	95753500	96114500	361	10q23.33	0.075	HDAC1P1,NOC3L,PLCE1,PLCE1-AS1,RNU6-657P,RNY4P26,RP11-162K11.4,RP11-391J2.3,RP11-429H9.4,RP11-76P2.4	S1(4.7)	0
chr7	47261500	47621500	360	7p12.3	1.508	TNS3	S1(4.8)	0
chrX	128298500	128658500	360	Xq25	0.336	RNA5SP513,RPS26P56,SMARCA1	S2(3.7)	0
chr2	239962500	240322500	360	2q37.3	0.377	AC017028.1,AC017028.10,AC017028.2,AC017028.3,AC017028.4,AC017028.5,AC017028.6,AC017028.7,AC017028.8,AC017028.9,HDAC4,MIR2467,MIR4269,MIR4440,MIR4441	S2(4.2)	0
chr4	89619386	89979500	360	4q22.1	0.397	FAM13A,FAM13A-AS1,HERC3	S2(4.4)	0
chr4	66178500	66537500	359	4q13.1	0.147	EPHA5,RP11-408P14.1,RP11-807H7.1	G2(1.4)	0
chr3	31664500	32023500	359	3p23	0.299	OSBPL10,OSBPL10-AS1,STT3B,ZNF587P1,ZNF860	S3(2.7)	0
chr5	80689500	81046500	357	5q14.1	0.999	ACOT12,SSBP2	S2(4)	0
chr13	38568857	38925500	357	13q13.3	0.126	LINC00571,UFM1	S3(3.3)	0
chr18	51397500	51751500	354	18q21.2	0.555	AC090666.1,MBD2,RP11-116K4.1,SNORA37	S3(3.1)	0
chr8	72755500	73108568	353	8q13.3	0.122	MSC,RP11-383H13.1,RPS20P20,TRPA1	S3(2.9)	0
chr1	68296500	68649500	353	1p31.3	0.074	AL157407.1,ARL5AP3,CTBP2P8,DIRAS3,GNG12,GNG12-AS1,MIR1262,RP4-609E1.2,WLS	S1(4.7)	0
chr6	136171500	136523500	352	6q23.3	0.339	AL360178.1,AL512290.1,COX5BP2,PDE7B,RP13-143G15.3,RP13-143G15.4	S2(3.6)	0
chr5	64426500	64777747	351	5q12.3	2.026	ADAMTS6,CTD-2194F4.2,CTD-2375G15.1,RPEP1	S1(5.2)	0
chr10	52033500	52384500	351	10q11.23	0.736	AC069547.1,AC069547.2,AL596137.1,RMRPP4,RNU7-107P,RP11-512N4.2,SGMS1	S2(3.7)	0
chr6	124934500	125285500	351	6q22.31	0.072	NKAIN2,RNF217,RP11-510H23.1	S3(3.2)	0
chr2	111903500	112253500	350	2q13	0.501	AC017002.1,AC017002.2,AC068491.2,AC068491.3,AC108463.1,AC108463.2,BCL2L11,MIR4435-1HG,MIR4435-2,RP11-181E10.3,RP11-803D5.4,RPS14P4	S1(5)	0
chr6	8434500	8784410	350	6p24.3	0.031	HULC,SLC35B3	S4(2)	0
chr11	72504726	72854500	350	11q13.4	1.664	AP002381.2,ATG16L2,FCHSD2,RNU6-672P	S1(5.2)	0
chr6	149067500	149416500	349	6q25.1	0.444	RP11-162J8.2,RP11-162J8.3,UST	S1(4.5)	0
chr3	104741500	105088500	347	3q13.11	0.057	ALCAM	S3(3.3)	0
chr4	41361500	41708500	347	4p13	1.353	LIMCH1,RP11-124A7.1,RP11-227F19.5	S1(4.5)	0
chr2	134877500	135224500	347	2q21.2-3	1.021	AC013718.1,AC016906.1,MGAT5,MIR3679,RNA5SP104,TMEM163	S3(3.2)	0
chr6	25278500	25625500	347	6p22.2	0.452	AL160037.1,LRRC16A,RNU6-987P,Y_RNA:641,snoU13:366	S3(2.8)	0
chr6	107436473	107782500	346	6q21	0.378	AL590489.1,AL591516.1,AL591516.2,AL591516.3,AL591516.4,AL591516.5,PDSS2,RNU6-1299P,RPS24P12	S2(3.5)	0
chr2	197830500	198176500	346	2q33.1	0.193	AC010746.3,AC013264.2,AC017035.2,ANKRD44,ANKRD44-IT1,ATP5G2P3,HNRNPA3P15	S1(4.6)	0
chr5	82372500	82718500	346	5q14.2	0.236	COQ10BP2,CTD-2110K23.1,TMEM167A,XRCC4	S3(3.1)	0
chr14	73028500	73374500	346	14q24.2	1.247	DPF3,RGS6,RP3-514A23.2,Y_RNA:155	S1(5.3)	0
chr2	62932500	63277191	345	2p15	2.166	AC007098.1,AC009501.4,EHBP1,RP11-443F16.1,Y_RNA:466	S2(4.1)	0
chr8	10714500	11059500	345	8p23.1	0.35	AF131215.1,AF131215.2,AF131215.3,AF131215.4,AF131215.5,AF131215.6,AF131215.9,MIR598,XKR6	S3(3.1)	0
chr2	54197500	54541500	344	2p16.2	0.231	AC008280.1,AC008280.3,ACYP2,HMGB1P31,PSME4,RNU7-172P,RP11-477N3.1,TSPYL6	S1(4.9)	0
chr12	11322500	11665656	343	12p13.2	0.097	HIGD1AP8,PRB1,PRB2,PRB3,PRB4,PRR4,RP11-144O23.20,RP11-711K1.7,RP11-711K1.8,RP11-785H5.1,RP11-785H5.2,TAS2R14,TAS2R42,TAS2R67P	S3(3.2)	0
chr8	90427300	90769955	343	8q21.3	0.285	RP11-37B2.1	S1(4.5)	0
chr18	46064500	46407500	343	18q21.1	2.558	CTIF,MIR4743,RP11-426J5.2,RP11-484L8.1	S1(5.3)	0
chr19	38392500	38734674	342	19q13.13-2	1.334	AC011465.1,CTB-102L5.7,CTB-102L5.8,CTC-244M17.1,CTC-450M9.1,DPF1,RN7SL663P,SIPA1L3,WDR87	S1(4.9)	0
chr2	189155500	189497500	342	2q32.1-2	2.472	AC079613.1,GULP1,MIR561	S2(3.9)	0
chr3	43393454	43734500	341	3p21-22	0.714	ABHD5,ANO10,RP11-353H3.1,SNRK,Y_RNA:493	S1(4.9)	0
chr15	77376326	77717500	341	15q24.3	2.086	HMG20A,PEAK1,RP11-741G21.1,RP11-94P14.1	S1(4.6)	0
chr6	12956500	13297500	341	6p24.1	0.197	PHACTR1,RNU1-11P,RP1-257A7.4,RP1-257A7.5,TBC1D7	S2(3.9)	0
chr9	80307500	80647500	340	9q21.2	1.531	GNAQ	S2(3.6)	0
chr1	227168500	227507500	339	1q42.13	1.604	ADCK3,CDC42BPA,RP11-1B20.1,RP11-211A18.1,RP11-211A18.2,RP5-1087E8.3	S2(4.2)	0
chr21	47062500	47401650	339	21q22.3	0.422	AL592528.1,PCBP3,PRED60,PRED62	S1(4.9)	0
chr8	59693500	60032500	339	8q12.1	2.536	RNU4-50P,RP11-25K19.1,RP11-328K2.1,TOX	S2(4.4)	0
chr18	57027194	57365500	338	18q21.32	4.2	CCBE1,RP11-27G24.1,RP11-27G24.3,RP11-2N1.1,RP11-2N1.2,RP11-760L24.1	S1(4.9)	0
chr4	101931500	102269500	338	4q24	1.363	AP001816.1,MIR1255A,PPP3CA	S2(3.7)	0
chr1	164527500	164864500	337	1q23.3	0.85	PBX1,RNU6-171P,RP11-477H21.2,RP11-506O24.1,RP11-506O24.2,Y_RNA:297	S2(3.5)	0
chr7	120628730	120965420	337	7q31.31	0.788	CPED1,HMGN1P18,RNA5SP241,RNU6-517P	S2(4.4)	0
chr11	128813040	129149500	336	11q24.3	0.445	ARHGAP32,RNU6-874P,RNU6-876P,Y_RNA:43	S2(3.5)	0
chr11	75524500	75859500	335	11q13.5	0.822	CTD-2011F17.2,PPP1R1AP1,RNA5SP344,RP11-263C24.1,RP11-263C24.3,RP11-535A19.2,UVRAG,Y_RNA:68,Y_RNA:69	S1(4.5)	0
chr21	27213500	27548500	335	21q21.3	1.797	AP000230.1,AP001439.2,AP001442.2,APP,RNU6-123P	S3(3.2)	0
chr17	35433500	35768500	335	17q12	1.002	ACACA,C17orf78,HMGB1P24,RP11-19G24.1,RP11-19G24.2,RP11-378E13.3,RP11-378E13.4,TADA2A	S1(4.9)	0
chr5	13678500	14012500	334	5p15.2	0.115	CTB-51A17.1,DNAH5	S1(4.9)	0
chr2	122074500	122408500	334	2q14.2-3	1.692	AC018737.1,CLASP1,RNU4ATAC,RP11-204L24.2,Y_RNA:442	S2(4.4)	0
chr1	224621500	224954601	333	1q42.12	0.125	AKR1B1P1,AL596330.1,CNIH3,RP11-100E13.1,RP11-100E13.3,RP11-3L21.2,WDR26	S1(5.3)	0
chr12	62997214	63330500	333	12q14.1-2	0.844	GAPDHP44,MIRLET7I,PPM1H,RNU1-83P,RP11-631N16.2,RPL32P26,Y_RNA:91,snoU13:48	S1(5.3)	0
chr15	56878500	57211500	333	15q21.3	0.489	RP11-1129I3.1,RP11-31H5.1,TCF12,ZNF280D	S2(4.3)	0
chr2	169311500	169644500	333	2q24.3	0.611	CERS6,CERS6-AS1,MIR4774,NOSTRIN,RNU6-766P	S3(3.3)	0
chr10	11047258	11379500	332	10p14	0.038	CELF2,CELF2-AS1,CELF2-AS2,RP1-251M9.3,RP11-397O4.1,RP3-323N1.2	S3(2.5)	0
chr6	143857981	144189500	332	6q24.2	1.223	LTV1,PHACTR2,RP11-436I24.1,RP3-468K18.5,RP3-468K18.6,ZC2HC1B	S1(4.7)	0
chr4	114351500	114683083	332	4q26	3.12	CAMK2D	S1(4.5)	0
chr13	24552500	24884500	332	13q12.12	0.473	C1QTNF9,IPO7P2,MIR2276,RP11-307N16.6,RP11-309I15.1,SPATA13,SPATA13-AS1	S1(4.9)	0
chr7	16129275	16461500	332	7p21.2	0.134	ISPD,ISPD-AS1,RPL36AP29	S3(3.3)	0
chr1	59040500	59372500	332	1p32.1	0.151	AL136985.1,JUN,MYSM1,RP11-63G10.2,RP11-63G10.3,RP4-592A1.2,RP4-794H19.1,RP4-794H19.2,TACSTD2,Y_RNA:319	S1(5.3)	0
chr8	74328500	74659500	331	8q21.11	0.378	RP11-116B19.2,RP11-181D18.4,RP11-463D19.1,RP11-463D19.2,STAU2,STAU2-AS1,VENTXP6	S1(4.6)	0
chr3	130745693	131076500	331	3q22.1	0.121	AC083908.1,AC121332.1,ASTE1,NEK11,RNU6-726P,RP11-265F19.1,RP11-933H2.4	S3(3.3)	0
chr15	44157500	44488500	331	15q15.3	0.19	ACTBP7,FRMD5,GAPDHP55,PIN4P1,WDR76	S1(5.2)	0
chr18	44789500	45119500	330	18q21.1	0.253	CTD-2130O13.1,MIR4527,RP11-157P23.2	S4(2.2)	0
chrY	16635500	16965500	330	Yq11.221	0.353	AGKP1,NLGN4Y,NLGN4Y-AS1	NULL	0
chr2	160143310	160473203	330	2q24.2	0.934	AC008277.1,AC009506.1,AC009506.2,BAZ2B,RP11-311B14.1,Y_RNA:448	S1(4.9)	0
chr20	50479451	50809500	330	20q13.2	0.34	ERP29P1,RN7SL603P,RNU6-347P,RNU7-6P,ZFP64	S2(4)	0
chr2	153190500	153519500	329	2q23.3	0.838	AC012066.1,FMNL2,PRPF40A,RP11-17G11.1	S2(4.3)	0
chr15	99186500	99515500	329	15q26.3	1.651	IGF1R,MIR4714,PGPEP1L,RP11-35O15.1,RP11-654A16.1,RP11-654A16.3	S2(3.5)	0
chr4	85561500	85889500	328	4q21.23	1.352	CDS1,RN7SL552P,RNU6-469P,WDFY3,WDFY3-AS1,WDFY3-AS2	S3(3.1)	0
chr9	129677052	130005500	328	9q33.3	0.048	ANGPTL2,GARNL3,RALGPS1,RP13-225O21.2	S1(4.9)	0
chr2	23607500	23935500	328	2p24.1	0.316	AC011239.1,KLHL29	S2(3.8)	0
chr18	67629039	67957500	328	18q22.2	0.537	RTTN,SOCS6	S2(4.3)	0
chr5	152868500	153196500	328	5q33.2	0.063	GRIA1,RN7SL177P	S2(3.8)	0
chr18	76828500	77155855	327	18q23	0.572	ATP9B,CTD-2286N8.2,RP11-1136J12.1,RP11-800A18.4	S4(2.1)	0
chr13	98790500	99117500	327	13q32.2	1.581	FARP1,FARP1-AS1,MIR3170,RN7SKP8,RNF113B,RP11-261P24.2,RP11-573N10.1,STK24	S1(4.7)	0
chr13	33924767	34251500	327	13q13.1-2	0.031	RP11-141M1.3,RP11-179A7.2,RP11-37L2.1	S1(4.7)	0
chr5	72921500	73248764	327	5q13.2	1.18	ARHGEF28,CTC-575I10.1,CTD-2372A4.1,RNU7-196P	S1(5)	0
chr3	11313994	11640500	327	3p25.3	0.967	AC026185.1,AC083855.5,ATG7,RP11-169K17.2,VGLL4	S1(4.9)	0
chr15	39886432	40213500	327	15q14-15	1.888	FSIP1,GPR176,RP11-325N19.3,RP11-37C7.1,RP11-37C7.2,RP11-37C7.3,THBS1	G1(5.5)	0
chr11	86747500	87074500	327	11q14.2	0.604	PSMA2P1,RP11-648O15.1,RP11-680L20.1,RP11-777F6.3,TMEM135	S2(4.1)	0
chr1	113931500	114257500	326	1p13.2	0.389	MAGI3,MTND5P20,PHTF1,RP11-512F24.1,RP4-730K3.3	S2(4)	0
chr1	56724243	57050500	326	1p32.2	1.283	AC119674.1,PPAP2B,RP4-710M16.2,RPL21P23	S2(3.5)	0
chr20	20368500	20694500	326	20p11.23	0.146	EIF4E2P1,RALGAPA2	S4(2.4)	0
chr17	65372500	65697500	325	17q24.2	0.371	CTD-2653B5.1,MIR548AA2,PITPNC1,RN7SL756P,Y_RNA:251,snoU13:143	S1(4.9)	0
chr15	92396500	92720500	324	15q26.1	0.464	RP11-152L20.3,RP11-24J19.1,SLCO3A1	S4(2)	0
chr1	233109500	233432500	323	1q42.2	0.701	NTPCR,PCNXL2,RP5-862P8.3,RPS7P3	S3(3.2)	0
chr2	168782500	169104500	322	2q24.3	1.565	AC016723.4,AC067940.1,STK39	S3(3.3)	0
chr5	77269500	77591500	322	5q14.1	1.317	AC024568.1,AP3B1,ATP6V1G1P6,CTD-2179L22.1	S2(4)	0
chr9	37753500	38075500	322	9p13.2	1.498	DCAF10,EXOSC3,PAICSP1,RNU7-124P,RP11-3J10.4,RP11-3J10.7,RP11-613M10.9,SHB,SLC25A51,TRMT10B	S1(4.7)	0
chr3	58718500	59040500	322	3p14.2	0.053	C3orf67,RP11-147N17.1	S3(3.4)	0
chr9	3211500	3531500	320	9p24.2	0.269	AL365202.1,RFX3,RP11-509J21.1,RP11-62E14.2	S2(3.5)	0
chr8	121505500	121825500	320	8q24.12	0.268	CTC-820M8.1,MTBP,RP11-713M15.1,RP11-713M15.2,SNTB1	S1(4.6)	0
chrX	73193500	73513500	320	Xq13.2	0.686	BMP2KL,DDX3YP1,DDX3YP2,FTX,JPX,MIR374A,MIR374B,MIR421,MIR545,MKRN5P,RAB11FIP1P1,RN7SL648P,RP13-33H18.1,RP13-36G14.3,RP13-36G14.4,RP3-368A4.5,RP3-368A4.6,RPSAP14,UHRF2P1,USMG5P1	S1(4.5)	0
chr16	47177908	47496500	319	16q12.1	0.763	ITFG1,PHKB,RNA5SP424,RP11-329J18.2,RP11-329J18.3,RP11-329J18.4,RP11-474B12.1,RPL23AP72,Y_RNA:209	S3(2.6)	0
chr20	10414500	10733737	319	20p12.2	0.276	JAG1,MKKS,RP11-103J8.1,RP5-1099D15.1,SLX4IP	S2(4)	0
chr5	119798500	120116912	318	5q23.1	1.854	PRR16,RNU4-69P,RP11-565F4.1	S2(4.1)	0
chr13	102104500	102422500	318	13q33.1	0.8	FGF14,ITGBL1,RP11-397O8.7	S2(4)	0
chrX	122317500	122635500	318	Xq25	1.123	AL356213.1,GRIA3	S2(4)	0
chr15	72095500	72411500	316	15q23	0.867	AC022872.1,CTD-2524L6.3,MYO9A,NR2E3,RNA5SP399,RNU2-65P,RP11-390D11.1,RP11-390D11.2,SENP8	S1(5.1)	0
chr3	15900500	16216155	316	3p25.1	0.102	AC090945.1,ANKRD28,MIR563	S1(5.4)	0
chr7	151818802	152133500	315	7q36.1	1.201	GALNT11,KMT2C,RP11-208G20.2,RP11-208G20.3,SEPT7P6,YBX1P4,Y_RNA:662	S3(3.1)	0
chr18	38897500	39212500	315	18q12.3	0.175	RP11-142I20.1	S4(1.8)	0
chr17	13658500	13973500	315	17p12	0.235	AC005304.1,CDRT15P1,COX10,COX10-AS1,RP11-131K5.1,RP11-131K5.2	S3(3.3)	0
chr17	27949925	28262500	313	17q11.2	0.843	EFCAB5,RNU6-920P,RP11-338L22.2,RP11-68I3.11,RP11-68I3.2,RP11-68I3.5,RP11-82O19.1,RP11-82O19.2,RPL21P123,RPL9P30,SNORA70:5,SSH2,snoU13:128	S1(5)	0
chrX	62469500	62782500	313	Xq11.1	0.415	CBX1P1,RP11-357C3.3,SPIN4,SPIN4-AS1	S3(2.5)	0
chr2	210287500	210600500	313	2q34	0.031	MAP2,RNA5SP118	S3(3.2)	0
chr10	16859527	17171830	312	10p13	0.037	CUBN	S1(5.4)	0
chr7	132457500	132768500	311	7q32-33	0.993	AC009518.8,CHCHD3,U6:10	S3(3.4)	0
chr3	127871500	128182436	311	3q21.3	0.477	DNAJB8,EEFSEC,MIR1280,RUVBL1	S1(5.1)	0
chrX	24710500	25021500	311	Xp21-22	0.29	AC004655.1,EEF1B2P3,POLA1,SCARNA23	S2(3.5)	0
chr12	104849072	105160500	311	12q23.3	0.072	CHST11,MIR3922,RP11-43D4.2	S1(5)	0
chr9	95087500	95397500	310	9q22.31	0.184	ASPN,CENPP,ECM2,IPPK,MIR4670,NOL8,OGN,OMD,RP11-19J3.5,RP11-62C3.8	S1(4.6)	0
chr20	16244500	16554500	310	20p12.1	0.227	AL118509.1,KIF16B	S4(2)	0
chr18	22623500	22933500	310	18q11.2	0.403	CTD-2006O16.2,RP11-958F21.3,ZNF521	S2(3.5)	0
chr5	81266500	81575280	309	5q14.1-2	0.275	AC114969.1,ATG10,ATG10-AS1,ATG10-IT1,PPIAP11,RN7SL378P,RPS23,RPS23P5:2	S3(3.4)	0
chr13	95646500	95954500	308	13q32.1	1.008	ABCC4,RNU6-62P,snoU13:65	S3(3.2)	0
chr9	102860500	103167500	307	9q31.1	0.412	AL353805.1,ERP44,INVS,NANOGP5,RN7SL75P,RP11-29B11.5,RPS2P35,TEX10	S2(4.4)	0
chrX	14546500	14853441	307	Xp22.2	0.087	AC003658.1,GLRA2,NPM1P9	S2(4.2)	0
chr11	100556500	100862810	306	11q22.1	0.21	AC015600.1,ARHGAP42,CTD-2383M3.1,RN7SKP115,snoU13:20	S3(2.6)	0
chr3	104321500	104627500	306	3q13.11	0.056		S3(3.2)	0
chr18	18821500	19127500	306	18q11.1-2	0.242	ESCO1,GREB1L,RP11-296E23.1,RP11-296E23.2,SNORD23:1	S1(4.7)	0
chr2	69235500	69541500	306	2p13.3	1.515	ANTXR1,MIR3126,RNA5SP96,RNU6-1216P,RP11-85D18.1	S1(5.1)	0
chr4	169552500	169858500	306	4q32.3	0.58	CBR4,PALLD,RNU6-1336P,RNU6-853P,RP11-610J23.1,RP11-635L1.3,RPL9P16	S1(5.4)	0
chr2	225606500	225912500	306	2q36.2	4.158	DOCK10,MIR4439	S1(4.6)	0
chr5	113390500	113696641	306	5q22.3	0.38	RN7SKP89,RP11-371M22.1	S2(3.8)	0
chr22	36120500	36425500	305	22q12.3	2.362	APOL5,NDUFA9P1,RBFOX2	S1(5)	0
chr8	71010500	71315500	305	8q13.3	0.864	BTF3P12,NCOA2,RP11-152C15.1,Y_RNA:715	S3(2.9)	0
chr21	26441500	26746500	305	21q21.2	0.04	7SK:3,AP000233.3,AP000233.4,AP000235.3,AP001340.1,RNA5SP489,RPL13AP7	S4(1.8)	0
chr1	94008500	94313500	305	1p22.1	3.07	BCAR3,FNBP1L,MIR760,RP11-488P3.1,RP4-561L24.3,RP5-1033H22.2	G1(5.7)	0
chr4	142253500	142557751	304	4q31.21	0.054	RP11-208N20.1,RP11-362F19.1,RP11-362F19.2,RP11-362F19.3	S2(4.1)	0
chr3	156948997	157252500	304	3q25.31-32	0.982	PTX3,RP11-550I24.2,VEPH1	S1(5.2)	0
chr1	183603500	183907500	304	1q25.3	0.572	APOBEC4,ARPC5,COLGALT2,RGL1,RP11-293B7.1,RP11-444D13.1	S1(5.1)	0
chr9	20319500	20622500	303	9p21.3	1.083	AL163193.1,MIR4473,MIR4474,MLLT3,RNU4-26P,RP11-15P13.1,RP11-73E6.2	S2(3.7)	0
chr10	131264500	131567107	303	10q26.3	0.068	AL355531.1,AL355531.2,MGMT,RP11-109A6.2	S4(1.8)	0
chr9	37119500	37422662	303	9p13.2	0.661	AL158155.1,RP11-220I1.4,RP11-397D12.4,Y_RNA:741,Y_RNA:742,ZCCHC7	S1(4.5)	0
chr14	90979500	91282500	303	14q32.11	0.589	AL096869.1,CTD-3035D6.1,RP11-1078H9.2,RP11-1078H9.5,RP11-661G16.1,RP11-661G16.2,TTC7B	S2(3.5)	0
chr2	39663500	39966500	303	2p22.1	0.203	AC007246.3,MAP4K3,THUMPD2,TMEM178A	S1(5.1)	0
chr1	197448500	197751500	303	1q31.3	1.061	DENND1B,EEF1A1P32,FAM204BP,RP11-448G4.2,RP11-448G4.4,Y_RNA:344	S2(4.1)	0
chr19	13315500	13618500	303	19p13.2	0.281	AC005513.1,CACNA1A	S1(4.8)	0
chr6	157801500	158103500	302	6q25.3	0.22	MIR3692,RP11-193H22.2,ZDHHC14	S1(4.7)	0
chr2	159824500	160126500	302	2q24.2	1.103	BTF3L4P2,GSTM3P2,RNU6-580P,TANC1,WDSUB1	S1(4.9)	0
chr22	40440500	40742506	302	22q13.1	0.981	RP3-496C20.1,RP6-11O7.2,TNRC6B	S1(4.6)	0
chr13	77601330	77902500	301	13q22.3	1.14	MYCBP2,MYCBP2-AS1,MYCBP2-AS2	S2(3.5)	0
chr6	15244500	15545500	301	6p22.3	1.905	DTNBP1,JARID2,JARID2-AS1,RNU6-522P,RNU6-645P,RP11-560J1.2	S3(2.9)	0
chr9	85852500	86153461	301	9q21.32	0.265	FRMD3,RNU4-29P,RP11-439K3.3,SNORD112:47,snoU13:441	S3(2.6)	0
chr1	85742773	86043933	301	1p22.3	6.698	AL590113.1,DDAH1,RP11-131L23.1,RP11-131L23.2,Y_RNA:365	G1(5.6)	0
chr5	138234500	138535500	301	5q31.2	0.482	CTB-46B19.1,CTB-46B19.2,CTNNA1,RNA5SP194,SIL1	S1(4.7)	0
chr6	1095500	1395500	300	6p25.3	0.055	AL033381.1,FOXF2,FOXQ1,RP4-668J24.2,snoU13:362	S2(4.2)	0
chr15	49614500	49914500	300	15q21.2	0.051	DTWD1,FAM227B,FGF7,GALK2,RP11-295H24.3	S1(4.6)	0
chr5	42422500	42722500	300	5p12-13	0.04	CTD-2265D6.2,GHR,SERBP1P6	S4(2.3)	0
chr3	27110500	27410951	300	3p24.1	1.391	AC099535.1,MINOS1P3,NEK10,RNU6-342P	S2(4.2)	0
chr3	123304032	123603178	299	3q21.1	6.228	MYLK,MYLK-AS1,MYLK-AS2,RP11-9N20.3,SNORA5	S1(5.3)	0
chr13	99440500	99739500	299	13q32.3	0.503	DOCK9,DOCK9-AS1,RNU6-83P,RPL7L1P12	S1(4.7)	0
chr16	47494500	47793500	299	16q12.1	0.657	EIF4BP5,ITFG1,NDUFA5P11,PHKB,RNA5SP425,RP11-177N22.2,RP11-177N22.3,RP11-523L20.2	S3(3.1)	0
chr4	118816500	119115906	299	4q26	0.105	FKBP4P1,NDST3	S3(2.9)	0
chr4	4542500	4841500	299	4p16.2	0.125	STX18,STX18-AS1	S1(4.9)	0
chr1	92952433	93251500	299	1p22.1	0.789	CCNJP2,EVI5,HMGB3P9,RNU4-59P,RP11-330C7.3,RP11-330C7.4,RP4-593M8.1	S1(4.5)	0
chr2	25598714	25897500	299	2p23.3	0.134	AC104699.1,DTNB	S1(4.8)	0
chr1	12289500	12587765	298	1p36.22	0.787	SNORA59A,VPS13D	S1(4.9)	0
chr7	115848500	116145500	297	7q31.2	0.577	AC002066.1,AC002066.2,AC073130.1,AC073130.3,CAV2,TES,snoZ185	G1(5.6)	0
chr6	82165500	82462500	297	6q14.1	0.304	AL359693.1,FAM46A,RNA5SP210,RP1-300G12.2,RP5-991C6.4	S2(4)	0
chr3	4572500	4869500	297	3p26.1	0.024	AC018816.3,EGOT,ITPR1	S3(3.2)	0
chr3	151981500	152278500	297	3q25.1-2	6.056	MBNL1,MBNL1-AS1,RP11-362A9.3,TMEM14E,Y_RNA:481	S1(4.5)	0
chr17	29421500	29718952	297	17q11.2	1.537	AK4P1,CTD-2370N5.3,EVI2A,EVI2B,NF1,OMG,RAB11FIP4,RP11-142O6.1,RP11-848P1.5	S1(5.2)	0
chr1	210073500	210370500	297	1q32.2	1.016	SYT14	S1(5.1)	0
chr11	35964500	36261500	297	11p13	0.2	LDLRAD3,MIR3973,RP5-916O11.1,RP5-916O11.2,RP5-916O11.3	S1(4.7)	0
chr6	151177500	151474500	297	6q25.1	1.774	AL133260.1,MTHFD1L,RNU6-302P,RP1-292B18.1,RP1-292B18.3,RP1-292B18.4,RP1-99E18.2	S1(4.6)	0
chr16	72795500	73092500	297	16q22.2-3	2.375	AC002044.4,AC004943.1,AC132068.1,RNU7-71P,RP5-991G20.1,RP5-991G20.2,RP5-991G20.4,ZFHX3	S2(3.7)	0
chr2	61401500	61697904	296	2p15	1.481	AC016894.1,AHSA2,RP11-479F13.1,RP11-493E12.2,SNORA70B,USP34	S1(4.7)	0
chr4	160023500	160319684	296	4q32.1	1.326	AC095064.1,AC105316.1,MIR3688-2,RAPGEF2,RP11-138A23.1	S1(4.6)	0
chr11	12695500	12991500	296	11p15.2-3	3.871	AC084859.1,LINC00958,RP11-47J17.1,RP11-47J17.2,RP11-47J17.3,SCARNA16:1,TEAD1	S1(5)	0
chr3	107243500	107538500	295	3q13.12	0.828	BBX	S2(3.5)	0
chrX	11151500	11446500	295	Xp22.2	0.074	AC002366.3,AMELX,ARHGAP6,MIR548AX	S2(3.9)	0
chr4	106943635	107238500	295	4q24	0.566	AIMP1,TBCK	S3(3.2)	0
chr4	48488500	48783500	295	4p11	1.385	FRYL,RNU5E-3P,SLC10A4,ZAR1	S2(4.4)	0
chr8	126103500	126398500	295	8q24.13	0.966	KIAA0196,NSMCE2,RN7SL329P,RP11-550A5.2	S1(4.6)	0
chr2	182997500	183292500	295	2q31-32	0.063	PDE1A,RN7SL267P	S2(3.8)	0
chr10	63656500	63951500	295	10q21.2	4.278	AC067742.1,AL671972.1,ARID5B,RTKN2	S1(5.3)	0
chr15	36870500	37164500	294	15q14	0.769	C15orf41,CSNK1A1P1,LARP4P,RP11-16L14.2,RP11-618N24.1,TPST2P1,U3:15	S1(4.5)	0
chr11	108534500	108828444	294	11q22.3	0.663	CYCSP29,DDX10,RP11-801G16.2,RPS2P39	S2(4.2)	0
chr7	105223703	105517500	294	7q22.3	0.671	ATXN7L1,CDHR3,CTA-351J1.1,EFCAB10	S1(5)	0
chr14	35985500	36278510	293	14q13.2	0.534	AL162311.1,INSM2,QRSL1P3,RALGAPA1,SNORA31:6,snoU13:79	S2(4.3)	0
chr1	103282500	103575500	293	1p21.1	4.929	COL11A1,RP5-936J12.1,SOD2P1	S2(3.7)	0
chr10	29733500	30026500	293	10p11.23	0.424	MIR604,MIR938,PTCHD3P1,RNU6-908P,RP11-192N10.2,SNORD115:1,SVIL	S1(4.8)	0
chr1	45477001	45769500	292	1p34.1	0.039	AL359473.1,AL592294.1,OSTCP5,UROD,ZSWIM5	S1(4.7)	0
chr1	77746500	78038500	292	1p31.1	0.481	AC095030.1,AK5,RNU7-8P,RP11-375A5.1,ZZZ3	S1(5.2)	0
chr6	121364500	121656500	292	6q22.31	0.194	TBC1D32	S4(2.2)	0
chr8	116390500	116682500	292	8q23.3	1.304	AF178030.2,TRPS1	S3(3.2)	0
chr5	79949500	80240500	291	5q14.1	0.669	DHFR,MSH3,RP11-241J12.1,RP11-241J12.3	S2(4.1)	0
chr10	120937500	121228500	291	10q26.11	0.569	GRK5,MIR4681,PRDX3,RN7SL749P,RP11-567J24.4,RP11-79M19.2	G1(5.5)	0
chr15	59376500	59666500	290	15q22.2	1.365	AC092756.1,AC092757.1,C15ORF31,CCNB2,FAM81A,LDHAL6B,MIR2116,MYO1E,RNF111,RNU4-80P,RNU6-212P,RP11-356M20.3,RP11-429D19.1,RP11-59H7.3	S1(4.6)	0
chr5	143585500	143875500	290	5q31.3	0.088	CKS1BP5,CTC-218H9.1,KCTD16	S2(3.7)	0
chr21	28927500	29217500	290	21q21.3	0.021	AP001607.1,LINC00113	S2(3.6)	0
chr3	8254500	8544500	290	3p26.1	0.042	AC023481.1,LMCD1,LMCD1-AS1,RNU4ATAC17P	S2(4.3)	0
chr7	116593500	116883500	290	7q31.2	0.961	AC002542.2,AC106873.4,ST7,ST7-AS1,ST7-AS2,ST7-OT4,TPM3P1	S1(4.7)	0
chr21	36132500	36422500	290	21q22.12	3.852	AP000330.8,RUNX1	S1(5.1)	0
chr7	32766500	33056500	290	7p14.3	0.155	AC083863.5,AVL9,DPY19L1P1,DPY19L1P2,FKBP9,KBTBD2,MIR550A2,NT5C3A,RNU6-388P,RP11-225B17.1,RP11-225B17.2,RP11-265E18.1,RP9P,SNORA31:19,ZNRF2P1	S1(5.1)	0
chr6	21872500	22162500	290	6p22.3	0.025	CASC14,CASC15,RN7SKP240	S3(3)	0
chr4	147155500	147444500	289	4q31.22	0.552	RP11-6L6.7,SLC10A7	S3(2.8)	0
chr5	110558500	110847923	289	5q22.1	0.247	AC010468.2,CAMK4,CTC-499J9.1,STARD4	S3(3.1)	0
chr4	139810500	140098500	288	4q31.1	0.497	AC093602.1,CCRN4L,ELF2,PPP1R14BP3,RN7SL382P,RNU6-531P,RP11-371F15.3,RP11-577B7.1	S1(4.7)	0
chr4	2469500	2757500	288	4p16.3	1.377	FAM193A,RNF4,RP11-503N18.5,TNIP2,WI2-89927D4.1,Y_RNA:556	S1(5.4)	0
chr5	16653500	16941500	288	5p15.1	3.043	CTB-55B8.1,MYO10,RNA5SP179	S1(4.7)	0
chr4	120986500	121274500	288	4q27	0.065	LTV1P1,MAD2L1,RP11-679C8.2,SAR1P3	S3(2.6)	0
chr7	41989500	42277500	288	7p14.1	1.253	GLI3,HMGN2P30	S2(4)	0
chr11	28373653	28661500	288	11p14.1	0.166	RP11-22P4.1,RP11-22P4.2	S2(4.2)	0
chr8	108223500	108511500	288	8q23.1	0.401	ANGPT1,AP000428.1	S2(4.2)	0
chrX	76755500	77042500	287	Xq21.1	0.909	ATRX,FABP5P15	S2(3.7)	0
chr2	24713500	25000500	287	2p23.3	0.583	NCOA1,RNA5SP88,RNU6-936P	S2(4.4)	0
chr6	148593439	148879500	286	6q24.3	1.988	AL033378.1,CYP51P3,RNU6-1222P,RP11-631F7.1,SASH1	S1(4.9)	0
chr13	96420500	96706500	286	13q32.1	0.594	DNAJC3,HMGN1P24,UGGT2	S3(3.3)	0
chr11	33277500	33563617	286	11p13	1.98	AL122015.1,HIPK3,RP1-130L23.1,RP1-305G21.1	S1(5.4)	0
chr16	53087500	53373500	286	16q12.2	1.551	CHD9,RNA5SP427,RP11-295M3.2,RP11-454F8.2,Y_RNA:212,snoU13:105	S3(2.9)	0
chr3	126422500	126707436	285	3q21.3	0.346	CHCHD6,RCC2P4	S2(3.8)	0
chr7	104745930	105030500	285	7q22.3	1.444	CTB-152G17.4,CTB-152G17.5,KMT2E,RNU6-1322P,RP4-778K6.1,RP4-778K6.3,RWDD4P1,SRPK2	S1(5.1)	0
chr10	105330500	105615301	285	10q24.33	1.516	NEURL,RP11-416N2.4,SH3PXD2A,Y_RNA:2	S1(5.4)	0
chr11	31530500	31814500	284	11p13	0.262	AC131571.1,AC131571.2,ELP4,IMMP1L,PAX6,Z83001.1,Z83307.3	S3(2.9)	0
chr1	219341500	219625500	284	1q41	0.224	LYPLAL1,RIMKLBP2,RP11-135J2.3,RP11-135J2.4,RP11-392O17.1,RP11-95P13.1	S2(3.5)	0
chr6	143380500	143663382	283	6q24.2	0.522	AIG1,RP1-45I4.2,RP1-95L4.2,RP1-95L4.3	S1(4.5)	0
chr6	138732500	139015500	283	6q23-24	0.345	HEBP2,MIR3145,NHSL1,RP11-390P2.2,RP11-390P2.4	S2(3.5)	0
chr4	141772500	142055500	283	4q31.21	1.758	RNF150	S2(3.9)	0
chr12	32258500	32541500	283	12p11.21	0.827	BICD1,RP11-843B15.2,RP11-956A19.1	S2(4.4)	0
chr8	110064500	110347500	283	8q23.1	0.512	ENY2,NUDCD1,RP11-1084E5.1,RP11-122A21.2,TRHR	S4(1.8)	0
chr2	186664878	186947960	283	2q32.1	0.118	AC097500.2,FSIP2,RPL21P32	S4(2.3)	0
chrX	129756500	130038500	282	Xq26.1	0.294	ENOX2,RP5-875H3.2	S3(3.3)	0
chr9	127624260	127905785	282	9q33.3	0.328	AL354928.1,ARPC5L,GOLGA1,RNU4-82P,RP11-474P12.3,SCAI	S1(5.4)	0
chr2	229855500	230137500	282	2q36.3	0.171	AC007677.2,PID1,RN7SKP283	S3(3.4)	0
chr17	13225500	13506500	281	17p12	0.651	AC005375.1,HS3ST3A1,MIR548H3	S2(4.1)	0
chr9	128189500	128470500	281	9q33.3	1.767	HNRNPA1P15,MAPKAP1,RN7SL30P,RP11-12A16.3	S1(5.2)	0
chr6	79035500	79316500	281	6q14.1	0.113	RP3-390M24.1	S3(2.6)	0
chr10	22012500	22293500	281	10p12.31	0.374	AL359697.1,DNAJC1,MLLT10,RN7SKP219,RN7SKP37	S3(3.3)	0
chr3	119533500	119814500	281	3q13.33	2.327	GSK3B,NR1I2,RP11-18H7.1,RP11-767L7.1,RP11-767L7.2	S1(5.1)	0
chr1	225116500	225396500	280	1q42.12	0.071	DNAH14	S2(3.5)	0
chr2	62115500	62395996	280	2p15	0.467	AC018462.2,AC018462.3,CCT4,COMMD1	S2(4.1)	0
chr5	21339500	21619500	280	5p14.3	0.13	AC138951.1,GUSBP1,RP11-360I2.1,RP11-374A4.1,RP11-804N13.1,RP11-823P9.3	G2(1.3)	0
chr11	102701500	102980159	279	11q22.2-3	0.133	DCUN1D5,MMP12,MMP13,MMP3,RNU7-159P,RP11-690D19.1,RP11-690D19.3,RP11-725K16.2,WTAPP1	S1(5.3)	0
chr5	102089500	102368079	279	5q21.1	2.307	PAM	S2(4.4)	0
chr3	33482863	33760500	278	3p22.3	0.516	AC132515.1,CLASP2,RNA5SP128	S1(4.9)	0
chr12	88701500	88979500	278	12q21.32	1.577	KITLG,RNU1-117P,Y_RNA:96	S1(5.3)	0
chr18	60381500	60659500	278	18q21.33	0.351	AC015989.1,AC015989.2,PHLPP1,RNU6-142P	S2(3.6)	0
chr2	30669500	30947500	278	2p23.1	0.654	CAPN13,LCLAT1	S2(3.5)	0
chr9	5352410	5630500	278	9p24.1	0.206	CD274,KIAA1432,PDCD1LG2,PLGRKT,RP11-12D24.6,RP11-12D24.7,RP11-574F11.3	S1(5.3)	0
chr1	213223500	213500500	277	1q32.3	0.679	RPS6KC1	S3(3)	0
chr15	67835046	68112041	277	15q23	0.433	HNRNPA1P5,MAP2K5	S1(4.9)	0
chr13	100257500	100533500	276	13q32.3	0.059	CLYBL,CLYBL-AS1,CLYBL-AS2,MIR4306,SNORA25:4,snoU13:68	S2(3.5)	0
chr8	32795500	33071500	276	8p12	0.031	AC104037.1,MTND1P6,MTND2P32,RANP9,RP11-11N9.4	S1(4.7)	0
chr7	72023500	72299500	276	7q11.22-23	0.094	AC091738.2,MIR4650-2,RN7SL377P,RP11-1394O16.1,RP11-535E8.2,TYW1B	S2(3.6)	0
chr2	170683967	170959500	276	2q31.1	1.001	AC092641.2,UBR3	S2(3.5)	0
chr3	9021500	9297500	276	3p25.3	0.024	SRGAP3,SRGAP3-AS1,SRGAP3-AS2,SRGAP3-AS3	S2(4.3)	0
chrX	9432500	9708500	276	Xp22.2-31	1.022	GPR143,TBL1X	S2(3.9)	0
chr4	26584500	26859299	275	4p15.2	0.435	AC093807.1,SNORD74:6,TBC1D19	S1(4.6)	0
chr9	124581731	124856500	275	9q33.2	0.33	TTLL11,TTLL11-IT1	S1(5.2)	0
chr18	21268500	21543500	275	18q11.2	0.045	AC010754.1,LAMA3,RP11-403A21.1,RPL23AP77	S1(5.3)	0
chr6	169827164	170102159	275	6q27	0.249	AL513547.1,WDR27	S2(3.8)	0
chr1	180600500	180875786	275	1q25.3	0.676	AL590085.1,U6:7,XPR1	S1(4.5)	0
chr6	19361500	19636500	275	6p22.3	0.021	KRT18P38,RNA5SP205,RP1-167F1.2	S4(2.2)	0
chr13	73355500	73629113	274	13q22.1	0.565	AL391384.1,DIS3,PIBF1,PSMD10P3,RNU6-79P	S2(3.6)	0.063	1		1
chr6	46185500	46459500	274	6p12-21	0.211	RCAN2,RP11-795J1.2	S3(2.9)	0
chr1	243417500	243691500	274	1q43	0.55	AKT3,CEP170,FCF1P7,MIR4677,SDCCAG8	S3(3.4)	0
chr17	70316500	70589500	273	17q24.3	0.639	LINC00511,RP11-1124B17.1,RP11-57A1.1	S1(4.9)	0
chr2	112370500	112643500	273	2q13	0.045	AC093166.1,AC093166.2,AC093166.3,AC093166.4,ANAPC1,MIR4771-1	S1(5.1)	0
chr2	180301500	180574500	273	2q31.2	0.022	ZNF385B	S3(3)	0
chr13	38172981	38445500	273	13q13.3	1.466	RNA5SP26,TRPC4	S2(3.6)	0
chr15	48665500	48938046	273	15q21.1	4.317	FBN1	G1(5.6)	0
chr10	74114988	74386500	272	10q22.1	0.601	AL513185.1,MICU1,Metazoa_SRP:1,RNU6-805P,RP11-167P22.3,RP11-167P22.4	S1(5.2)	0
chr5	80255500	80526500	271	5q14.1	0.102	CKMT2-AS1,CTC-459I6.1,CTD-2193P3.1,CTD-2193P3.2,RASGRF2	S2(4.3)	0
chr2	32582095	32853098	271	2p22.3	1.856	BIRC6,BIRC6-AS1,MIR558	S1(4.5)	0
chr6	47809500	48080500	271	6p12.3	0.506	PTCHD4	S4(2.3)	0
chr3	129343500	129613500	270	3q22.1	0.75	AC083799.1,RNU6-1142P,RP11-263I1.1,TMCC1,TMCC1-AS1,Y_RNA:480	S1(5.1)	0
chr6	45389500	45659500	270	6p21.1	1.655	RNU6-515P,RP1-166H4.2,RP1-244F24.1,RUNX2	S1(5.1)	0
chr7	102446500	102715286	269	7q22.1	0.029	AC073127.1,FAM185A,FBXL13,LRRC17,NFE4,RN7SKP198,RNU6-1136P,RP11-645N11.3	S1(5)	0
chr5	135801500	136070615	269	5q31.1	0.127	RP11-114H21.2	S3(2.9)	0
chr3	196756687	197025500	269	3q29	2.01	DLG1,DLG1-AS1,MIR4797	S1(5)	0
chr15	49446500	49715292	269	15q21.1-2	0.631	COPS2,FAM227B,GALK2,MIR4716,NDUFAF4P1,RN7SL307P,RP11-295H24.3,RP11-325E5.4	S1(4.8)	0
chr16	81478500	81747500	269	16q23.2-3	1.501	CMIP,RP11-391L3.5	S1(5)	0
chr15	33010174	33279500	269	15q13.3	6.04	FMN1,GREM1,RP11-758N13.1,RP11-758N13.3,SNORD77:1,snoU13:85	S1(5.4)	0
chr18	25489500	25758500	269	18q12.1	4.337	AC015933.2,CDH2	S3(3.1)	0
chr12	94070500	94338816	268	12q22	0.43	CRADD,RN7SL630P,RP11-1060G2.1,RP11-887P2.5,RP11-887P2.6	S1(5.2)	0
chr6	111927481	112195500	268	6q21	0.622	FYN,snoU13:375	S1(5.3)	0
chr1	215177500	215445500	268	1q41	0.455	KCNK2	S1(4.6)	0
chr9	114392500	114659045	267	9q31.3	0.292	C9orf84,DNAJC25,DNAJC25-GNG10,GNG10,LRRC37A5P,RNU6-1013P,RP11-430K21.2	S1(5.2)	0
chr13	32605436	32872290	267	13q13.1	0.984	FRY,FRY-AS1	S1(4.7)	0
chr4	74965010	75232500	267	4q13.3	0.281	AC093677.1,AC097470.1,EPGN,EREG,MTHFD2L	S1(4.8)	0
chr21	35445500	35711500	266	21q22.11	0.43	AP000318.1,AP000318.2,AP000320.7,LINC00310,MRPS6,RPS5P2,SLC5A3	S1(4.6)	0
chr15	50144500	50410500	266	15q21.2	0.023	ATP8B4,CTD-2647E9.3,RNA5SP394	S2(4.4)	0
chr2	45573500	45839500	266	2p21	0.448	RN7SL414P,SRBD1	S1(4.8)	0
chrX	71527037	71793500	266	Xq13.1	0.365	HDAC8,RNU2-68P	S1(4.6)	0
chr2	121492500	121758500	266	2q14.2	1.431	GLI2,RP11-297J22.1	S1(5)	0
chr8	135460500	135726500	266	8q24.22	0.43	CTD-2342N23.2,ZFAT,ZFAT-AS1	S3(3.1)	0
chr2	98352500	98617500	265	2q11.2	1.297	HMGN1P36,RNU7-96P,TMEM131,ZAP70	S2(3.5)	0
chr7	79758500	80023500	265	7q21.11	1.382	AC003988.1,AC004862.6,CD36,GNAI1,RN7SL35P,RN7SL869P,SNRPBP1	S1(4.9)	0
chr9	115249126	115513117	264	9q32	0.35	C9orf147,INIP,KIAA1958,RP11-276E15.4,RP11-576C12.1	S1(4.8)	0
chr11	103772500	104036500	264	11q22.3	0.055	DDI1,PDGFD,RP11-617B3.2	S3(3.1)	0
chr8	25036500	25300500	264	8p21.2	3.781	DOCK5,GNRH1,KCTD9,RN7SL651P,RP11-395I14.2	S1(4.7)	0
chrX	131351500	131615500	264	Xq26.2	0.159	MBNL3,RAP2C,RAP2C-AS1	S4(2)	0
chr12	19281500	19545500	264	12p12.3	0.693	PLEKHA5,RN7SL459P,RN7SL67P,RP11-282K24.3	S2(3.6)	0
chr16	11037500	11301500	264	16p13.13	0.59	AC007014.1,CLEC16A,RP11-396B14.2,RP11-66H6.3	S1(5.2)	0
chr8	106809500	107073500	264	8q23.1	0.026	RP11-152P17.2,RP11-152P17.3,Y_RNA:721,ZFPM2	S3(3.2)	0
chr16	68876500	69139466	263	16q22.1	0.462	RNU6-898P,RP11-123C5.5,RP11-521L9.1,RP11-521L9.2,RPS2P45,TANGO6,Y_RNA:216	S1(5)	0
chr7	33944500	34207500	263	7p14.3	0.23	BMPER	S1(5.1)	0
chr8	15396500	15658500	262	8p22	0.589	RP11-235P11.1,TUSC3	S4(1.9)	0
chr5	178510195	178772500	262	5q35.3	1.966	ADAMTS2,ZNF354C	S2(3.5)	0
chr10	16597500	16859527	262	10p13	1.277	RP11-197M22.2,RSU1	S2(4.1)	0
chr2	190044605	190306500	262	2q32.2	0.051	AC118063.1,KRT18P19,WDR75	G1(5.5)	0
chr1	169076500	169338500	262	1q24.2	0.299	ATP1B1,BLZF1,NME7,RP4-800F24.1	S3(2.5)	0
chr16	52783500	53045198	262	16q12.2	0.113	RP11-467J12.1,RP11-467J12.2,RP11-467J12.3	S4(2.4)	0
chr4	170272500	170534500	262	4q33	0.298	CLCN3,NEK1	S1(5.1)	0
chr3	156893011	157154577	262	3q25.31-32	0.049	RP11-550I24.2,RP11-550I24.3,VEPH1	S1(5.4)	0
chr9	35160500	35421500	261	9p13.3	0.271	AL160274.1,ATP8B5P,UNC13B	S1(4.8)	0
chr18	21717500	21978500	261	18q11.2	0.567	CABYR,MIR320C2,OSBPL1A,RN7SL247P,RNA5SP452,RNU6-435P,RP11-621L6.2,RP11-799B12.4	S2(4.3)	0
chr4	37892707	38153500	261	4p14	0.897	AC021106.1,MRPS33P2,PTTG2,RP11-177C12.4,TBC1D1	S1(4.6)	0
chr11	116708666	116969500	261	11q23.3	0.758	AP000936.1,AP000936.2,AP006216.12,RNY4P6,SIK3,SIK3-IT1	S1(5.2)	0
chr10	93791500	94051500	260	10q23.32	0.197	AL158040.1,CPEB3,CPEB3_ribozyme,EIF4A1P8,MARCH5,NHP2P1,SDHCP2,SNORA25:1,Y_RNA:36	S1(4.7)	0
chr13	33664500	33924767	260	13q13.1	2.728	AL138999.1,RP11-141M1.1,STARD13,STARD13-AS,STARD13-IT1	S1(4.5)	0
chr21	33681048	33941500	260	21q22.11	0.469	C21orf119,EVA1C,EXOSC3P1,MRAP,RN7SL109P,RNA5SP490,SNORA33:1,SNORA80,URB1	S1(5)	0
chr7	65670185	65930500	260	7q11.21	0.64	GS1-124K5.2,GS1-124K5.6,LINC00174,RNU6-313P,RNU6-96P,RP11-792A8.1,SKP1P1,TPST1,snoU13:395	S1(5.2)	0
chr2	73612500	73872500	260	2p13.1	0.383	AC096546.1,ALMS1,ALMS1-IT1,ALMS1P,NAT8	S2(4)	0
chr15	73344500	73603500	259	15q24.1	0.088	FKBP1AP2,NEO1,NPM1P43,RP11-272D12.2	S3(2.8)	0
chr21	38104500	38363500	259	21q22.13	0.614	AP000704.5,DPRXP5,HLCS,HLCS-IT1,RNA5SP491,SIM2,Y_RNA:397	S2(4.2)	0
chr6	131126500	131385500	259	6q23.1-2	0.788	EPB41L2,SMLR1	S1(4.8)	0
chr4	152329500	152588375	259	4q31.3	0.332	AC097455.1,FAM160A1,RN7SKP35,RP11-610P16.1	S2(4.2)	0
chr12	11802500	12061500	259	12p13.2	1.806	ETV6	S2(4.1)	0
chr10	80827500	81086500	259	10q22.3	4.437	ZMIZ1,ZMIZ1-AS1	S1(5.2)	0
chr22	44318500	44577500	259	22q13.31	0.626	PARVB,PARVG,PNPLA3,RP4-796I17.5,SAMM50	S2(3.8)	0
chr1	184355500	184614500	259	1q25.3	0.357	C1orf21,GS1-115G20.1,GS1-115G20.2,RP11-382D12.2	S1(4.5)	0
chr10	35624500	35883500	259	10p11.21	1.291	CCNY,RP11-324I22.4	S2(4.1)	0
chr11	86125500	86384500	259	11q14.2	0.274	CCDC81,ME3,PTP4A1P6,RP11-317J19.1	G1(5.5)	0
chr17	1948262	2207065	259	17p13.3	1.356	AC090617.1,AC130689.5,AL450226.2,HIC1,MIR132,MIR212,RN7SL624P,RP11-667K14.5,RP11-667K14.8,SMG6,SRR	S1(5.4)	0
chr3	23986500	24244500	258	3p24.2	0.445	LINC00691,NKIRAS1,NPM1P23,NR1D2,THRB	S1(4.9)	0
chr1	198057500	198315500	258	1q31.3	3.894	NEK7,RP11-401A10.2	S1(4.9)	0
chr7	66461500	66719500	258	7q11.21	0.165	AC073089.1,MIR4650-1,RP11-324F21.1,TYW1	S1(4.9)	0
chr9	79791500	80049500	258	9q21.2	0.415	GNA14,VPS13A,VPS13A-AS1	S2(3.6)	0
chr15	96627500	96885500	258	15q26.2	0.23	AC016251.1,MIR1469,NR2F2,NR2F2-AS1,RP11-327J17.1,RP11-327J17.2	S2(3.8)	0
chr1	62897500	63155500	258	1p31.3	1.122	AL138847.1,ANGPTL3,DOCK7,RP11-230B22.1,RP11-293K19.1,RP5-849H19.2,USP1	S2(4)	0
chr9	127277500	127534500	257	9q33.3	0.061	MIR181A2,MIR181A2HG,MIR181B2,NR6A1,RN7SL302P,RP11-10J18.3,RP11-164H5.1,RP11-175D17.3	G1(5.5)	0
chr9	118915500	119172500	257	9q33.1	1.076	AL137024.1,AL353141.1,PAPPA,PAPPA-AS1,PAPPA-AS2,RP11-45A16.4	S1(4.5)	0
chr1	202316500	202573395	257	1q32.1	0.251	PPP1R12B,RP11-175B9.2,RP11-175B9.3,RP11-396D18.1,SNORA70:12,SYT2,U6:8	S1(4.6)	0
chr3	184528500	184785500	257	3q27.2	0.626	VPS8	S2(4.3)	0
chr22	40776500	41033500	257	22q13.1-2	1.836	ADSL,AL031594.1,COX6B1P3,MKL1,RP4-591N18.2,RP5-1042K10.10,RP5-1042K10.12,RP5-1042K10.13,RPL4P6,SGSM3	S1(5.1)	0
chr6	17736500	17992500	256	6p22.3	2.474	AL023807.1,KIF13A,RP3-525L6.2,Y_RNA:639	S1(5.1)	0
chrX	44731500	44987500	256	Xp11.3	0.86	KDM6A,RNU6-523P	S2(3.6)	0
chr8	2583500	2839500	256	8p23.2	0.204	CSMD1,GS1-57L11.1,RP11-134O21.1	G2(1.4)	0
chr5	129238500	129493500	255	5q23.3	0.02	CHSY3,CTC-575N7.1,HSPA8P4,RNA5SP191,RNU6ATAC10P	S4(1.8)	0
chr6	118776155	119031500	255	6q22.31	1.188	BRD7P3,CEP85L,PLN,SSXP10	S2(4)	0
chr14	25266500	25520500	254	14q12	0.14	STXBP6	S3(3.4)	0
chr1	29212500	29466500	254	1p35.3	0.074	EPB41,RP4-604A21.1,TMEM200B,Y_RNA:314	S1(5.1)	0
chr4	184019500	184273500	254	4q35.1	1.905	CLDN22,CLDN24,RNU7-158P,U3:53,WWC2,WWC2-AS1,WWC2-AS2,snoU13:314,snoU13:323	S1(4.9)	0
chr2	120516500	120770580	254	2q14.2	0.354	AC016691.2,PTPN4,snoU13:233	S2(4.1)	0
chr4	119755500	120009500	254	4q26	0.293	RP11-21I10.2,RP11-358D17.1,SEC24D,SYNPO2	S1(5.4)	0
chr7	38418500	38671500	253	7p14.1	0.12	AMPH,RN7SL83P	S3(2.5)	0
chrX	138763500	139016500	253	Xq27.1	0.723	ATP11C,MCF2,MIR505,RNU6ATAC23P,SNORA18:8,snoU13:460	S4(2.3)	0
chr9	136605046	136857726	253	9q34.2	0.876	AL590710.1,SARDH,VAV2	S2(3.9)	0
chr9	72034500	72287500	253	9q21.11-12	0.403	APBA1,RP11-470P21.2,RP11-548B3.3	S1(4.6)	0
chr19	4969124	5222500	253	19p13.3	0.663	CTC-482H14.5,KDM4B,PTPRS	S1(5.3)	0
chr3	159950500	160203561	253	3q25.33	0.509	IFT80,MIR15B,MIR16-2,RNU7-136P,RP11-227J5.3,RP11-432B6.1,RP11-432B6.3,SMC4,TRIM59	S1(5.1)	0
chr5	64063500	64315864	252	5q12.3	0.534	CWC27,SREK1IP1	S1(5.2)	0
chr2	23899500	24151500	252	2p23-24	0.758	AC066692.3,ATAD2B,KLHL29,PGAM1P6,UBXN2A	S1(4.7)	0
chr9	140513443	140765500	252	9q34.3	1.145	EHMT1,MIR602,RP11-188C12.2,RP11-188C12.3,SETP5	S1(4.5)	0
chr12	50898767	51150674	252	12q13.12	0.908	DIP2B,RNU6-238P,RNU6-769P,Y_RNA:89	S1(5.1)	0
chr22	18257536	18508500	251	22q11.21	1.256	LINC00528,MICAL3,MIR648,RHEBP3,XXbac-B461K10.4,XXbac-B476C20.13,XXbac-B476C20.14	S1(5.1)	0
chr3	73424500	73675500	251	3p13	1.506	PDZRN3,PDZRN3-AS1,RNU7-119P	S2(4.2)	0
chr12	102927500	103178500	251	12q23.2	0.022		S2(3.7)	0
chr6	74362500	74612500	250	6q13	0.825	CD109,RP11-553A21.3,SLC17A5	S1(5.1)	0
chr6	80815500	81065140	250	6q14.1	0.542	BCKDHB	S3(3.2)	0
chr12	115206478	115456500	250	12q24.21	0.048	RP4-601P9.1	S1(4.9)	0
chr15	94774500	95024039	250	15q26.2	0.046	MCTP2,RP11-354B3.1	S4(2.2)	0
chr2	218626014	218876500	250	2q35	1.283	AC009469.1,AC010136.2,TNS1	S1(4.8)	0
chr12	124803500	125052500	249	12q24.31	1.695	NCOR2,RP11-408I18.9,RP11-83B20.1	S1(4.5)	0
chr10	134350500	134599500	249	10q26.3	0.97	INPP5A,NKX6-2,RP11-288G11.3	S1(4.6)	0
chr9	102334500	102583500	249	9q22.33	0.09	RP11-554F20.1	S2(4.2)	0
chr6	105060500	105309500	249	6q16.3	0.306	HACE1,RNU6-897P,RP11-427E4.1,RP11-809N15.2,RP11-809N15.3	S3(3.1)	0
chrY	7140500	7389500	249	Yp11.2	0.472	PRKY,RN7SKP282,RNU6-521P,RNU6-941P,Y_RNA:806	NULL	0
chr7	92219708	92468500	249	7q21.2	4.079	AC002454.1,CDK6,RNU6-10P	S1(4.8)	0
chr6	12008500	12256500	248	6p24.1	0.597	HIVEP1,RP11-456H18.2	S2(4.4)	0
chr12	3185500	3432500	247	12p13.32-33	0.447	RP11-543P15.1,RP5-1063M23.1,RP5-1063M23.2,TSPAN9,TSPAN9-IT1	S1(5)	0
chr1	71545500	71792500	247	1p31.1	0.037	AL360297.1,RP11-386O9.2,ZRANB2,ZRANB2-AS2	S3(2.8)	0
chr3	100466500	100713500	247	3q12.2	0.163	ABI3BP,RNU6-865P,RP11-301G23.1,TFG	S2(4.4)	0
chr1	180226500	180473500	247	1q25.2-3	1.264	ACBD6,LHX4,MIR3121,RP5-1180C10.2,VDAC1P4	S1(4.8)	0
chr3	47884500	48131500	247	3p21.31	2.588	DHX30,MAP4,MIR1226,RP11-1029M24.4,VPS26BP1,Y_RNA:522	S1(5.3)	0
chr2	87753500	88000502	247	2p11.2	0.142	AC133644.3,AC133965.1,LINC00152,MIR4435-1,RP11-1399P15.1	S1(4.9)	0
chr5	92674500	92920500	246	5q15	0.895	NR2F1,NR2F1-AS1	S2(4.2)	0
chr4	95368500	95614500	246	4q22.3	3.713	AC109925.1,PDLIM5,RP11-554D13.1	S1(4.9)	0
chr11	27527500	27773500	246	11p14.1	0.096	BDNF,BDNF-AS,LIN7C,LINC00678,RNA5SP339,RP11-587D21.1,RP11-587D21.4	S1(4.9)	0
chr1	53953500	54199877	246	1p32.3	1.342	GLIS1,RNU7-95P	S1(5.1)	0
chr11	28128500	28373653	245	11p14.1	1.01	AC104978.1,KIF18A,METTL15,RN7SKP158,RP11-797J4.1	S2(4.3)	0
chr2	133173500	133418098	245	2q21.2	0.21	AC104405.1,GPR39,LYPD1,RN7SKP103,YBX1P7	S3(3.1)	0
chr6	136870500	137115500	245	6q23.3	0.75	MAP3K5,MAP7,RNA5SP219,RP3-325F22.3,RP3-325F22.5	S3(3.4)	0
chr12	16499500	16744500	245	12p12.3	0.44	AC007528.1,LMO3,MGST1,RP11-424M22.1,RP11-424M22.3,RP11-473N11.2	S4(2)	0
chr7	11012500	11257500	245	7p21.3	0.41	AC004538.3,AC005007.3,PHF14	S4(1.7)	0
chr9	128504500	128749500	245	9q33.3	4.514	PBX3,RP11-423C15.3	S1(4.9)	0
chr4	5471500	5715500	244	4p16.2	0.558	C4orf6,EVC,EVC2,STK32B	S3(3.3)	0
chr13	84711500	84955500	244	13q31.1	0.221		S4(1.8)	0
chr15	67542500	67786500	244	15q23	0.051	AAGAB,IQCH,IQCH-AS1	S1(4.9)	0
chrX	139836500	140080500	244	Xq27.1	0.036	CDR1,LINC00632,MIR320D2,RP11-298A8.2	S4(1.7)	0
chr15	71145500	71389290	244	15q23	0.189	KRT8P9,LARP6,LRRC49,RPL5P3,THAP10	G1(5.6)	0
chr1	46268500	46512489	244	1p34.1	0.75	MAST2,PIK3R3,TMA16P2	S1(5)	0
chr10	67328500	67572500	244	10q21.3	0.075	AC022538.1,RP11-222A11.1	G2(1.4)	0
chr13	49548500	49791500	243	13q14.2	2.246	COX7CP1,FNDC3A,OGFOD1P1,RAD17P2,RNU6-60P,RNY3P2	S1(4.7)	0
chr8	117962511	118205500	243	8q24.11	0.324	RN7SL228P,RN7SL826P,RP11-1059L18.1,RP11-654G14.1,SLC30A8	S2(3.7)	0
chr1	72738500	72981500	243	1p31.1	0.097	GDI2P2,NEGR1,RPL31P12	S3(3.2)	0
chr2	239751500	240024500	243	2q37.3	1.979	AC017028.10,AC017028.2,AC017028.3,AC017028.4,AC017028.5,AC017028.6,AC017028.7,AC017028.8,AC017028.9,AC114788.1,AC114788.2,HDAC4,MIR4440,MIR4441,RP11-648F7.1,TWIST2	S1(5.4)	0
chr6	106532500	106774500	242	6q21	0.931	ATG5,PRDM1,RN7SL47P,RNU6-344P,RP1-134E15.3	S1(5.3)	0
chr11	46957500	47199500	242	11p11.2	0.407	ARFGAP2,C11orf49,CTD-2384B9.1,PACSIN3,RP11-390K5.3,RP11-390K5.6	G1(5.5)	0
chr14	55031500	55273500	242	14q22.2	3.971	SAMD4A	S1(5.1)	0
chr17	75276500	75518500	242	17q25.2-3	2.835	MIR4316,RP11-285E9.6,RP11-75C10.7,RP11-75C10.9,RP11-936I5.1,SEPT9,Y_RNA:234	S1(5)	0
chr6	108615500	108857500	242	6q21	0.289	LACE1,RNU6-770P,RP1-128O3.6,RP11-72I2.1,RP3-466I7.1	S2(4.1)	0
chr8	9408500	9650500	242	8p23.1	1.248	MIR597,RP11-1081K18.1,RP11-375N15.2,TNKS	S3(2.6)	0
chr7	134429002	134671258	242	7q33	21.748	CALD1	S1(5.2)	0
chr19	28978500	29219500	241	19q12	0.058	AC005307.3,AC005394.1,AC005616.1,AC005616.2,AC079466.1	S4(2.1)	0
chr16	78132500	78373500	241	16q23.1	0.081	RP11-190D6.2,WWOX	S4(1.7)	0
chr2	218380500	218621278	241	2q35	0.061	AC010886.2,DIRC3	S1(4.5)	0
chr2	214147500	214388500	241	2q34	0.177	AC079610.2,SPAG16	S3(2.8)	0
chr11	3875500	4115936	240	11p15.4	0.789	AC090587.4,AC090587.5,AC090804.1,HNRNPA1P76,MIR4687,RP11-438N5.2,RP11-438N5.4,RPS29P20,SNORA7:1,STIM1	S1(5)	0
chr2	106356500	106596500	240	2q12.2	0.844	AC009505.2,AC009505.4,NCK2	S3(3)	0
chr16	27560500	27800500	240	16p12.1	0.459	AC002551.1,AC016597.1,CTD-2049O4.1,GSG1L,GTF3C1,KIAA0556,Y_RNA:207	S2(3.9)	0
chr12	112581500	112821500	240	12q24.13	0.605	HECTD4,RN7SKP71,RP3-521E19.2,RP3-521E19.3,RPL7AP60,TRAFD1,Y_RNA:80	S1(5.4)	0
chr4	157658500	157898500	240	4q32.1	3.375	PDGFC,RP11-154F14.2,RP11-612J15.3	S1(4.6)	0
chr1	144835867	145076186	240	1q21.1	1.365	AL138796.1,AL590452.1,PDE4DIP,RN7SKP88,RNU2-38P,RP11-326G21.1,RP4-791M13.4,RP4-791M13.5	S1(5.4)	0
chr8	6263500	6503575	240	8p23.1	0.464	ANGPT2,CTD-2541M15.1,CTD-2541M15.3,MCPH1,RP11-115C21.2,RP11-115C21.4	S2(3.9)	0
chr19	31601500	31841500	240	19q12	0.441	AC007796.1,AC020952.1,CTC-439O9.3,TSHZ3	S2(3.9)	0
chr1	155293967	155533500	240	1q22	1.125	ASH1L,ASH1L-AS1,ASH1L-IT1,MIR555,POU5F1P4,RNU6-106P,RNU6-1297P,RUSC1,snoU13:194	S1(5.4)	0
chr19	43607500	43846500	239	19q13.31	0.036	AC005392.13,CEACAMP10,CEACAMP11,CEACAMP4,CTC-490G23.2,PSG4,PSG5,PSG9	G1(5.6)	0
chr7	91272827	91511500	239	7q21.2	0.218	MTERF	S2(3.6)	0
chrY	21001199	21240500	239	Yq11.222	0.359	CD24P4,MTCYBP2,OFD1P7Y,RNU6-255P,TTTY14,ZNF839P1	NULL	0
chr11	8693413	8932500	239	11p15.4	1.545	RNA5SP330,RP11-152H18.3,RP11-152H18.4,RP11-318C2.1,RPL27A,SNORA3:1,SNORA45,ST5,Y_RNA:71	G1(5.5)	0
chr7	131337500	131576500	239	7q32.3	0.035	AC008085.1,AC093106.4,AC093106.5,AC093106.6,AC093106.7	S1(4.5)	0
chr9	123103500	123342448	239	9q33.2	0.689	CDK5RAP2	S2(4.3)	0
chr1	64934500	65172500	238	1p31.3	0.32	CACHD1,MIR4794	S2(4)	0
chr6	83538500	83776500	238	6q14.1	0.18	LAP3P1,RP11-445L13__B.3,UBE3D	S2(4.3)	0
chr3	69787500	70025500	238	3p13-14	0.528	AC099326.1,MITF,RN7SL418P	S2(4.1)	0
chr8	95907994	96146031	238	8q22.1	0.233	CCNE2,MIR3150B,NDUFAF6,RNU6-1209P,RP11-320N21.2,RP11-347C18.3,RP11-347C18.4,TP53INP1,snoU13:429	S1(4.8)	0
chr4	87510500	87748500	238	4q21.3	1.347	MAPK10,PTPN13,SLC10A6	S1(5)	0
chr6	83903655	84141500	238	6q14.2	0.676	AL391416.1,ME1,RP11-378G13.2,RWDD2A	S3(3.4)	0
chr2	203241658	203479575	238	2q33.1-2	1.014	AC009960.1,AC073410.1,BMPR2,RP11-27M5.1	S1(4.9)	0
chr4	129208500	129446500	238	4q28.2	0.039	PGRMC2,RP11-420A23.1	S1(4.8)	0
chr4	68565500	68802500	237	4q13.2	0.11	GNRHR,RP11-453E17.3,RP11-453E17.4,SNORA62:6,ST3GAL1P1,TMPRSS11A,TMPRSS11CP,TMPRSS11D,UBA6,UBA6-AS1	S2(3.5)	0
chr18	64915500	65152203	237	18q22.1	0.289	AC091042.1,CTD-2541J13.1,RP11-563H6.1	S2(3.9)	0
chr6	130451500	130688500	237	6q23.1	0.088	L3MBTL3,RP11-73O6.3,SAMD3,TMEM200A	S1(4.6)	0
chr8	62391500	62628500	237	8q12.3	6.843	ASPH,CLVS1,KRT8P3,MIR4470,RN7SKP97	S2(4.3)	0
chr12	118573831	118810750	237	12q24.23	1.001	AC026366.1,PEBP1,RPS2P5,TAOK3	S2(3.7)	0
chr6	135587500	135824500	237	6q23.3	0.525	AHI1,LINC00271,RP3-388E23.2,Y_RNA:636	S2(4.4)	0
chr1	232529500	232766500	237	1q42.2	0.202	SIPA1L2	S3(3.1)	0
chr10	114710008	114946500	236	10q25.2-3	1.075	RP11-139K1.2,RP11-57H14.2,TCF7L2	S2(4.3)	0
chr17	58234500	58470500	236	17q23.1-2	1.608	C17orf64,CA4,FAM106DP,RP11-3K24.1,RP11-3K24.2,SCARNA20:5,USP32	S1(5.2)	0
chr11	17798500	18034500	236	11p15.1	0.316	KCNC1,RP1-59M18.2,SERGEF	S3(3.2)	0
chr7	156450387	156686500	236	7q36.3	0.45	LMBR1,RNF32,RNU4-31P	S3(3.1)	0
chr5	110847923	111083500	236	5q22.1	0.054	AC008967.1,CTD-2367A17.1,HMGN1P13,NREP,RN7SKP57,STARD4,STARD4-AS1	S2(3.7)	0
chr18	55836500	56072500	236	18q21.31	2.147	NEDD4L,RP11-718I15.1,RP11-845C23.2,RP11-845C23.3	S1(5.3)	0
chr13	76209500	76445186	236	13q22.2	11.593	FAM204CP,LMO7,RP11-173B14.5,RP11-29G8.3	S1(4.8)	0
chr16	85391068	85625871	235	16q24.1	0.933	AC092377.1,RP11-118F19.1,RP11-680G10.1	S1(5)	0
chr13	20437500	20672500	235	13q12.11	0.776	AL591925.1,KRR1P1,ZMYM2,ZMYM5,snoU13:62	S2(4)	0
chr15	70820500	71055932	235	15q23	2.343	RP11-138H8.2,RP11-64K10.1,UACA	S1(5.4)	0
chr4	178362500	178597500	235	4q34.3	0.138	AC078881.1,AGA,RNA5SP172,RP11-130F10.1	S2(3.5)	0
chrX	71129500	71364033	235	Xq13.1	0.341	NHSL2,RGAG4,RNU6-1078P,RP11-262D11.1,RPS26P11	S1(4.7)	0
chr6	42185603	42420500	235	6p21.1	1.737	TRERF1,U3:61	S1(5.1)	0
chr9	97845500	98080500	235	9q22.32	0.386	C9orf3,FANCC,MIR23B,MIR27B,MIR3074,RNA5SP288,RP11-173G21.1,RP11-80I15.1,RP11-80I15.4,snoU13:448	S2(3.8)	0
chr2	54683500	54918500	235	2p16.2	2.068	AC092839.1,AC092839.3,AC092839.4,AC093110.3,SPTBN1	S1(4.7)	0
chr14	71373500	71607500	234	14q24.2	1.449	PCNX,PTTG4P,RP5-1163L11.2,RP5-1163L11.3	S1(4.9)	0
chr1	235812500	236046940	234	1q42.3	1.045	GNG4,LDHAP2,LYST,LYST-AS1,MIR1537,RNU5E-2P	S1(5.2)	0
chr12	100169421	100403616	234	12q23.1	0.05	ANKS1B,RPS4XP1	S3(2.5)	0.398	2		2
chr15	64752940	64987239	234	15q22.31	1.062	GAPDHP61,OAZ2,RNU6-549P,RP11-330L19.1,RP11-330L19.2,RP11-702L15.4,Y_RNA:175,ZNF609	S1(5.3)	0
chr5	90675500	90909500	234	5q14.3	0.097	ARRDC3,RAB5CP2	S2(3.8)	0
chr3	105071500	105305500	234	3q13.11	3.401	ALCAM	S2(3.6)	0
chr9	17578500	17812500	234	9p22.2	0.251	PABPC1P11,SH3GL2	S3(3.3)	0
chr3	105354500	105588500	234	3q13.11	1.044	CBLB	S2(3.9)	0
chr15	52587970	52821247	233	15q21.2	1.004	EEF1B2P1,MYO5A,MYO5C	S1(5.1)	0
chr10	49632500	49865500	233	10q11.22	2.246	ARHGAP22,ARHGAP22-IT1,MAPK8,RP11-534L6.5,RP11-541M12.3	S2(3.6)	0
chr4	169960500	170193500	233	4q32-33	2.992	RP11-327O17.2,RPL6P12,SH3RF1	S1(5.3)	0
chr2	138813500	139046363	233	2q22.1	0.083	AC069394.1,AC097523.1,AC097523.2	S3(2.9)	0
chr15	63893788	64126500	233	15q22.31	1.179	FBXL22,HERC1,RP11-317G6.1	S1(5.2)	0
chr19	42900500	43133500	233	19q13.2	0.081	CEACAM1,CEACAM8,CEACAMP1,CEACAMP2,CTB-50E14.4,CTB-50E14.5,CXCL17,LIPE,LIPE-AS1,RNU4-60P	S1(4.9)	0
chr7	66055500	66288500	233	7q11.21	1.275	GS1-124K5.12,GTF2IRD1P1,KCTD7,RABGEF1,RP11-792A8.3,RP11-792A8.4,RP4-756H11.3,RPL35P5,snoU13:410	G1(5.5)	0
chr7	140396877	140629500	233	7q34	0.886	BRAF,NDUFB2,U6:11	S2(4)	0
chr13	28841500	29074500	233	13q12.2-3	1.015	FLT1,PAN3	S1(5.2)	0
chr4	99177500	99409500	232	4q23	1.24	RAP1GDS1,RP11-323J4.1,RP11-810D13.1,TSPAN5	S1(4.6)	0
chr16	80606705	80838500	232	16q23.2	0.855	AC092332.1,CDYL2,CTD-2055G21.1,RP11-18F14.4	S2(3.6)	0
chr2	238535500	238767535	232	2q37.3	1.713	LRRFIP1,RBM44	S1(5.3)	0
chr6	110905500	111137500	232	6q21	0.776	CDK19,RNU6-957P,RP11-346C16.1,RP11-346C16.2,RP11-346C16.6,RP11-569A2.2	S1(5.1)	0
chr2	3150500	3382500	232	2p25.3	0.652	AC019118.4,TSSC1,TSSC1-IT1	S2(3.7)	0
chr2	215447500	215679500	232	2q35	0.866	AC072062.1,AC107218.3,BARD1,ENSAP3	S4(2.2)	0
chr4	134699500	134931845	232	4q28.3	0.201	RP11-427M20.1	S3(2.6)	0
chr22	43179500	43411151	232	22q13.2	1.429	AL049758.2,ARFGAP3,GOLGA2P4,PACSIN2	S1(5.3)	0
chr4	87855500	88087995	232	4q21-22	1.007	AFF1,C4orf36,KLHL8,TECRP1	S1(5.1)	0
chr2	67679500	67911209	232	2p14	0.042	AC007422.1,AC010987.5	S2(4.2)	0
chr4	152014500	152246784	232	4q31.3	0.884	PRSS48,RNU6-1282P,RP11-372K14.2,RP11-731D1.1,RP11-731D1.3,RPS3A,SH3D19,SNORD73,SNORD73A	S2(4.3)	0
chr3	141637863	141868386	231	3q23	0.332	ATP1B3,RNU6-425P,RP11-271K21.11,RP11-343B5.1,TFDP2	S1(4.8)	0
chr3	176684500	176915500	231	3q26.32	1.959	MTND5P15,RNU6-681P,TBL1XR1,TBL1XR1-AS1,Y_RNA:513	S3(3.4)	0
chr10	21810500	22041500	231	10p12.31	1.721	HNRNPRP1,MLLT10,RNU6-1141P,RNU6-306P,SKIDA1	S2(4.3)	0
chr9	134725500	134956500	231	9q34.13	1.128	MED27,RP11-32B11.2	S1(4.5)	0
chr18	12427500	12658133	231	18p11.21	0.898	AP001029.1,AP005482.1,RP11-861E21.1,RP11-861E21.2,RP11-861E21.3,SLMO1,SPIRE1,snoU13:153	S1(5.1)	0
chr4	129784500	130015500	231	4q28.2	0.683	C4orf33,PHF17,SCLT1	S3(3)	0
chr3	15670500	15901500	231	3p25.1	3.047	ANKRD28,BTD,MIR3134,RN7SL4P,RP11-44D5.1	S1(5.3)	0
chr12	45608500	45838548	230	12q12	2.149	ANO6,PLEKHA8P1	S2(3.6)	0
chr11	7698453	7928500	230	11p15.4	0.071	OR10AB1P,OR5E1P,OR5P1P,OR5P2,OR5P3,OR5P4P,OVCH2,RNU6-943P,RP11-35J10.4,RP11-35J10.5,RP11-494M8.1,RP11-494M8.4	S2(4.3)	0
chr5	60627500	60857500	230	5q12.1	1.567	AC008836.1,RP11-631M6.2,RP11-631M6.3,RPL3P6,ZSWIM6	S1(4.5)	0
chr16	64930500	65160500	230	16q21	3.088	CDH11	S3(3.3)	0
chr2	159312500	159541500	229	2q24.1	0.911	AC005042.2,AC005042.4,CCDC148,PKP4,snoZ5	S2(3.5)	0
chr17	295730	624957	229	17p13.3	0.594	RP11-411G7.2,RP5-1029F21.2,RP5-1029F21.3,RP5-1029F21.4,RPS4XP17,VPS53	S1(5.1)	0
chr7	84122040	84351500	229	7q21.11	0.049	AC003984.1,AC092022.1,RPL7P30	S2(4.3)	0
chr19	43319500	43548500	229	19q13.2-31	0.014	AC004603.4,CEACAMP7,CEACAMP8,PSG1,PSG10P,PSG11,PSG6,PSG7,PSG8	G1(5.6)	0
chr2	213788500	214017500	229	2q34	0.32	AC079610.1,IKZF2,MIR4776-2	S2(3.9)	0
chr3	140947500	141176500	229	3q23	0.23	ACPL2,RP11-438D8.2,RP11-764I5.1,RP11-789L4.1,ZBTB38	G1(5.6)	0
chr6	18263500	18492500	229	6p22.3	0.36	DEK,RNF144B,RNU6-263P,RP11-528A10.1,RP11-528A10.2,Y_RNA:640,snoU13:379	S1(4.8)	0
chr4	144480624	144709500	229	4q31.21	0.066	FREM3,GUSBP5,RP11-780M14.1,RP13-578N3.3	S3(3.2)	0
chr1	52606500	52834348	228	1p32.3	0.35	ANAPC10P1,CC2D1B,DNAJC19P7,PDCL3P6,RN7SL788P,RP11-155O18.6,RP4-800M22.1,RP4-800M22.2,RP4-800M22.4,ZFYVE9	S1(5.1)	0
chr8	90769955	90997500	228	8q21.3	0.466	COX6B1P6,NBN,OSGIN2,RIPK2,RNU6-925P	S1(5.3)	0
chr12	51983500	52211682	228	12q13.13	1.515	AC068987.1,HNRNPA3P10,RP11-923I11.3,SCN8A	S1(5.1)	0
chr3	16328500	16556500	228	3p24-25	1.121	OXNAD1,RFTN1,RP11-415F23.2,RP11-415F23.3,RP11-415F23.4	S1(5.1)	0
chr2	173690500	173918500	228	2q31.1	0.024	ALDH7A1P2,RAPGEF4	S1(5.3)	0
chr2	71680851	71908500	228	2p13.2	0.025	DYSF	S2(4)	0
chr10	28068500	28296500	228	10p12.1	0.378	ARMC4,RN7SKP132,RP11-218D6.3,RP11-218D6.4,RPL36AP55	S1(4.6)	0
chr3	11533500	11761500	228	3p25.3	1.597	ATG7,RP11-169K17.2,RP11-169K17.3,RP11-169K17.4,VGLL4	S1(4.8)	0
chr5	78055500	78282500	227	5q14.1	0.261	ARSB,LHFPL2	S1(4.9)	0
chr1	44171494	44398991	227	1p34.1	1.065	KDM4A-AS1,RNU6-1058P,RP11-184I16.3,RP11-184I16.4,SHMT1P1,ST3GAL3	G1(5.5)	0
chrX	109245500	109472500	227	Xq23	0.276	AMMECR1,MIR3978,MIR652,SNORD96B,TMEM164	S1(4.9)	0
chr14	100204029	100430865	227	14q32.2	0.355	EML1,RNU1-47P	S1(5.1)	0
chr3	42054500	42280500	226	3p22.1	2.349	RNU4-78P,RP11-193I22.2,TPMTP2,TRAK1	S2(4.2)	0
chr1	214500500	214726500	226	1q41	2.839	KRT18P12,PTPN14,RP11-176D17.3,RP11-365D23.4,SMYD2	S1(5.3)	0
chr10	31607500	31833500	226	10p11.22	1.975	RP11-192P3.5,SPTLC1P1,ZEB1,ZEB1-AS1	S1(4.9)	0
chr10	69671500	69897500	226	10q21.3	5.875	AL356741.1,HERC4,MYPN,POU5F1P5,RN7SL220P,RP11-474D14.2,SIRT1	G1(5.5)	0
chr1	48712500	48938500	226	1p33	0.07	PPP1R8P1,RNU4-61P,RNU6-723P,RP11-329A14.1,SLC5A9,SPATA6	S4(1.8)	0
chr5	96517500	96742500	225	5q15	0.036	CTD-2215E18.1,CTD-2215E18.2,CTD-2215E18.3,CTD-2278B20.1,RIOK2,RP11-155G15.2,YTHDF1P1	S2(3.9)	0
chr6	57321500	57546500	225	6p11.2	1.367	PRIM2,RP1-71H19.2	S4(1.8)	0
chr6	166816500	167041500	225	6q27	0.64	FAM103A2P,MIR1913,RPS6KA2,RPS6KA2-IT1,Z98049.1	S3(2.7)	0
chr15	64455404	64680500	225	15q22.31	0.924	CSNK1G1,CTD-2116N17.1,KIAA0101,SNORA48:2,TRIP4	S1(5.4)	0
chr1	87379500	87604500	225	1p22.3	0.31	HS2ST1,RP11-384B12.2,RP11-384B12.3,RP4-604K5.2,RP4-604K5.3,RP5-1052I5.1,RP5-1052I5.2,SEP15	S2(4)	0
chr2	187126646	187351500	225	2q32.1	0.243	MED28P3,RP11-410E4.1,ZC3H15	S2(3.6)	0
chr1	107681500	107906500	225	1p13.3	0.048	NTNG1	S4(2.3)	0
chr4	150998500	151223500	225	4q31.23-3	8.67	DCLK2,LRBA,RNU7-194P	S1(4.9)	0
chr3	110785500	111009500	224	3q13.13	2.109	PVRL3,PVRL3-AS1	S2(3.9)	0
chr1	184724047	184948500	224	1q25.3	1.819	FAM129A,RNU7-13P	S1(4.7)	0
chr1	66994500	67218141	224	1p31.3	7.44	AL139147.1,AL354978.1,MIR3117,SGIP1	S1(5)	0
chr5	138088500	138312500	224	5q31.2	2.121	AC034243.1,CTNNA1,LRRTM2,RN7SL867P,SIL1	S1(4.5)	0
chr1	208194500	208418500	224	1q32.2	1.18	PLXNA2	S1(4.5)	0
chr6	162925500	163149500	224	6q26	0.028	KRT8P44,PACRG,PARK2	S4(1.5)	0
chrX	22050558	22274500	224	Xp22.11	0.055	PHEX,PHEX-AS1,RN7SL436P	S2(3.8)	0
chr16	68055500	68279206	224	16q22.1	0.502	AC130462.1,DDX28,DUS2,ESRP2,NFATC3,RP11-67A1.2,RP11-96D1.10,RP11-96D1.11,RP11-96D1.5,RP11-96D1.6,RP11-96D1.9,RPS12P27,SNORA48:4,Y_RNA:214	S1(5.2)	0
chr1	230202500	230426500	224	1q42.13	1.538	GALNT2,RP5-956O18.2,RP5-956O18.3	S3(2.7)	0
chr7	26681500	26905500	224	7p15.2	0.24	C7orf71,SKAP2	S2(3.5)	0
chr2	203879500	204103662	224	2q33.2	0.812	AC011737.2,AC023271.1,AC023271.2,NBEAL1,RPL7P14,SNORA1:4,WDR12	S1(4.7)	0
chr16	89333938	89556969	223	16q24.3	2.699	AC137932.1,AC137932.5,AC137932.6,ANKRD11,RNU6-430P,RP1-168P16.1,RP1-168P16.2,RP1-168P16.3	S1(5.2)	0
chr4	114683083	114906500	223	4q26	1.195	ARSJ,RP11-26P13.2,RP11-397D21.1	S1(4.9)	0
chr8	32400500	32623642	223	8p12	6.663	NRG1	S1(4.6)	0
chr12	31521500	31744500	223	12p11.21	0.669	DENND5B,DENND5B-AS1,RNU6-618P,RP11-771K4.1,RP11-820K3.2,RP11-820K3.3,RP11-820K3.4,Y_RNA:108,snoU13:47	S2(4)	0
chr12	59984500	60207500	223	12q14.1	1.252	RP11-813P10.1,RP11-813P10.2,SLC16A7	S3(3.3)	0
chr15	28349500	28572500	223	15q13.1	0.486	HERC2,RPL41P2	S3(2.5)	0
chr20	40024500	40247500	223	20q12	1.273	CHD6,RP4-620E11.4,RPL12P11	S1(5)	0
chr6	158733691	158956500	223	6q25.3	0.852	CACYBPP3,RN7SL173P,RP11-732M18.2,TULP4	S1(5.1)	0
chr4	7723500	7946500	223	4p16.1	2.182	AC097381.1,AFAP1,AFAP1-AS1,SORCS2	S1(5.1)	0
chr4	100008500	100230500	222	4q23	0.08	ADH1A,ADH1B,ADH4,ADH5,ADH6,PCNAP1,RP11-696N14.1	S2(3.7)	0
chr9	113120500	113342160	222	9q31.3	0.419	RNU6-1039P,RNU6-124P,SVEP1	S1(5.2)	0
chr2	36578500	36800500	222	2p22.2-3	22.682	AC007401.2,CRIM1,FEZ2,RP11-490M8.1,RP11-78I14.1	S1(5)	0
chr2	161128391	161350500	222	2q24.2	4.373	ITGB6,MIR4785,RBMS1,RMRPP3	S1(4.8)	0
chr7	48211500	48433500	222	7p12.3	0.021	ABCA13	S3(3.3)	0
chr2	191292500	191514500	222	2q32.2	0.121	AC093388.3,MFSD6,NAB1,RN7SKP179,RP11-647K16.1,TMEM194B	S1(4.8)	0
chr2	102309500	102530500	221	2q11.2	3.218	FLJ20373,MAP4K4	S1(4.8)	0
chr2	53866500	54087297	221	2p16.2	0.465	AC008064.1,ASB3,CHAC2,ERLEC1,GPR75,GPR75-ASB3,MIR3682,snoU13:269	S2(3.9)	0
chr6	472500	693500	221	6p25.3	0.916	EXOC2,HUS1B,RP1-20B11.2,RP11-532F6.2	S3(3.2)	0
chr6	2244500	2465500	221	6p25.2-3	0.147	AL031768.1,GMDS,GMDS-AS1,HMGN2P28,RP1-136B1.1	S2(3.5)	0
chr12	29301500	29522500	221	12p11.22	0.251	ERGIC2,FAR2,RP11-946L16.1,RP11-996F15.2	S3(3.4)	0
chr15	62132500	62353500	221	15q22.2	0.795	RN7SL613P,RP11-16B9.1,RP11-643M14.1,VPS13C	S3(3.3)	0
chr3	171308500	171529500	221	3q26.31	0.213	PLD1,PP13439,snoU13:290	S1(4.9)	0
chr2	165478358	165699500	221	2q24.3	2.591	AC019181.2,AC019181.3,COBLL1,SNORA70F	S1(4.6)	0
chr6	71910500	72131500	221	6q13	0.526	LINC00472,MIR30A,MIR30C2,OGFRL1,RP11-154D6.1,RP3-331H24.4,RP3-331H24.5	S1(4.8)	0
chrX	83537500	83758500	221	Xq21.1	0.142	HDX,RP11-74B21.1,RP6-33F8.1	S4(2.2)	0
chr1	41488909	41708500	220	1p34.2	1.023	RP11-399E6.1,RP4-635E8.1,SCMH1	S1(4.7)	0
chr18	43327180	43547240	220	18q12-21	1.418	EPG5,RP11-618K16.4,SIGLEC15,SLC14A1	S1(5.3)	0
chr1	217589500	217809500	220	1q41	0.962	GPATCH2,RP11-361K17.2,SPATA17	S4(2.2)	0
chr5	66253500	66473500	220	5q12.3	0.372	MAST4,MAST4-AS1	S3(3.4)	0
chr10	86083500	86303500	220	10q23.1	1.524	CACYBPP1,CCSER2,RPL12P29,TNPO1P1	S3(3.1)	0
chr5	156784500	157003500	219	5q33.3	1.207	AC106801.1,ADAM19,CTB-109A12.1,CTB-47B11.1,CTB-47B11.3,CYFIP2,NIPAL4	S1(5)	0
chr10	117814500	118033500	219	10q25.3	0.021	GFRA1	S4(2.2)	0
chr14	91309500	91528500	219	14q32.11	0.217	C14orf159,RPS6KA5	S2(3.6)	0
chr2	40269500	40488500	219	2p22.1	0.084	AC007377.1,SLC8A1,SLC8A1-AS1	S1(4.8)	0
chr22	46066500	46285500	219	22q13.31	4.328	ATXN10,MIR4762,RP1-37M3.8,WI2-85898F10.1	S1(5.3)	0
chrX	18442500	18661500	219	Xp22.13	0.203	CDKL5,GJA6P,RS1	S3(2.6)	0
chr13	33160500	33379500	219	13q13.1	0.881	PDS5B,RNY1P4	S2(4.4)	0
chr1	178694299	178913500	219	1q25.2	1.918	ANGPTL1,PTPN2P1,RALGPS2,RP11-428K3.1,SNORA63:3	S1(5)	0
chr22	24665500	24883500	218	22q11.23	1.046	ADORA2A,ADORA2A-AS1,AP000354.2,SPECC1L,SPECC1L-ADORA2A,UPB1	G1(5.5)	0
chr9	137532500	137750500	218	9q34.3	1.731	AL603650.1,AL603650.2,AL603650.3,AL603650.4,COL5A1,COL5A1-AS1,MIR3689A,MIR3689B,MIR3689C,MIR3689D1,MIR3689D2,MIR3689E,MIR3689F	S1(4.8)	0
chr10	94607500	94825500	218	10q23.33	0.219	CYP26C1,EXOC6,RP11-348J12.2,RP11-477L16.2	S1(4.9)	0
chr2	228833500	229051500	218	2q36.3	0.669	RNU6-624P,SPHKAP	S3(3)	0
chr13	42614500	42832500	218	13q14.11	0.899	AL139328.1,CHCHD2P11,DGKH,FHP1,MAPK6PS3,RP11-187A9.3	S1(4.9)	0
chr5	60239500	60457896	218	5q12.1	0.504	AC008498.1,ERCC8,NDUFAF2,SMIM15	S2(3.9)	0
chr3	28390636	28608500	218	3p24.1	0.106	AC093142.2,FAM96AP1,ZCWPW2	S4(2.2)	0
chr10	103113500	103330316	217	10q24.32	0.692	BTRC,RNU2-59P,snoU13:12	S1(4.6)	0
chr6	34857041	35074500	217	6p21.31	0.466	ANKS1A,RP11-527B17.2	S1(5.2)	0
chr7	95735500	95952500	217	7q21.3	0.768	AC084368.1,AC096775.2,DYNC1I1,MIR591,SLC25A13	S4(2.2)	0
chr3	67704500	67921500	217	3p14.1	0.065	AC113171.1,RP11-81N13.1,SUCLG2	S3(2.7)	0
chr2	32048505	32265500	217	2p22-23	1.12	AK2P2,AL121652.1,CTC-336P14.1,DPY30,MEMO1,RP11-1057B6.1	S2(4.4)	0
chr2	9346500	9563696	217	2p25.1	1.803	ASAP2,ITGB1BP1,RP11-385J23.1	S1(5.3)	0
chr16	14512729	14728500	216	16p13.12	0.749	AC092291.1,AC092291.2,BFAR,PARN,RN7SL274P	S1(5.2)	0
chr12	65672422	65888500	216	12q14.3	2.331	KRT18P60,MSRB3,RP11-230G5.2,RP11-305O6.3	G1(5.5)	0
chr14	35591051	35807500	216	14q13.2	0.661	AL121594.1,KIAA0391,PPP2R3C,PSMA6,RP11-173D9.1,RP11-173D9.5,RPL7AP3,RPL9P3	S1(5.2)	0
chr22	31089768	31305500	216	22q12.2	0.038	EIF4HP2,MIR3200,OSBP2	S1(4.7)	0
chr17	15903031	16119500	216	17p11-12	1.222	AC002553.1,AC002553.4,NCOR1,RN7SL442P,RNU6-314P,RNU6-862P,RPLP1P11,TTC19	S1(4.6)	0
chr13	110954500	111170500	216	13q34	1.886	COL4A1,COL4A2,COL4A2-AS1,COL4A2-AS2,snoU13:61	S1(5)	0
chr6	7050500	7266500	216	6p24-25	1.998	RP11-405O10.2,RREB1,Y_RNA:649	S2(3.7)	0
chr3	178578193	178794500	216	3q26.32	0.814	ZMAT3	S2(3.8)	0
chr8	77592500	77808500	216	8q21.11	0.158	ZFHX4,ZFHX4-AS1	S3(3.2)	0
chr1	161736083	161952500	216	1q23.3	0.787	ATF6,RP11-456P18.2	S1(5.1)	0
chr4	153242196	153458500	216	4q31.3	0.994	FBXW7,MIR3140,MIR4453,RP11-461L13.2	S2(4.2)	0
chr7	139241500	139482500	216	7q34	1.639	HIPK2,TBXAS1	S3(3.4)	0
chr3	132227500	132442500	215	3q22.1	0.643	ACAD11,ACKR4,DNAJC13,HSPA8P19,NPHP3,NPHP3-AS1,UBA5	S1(5.2)	0
chr10	122357720	122572500	215	10q26.12	0.045	C10orf85,WDR11-AS1	S3(2.5)	0
chr5	65220500	65435798	215	5q12.3	4.142	CTD-2033C11.1,ERBB2IP,SNORA76:4	S1(5.2)	0
chr1	172823500	173037500	214	1q24-25	0.056	AIMP1P2,RP1-15D23.2,RP3-471M13.2,TNFSF18	G1(5.5)	0
chr15	37179236	37393500	214	15q14	3.804	MEIS2,RP11-128A17.1,Y_RNA:181	S2(4.4)	0
chr2	215673500	215887283	214	2q35	0.077	ABCA12,AC016708.2,AC072062.1,AC072062.3,BARD1,SNORA70:15	S4(2.4)	0
chr4	40419500	40633500	214	4p14	0.107	AC098869.1,MIR4802,RBM47,RP11-588L15.1,RP11-588L15.2	S2(4.3)	0
chr4	123072500	123286500	214	4q27	0.9	KIAA1109	S2(3.6)	0
chr1	167190500	167404500	214	1q24.1-2	0.552	CD247,POU2F1,RP11-52A20.2	S3(2.7)	0
chr4	99366500	99580500	214	4q23	3.707	RP11-1299A16.3,RP11-724M22.1,TSPAN5	S1(4.9)	0
chr10	76585500	76799500	214	10q22.2	1.478	DUPD1,KAT6B,RP11-77G23.2,RP11-77G23.5	S1(5.2)	0
chr7	38735500	38949500	214	7p14.1	0.743	VPS41	S4(2.4)	0
chrX	117629500	117843500	214	Xq24	0.425	DOCK11,RBBP8P1,Y_RNA:790	S1(5.1)	0
chr15	93139692	93353500	214	15q26.1	0.094	ASB9P1,CTD-2313J17.1,CTD-2313J17.3,CTD-2313J17.5,FAM174B,HMGN1P38,RP11-386M24.1,RP11-386M24.3,RP11-386M24.4,RP11-386M24.5,RP11-386M24.8,RP11-386M24.9	S2(4.1)	0
chr15	29902500	30115500	213	15q13.1	0.971	HMGN2P5,RP11-300A12.2,RP11-680F8.1,RP11-680F8.3,RP11-680F8.4,TJP1,TUBBP8	S2(4.1)	0
chr2	178045500	178258500	213	2q31.2	0.951	AC019080.1,AC074286.1,AC079305.10,AC079305.8,AGPS,DNAJC19P5,HNRNPA3,KRT8P40,MIR3128,MIR4444-1:1,NFE2L2,RP11-337N6.1,RP11-337N6.2,Y_RNA:420,snoU13:260	S2(4.1)	0
chr17	44089500	44302500	213	17q21.31	2.072	KANSL1,KANSL1-AS1,MAPT,RNU7-101P,RP11-669E14.6,Y_RNA:245	S1(4.9)	0
chr2	39456729	39669500	213	2p22.1	2.311	AC007246.3,MAP4K3,RNU6-1185P,RP11-449G16.1,SNORA67:4	S1(5)	0
chr8	136469500	136682500	213	8q24.23	0.553	KHDRBS3,MAPRE1P1	S4(2.4)	0
chr18	20806500	21018500	212	18q11.2	0.135	CABLES1,RP11-17J14.2,TMEM241	S1(5)	0
chr3	16925500	17137500	212	3p24.3	0.383	MIR3714,PLCL2,PLCL2-AS1	S2(4)	0
chr13	75845500	76057500	212	13q22.2	0.691	TBC1D4,TBC1D4-AS1	S1(4.7)	0
chr9	79073500	79285500	212	9q21.13-2	0.254	AL161626.1,AL359314.1,GCNT1,PRUNE2,RP11-214N16.2	S1(4.8)	0
chr21	35014500	35226500	212	21q22.11	1.258	AP000304.12,CRYZL1,ITSN1	S1(5)	0
chr12	76742222	76954500	212	12q21.2	1.471	OSBPL8	S1(4.9)	0
chr7	24809244	25021500	212	7p15.3	2.862	AC004016.1,AC004016.2,OSBPL3	S1(5.1)	0
chr12	19592500	19804500	212	12p12.3	0.6	AEBP2,EEF1A1P4,RNU6-254P,RP11-841C19.1	S2(3.8)	0
chr10	103603677	103815950	212	10q24.32	0.855	C10orf76,Y_RNA:20	S1(5.4)	0
chr3	194780500	194991896	211	3q29	0.588	MIR3137,RN7SL36P,RNU6-25P,XXYLT1,XXYLT1-AS1,XXYLT1-AS2	S2(4.1)	0
chr11	77918500	78129394	211	11q14.1	0.837	GAB2,RP11-452H21.1,RP11-452H21.2,USP35	S1(5)	0
chr17	59729500	59940882	211	17q23.2	1.039	BRIP1	S1(4.7)	0
chr9	88147500	88358500	211	9q21.33	0.25	AGTPBP1	S4(2)	0
chr11	34169500	34380500	211	11p13	0.291	ABTB2,RP1-145M24.1,Y_RNA:46	S1(5)	0
chr7	75157478	75368500	211	7q11.23	0.462	HIP1,RN7SL642P	S1(5.4)	0
chr2	136288500	136499188	211	2q21.3	0.576	MIR128-1,R3HDM1,RNU6-512P,ZRANB3	S2(3.9)	0
chr3	122785500	122996199	211	3q21.1	0.731	PDIA5,SEC22A	S1(4.5)	0
chr16	16042500	16253500	211	16p13.11	1.553	ABCC1,ABCC6,RPL17P40	S1(5.1)	0
chr13	47126500	47337500	211	13q14.13-2	1.203	LRCH1	S2(3.9)	0
chr5	126107500	126318500	211	5q23.2	0.637	LMNB1,MARCH3,RP11-434D11.4	S2(4.3)	0
chr21	30047170	30258500	211	21q21.3	0.224	N6AMT1,RNU6-872P	S1(4.8)	0
chr12	46122500	46333500	211	12q12	0.864	ARID2,KNOP1P2,RN7SL246P,SCAF11	S2(3.7)	0
chr2	175659500	175870097	211	2q31.1	0.491	CHN1,Y_RNA:419	S1(5)	0
chr2	211341500	211552500	211	2q34	0.071	CPS1,LANCL1	S4(1.5)	0
chrX	7064500	7274500	210	Xp22.31	0.094	HDHD1,MIR4767,STS	S3(3)	0
chr5	41301500	41511500	210	5p13.1	0.232	PLCXD3	S3(3)	0
chr17	66255322	66465500	210	17q24.2	0.08	ARSG,MIR635,RP11-120M18.2,SLC16A6,WIPI1	S2(4.2)	0
chr7	128864500	129074273	210	7q32.1	0.208	AHCYL2,RNU7-16P,RP11-305M3.2	S1(5)	0
chr3	184999500	185209500	210	3q27.2	0.257	EHHADH,MAP3K13,RPL4P4,TMEM41A,snoU13:292	S2(4.3)	0
chr2	32853098	33063500	210	2p22.3	0.526	LINC00486,MIR4765,TTC27	S1(4.6)	0
chr4	79065500	79275500	210	4q21.21	0.018	AC093897.1,FRAS1,SERBP1P5	S2(3.9)	0
chr14	39734500	39944043	210	14q21.1	0.347	AL157791.1,CTAGE5,FBXO33,RP11-1074O12.1,RP11-407N17.3,RP11-407N17.5,RP11-647O20.1	S2(4.4)	0
chr16	15527500	15737123	210	16p13.11	1.057	C16orf45,CTB-193M12.1,KIAA0430,RP11-1021N1.1	S1(4.9)	0
chr3	57741500	57951500	210	3p14.3	0.816	PPIAP16,RP11-332H21.2,SLMAP	G1(5.5)	0
chr10	95047500	95257500	210	10q23.33	6.717	CEP55,MYOF	S1(5.2)	0
chr12	15737500	15947500	210	12p12.3	2.266	EPS8,PTPRO,RNU6-251P,RP11-6B19.1	S1(5.3)	0
chr17	80709939	80918500	209	17q25.3	0.751	AC068014.1,AC068014.2,B3GNTL1,RP11-497H17.1,RP11-567O16.1,TBCD,ZNF750	S1(4.6)	0
chr10	10838500	11047258	209	10p14	0.056	LINC00710,RP1-251M9.2	S3(3.4)	0
chr2	167024500	167233500	209	2q24.3	0.797	AC010127.3,RN7SKP152,SCN9A,snoU13:239	S3(3.4)	0
chr1	92143500	92352500	209	1p22.1	0.977	RN7SL653P,TGFBR3	S1(5.2)	0
chr4	80786500	80995500	209	4q21.21	1.261	ANTXR2,PCAT4	S1(4.6)	0
chr4	77869500	78078303	209	4q21.1	5.009	CCNI,RNU6-1187P,RP11-123J14.2,RP11-1E1.1,RP11-1E1.2,SEPT11	S1(4.6)	0
chr10	90967500	91176500	209	10q23.31	0.492	AL353751.1,IFIT1,IFIT1B,IFIT2,IFIT3,IFIT5,IFIT6P,LIPA,RP11-149I23.3	G1(5.6)	0
chr8	70377500	70585500	208	8q13.2-3	4.991	SLCO5A1,SULF1	S3(3.3)	0
chr12	120112500	120320500	208	12q24.23	1.356	CIT,MIR1178,PRKAB1,RP1-127H14.3	S2(4.2)	0
chr9	75191500	75399500	208	9q21.13	0.076	RP11-28P17.3,RPS20P24,TMC1	S1(4.5)	0
chr11	46408107	46615675	208	11p11.2	1.177	AMBRA1,MIR3160-2,RP11-425L10.1	G1(5.5)	0
chr2	230582500	230790500	208	2q36.3	2.169	FBXO36,RNU6-613P,TRIP12	S3(3.3)	0
chr10	74451500	74659500	208	10q22.1	1.057	MCU,MIR4676,OIT3,RP11-354E23.5	S1(5.1)	0
chr16	69165193	69373332	208	16q22.1	0.798	CHTF8,CIRH1A,COG8,PDF,RNU6-22P,RP11-343C2.11,RP11-343C2.12,RP11-343C2.7,RP11-343C2.9,RP11-70O5.2,SNTB2,VPS4A,Y_RNA:203	G1(5.6)	0
chr20	47236500	47444500	208	20q13.13	0.07	AL035106.1,PREX1	S1(4.7)	0
chr6	72892500	73099500	207	6q13	0.024	AL445256.1,RIMS1,RP5-1046G13.2	S2(4.4)	0
chr10	80026500	80233500	207	10q22.3	0.034	LINC00595,LINC00856:1,LINC00856:2,RP11-90J7.2,RP11-90J7.4,SNORA71:1	S1(4.7)	0
chr7	87256500	87463500	207	7q21.12	0.022	ABCB1,RUNDC3B,SLC25A40	S4(2.3)	0
chr16	14164500	14371500	207	16p13.12	0.62	AC040173.1,CTA-276F8.2,MKL2,TVP23CP2,Y_RNA:195	S1(4.9)	0
chr2	200117500	200324500	207	2q33.1	0.36	RP11-486F17.1,SATB2,SATB2-AS1	S3(2.8)	0
chr20	18568536	18775172	207	20p11.23	0.79	DTD1,DUXAP7,EEF1A1P34,LINC00652,RN7SL638P,RNU6ATAC34P,RP11-379J5.5	S3(3.3)	0
chr11	94439500	94646211	207	11q21	1.652	AMOTL1,RP11-856F16.2,RP11-867G2.8	S1(5)	0
chr2	69664760	69871500	207	2p13.3	2.242	AAK1,AC092431.2,RN7SL604P,RP11-427H3.3,RP11-77O7.1,SNORA36C	S1(5.3)	0
chr8	48670500	48877500	207	8q11.21	1.229	AC103686.1,MCM4,PRKDC,Y_RNA:723	S1(4.7)	0
chr2	179058500	179265560	207	2q31.2	0.415	OSBPL6	S2(4)	0
chr3	39889500	40096500	207	3p22.1	0.031	MYRIP,RNU4-56P	S2(4)	0
chr5	118119500	118325500	206	5q23.1	0.162	CTC-448D22.1,DTWD2,PTMAP2	S3(3.1)	0
chr17	2756500	2962500	206	17p13.3	0.43	CTD-3060P21.1,RAP1GAP2	S2(3.9)	0
chr11	8409500	8615836	206	11p15.4	0.047	SCARNA20:1,STK33	S1(4.5)	0
chr9	114937688	115143500	206	9q32	1.396	HSDL2,PTBP3,RN7SL430P,RN7SL57P,RNA5SP295,RP11-165N19.4,RP11-432F4.2	S1(5.3)	0
chr11	63748500	63954500	206	11q13.1	0.144	AP000721.4,FLRT1,MACROD1,OTUB1,RP11-21A7A.2,RP11-21A7A.3,RP11-21A7A.4,STIP1	G1(5.5)	0
chr16	9184500	9390500	206	16p13.2	1.521	C16orf72,RP11-473I1.10,RP11-473I1.5,RP11-473I1.9,RPL21P119	S1(4.9)	0
chr20	50179370	50385500	206	20q13.2	0.553	ATP9A,RP5-827A12.2	S1(4.8)	0
chr1	201592012	201798268	206	1q32.1	3.434	AC096677.1,IPO9-AS1,MIR1231,MIR5191,NAV1,RNU6-501P,RP11-25B7.1,RP11-90L20.2	S1(5.4)	0
chr5	140710251	140916500	206	5q31.3	0.733	DIAPH1,PCDHGA1,PCDHGA10,PCDHGA11,PCDHGA12,PCDHGA2,PCDHGA3,PCDHGA4,PCDHGA5,PCDHGA6,PCDHGA7,PCDHGA8,PCDHGA9,PCDHGB1,PCDHGB2,PCDHGB3,PCDHGB4,PCDHGB6,PCDHGB7,PCDHGB8P,PCDHGC3,PCDHGC4,PCDHGC5,RN7SL68P	S3(3.3)	0
chr2	42795500	43001500	206	2p21	0.504	AC074375.1,HAAO,MTA3,OXER1,RNU6-137P,Y_RNA:433	S1(4.6)	0
chr1	23037500	23243174	206	1p36.12	0.048	AL611946.1,EPHB2,MIR4253,MIR4684,RP11-69E9.1	S1(5)	0
chr18	39534500	39739246	205	18q12.3	0.989	PIK3C3,RP11-115N12.1	S3(3.2)	0
chr10	22803500	23008500	205	10p12.2	2.475	PIP4K2A	S2(3.5)	0
chr12	104644500	104849072	205	12q23.3	4.375	EID3,RP11-818F20.5,RPL18AP3,TXNRD1	S1(5.3)	0
chr20	39742500	39947500	205	20q12	1.888	PLCG1,RN7SL615P,RP1-1J6.2,RP3-511B24.5,RP3-511B24.6,RPL23AP81,TOP1,ZHX3	G1(5.5)	0
chr17	12692855	12897500	205	17p12	0.024	ARHGAP44,ELAC2,MIR1269B,RN7SL550P,RP11-1090M7.1,RP11-597M12.1	S3(3.1)	0
chr5	127215500	127420500	205	5q23.2-3	0.488	CTC-228N24.1,CTC-228N24.3,SLC12A2	S2(4.1)	0
chr10	31116500	31321500	205	10p11.22-23	0.409	DDX10P1,RP11-330O11.3,ZNF438	S1(5)	0
chr9	108005500	108210076	205	9q31.1-2	0.73	SLC44A1	S1(4.9)	0
chr9	2015500	2220500	205	9p24.2-3	0.913	RNU2-25P,RP11-264I13.2,SMARCA2	S3(3.2)	0
chr16	77821500	78025500	204	16q23.1	0.415	RP11-281J9.1,VAT1L	S4(1.9)	0
chr3	159449500	159653500	204	3q25.33	3.052	AC021654.1,IL12A-AS1,IQCJ-SCHIP1,IQCJ-SCHIP1-AS1,RNU2-31P,SCHIP1	S1(5.2)	0
chr8	67578500	67782983	204	8q13.1	0.443	C8orf44,C8orf44-SGK3,PTTG3P,SGK3,VCPIP1	S1(5)	0
chr17	65042500	65246500	204	17q24.2	1.286	CACNG1,HELZ,RP11-401F2.3,RP11-401F2.4,RPL36AP48	S2(4.4)	0
chr3	47620500	47824500	204	3p21.31	0.868	AC026318.1,CSPG5,RP11-395P16.1,RP11-717D12.1,SMARCC1	S1(5.1)	0
chr15	80695500	80899500	204	15q25.1	0.376	ARNT2,RP11-210M15.1,RP11-210M15.2,RP11-379K22.2,RP11-379K22.3,hsa-mir-5572	S1(5.4)	0
chr1	163088500	163292500	204	1q23.3	0.154	NUF2,RGS5,RP11-267N12.1,RP11-267N12.2,RP11-267N12.3,RP11-77M5.1	S1(4.9)	0
chr9	5627500	5831500	204	9p24.1	2.14	ERMP1,KIAA1432,RP11-207C16.4	S1(5.1)	0
chr4	159689500	159893500	204	4q32.1	1.331	C4orf45,FNIP2,RNU6-128P	S2(4.3)	0
chr2	174910500	175114500	204	2q31.1	0.967	OLA1,RN7SL65P,RP11-451F14.1	S1(4.6)	0
chr7	50657500	50861500	204	7p12.1	0.484	GRB10	S3(3.3)	0
chr20	2820500	3024267	204	20p13	0.905	PCED1A,PTPRA,VPS16	S1(4.9)	0
chr2	208687493	208891500	204	2q33.3	0.512	AC083900.1,PLEKHM3,RNU6-360P	S3(3.4)	0
chr6	76457500	76660500	203	6q14.1	0.551	IMPG1,MYO6,RNA5SP209,RNU6-155P,Y_RNA:629,snoU13:371	S1(4.7)	0
chr1	244613500	244816236	203	1q44	0.097	AC099757.1,ADSS,C1orf101,RP11-523K4.2	S2(4.1)	0
chr10	88515500	88718374	203	10q23.2	1.183	BMPR1A,MMRN2,RNU1-19P,RP11-359E3.4,RP11-420K10.1	S1(5.4)	0
chr6	71376500	71579500	203	6q13	0.711	B3GAT2,RP11-160A9.2,RP11-160A9.3,SMAP1	S3(2.9)	0
chr9	2641395	2844500	203	9p24.2	0.806	KCNV2,KIAA0020,VLDLR	S3(3.3)	0
chr4	174088500	174291119	203	4q34.1	0.369	GALNT7,HMGB2,MIR548T,RP11-10K16.1,RP11-798M19.3,RP11-798M19.6	S2(4.1)	0
chr13	52153500	52356500	203	13q14.3	2.19	ATP5F1P1,DHRS12,RN7SL413P,RNY1P6,WDFY2	S1(5.1)	0
chrX	62802500	63005426	203	Xq11.1-2	0.62	ARHGEF9,ARHGEF9-IT1,BTF3P8	S3(3)	0
chr11	45940363	46143500	203	11p11.2	0.89	AC024475.1,GYLTL1B,PHF21A,RP11-702F3.1	S1(4.9)	0
chr11	73107481	73309500	202	11q13.4	0.625	FAM168A,HMGN2P38,RELT,RP11-809N8.4,RP11-809N8.5,RP11-809N8.6	S1(5.3)	0
chr10	125450500	125652500	202	10q26.13	1.146	AC009987.1,CPXM2,GPR26,RP11-391M7.3	S3(3)	0
chr22	45064500	45266500	202	22q13.31	0.276	ARHGAP8,PRR5,PRR5-ARHGAP8	S2(3.9)	0
chr10	7859500	8061500	202	10p14	0.51	RP11-401E9.3,TAF3	S2(3.5)	0
chr5	36875500	37077500	202	5p13.2	1.647	KRT18P31,NIPBL	S2(3.8)	0
chr3	185341500	185543500	202	3q27.2	2.202	C3orf65,IGF2BP2,MIR548AQ,SENP2	S1(4.9)	0
chr2	173939500	174141500	202	2q31.1	1.768	MLK7-AS1,MLTK	S1(5.1)	0
chr13	48876500	49077500	201	13q14.2	1.087	LINC00441,LPAR6,PCNPP5,PPP1R26P1,RB1,RCBTB2	S2(4.2)	0
chr1	175976500	176177500	201	1q25.1-2	1.254	RFWD2,RP11-195C7.1,RP11-492I21.1	S4(1.9)	0
chr10	126279500	126480500	201	10q26.13	0.724	FAM53B,LHPP,METTL10,RP11-12J10.3,RP11-464O2.2,Y_RNA:4	S1(4.9)	0
chr1	77332500	77533604	201	1p31.1	0.484	AC096951.1,ST6GALNAC5	S2(3.8)	0
chr8	30240500	30440500	200	8p12	3.081	GTF2E2,RBPMS,RBPMS-AS1	S1(5)	0
chr7	5622500	5822500	200	7p22.1	1.175	FSCN1,RNF216,RNF216-IT1	S1(5.4)	0
chr1	235292251	235492500	200	1q42.3	1.235	AL391994.1,ARID4B,ARID4B-IT1,GGPS1,MIR4753,RBM34,RPL23AP23	S1(5.2)	0
chr12	860500	1060500	200	12p13.33	1.146	RAD52,RNU4ATAC16P,WNK1	S1(4.8)	0
chr4	9856500	10056560	200	4p16.1	0.039	RP11-448G15.1,RP13-560N11.1,SLC2A9	S2(3.6)	0
chr17	883010	1083500	200	17p13.3	0.266	ABR,AC015884.1,MIR3183,TIMM22	S1(5.1)	0
chr7	84621500	84821500	200	7q21.11	1.428	HSPA8P16,SEMA3D	S3(3.4)	0
chr17	53046087	53246183	200	17q22	0.242	COX11,STXBP4	S3(2.7)	0
chr2	237076089	237276202	200	2q37.2	0.197	AC079135.1,ASB18,GBX2,IQCA1,RNU1-31P	S3(3)	0
chr5	37050500	37250500	200	5p13.2	0.621	C5orf42,CTD-2284O10.3,NIPBL,OFD1P17,RN7SL37P,RPS4XP6	S1(4.5)	0
chr5	118405500	118604386	199	5q23.1	0.518	AC027320.1,CTB-161M19.4,DMXL1,LAMTOR3P2,MIR5706,RNU6-701P,RP11-950K24.2	S2(3.8)	0
chr5	125492500	125691500	199	5q23.2	0.024	AC010235.1,CTC-339D2.1,RP11-114J13.1	S1(4.9)	0
chr11	48002500	48201500	199	11p11.2	1.183	AC103828.1,MIR3161,PTPRJ	S1(5.2)	0
chr7	25063500	25262500	199	7p15.3	0.074	AC004129.7,AC004129.9,C7orf31,CYCS	S1(5)	0
chr9	125703111	125902500	199	9q33.2-3	1.067	GPR21,MIR600HG,RABGAP1,RP11-123N4.4,RP11-355O1.7,STRBP,Y_RNA:750	S2(3.6)	0
chr7	55085500	55284500	199	7p11.2	4.124	EGFR,EGFR-AS1	S1(5)	0
chr1	112083500	112282462	199	1p13.2	1.263	ADORA3,FAM212B,KRT18P57,RAP1A,RNU6-151P,RP5-836N10.1	S1(5.2)	0
chr6	5067216	5266500	199	6p25.1	0.442	AL162381.1,FARS2,LYRM4,MIR3691,PPP1R3G	S2(4.2)	0
chr8	38964508	39163500	199	8p11.22	0.221	ADAM32,RPL3P10	S1(4.5)	0
chr8	123793500	123991500	198	8q24.13	0.422	AC016405.2,RP11-44N11.1,RP11-557C18.4,ZHX2	S1(4.5)	0
chr15	45997275	46195500	198	15q21.1	0.045	RP11-718O11.1	S2(3.6)	0
chr4	22320500	22518500	198	4p15.2	0.337	GPR125,RP11-17E2.2,snoU13:316	S4(2.3)	0
chr1	222987500	223185500	198	1q41	0.333	DISP1,NDUFB1P2,RP11-452F19.3,snoU13:201	S2(3.9)	0
chrX	85105144	85303500	198	Xq21.2	0.63	CHM,MIR361,Y_RNA:780	S4(1.9)	0
chr16	75301951	75499500	198	16q23.1	0.845	CFDP1,RNU6-758P,RP11-252K23.1,RP11-252K23.2,RP11-77K12.1,RP11-77K12.3,SNORA76:1,TMEM170A	S1(5.3)	0
chr13	113344500	113542500	198	13q34	0.256	AL162711.1,AL356740.1,ATP11A,ATP11A-AS1	S3(3.3)	0
chr7	91568500	91766500	198	7q21.2	0.632	AKAP9,CTB-161K23.1,CYP51A1,LRRD1	S2(4.2)	0
chr6	143069500	143267500	198	6q24.2	1.339	HIVEP2,RP1-67K17.3,RP1-67K17.4,RP11-439L18.2	S1(4.7)	0
chr8	28923500	29121500	198	8p12	0.073	CTD-2647L4.1,CTD-2647L4.5,HMGB1P23,KIF13B,RN7SL781P	S1(4.8)	0
chr10	90145500	90342500	197	10q23.31	0.022	RNLS	S1(4.8)	0
chr18	60790500	60987361	197	18q21.33	0.115	BCL2,RP11-28F1.2,RP11-299P2.1,snoU13:157	S2(3.7)	0
chr4	134931845	135128500	197	4q28.3	0.396	AC096763.1,PABPC4L	S3(2.8)	0
chr11	89027414	89224500	197	11q14.3	0.146	NOX4,TYR	S3(2.8)	0
chr1	54683500	54880500	197	1p32.3	0.778	MRPL37,RP5-997D24.3,SSBP3,SSBP3-AS1	S1(4.7)	0
chr20	34359500	34556532	197	20q11.22-23	0.99	CNBD2,COX7BP2,HIGD1AP16,PHF20,RNU4-40P,RNU6-937P,SCAND1,Y_RNA:385	S1(5.3)	0
chr3	12328500	12525930	197	3p25.2	0.209	AC091492.2,PPARG	S1(4.8)	0
chr18	9101500	9298500	197	18p11.22	2.426	ANKRD12,NDUFV2,RP11-143J12.2,RP11-143J12.3,RP11-21J18.1,RP11-888D10.4,Y_RNA:265,Y_RNA:275,snoU13:151	S1(5.1)	0
chr9	116637500	116834500	197	9q32	1.362	AMBP,ZNF618	S1(4.8)	0
chr8	42751500	42948657	197	8p11.21	1.412	FNTA,HOOK3,RNF170,RNU1-124P,RP11-598P20.5,Y_RNA:722	S2(4.4)	0
chr1	204796500	204992500	196	1q32.1	0.158	NFASC,RP11-494K3.2,SNORD112:30	S1(4.6)	0
chr6	151560500	151756500	196	6q25.1	0.544	AKAP12,HSPA8P15,RMND1,RN7SKP268,RNU6-1247P,RNY4P20,Y_RNA:637,ZBTB2,snoU13:377	S2(4.2)	0
chr7	80357500	80553500	196	7q21.11	2.408	SEMA3C	S1(4.9)	0
chr15	25199500	25395500	196	15q11.2	0.406	PWAR6,RP11-145P16.3,RP11-701H24.10,RP11-701H24.3,RP11-701H24.7,SNHG14:1,SNHG14:2,SNORD108,SNORD109A,SNORD116-1,SNORD116-10,SNORD116-11,SNORD116-12,SNORD116-13,SNORD116-14,SNORD116-15,SNORD116-16,SNORD116-17,SNORD116-18,SNORD116-19,SNORD116-2,SNORD116-20,SNORD116-23,SNORD116-24,SNORD116-25,SNORD116-26,SNORD116-27,SNORD116-29,SNORD116-3,SNORD116-30,SNORD116-5,SNORD116-6,SNORD116-7,SNORD116-8,SNORD1…	S4(1.9)	0
chr2	172096500	172292500	196	2q31.1	0.255	AC008065.1,DCAF17,METTL8	S1(5)	0
chr14	39944043	40140500	196	14q21.1	0.03	RP11-111A21.1	S3(3.4)	0
chr15	81071683	81267500	196	15q25.1	8.306	KIAA1199,MESDC2,MIR549,RP11-351M8.1,RP11-351M8.2	S1(5.2)	0
chr2	75185618	75381491	196	2p12	0.38	MIR5000,POLE4,TACR1	S1(5)	0
chr15	57882500	58077500	195	15q21.3	0.177	GCOM1,MYZAP,POLR2M,RP11-344A16.2	S1(4.6)	0
chr2	201166500	201361500	195	2q33.1	2.665	AC105381.1,KCTD18,SPATS2L,Y_RNA:423	S1(4.8)	0
chr12	133338474	133533500	195	12q24.33	1.03	CHFR,GOLGA3,RNU6-327P,RP11-46H11.12,RP11-46H11.2,RP11-46H11.3,RPS11P5,ZNF605	S2(3.5)	0
chr3	192445376	192640500	195	3q29	2.664	FGF12,MB21D2,RNU1-20P	S2(3.5)	0
chr15	25914500	26109500	195	15q12	1.949	ATP10A,MIR4715,RNA5SP390,Y_RNA:162	S2(3.5)	0
chr2	192109500	192304500	195	2q32.3	4.658	AC092614.2,MYO1B,RNU6-1045P	S1(5.2)	0
chr3	8811314	9006500	195	3p25.3	1.05	CAV3,RAD18,SNORA43:5,hsa-mir-548ba	S1(5.1)	0
chr3	160821500	161016500	195	3q26.1	0.4	B3GALNT1,NMD3,RP11-479I16.2	S3(3)	0
chr4	17829500	18024500	195	4p15.31	1.241	KRT18P63,LCORL,NCAPG	S3(3)	0
chr4	74979500	75174189	195	4q13.3	0.175	AC093677.1,MTHFD2L	S1(4.8)	0
chr7	17791500	17985500	194	7p21.1	1.061	SNX13	S2(3.9)	0
chr6	111611500	111805500	194	6q21	2.728	BRD7P4,FCF1P5,REV3L,REV3L-IT1,RP5-1112D6.7,RP5-1112D6.8,TRAF3IP2-AS1	S1(4.8)	0
chr5	109024500	109218882	194	5q21.3	1.052	CTC-287O8.1,MAN2A1,RN7SKP230	S3(2.8)	0
chr3	101039404	101233500	194	3q12.3	0.723	RP11-144C15.1,SENP7,Y_RNA:472,ZNF90P1,snoU13:278	S2(4.1)	0
chr3	49976500	50170500	194	3p21.31	1.42	RBM5,RBM6,RP11-493K19.3	G1(5.5)	0
chr9	4983500	5177500	194	9p24.1	0.671	AL161450.1,IGHEP2,INSL6,JAK2,MTND1P11,MTND4P14,MTND5P14,MTND6P5,RP11-39K24.12,RP11-39K24.13,RP11-39K24.14,RP11-39K24.2,RP11-39K24.4,RP11-39K24.7,RP11-39K24.9	S2(4)	0
chr10	123494500	123688500	194	10q26.13	0.508	ATE1,RP11-500G22.2,RP11-78A18.2,Y_RNA:3	S2(4.2)	0
chr12	25609500	25802500	193	12p12.1	0.044	IFLTD1,RP11-685B13.2	S1(4.8)	0
chr5	122179133	122371965	193	5q23.2	0.794	PPIC,RN7SL689P,SNX24,snoU13:345	S3(3.1)	0
chr13	45693500	45886500	193	13q14.12-13	0.989	7SK:1,AL138963.1,GTF2F2,KCTD4,RNU6-69P,RP11-290D2.5	S1(5.2)	0
chr3	97482500	97675500	193	3q11.2	0.391	ARL6,CRYBG3:1,CRYBG3:2,MINA	S4(2.2)	0
chr14	56584500	56777597	193	14q22.3	0.27	PELI2,RP11-930O11.2	S3(2.9)	0
chr13	99851500	100044500	193	13q32.3	0.916	GPR18,GPR183,H2AFZP3,HMGB3P4,MIR623,RN7SKP9,UBAC2,UBAC2-AS1	S1(4.5)	0
chr11	106695500	106888500	193	11q22.3	0.023	GUCY1A2,RP11-819M15.1	S3(2.8)	0
chr4	154072500	154265800	193	4q31.3	0.533	ANXA2P1,RNU6-1196P,TRIM2,Y_RNA:549	S1(5)	0
chr19	2509500	2702707	193	19p13.3	0.02	CTC-265F19.1,CTC-265F19.2,CTC-265F19.3,GNG7,TCEB1P28	S1(5.2)	0
chr12	12228500	12421500	193	12p13.2	0.885	BCL2L14,LRP6,RNU6-545P,RP11-267J23.1,RP11-267J23.4,RP11-757G14.3	S2(4.4)	0
chr5	49961500	50154500	193	5q11.1	0.547	PARP8	S4(1.6)	0
chr12	96629500	96822500	193	12q23.1	1.655	CDK17,ELK3,RN7SKP11,RNU4-24P,RP11-117N2.2,RP11-510I5.4	S1(5.3)	0
chr2	183710500	183903500	193	2q32.1	1.919	FRZB,NCKAP1,RNU6-1122P,Y_RNA:453	S2(4)	0
chrX	66763500	66955500	192	Xq12	0.202	AR	S3(2.9)	0
chr9	124359500	124551500	192	9q33.2	0.441	DAB2IP	S1(5.1)	0
chr6	90348472	90540500	192	6q15	0.477	CASP8AP2,DNAJC19P6,MDN1,RP1-122O8.7,RP11-63K6.1,snoU13:373	S3(3.3)	0
chr6	4776500	4968500	192	6p25.1	1.271	CDYL	S2(4.2)	0
chr20	33680674	33872788	192	20q11.22	0.454	AL121753.1,EDEM2,EIF6,MMP24,MMP24-AS1,MT1P3,PROCR,RNA5SP483,RP4-614O4.11,RP4-614O4.12,SNORD56:4	G1(5.5)	0
chr7	77428121	77619733	192	7q11-21	1.165	PHTF2,RP5-1185I7.1,Y_RNA:672	S1(4.7)	0
chr14	80662500	80854100	192	14q31.1	0.134	DIO2,DIO2-AS1	S2(4.1)	0
chr3	106959488	107151500	192	3q13.12	0.028	AC063944.1,CCDC54,LINC00883,RP11-115H18.1,RP11-446H18.1,RP11-446H18.5,RP11-446H18.6	S2(3.9)	0
chr4	79696500	79888500	192	4q21.21	1.255	BMP2K,MIR5096,PAQR3,RN7SL127P,RP11-109G23.3	S1(4.5)	0
chr13	97873500	98065500	192	13q32.1	5.267	MBNL2,RNA5SP37	S2(4.2)	0
chr9	129088500	129280500	192	9q33.3	0.589	MVB12B,NRON,RP11-205K6.1,SNORD116:3	S2(3.7)	0
chr4	187461500	187653500	192	4q35.2	4.279	FAT1,MTNR1A,RP11-215A19.2	S3(3.2)	0
chr6	126307575	126498338	191	6q22.32	0.438	TRMT11	S2(4.3)	0
chr2	232062500	232253686	191	2q37.1	6.072	AC018738.2,ARMC9,MIR4777	G1(5.5)	0
chr7	135004500	135195500	191	7q33	1.032	CNOT4,SDHDP2	S2(4.2)	0
chr2	171827500	172018500	191	2q31.1	1.832	TLK1,snoU13:240	S1(4.9)	0
chr12	57634498	57825500	191	12q13.3	0.686	AC126614.1,R3HDM2,RNU6-879P,RP11-123K3.4,RP11-756H6.1,STAC3	G1(5.5)	0
chr11	43701500	43892500	191	11p11.2	0.926	HSD17B12,RP11-472I20.1,RP11-472I20.2,RP11-613D13.5	S2(4)	0
chr2	73150500	73341500	191	2p13.2	1.288	EMX1,RAB11FIP5,RP11-44N22.3,SFXN5	S1(4.9)	0
chr3	138363536	138554500	191	3q22.3	0.536	EEF1A1P25,GAPDHP39,PIK3CB,RPL23AP40	S2(4.2)	0
chr8	68066500	68257500	191	8q13.2	1.431	ARFGEF1,CSPP1,RP11-7F18.2	S3(3.2)	0
chr14	92979500	93169500	190	14q32.12	0.977	RIN3	S1(4.8)	0
chr4	126231500	126421500	190	4q28.1	0.926	FAT4,Y_RNA:529	S3(3)	0
chr13	50510626	50700500	190	13q14.2	1.237	AL136123.1,DLEU1,DLEU2,KCNRG,MIR16-1,MIR3613,RPL18P10,TRIM13	S2(4.3)	0
chr4	73935472	74125500	190	4q13.3	2.499	ANKRD17,HMGA1P2,RP11-692D12.1	S3(3.2)	0
chr14	73740789	73930500	190	14q24.2-3	1.181	NUMB,PAPLN,RP1-240K6.3	S1(5.3)	0
chr17	25782500	25972500	190	17q11.1-2	0.181	AC015688.3,ITM2BP1,KSR1,LGALS9,RP11-19P22.8,RP11-720N19.1,RP11-720N19.2	S2(3.8)	0
chr6	116575335	116765322	190	6q22.1	0.646	DSE,RP1-93H18.1,RP3-486I3.4,RP3-486I3.7,TSPYL1	S1(4.9)	0
chr9	13090500	13280500	190	9p23	0.704	MPDZ,RP11-272P10.2	S3(2.7)	0
chr14	63821500	64011500	190	14q23.2	1.141	CTD-2302E22.4,PPP2R5E,RN7SL540P,RNU6-852P,SCARNA20:2	S2(4.2)	0
chr14	93392500	93582500	190	14q32.12	0.471	CHGA,ITPK1,ITPK1-AS1	S2(3.9)	0
chr13	60970500	61160500	190	13q21.2	0.504	AL354764.1,TDRD3	S3(2.9)	0
chr8	125551699	125741500	190	8q24.13	0.252	MTSS1,NDUFB9,RP11-532M24.1	S2(3.8)	0
chr3	135683500	135873500	190	3q22.2-3	1.734	MSL2,PPP2R3A,RP11-305O4.2,RP11-305O4.3	S1(4.7)	0
chr4	146672500	146861500	189	4q31.21-22	1.366	C4orf51,RP11-181K12.2,ZNF827	S2(4.2)	0
chr8	79716500	79905500	189	8q21.12	0.243	IL7,RP11-79H23.3	S3(3.4)	0
chr20	3450500	3639500	189	20p13	0.592	AL109805.1,ATRN,SF3A3P1	S1(5.2)	0
chr1	10269500	10458648	189	1p36.22	0.961	KIF1B,MIR1273D,RN7SL721P,RN7SL731P,RNU6-37P	S1(5.3)	0
chr9	72658500	72847500	189	9q21.12	0.477	MAMDC2,MAMDC2-AS1,RNU2-5P,RPL24P8,SMC5-AS1	S1(5)	0
chr9	133589332	133778500	189	9q34.12	1.194	ABL1,FIBCD1,QRFP,RP11-57C19.6	S1(5.2)	0
chr14	89070500	89259500	189	14q31.3	0.134	EML5,ZC3H14	S2(3.9)	0
chr17	693765	883010	189	17p13.3	0.86	NXN,RNMTL1,RP11-356I18.1,RP11-676J12.6,RP11-676J12.7	S1(5.1)	0
chr7	80122500	80311500	189	7q21.11	0.032	AC073850.6,CD36,GNAT3	S1(4.9)	0
chr21	16254296	16442500	188	21q11-21	2.224	AF127577.10,AF127577.11,AF127577.12,AF127577.8,NRIP1	S2(3.8)	0
chr3	64066500	64254500	188	3p14.1	1.193	LINC00994,PRDX3P4,PRICKLE2,PRICKLE2-AS1,PRICKLE2-AS2,PRICKLE2-AS3,RP11-129B22.1	S1(4.9)	0
chr2	67911209	68099500	188	2p14	0.044	AC010987.6	S1(4.6)	0
chr12	81148500	81336500	188	12q21.31	0.857	ACSS3,LIN7A,MIR617,MIR618,RP11-299A16.1,RP11-540D4.3	S2(3.8)	0
chr5	34651500	34839318	188	5p13.2	2.562	CTD-2024P10.1,CTD-2024P10.2,CTD-2517O10.6,RAI14,TTC23L	S1(5.1)	0
chr12	26106500	26294500	188	12p12.1	1.486	BHLHE41,RASSF8,RASSF8-AS1,RP11-283G6.3,SSPN	S1(4.8)	0
chr12	79897142	80085500	188	12q21.2	1.473	PAWR,RN7SL696P,RP1-78O14.1,RP11-359M6.1,RP11-359M6.3,RP11-530C5.1	S1(4.8)	0
chr22	42551007	42739500	188	22q13.2	0.591	CTA-989H11.1,TCF20,Z83851.3,Z83851.4	S1(4.6)	0
chr14	59654500	59842500	188	14q23.1	0.269	DAAM1	S2(4.3)	0
chr2	233561500	233749500	188	2q37.1	1.338	AC064852.4,AC064852.5,C2orf82,GIGYF2,KCNJ13,NGEF,RNU6-107P,Y_RNA:432	S2(4)	0
chr3	141978500	142166904	188	3q23	0.776	AC109992.1,RNU1-100P,RNU6-1294P,XRN1	S2(4.2)	0
chr15	57668500	57856500	188	15q21.3	0.06	CGNL1,CTD-2515H24.1,CTD-2515H24.3,CTD-2515H24.4,RNU6-844P	S1(4.8)	0
chr1	65920500	66108500	188	1p31.3	0.142	LEPR,RP11-430H12.2,RP4-630A11.3,snoU13:188	S1(4.5)	0
chr14	97262500	97450500	188	14q32.2	0.381	AL133168.3,LINC00618,VRK1	S4(2.2)	0
chr22	27067500	27254596	187	22q12.1	0.441	CTA-211A9.5,CTA-373H7.7,MIAT	S1(4.5)	0
chr2	74432500	74619500	187	2p13.1	0.332	DCTN1,DCTN1-AS1,KRT18P26,MTHFD2,NECAP1P2,RNU6-542P,RP11-287D1.3,SLC4A5,TAF13P2	S1(5)	0
chr3	124907500	125094500	187	3q21.2	1.595	DUTP1,RP11-775J23.2,SLC12A8,ZNF148	G1(5.5)	0
chr5	112042500	112229029	187	5q22.2	1.207	APC,CBX3P3,CTC-487M23.8,CTC-554D6.1,REEP5,RNU6-482P,SRP19,XBP1P1,ZRSR1	S1(4.7)	0
chr7	114557500	114744500	187	7q31.1-2	0.943	AC068610.3,AC068610.5,MDFIC	S2(3.8)	0
chr12	102270500	102457132	187	12q23.2	0.913	CCDC53,DRAM1,RP11-512N21.1,RP11-512N21.3,RP11-554E23.2,RP11-554E23.3	S1(4.7)	0
chr11	65837833	66024764	187	11q13.1-2	1.039	PACS1,RP11-755F10.1,snoU13:28	G1(5.6)	0
chr2	69869500	70056773	187	2p13.3	0.571	AAK1,AC092431.3,ANXA4,snoU13:247	G1(5.5)	0
chr2	222250500	222437500	187	2q36.1	0.92	AC079834.2,CTD-2308L22.1,EPHA4,TMEM256P2	S4(2.3)	0
chr9	134429500	134616500	187	9q34.13	1.11	RAPGEF1,RN7SL328P	S1(5)	0
chr7	39988500	40174574	186	7p14.1	1.001	CDK13,MPLKIP,RP11-467D6.1,RP5-1147A1.1,RP5-1147A1.2,Y_RNA:687	S2(4)	0
chr10	126666500	126852500	186	10q26.13	2.404	CTBP2,MIR4296,ZRANB1	S2(4.4)	0
chr2	189858500	190044605	186	2q32.2	5.66	AC133106.2,COL3A1,COL5A2,MIR3129	S1(5.3)	0
chrX	49686500	49872500	186	Xp11.22-23	0.134	AF222686.1,CLCN5,MIR188,MIR362,MIR500A,MIR500B,MIR501,MIR502,MIR532,MIR660,RNU6-421P	S4(2)	0
chr9	91609500	91795500	186	9q22.1	0.183	C9orf47,RP11-82L18.2,RP11-82L18.4,S1PR3,SHC3	S2(4)	0
chr11	12398500	12584500	186	11p15.3	3.372	PARVA,RP11-51B23.3	G1(5.6)	0
chr13	41055143	41241500	186	13q14.11	0.607	AL133318.1,FOXO1,RLIMP1	S2(3.5)	0
chr7	151248500	151434500	186	7q36.1	0.284	PRKAG2	S1(5.3)	0
chr14	103058500	103243812	185	14q32.31-32	1.027	RCOR1,RP11-661D19.1,RP11-661D19.3,Y_RNA:128	S1(5.4)	0
chr2	227699500	227884500	185	2q36.3	0.447	COL4A4,RHBDD1,SNORA48:9	S2(4.1)	0
chr20	36321500	36506500	185	20q11.23	0.581	CTNNBL1	S1(4.5)	0
chr18	32288500	32473500	185	18q12.1	0.035	AC068506.1,DTNA,RP11-138H11.1	S3(3.2)	0
chr11	101981191	102165790	185	11q22.1-2	2.149	RP11-864G5.3,YAP1	S1(5.4)	0
chr8	23131500	23316500	185	8p21.2-3	3.994	CTC-756D1.2,ENTPD4,LOXL2,R3HCC1,RP11-177H13.2	G1(5.5)	0
chr9	70970500	71155500	185	9q21.11	0.246	PGM5,PGM5-AS1,RP11-88I18.2,RP11-88I18.3,TMEM252	S3(2.7)	0
chr12	121834500	122019500	185	12q24.31	0.514	ANAPC5,KDM2B,RNF34,RP11-711D18.2,RP13-941N14.1	S1(5.4)	0
chr2	109150500	109335936	185	2q12.3	0.89	AC010095.5,AC010095.6,AC010095.7,AC012487.2,LIMS1	S1(4.7)	0
chr19	7110500	7295500	185	19p13.2	0.18	AC010311.1,INSR	S3(3.2)	0
chr5	171249500	171434500	185	5q35.1	1.593	FBXW11	S1(4.9)	0
chr8	130844500	131029375	185	8q24.21	1.128	FAM49B,MIR5194,RNU7-181P,RP11-473O4.1,RP11-473O4.3,RP11-473O4.4,RP11-473O4.5,SNORA25:19	S1(5.3)	0
chr8	91447500	91632298	185	8q21.3	0.066	AB015752.3,AF070718.1,LINC00534,LINC01030,RNA5SP273	S2(3.5)	0
chr11	44117098	44302500	185	11p11.2	0.735	ALX4,EXT2	S2(3.8)	0
chr5	77760500	77945500	185	5q14.1	0.733	HMGB1P21,LHFPL2,SCAMP1	S1(4.9)	0
chr5	97020500	97205500	185	5q15	0.019	RP11-72K17.1	S2(3.8)	0
chr9	82181500	82365500	184	9q21.31	18.95	RP11-79D8.2,TLE4	S3(3.1)	0
chr3	99352500	99536677	184	3q12.1	2.167	AC055723.1,COL8A1,RP11-383I23.2	S1(4.8)	0
chr6	147524500	147708799	184	6q24.3	1.967	STXBP5,STXBP5-AS1	S2(3.9)	0
chr3	66270500	66454500	184	3p14.1	0.577	LRIG1,RN7SL482P,RNU6-787P,SLC25A26	S1(4.8)	0
chr7	124632500	124816500	184	7q31.33	0.072	EEF1GP1,RP11-3B12.1,RP11-3B12.2,RP11-3B12.4,RP11-3B12.5	G2(1.4)	0
chr18	317366	501500	184	18p11.32	0.086	COLEC12,RP11-720L2.2,RP11-720L2.4	S1(5.2)	0
chr2	64812500	64996500	184	2p14	0.808	AC007365.1,AC007365.3,AC007365.4,AFTPH,SERTAD2	S1(5.3)	0
chr6	154648500	154832500	184	6q25.2	0.606	CNKSR3,IPCEF1	S2(4)	0
chr5	5145500	5329500	184	5p15.32	0.058	ADAMTS16,CTD-2297D10.1	S4(2.2)	0
chr14	91525500	91709102	184	14q32.11	0.349	C14orf159,GPR68,RN7SL506P,RNU7-30P,RPS6KA5,SNORA11B	S2(3.7)	0
chr13	26827500	27011500	184	13q12.13	0.628	CDK8	S2(3.6)	0
chr12	93144500	93328500	184	12q22	1.367	EEA1,HNRNPA1P50,PLEKHG7,RP11-603K19.1	S1(4.5)	0
chr1	117908500	118092036	184	1p12	0.847	MAN1A2	S2(3.9)	0
chr12	114221500	114405500	184	12q24.13-21	0.725	RBM19,RP11-438N16.2,RP11-780K2.1	S3(3.3)	0
chr17	51500	235500	184	17p13.3	0.056	RP11-1260E13.1,RP11-1260E13.2,RP11-1260E13.3,RP11-1260E13.4,RPH3AL	S2(4.4)	0
chr14	62393500	62577592	184	14q23.2	0.122	CTD-2277K2.1,RP11-355I22.2,RP11-355I22.5,SYT16	S2(3.8)	0
chr15	43029324	43213007	184	15q15.2	0.382	CTD-2036P10.3,KRT8P50,TTBK2	S1(5.3)	0
chr12	96001500	96184930	183	12q22	2.321	NTN4,PGAM1P5,Y_RNA:99	S1(4.8)	0
chr16	69796208	69979500	183	16q22.1	0.747	MIR140,SNORA62:2,WWP2,Y_RNA:204	G1(5.6)	0
chr1	51802500	51985500	183	1p32.3	0.962	EPS15,RNU6-877P,RP11-191G24.1,RP11-253A20.1,RP11-275F13.3,TTC39A	S1(5.2)	0
chr2	207307500	207490500	183	2q33.3	0.055	AC010731.2,ADAM23	S3(2.6)	0
chr2	101435500	101618176	183	2q11.2	0.472	AC016738.3,AC016738.4,AC092168.2,NPAS2	S1(5.3)	0
chr11	77348850	77532063	183	11q14.1	1.243	AP000580.1,FTH1P16,RSF1,RSF1-IT1,RSF1-IT2,Y_RNA:52	S1(5.1)	0
chr1	193090500	193273874	183	1q31.2	1.851	B3GALT2,CDC73,MIR1278	S2(4.1)	0
chr2	99770500	99953815	183	2q11.2	0.197	C2orf15,LIPT1,LYG1,LYG2,MITD1,MRPL30,TSGA10,TXNDC9	S2(3.5)	0
chr15	51733500	51916500	183	15q21.2	0.285	AC020892.1,DMXL2,RP11-707P17.1,RP11-707P17.2	S2(4.2)	0
chr11	12115542	12297626	182	11p15.3	4.165	MICAL2,RP11-265D17.2	G1(5.6)	0
chr2	85360500	85542163	182	2p11.2	0.903	AC093162.1,AC093162.3,RNU6-674P,TCF7L1,TCF7L1-IT1	S1(5.3)	0
chr2	67443500	67625500	182	2p14	0.041	AC023115.1,AC023115.2,AC023115.4,ETAA1	S2(4.2)	0
chr1	143914500	144146807	182	1q21.1	0.18	RP11-289H16.1,RP3-365I19.2,SRGAP2B	S2(4.3)	0
chr10	104678049	104860500	182	10q24.32	0.385	CNNM2,NT5C2	S1(5)	0
chrX	10407500	10589500	182	Xp22.2	0.906	MID1,RNU6-800P	S1(4.7)	0
chr18	15410500	18692500	182	18p-q	0.122	AC036178.1,ROCK1	S2(4.4)	0
chrX	9753500	9935391	182	Xp22.2	0.063	GPR143,HMGN1P33,RP11-98L4.1,SHROOM2,Y_RNA:805	S2(4.2)	0
chr20	49997500	50179370	182	20q13.2	0.279	MIR3194,NFATC2	S1(4.8)	0
chr15	65903627	66084500	181	15q22.31	0.367	DENND4A,MIR4511,RAB11A,RP11-16E23.3,RP11-16E23.4,SLC24A1,snoU13:100	S1(5)	0
chr2	173419500	173600500	181	2q31.1	0.271	AC018712.2,AC093818.1,PDK1,RAPGEF4,RAPGEF4-AS1,Y_RNA:450,snoU13:241	G1(5.5)	0
chr1	169863408	170044500	181	1q24.2	0.457	AL356475.1,KIFAP3,MRPS10P1,RN7SL269P,RP11-332H17.1	S2(3.6)	0
chr17	67143500	67324500	181	17q24.3	0.367	ABCA10,ABCA5,SNRPGP4	S3(2.6)	0
chr2	74880500	75061107	181	2p12-13	0.118	AC007387.2,RP11-259N19.1,SEMA4F	S1(5.3)	0
chr7	152455500	152636500	181	7q36.1-2	0.241	ACTR3B	S3(2.5)	0
chr1	84542500	84723500	181	1p31.1	0.747	PRKACB,RP11-486G15.1,RP11-486G15.2,RP11-82H13.2	S2(4.3)	0
chr21	38737500	38918500	181	21q22.13	4.124	AP001421.1,AP001437.1,DYRK1A	S2(4.4)	0
chrX	122687500	122868500	181	Xq25	0.94	FERP1,RN7SL29P,RP5-1189B24.1,THOC2,TUBB4AP1	S1(4.9)	0
chr2	178256500	178437500	181	2q31.2	0.809	AC074286.1,AGPS,NFE2L2,TTC30B	S3(3.1)	0
chr21	44899414	45080500	181	21q22.3	0.035	H2BFS,HSF2BP,RPL31P1,RRP1B	S1(5)	0
chr6	34217247	34398500	181	6p21.31	0.791	NUDT3,RP11-513I15.6,RPL35P2,RPS10,RPS10-NUDT3	S1(5.2)	0
chr3	154740500	154921500	181	3q25.2	0.993	MME,MME-AS1	S2(4.2)	0
chr12	111857500	112038500	181	12q24.12	2.268	AC002395.1,ATXN2,RP11-686G8.1,RP11-686G8.2,SH2B3,U7:1	S1(5.4)	0
chr15	56105500	56286500	181	15q21.3	1.109	NEDD4,snoU13:96	S2(4.3)	0
chr12	66213500	66394500	181	12q14.3	7.726	AC090673.1,AC090673.2,HMGA2,RP11-366L20.2,RP11-366L20.3,RPSAP52	G1(5.5)	0
chr16	3414500	3594430	180	16p13.3	0.607	C16orf90,CLUAP1,LA16c-306E5.1,LA16c-306E5.3,MTRNR2L4,NAA60,NLRC3,RP11-433P17.2,RP11-433P17.3,ZNF174,ZNF597,ZSCAN32	S1(4.6)	0
chr21	17101500	17281500	180	21q21.1	1.015	RBPMSLP,USP25	S2(3.5)	0
chr5	126186500	126366500	180	5q23.2	0.55	2014-03-03	S2(4.3)	0
chr22	29279579	29459500	180	22q12.1	0.424	C22orf31,ZNRF3,ZNRF3-AS1,ZNRF3-IT1	S1(5)	0
chr12	80154500	80334500	180	12q21.2-31	3.853	AC073569.1,PPP1R12A,RNA5SP363,RP11-530C5.1,RP11-530C5.2,RP11-84G21.1	S1(4.8)	0
chr10	15233500	15413500	180	10p13	0.544	FAM171A1,RP11-25G10.2	S1(4.9)	0
chrX	107068500	107248500	180	Xq22.3	0.26	MID2,RP6-191P20.3,RP6-191P20.4,TEX13B,Y_RNA:784	S2(3.6)	0
chr1	225666500	225846500	180	1q42.12	1.432	ENAH	S1(4.9)	0
chr7	587500	767500	180	7p22.3	0.064	AC147651.2,AC147651.4,AC147651.5,HEATR2,PRKAR1B	S2(4.4)	0
chr6	163835500	164015500	180	6q26	2.429	QKI,RP5-826L7.1	S4(2.3)	0
chr1	100816500	100995500	179	1p21.2	0.629	AC104457.1,BCAS2P2,CDC14A,RP5-837M10.4	S2(4)	0
chr6	20034500	20213500	179	6p22.3	1.291	MBOAT1,RP1-130G2.1,RP11-239H6.2	S3(2.8)	0
chr2	11306500	11485500	179	2p25.1	2.498	AC018463.4,PQLC3,RNU6-1081P,ROCK2	S1(4.8)	0
chr6	119493500	119672500	179	6q22.31	0.131	MAN1A1,RNU6-194P,RP3-354N19.3	S3(2.7)	0
chr4	128981500	129160500	179	4q28.2	0.381	FOSL1P1,LARP1B,RP11-214O14.1	S1(4.8)	0
chr3	110612323	110791500	179	3q13.13	0.064	PVRL3,PVRL3-AS1	S2(3.5)	0
chr7	76177500	76356500	179	7q11.23	0.085	AC004980.1,AC004980.10,AC004980.7,POMZP3,UPK3B	S1(5.2)	0
chr6	108881500	109060500	179	6q21	1.367	FOXO3,SUMO2P8	S1(5)	0
chr8	94924500	95103500	179	8q22.1	0.298	AC105081.1,MIR378D2,PDP1,PSMA2P2,RPL34P18	S1(5.3)	0
chr1	19638640	19817500	179	1p36.13	3.429	CAPZB,PQLC2,RN7SL277P,RN7SL85P	S1(5.4)	0
chr2	186947960	187126646	179	2q32.1	0.284	AC104058.1,RPL23AP35	S4(2.4)	0
chr7	130616965	130795500	179	7q32.3	2.937	MKLN1,MKLN1-AS1,RNU6-1010P,RP11-138A9.2	G1(5.5)	0
chr17	26367500	26546310	179	17q11.2	1.748	AC061975.1,AC061975.9,AC100852.1,AC100852.2,NLK,RPS29P22,Vault:1	S1(4.7)	0
chr20	4804291	4982500	178	20p13	0.487	SLC23A2,SNORA31:11,snoU13:212	S1(4.7)	0
chr9	132639500	132817500	178	9q34.11	0.519	FNBP1,GPR107,RP11-138E2.1,RP11-409K20.6,RP11-409K20.7,USP20	G1(5.5)	0
chr12	27671500	27849427	178	12p11.22-23	2.304	PPFIBP1,RP11-1060J15.3,RP11-1060J15.4,RP11-709A23.1,RP11-709A23.2	S1(5.3)	0
chr5	14694500	14872500	178	5p15.2	0.812	ANKH,CTB-40H15.4,FAM105B,MIR4637,RBBP4P1	S1(5)	0
chr12	94676620	94854500	178	12q22	0.283	CCDC41,PLXNC1,RBMS2P1,RN7SL330P	S2(3.5)	0
chr4	144256500	144434615	178	4q31.21	0.625	AC097658.1,GAB1,MIR3139,RP11-364L4.1,RP11-58H15.1,RP11-58H15.3	S3(3.4)	0
chr1	15250500	15428500	178	1p36.21	0.765	KAZN	S3(3.1)	0
chr13	28711500	28889500	178	13q12.2	1.77	EEF1A1P3,FLT1,PAN3,PAN3-AS1,RNU6-82P	S1(4.7)	0
chr14	76617500	76795500	178	14q24.3	0.92	ESRRB,GPATCH2L,RP11-361H10.3,RP11-516J2.1	S3(3.3)	0
chrX	149107500	149285500	178	Xq28	0.146	LINC00894,RP11-49C9.2	S1(5)	0
chr8	28746500	28924795	178	8p12-21	0.799	CTD-2647L4.4,HMBOX1,HMBOX1-IT1,INTS9,RNA5SP260	S1(4.7)	0
chr10	126149500	126327500	178	10q26.13	0.121	FAM53B,LHPP,RP11-12J10.3,RPS10P18	S1(4.5)	0
chr3	150086500	150264464	178	3q25.1	2.53	SERP1,TSC22D2	S1(5.4)	0
chr15	41231500	41409500	178	15q15.1	1.066	CHAC1,CYCSP2,INO80,ISCA1P4,RP11-540O11.4,RP11-540O11.6,RP11-540O11.7	S1(5.3)	0
chr2	96481963	96658500	177	2q11.1	0.095	ANKRD36C	S2(4.2)	0
chr4	83542590	83720010	177	4q21.22	0.982	MIR575,RP11-57B24.1,RP11-57B24.2,SCD5	S1(5)	0
chr3	156506500	156683500	177	3q25.31	0.071	LEKR1,LINC00886,PA2G4P4	S1(5.3)	0
chr5	52082500	52259500	177	5q11.2	0.596	CTD-2175A23.1,CTD-2207L17.1,CTD-2207L17.2,CTD-2288O8.1,ITGA1,PELO	S1(5.2)	0
chr1	52082500	52259636	177	1p32.3	1.238	GAPDHP51,NRD1,OSBPL9,SLC25A6P3,SNORA26:3	S1(5.4)	0
chr17	17584500	17761582	177	17p11.2	1.452	MIR33B,RAI1,RAI1-AS1,RP1-253P7.1,SMCR5,SREBF1,TOM1L2	G1(5.5)	0
chr17	49022074	49199500	177	17q21.33	1.174	RP11-481C4.1,RP11-700H6.2,SPAG9,snoU13:141	S1(5.2)	0
chr1	89148500	89325500	177	1p22.2	1.309	GTF2B,PKN2,RNU6-125P,RP11-76N22.2,TCEB1P19	S3(3.3)	0
chr2	70138500	70315500	177	2p13.3	0.206	ASPRV1,MXD1,PCBP1,PCBP1-AS1,RN7SL470P,snoU13:248,snoU13:249	S1(5.4)	0
chr13	110783500	110960500	177	13q34	1.506	COL4A1,COL4A2	S1(5.1)	0
chr10	123871500	124048500	177	10q26.13	0.988	BTBD16,TACC2	S2(3.7)	0
chr19	12486500	12663500	177	19p13.2	0.381	CTD-2192J16.11,CTD-2192J16.20,CTD-2192J16.21,CTD-3105H18.10,CTD-3105H18.11,CTD-3105H18.14,CTD-3105H18.16,CTD-3105H18.18,CTD-3105H18.4,CTD-3105H18.7,CTD-3105H18.8,CTD-3105H18.9,PPIAP20,ZNF443,ZNF564,ZNF709,ZNF799	S2(4)	0
chr20	46129500	46306644	177	20q13.12	1.575	AL021394.1,NCOA3,RP5-1049G16.4,SULF2	S1(4.8)	0
chr2	191032500	191209500	177	2q32.2	0.426	C2orf88,HIBCH,INPP1	S2(4.4)	0
chr17	27716500	27893069	177	17q11.2	1.263	ABHD15,MIR4523:1,MIR4523:2,RNU6-1034P,RNU6-711P,RP11-296K13.4,RP11-68I3.2,TAOK1	G1(5.5)	0
chr5	65016500	65193500	177	5q12.3	0.638	CTD-2353N24.1,NLN,SGTB	G1(5.6)	0
chr3	119011500	119187784	176	3q13.33	0.611	ARHGAP31,ARHGAP31-AS1,RNU6-1127P,RPS26P21,TMEM39A	S1(4.6)	0
chr18	23805500	23981500	176	18q11.2	0.059	FAM60BP,RNU6-1289P,RP11-107K17.2,RP11-25D3.1,TAF4B,U3:24	S3(3)	0
chr14	58894102	59070500	176	14q23.1	0.401	HNRNPCP1,HSBP1P1,KIAA0586,RPL9P5,TIMM9,Y_RNA:136	S2(4.2)	0
chr4	26859299	27035500	176	4p15.2	0.323	RP11-293A21.1,RP11-293A21.2,STIM2	S2(3.9)	0
chr4	77543500	77719500	176	4q21.1	2.397	AC107072.2,RP11-359D14.2,RP11-359D14.3,SHROOM3	G1(5.5)	0
chr5	154061500	154237112	176	5q33.2	1.171	CTC-209L16.1,FAXDC2,LARP1,MIR1303,MIR378H,Metazoa_SRP:8,RN7SL439P	S1(4.8)	0
chr6	126101500	126277926	176	6q22.32	0.42	NCOA7,NCOA7-AS1,RN7SKP56	S1(4.6)	0
chrX	34504500	34680500	176	Xp21.1	0.739	RP11-320J16.1,TMEM47	S3(3)	0
chr6	72596500	72772500	176	6q13	0.022	RIMS1	S3(3.2)	0
chr6	17393500	17569500	176	6p22.3	1.747	CAP2,RPL7P26	S1(4.8)	0
chr1	142965500	143290500	175	1q21.1	0.031	MIR3118-2,RP11-782C8.1,RP11-782C8.2,RP11-782C8.3,RP11-782C8.4,RP11-782C8.5,RP11-782C8.6,RP11-782C8.7,RP11-782C8.8	S4(1.7)	0
chr7	98475500	98650500	175	7q22.1	1.004	AC004893.10,AC004893.11,MIR3609,SMURF1,TRRAP,snoU13:413	S2(4.3)	0
chr13	98454500	98629500	175	13q32.2	0.05	IPO5,RP11-383H17.4,RPL7AP61,snoU13:67	S1(4.8)	0
chr9	21417500	21592500	175	9p21.3	1.331	IFNA1,IFNE,IFNWP19,IFNWP2,MIR31,MIR31HG,SNORD39:3	S1(5.2)	0
chr2	196476500	196651500	175	2q32.3	0.578	DNAH7,RNU6-915P,SLC39A10	S2(4.1)	0
chr6	47444500	47619500	175	6p12.3	0.765	CD2AP,RP11-385F7.1,RP11-812I20.2,Y_RNA:627	S3(2.5)	0
chr17	44668034	44843500	175	17q21.31	0.337	NSF,RPS7P11,WNT3	S1(5.3)	0
chr11	120207786	120382500	175	11q23.3	1.695	AP000758.1,ARHGEF12,GRIK4	S2(3.5)	0
chr2	42395500	42569500	174	2p21	0.924	AC083949.1,COX7A2L,EML4	S1(5)	0
chr12	92366500	92540500	174	12q21.33	0.573	BTG1,C12orf79,RP11-796E2.4	S2(3.9)	0
chr1	65712500	65886269	174	1p31.3	1.326	DNAJC6,LEPR,RNU2-15P,RP5-1044H5.1,RP5-1044H5.2	S2(4.2)	0
chr2	239334500	239508500	174	2q37.3	0.704	AC016999.2,AC092619.1,ASB1	S1(5.1)	0
chr15	34157026	34331377	174	15q14	0.74	AVEN,CHRM5,RP11-74D7.1,RYR3	S1(4.5)	0
chr14	90248500	90422500	174	14q32.11	0.134	EFCAB11,RAB42P1,RP11-33N16.3,TDP1	S2(4)	0
chr20	3219836	3393500	174	20p13	1.106	AL117334.1,C20orf194,RN7SL839P,RNU6-1019P,U3:35,UBE2V1P1	S1(5.1)	0
chr4	2069500	2243891	174	4p16.3	0.118	COX6B1P5,HAUS3,NAT8L,POLN,RP11-317B7.2,RP11-317B7.3	S1(5.1)	0
chr3	54934500	55108500	174	3p14.3	0.028	CACNA2D3,CACNA2D3-AS1,LRTM1	S2(4.4)	0
chr3	194991896	195164500	173	3q29	1.133	AC069213.4,ACAP2,ACAP2-IT1,Y_RNA:516	S1(4.5)	0
chr8	98881067	99053953	173	8q22.1-2	0.071	MATN2,RPL30	G1(5.5)	0
chr11	76571500	76744500	173	11q13.5	0.459	ACER3,AP002498.1,CTD-2547H18.1	S1(4.9)	0
chr6	79616500	79789500	173	6q14.1	0.964	AL356776.1,IRAK1BP1,PHIP,RP11-477E3.2	S4(2.3)	0
chr2	120770580	120943500	173	2q14.2	0.227	AC012363.4,EPB41L5	S1(4.8)	0
chr14	59783500	59956500	173	14q23.1	0.327	AL159140.1,DAAM1,GPR135,JKAMP,L3HYPDH,RP11-701B16.2	S2(4.3)	0
chr2	204192941	204365500	173	2q33.2	0.862	ABI2,RAPH1,RP11-363J17.1	S1(5)	0
chr7	18989385	19162500	173	7p21.1	0.768	AC003986.6,AC003986.7,HDAC9,TWIST1	S2(3.6)	0
chr3	136581049	136754500	173	3q22.3	0.81	IL20RB,IL20RB-AS1,NCK1,RP11-85F14.1	S1(4.8)	0
chr6	117783500	117956500	173	6q22.1	1.447	DCBLD1,GOPC,NEPNP	S1(4.8)	0
chr1	78443500	78616500	173	1p31.1	0.783	DNAJB4,FUBP1,GIPC2,RNA5SP22,RNU6-1102P,RP11-386I14.2,RP11-386I14.3,RP11-386I14.4	G1(5.5)	0
chr14	102228500	102401500	173	14q32.31	1.319	CTD-2017C7.1,CTD-2017C7.2,CTD-2017C7.3,PPP2R5C,RNU6-790P	S1(5)	0
chr9	89719500	89892500	173	9q21.33	0.042	C9orf170,SNORA26:11	S2(3.8)	0
chr7	23337500	23510086	173	7p15.3	1.023	AC021876.4,IGF2BP3,MALSU1,RNU7-143P,SNORD65:3	S1(4.9)	0
chr1	35733500	35906500	173	1p34.3	1.233	KIAA0319L,RN7SL503P,RNY5P1,RPL5P4,SNORA62:3,ZMYM4,ZMYM4-AS1	S1(4.6)	0
chr17	65821500	65994500	173	17q24.2	1.258	AC006534.2,BPTF,C17orf58,RN7SL622P,RP11-855A2.3,RP11-855A2.5	S1(4.9)	0
chr4	154387500	154560500	173	4q31.3	0.313	KIAA0922	S2(4.3)	0
chr11	35268500	35441610	173	11p13	0.129	AC090625.1,RP1-68D18.3,RP4-683L5.1,SLC1A2	G1(5.6)	0
chr5	88007500	88180500	173	5q14.3	0.294	CTC-467M3.1,MEF2C,MEF2C-AS1	S3(3)	0
chr11	122525500	122697500	172	11q24.1	1.231	UBASH3B,snoU13:37	G1(5.5)	0
chr2	197503500	197675500	172	2q33.1	0.309	C2orf66,CCDC150,GTF3C3,SCARNA16:4	S1(4.7)	0
chr17	75083500	75255500	172	17q25.2	1.796	AC015815.1,AC015815.2,AC015815.6,AC015815.7,AC015815.8,CYCSP40,LINC00338,RNU4-47P,RP11-285E9.6,SEC14L1	G1(5.5)	0
chr12	106751435	106923500	172	12q23.3	0.559	POLR3B,RP11-144F15.1	S2(3.6)	0
chr14	31755500	31927500	172	14q12	0.657	AL136418.1,CTD-2213F21.2,DTD2,HEATR5A,RP11-176H8.1,RP11-596D21.1	S1(5)	0
chr3	178406500	178578193	172	3q26.32	0.049	KCNMB2,RP11-385J1.2	S3(3.2)	0
chr13	114631817	114903500	172	13q34	1.081	RASA3,RASA3-IT1	S1(5.3)	0
chr4	169760500	169932500	172	4q32.3	0.175	CBR4,PALLD,RNU6-853P,RNY4P17,RP11-483A20.3	S1(5.3)	0
chr2	210864500	211036500	172	2q34	0.351	AC006994.1,AC006994.2,AC006994.3,AC007038.7,KANSL1L,RP11-260M2.1,RPE	S4(2.3)	0
chr18	55303500	55475500	172	18q21.31	4.048	ATP8B1,RNU6-742P,RP11-35G9.3,RP11-35G9.5	S1(5.4)	0
chr12	89747048	89919500	172	12q21.33	0.423	CENPCP1,GALNT4,POC1B,RP11-1109F11.3,RP11-1109F11.5,RP11-734K2.4	S1(5)	0
chr16	12726500	12898500	172	16p13.12	0.792	CPPED1,CTD-2583P5.1,CTD-2583P5.3,MIR4718	S3(3.4)	0
chr8	103254847	103426500	172	8q22.3	2.227	KB-431C1.4,KB-431C1.5,UBR5,snoU13:420	S2(4.1)	0
chr9	36316500	36488500	172	9p13.2	1.058	RNF38	S1(5)	0
chr5	87563500	87735500	172	5q14.3	0.178	CTC-498M16.2,CTC-498M16.3,CTC-498M16.4,RNA5SP187,RPS3AP22,SNORA70:19,TMEM161B,TMEM161B-AS1	S4(1.7)	0
chr5	271735	443272	172	5p15.33	3.442	AHRR,C5orf55,CTD-2083E4.5,CTD-2228K2.1,CTD-2228K2.2,PDCD6	S2(4.3)	0
chr1	228395830	228566500	171	1q42.13	0.164	C1orf145,OBSCN,RP5-1139B12.2,RP5-1139B12.3,RP5-1139B12.4	S2(3.6)	0
chr18	67458500	67629039	171	18q22.2	0.141	CD226,DOK6	S3(3)	0
chr14	56046500	56217500	171	14q22.3	1.336	KTN1,KTN1-AS1,RP11-813I20.2,Y_RNA:134	S2(4.2)	0
chr2	179959500	180130500	171	2q31.2	0.837	SESTD1,snoU13:261	S3(2.5)	0
chr20	42542500	42713500	171	20q13.12	0.995	RN7SL443P,TOX2	S1(4.8)	0
chr9	86153461	86324500	171	9q21.32	1.165	IDNK,RNU4-15P,RP11-522I20.3,UBQLN1	S3(3.3)	0
chr13	111805500	111976500	171	13q34	1.678	ARHGEF7,TEX29	S3(3.3)	0
chr7	27532384	27703500	171	7p15.2	0.797	HIBADH	S1(4.8)	0
chr10	69833500	70004500	171	10q21.3	1.246	ATOH7,HERC4,MYPN,RN7SKP202,RP11-153K11.3	G1(5.5)	0
chr15	75748183	75918810	171	15q24.2	0.843	AC105036.1,CTD-2026K11.3,CTD-2323K18.1,CTD-2323K18.2,CTD-2323K18.3,PTPN9,SNUPN	G1(5.5)	0
chr7	79078500	79249500	171	7q21.11	0.322	AC091813.2,MAGI2,MAGI2-AS3	S1(4.7)	0
chr22	24406500	24577226	171	22q11.23	0.697	CABIN1,KB-318B8.7	S1(5.4)	0
chr9	125420500	125591500	171	9q33.2	0.148	OR1K1,OR1L1,OR1L3,OR1L4,OR1L6,OR5C1,PDCL,SKA2P1,TLK1P1	S2(4.1)	0
chr2	55168500	55339757	171	2p16.1	5.06	AC093165.1,EML6,RNU6-433P,RTN4	G1(5.6)	0
chr4	113206664	113377079	170	4q25	0.419	ALPK1,RTEL1P1,TIFA	S2(4.2)	0
chr1	42631500	42801500	170	1p34.2	1.329	FOXJ3,RP11-223A3.1	S2(4)	0
chr3	57993500	58163500	170	3p14.3	1.379	FLNB,FLNB-AS1	G1(5.5)	0
chr15	100105500	100275500	170	15q26.3	1.314	DKFZP779J2370,LYSMD4,MEF2A,Y_RNA:179	S2(3.5)	0
chr3	189669500	189839500	170	3q28	0.601	LEPREL1,LEPREL1-AS1,MTAPP2,RN7SL486P	S1(4.9)	0
chr5	60458301	60628500	170	5q12.1	0.304	CTC-436P18.1,CTC-436P18.3,ZSWIM6	S1(4.8)	0
chr3	51571500	51741085	170	3p21.2	0.803	RAD54L2,RNA5SP132,RNU6ATAC29P,TEX264	S2(4.2)	0
chr1	74662500	74832500	170	1p31.1	0.085	FPGT,FPGT-TNNI3K,LRRIQ3,RP11-439H8.4,TNNI3K	S4(1.6)	0
chr5	176560500	176730774	170	5q35.2-3	1.388	CTD-2301A4.3,CTD-2301A4.5,MXD3,NSD1,RAB24	S1(5.2)	0
chrY	14813159	14983500	170	Yq11.21	1.397	CDY4P,USP9Y	NULL	0
chr4	3076407	3246095	170	4p16.3	1.08	HTT	S1(4.9)	0
chr4	71767500	71936500	169	4q13.3	1.064	DCK,MOB1B	S1(4.6)	0
chr18	9703500	9872500	169	18p11.22	1.125	RAB31,RN7SL862P,RNA5SP449,RP11-474N24.2,RP11-692N5.2	G1(5.5)	0
chr5	121296500	121465207	169	5q23.1-2	0.402	CTC-441N14.2,LOX,SRFBP1	S1(4.9)	0
chr9	102697500	102866500	169	9q31.1	0.729	ERP44,INVS,RN7SL75P,STX17,UPF3AP3	S2(4.2)	0
chrX	53546500	53715500	169	Xp11.22	1.698	HUWE1,MIR98,MIRLET7F2	S1(4.7)	0
chr13	24295500	24464500	169	13q12.12	0.299	AL139080.1,C1QTNF9B-AS1,MIPEP,MTCO3P2	S1(4.5)	0
chr9	74262500	74431606	169	9q21.13	1.675	RP11-409O11.3,TMEM2	S2(4)	0
chr6	142621500	142790500	169	6q24.1	0.233	GPR126	S1(4.7)	0
chrX	102024088	102192199	168	Xq22.1	0.424	LINC00630,LL0XNC01-237H1.2,MTND1P32,MTND2P2,MTND4P32,MTND5P26,RP11-522L3.11,RP11-522L3.3,RP11-522L3.4,RP11-522L3.5,RP11-522L3.6,RP11-522L3.9	S2(4.1)	0
chr12	49760500	49928500	168	12q13.12	0.668	RP11-161H23.10,RP11-161H23.8,SPATS2	S1(5.4)	0
chr12	123466196	123634562	168	12q24.31	0.112	ARL6IP4,MIR4304,PITPNM2,RN7SL133P,RP11-197N18.2,RP11-197N18.7	G1(5.5)	0
chr2	157291500	157459500	168	2q24.1	0.806	AC011308.1,GPD2	S3(3.2)	0
chr20	32076500	32244892	168	20q11.21-22	0.677	CBFA2T2	S1(5)	0
chr15	58874500	59042177	168	15q21.3	1.288	ADAM10,RN7SKP95,RP11-123C21.1,RP11-123C21.2,RP11-50C13.1,snoU13:98	S1(4.7)	0
chr9	116917500	117085500	168	9q32	0.785	COL27A1,MIR455,ORM1	S1(5.3)	0
chr12	62652500	62820500	168	12q14.1	1.489	FAM19A2,RNU6-595P,USP15	S2(4)	0
chr4	169239958	169407500	168	4q32.3	0.426	DDX60L,SNORA51:7	S1(5)	0
chr15	65116500	65284500	168	15q22.31	0.626	AC069368.3,ANKDD1A,PIF1,PLEKHO2,RN7SL348P,SPG21	S1(5.4)	0
chr12	14513500	14681500	168	12p13.1	1.339	ATF7IP,PLBD1,RPL30P11	S4(2.3)	0
chr12	47473500	47641906	168	12q13.11	0.63	AMIGO2,MIR4698,PCED1B,PCED1B-AS1,RP11-23J18.1,RP11-493L12.3	S1(4.9)	0
chr3	45428500	45596885	168	3p21.31	0.745	LARS2,LARS2-AS1	S1(5.1)	0
chr1	17865500	18032500	167	1p36.13	0.936	ARHGEF10L	S2(4.2)	0
chr5	142617500	142784500	167	5q31.3	3.36	NR3C1,RP11-278J6.1	S1(5)	0
chr15	43232556	43399500	167	15q15.2	0.807	EPB42,UBR1	S1(5)	0
chr1	44654500	44821500	167	1p34.1	0.608	AL390776.1,DMAP1,ERI3,ERI3-IT1,RP5-891H21.5	S1(4.6)	0
chr7	2717500	2884500	167	7p22.2-3	1.115	AC006028.11,AMZ1,GNA12	S1(5.1)	0
chr10	71560500	71727500	167	10q22.1	0.901	AC025426.1,AL138925.1,COL13A1	S1(4.8)	0
chr22	32149500	32316500	167	22q12.2-3	0.367	CTA-440B3.1,DEPDC5,RN7SL20P,RNU6-201P,RP1-180M12.1	S1(5.1)	0
chr2	8977760	9144500	167	2p25.1	0.391	MBOAT2,snoU13:252	S1(4.7)	0
chrX	70586113	70752932	167	Xq13.1	0.476	AL590762.10,AL590762.11,AL590763.5,INGX,TAF1,Y_RNA:802,snoU13:465	S1(5.1)	0
chrX	55933500	56100756	167	Xp11.21	0.214	RP11-54I5.1,RP13-188A5.1	S4(1.6)	0
chr15	64197500	64364232	167	15q22.31	0.26	DAPK2,RP11-111E14.1	S1(5.4)	0
chr7	138499500	138666500	167	7q34	0.61	KIAA1549,RNU6-1272P,TMEM213	S1(4.6)	0
chr7	32602500	32769500	167	7p14.3	0.075	AVL9,DPY19L1P1,ZNRF2P1	S1(4.5)	0
chrX	46452500	46619500	167	Xp11.23	0.416	CHST7,PGAM1P7,RP11-198M15.1,SLC9A7,YBX1P8	S1(5.4)	0
chr4	39812500	39979500	167	4p14	1.411	PABPC1P1,PDS5A,RNA5SP159,RP11-333E13.2,TCEB1P33	S1(5)	0
chr3	33318500	33485500	167	3p22.3	0.653	FBXL2,RNU7-110P,UBP1	S1(4.9)	0
chr1	10532344	10699500	167	1p36.22	1.226	CASZ1,DFFA,PEX14,RN7SL614P,RP4-734G22.3	S1(5)	0
chr4	119591500	119758500	167	4q26	3.447	METTL14,SEC24D	S1(4.9)	0
chr6	119090500	119257500	167	6q22.31	0.614	ASF1A,MCM9,RP11-210H10__A.1,RP11-351A11.1	S2(4.1)	0
chr7	120870500	121037500	167	7q31.31	0.663	CPED1,FAM3C,WNT16	S2(4.3)	0
chr2	181844500	182011500	167	2q31.3	1.854	AC068196.1,AC104076.3,AC104820.2,UBE2E3	S2(3.9)	0
chr5	72250500	72416118	166	5q13.2	0.763	CTC-250P20.1,CTC-250P20.2,CTD-2376I4.2,FCHO2,Y_RNA:589	S1(5)	0
chr15	101626271	101792500	166	15q26.3	1.022	CHSY1,RP11-424I19.1,RP11-424I19.2	S1(4.8)	0
chr15	48938046	49104500	166	15q21.1	0.329	CEP152,RP11-227D13.1,RP11-227D13.2,RP11-227D13.4,RP11-485O10.2,RP11-485O10.3	G1(5.6)	0
chr3	188694542	188860500	166	3q28	0.028	RP11-297K7.1,TPRG1	S1(4.6)	0
chr22	30278500	30444500	166	22q12.2	1.19	AC003681.1,CNN2P1,CTA-85E5.10,MTMR3,RNU6-331P	S1(5.3)	0
chr17	16945500	17111500	166	17p11.2	2.084	MPRIP,MPRIP-AS1,PLD6,RN7SL775P,RNU6-767P,RP11-45M22.3,RP11-45M22.4	G1(5.6)	0
chr16	4000445	4166500	166	16p13.3	0.803	ADCY9,RP11-462G12.4	S1(5.1)	0
chr9	125863500	126029500	166	9q33.3	0.051	MIR600HG,RABGAP1,STRBP	S2(4)	0
chr22	25960815	26126500	166	22q12.1	0.031	ADRBK2,CTA-407F11.6,CTA-407F11.7,RNA5SP494	S3(3.2)	0
chr3	135754500	135920500	166	3q22.3	0.94	MSL2,PPP2R3A,RP11-305O4.2,RP11-305O4.3,TDGF1P6	S1(4.8)	0
chr5	74642500	74808500	166	5q13.3	1.744	COL4A3BP,CTD-2235C13.1,CTD-2235C13.3,HMGCR,POLK	S2(3.9)	0
chr17	16118500	16284111	166	17p11.2	0.373	CENPV,MIR1288,NCOR1,PIGL	S1(5.2)	0
chr11	68227500	68393500	166	11q13.2	2.112	AP000807.1,AP000807.2,AP003096.1,CTD-2007L18.5,NDUFA3P2,PPP6R3	S1(4.8)	0
chr3	112994500	113160457	166	3q13.2	0.072	BOC,RP11-553D4.2,WDR52,WDR52-AS1	S2(4)	0
chr1	179922500	180088500	166	1q25.2	1.167	CEP350,RP11-502H18.2,RP11-52I18.1,RP11-533E19.3,RP11-533E19.5	S1(5.3)	0
chr18	12991360	13157500	166	18p11.21	1.131	CEP192,RP11-807E13.2,RP11-807E13.3	S2(4.1)	0
chr7	36191500	36357500	166	7p14.2	0.244	AC006960.5,AC007327.5,AC007327.6,EEPD1	S2(4.2)	0
chr2	47143295	47309500	166	2p21	1.224	AC073283.7,AC093732.1,C2orf61,MCFD2,RP11-15I20.1,RP11-761B3.1,TTC7A	G1(5.6)	0
chr18	56525500	56691500	166	18q21.32	1.434	OACYLP,RNU2-69P,ZNF532	S1(5.2)	0
chr4	106628500	106794500	166	4q24	0.257	ARHGEF38,GSTCD,INTS12,RP11-45L9.1	S3(2.8)	0
chr7	136552500	136718500	166	7q33	0.303	CHRM2,KRT8P51,MIR490,hsa-mir-490	S3(3.4)	0
chr6	11173684	11339500	166	6p24.2	0.053	NEDD9,RP3-510L9.1	S2(4.1)	0
chr1	93646285	93812500	166	1p22.1	0.102	CCDC18,DR1,RP4-612C19.1,RP4-612C19.2,RP4-717I23.2,RP4-717I23.3	S1(5.2)	0
chr5	86562500	86727500	165	5q14.3	2.484	CCNH,CTC-428H11.2,RASA1,RN7SL629P,RNU6-606P,RNU6-727P	S1(4.5)	0
chr7	102388500	102553437	165	7q22.1	0.075	FAM185A,FBXL13,RN7SKP198,RNU6-1136P,RP11-577H5.1	S1(5.2)	0
chr13	31027500	31192500	165	13q12.3	0.18	HMGB1,MFAP1P1,PTPN2P2,RBM22P2,USPL1	S1(5.1)	0
chr4	54794305	54959500	165	4q12	1.021	AC110792.1,CHIC2,FIP1L1,MORF4L2P1,RP11-571I18.2,RP11-571I18.4,RPL21P44	S1(5.4)	0
chr17	20058500	20223500	165	17p11.2	1.12	AC004702.2,RNU6-1057P,SPECC1	S3(3.1)	0
chr21	29435500	29600986	165	21q21.3	0.049	AL035610.1,AL035610.2	S2(4.1)	0
chr2	99060500	99225041	165	2q11.2	0.617	COA5,INPP4A	S3(3.1)	0
chr7	73867500	74032500	165	7q11.23	0.678	AC004851.1,GTF2IRD1,RNA5SP233,RP5-1186P10.2	S1(5.3)	0
chr15	93421500	93586500	165	15q26.1	5.114	AC013394.2,CHD2,MIR3175	S2(4.2)	0
chr17	44416500	44581311	165	17q21.31	0.014	ARL17B,NSFP1	S1(5.3)	0
chr4	133909832	134074500	165	4q28.3	0.142	PCDH10,R3HDM2P1,RP11-9G1.3	S4(1.5)	0
chr7	91874500	92039500	165	7q21.2	0.985	ANKIB1,KRIT1	S1(4.6)	0
chr1	145206500	145371500	165	1q21.1	0.2	NBPF10,NOTCH2NL,RP11-458D21.5	S1(5.2)	0
chr1	86702500	86867500	165	1p22.3	0.346	ODF2L	S3(3.4)	0
chr13	20192500	20357142	165	13q12.11	1.159	AL354808.1,AL354808.2,MPHOSPH8,PSPC1,RN7SL166P,RP11-523H24.3	S2(3.6)	0
chr5	179334859	179499500	165	5q35.3	0.363	CTC-563A5.2,CTC-563A5.4,MIR340,RNF130,RPS15AP18	S1(4.6)	0
chr3	149211500	149376500	165	3q25.1	1.533	RNU6-1098P,RP11-278L15.6,TM4SF4,WWTR1,WWTR1-AS1,WWTR1-IT1	G1(5.5)	0
chr4	47486500	47651500	165	4p12	1.095	AC092597.3,ATP10D,CORIN,RP11-731J8.1	S2(3.9)	0
chr17	45330500	45495500	165	17q21.32	0.027	CTD-2026D20.2,EFCAB13,ITGB3,RNU7-186P,RP11-290H9.4	G1(5.5)	0
chr17	8369500	8533500	164	17p13.1	0.433	MYH10,NDEL1,RN7SL129P,RNU7-43P,RP11-713H12.1,RP11-713H12.2	S2(4.3)	0
chr1	167905500	168069500	164	1q24.2	1.566	DCAF6,GCSHP5,GPR161,MIR1255B2,MPC2	S1(4.8)	0
chr11	87908635	88072500	164	11q14.2	0.808	CTSC,MIR3166	S1(4.6)	0
chr10	28366500	28530500	164	10p12.1	0.209	MPP7	S1(5)	0
chr7	77161500	77325759	164	7q11.23	1.655	PTPN12,RSBN1L-AS1	S1(5.2)	0
chr1	11159938	11323500	164	1p36.22	0.808	ANGPTL7,MTOR,MTOR-AS1,RNU6-291P,RNU6-537P,RP4-635E18.6,RPL39P6,snoU13:192	S1(4.8)	0
chr16	3767598	3931500	164	16p13.3	2.275	CREBBP,RP11-95J11.1	S1(5.2)	0
chr6	15500500	15664500	164	6p22.3	0.589	DTNBP1,JARID2	S3(2.6)	0
chr10	33461500	33625500	164	10p11.22	7.846	NRP1,RN7SL398P,RP11-342D11.2	S1(5.3)	0
chr15	101459419	101623500	164	15q26.3	1.127	LRRK1,RP11-505E24.2,RP11-505E24.3,RP11-66B24.4	S1(4.8)	0
chr5	139780500	139944040	164	5q31.3	0.875	ANKHD1,ANKHD1-EIF4EBP3,APBB3,CTC-329D1.2,EIF4EBP3,SNORD45:2,SRA1	S1(5.2)	0
chr1	68139500	68303500	164	1p31.3	2.701	GADD45A,GNG12,GNG12-AS1,RNU7-80P	S1(5.4)	0
chr2	238159500	238323018	164	2q37.3	5.385	AC112715.2,COL6A3	G1(5.7)	0
chr14	100841500	101005275	164	14q32.2	0.554	BEGAIN,CTD-2062F14.2,RN7SKP92,RP11-362L22.1,WARS,WDR25	S2(4.4)	0
chr15	82391500	82555500	164	15q25.2	0.589	EFTUD1,FAM154B,RNU1-77P	S2(4.2)	0
chr6	161532500	161696500	164	6q26	0.406	AGPAT4,MAP3K4	S3(2.9)	0
chr18	2650500	2813500	163	18p11.32	1.352	CBX3P2,RP11-703M24.5,SMCHD1,Y_RNA:262,snoU13:146	S1(4.8)	0
chr11	77185680	77348850	163	11q14.1	0.245	AP002789.1,AQP11,CLNS1A,DKFZP434E1119,RNU7-59P	S1(5)	0
chr7	1015235	1177896	163	7p22.3	0.345	AC073957.15,AC091729.7,AC091729.8,C7orf50,CYP2W1,GPER1,GPR146,MIR339,RP11-449P15.1	S1(4.8)	0
chr2	242295657	242458500	163	2q37.3	0.758	AC110299.5,FARP2,MIR3133,STK25	S1(5.1)	0
chr2	175870097	176033110	163	2q31.1	1.473	AC007435.1,AC096649.2,ATF2,MIR933,RNU6-1290P,RNU6-763P,RP11-6C10.1	S2(4.3)	0
chr15	85523500	85686500	163	15q25.3	0.879	PDE8A	S1(5)	0
chrX	47695500	47858500	163	Xp11.23	0.183	RPL7P57,ZNF182,ZNF630,ZNF81	S2(3.5)	0
chr6	126498338	126661319	163	6q22.32	0.045	PPP1R14BP5,RP11-527F13.1	S3(3.2)	0
chr5	121646500	121809500	163	5q23.2	0.147	CTC-210G5.1,CTD-2280E9.1,CTD-2544H17.1,CTD-2544H17.2,SNCAIP	S2(3.9)	0
chr13	34391500	34554500	163	13q13.2	0.265	AL161891.1,RFC3,RNU5A-4P	S2(4)	0
chr1	119681500	119844500	163	1p12	0.146	RP11-418J17.1,RP11-418J17.2,RP11-418J17.3,WARS2,snoU13:169	S3(3.1)	0
chr8	143322500	143485500	163	8q24.3	0.166	CTD-3135A9.3,RP13-467H17.1,TSNARE1	S3(3)	0
chr1	10091500	10254500	163	1p36.22	0.809	PGAM1P11,RNU6-828P,RP11-496H15.2,UBE4B	S1(5.3)	0
chr5	108499500	108662070	163	5q21.3	0.166	CTD-2587M2.1,FER	S3(3.2)	0
chr15	42867856	43031315	163	15q15.2	0.453	CDAN1,RP11-265N6.4,STARD9,TTBK2,snoU13:94	S1(5.3)	0.285	1		1
chr9	130213684	130375500	162	9q33-34	2.685	FAM129B,LRSAM1,STXBP1,Y_RNA:735	G1(5.6)	0
chrX	123094500	123256500	162	Xq25	1.187	RP1-315G1.3,STAG2	S1(4.7)	0
chr4	177553500	177715500	162	4q34.3	8.481	RP11-313E19.1,RP11-313E19.2,VEGFC	S1(5.3)	0
chr6	131455500	131617500	162	6q23.2	0.296	AKAP7,RP1-209B5.2	S1(4.8)	0
chr6	125282500	125444500	162	6q22.31	1.313	RNF217,RP11-510H23.1,TPD52L1	S2(4)	0
chr11	33563617	33725500	162	11p13	1.304	C11orf91,CD59,KIAA1549L,RP4-541C22.5	S1(5.4)	0
chr18	39739246	39901500	162	18q12.3	0.02	LINC00907,RNA5SP454	S4(2.4)	0
chr6	86191500	86353500	162	6q14.3	2.401	NT5E,RP1-3J17.3,RP11-321N4.5,SNX14,SYNCRIP	S1(5.4)	0.358	1		1
chr11	73720480	73882500	162	11q13.4	0.454	C2CD3,PPME1,RP11-691F15.1	S1(5)	0
chrX	80456500	80618766	162	Xq21.1	0.661	AL357115.1,HMGN5,SH3BGRL	G2(1.4)	0
chr1	206331500	206643790	162	1q32.1	0.339	CTSE,RP11-421E17.4,SRGAP2,SRGAP2-AS1	S1(5.2)	0
chr21	28336500	28498500	162	21q21.3	0.034	ADAMTS5	S3(3.4)	0
chr9	98636500	98797500	161	9q22.32	0.951	ERCC6L2,LINC00092,LINC00476,RNA5SP289,RP11-72B4.2	S3(3.3)	0
chr10	11493500	11654500	161	10p14	0.454	RP11-138I18.1,USP6NL	S3(3.3)	0
chr1	185126211	185286910	161	1q25.3	0.173	CTA-253N17.1,IVNS1ABP,RP4-635A23.3,RP4-635A23.4,RPL5P5,SWT1,Y_RNA:302,Y_RNA:303,Y_RNA:341	S2(4.3)	0
chr2	39187483	39348500	161	2p22.1	0.95	AC019171.4,ARHGEF33,RNU6-198P,SOS1,SOS1-IT1	S1(4.7)	0
chr4	15470500	15631500	161	4p15.32	0.372	AC007016.3,CC2D2A,FBXL5,RP11-799M12.2	S2(4.3)	0
chr2	97777500	97938500	161	2q11.2	0.092	ANKRD36	S3(3.3)	0
chr15	67336500	67497500	161	15q22.33	5.11	AAGAB,RP11-342M21.2,RP11-798K3.2,SMAD3	G1(5.6)	0
chr19	33852354	34013500	161	19q13.11	0.596	CEBPG,PEPD	S3(3.1)	0
chr20	45829500	45990500	161	20q13.12	1.197	AL031666.1,AL031666.2,RN7SL243P,RP4-569M23.2,RP4-569M23.4,ZMYND8	S1(5.4)	0
chr12	105191500	105352500	161	12q23.3	0.123	AC090051.1,SLC41A2,Y_RNA:76	S1(5)	0
chr11	14386052	14547500	161	11p15.2	0.98	COPB1,PSMA1,RNU7-49P,RP11-140L24.3	G1(5.7)	0
chr16	19566561	19727777	161	16p12.3	0.836	AC002550.5,C16orf62,KNOP1	S3(2.8)	0
chr15	56376500	56537500	161	15q21.3	1.459	RFX7,RP11-5N19.3,TEX9	S2(4.1)	0
chr2	149397500	149558500	161	2q23.1	1.55	EPC2	S3(3.1)	0
chr2	75381491	75542500	161	2p12	0.112	RP11-355F16.1,TACR1	S1(5)	0
chr2	65503500	65664500	161	2p14	1.222	AC012370.2,AC074391.1,SPRED2	S1(4.9)	0
chr4	71569920	71730500	161	4q13.3	1.374	GRSF1,RNU6-459P,RNU6-891P,RP11-46J23.1,RUFY3,snoU13:319	S1(4.6)	0
chr3	132135500	132296500	161	3q22.1	1.813	ACAD11,DNAJC13,NPHP3	S1(5.1)	0
chr4	186130500	186291878	161	4q35.1	1.199	KIAA1430,LRP2BP,SNX25	S3(3)	0
chr7	137531838	137692500	161	7q33	4.573	AC022173.2,AKR1D1,CREB3L2	S2(4.4)	0
chr22	21052500	21213500	161	22q11.21	0.84	AC007308.6,BCRP5,PI4KA,POM121L4P,SERPIND1,SNAP29,TMEM191A	S1(5.1)	0
chr4	125479589	125639500	160	4q28.1	1.46	ANKRD50	S3(3)	0
chr1	120453236	120613500	160	1p11-12	1.605	NOTCH2	S1(5.4)	0
chr12	109549022	109709500	160	12q24.11	0.173	ACACB,RP11-968O1.5	S2(3.6)	0
chr3	149529500	149689065	160	3q25.1	1.074	ANKUB1,NPM1P29,PFN2,RNF13,RNU6-720P	S1(5.1)	0
chr6	107810500	107970500	160	6q21	0.026	RP1-67A8.3,SOBP	S2(3.5)	0
chr10	94174500	94334500	160	10q23.33	0.554	AL161652.1,IDE,MARK2P9	S1(4.9)	0
chr11	74501500	74661500	160	11q13.4	0.212	AP001992.1,RN7SL239P,RNF169,RP11-147I3.1,SPCS2,XRRA1	S1(5)	0
chr9	109621500	109781500	160	9q31.2	0.434	RP11-508N12.2,RP11-508N12.3,RP11-508N12.4,ZNF462	S3(3.2)	0
chr6	97576500	97736500	160	6q16.1	0.493	KLHL32,MMS22L,RP3-418C23.2	S3(3.1)	0
chr2	24424567	24584500	160	2p23.3	0.795	AC009228.1,HMGN2P20,ITSN2,RPL36AP13,SCARNA21:3	S1(4.8)	0
chr7	155432500	155592500	160	7q36.3	1.822	AC009403.2,RBM33	S3(2.6)	0
chr13	44991500	45151500	160	13q14.11	1.306	RP11-71C5.2,TSC22D1	S1(4.5)	0
chr14	51861500	52021377	160	14q22.1	0.078	FRMD6,FRMD6-AS2,RNU6-1291P,RP11-255G12.3,SETP2	G1(5.6)	0
chr19	47363500	47523076	160	19q13.32	2.902	ARHGAP35,snoU13:160	G1(5.6)	0
chr13	40228500	40388500	160	13q14.11	0.453	COG6,MIR4305,RNY4P14	S3(3.2)	0
chrX	40943500	41103500	160	Xp11.4	1.714	RP5-1172N10.4,USP9X	S1(5.1)	0
chr7	79460500	79619500	159	7q21.11	0.096	RNU6-849P	S1(4.9)	0
chr6	129873732	130032500	159	6q22.33	3.366	ARHGAP18	S1(5.4)	0
chr9	15149500	15308500	159	9p22.3	0.318	TTC39B	S3(2.7)	0
chr3	47051500	47210500	159	3p21.31	1.95	KIF9-AS1,NRADDP,SETD2,snoU13:296	S1(5.3)	0
chr2	187555500	187714500	159	2q32.1	0.039	AC017101.10,FAM171B,ZSWIM2	S2(3.9)	0
chr4	120392500	120551500	159	4q26	1.603	PDE5A,RP11-33B1.1,SNORA11:5	S2(4.3)	0
chr12	1639056	1797739	159	12p13.33	4.236	FBXL14,MIR3649,WNT5B	S1(5.4)	0.284	1		1
chr4	119115906	119274500	159	4q26	1.124	NDST3,PRSS12,SNHG8	S2(4)	0
chr3	179369500	179528500	159	3q26.33	1.093	PEX5L,RP11-494H4.3,USP13	S2(3.7)	0
chr9	6382500	6541500	159	9p24.1	1.349	C9orf38,GLDC,RP11-307L3.4,UHRF2	S1(4.7)	0
chr6	161411500	161570500	159	6q26	0.682	AGPAT4,MAP3K4,RP3-428L16.2	S3(2.9)	0
chr5	78652500	78811500	159	5q14.1	0.184	HOMER1,RP11-342F17.1	S2(4.1)	0
chr1	162601162	162760491	159	1q23.3	3.916	DDR2,RN7SL861P	G1(5.5)	0
chr4	110961500	111120500	159	4q25	0.279	ELOVL6,RN7SL275P,RP11-115A14.1	S3(3.3)	0
chr6	158243500	158402887	159	6q25.3	2.449	RNU6-786P,RP11-52J3.2,RP11-52J3.3,RP3-403L10.2,RP3-403L10.3,SNX9	G1(5.5)	0
chr5	38917500	39075500	158	5p13.1	1.678	AIG1P1,OSMR,RICTOR	S1(5.1)	0
chr7	129440500	129598500	158	7q32.2	1.587	RP11-306G20.1,UBE2H,Y_RNA:657	S1(5.4)	0
chr5	52855500	53013500	158	5q11.2	1.194	AC024569.1,NDUFS4	S2(4.3)	0
chr6	114291500	114449500	158	6q21	0.087	HDAC2,HS3ST5,NUDT19P3,RP3-399L15.3,RPSAP43	S2(3.6)	0
chrX	56100756	56258853	158	Xp11.21	0.144	AL353698.1	S4(1.8)	0
chr2	65658500	65816500	158	2p14	0.031	AC007389.1,AC007389.2,AC012370.3,AC074391.1,RN7SL635P,SPRED2,Vault:4	S1(4.9)	0
chr4	5708500	5866500	158	4p16.2	1.685	CRMP1,EVC,EVC2	S3(3)	0
chr4	140216500	140374385	158	4q31.1	1.162	ACA64:4,NAA15,NDUFC1,RNU6-1214P,RP11-83A24.1,RP11-83A24.2	S1(5.2)	0
chr1	245132500	245290500	158	1q44	0.227	EFCAB2,RNU6-1089P,RNU6-999P,RP11-156E8.1,RP11-290P14.2	S2(4)	0
chr2	164435500	164593500	158	2q24.3	1.232	FIGN	S3(2.6)	0
chr7	30810500	30968500	158	7p14.3	0.274	AC004691.5,AQP1,FAM188B,INMT-FAM188B	S1(4.7)	0
chr4	169081500	169239958	158	4q32.3	0.176	ANXA10,DDX60,snoU13:311	S1(4.8)	0
chr10	24855500	25012500	157	10p12.1	2.333	ARHGAP21,RNA5SP305	S1(4.7)	0
chr14	58461243	58618500	157	14q23.1	0.035	C14orf37,RP11-349A22.2,UBA52P3	S2(4)	0
chr14	65380500	65537500	157	14q23.3	0.607	AL139022.1,CHURC1,CHURC1-FNTB,FNTB,GPX2,MAX,MIR4706,RAB15,RP11-840I19.5	S1(4.9)	0
chr6	75758500	75915767	157	6q13-14	6.47	COL12A1	S1(4.6)	0
chr3	37062500	37219500	157	3p22.2	3.055	LRRFIP2,MLH1,RNU6-1301P,UBE2D3P2,UBE2FP1,Y_RNA:518	G1(5.7)	0
chr2	135804500	135961500	157	2q21.3	1.937	MAP3K19,RAB3GAP1,SNORA40:11,ZRANB3,snoU13:257	S2(3.7)	0
chr16	74483790	74641012	157	16q23.1	0.897	GLG1,RNU6-237P,RP11-572F4.1,Y_RNA:217	S1(4.7)	0
chr15	68345500	68502500	157	15q23	1.864	CALML4,CLN6,PIAS1,RP11-315D16.2	S1(4.9)	0
chr8	104153703	104311000	157	8q22.3	0.15	BAALC,FZD6,MIR3151,RP11-318M2.2,RP11-318M2.3	S1(5)	0
chr12	110561500	110718560	157	12q24.11	0.389	IFT81	G1(5.6)	0
chr18	74050500	74207500	157	18q23	1.78	RP11-17M16.1,RP11-17M16.2,RP11-504I13.3,ZNF516	S2(3.5)	0
chr15	81125500	81282219	157	15q25.1	0.313	KIAA1199,MESDC2,MIR549,RP11-351M8.1,RP11-351M8.2	S1(5.2)	0
chr2	203499900	203656500	157	2q33.2	0.037	AC098831.4:1,AC098831.4:2,FAM117B,ICA1L	S2(4.2)	0
chr8	145754516	145911500	157	8q24.3	0.162	AC084125.1,AC084125.2,AC084125.3,ARHGAP39,CTD-2517M22.9	S1(4.8)	0
chr19	24210500	24367500	157	19p12	0.941	CTD-2017D11.1,CTD-2017D11.3,HAVCR1P1,ZNF254	S4(1.9)	0
chr5	79395500	79552500	157	5q14.1	0.789	CTC-458I2.2,SERINC5,snoU13:355	S2(3.5)	0
chr2	85046500	85203500	157	2p11.2	0.299	AC022210.1,AC022210.2,DNAH6,KCMF1,RPL12P18,TMSB10,TRABD2A	G1(5.5)	0
chr12	122751068	122908500	157	12q24.31	1.472	CLIP1,RP11-450K4.1,RP11-512M8.3,RPL21P1	G1(5.5)	0
chr5	41719500	41875500	156	5p13.1	0.807	OXCT1,OXCT1-AS1	S3(2.6)	0
chr2	25946500	26102500	156	2p23.3	0.874	AC010150.1,ASXL2,PTGES3P2,TPM3P7	S1(4.8)	0
chr9	26946500	27102627	156	9p21.2	0.28	IFT74,LRRC19,PLAA,RP11-337A23.3	S2(3.5)	0
chrX	16575500	16731500	156	Xp22.2	0.177	CTPS2,MIR548AM,S100G	S1(4.8)	0
chr1	173176452	173332872	156	1q25.1	0.235	RP11-296O14.1,RP11-296O14.2,snoU13:176	S1(4.8)	0
chr10	97694500	97850500	156	10q24.1	0.083	C10orf131,CC2D2B,CCNJ,ENTPD1-AS1,MIR3157,RP11-248J23.5,RP11-248J23.6,RP11-690P14.4	S4(2.4)	0
chr11	17074500	17230500	156	11p15.1	0.883	AC116533.1,AC116533.2,CTD-3236F5.1,NUCB2,OR7E14P,PIK3C2A,RNU6-593P,RP11-452G18.1,RPS13,SNORD14A,SNORD14B	S1(4.9)	0
chr1	115721500	115877500	156	1p13.2	0.189	NGF,RP4-663N10.1	S1(5.3)	0
chr17	75954500	76110500	156	17q25.3	0.97	AC021593.1,RNU6-625P,TMC6,TNRC6C,TNRC6C-AS1,UBE2V2P2	S1(4.9)	0
chr13	51872500	52028500	156	13q14.3	1.008	INTS6,INTS6-AS1,MIR5693,RP11-24B19.3,RP11-24B19.4,RPS4XP16,SERPINE3	S1(4.9)	0
chr7	16955500	17111500	156	7p21.1	0.052	AC098592.7,AC098592.8	S1(4.8)	0
chr5	130598500	130754500	156	5q23-31	0.9	CDC42SE2	S1(4.6)	0
chr10	64134500	64290500	156	10q21.2	0.093	ZNF365	S1(4.8)	0
chr11	86510500	86666660	156	11q14.2	0.807	AP000654.4,AP000654.5,FZD4,OR7E13P,OR7E2P,PRSS23,RP11-736K20.5	S1(5.4)	0
chr11	57480071	57636500	156	11q12.1	1.614	AP000662.9,BTBD18,C11orf31,CTNND1,OR5BA1P,RP11-691N7.6,TMX2,TMX2-CTNND1	S1(4.6)	0
chr2	240808500	240965500	156	2q37.3	0.731	MIR4786,NDUFA10	S3(3.1)	0
chr11	126225534	126380500	155	11q24.2	0.496	KIRREL3,ST3GAL4	S1(5)	0
chr16	81812500	81967500	155	16q23.3	0.027	PLCG2	S2(4.3)	0
chr12	121187500	121342500	155	12q24.31	0.974	ARF1P2,RP11-173P15.7,SPPL3	S2(4.4)	0
chr6	158402887	158557500	155	6q25.3	1.91	SERAC1,SYNJ2,SYNJ2-IT1	G1(5.5)	0
chr5	125695500	125850500	155	5q23.2	4.976	GRAMD3,RP11-517I3.1	G1(5.5)	0
chr2	75272500	75427500	155	2p12	0.125	MIR5000,RP11-355F16.1,TACR1	S1(5)	0
chr8	95332500	95487337	155	8q22.1	0.319	FSBP,RAD54B,RPS4XP10	S1(5.1)	0
chr8	42242500	42397500	155	8p11.21	2.087	RP11-1007J8.1,RP11-503E24.2,SLC20A2,SMIM19,VDAC3	S1(5)	0
chr6	118621500	118776155	155	6q22.31	0.188	RP11-57K17.1,SLC35F1	S3(3.3)	0
chr3	128443500	128598438	155	3q21.3	2.712	FTH1P4,MARK2P6,MARK2P8,RAB7A,RN7SL698P,RP11-221E20.4,RP11-221E20.5,RP11-723O4.2,RP11-723O4.3,RP11-723O4.9,RPS15AP16	S1(5)	0
chr5	113696641	113851500	155	5q22.3	3.165	KCNN2,RP11-492A10.1	S3(3.3)	0
chr1	25044500	25199500	155	1p36.11	3.278	CLIC4,RNU6-1208P	S1(5.4)	0
chr4	56262014	56417500	155	4q12	1.302	AC069200.1,CLOCK,RN7SKP30,RP11-528I4.2,TMEM165,Y_RNA:536,Y_RNA:563	S1(4.5)	0
chrY	22583500	22738500	155	Yq11.223	0.047	EIF1AY,TTTY10	NULL	0
chr11	77030500	77185680	155	11q13-14	0.506	DKFZP434E1119,PAK1	S1(5)	0
chr9	107536500	107691500	155	9q31.1	1.188	ABCA1,NIPSNAP3B,RP11-217B7.2	S1(4.9)	0
chr6	71121500	71276619	155	6q13	0.205	FAM135A,RNU7-48P,RP11-462G2.2	S3(2.7)	0
chr17	62504317	62659500	155	17q23-24	7.86	AC009994.2,CEP95,RP11-87N3.6,SMURF2	G1(5.6)	0
chr6	116420500	116575335	155	6q22.1	0.675	AL121963.1,COL10A1,NIP7P3,NT5DC1,RP3-486I3.5,TSPYL4	S2(4.4)	0
chr9	71736208	71891500	155	9q21.11	0.373	AL358113.1,TJP2	S1(4.5)	0
chr10	33268500	33422500	154	10p11.22	0.078	AL121748.1,ITGB1,RN7SL847P,RP11-342D11.3,RP11-462L8.1,RP11-462L8.2,RP11-479G22.6,RP11-479G22.7	G1(5.6)	0
chr10	75756500	75910959	154	10q22.2	4.249	AP3M1,RP11-178G16.4,RP11-178G16.5,RP11-417O11.5,VCL	G1(5.6)	0
chr20	32950500	33104213	154	20q11.22	1.776	CDC42P1,FDX1P1,ITCH,ITCH-AS1,ITCH-IT1,MIR644A,Y_RNA:383	G1(5.5)	0
chr10	98587500	98741040	154	10q24.1	1.954	AL162502.1,HMGN2P35,LCOR,MIR607	S2(4)	0
chr17	33905064	34058667	154	17q12	1.57	AP2B1,CTC-507E2.1,CTC-507E2.2,PEX12,RPL17P42	S1(4.8)	0
chr11	128563500	128717500	154	11q24.3	0.621	FLI1,FLI1-AS1,KCNJ1	S1(5)	0
chr1	227728500	227882500	154	1q42.13	0.285	AL592310.1,RNA5SP77,RP4-566D2.1,ZNF678	S2(3.8)	0
chr3	72744500	72898500	154	3p13	0.356	RP11-624D20.1,SHQ1	S2(4)	0
chr6	79576500	79730500	154	6q14.1	0.071	AL356776.1,IRAK1BP1,PHIP	S4(2.4)	0
chr10	33024500	33178239	154	10p11.22	0.137	C10orf68,RP11-479G22.8	S1(5.1)	0
chr21	46494500	46648500	154	21q22.3	0.119	ADARB1,PRED57,PRED58	S1(5.2)	0
chr17	78234664	78388964	154	17q25.3	1.341	CTD-2047H16.2,CTD-2047H16.4,RNF213	S1(5.1)	0
chr8	117615500	117769500	154	8q23-24	1.458	EIF3H	S1(4.5)	0
chr3	127388500	127542500	154	3q21.3	1.305	ABTB1,MGLL,PODXL2	S1(5)	0
chr15	41912500	42066631	154	15q15.1	0.655	MGA,MIR626,RP11-107F6.3,RP11-107F6.4	S1(5.4)	0
chr12	46777461	46931284	154	12q13.11	0.284	RP11-474P2.4,RP11-96H19.1	G1(5.5)	0
chr18	59702500	59855500	153	18q21.33	0.31	KIAA1468,PIGN	S1(4.8)	0
chr17	37606500	37759500	153	17q12	0.751	CDK12,MED1,RNU6-233P,RNU6-981P	S1(5.1)	0
chr18	74533500	74686645	153	18q23	0.704	RP11-162A12.2,RP11-162A12.3,RPL26P35,ZNF236	S2(3.5)	0
chr14	37489500	37642500	153	14q13.3	0.029	RP11-537P22.2,SLC25A21,SLC25A21-AS1	S3(3)	0
chr8	33218933	33371500	153	8p12	0.5	FUT10,MAK16,RP11-359B20.1,SNORD13,TTI2	S2(4.1)	0
chr4	48332500	48485359	153	4p11	1.62	SLAIN2	S1(5)	0
chr11	71993500	72146500	153	11q13.4	0.425	AP000593.7,CLPB,RP11-45F15.1,RP11-45F15.2,RP11-7N14.1	S1(4.8)	0
chr6	160389500	160542820	153	6q25.3	1.806	AIRN,IGF2R,RP11-288H12.3,RP11-288H12.4	S2(3.6)	0
chr4	177235500	177388500	153	4q34.2	0.501	RP11-87F15.2,SPCS3	S1(5.4)	0
chr1	36396318	36549675	153	1p34.3	0.712	AGO3,RP4-665N4.4,RP4-665N4.8	G1(5.5)	0
chr4	25161500	25314406	153	4p15.2	0.572	PI4K2B,RP11-660M5.1,SEPSECS	S2(4.4)	0
chr1	179046500	179199500	153	1q25.2	2.42	ABL2,EIF4A1P11,RP11-345I18.1,RP11-345I18.4,SETP10,SNORA67:2,SNORA67:3,TOR3A	S1(4.9)	0
chr4	153695500	153848597	153	4q31.3	0.939	AC099339.1,ARFIP1,RP11-529H22.1,TIGD4	S2(4.3)	0
chr5	144608545	144761233	153	5q32	0.044	ASS1P10,CTC-806A22.1	S3(3)	0
chr3	182510500	182663500	153	3q26.33	0.965	ATP11B,DCUN1D1,RP11-225N10.1,RP11-225N10.3,RP11-531F16.4	S3(3.3)	0
chr11	10395500	10548500	153	11p15.4	0.281	AMPD3,MTRNR2L8,RNF141,RNU6ATAC33P	G1(5.6)	0
chr9	93972581	94125500	153	9q22.31	0.567	AUH	S1(5.2)	0
chr5	16465901	16618500	153	5p15.1	0.02	CTC-461F20.1,FAM134B,RP11-260E18.1	S2(3.7)	0
chr7	129246500	129399500	153	7q32.2	0.835	NRF1,RNA5SP244,RP11-448A19.1	S1(5.1)	0
chr15	51199500	51352500	153	15q21.2	0.655	AP4E1,DCAF13P3,RP11-108K3.1,TNFAIP8L3	S1(4.9)	0
chrX	9982500	10134500	152	Xp22.2	0.459	CLCN4,WWC3,WWC3-AS1,Y_RNA:765	S1(4.7)	0
chrX	74225500	74377500	152	Xq13.3	0.271	ABCB7	S4(2.1)	0
chr3	133818500	133970500	152	3q22.2	1.271	HMGB3P14,RYK	S1(5.3)	0
chrX	79913500	80065500	152	Xq21.1	0.509	BRWD3,RP11-325E14.5	S4(2)	0
chr15	68870500	69022500	152	15q23	0.242	CORO2B	S1(4.9)	0
chr11	108092500	108244500	152	11q22.3	0.544	AP001925.1,ATM,C11orf65,NPAT,Y_RNA:56	S2(4)	0
chr1	55530500	55682500	152	1p32.3	1.479	PCSK9,USP24	S1(4.9)	0
chr9	103188500	103340360	152	9q31.1	0.926	MSANTD3,MSANTD3-TMEFF1,TMEFF1	S1(4.7)	0
chr1	195460500	195612500	152	1q31.3	0.019		S3(2.9)	0
chr8	92964500	93116500	152	8q21.3	0.903	GS1-5L10.1,RUNX1T1	S3(3.2)	0
chrX	72782500	72934500	152	Xq13.2	0.333	CHIC1,MAP2K4P1	S3(3.1)	0
chr2	55496483	55648500	152	2p16.1	0.632	AC012358.8,CCDC88A,PRORSD1P,Y_RNA:435	S1(5.3)	0
chr10	26726500	26878793	152	10p12.1	1.951	APBB1IP,RNA5SP307,RP11-128B16.3	S3(3.2)	0
chr16	28076500	28228500	152	16p11-12	2.52	SNORA25:9,TPRKBP2,XPO6,Y_RNA:200	S2(4)	0
chr10	18797500	18949500	152	10p12.31	0.23	ARL5B,ARL5B-AS1,CACNB2,NSUN6,RP11-139J15.7,RP11-383B4.4,RP11-499P20.2	S4(2.3)	0
chrX	31133500	31285500	152	Xp21.2	0.283	DMD	S3(3)	0
chr10	27792500	27944500	152	10p12.1	0.952	RAB18	S2(4.4)	0
chr6	168227500	168379500	152	6q27	0.713	MLLT4,RP3-470B24.5	S4(2.1)	0
chr12	13197217	13349649	152	12p13.1	0.073	GSG1,KIAA1467	G1(5.6)	0
chr11	35683500	35835881	152	11p13	1.205	TRIM44	S1(5)	0
chr12	39685500	39837500	152	12q12	0.094	AC121334.1,KIF21A	S4(2)	0
chr8	30890500	31042500	152	8p12	0.59	PURG,RP11-363L24.3,RP11-473A17.1,WRN	S3(3.1)	0
chr2	101616500	101768500	152	2q11.2	0.397	AC016738.4,RN7SL548P,RP11-299H21.1,RP11-426K3.1,RPL31,TBC1D8	S1(5)	0
chr8	66545500	66696500	151	8q13.1	0.332	ARMC1,MTFR1,PDE7A,RP11-707M3.3	S3(3.2)	0
chr13	41345309	41495910	151	13q14.11	0.111	CYCSP34,MIR621,SLC25A15,SUGT1P3,TPTE2P5	S1(4.6)	0
chr6	42530500	42681500	151	6p21.1	1.094	PRPH2,RNU6-890P,UBR2	S1(5.4)	0
chr8	1772141	1923500	151	8p23.3	0.778	ARHGEF10,KBTBD11,KBTBD11-OT1,RP11-439C15.4,RP11-439C15.5	S2(3.5)	0
chr6	146135889	146286500	151	6q24.3	0.428	RP11-545I5.3,SHPRH	S3(3.3)	0
chr15	30917500	31068500	151	15q13.2	0.57	ARHGAP11B,RP11-932O9.10,RP11-932O9.7,U8:11,Y_RNA:164	S3(3.4)	0
chr1	119381500	119532179	151	1p12	1.02	TBX15	S3(3.1)	0
chr6	53658500	53809500	151	6p12.1	0.504	LRRC1,MLIP,RP11-411K7.1,RP13-476E20.1,RP3-523E19.2	S2(3.9)	0
chr1	45806142	45956872	151	1p34.1	0.085	RP11-291L19.1,TESK2,TOE1,snoU13:207	S1(4.9)	0
chr3	52569070	52719933	151	3p21.1	1.194	GNL3,PBRM1,RNU6-856P,RNU6ATAC16P,SMIM4	S1(5.3)	0
chr2	145127500	145278500	151	2q22.3	1.867	AC009951.1,AC009951.2,ZEB2,ZEB2-AS1	S2(3.9)	0
chr6	19655500	19806500	151	6p22.3	0.058	RP1-167F1.2,RP3-471C18.1,RP3-471C18.2,RP4-625H18.2	S3(2.6)	0
chr5	145315500	145466500	151	5q32	0.229	AC005351.1,PLAC8L1,SH3RF2	S2(4)	0
chr12	116820500	116971226	151	12q24.22	0.163	MIR4472-2,RP11-148B3.1,RP11-148B3.2	S1(5.4)	0
chr8	122989500	123140500	151	8q24.13	0.026	MRPS36P3,RP11-398G24.2	S1(5)	0
chr1	182987500	183138500	151	1q25.3	3.611	LAMC1,RP11-181K3.4	G1(5.5)	0
chr10	826500	977500	151	10p15.3	2.295	LARP4B	S1(5)	0
chrX	134328610	134479500	151	Xq26.3	0.246	AL590282.1,RP13-210D15.1,RP13-210D15.4,RP13-210D15.6,ZNF449,ZNF75D	S3(3.4)	0
chr9	12773500	12924500	151	9p23	0.119	LURAP1L,RP11-3L8.3,Y_RNA:734	S2(3.6)	0
chr6	26774500	26925500	151	6p22.2	0.015	GUSBP2,LINC00240,RP11-239L20.3	S4(2.2)	0
chr8	27167500	27318500	151	8p21.2	0.181	CHRNA2,PTK2B,TRIM35	S3(3.3)	0
chr10	25091500	25242500	151	10p12.1	0.189	PRTFDC1,RN7SKP241,RP11-129O7.2,RP11-165A20.3	S1(4.9)	0
chr5	171464500	171615390	151	5q35.1	1.373	AC113342.1,STK10	S1(5.3)	0
chr7	111845500	111996500	151	7q31.1	0.752	AC004112.4,DOCK4,RN7SKP187,ZNF277	S2(3.6)	0
chr9	5856426	6007901	151	9p24.1	0.642	KIAA2026,MIR4665,MLANA,snoU13:438	S2(4.4)	0
chr4	3294500	3445500	151	4p16.3	0.592	HGFAC,RGS12,RP11-357G3.1,RP11-357G3.2	S1(4.9)	0
chr9	108455500	108605500	150	9q31.2	0.166	RP11-18B3.2,RP11-18B3.3,TMEM38B	S3(3.2)	0
chr5	77655500	77805500	150	5q14.1	0.427	CTD-2037K23.2,LHFPL2,SCAMP1	S1(4.8)	0
chr8	67975500	68125500	150	8q13.1-2	0.543	ARFGEF1,COPS5,CSPP1,RNA5SP268,RP11-453N18.1	S2(3.5)	0
chr1	52870131	53020500	150	1p32.3	0.71	PRPF38A,RP11-25O10.2,ZCCHC11,snoU13:187	S1(5)	0
chr9	19225500	19375448	150	9p22.1	0.857	DENND4C,RP11-146N23.4,RP11-513M16.7,snoU13:436	S1(4.8)	0
chr19	56729500	56879752	150	19q13.43	0.27	AC006116.13,AC006116.14,AC006116.15,AC006116.17,AC006116.19,AC006116.20,AC006116.21,AC006116.22,VN2R17P,Y_RNA:287,ZNF542,ZSCAN5A,ZSCAN5D	S3(2.8)	0
chr2	113520500	113670547	150	2q13	0.251	AC079753.1,AC079753.4,CKAP2L,IL1A,IL1B	S1(5.3)	0
chr12	89953500	90103500	150	12q21.33	2.435	AC068641.1,ATP2B1,LINC00936,RP11-981P6.1	S1(4.8)	0
chr10	88952500	89102500	150	10q23.2	0.063	LINC00863,NUTM2A,NUTM2A-AS1	S1(5.1)	0
chr18	43177500	43327180	150	18q12.3	0.019	RP11-116O18.1,RP11-116O18.3,SLC14A1,SLC14A2	S1(5.2)	0
chr4	106066500	106216500	150	4q24	1.074	RN7SL89P,TET2,TET2-AS1	S3(2.8)	0
chr2	68338080	68488362	150	2p14	1.724	AC017083.1,AC017083.2,PNO1,PPP3R1,RP11-474G23.1,RP11-474G23.2,RP11-474G23.3,WDR92	S1(4.7)	0
chr9	3525500	3674545	149	9p24.2	0.18	RFX3,RP11-509J21.1,RP11-509J21.2	S2(4.2)	0
chr16	69594500	69743776	149	16q22.1	3.914	MIR1538,NFAT5,NQO1,RP11-311C24.1,snoU13:124	G1(5.6)	0
chr16	19727777	19876500	149	16p12.3	0.108	CTC-496I23.1,CTD-2380F24.1,GPRC5B,IQCK,KNOP1	S3(3.2)	0
chrX	57146500	57295500	149	Xp11.21	0.092	PPP1R11P2,RP3-323P24.3,SPIN2A,SPIN2B	S4(1.8)	0
chr16	74886500	75035500	149	16q23.1	0.399	WDR59,ZNRF1	S1(4.8)	0
chr22	36636000	36784500	149	22q12.3	6.895	APOL1,MYH9,RN7SL349P	G1(5.6)	0
chr14	104028232	104177606	149	14q32.33	1.959	AL139300.1,APOPT1,BAG5,KLC1,RNU4-68P,RP11-73M18.10,RP11-73M18.2,RP11-73M18.6,RP11-73M18.7,RP11-73M18.8,RP11-894P9.1,XRCC3	G1(5.6)	0
chr2	160770500	160919500	149	2q24.2	0.414	PLA2R1	S1(4.8)	0
chr10	49513500	49662500	149	10q11.22	2.2	ARHGAP22,MAPK8	S2(3.9)	0
chr8	81876500	82025500	149	8q21.13	0.206	PAG1,RP11-1149M10.1,RP11-172E10.1	S2(4.1)	0
chr17	60555500	60704761	149	17q23.2	1.36	RP11-464D20.2,RP11-464D20.6,TLK2	S1(5.3)	0
chr2	64098500	64247500	149	2p14-15	1.013	ACA59:3,UGP2,VPS54	S1(4.7)	0
chr19	16627500	16776500	149	19p13.11	1.38	C19orf44,CHERP,CTC-429P9.1,CTC-429P9.2,CTC-429P9.3,CTC-429P9.4,CTC-429P9.5,CTD-3222D19.10,CTD-3222D19.11,CTD-3222D19.2,CTD-3222D19.5,CTD-3222D19.7,MED26,RN7SL146P,SLC35E1,SMIM7,TMEM38A	S1(4.8)	0
chr3	52931612	53080500	149	3p21.1	0.274	RP11-894J14.5,SFMBT1	S1(5.1)	0
chr8	67195500	67344500	149	8q13.1	0.065	ADHFE1,RP11-346I3.4,RRS1	S1(5.2)	0
chrX	109413500	109562500	149	Xq23	1.07	AMMECR1,AMMECR1-IT1,SNORD96B,TMEM164	S1(5.4)	0
chr2	172602500	172751500	149	2q31.1	0.523	AC068039.4,DYNC1I2,RNU6-182P,SLC25A12	S1(5)	0
chr13	30733758	30882500	149	13q12.3	1.907	AL356750.1,KATNAL1,PRDX2P1,RNU6-64P	S1(5.2)	0
chr20	31024500	31173500	149	20q11.21	0.149	ASXL1,C20orf112,RP11-410N8.1,RP11-410N8.3,RP5-1184F4.5	S1(5.3)	0
chr11	87632500	87831315	149	11q14.2	0.016	RP11-164N3.1,RP11-164N3.2	S3(3.4)	0
chr5	54602500	54751500	149	5q11.2	0.944	DHX29,PPAP2A,RP11-506H20.2,SKIV2L2	S1(4.7)	0
chr7	112430647	112579971	149	7q31.1	0.768	C7orf60	S3(2.7)	0
chr7	141250500	141399500	149	7q34	0.54	AGK,KIAA1147,RP11-744I24.2,RP5-894A10.2,RP5-894A10.6	S4(2.3)	0
chr1	153746500	153895451	149	1q21.3	0.948	GATAD2B,INTS3,RP11-216N14.5,RP11-216N14.7,RP11-759F5.1,SLC27A3,Y_RNA:333	G1(5.5)	0
chr8	41508855	41656500	148	8p11.21	0.413	ANK1,MIR486,RP11-930P14.1	S1(4.9)	0
chr7	98598500	98746500	148	7q22.1	1.842	AC004893.11,SMURF1,TRRAP	S1(4.9)	0
chr1	59347500	59495500	148	1p32.1	0.041	PHBP3,RP4-794H19.1,RP4-794H19.2,RP4-794H19.4	S1(5.2)	0
chr7	43622500	43770500	148	7p13	0.749	COA1,STK17A	S1(5.1)	0
chr17	37410550	37558776	148	17q12	0.394	AC005288.1,CTB-131K11.1,FBXL20	S1(5.1)	0
chr16	48276500	48424500	148	16q12.1	1.05	ABCC11,LONP2,SIAH1,UBA52P8	S2(3.7)	0
chr3	31568500	31716500	148	3p23	1.193	OSBPL10,STT3B	S3(3.1)	0
chr12	123010500	123158500	148	12q24.31	0.298	HCAR1,KNTC1,RP11-324E6.8,RSRC2	G1(5.5)	0
chr9	91002500	91150015	148	9q22.1	1.776	HNRNPA1P14,RP11-317B17.3,SPIN1	S1(4.6)	0
chr5	31385500	31533500	148	5p13.3	0.843	C5orf22,DROSHA,Y_RNA:584	S2(4.3)	0
chr1	85527500	85675500	148	1p22.3	0.028	MIR4423,SYDE2,WDR63	S1(5.1)	0
chr9	99999500	100147500	148	9q22.33	0.128	CCDC180,MIR1302-8,RP11-23J9.4,RP11-23J9.5,RP11-23J9.6,RP11-23J9.7,RP11-498P14.5	S3(3.1)	0
chrX	114320500	114468500	148	Xq23	0.16	LRCH2,RBMXL3,RPL36P18,SNORA35:3,Y_RNA:788	S1(4.8)	0
chr2	86703500	86851500	148	2p11.2	0.755	AC015971.1,AC015971.2,CHMP3,KDM3A,RNF103,RNF103-CHMP3,RNU6-640P	S3(3.1)	0
chr11	66885500	67033880	148	11q13.2	1.195	AP001885.1,KDM2A,snoU13:29	G1(5.5)	0
chr5	136193316	136341500	148	5q31.1-2	0.021	CTB-1I21.2,RNA5SP193,SPOCK1	S3(3.2)	0
chr2	10687500	10835500	148	2p25.1	0.861	AC092687.5,NOL10,RN7SL832P	S1(5.1)	0
chr17	11923500	12070500	147	17p12	1.602	MAP2K4,MIR744,RNU11-2P,RP11-471L13.3,RPL21P122	S3(3.1)	0
chr5	78907500	79054575	147	5q14.1	1.123	CMYA5,PAPD4	S2(3.8)	0
chr19	41283500	41430500	147	19q13.2	0.541	CTC-490E21.10,CTC-490E21.12,CTC-490E21.13,CYP2A6,CYP2A7,CYP2B7P1,CYP2F1P,CYP2G1P,CYP2T2P,EGLN2,MIA-RAB4B,RAB4B,RAB4B-EGLN2	S1(5.1)	0
chr9	77702500	77849500	147	9q21.13	0.509	NMRK1,OSTF1,RNU6-1228P,Y_RNA:763	S2(3.5)	0
chr1	35876500	36023551	147	1p34.3	0.785	KIAA0319L,NCDN,RNY5P1,RP4-728D4.3,ZMYM4	S1(5)	0
chr2	10441500	10588819	147	2p25.1	0.876	HPCAL1,ODC1,SNORA80B	S1(5.4)	0
chr12	24956500	25103500	147	12p12.1	1.143	AC026310.1,BCAT1,RP11-625L16.3,RP11-662I13.2	S3(3.3)	0
chrX	77166193	77313500	147	Xq21.1	0.184	ATP7A,PGAM4,RP5-1000K24.2	S2(4.2)	0
chr10	127583500	127730500	147	10q26.2	0.023	ADAM12,DHX32,FANK1,FANK1-AS1,RP11-295J3.3	S2(3.5)	0
chr1	198764500	198911500	147	1q32.1	1.366	MIR181A1,MIR181A1HG,MIR181B1	S2(4.3)	0
chr10	93682500	93829500	147	10q23.32	0.909	BTAF1,CPEB3	S1(4.8)	0
chr11	85634725	85781500	147	11q14.2	3.534	PICALM,SLC25A1P1	S1(5.1)	0
chr12	40617500	40764500	147	12q12	0.093	AC079630.4,AC084290.2,LRRK2	S4(2.2)	0
chr11	78140882	78287500	147	11q14.1	0.735	NARS2,RP11-452H21.1,RP11-843A23.1	S1(4.7)	0
chr2	237993500	238140500	147	2q37.3	0.313	AC105760.2,AC107079.1,COPS8	G1(5.7)	0
chr3	121118500	121265500	147	3q13.33	0.443	POLQ,RPL7AP11,STXBP5L	S3(2.5)	0
chr9	123691451	123838500	147	9q33.2	0.082	C5,CNTRL	S1(5.4)	0
chr14	53474500	53621500	147	14q22.1	0.421	AL356020.1,DDHD1,RP11-368P15.1,RP11-368P15.2,RP11-368P15.3,RP11-547D23.1	S1(4.9)	0
chr8	79572500	79718500	146	8q21.12	0.218	IL7,PRKRIRP7,RP11-578O24.2,ZC2HC1A	S3(3.3)	0
chr3	138183500	138329500	146	3q22.3	0.359	CEP70,ESYT3,FAIM	S1(4.6)	0
chr2	20878692	21024500	146	2p24.1	0.601	AC012065.7,C2orf43	S1(4.8)	0
chr10	79541634	79687500	146	10q22.3	1.227	AL391421.1,DLG5,DLG5-AS1,RN7SL284P,RP13-39P12.3	G1(5.5)	0
chr3	120170100	120316500	146	3q13.33	0.148	AC126182.1,NDUFB4,RP11-359H3.1,RP11-359H3.4	S1(5.1)	0
chr13	27600500	27746500	146	13q12.13	1.384	USP12,USP12-AS1,USP12-AS2	S1(5.1)	0
chr20	25420500	25566153	146	20p11.21	0.746	GINS1,NINL	S1(4.9)	0
chr17	3900500	4046314	146	17p13.2	1.17	RNA5SP434,ZZEF1,snoU13:129	S1(5)	0
chr10	104000500	104146500	146	10q24.32	1.335	AL160011.1,GBF1,PITX3	G1(5.6)	0
chr10	111764500	111910500	146	10q25.1-2	0.869	ADD3,SNRPGP12	S1(4.9)	0
chr7	24612500	24758500	146	7p15.3	0.307	CTA-298G8.1,CTA-298G8.2,DFNA5,MPP6	S2(4.1)	0
chr13	41706500	41852500	146	13q14.11	0.041	CALM2P3,KBTBD6,KBTBD7,MORF4L1P4,MTRF1,snoU13:71	S1(4.9)	0
chr13	113115500	113261500	146	13q34	0.948	TUBGCP3	S3(3.3)	0
chr17	19135500	19281033	146	17p11.2	0.676	B9D1,EPN2,EPN2-AS1,MIR1180,RP11-135L13.4	G1(5.5)	0
chr19	48102500	48248778	146	19q13.33	1.72	CTD-2571L23.8,CTD-3001H11.1,EHD2,GLTSCR1	S1(4.9)	0
chr14	103243812	103389500	146	14q32.32	0.864	AL117209.1,AMN,RNU6-1316P,TRAF3,snoU13:77	S1(5.3)	0
chr17	28256500	28402500	146	17q11.2	0.04	AC104984.4,AC104996.1,EFCAB5,RNY4P13,RP11-1148O4.1,RP11-338L22.3,SSH2	S1(5)	0
chr5	131745500	131891710	146	5q31.1	0.279	AC116366.5,AC116366.6,C5orf56,IL5,IRF1,Y_RNA:573	G1(5.5)	0
chr12	95467479	95612500	145	12q22	0.612	FGD6,RP11-129B9.1,RP11-129B9.2,VEZT	S1(4.5)	0
chr9	21801500	21946500	145	9p21.3	1.097	AL359922.1,MTAP,RP11-145E5.5,RP11-149I2.5,RP11-70L8.4,TUBB8P1	S1(5.3)	0
chr5	40611500	40756077	145	5p13.1	0.287	PTGER4,SNORA63:10,TTC33	S2(4.2)	0
chr13	41495910	41640500	145	13q14.11	1.827	ELF1,RGS17P1,WBP4	S1(4.9)	0
chr1	90097500	90242500	145	1p22.2	0.576	LRRC8C,RP11-302M6.4,RP11-413E1.2,RP11-413E1.4,RP5-1007M22.2,snoU13:209	S1(4.6)	0
chr14	102829299	102974500	145	14q32.31	0.443	ANKRD9,RNU6-244P,TECPR2	G1(5.5)	0
chr3	153838500	153983500	145	3q25.2	0.019	ARHGEF26,ARHGEF26-AS1	S4(2)	0
chr20	43595114	43740500	145	20q13.12	1.257	KCNS1,STK4,WFDC5,Y_RNA:373	S1(4.9)	0
chr14	103850500	103995520	145	14q32.32	1.59	CKB,MARK3,RP11-600F24.2,RP11-600F24.7	G1(5.6)	0
chr21	37529079	37674500	145	21q22.12	0.417	DOPEY2,RN7SL73P,RPL3P1,SRSF9P1,snoU13:218	S1(5.4)	0
chr3	25496500	25641500	145	3p24.2	0.019	RARB,SNORD5:2,TOP2B	S3(3.1)	0
chr8	54790500	54935500	145	8q11.23	0.658	RGS20,RNU6-1331P,RP11-1070A24.1,RP11-30L15.4,TCEA1	S1(4.8)	0
chr1	45308735	45453500	145	1p34.1	0.438	AL136380.1,CCNB1IP1P1,EIF2B3,RNA5SP47,RP5-882O7.1	S1(5.2)	0
chr4	48127500	48272500	145	4p11-12	0.044	TEC,TXK,Y_RNA:534	S1(4.8)	0
chr21	30449791	30594641	145	21q21.3	0.157	AF124730.4,BACH1,LINC00189,MAP3K7CL,RPL12P9,U3:38,Y_RNA:396	G1(5.5)	0
chr13	49874500	50019500	145	13q14.2	0.2	AL136218.1,CAB39L,SETDB2	S1(5)	0
chr10	53934500	54079500	145	10q21.1	0.067	DKK1,PRKG1,PRKG1-AS1	S1(5)	0
chr1	236304500	236449500	145	1q42.3	0.173	ERO1LB,GPR137B,RNU2-70P,RP11-478H16.1	S2(3.9)	0
chr15	99791500	99936500	145	15q26.3	0.23	AC022819.1,AC022819.2,HNRNPA1P62,HSP90B2P,LRRC28,RP11-20G13.3,RP11-616M17.1	S2(3.9)	0
chr15	72524164	72669500	145	15q23	0.716	CELF6,HEXA,HEXA-AS1,PARP6,RP11-106M3.2,RP11-106M3.3	S1(5.3)	0
chr6	140839500	140984500	145	6q24.1	0.032	AL356137.1	S2(4.1)	0
chr6	7958500	8103500	145	6p24.3	0.382	BLOC1S5,BLOC1S5-TXNDC5,EEF1E1,EEF1E1-BLOC1S5,PIP5K1P1,TXNDC5	S3(3.2)	0
chr1	5908500	6053500	145	1p36.31	0.29	AL356261.1,KCNAB2,MIR4689,NPHP4	S3(3.4)	0
chr10	180500	325500	145	10p15.3	0.882	AL603831.1,DIP2C,RNA5SP297,ZMYND11	S2(4.2)	0
chr14	51182500	51327500	145	14q22.1	0.713	NIN,PYGL,RP11-218E20.2,RP11-248J18.3,RP11-286O18.1,snoU83B	S1(5.4)	0
chr9	4792500	4936500	144	9p24.1	0.283	AL158147.2,MIR101-2,RCL1,RP11-125K10.5,RP11-307I14.3	S2(4.2)	0
chr7	28724500	28868500	144	7p14-15	0.044	CREB5	S3(2.7)	0
chr1	65288500	65432187	144	1p31.3	1.555	JAK1,RAVER2,RP11-182I10.1,RP11-182I10.2	S2(4.2)	0
chr10	101630500	101774500	144	10q24.2	2.921	DNMBP,DNMBP-AS1	S1(5.3)	0
chr7	55497500	55641500	144	7p11.2	1.286	LANCL2,RP11-310H4.1,VOPP1	S2(4.3)	0
chr10	96161500	96305546	144	10q23.33	0.587	TBC1D12	S2(4.4)	0
chr15	49112500	49256500	144	15q21.1	0.072	AC012379.1,EID1,RP11-138E16.1,SHC4	G1(5.6)	0
chr2	55702500	55846015	144	2p16.1	0.763	CCDC104,RNU6-634P,RP11-554J4.1,SMEK2,SNORA12:2	S1(4.8)	0
chr3	124475500	124619500	144	3q21.2	1.041	ENO1P3,ITGB5,ITGB5-AS1	G1(5.5)	0
chr4	141535500	141679500	144	4q31.21	0.518	RP11-102N12.2,RP11-102N12.3,TBC1D9,TNRC18P1,Y_RNA:545	S3(3.4)	0
chrX	37207500	37351500	144	Xp21.1	0.673	FTH1P19,PRRG1,RP11-357K9.2,TM4SF2	S4(2.4)	0
chr3	37283500	37427759	144	3p22.2	2.327	AC097359.1,GOLGA4,RNA5SP129,RP11-259K5.2,TCEA1P2	G1(5.5)	0
chr3	190230500	190374500	144	3q28	0.287	GCNT1P3,IL1RAP,RN7SKP296	S3(3.1)	0
chr2	66657500	66801161	144	2p14	6.513	MEIS1,MEIS1-AS1,MEIS1-AS2,MEIS1-AS3	S3(3.2)	0
chr1	77541500	77685500	144	1p31.1	0.241	PIGK,RP11-363H12.1,RP4-564M11.2,RP4-706A16.3	S1(4.7)	0
chr11	43380481	43524500	144	11p11-12	1.329	RN7SKP287,RP11-484D2.2,RP11-484D2.3,RP11-484D2.4,RP11-484D2.5,TTC17	S2(3.6)	0
chr5	133418500	133562500	144	5q31.1	1.957	CDKL3,CTD-2410N18.3,CTD-2410N18.4,CTD-2410N18.5,MIR3661,PPP2CA,SKP1,TCF7	S1(5.3)	0
chr13	27130500	27274500	144	13q12.13	0.825	RPS3AP44,WASF3,WASF3-AS1	S2(3.6)	0
chr4	15421656	15565876	144	4p15.32	0.177	AC007016.3,C1QTNF7,CC2D2A,RP11-665G4.1,RP11-799M12.2	S2(4.3)	0
chr10	45948569	46091500	143	10q11.21	0.601	2014-03-08	S3(3.1)	0
chr13	99087500	99230500	143	13q32.2	2.355	FARP1,FARP1-AS1,RP11-295B17.6,STK24,STK24-AS1	S1(4.8)	0
chr18	45315500	45458500	143	18q21.1	1.486	RP11-380M21.2,RP11-380M21.4,SMAD2	S3(3)	0
chr8	87354500	87497058	143	8q21.3	0.785	CTD-2284J15.1,NTAN1P2,RMDN1,WWP1	S4(2)	0
chr10	79398353	79541634	143	10q22.3	0.127	RNU6-1266P,RP11-428P16.2,RP13-39P12.2	S1(5.3)	0
chr5	94748500	94891500	143	5q15	0.874	ARSK,CTD-2538A21.1,FAM81B,RNU6-308P,TTC37	S1(4.5)	0
chr7	41600500	41743500	143	7p14.1	0.342	AC005027.3,INHBA,INHBA-AS1	S2(4)	0
chr2	175409500	175552500	143	2q31.1	1.392	AC010894.5,AC018890.6,RNU6-5P,WIPF1	S1(4.8)	0
chr11	66583500	66726500	143	11q13.2	0.185	C11orf80,LRFN4,MIR3163,PC,RCE1,RNU7-23P	S1(5.3)	0
chr14	60982500	61125500	143	14q23.1	0.124	RP11-1042B17.1,RP11-1042B17.2,RP11-1042B17.3,RP11-1042B17.4,RP11-1042B17.5,SIX1,U3:10	S1(4.7)	0
chr2	38140500	38283500	143	2p22.2	0.176	RMDN2,RMDN2-AS1	S1(4.9)	0
chr10	27246500	27389421	143	10p12.1	0.269	ANKRD26,RNU6-490P	S2(3.5)	0
chr1	180849500	180992500	143	1q25.3	0.74	AL162431.1,KIAA1614,RP11-46A10.2,RP11-46A10.4,RP11-46A10.5,RP11-46A10.6,RP11-46A10.8,STX6,XPR1	S1(5.3)	0
chr11	107186997	107329500	143	11q22.3	0.416	CWF19L2,SMARCE1P1	S3(2.7)	0
chr17	60005377	60148500	143	17q23.2	2.265	AC018628.1,MED13,RN7SL800P,Y_RNA:228	S2(4)	0
chr1	21530500	21672500	142	1p36.12	0.913	ECE1,RP3-329E20.2,RP5-1071N3.1	G1(5.5)	0
chrX	39894500	40036500	142	Xp11.4	0.328	BCOR	S2(4.1)	0
chr17	13971500	14113804	142	17p12	0.714	COX10,COX10-AS1,SNORA74:4	S3(3)	0
chr1	4714500	4856500	142	1p36.32	0.522	AJAP1	S4(1.9)	0
chrX	73640500	73782500	142	Xq13.2	0.755	HNRNPA1P25,RN7SL641P,SLC16A2	S1(4.7)	0
chr18	59849500	59991500	142	18q21.33	1.1	KIAA1468,PIGN,RP11-173A16.1,RP11-173A16.2	S2(4)	0
chr1	19394500	19536770	142	1p36.13	2.301	AL137127.1,RP5-1126H10.2,UBR4	S1(5.2)	0
chr10	122215500	122357720	142	10q26.12	0.469	AC073587.1,PPAPDC1A	S3(3.2)	0
chr14	55352931	55494500	142	14q22.2	0.254	AL160471.6,GCH1,SOCS4,WDHD1	S1(5.2)	0
chr17	6774500	6916500	142	17p13.1	0.25	AC027763.2,AC040977.1,ALOX12,ALOX12P2,RNASEK,RNASEK-C17orf49,RP11-530N7.2,RP11-530N7.3,RP11-589P10.5,RP11-589P10.7	S2(3.9)	0
chr15	42564500	42706500	142	15q15.1	0.271	CAPN3,GANC,RP11-164J13.1,RP11-546B15.2,TMEM87A,ZNF106	S1(5.3)	0
chr1	116518500	116660500	142	1p13.1	0.891	MAB21L3,RP11-159M11.2,SLC22A15	S3(3.4)	0
chr8	30373500	30515768	142	8p12	0.756	CTD-2373N4.5,GTF2E2,RBPMS,RNU5A-3P,SMIM18	S1(4.9)	0
chr17	57042500	57184282	142	17q22	0.741	AC099850.1,AC100832.1,PPM1E,RN7SL716P,RP11-579O24.3,TRIM37	S3(3.4)	0
chr19	5198500	5340500	142	19p13.3	0.443	PTPRS,RPL32P34	S1(4.8)	0
chr15	90931449	91073156	142	15q26.1	2.83	IQGAP1,RP11-154B12.3	G1(5.5)	0
chr14	67684500	67826982	142	14q23.3	0.554	ATP6V1D,EIF2S1,FAM71D,MPP5,Y_RNA:138	S1(5.3)	0
chr6	57037123	57179602	142	6p11.2	0.352	BAG2,RAB23,RP11-203B9.4	S1(5.3)	0
chr18	48494360	48636500	142	18q21.2	1.303	ELAC1,RN7SL695P,RP11-729L2.2,SMAD4	S2(3.9)	0
chr2	158592517	158733500	141	2q24.1	1.836	AC013731.1,ACVR1,UPP2	S3(3.3)	0
chr4	15565876	15706500	141	4p15.32	1.662	BST1,CC2D2A,FAM200B,FBXL5	S2(4.4)	0
chrY	14392500	14533500	141	Yq11.21	0.239	AC002992.1,ARSDP1,ARSEP1,FAM8A4P,GYG2P1,RN7SL702P	NULL	0
chr9	123962500	124103624	141	9q33.2	1.457	GSN,GSN-AS1,RAB14,RN7SL181P,RP11-477J21.2,RP11-477J21.6,STOM	G1(5.5)	0
chr8	17775500	17916500	141	8p22	1.163	ASAH1,PCM1	S3(3.4)	0
chr11	82997170	83138500	141	11q14.1	0.029	CCDC90B,CTD-2240G15.1,RP11-727A23.10	S3(3.4)	0
chr6	64344500	64485500	141	6q12	0.983	EYS,PHF3	S3(3.1)	0
chr6	34524110	34665500	141	6p21.31	1.039	C6orf106,RN7SL200P,RP11-140K17.3,RP3-391O22.1,RP3-391O22.2,RP3-391O22.3,snoU13:367,snoU13:368	S1(5.1)	0
chr20	4310500	4451500	141	20p13	0.063	RP11-307O10.1	G1(5.5)	0
chr21	15398500	15539500	141	21q11.2	0.199	ANKRD20A18P,AP001347.6,ERLEC1P1,LIPI,RNA5SP488	S4(1.9)	0
chr12	16064105	16205500	141	12p12.3	0.89	DERA,RP11-674J14.3	S1(4.5)	0
chr6	130340500	130481500	141	6q23.1	0.349	L3MBTL3,RP11-73O6.3,SAMD3	S2(4.4)	0
chr10	104263500	104404252	141	10q24.32	0.509	RN7SL21P,RNU6-43P,RP11-170J3.2,RP11-47A8.5,SUFU	G1(5.6)	0
chr14	78265500	78406500	141	14q24.3	0.257	ADCK1,Y_RNA:158	S2(3.7)	0
chr7	156930500	157071500	141	7q36.3	1.511	RP4-814D15.1,RP4-814D15.2,RP5-1142J19.2,UBE3C	S1(5.2)	0
chr7	92860500	93001500	141	7q21.3	0.501	CCDC132	S3(3.2)	0
chr8	12294500	12435500	141	8p23.1	0.029	AC130352.1,ENPP7P6,RP11-419I17.1,RPS3AP34	S3(3.2)	0
chr8	54615500	54756500	141	8q11.23	1.35	ATP6V1H,RP11-463C14.1	S1(4.7)	0
chr13	32973500	33114500	141	13q13.1	1.126	ATP8A2P2,BRCA2,N4BP2L1,N4BP2L2,RP11-298P3.4,SNORA16:1	S1(4.5)	0
chr18	8700500	8841500	141	18p11.22	2.313	RP11-674N23.1,RP11-674N23.4,SOGA2,Y_RNA:274	S1(5)	0
chr7	30323500	30464287	141	7p14.3	0.371	AC006978.6,MIR550A1,NOD1,ZNRF2	S1(4.5)	0
chr2	75683704	75824500	141	2p12	0.924	AC007099.1,AC007099.2,EVA1A,snoU109:6	G1(5.5)	0
chr22	23522500	23662500	140	22q11.23	0.582	BCR,FBXW4P1,RN7SL263P	S2(3.6)	0
chr12	80862500	81002500	140	12q21.31	0.025	PTPRQ,RP11-272K23.3,RP11-272K23.4	S1(5)	0
chr10	70318500	70458256	140	10q21.3	0.688	COX20P1,RP11-119F7.3,TET1	S1(5.4)	0
chr15	50838905	50979012	140	15q21.2	1.562	RP11-120K9.2,TRPM7	S1(4.9)	0
chr15	43663223	43802926	140	15q15.3	0.551	RN7SL487P,TP53BP1,TUBGCP4	S1(5.2)	0
chr9	127014500	127154500	140	9q33.3	2.882	AL137846.1,NEK6,PSMB7,RP11-121A14.2,RP11-121A14.3	S1(5.1)	0
chr10	27015500	27155500	140	10p12.1	1.668	ABI1,PDSS1,RNU6-946P,SNORA57:1	S3(3.4)	0
chr17	33308097	33448541	140	17q12	0.813	LIG3,RAD51D,RAD51L3-RFFL,RFFL,RNU6-840P,RP5-837J1.1,RP5-837J1.2,RP5-837J1.4,Vault:2,snoU13:138	S2(3.7)	0
chr11	111957496	112097087	140	11q23.1	0.193	AP002884.3,BCO2,IL18,MRPS36P4,RP11-356J5.4,RP11-356J5.5,RPS12P21,SDHD,TEX12,TIMM8B	S1(5.3)	0
chr2	219294500	219434500	140	2q35	0.379	RN7SKP38,RQCD1,USP37,VIL1	S1(5.4)	0
chr5	102454500	102594402	140	5q21.1	0.85	CTC-503K11.2,GIN1,PPIP5K2	S1(5)	0
chr7	138144500	138284500	140	7q33-34	0.568	AC013429.5,SVOPL,TRIM24,snoU13:401	S3(2.9)	0
chr6	87860500	88000500	140	6q14-15	1.945	GJB7,RP11-393I2.2,RP11-393I2.4,ZNF292	S2(3.9)	0
chr1	119544028	119684500	140	1p12	0.549	RBMX2P3,RP11-418J17.1,RPS3AP12,WARS2,WARS2-IT1	S3(3.1)	0
chrX	149927500	150067500	140	Xq28	0.514	CD99L2,MTMR1,RP11-316K19.3	S2(4)	0
chr5	99731500	99871500	140	5q21.1	0.029	CTD-2001C12.1,FAM174A,RP11-346J10.1	S4(1.5)	0
chr5	33984667	34124633	140	5p13.2	0.382	AMACR,C1QTNF3,RP11-1084J3.3,RP11-1084J3.4,SLC45A2	S1(5)	0
chr19	17186500	17326154	140	19p13.11	1.428	CTD-2528A14.5,CTD-3032J10.2,CTD-3032J10.3,CTD-3032J10.4,MYO9B	S1(5)	0
chr2	216806442	216946500	140	2q35	0.138	MREG,PECR	S1(5.2)	0
chr11	3679500	3819022	140	11p15.4	1.909	ART1,CHRNA10,NUP98,PGAP2,RNU6-1143P,RNU7-50P,Y_RNA:61,Y_RNA:62,snoU13:25	S1(5.1)	0
chr1	93287500	93427500	140	1p22.1	0.48	FAM69A,RP11-386I23.1,RPL5,SNORA51:2,SNORA66:1,SNORA66:2,SNORD21	S1(5.2)	0
chr3	15423500	15563258	140	3p25.1	0.14	COLQ,EAF1,EAF1-AS1,METTL6,MIR4270,RN7SL110P,RNU6-1024P	S1(5.1)	0
chr1	68559500	68699500	140	1p31.3	0.381	CTBP2P8,GNG12-AS1,MIR1262,WLS	S2(4.4)	0
chr15	44579500	44719431	140	15q15.3	0.556	AC090519.1,AC090519.3,AC090519.4,AC090519.5,AC090519.6,CASC4,RP11-516C1.1,RP11-616K22.1,RP11-616K22.2	S1(5.3)	0
chr1	243280500	243419500	139	1q43	0.931	AC092782.1,CEP170,RP11-261C10.4,RP11-261C10.5,SDCCAG8	S2(3.6)	0
chr13	32420500	32559821	139	13q13.1	0.191	EEF1DP3	S1(4.7)	0
chr10	92921500	93060500	139	10q23.32	1.031	PCGF5	S2(4.3)	0
chr4	4409500	4548500	139	4p16.2-3	1.428	NSG1,RPS7P15,STX18,STX18-AS1,STX18-IT1	S1(4.8)	0
chr9	33911120	34050500	139	9p13.3	1.142	OSTCP8,RN7SKP114,RNU7-36P,SNORD121A,SNORD121B,UBAP2,UBE2R2	S1(5.2)	0
chr1	31400500	31539500	139	1p35.2	2.684	PUM1,RP11-201O14.1,RP11-201O14.2,SNORD103A,SNORD103B,SNORD85	S1(5.2)	0
chr5	96270500	96409500	139	5q15	0.774	AC008850.3,AC008865.1,CTD-2260A17.2,LNPEP,SETP22,Y_RNA:609	S1(5)	0
chr1	28276500	28415207	139	1p35.3	0.875	EYA3,RN7SL559P,RP11-460I13.2,RP11-460I13.6,SMPDL3B,XKR8	S1(5.3)	0
chr1	84326500	84465500	139	1p31.1	0.313	RP11-475O6.1,TTLL7,TTLL7-IT1	S3(3.3)	0
chr1	94878500	95017500	139	1p21.3	0.6	ABCD3,F3	G1(5.5)	0
chr10	31475500	31614500	139	10p11.22	0.086	RNA5SP309,RP11-192P3.4,ZEB1,ZEB1-AS1	S1(5.1)	0
chr3	63850232	63989697	139	3p14.1	1.847	ATXN7	S2(4.3)	0
chr1	236957500	237096500	139	1q43	0.784	MTR,RP11-182B22.2	S4(2)	0
chr2	151417500	151556500	139	2q23.3	0.025	AC104777.1,AC104777.2,AC104777.3,AC104777.4	S1(5.1)	0
chr5	59858500	59997500	139	5q12.1	0.415	AC109133.1,CTD-2003D5.1,DEPDC1B	S3(2.6)	0
chr9	99637905	99776500	139	9q22.33	0.253	HIATL2,NUTM2G,RP11-330M2.3,RP11-330M2.4,YRDCP2	S3(3.1)	0
chr3	175013500	175152500	139	3q26.31	0.104	MIR4789,NAALADL2,RNU6-1233P	S3(3)	0
chr15	22892004	23031500	139	15q11.2	1.287	CYFIP1,NIPA2	S1(4.6)	0
chrX	54075391	54214500	139	Xp11.22	0.364	FAM120C,RP11-161N3.3,U3:80	S2(3.7)	0
chr15	25547500	25685500	138	15q11.2	2.164	RP13-487P22.1,SNHG14:3,UBE3A	S4(2.1)	0
chr14	31358897	31496500	138	14q12	1.765	AP4S1,COCH,HIGD1AP17,MIR624,RP11-829H16.3,RP11-829H16.5,STRN3	S1(4.9)	0
[truncated: 17,522 more rows]

## Sheet: mES
									number_of_CNVs
chrom	start	end	size(Kb)	band	RPKM	gene(s)	rep_timing_ratio	CNV_coverage	APH+	APH-	NT+	NT-	all
chr5	131911500	133020500	1109	5qG2	0.222	Auts2	-0.5	0.666	11	21			32
chr14	117324500	118337500	1013	14qE4	0.044	Gpc6	-1.1	0.385	5	5			10
chr5	27142500	28070500	928	5qB1	0.088	Dpp6,Gm16056,Gm16057,Gm16058,Paxip1,Speer4b	0	0
chr8	116962500	117887500	925	8qE1	0.326	5S_rRNA:112,Gm16116,Gm16117,Gm16118,Wwox	-0.8	0.484	7	7			14
chr14	28435500	29317935	882	14qA3	0.131	Erc2	-0.5	0.037		2			2
chr18	38761187	39598500	837	18qB3	0.094	9630014M24Rik,Arhgap26,Fgf1,Gm15333,Gm15334,Gm15335,Gm15336,Gm15337,Gm8302,Nr3c1	0.8	0
chr2	161654500	162486500	832	2qH2	0.08	C330008G21Rik,Ptprt	-1.1	0.543	4	4			8
chr15	30101500	30922500	821	15qB2	0.065	5S_rRNA:37,Ctnnd2,U7:22,U7:23	-1	0.28	1	3			4
chr5	19411500	20213500	802	5qA3	0.072	Magi2,SNORA17:427,U6:633,U6:634	-0.8	0
chr14	10483500	11285500	802	14qA1	0.053	Fhit,Gm16543,Gm3833	-1.2	0.253	3	2			5
chr10	89335500	90128500	793	10qC2	0.153	Anks1b,U6:21	-1	0.224		2			2
chr16	42859500	43650500	791	16qB4	0.186	BC002163,Gm10809,Gm15711,Gm15712,Gm15713,Gm9968,Mir568,Tigit,U6:256,Zbtb20	-0.5	0
chr6	98863500	99644500	781	6qD3	0.428	7SK:249,AC152987.1,Eif4e3,Foxp1,Gpr27	0.4	0
chrX	126283500	127045500	762	XqE3	0.57	Diap2,Gm14984	-0.2	0.102		1			1
chr13	110049500	110757500	708	13qD2.1-2	0.609	Gm10737,Mir1904,Mir582,Pde4d:1,Pde4d:2	0.8	0
chr7	103358500	104060500	702	7qE1	0.62	5S_rRNA:104,Gm15412,Gm15413,Gm15414,Gm15415,Gm15416,Gm8329,Mir708,Odz4	0.7	0
chr12	41999500	43075500	695	12qB1	0.066	Immp2l,Lrrn3,SNORA17:68	0.4	0.244	3				3
chr2	134610500	135303500	693	2qF3	0.035	4930545L23Rik,9630028H03Rik,Gm14036,Plcb1	-0.6	0
chr14	12384500	13076500	692	14qA1	1.203	Gm3848,Ptprg	1.2	0.081		2			2
chr5	128257500	128936500	672	5qG1.2-3	0.067	Gm17131,Gm17132,Tmem132d	-0.1	0
chr16	24393500	25059724	666	16qB1	0.915	1110054M08Rik,Lpp,Mir28,SNORA17:167,U7:40	0.4	0
chr5	81570500	82232500	662	5qD-E1	0.026	AC104196.1,Gm16054,Lphn3	-1	0.504	3	1			4
chr6	93582500	94234500	652	6qD1	0.619	Magi1,SNORA44:5,U6:704	0.9	0
chr8	49309500	49940500	631	8qB1.2	0.316	Odz3	-0.6	0
chr10	118890500	119518500	628	10qD2	0.244	4930483C13Rik,4930564G21Rik,AC162467.1,Gm16320,Grip1	-0.3	0
chr6	33358500	33979447	621	6qA3.3	1.771	Exoc4,Gm13853	0	0
chr14	77556500	78176500	620	14qD3	1.276	Enox1,Gm10132,Gm6994,SNORA17:132,n-R5s48	1.1	0
chr14	119535500	120150500	615	14qE4	0.052	Hs6st3	-0.5	0.172		1			1
chr13	103513500	104126500	613	13qD1	0.352	1700099I09Rik,Cd180,Gm17160,Gm6211,Mast4	-0.3	0
chr1	162142908	162744500	602	1qH2.1	0.235	Mir1927,Rabgap1l,SNORA17:232	0	0
chr11	34932500	35527500	595	11qA4	0.125	Gm12122,Gm12123,Mir218-2,SNORA17:33,Slit3	-0.4	0
chr12	11527500	12120500	593	12qA1.1	0.056	5S_rRNA:17,7SK:43,Gm4294,SNORA17:52	-0.9	0.031		1			1
chr10	11996500	12589500	593	10qA1	1.769	SNORA73:1,U1:3,U6:29,Utrn	0.2	0
chr1	180858500	181449500	591	1qH4	0.642	Kif26b,Smyd3	1	0
chr5	4792500	5380500	588	5qA1	0.086	AC026231.1,Cdk14,SCARNA15:2	-1.1	0.35	1	4			5
chr3	126616500	127201500	585	3qG2	0.103	Ank2,Gm16958,SNORA17:321	0.1	0
chr8	129587500	130162500	575	8qE2	1.194	5S_rRNA:106,Gm6921,Pard3	0.2	0
chr10	31999500	32572500	573	10qA4	0.057	Nkain2:2	-0.8	0.515	1	2			3
chr7	141861500	142430500	569	7qF3	0.776	Dock1,Fam196a,SNORA17:505	-0.2	0.05		1			1
chr7	122616500	123182258	566	7qF1	0.033	1110006G14Rik,Sox6	-0.5	0
chr3	86027500	86591500	564	3qF1	0.36	Dclk2,Gm3788,Lrba,Mab21l2,SNORA17:360,U1:113,U6:522	0.1	0.187		1			1
chr3	152826500	153388500	562	3qH3	0.207	7SK:185,SNORA17:323,St6galnac3	0	0
chr3	55427500	55988500	561	3qC	0.271	Mab21l1,Nbea,SNORA69	-0.9	0.082		1			1
chr13	11644500	12199500	555	13qA1	0.223	Ryr2	0.4	0
chr13	29394500	29948500	554	13qA3.1-2	1.009	AL512647.1,Cdkal1	-0.2	0
chr13	31878500	32431500	553	13qA3.2	0.13	Foxc1,Gm11379,Gm11380,Gmds	-0.7	0
chr12	80397500	80945500	548	12qC3	0.477	Rad51l1	0.9	0.051	1				1
chr10	4782500	5326500	544	10qA1	0.05	AC161829.1,Gm10097,Syne1,U6:38	-0.9	0
chr8	120801500	121342500	541	8qE1	0.083	Cdh13,SNORA17:511,U6:808	-0.7	0.172		1			1
chr4	85159500	85699818	540	4qC4	0.092	7SK:212,Gm12680,Sh3gl2,U6:618	-0.2	0.112	1				1
chr2	67403500	67942727	539	2qC1.3	0.092	Gm13603,Gm13604,Gm13607	-1	0.871	4	10			14
chr13	20182500	20720500	538	13qA2	0.358	Elmo1	0.4	0
chr19	57685500	58222500	537	19qD2	0.122	Atrnl1	-0.3	0
chr8	38524500	39060500	536	8qA4	0.072	Gm16205,Sgcz	-0.9	0
chr13	81236500	81772153	536	13qC3	0.084	9330111N05Rik,Gpr98	-0.3	0
chr19	42966500	43499500	533	19qC3	0.041	5S_rRNA:61,Gm6776,Hpse2	-0.2	0
chr13	36208500	36741500	533	13qA3.3	0.581	Fars2,Lyrm4	-0.4	0
chr11	25581500	26111500	530	11qA3.3	0.074	5730522E02Rik,SNORA61:2	-0.1	0.035	1				1
chr10	27793500	28322500	529	10qA4	1.279	AC153972.1,Ptprk	-0.4	0.097		1			1
chr9	68500500	69017500	517	9qC	0.059	F830001A07Rik,Rora	-0.5	0.039		1			1
chr1	33269500	33782500	513	1qB	0.55	1700001G17Rik,Prim2,Rab23,U6:388,U6:389	0.2	0
chr14	87034500	87542500	508	14qE1	1.022	Diap3	-0.9	0
chr5	31899307	32400500	501	5qB1	0.638	7SK:228,Bre,Gm17130,Mrpl33,Rbks	1.1	0
chr1	21451500	21952500	501	1qA4	0.055	Gm16705,Gm7658,Kcnq5	-1.1	0.29	2				2
chr11	108285500	108781662	496	11qE1	0.042	Ccdc46,Gm11666,Gm11669,Gm11671,Olfr1397-ps1	-0.9	0
chr12	84431500	84974500	493	12qD1	0.206	Dcaf4,Dpf3,Gm17284,Rbm25,Zfyve1	1	0
chr13	77260500	77753500	493	13qC1	0.126	2210408I21Rik,Ankrd32	-1	0.091		1			1
chr17	86566500	87058500	492	17qE4	0.091	Gm10309,Prkce	1.2	0
chr9	22279500	22771500	492	9qA3	0.225	Bbs9,Gm16164,Gm16165,Gm2976	0.5	0
chr17	64014500	64505500	491	17qE1.1	0.312	A930002H24Rik,Fer	0.2	0
chr2	37653500	38142500	489	2qB	0.368	Crb2,Dennd1a,Gm13556	0.6	0
chr8	75283500	75771500	488	8qB3.3	0.713	AC115798.1,F2rl3,Large,SNORA50	-0.3	0
chr2	5149500	5636500	487	2qA1	0.887	Camk1d,Ccdc3,Gm13197,Gm13216,Gm16934,U2:27	0.9	0
chr2	16276500	16762500	486	2qA2-A3	0.666	Plxdc2	-0.7	0.032	1				1
chr17	63369500	63849500	480	17qE1.1	0.381	4930405O22Rik,5S_rRNA:49,CT030727.1,Fbxl17,Gm17228,SNORA17:191	0	0.096		1			1
chr11	85166668	85646052	479	11qC	0.85	2610027K06Rik,5S_rRNA:10,8430403D17Rik,9530048J24Rik,AL596324.1,Bcas3,Mir1935,U1:13	0.9	0
chr17	67226500	67703500	477	17qE1.1	0.024	Ptprm	-1.2	0
chr13	28501500	28977500	476	13qA3.1	0.413	2610307P16Rik,Gm11362,Gm17528,Gm6081	-0.1	0
chr6	84544500	85019507	475	6qC3	1.188	7SK:247,Exoc6b,snoU13:18	0.6	0
chr1	3188500	3662500	474	1qA1	0.086	Gm1992,Xkr4	-1.4	0
chr15	72417500	72891500	474	15qD3	0.203	Gm3150,Trappc9	0.4	0
chr13	45635500	46107500	472	13qA5	0.104	5033430I15Rik,Atxn1,Gmpr	-0.2	0
chr18	84287500	84759500	472	18qE4	0.664	Zfp407	-0.4	0
chr4	83850500	84321500	471	4qC4	1.021	Bnc2,Gm12421	0.9	0
chr2	179178500	179648500	470	2qH4	0.132	Cdh4,Gm10711,Gm14300,Taf4a	0.9	0
chr4	20235500	20703500	468	4qA3	0.038	Gm11872,Gm11873,Nkain3	-1	0.047	1				1
chr1	91350500	91815500	465	1qD	0.786	5S_rRNA:66,7SK:152,Agap1	1.2	0
chr7	151158500	151623500	465	7qF5	0.023	AC127546.1,Cttn,Gm14372,Shank2	0.3	0
chr6	36789500	37250500	461	6qB1	0.181	1700111E14Rik,Dgki,Gm7452	-0.9	0
chr18	24867945	25327499	460	18qA2	0.191	5730494M16Rik,7SK:116,Fhod3	0.6	0
chr12	79327500	79787500	460	12qC3	0.26	Gphn	-0.6	0
chr8	122752500	123211500	459	8qE1	0.458	1190005I06Rik,AC114005.5,Cox4i1,Cox4nb,Gins2,Gm10614,Gse1	1.3	0
chr13	77847500	78306500	459	13qC1	0.438	Fam172a	-0.6	0
chr13	42775500	43233500	458	13qA4	0.063	7SK:59,Gm15809,Gm15810,Gm15812,Gm15813,Phactr1	0.2	0
chr14	60343500	60800500	457	14qD1	0.023	4930563I02Rik,Atp8a2,Gm16261,Gm6913,Gm9013	-0.3	0
chr12	92183500	92640500	457	12qD3	0.331	4930534B04Rik,4930544I03Rik,5430427M07Rik,7SK:42,Tshr	-0.6	0.07		1			1
chr17	50863500	51319500	456	17qC	0.249	Tbc1d5,U4:15	-0.9	0.332	3	4			7
chr1	156238500	156693500	455	1qG3	0.023	Cacna1e	-1.2	0
chr15	40486500	40941500	455	15qB3.1	0.086	Zfpm2	-0.9	0
chr1	38231500	38683500	452	1qB	0.233	Aff3,Gm16150,Gm16151,Gm16152	-0.6	0
chr15	53284500	53734500	450	15qC-D1	0.126	Gm7489,SNORA17:158,Samd12	-0.8	0
chr5	15440500	15889500	449	5qA2	0.324	Cacna2d1,Gm17320	-1	0.061	1				1
chr14	100236500	100684500	448	14qE2.3	1.369	4930517O19Rik,Gm16260,Klf12	0.5	0
chr5	21403500	21851500	448	5qA3	0.027	Dnaja1-ps,Gm10475,Gm16110,Gm16112,Gm16113,Reln	-0.1	0
chr14	21871854	22319075	447	14qA3	2.153	7SK:65,Adk,U6:179	1.1	0
chr19	28310500	28755500	445	19qC1	0.161	4933413C19Rik,D930032P07Rik,Glis3	-0.3	0
chr9	67038500	67482500	444	9qC	0.33	Mir190,Tln2	1	0
chr1	20042500	20485500	443	1qA3-A4	0.079	4930486I03Rik,Gm15795,Pkhd1,U6:426	-1.5	0
chr6	28429500	28870500	441	6qA3.3	2.142	Lrrc4,Snd1	0.5	0
chr15	41277500	41718500	441	15qB3.1	0.293	Abra,Gm16718,Oxr1	0.1	0
chr6	12258500	12698500	440	6qA1	0.06	Gm16123,Thsd7a,n-R5s160	-1.2	0
chr16	33967124	34405500	438	16qB3	0.063	Gm15829,Kalrn	0.5	0
chr15	39145500	39577477	432	15qB3.1	0.678	Rims2	0.7	0
chr16	96965500	97396500	431	16qC4	0.021	Dscam	-1.2	0.195	2				2
chrX	97170500	97597500	427	XqC3	0.066	Eda,Gm14828,Gm14829,Gm14832,Mir676	-0.5	0.127		1			1
chr13	114583500	115008500	425	13qD2.2	1.312	Arl15	1	0
chr11	88106500	88580500	424	11qC	1.663	1700106J16Rik,AL732539.1,C030037D09Rik,Gm11509,Gm11510,Gm15893,Msi2	1.5	0
chr2	17231500	17654500	423	2qA3	0.024	Gm13324,Nebl	-0.6	0
chr10	52410500	52832500	422	10qB3	0.046	Slc35f1,U6:13	-0.7	0
chr11	34125500	34597394	422	11qA4	0.026	4930403D09Rik,Dock2,Fam196b	-0.6	0
chr5	96801500	97222403	421	5qE3	0.048	Fras1	-1	0
chr13	9275500	9691500	416	13qA1	0.414	7SK:63,Dip2c,Gm17294,Zmynd11	0	0
chr12	100399500	100815500	416	12qE	0.79	3300002A11Rik,Foxn3,Gm16956	1	0
chr18	44572500	44988500	416	18qB3	0.334	A930012L18Rik,Dcp2,Mcc,Ythdc2	1	0
chr7	131126500	131542500	416	7qF3	0.117	Gm15338,Gm16496,Hs3st4,SNORA17:495	-1	0
chr6	32606500	33020500	414	6qA3.3	1.175	Chchd3,Gm14540	-0.3	0
chrX	90505500	90919500	414	XqC3	1.752	Arx,Gm14780,Gm6985,Pcyt1b,Pola1,SCARNA24	0.9	0
chr12	41172500	41585500	413	12qB1	0.256	Dock4	0.4	0
chr1	84281220	84692796	412	1qC5	0.065	AC123882.1,Dner	0.7	0
chr5	111308821	111720500	412	5qF	0.113	Gm15988,Gm15989,Mir701,Ttc28	0.9	0
chr5	36327500	36738500	411	5qB3	0.021	Afap1,Psapl1,Sorcs2	0.7	0
chr1	127780500	128191500	411	1qE3	0.033	AC124481.1,Lypd1,Nckap5	-1.3	0.187	1				1
chr17	91097500	91508500	411	17qE5	0.082	4930480K15Rik,Gm10308,Nrxn1,RP24-494L17.1	-1.1	0.418	1	5			6
chr11	113100500	113511393	411	11qE2	0.096	AL596212.1,Cog1,Gm16487,Slc39a11,Sstr2	0.8	0
chr11	107793500	108203500	410	11qE1	0.082	AL645963.1,Gm11655,Gm11657,Prkca	-0.3	0
chr3	28161500	28570500	409	3qA3	0.03	AC114825.1,Tnik	-0.8	0
chr9	3531500	3938500	407	9qA1	0.229	Gucy1a2	-0.2	0
chr9	55393500	55799500	406	9qB	0.287	Isl2,Scaper,U6:862	0.1	0
chr1	33964500	34370500	406	1qB	2.031	Bend6,Dst,Gm16750,U6:430	1.2	0
chr10	104606500	105011500	405	10qD1	0.047	Gm15662,Gm15663,Gm15664,Gm15666,Tmtc2	-1.2	0.349	1	2			3
chr1	61685500	62090500	405	1qC2	0.032	4930448K12Rik,Pard3b	-1.2	0.066		1			1
chr7	71896500	72301500	405	7qC	0.052	AC123823.1,Apba2,Fam189a1,Ndnl2	0.3	0
chr8	24779500	25182500	403	8qA2	0.139	Zmat4	-0.1	0
chr4	57582500	57978500	396	4qB3	0.395	AF064781,Akap2,D630039A03Rik,Gm12526,Palm2,Txn1,U6:582,U6:614	1.4	0
chr11	44426500	44822500	396	11qB1.1	0.136	Ebf1,Gm12158	-0.5	0
chr4	104039500	104434500	395	4qC6	0.508	Dab1	-0.9	0
chr8	93836500	94226500	390	8qC5	1.043	Fto,Gm3235,Rpgrip1l	-0.1	0
chr3	66788500	67178018	390	3qE1	0.573	Gm17402,Rsrc1,U6:516	-0.6	0
chr13	68749500	69138500	389	13qB3	0.042	1700001L19Rik,Adcy2	-1.2	0
chr1	53862500	54251500	389	1qC1.1	0.084	Hecw2,U1:93	0.2	0
chr18	63158500	63546500	388	18qE1	0.063	Fam38b,Napg	-0.9	0.037		1			1
chr1	142120500	142508500	388	1qF	0.139	Kcnt2	-0.1	0
chr17	75405500	75792500	387	17qE2	0.111	Gm6276,Ltbp1	-0.4	0
chr15	61825500	62212500	387	15qD1	2.714	H2afy3,Pvt1	1.3	0
chr10	66447500	66834500	387	10qB5.1	2.972	Jmjd1c,Nrbf2,Reep3,U6:44	1.3	0
chr16	72662500	73047500	385	16qC3.1	0.589	Robo1	-0.7	0.047	1				1
chr16	89776500	90161500	385	16qC3.3	0.553	AC122218.1,Tiam1	1	0
chr15	12284500	12669500	385	15qA1	0.339	AC135292.1,AC150660.1,Gm2606,Pdzd2	0.8	0
chr2	14526500	14910500	384	2qA2	0.052	Cacnb2,Gm13268,Gm13269,Gm13311,Gm13312,Gm13314,Gm13315,Gm13316	-1	0.173	1	1			2
chr5	29342500	29726500	384	5qB1	0.403	4632411P08Rik,AC171500.1,Gm7420,Lmbr1,Rnf32	0.5	0
chr5	150920500	151301500	381	5qG3	0.125	Fry,snoU13:15	0.7	0
chr8	70210500	70590500	380	8qB3.3	0.097	Gm15991,Gm15992,Psd3,SNORA17:519	-1.2	0
chr14	122932500	123312251	380	14qE5	0.188	A2ld1,Pcca	0.7	0
chr8	90130500	90509500	379	8qC3	1.081	7SK:284,Zfp423	1.6	0
chr18	25327499	25706500	379	18qA2	0.329	5730494M16Rik,AW554918,Celf4,Gm16558	0.8	0
chr12	35213754	35592500	379	12qA3	0.049	4921508M14Rik,SNORA17:56	-1.1	0.637	4	3			7
chr10	7859500	8238500	379	10qA1	0.092	Ust	-0.7	0
chr2	48803500	49181500	378	2qC1.1	0.48	Gm13509,Gm13510,Mbd5,Orc4	-0.3	0.106		1			1
chr4	85699818	86076500	377	4qC4	0.05	Adamtsl1	0.6	0.181	1				1
chr9	4419500	4796500	377	9qA1	0.074	CT030685.1,Gria4	-1	0
chr2	44407500	44783500	376	2qB	0.433	Gm13477,Gtdc1	-0.8	0
chr4	95223500	95598500	375	4qC5	0.194	Fggy	-0.9	0
chr17	85487500	85862500	375	17qE4	0.221	1700106N22Rik,Prepl	0.9	0.107		1			1
chr14	30182500	30556500	374	14qB	0.023	Cacna2d3	-0.9	0.415	1	1			2
chr14	35634500	36007500	373	14qB	0.022	Grid1,Mir346	0.2	0
chr12	13275500	13647500	372	12qA1.1	0.323	Gm6736,Nbas,U6:131,U6:132	-0.2	0
chr9	100498500	100869500	371	9qE4	2.616	Gm8661,Stag1	1.1	0
chr2	140219500	140589500	370	2qF3	0.062	Flrt3,Macrod2,U6:478	-1	0.106	1	1			2
chr6	144163500	144532500	369	6qG3	0.024	Gm15685,Sox5	-0.3	0
chr4	87714500	88083500	369	4qC4	0.424	BC057079,Gm12645,Gm12652,Mir491,Ptplad2	-0.6	0
chr2	135484746	135853500	369	2qF3	0.594	Gm14209,Gm14210,Gm14211,Plcb4,U6:477	0.1	0
chr8	63988500	64356500	368	8qB3.1	0.209	4930512H18Rik,Palld	-0.5	0
chr18	68092500	68460008	368	18qE2	0.518	4933403F05Rik,D18Ertd653e	0.8	0
chr9	6818500	7185500	367	9qA1	0.246	Dcun1d5,Dync2h1	-0.5	0.119		1			1
chr13	63065500	63431500	366	13qB3	0.571	2010111I01Rik,AC130827.1,Fancc,Gm16907,Mir23b,Mir27b	1.2	0
chr7	56501500	56866500	365	7qB4-B5	0.868	Nav2	1.3	0
chr4	99767500	100132500	365	4qC6	0.121	Gm12701,Gm12706,Ror1	-1	0
chr5	117864008	118228500	364	5qF	0.117	Ksr2	1.1	0
chr3	51546500	51909500	363	3qC	0.025	Gm10728,Maml3,n-R5s196	-0.3	0
chr11	66022500	66385500	363	11qB3	0.06	Gm12296,Gm12297,Shisa6	-1.2	0
chr5	89315500	89677500	362	5qE1	0.039	Slc4a4	-0.4	0
chr1	11404500	11766500	362	1qA2	0.113	A830018L16Rik	0	0
chrX	95726500	96087500	361	XqC3	0.074	Gm14810,Ophn1,U6:906	-0.4	0
chr1	88599500	88960500	361	1qD	0.417	Dis3l2,Gm6136	1.1	0
chr18	78947500	79307500	360	18qE3	0.25	Setbp1	-1.1	0
chr17	44902500	45262500	360	17qB3	0.246	AC165141.1,Runx2,Supt3h	-0.5	0
chr1	10981500	11340500	359	1qA2	0.446	Prex2,SNORA40:14	0.1	0
chr6	108162500	108520500	358	6qE1-E2	0.806	Gm16433,Itpr1	0.8	0
chr5	140440500	140797506	357	5qG2	0.973	Elfn1,Gm16120,Gm16121,Gm16122,Mad1l1	1.2	0
chr15	26468500	26825500	357	15qB1	0.071	Fbxl7	-1.3	0
chr4	149655754	150011500	356	4qE2	1.896	Gm13091,Gm13092,Rere,Slc45a1,U6:571	1.6	0
chr2	139548500	139904500	356	2qF3	0.679	Gm14068,Gm14070,Gm14072,Ism1,Tasp1	0.5	0
chrX	13068159	13424500	356	XqA1.1	0.459	AL671117.1,Cask,Gpr34,Gpr82	0.4	0
chr16	11405740	11760500	355	16qA1	0.202	Gm15897,Gm4279,Snx29	0.3	0
chr4	127664500	128018500	354	4qD2.2	0.048	4930465A12Rik,4930546G22Rik,Csmd2,Hmgb4	-1	0
chr17	4994500	5348500	354	17qA1	0.577	Arid1b,Gm15599	0.2	0
chr3	58809500	59162500	353	3qD	0.086	F630111L10Rik,Gm10071,Gpr171,Gpr87,Igsf10,Med12l,P2ry12,P2ry13,P2ry14	-0.9	0
chr1	194267500	194620500	353	1qH6	0.02	Hhat,Kcnh1,U5:4	0	0
chr5	136712500	137065500	353	5qG2	0.709	Cux1,Gm16599,Sh2b2	1.2	0
chr9	47325500	47676500	351	9qA5.3	0.699	Cadm1,U6:860	-0.3	0
chr4	32326500	32677500	351	4qA5	0.123	7SK:206,BC024582,Bach2,D130062J21Rik,Gm11932	0.9	0
chrX	156063500	156414500	351	XqF4	0.104	Sh3kbp1	0.5	0
chr18	65029500	65379500	350	18qE1	0.415	Nedd4l	0.1	0
chr3	109143500	109493500	350	3qF3	0.059	Vav3	-1.3	0.035		1			1
chr8	79427500	79776500	349	8qC1	0.041	Arhgap10,Nr3c2,SNORA17:540,U2:44	-1.2	0.289		2			2
chr18	75178425	75527182	349	18qE3	0.429	Dym,RP24-263P17.1	1.5	0
chr17	52740500	53089500	349	17qC	0.221	Kcnh8:1	-1.1	0.054		1			1
chr5	13974500	14322500	348	5qA1	0.608	Gm4128,Sema3e	0.2	0
chr14	99696500	100043500	347	14qE2.2	0.777	Klf5,U1:49,U2:17	1.4	0
chr4	83171448	83516500	345	4qC3	0.105	4930473A06Rik,Cbx3-ps3,U4:27	1	0
chr7	129434500	129779500	345	7qF3	0.057	7SK:262,Gm14388,Gm14389,Gm14422,Gm14423,Prkcb	0	0
chr18	69503500	69848500	345	18qE2	0.61	5S_rRNA:55,Tcf4	0.1	0
chr4	33388500	33732500	344	4qA5	1.797	AL772272.1,AL929433.1,Gm11934,Gm11935,Gm12398,Rngtt	1	0
chr1	176415500	176759500	344	1qH3	0.169	Fmn2	-0.5	0.163		1			1
chrX	49624500	49968500	344	XqA5	0.328	A630012P03Rik,Gm14582,Gpc3,Mir717	0.9	0
chr11	105450500	105791500	341	11qE1	0.164	AL627312.1,Gm11652,Gm11653,Tanc2	0.5	0
chr4	123020495	123361603	341	4qD2.2	3.215	7SK:203,Gm12924,Gm12925,Gm12926,Macf1	1.5	0
chr5	64563500	64904500	341	5qC3.1	0.305	Gm15823,Gm15824,Gm6044,Tbc1d1	1.6	0
chr9	106794310	107134240	340	9qF1	0.338	4930524O07Rik,AA543401,AL672070.1,Dock3,Gm17117,Gm17205,SNORA17:545,U6:829	1.2	0
chr5	67108500	67448500	340	5qC3.1	0.041	AC119834.1,Gm15948,Gm15949,Gm6517,Limch1	1	0
chr4	97445500	97785500	340	4qC6	0.038	Nfia	-1.1	0
chr6	92318500	92657500	339	6qD1	0.038	Prickle2	0	0
chr10	18038500	18377500	339	10qA3	0.365	D10Bwg1379e,Hebp2,Nhsl1	1.1	0
chr11	33105500	33444500	339	11qA4	2.093	Anp32-ps,Gm12116,Gm12117,Gm12118,Ranbp17	1.3	0
chr14	64736500	65074500	338	14qD1	0.15	Msra	0.9	0
chrX	165230500	165567500	337	XqF5	0.018	Arhgap6,Gm15261	-0.9	0
chr14	19389500	19726500	337	14qA2-A3	0.226	Gm15916,SNORA17:110,Ube2e2	-0.9	0
chr18	63850500	64187500	337	18qE1	0.586	Txnl1,U6:345,Wdr7	0.4	0
chr1	73835500	74172500	337	1qC3	0.092	Rufy4,Tns1	1.2	0
chr2	6458500	6794500	336	2qA1	0.134	Celf2	-1	0
chr12	78250500	78586500	336	12qC3	0.374	Fut8,U1:30,U6:122	0.4	0
chr15	32292500	32627500	335	15qB3.1	0.021	Sema5a	-1.3	0.563	2	2			4
chr9	31747500	32081500	334	9qA4	1.364	AC160635.1,Arhgap32	1.4	0
chr5	66676500	67010500	334	5qC3.1	1.148	7SK:236,Apbb2,Gm16273,Nsun7	1.4	0
chr17	72624500	72957500	333	17qE1.3	0.031	Alk,U1:72	-1	0
chr6	97235500	97568500	333	6qD3	0.184	Frmd4b,SNORA63:5,U1:170	0.8	1	1				1
chrX	40488500	40821500	333	XqA4	0.045	Gm14587,Odz1,U2:48	-0.3	0
chr4	150902500	151235500	333	4qE2	0.271	Camta1	0.9	0
chr12	32318500	32649500	331	12qA3	0.723	Bcap29,Cog5,Dus4l,Gpr22,Hbp1,Prkar2b,SCARNA17:1	0.4	0
chr15	52861500	53192500	331	15qC	2.233	Ext1	0.1	0
chr3	141500500	141831500	331	3qH1	0.065	Bmpr1b	-1.2	0
chr4	98062500	98393424	331	4qC6	0.295	AL627124.1,AL671229.1,Gm12846,Inadl	0.7	0
chr9	39935624	40265500	330	9qA5.1	1.953	1700110K17Rik,AC136021.1,Gm4893,Gramd1b,Olfr986,Scn3b,Tmem225,Zfp202	1.1	0
chr10	58277500	58607500	330	10qB4	0.073	Sept10,Sh3rf3	-0.5	0
chr15	63892010	64222500	330	15qD1	0.488	Asap1	0.2	0
chr18	7325500	7655500	330	18qA1	0.901	Fabp5l2,Mpp7	-0.3	0
chr18	75979500	76309500	330	18qE3	0.178	Zbtb7c	1.1	0
chrX	158270500	158599500	329	XqF4	0.144	Gm15202,Nhs,U6:882,U6:883	-0.1	0
chr5	14472500	14801500	329	5qA1	0.023	Pclo	-1	0
chr19	32135959	32464500	329	19qC1	0.937	2700046G09Rik,Sgms1	0.9	0
chrX	63426500	63755500	329	XqA7.1	0.063	4930447F04Rik,7SK:318	-0.6	0
chr1	194015500	194343500	328	1qH6	0.034	Hhat,Kcnh1	0.1	0.221	1				1
chr13	91062500	91390500	328	13qC3	0.073	Atg10,Gm17450,Rps23	0	0
chr11	80265500	80593500	328	11qB5	0.174	C030013C21Rik,Cdk5r1,Myo1d,Psmd11	1.3	0
chr9	97601500	97929500	328	9qE3.3	0.023	4921534H16Rik,Clstn2	-1.3	0
chr6	5652500	5980500	328	6qA1	0.027	1700019G24Rik,Dync1i1	-0.2	0
chr2	59720648	60048500	328	2qC1.1	0.421	Baz2b,Gm13570,Gm13572,Gm13574,Gm13620,Ldha-ps,March7	1.5	0
chr12	76896500	77223500	327	12qC3	0.107	AC159897.1,AC166991.1,Esr2,Syne2	1.4	0
chr12	51423500	51750500	327	12qB3	0.047	Prkd1	-1.1	0.207	1				1
chr1	99666988	99992500	326	1qD	0.131	7SK:153,B230216N24Rik,Gin1,Gm3531,Pam,U6:400	-1.1	0
chr4	153684500	154010982	326	4qE2	0.037	Gm13133,Gm13134,Prdm16	1.1	0
chr13	98651500	98976500	325	13qD1	0.108	Rgnef	1.2	0
chrX	166122500	166447500	325	XqF5	0.184	4933400A11Rik,G530011O06Rik,Gm15247,Gm15726,Gm17379,Mid1,SNORA51:6	0.7	0
chr5	48374500	48698500	324	5qB3	0.085	Mir218-1,RP23-195A18.1,RP23-195A18.2,Slit2	-1	0
chr9	28898500	29222500	324	9qA4	0.057	7SK:307,Ntm	-1.4	0.1	2				2
chr7	75095500	75418724	323	7qD1	0.366	Gm16157,Igf1r,Pgpep1l	0.5	0
chr6	66896500	67218500	322	6qC1	0.285	A430010J10Rik,E230016M11Rik,Gadd45a,Gm15644,Gm8566,Gng12,Serbp1,U1:162	1.6	0
chr9	64233500	64555500	322	9qC	0.13	Megf11	1.2	0
chr5	93110500	93432828	322	5qE2	0.309	4932430I15Rik,Mir1961,RP23-166O22.1,Shroom3	1.5	0
chrX	21477500	21798500	321	XqA2	0.084	Gm14563,U6:927	-0.2	0
chr6	52697500	53018500	321	6qB3	0.039	Gm15572,Gm15573,Jazf1,SCARNA20:3,Tax1bp1	0.4	0
chr14	79292500	79610500	318	14qD3	0.437	1300010F03Rik	0.9	0
chr6	119494336	119811500	317	6qF1	0.842	3110021A11Rik,Erc1	1.1	0
chr17	84587287	84904500	317	17qE4	1.46	Thada,U6:306,U6:319	1.5	0
chr8	14136309	14453500	317	8qA1.1	0.029	Dlgap2,Gm3160,SNORA17:525	0.6	0
chr13	24057500	24374500	317	13qA3.1	0.542	Gm11339,Gm11343,Lrrc16a,Scgn	-0.2	0.058	1				1
chr15	35327500	35644500	317	15qB3.1	1.255	Mir599,Mir875,SNORA17:142,Vps13b	0.1	0
chr1	170047500	170363500	316	1qH2.3	0.224	Pbx1	-1.3	0
chr13	95097500	95413500	316	13qD1	0.982	AC123043.1,Ap3b1,Gm9776	1	0
chr19	55390816	55705500	315	19qD2	0.654	Vti1a	1.2	0
chr5	131468500	131783500	315	5qG2	0.022	Wbscr17	-0.4	0
chr2	110476500	110791500	315	2qE3	0.473	Ano3,Muc15,Slc5a12	-1	0
chr16	57292978	57607500	315	16qC1.1	1.015	2610528E23Rik,Filip1l	-0.2	0
chr7	70589500	70901500	312	7qC	0.043	Gm5898,Otud7a,U6:750	0.1	0
chr4	109339500	109650657	311	4qC7	3.63	3010003L10Rik,Cdkn2c,Faf1,Gm12808	0.4	0
chr12	117724208	118035500	311	12qF2	0.025	Ptprn2	-0.5	0.155		1			1
chr15	86023500	86334500	311	15qE2	0.399	Tbc1d22a,U6:236	0.7	0
chr19	38553500	38864500	311	19qC3	0.097	Noc3l,Plce1	1.4	0
chr11	119463500	119774754	311	11qE2	1.185	A430071A18Rik,Gm11761,Rptor,SNORA31:2	1.5	0
chr15	65808366	66118500	310	15qD1-D2	0.148	Kcnq3	-0.4	0
chr6	133932500	134242500	310	6qG1	0.757	Etv6,Gm17088,Gm17089	1.4	0
chr17	86259500	86568500	309	17qE4	1.453	Prkce,Srbd1	0.7	0
chr2	113280500	113589500	309	2qE4	0.075	4930533B01Rik,Fmn1,Gm13963,Gm13964,Gm13966,Grem1	-1.2	0
chr7	117450500	117758500	308	7qF1	0.446	Gm10087,Gm17219,Gm9064,Sbf2	0.9	0
chr1	107253287	107561500	308	1qE2.1	0.411	2310035C23Rik,AC132082.1,Gm17634,Gm3608,Pign	-0.6	0
chr2	20436500	20744500	308	2qA3	2.907	Etl4,Gm13362	1.4	0
chr8	86881500	87189026	308	8qC3	0.442	Cacna1a,Gm16183,Ier2,SNORA9:3	1.8	0
chr15	76881100	77188500	307	15qD3-E1	2.181	1700109K24Rik,Apol6,Rbfox2,U1:56,U6:220	1.6	0
chr6	90760117	91067500	307	6qD1	0.382	Gm7749,Nup210,Rpl21-ps12,SNORA17:462	1.1	0
chr15	27648500	27955500	307	15qB1	0.391	Trio	0.2	0
chr16	50157500	50463500	306	16qB5	1.885	Bbx	0.1	0
chr5	74589500	74894500	305	5qC3.3	0.39	Gm15981,Gm15982,Rasl11b,Scfd2	0.2	0
chr7	82600500	82905500	305	7qD2	0.997	AC158749.1,Akap13,U6:751	0.6	0.05		1			1
chr6	39820500	40125500	305	6qB1	0.06	Gm5567	-0.3	0
chr10	69810500	70115500	305	10qB5.3	0.19	7SK:15,Fam13c,Phyhipl	1	0
chr1	159038811	159343500	305	1qH1	0.778	2810025M15Rik,Gm6058,Rasal2	1.1	0
chr10	36225500	36529500	304	10qB1	0.038	Hs3st5,SNORA48:2	0.1	0
chr17	30334500	30637500	303	17qA3.3	0.61	Btbd9,Gm9874,U6:294,Zfand3	1	0
chr2	59437500	59738500	301	2qC1.1	1.748	AL929160.1,Baz2b,Tanc1,Wdsub1	1.4	0
chr12	5082500	5382500	300	12qA1.1	0.028	Klhl29	0.1	0
chr7	124523500	124823500	300	7qF2	0.097	Xylt1	-0.4	0
chr5	141717500	142016500	299	5qG2	0.034	Gm16035,Gm6433,Sdk1	-1.2	0.162	1				1
chr3	57520500	57819500	299	3qD	0.393	Pfn2,Rnf13,U6:544	-0.3	0
chr7	56136500	56435500	299	7qB4	0.081	E2f8,Gm2788	1.4	0
chr1	120682500	120980500	298	1qE2.3	0.82	Gli2	1.7	0
chr5	8070500	8368160	298	5qA1	0.282	AC156022.1,Adam22,SNORA48:24	-0.2	0
chr3	27312500	27610500	298	3qA3	0.468	AC118696.1,Fndc3b	0.2	0
chrX	48736500	49033500	297	XqA5	0.223	AL672099.1,Gm14581,Hs6st2	-0.4	0
chr2	142432500	142729500	297	2qG1	0.348	4930511F01Rik,Kif16b,SNORA17:281	-1.1	0
chr11	61765500	62062485	297	11qB2	0.282	Gm12273,Gm12274,Specc1	1.1	0
chr9	118515807	118811500	296	9qF3	0.203	Gm10157,Gm2415,Itga9	1.1	0
chr9	49310500	49606500	296	9qA5.3	0.208	Gm11149,Gm17616,Ncam1	-0.2	0
chr18	40418014	40713500	295	18qB3	0.067	Kctd16	-0.1	0
chr12	83263500	83558500	295	12qD1	0.845	Sipa1l1	0.1	0
chr7	64350500	64644500	294	7qC	0.023	Gabrg3,Gm9962	-1.2	0
chr2	52715500	53009500	294	2qC1.1	0.944	Fmnl2,Gm17489,Prpf40a	0.7	0
chr1	172225500	172519500	294	1qH3	0.101	1700015E13Rik,Gm7694,Nos1ap	-0.4	0
chr10	85668500	85962500	294	10qC1	0.062	Syn3,Timp3	-0.2	0
chr12	58326500	58619500	293	12qC1	0.779	Gm11025,Gm16246,Mipol1,Prps1l3	-0.4	0.385		1			1
chr1	83988500	84281220	293	1qC5	0.986	Pid1	-0.6	0
chr16	9008500	9300500	292	16qA1	0.356		0.7	0
chr7	81408500	81700500	292	7qD2	0.058	Gm7580,Slco3a1	-1.2	0.029		1			1
[truncated: 23,409 more rows]
