# Supplementary material for: Large transcription units unify copy number variants and common fragile sites arising under replication stress
Source: Genome Res. 2015 Feb;25(2):189–200. doi: 10.1101/gr.177121.114 (PMC4315293; doi:10.1101/gr.177121.114)
Supplement: Supplemental Material [file supp_gr.177121.114_Table_S3D.xlsx]

## Sheet: 090
												number_of_CNVs
chrom	start	end	size(Kb)	band	HMM_size(Kb)	rep_timing	RPKM	txn_coverage	longest_txn_unit(Kb)	genes(>500Kb)	CNV_coverage	APH	HU	IR	NT	all
chr13	53579500	59524500	5945	13q14-21	5934	G2(1.2)	0.001	0.003	6		0.023		1			1
chr9	7564500	12426500	4862	9p23-24	4862	G2(1.2)	0.001	0.001	3	PTPRD	0
chr3	162683500	167439500	4756	3q26.1	4756	G2(1.2)	0.004	0.046	204		0
chrX	123554500	128196500	4642	Xq25	4642	G2(1.2)	0.001	0.006	11	TENM1	0
chr10	54842500	59371500	4529	10q21.1	4529	G2(1.2)	0.001	0.006	12	PCDH15	0.007		1			1
chr3	82138500	86560500	4422	3p12.1-2	4422	G2(1.2)	0.001	0.004	7	CADM2	0.005		1			1
chr2	76468500	79912500	3444	2p12	3444	G2(1.2)	0.001	0.008	12	CTNNA2,LRRTM4	0
chr4	34435500	37350500	2915	4p14-15	2915	G2(1.2)	0.001	0.001	4		0
chr7	8431500	10873500	2442	7p21.3	2442	G2(1.2)	0.001	0	0		0
chr6	61873500	63969500	2096	6q11-12	2035	G2(1.2)	0.001	0.004	6	KHDRBS2	0
chr2	139585500	141440500	1855	2q22.1	1855	G2(1.2)	0.001	0	0	LRP1B	0
chr5	20097500	30456500	10359	5p13-14	10261	G2(1.3)	0.004	0.023	139	CDH12,CDH18	0
chrX	85388500	95308500	9920	Xq21.2-33	9920	G2(1.3)	0.001	0.003	20	DACH2,PCDH11X	0.005			1		1
chrX	139205500	148396500	9191	Xq27-28	8740	G2(1.3)	0.018	0.096	499	AFF2	0
chr4	61854500	68125500	6271	4q13.1-2	6271	G2(1.3)	0.001	0.002	6	LPHN3	0
chr6	64790500	70862500	6072	6q12-13	6072	G2(1.3)	0.001	0.008	21	BAI3,EYS	0
chr8	110064500	116067500	6003	8q23.1-3	6003	G2(1.3)	0.006	0.013	35	CSMD3	0
chr6	91532500	97314500	5782	6q15-16	5653	G2(1.3)	0.009	0.017	40		0.008		2			2
chr11	37658500	43229500	5571	11p12	5571	G2(1.3)	0.001	0.003	9	LRRC4C	0
chr13	68023500	73153500	5130	13q21.32-33	5130	G2(1.3)	0.001	0.002	5		0
chr9	27683500	32269500	4586	9p21.1-2	4586	G2(1.3)	0.001	0.005	7	LINGO2	0
chr13	86422500	91035500	4613	13q31.1-3	4480	G2(1.3)	0.001	0.008	13		0
chr3	51500	4314500	4263	3p26.1-3	4263	G2(1.3)	0.012	0.01	37	CNTN4,SUMF1	0
chr16	59955500	63978500	4023	16q21	4023	G2(1.3)	0.001	0.001	4		0
chr7	144056500	147988500	3932	7q35-36	3932	G2(1.3)	0.001	0.01	25	CNTNAP2	0
chr2	80652500	84364500	3712	2p11-12	3712	G2(1.3)	0.001	0.003	6	CTNNA2	0
chr8	2201500	5829500	3628	8p23.2	3628	G2(1.3)	0.007	0.06	206	CSMD1	0
chr14	25853500	29105500	3252	14q12	3252	G2(1.3)	0.001	0.003	6	CTD-3006G17.2	0.007		1			1
chr8	82812500	85980500	3168	8q21.13-2	3168	G2(1.3)	0.001	0.007	22	RALYL	0
chr9	22911500	26066500	3155	9p21.2-3	3155	G2(1.3)	0.001	0.004	7		0.258			1		1
chr17	49834500	52930500	3096	17q21-22	3096	G2(1.3)	0.001	0.01	27	CA10	0
chr10	82517500	85570500	3053	10q23.1	3053	G2(1.3)	0.001	0	0	NRG3	0
chr2	153880500	156926500	3046	2q23-24	3046	G2(1.3)	0.001	0.007	15	GALNT13	0
chr2	115266500	118294500	3028	2q14.1	3028	G2(1.3)	0.001	0.001	2	DPP10	0
chr4	115714500	118718500	3004	4q26	3004	G2(1.3)	0.001	0.001	4		0
chr7	51347500	54261500	2914	7p11-12	2914	G2(1.3)	0.001	0.001	4		0
chr18	61888500	64556500	2668	18q22.1	2668	G2(1.3)	0.001	0.006	9		0
chr4	58529500	61206500	2677	4q12-13	2632	G2(1.3)	0.001	0.001	3		0
chr8	33668500	36280500	2612	8p12	2612	G2(1.3)	0.001	0.002	5	UNC5D	0
chrX	4002500	6576500	2574	Xp22.31-33	2574	G2(1.3)	0	0.001	3		0
chr4	96250500	98732500	2482	4q22.3	2482	G2(1.3)	0.001	0.001	3	RP11-145G20.1,STPG2	0
chr3	5592500	7991500	2399	3p26.1	2399	G2(1.3)	0.001	0	0	GRM7	0
chr5	160259500	162640500	2381	5q34	2381	G2(1.3)	0.001	0.003	6		0
chr2	193444500	195819500	2375	2q32.3	2375	G2(1.3)	0.003	0.067	102		0
chr4	130356500	132637500	2281	4q28.2-3	2281	G2(1.3)	0.001	0.002	5		0
chr11	79882500	82138500	2256	11q14.1	2256	G2(1.3)	0.001	0.005	6	RP11-179A16.1	0
chr4	166369500	168603500	2234	4q32.3	2234	G2(1.3)	0.022	0.174	325	SPOCK3	0
chr7	124711500	126755500	2044	7q31.33	2044	G2(1.3)	0.001	0.003	3	GRM8	0
chr11	20759500	22772500	2013	11p14-15	2013	G2(1.3)	0.001	0.029	51	NELL1	0
chr2	103435500	105422500	1987	2q12.1	1987	G2(1.3)	0.001	0.017	59		0
chr9	104677500	106651500	1974	9q31.1	1974	G2(1.3)	0.001	0.004	8		0
chr13	61299500	63210500	1911	13q21.2-31	1911	G2(1.3)	0.001	0.003	5		0
chr13	81252500	83146500	1894	13q31.1	1894	G2(1.3)	0.001	0	0		0
chr18	27418500	29307500	1889	18q12.1	1889	G2(1.3)	0.001	0	0		0
chr8	64343500	66215500	1872	8q12-13	1872	G2(1.3)	0	0	0	RP11-32K4.1	0
chr7	117839500	119677500	1838	7q31.31	1838	G2(1.3)	0.002	0.005	21		0
chr11	54790500	56596500	1806	11q11-12	1806	G2(1.3)	0	0	0		0
chr18	68665500	70463500	1798	18q22.2-3	1798	G2(1.3)	0.001	0	0		0
chr7	87863500	89540500	1677	7q21.12-13	1677	G2(1.3)	0.001	0.006	5	ZNF804B	0
chr7	48658500	50319500	1661	7p12.2-3	1661	G2(1.3)	0.001	0.002	3		0
chr6	123211500	124844500	1633	6q22.31	1633	G2(1.3)	0.001	0	0	NKAIN2	0
chr5	18076500	19681500	1605	5p14-15	1605	G2(1.3)	0.001	0.006	6	CDH18	0
chr4	133243500	134629500	1386	4q28.3	1386	G2(1.3)	0.001	0.013	8		0
chr6	98016500	99171500	1155	6q16.1	1155	G2(1.3)	0.001	0	0	RP11-436D23.1	0
chr21	9398500	9804500	406	21p11.2	292	G2(1.3)	0.001	0.094	67		0
chr5	44125500	51523500	7398	5p-q	4399	G2(1.4)	0.002	0.006	18		0
chr1	104047500	108471500	4424	1p13-21	4284	G2(1.4)	0.067	0.112	352		0
chr2	123093500	127261500	4168	2q14.3	4168	G2(1.4)	0.001	0.003	8	CNTNAP5	0.159	1		1		2
chr5	2089500	6208500	4119	5p15.32-33	4119	G2(1.4)	0.022	0.039	88		0
chr4	90861500	94701500	3840	4q22.1-2	3840	G2(1.4)	0.001	0	0	CCSER1,GRID2	0.159			1		1
chr14	45962500	49486500	3524	14q21.2-3	3524	G2(1.4)	0.001	0.002	6	LINC00871,MDGA2	0.055			1		1
chr8	136906500	140402500	3496	8q24.23-3	3496	G2(1.4)	0	0	0		0.224		1			1
chr3	94082500	97550500	3468	3q11.2	3468	G2(1.4)	0.005	0.028	191	EPHA6	0
chr4	160889500	164330500	3441	4q32.1-2	3441	G2(1.4)	0.001	0.008	15	FSTL5	0
chr7	56446500	64094500	7648	7p-q	3314	G2(1.4)	0.008	0.024	49		0
chr11	96851500	100139500	3288	11q21-22	3288	G2(1.4)	0.001	0.003	4	CNTN5	0.379	1				1
chr21	19410500	22670500	3260	21q21.1	3260	G2(1.4)	0.002	0.095	327	NCAM2	0.211		1			1
chrX	80150500	83213500	3063	Xq21.1	3063	G2(1.4)	0.027	0.071	162		0
chr5	163608500	166655500	3047	5q34	3047	G2(1.4)	0	0	0	CTC-340A15.2	0
chr10	65996500	69011500	3015	10q21.3	3015	G2(1.4)	0.004	0.053	151	CTNNA3	0
chr5	98674500	101676500	3002	5q21.1	2967	G2(1.4)	0.011	0.034	102		0.199			1		1
chr4	134898500	137683500	2785	4q28.3	2785	G2(1.4)	0.001	0	0		0
chr7	67220500	69989500	2769	7q11.22	2769	G2(1.4)	0.521	0.38	1220	AUTS2	0.334	4	2	2		8
chr12	81735500	84384500	2649	12q21.31	2649	G2(1.4)	0.031	0.224	448	PPFIA2	0
chr16	5679500	8316500	2637	16p13.2-3	2637	G2(1.4)	0	0	0	RBFOX1,RP11-420N3.2	0
chr4	171122500	173705500	2583	4q33-34	2583	G2(1.4)	0.001	0.005	8	GALNTL6	0
chr4	31366500	33881500	2515	4p15.1	2515	G2(1.4)	0.001	0.004	9		0
chr18	48959500	51455500	2496	18q21.2	2496	G2(1.4)	0.001	0.001	3	DCC	0
chr11	48684500	51501500	2817	11p11.12-2	2423	G2(1.4)	0	0.001	3		0
chr6	49407500	51730500	2323	6p12.3	2323	G2(1.4)	0.004	0.018	41		0
chrX	136343500	138633500	2290	Xq26-27	2290	G2(1.4)	0.001	0.006	9	FGF13	0.02			1		1
chr14	40258500	42458500	2200	14q21.1	2200	G2(1.4)	0.001	0	0		0
chr14	42894500	45079500	2185	14q21.1-2	2185	G2(1.4)	0.001	0.005	5		0
chr6	102760500	104924500	2164	6q16.3	2164	G2(1.4)	0.001	0	0		0
chr16	32334500	35301500	2967	16p11.1-2	2156	G2(1.4)	0.067	0.007	16		0
chr11	89820500	91970500	2150	11q14.3	2150	G2(1.4)	0.003	0.007	671	DISC1FP1	0
chr18	35176500	37210500	2034	18q12.2-3	2034	G2(1.4)	0	0	0	LINC00669	0
chr13	103760500	105771500	2011	13q33.1-2	2011	G2(1.4)	0.001	0.002	5		0
chr13	91183500	93186500	2003	13q31.3	2003	G2(1.4)	0.005	0.014	28	GPC5	0
chr5	103367500	105300500	1933	5q21.2-3	1933	G2(1.4)	0.001	0.004	8	RP11-6N13.1	0
chrX	78062500	79978500	1916	Xq21.1	1916	G2(1.4)	0.001	0.006	12		0.446				1	1
chr18	30113500	31998500	1885	18q12.1	1885	G2(1.4)	0.001	0	0	CCDC178	0
chr3	79596500	81479500	1883	3p12.2-3	1883	G2(1.4)	0.001	0.005	6	ROBO1	0
chrX	35227500	37024500	1797	Xp21.1	1797	G2(1.4)	0	0.002	4		0
chr14	97597500	99330500	1733	14q32.2	1733	G2(1.4)	0	0	0		0
chr5	11407500	13112500	1705	5p15.2	1705	G2(1.4)	0.001	0.002	3	CTNND2	0
chr7	152766500	154545500	1779	7q36.2	1705	G2(1.4)	0	0	0	DPP6	0
chr14	82014500	83561500	1547	14q31.1	1547	G2(1.4)	0.001	0.002	3		0.518			1		1
chr3	180668500	182207500	1539	3q26.33	1539	G2(1.4)	0.049	0.028	77	SOX2-OT	0
chr4	164434500	165964500	1530	4q32.2-3	1530	G2(1.4)	0.027	0.059	40	2014-03-01	0
chr2	34397500	35917500	1520	2p22.3	1520	G2(1.4)	0.001	0	0	AC009499.1	0
chr3	102445500	103950500	1505	3q12-13	1505	G2(1.4)	0.001	0.011	6		0
chr3	18274500	19741500	1467	3p24.3	1467	G2(1.4)	0.002	0.003	4	TBC1D5	0
chr1	49044500	50459500	1415	1p33	1415	G2(1.4)	0.001	0	0	AGBL4	0
chr1	237211500	238626500	1415	1q43	1415	G2(1.4)	0.001	0.006	6	RYR2	0
chr18	13824500	15427500	1603	18p11.1-21	1362	G2(1.4)	0.002	0.032	24		0
chr2	137168500	138522500	1354	2q22.1	1354	G2(1.4)	0.003	0	0	THSD7B	0
chr7	121839500	123141500	1302	7q31.32	1302	G2(1.4)	0.001	0.009	7	CADPS2	0
chr4	104443500	105737500	1294	4q24	1294	G2(1.4)	0.001	0.006	8		0
chr6	162059500	163352500	1293	6q26	1293	G2(1.4)	0.001	0	0	PACRG,PARK2	0
chr2	59230500	60504500	1274	2p16.1	1274	G2(1.4)	0	0.011	14	AC007092.1,RP11-444A22.1	0
chr12	16951500	18212500	1261	12p12.3	1261	G2(1.4)	0.001	0.002	3		0
chr12	61114500	62337500	1223	12q14.1	1223	G2(1.4)	0.001	0	0	FAM19A2	0.024				1	1
chr6	120126500	121281500	1155	6q22.31	1155	G2(1.4)	0.002	0	0		0
chr6	114752500	115840500	1088	6q22.1	1088	G2(1.4)	0.001	0	0	RP3-399L15.3	0
chr7	85493500	86556500	1063	7q21.11-12	1063	G2(1.4)	0.001	0	0		0
chr20	21676500	22732500	1056	20p11.21-22	1056	G2(1.4)	0	0	0		0
chr16	76115500	77153500	1038	16q23.1	1038	G2(1.4)	0	0	0		0
chr9	76224500	77230500	1006	9q21.13	1006	G2(1.4)	0.001	0.013	10		0
chr7	37091500	38068500	977	7p14.1-2	977	G2(1.4)	0.013	0.111	158	ELMO1	0
chr10	20167500	21084500	917	10p12.31	917	G2(1.4)	0.001	0	0		0
chr11	83603500	84489500	886	11q14.1	886	G2(1.4)	0.001	0	0	DLG2	0
chr18	4301500	5176500	875	18p11.31	875	G2(1.4)	0.001	0.003	3	DLGAP1	0
chr18	24318500	25188500	870	18q11-12	870	G2(1.4)	0	0	0	AQP4-AS1	0
chr8	86202500	87213500	1011	8q21.2-3	758	G2(1.4)	0.001	0	0		0
chr17	21522500	22276500	754	17p11.1-2	689	G2(1.4)	0.001	0.014	5		0
chr4	42379500	47019500	4640	4p12-13	4640	S4(1.5)	0.008	0.03	85		0.463		1			1
chr19	21704500	29180500	7476	19p-q	4386	S4(1.5)	0.026	0.083	175		0
chr12	34800500	42131500	7331	12p-q	4344	S4(1.5)	0.003	0.024	151		0.007		1			1
chrX	25228500	29294500	4066	Xp21.3	4066	S4(1.5)	0.001	0.004	7	IL1RAPL1	0.04	1				1
chr4	178870500	182283500	3413	4q34.3	3413	S4(1.5)	0.001	0.003	6		0
chr2	4123500	7535500	3412	2p25.1-3	3341	S4(1.5)	0.003	0.05	172		0
chr21	23209500	26318500	3109	21q21.1-2	3109	S4(1.5)	0.001	0.007	8		0
chrX	31353500	34440500	3087	Xp21.1-2	3087	S4(1.5)	0.001	0.004	10	DMD	0
chr9	119970500	122478500	2508	9q33.1	2508	S4(1.5)	0.025	0.041	95	ASTN2	0
chr3	88306500	93535500	5229	3p-q	2247	S4(1.5)	0	0.005	13		0
chr5	83705500	85810500	2105	5q14.3	2105	S4(1.5)	0.001	0.006	7		0
chrX	97451500	99479500	2028	Xq21-22	2028	S4(1.5)	0.001	0.002	4		0.061			1		1
chr2	211172500	213154500	1982	2q34	1982	S4(1.5)	0.004	0.084	152	ERBB4	0.149	1				1
chr15	53492500	55270500	1778	15q21.3	1778	S4(1.5)	0.001	0.008	11	UNC13C	0
chr12	73397500	75100500	1703	12q21.1	1703	S4(1.5)	0.011	0.026	33		0
chr15	23686500	25289500	1603	15q11.2	1603	S4(1.5)	0.036	0.059	198		0.807			2		2
chr2	15959500	17511500	1552	2p24.2-3	1528	S4(1.5)	0	0	0		0
chr4	69558500	71075500	1517	4q13.2-3	1517	S4(1.5)	0.001	0	0		0
chr1	190287500	191766500	1479	1q31.1-2	1479	S4(1.5)	0.001	0.003	5		0
chr15	26667500	28056500	1389	15q12	1389	S4(1.5)	0.001	0.002	3	GABRG3	0
chr1	82565500	83996500	1431	1p31.1	1369	S4(1.5)	0.002	0.013	18		0
chr11	24560500	25885500	1325	11p14.3	1325	S4(1.5)	0.001	0.002	3	LUZP2	0
chr7	108426500	109719500	1293	7q31.1	1293	S4(1.5)	0.001	0	0		0
chr7	70284500	71577500	1293	7q11.22	1293	S4(1.5)	0	0	0	CALN1,WBSCR17	0.765		1	7		8
chr10	132155500	133390500	1235	10q26.3	1235	S4(1.5)	0	0	0		0
chr5	62226500	63457500	1231	5q12.1-3	1231	S4(1.5)	0.001	0.006	8		0
chr11	30043500	31252500	1209	11p13-14	1209	S4(1.5)	0.033	0.022	27	DCDC1	0
chr12	33228500	34433500	1205	12p11.1-21	1205	S4(1.5)	0.002	0.017	21		0
chr4	11913500	13110500	1197	4p15.33	1197	S4(1.5)	0	0	0		0
chr7	96202500	97334500	1132	7q21.3	1132	S4(1.5)	0.008	0.069	78		0.3				1	1
chr7	11120500	12231500	1111	7p21.3	1111	S4(1.5)	0.047	0.086	204		0
chr21	41281500	42378500	1097	21q22.2	1097	S4(1.5)	0	0	0	DSCAM	0
chr21	10816500	15203500	4387	21p-q	1081	S4(1.5)	0.001	0.011	84		0
chr20	53319500	54390500	1071	20q13.2	1071	S4(1.5)	0.001	0	0		0
chr10	130150500	131192500	1042	10q26.2-3	1042	S4(1.5)	0	0	0		0
chr4	155106500	156140500	1034	4q31-32	1034	S4(1.5)	0.005	0.129	305		0
chr15	86789500	87819500	1030	15q25.3	1030	S4(1.5)	0	0	0	AGBL1	0
chr10	86661500	87679500	1018	10q23.1	1018	S4(1.5)	0.001	0.006	6	GRID1	0
chr8	78287500	79294500	1007	8q21.11-12	1007	S4(1.5)	0.001	0.013	10		0
chr21	31465500	32468500	1003	21q21-22	1003	S4(1.5)	0	0	0		0
chr8	87711500	88713500	1002	8q21.3	1002	S4(1.5)	0	0	0	CNBD1	0
chr15	19988500	22740500	2752	15q11.1-2	914	S4(1.5)	0	0.002	6		0.032			1		1
chr2	13493500	14388500	895	2p24.3	895	S4(1.5)	0.001	0.011	10	LINC00276	0
chr2	129780500	130626500	846	2q14-21	846	S4(1.5)	0	0	0		0
chr4	190188500	191057500	869	4q35.2	832	S4(1.5)	0.016	0.039	24		0
chr4	22774500	23602500	828	4p15.2	828	S4(1.5)	0.001	0	0		0
chr20	40779500	41605500	826	20q12	826	S4(1.5)	0	0	0	PTPRT	0
chr1	102225500	103048500	823	1p21.1	823	S4(1.5)	0.001	0	0		0
chr3	139481500	140300500	819	3q23	819	S4(1.5)	0	0	0	CLSTN2	0
chr5	88832500	89633500	801	5q14.3	801	S4(1.5)	0.001	0	0		0
chr2	22375500	23174500	799	2p24.1	799	S4(1.5)	0	0	0	AC068490.2	0
chr10	37344500	38135500	791	10p11.1-21	791	S4(1.5)	0.001	0.006	5		0
chr8	55543500	56333500	790	8q12.1	790	S4(1.5)	0	0	0		0
chr2	209410500	210183500	773	2q34	773	S4(1.5)	0.001	0.013	6		0
chr3	191422500	192195500	773	3q28	773	S4(1.5)	0.001	0	0	FGF12	0
chr1	80600500	81290500	690	1p31.1	690	S4(1.5)	0.001	0	0		0
chr12	97703500	98389500	686	12q23.1	686	S4(1.5)	0	0	0		0
chr1	238957500	239615500	658	1q43	658	S4(1.5)	0	0	0	CHRM3	0
chr5	151926500	152561500	635	5q33.1	635	S4(1.5)	0.001	0	0	AC091969.1	0
chr3	26135500	26769500	634	3p24.1-2	634	S4(1.5)	0	0	0		0
chr3	22120500	22747500	627	3p24.3	627	S4(1.5)	0	0	0	ZNF385D	0
chr20	6862500	7472500	610	20p12.3	610	S4(1.5)	0.001	0	0		0
chr4	27392500	27994500	602	4p15.1-2	602	S4(1.5)	0.001	0	0		0
chr14	18983500	20444500	1461	14q11.1-2	602	S4(1.5)	0.001	0.038	51		0
chr22	16089500	17313500	1224	22q11.1	555	S4(1.5)	0.002	0.047	57		0
chr21	9950500	10772500	822	21p11.2	513	S4(1.5)	0	0	0		0
chr10	131268500	131573500	305	10q26.3	305	S4(1.5)	0.147	1	303		0
chr12	127944500	131019500	3075	12q24.32-33	3075	S4(1.6)	0.001	0.014	24	TMEM132D	0
chr4	28874500	30939500	2065	4p15.1	2065	S4(1.6)	0.001	0.018	537		0
chr3	34415500	36336500	1921	3p22.3	1921	S4(1.6)	0.001	0	0		0
chr1	73221500	75071500	1850	1p31.1	1850	S4(1.6)	0.007	0.024	42		0
chr5	116106500	117938500	1832	5q23.1	1832	S4(1.6)	0.001	0.002	3		0
chrX	115152500	116944500	1792	Xq23-24	1729	S4(1.6)	0.001	0.006	7		0
chr6	164561500	166218500	1657	6q27	1657	S4(1.6)	0.001	0.02	25	PDE10A	0
chr16	78256500	79852500	1596	16q23.1-2	1596	S4(1.6)	0.02	0.474	881	WWOX	0.389	6		2	1	9
chr5	128290500	129790500	1500	5q23.3	1500	S4(1.6)	0.065	0.227	314		0
chrX	112363500	113792500	1429	Xq23	1392	S4(1.6)	0.001	0.002	3		0
chr3	144121500	145408500	1287	3q24	1287	S4(1.6)	0.001	0.005	6		0
chr2	56608500	57892500	1284	2p16.1	1284	S4(1.6)	0.032	0.255	294		0
chrX	42393500	43550500	1157	Xp11.3-4	1157	S4(1.6)	0.001	0	0		0
chrX	55358500	56481500	1123	Xp11.21	1096	S4(1.6)	0.016	0.104	87		0
chr1	4421500	5495500	1074	1p36.31-32	1074	S4(1.6)	0	0	0		0
chr7	20677500	21750500	1073	7p15-21	1073	S4(1.6)	0.021	0.089	95		0
chr18	75370500	76401500	1031	18q23	1004	S4(1.6)	0	0	0		0.067				1	1
chr14	84521500	85517500	996	14q31.2-3	996	S4(1.6)	0.001	0.012	9		0.136		1			1
chr10	25807500	26797500	990	10p12.1	990	S4(1.6)	0.046	0.072	152		0
chr2	184442500	185376500	934	2q32.1	934	S4(1.6)	0.001	0	0		0
chr2	142275500	143196500	921	2q22.2	921	S4(1.6)	0.001	0	0	LRP1B	0
chrX	131886500	132776500	890	Xq26.2	890	S4(1.6)	0	0	0		0
chr2	147586500	148381500	795	2q22.3	795	S4(1.6)	0.001	0.006	5		0
chr2	199042500	199834500	792	2q33.1	792	S4(1.6)	0.003	0.018	387		0
chr10	8530500	9256500	726	10p14	726	S4(1.6)	0.001	0	0		0
chr3	68084500	68800500	716	3p14.1	716	S4(1.6)	0.001	0.008	3	FAM19A1	0
chr15	46560500	47268500	708	15q21.1	708	S4(1.6)	0.001	0.013	6		0
chr4	20972500	21675500	703	4p15.2-31	703	S4(1.6)	0	0	0	KCNIP4	0
chr17	10860500	11530500	670	17p12	670	S4(1.6)	0	0	0		0
chr1	176448500	177078500	630	1q25.2	630	S4(1.6)	0.071	0.59	388		0
chr8	47073500	47687500	614	8q11.1	614	S4(1.6)	0	0	0		0
chr1	142560500	143564500	1004	1q12-21	605	S4(1.6)	0	0	0		0
chr14	106699500	107302500	603	14q32.33	603	S4(1.6)	0	0	0		0.07		1			1
chr1	75351500	75945500	594	1p31.1	594	S4(1.6)	0.001	0	0		0
chr12	99546500	100130500	584	12q23.1	584	S4(1.6)	0.001	0.017	6	ANKS1B	0.037		1			1
chr5	7119500	7690500	571	5p15.31	571	S4(1.6)	0	0	0		0
chr14	87766500	88327500	561	14q31.3	561	S4(1.6)	0	0	0		0
chr6	23624500	24173500	549	6p22.3	549	S4(1.6)	0	0	0		0
chr8	63334500	63872500	538	8q12.3	538	S4(1.6)	0	0.007	4	NKAIN3	0
chr1	72023500	72552500	529	1p31.1	529	S4(1.6)	0.001	0	0	NEGR1	0.697	6				6
chr12	20909500	21418500	509	12p12.1-2	509	S4(1.6)	0	0	0		0
chrX	75716500	76211500	495	Xq13-21	495	S4(1.6)	0.003	0.042	87		0
chr18	58316500	58795500	479	18q21.32	479	S4(1.6)	0.001	0	0		0
chr8	109500500	109973500	473	8q23.1	473	S4(1.6)	0.015	0.087	86		0.199			1		1
chr1	166293500	166762500	469	1q24.1	469	S4(1.6)	0.001	0	0		0
chr11	133090500	133553500	463	11q25	463	S4(1.6)	0	0	0	OPCML	0
chr20	12311500	12767500	456	20p12.1	456	S4(1.6)	0.002	0	0		0
chr5	106038500	106479500	441	5q21.3	441	S4(1.6)	0.001	0.011	5		0
chr9	39116500	66487500	27371	9p-q	414	S4(1.6)	0	0	10		0
chr11	37018500	37428500	410	11p12	410	S4(1.6)	0.001	0	0		0
chr22	33797500	34197500	400	22q12.3	400	S4(1.6)	0	0	0	LARGE	0
chr13	22935500	23270500	335	13q12.11	335	S4(1.6)	0	0	0		0
chr4	11048500	11342500	294	4p15-16	294	S4(1.6)	0	0	0		0
chr9	67354500	68395500	1041	9q13	100	S4(1.6)	0	0.002	17		0
chr2	49207500	52978500	3771	2p16.2-3	3771	S4(1.7)	0.001	0.001	4	AC007682.1,NRXN1	0
chrX	57173500	62628500	5455	Xp-q	2238	S4(1.7)	0.006	0.056	253		0
chr1	188446500	190172500	1726	1q31.1	1726	S4(1.7)	0.001	0	0		0
chr13	84208500	85769500	1561	13q31.1	1561	S4(1.7)	0.001	0.003	4		0
chrX	83768500	85309500	1541	Xq21.1-2	1541	S4(1.7)	0.025	0.064	99		0
chr12	85432500	86923500	1491	12q21.31-32	1491	S4(1.7)	0.001	0	0	MGAT4C	0
chrX	104274500	105590500	1316	Xq22.3	1316	S4(1.7)	0	0	0	IL1RAPL2	0
chrX	50013500	51239500	1226	Xp11.22	1226	S4(1.7)	0.001	0	0		0
chr8	51382500	52588500	1206	8q11.21-22	1206	S4(1.7)	0.001	0.01	12	SNTG1	0
chr2	185467500	186655500	1188	2q32.1	1188	S4(1.7)	0.002	0	0		0
chr7	14446500	15500500	1054	7p21.2	1054	S4(1.7)	0.003	0.069	73	DGKB	0
chrX	7559500	8574500	1015	Xp22.31	983	S4(1.7)	0.007	0.208	211		0
chrX	130247500	131139500	892	Xq26.1-2	892	S4(1.7)	0.001	0.003	3		0
chr9	87338500	88181500	843	9q21.33	843	S4(1.7)	0	0	0		0
chr2	89279500	91952500	2673	2p11.1-2	825	S4(1.7)	0	0.01	18		0
chr6	57297500	58071500	774	6p11.2	774	S4(1.7)	1.13	0.34	140		0.011				1	1
chr8	14062500	14821500	759	8p22	759	S4(1.7)	0.001	0	0	SGCZ	0
chr1	247810500	248520500	710	1q44	710	S4(1.7)	0	0	0		0
chr2	163590500	164268500	678	2q24.2-3	678	S4(1.7)	0.001	0.004	3		0
chr6	47745500	48417500	672	6p12.3	672	S4(1.7)	0.001	0.004	3		0
chr18	1290500	1928500	638	18p11.32	638	S4(1.7)	0	0	0		0
chr10	42404500	43040500	636	10q11.21	609	S4(1.7)	0.007	0.033	21		0
chr16	52227500	52830500	603	16q12.1-2	603	S4(1.7)	0	0.013	8		0
chr16	25904500	26500500	596	16p12.1	596	S4(1.7)	0	0	0		0
chr6	78472500	79066500	594	6q14.1	594	S4(1.7)	0.001	0.012	7		0
chr8	20608500	21193500	585	8p21.3	585	S4(1.7)	0	0	0		0
chr3	24744500	25281500	537	3p24.2	537	S4(1.7)	0.002	0	0		0
chrX	74668500	75180500	512	Xq13.3	512	S4(1.7)	0.001	0.01	5		0
chr13	19174500	19635500	461	13q11-12	461	S4(1.7)	0	0	0		0
chr1	60760500	61218500	458	1p32.1	458	S4(1.7)	0.001	0.026	7		0
chr9	1291500	1743500	452	9p24.3	452	S4(1.7)	0.001	0	0		0.599		1			1
chr2	148672500	149118500	446	2q22-23	446	S4(1.7)	0.698	0.827	361		0.504		1			1
chr20	37904500	38343500	439	20q12	439	S4(1.7)	0	0	0		0
chr20	26177500	29792500	3615	20p-q	436	S4(1.7)	0.005	0.05	193		0
chr5	154807500	155236500	429	5q33.2	407	S4(1.7)	0.016	0.31	978		0
chr1	175172500	175579500	407	1q25.1	407	S4(1.7)	0	0	0		0.299	1				1
chr10	1952500	2355500	403	10p15.3	403	S4(1.7)	0	0	0		0
chr6	8507500	8895500	388	6p24.3	388	S4(1.7)	0.052	0.753	350		0.583			1		1
chr10	23851500	24233500	382	10p12.2	382	S4(1.7)	0	0	0	KIAA1217	0
chr10	9891500	10271500	380	10p14	380	S4(1.7)	0	0	0		0
chrX	96194500	96567500	373	Xq21.33	373	S4(1.7)	0.291	1	949	DIAPH2	0
chr9	108805500	109158500	353	9q31.2	353	S4(1.7)	0.002	0	0		0
chr3	87534500	87871500	337	3p11.2	337	S4(1.7)	0.035	0.131	267		0
chr3	161218500	161551500	333	3q26.1	333	S4(1.7)	0	0	0		0
chr11	112728500	113060500	332	11q23.2	332	S4(1.7)	0	0	0		0
chr10	113291500	113621500	330	10q25.2	330	S4(1.7)	0.013	0.133	303		0
chr5	42100500	42426500	326	5p13.1	326	S4(1.7)	0.001	0.006	299		0
chr1	14328500	14649500	321	1p36.21	321	S4(1.7)	0.001	0	0		0
chr6	18953500	19259500	306	6p22.3	306	S4(1.7)	0	0	0		0
chr8	50326500	50621500	295	8q11.21	295	S4(1.7)	0.001	0	0		0
chr9	78066500	78357500	291	9q21.13	291	S4(1.7)	0	0	0		0
chr10	38847500	39145500	298	10p11.1	290	S4(1.7)	0.001	0	0		0.16		1			1
chr10	122826500	123088500	262	10q26.12	262	S4(1.7)	0	0	0		0
chr6	168796500	169052500	256	6q27	256	S4(1.7)	0	0	0		0
chr20	16249500	16505500	256	20p12.1	256	S4(1.7)	0	0	0		0
chr1	48665500	48918500	253	1p33	253	S4(1.7)	0.001	0	0		0
chr5	87487500	87736500	249	5q14.3	249	S4(1.7)	0.1	0.679	169		0
chr7	95279500	95525500	246	7q21.3	246	S4(1.7)	0.035	0.533	327		0
chr12	87279500	87518500	239	12q21.32	239	S4(1.7)	0.002	0.021	5		0
chr19	20627500	20863500	236	19p12	236	S4(1.7)	0.001	0.017	4		0
chr7	123589500	123812500	223	7q31.32-33	223	S4(1.7)	0.001	0	0		0
chr19	30817500	31033500	216	19q12	216	S4(1.7)	0.432	1	504		0.003			1		1
chr5	87160500	87364500	204	5q14.3	204	S4(1.7)	0.001	0	0		0
chr8	136165500	136366500	201	8q24.22	201	S4(1.7)	0	0	0		0
chr12	34556500	34734500	178	12p11.1	178	S4(1.7)	0	0	0		0
chr7	3765500	3933500	168	7p22.2	168	S4(1.7)	0	0	0	SDK1	0
chr20	38680500	38848500	168	20q12	168	S4(1.7)	0	0	0		0
chr2	387500	545500	158	2p25.3	158	S4(1.7)	0	0	0		0
chr12	103384500	103536500	152	12q23.2	152	S4(1.7)	0.001	0	0		0
chr8	43566500	43705500	139	8p11.1	139	S4(1.7)	0	0	0		0
chr9	92895500	93019500	124	9q22.2	124	S4(1.7)	0	0	0		0
chr1	48508500	48627500	119	1p33	119	S4(1.7)	0	0	0		0
chr3	180405500	180521500	116	3q26.33	116	S4(1.7)	0	0	0		0
chr6	167751500	167858500	107	6q27	107	S4(1.7)	0	0	0		0
chr6	27782500	27859500	77	6p22.1	77	S4(1.7)	0.061	1	72		0
chr10	106647500	110595500	3948	10q25.1	3948	S4(1.8)	0.001	0	0	SORCS1,SORCS3	0
chr18	39833500	42311500	2478	18q12.3	2478	S4(1.8)	0.011	0.023	405	LINC00907	0
chrX	150472500	151788500	1316	Xq28	1316	S4(1.8)	0.018	0.066	48		0
chr2	107146500	108366500	1220	2q12.2-3	1220	S4(1.8)	0	0.004	5		0
chr4	175413500	176507500	1094	4q34.1-2	1094	S4(1.8)	0.001	0	0		0
chr3	60069500	61123500	1054	3p14.2	1054	S4(1.8)	0.001	0	0	FHIT	0
chr1	69500500	70097500	597	1p31.1-2	597	S4(1.8)	0.001	0	0	LRRC7	0
chr7	119729500	120255500	526	7q31.31	526	S4(1.8)	0.208	0.652	502		0
chrX	66146500	66640500	494	Xq12	494	S4(1.8)	0.001	0	0		0
chr3	179855500	180318500	463	3q26.33	463	S4(1.8)	0.001	0.013	6		0
chr7	133218500	133565500	347	7q33	347	S4(1.8)	0.67	1	875	EXOC4	0.27	1				1
chr10	19322500	19666500	344	10p12.31	344	S4(1.8)	0.001	0	0	C10orf112	0
chr2	119078500	119409500	331	2q14.2	331	S4(1.8)	0.001	0.006	15		0
chr6	40056500	40384500	328	6p21.2	328	S4(1.8)	0	0	0		0
chr20	15813500	16104500	291	20p12.1	291	S4(1.8)	0.004	0	0	MACROD2	0
chr8	60882500	61159500	277	8q12.1	277	S4(1.8)	0	0	0		0
chr6	153884500	154157500	273	6q25.2	273	S4(1.8)	0	0	0		0
chr10	38537500	38827500	290	10p11.1	253	S4(1.8)	0.004	0.114	33		0
chr3	147304500	147557500	253	3q24	253	S4(1.8)	0.002	0	0		0
chr6	87107500	87358500	251	6q14.3	251	S4(1.8)	0	0	0		0
chr12	71325500	71574500	249	12q15-21	249	S4(1.8)	0.001	0.012	3		0
chr13	26216500	26458500	242	13q12.13	242	S4(1.8)	0	0	0	ATP8A2	0
chr3	62922500	63152500	230	3p14.2	230	S4(1.8)	0.001	0.035	8		0
chr10	117193500	117420500	227	10q25.3	227	S4(1.8)	0.001	0.009	20	ATRNL1	0
chr2	168500	387500	219	2p25.3	219	S4(1.8)	0.149	0.11	23		0
chr8	53927500	54131500	204	8q11.23	204	S4(1.8)	0	0	0		0
chr4	158488500	158690500	202	4q32.1	202	S4(1.8)	0.001	0	0		0
chr1	194824500	195024500	200	1q31.3	200	S4(1.8)	0.001	0	0		0
chrX	108111500	108294500	183	Xq22.3	183	S4(1.8)	0.001	0.011	8		0
chr18	44971500	45116500	145	18q21.1	145	S4(1.8)	0.005	0	0		0
chr2	24500	168500	144	2p25.3	144	S4(1.8)	0	0	0		0
chr8	31364500	31504500	140	8p12	140	S4(1.8)	0	0	0	NRG1	0
chr5	155950500	156084500	134	5q33.3	134	S4(1.8)	1.095	1	978	SGCD	0
chr4	18459500	18586500	127	4p15.31	127	S4(1.8)	0	0	0		0
chr3	54248500	54371500	123	3p21.1	123	S4(1.8)	0.001	0	0	CACNA2D3	0
chr12	34433500	34556500	123	12p11.1	123	S4(1.8)	0	0	0		0
chr3	108827500	108940500	113	3q13.13	113	S4(1.8)	0	0	0		0
chr1	76734500	76842500	108	1p31.1	108	S4(1.8)	0	0	0	ST6GALNAC3	0
chr6	29249500	29350500	101	6p22.1	101	S4(1.8)	0.002	0.05	5		0
chr21	15203500	15300500	97	21q11.2	97	S4(1.8)	0	0	0		0
chrX	110559500	110650500	91	Xq23	91	S4(1.8)	0	0	0		0
chr15	94277500	94366500	89	15q26.1-2	89	S4(1.8)	0	0	0		0
chr9	68445500	68973500	528	9q13-21	83	S4(1.8)	0.001	0	0		0
chr13	63596500	63669500	73	13q21.31	73	S4(1.8)	0.002	0	0		0
chr1	181919500	181989500	70	1q25.3	70	S4(1.8)	0	0	0		0
chr8	47007500	47073500	66	8q11.1	66	S4(1.8)	0	0	0		0
chr7	82816500	82882500	66	7q21.11	66	S4(1.8)	0	0	0		0
chrX	110932500	110996500	64	Xq23	64	S4(1.8)	0.747	1	105		0
chrX	131781500	131839500	58	Xq26.2	58	S4(1.8)	0	0	0		0
chrX	42274500	42327500	53	Xp11.4	53	S4(1.8)	0.001	0	0		0
chrX	108358500	108411500	53	Xq22.3	53	S4(1.8)	0	0	0		0
chr1	187237500	187289500	52	1q31.1	52	S4(1.8)	0.099	1	370		0
chr17	31933500	31980500	47	17q12	47	S4(1.8)	0	0	0	ASIC2	0
chr21	15300500	15347500	47	21q11.2	47	S4(1.8)	0	0	0		0
chr12	23428500	23470500	42	12p12.1	42	S4(1.8)	0	0	0		0
chr8	43705500	43746500	41	8p11.1	41	S4(1.8)	0	0	0		0
chrX	51868500	51908500	40	Xp11.22	40	S4(1.8)	0.003	0.125	5		0
chr21	15471500	15511500	40	21q11.2	40	S4(1.8)	0.152	1	128		0
chr1	48627500	48665500	38	1p33	38	S4(1.8)	0	0	0		0
chr3	75686500	77962500	2276	3p12.3	2276	S4(1.9)	0.03	0.511	1096	ROBO2	0.347	1	2	2		5
chr12	126106500	127831500	1725	12q24.32	1725	S4(1.9)	0.001	0.002	4		0
chrX	62934500	64640500	1706	Xq11-12	1706	S4(1.9)	0.022	0.23	373		0
chr15	97412500	98716500	1304	15q26.2-3	1304	S4(1.9)	0.005	0.011	14		0
chr20	14699500	15525500	826	20p12.1	826	S4(1.9)	0.022	0.711	1311	MACROD2	0.113	2				2
chr2	164716500	165500500	784	2q24.3	784	S4(1.9)	0.002	0.02	13	AC092684.1	0
chrX	154477500	155204500	727	Xq28	629	S4(1.9)	0.016	0.122	88		0
chrX	20727500	21269500	542	Xp22.12	542	S4(1.9)	0.001	0	0		0
chrX	51239500	51868500	629	Xp11.22	537	S4(1.9)	0.124	0.194	106		0
chr20	23875500	24376500	501	20p11.21	501	S4(1.9)	0	0	0		0
chrX	110996500	111469500	473	Xq23	473	S4(1.9)	0.035	0.068	105		0
chr1	174550500	174966500	416	1q25.1	416	S4(1.9)	0.508	1	840	RABGAP1L	0.095	1				1
chr18	37691500	38083500	392	18q12.3	392	S4(1.9)	0.001	0	0		0.038		1			1
chr4	49182500	49611500	429	4p11	284	S4(1.9)	0	0	0		0
chr8	71872500	72155500	283	8q13.3	283	S4(1.9)	0.001	0	0		0
chrX	110650500	110932500	282	Xq23	282	S4(1.9)	0.04	0.032	105		0
chr1	75071500	75351500	280	1p31.1	280	S4(1.9)	0.083	0.129	36		0
chr1	158526500	158800500	274	1q23.1	274	S4(1.9)	0.001	0	0		0
chrX	111469500	111720500	251	Xq23	251	S4(1.9)	0.001	0	0		0
chr8	89218500	89449500	231	8q21.3	231	S4(1.9)	0.013	0.472	116		0
chr3	74980500	75161500	181	3p12.3	181	S4(1.9)	0	0	0		0
chr7	113335500	113513500	178	7q31.1	178	S4(1.9)	0	0	0		0
chrX	23044500	23193500	149	Xp22.11	149	S4(1.9)	0.015	0.027	4	RP11-40F8.2	0
chr8	46859500	47007500	148	8q11.1	148	S4(1.9)	0	0	0		0
chr3	180521500	180668500	147	3q26.33	147	S4(1.9)	0.551	0.265	77		0
chr20	16104500	16249500	145	20p12.1	145	S4(1.9)	0.001	0	0		0
chr4	121587500	121716500	129	4q27	129	S4(1.9)	0	0	0		0
chr1	48918500	49044500	126	1p33	126	S4(1.9)	0.001	0	0	AGBL4	0
chr21	15347500	15471500	124	21q11.2	124	S4(1.9)	0.087	0.573	128		0
chr3	147795500	147918500	123	3q24	123	S4(1.9)	0.002	0.033	4		0
chr5	87364500	87487500	123	5q14.3	123	S4(1.9)	0.001	0	0		0
chr4	72907500	73026500	119	4q13.3	119	S4(1.9)	0	0	0		0
chr9	92713500	92832500	119	9q22.2	119	S4(1.9)	0	0	0		0
chr3	168188500	168307500	119	3q26.2	119	S4(1.9)	0	0	0	EGFEM1P	0
chr4	164330500	164434500	104	4q32.2	104	S4(1.9)	0.27	0.192	36		0
chr12	16858500	16951500	93	12p12.3	93	S4(1.9)	0.035	0.989	93		0
chr8	109973500	110064500	91	8q23.1	91	S4(1.9)	0	0	0		0
chr3	180318500	180405500	87	3q26.33	87	S4(1.9)	0.504	0.368	32		0
chr3	118211500	118290500	79	3q13.32	79	S4(1.9)	0	0	0	RP11-384F7.1	0.12		1			1
chr10	131192500	131268500	76	10q26.3	76	S4(1.9)	0.008	0.053	303		0
chr4	82637500	82711500	74	4q21.22	74	S4(1.9)	0	0	0	RASGEF1B	0
chr6	49175500	49248500	73	6p12.3	73	S4(1.9)	0	0	0		0
chr12	23522500	23594500	72	12p12.1	72	S4(1.9)	0	0	0		0
chr10	119471500	119541500	70	10q26.11	70	S4(1.9)	0.045	0.914	193		0
chr4	69491500	69558500	67	4q13.2	67	S4(1.9)	0	0	0		0
chrX	22940500	23007500	67	Xp22.11	67	S4(1.9)	0	0	0	RP11-40F8.2	0
chr12	34734500	34800500	66	12p11.1	66	S4(1.9)	0	0	0		0
chrX	42327500	42393500	66	Xp11.4	66	S4(1.9)	0.001	0	0		0
chrX	108294500	108358500	64	Xq22.3	64	S4(1.9)	0.236	0.094	8		0
chr9	92832500	92895500	63	9q22.2	63	S4(1.9)	0	0	0		0
chrX	104211500	104274500	63	Xq22.3	63	S4(1.9)	0	0	0	IL1RAPL2	0
chrX	104151500	104211500	60	Xq22.3	60	S4(1.9)	0	0	0	IL1RAPL2	0
chr12	16801500	16858500	57	12p12.3	57	S4(1.9)	0.036	1	347		0
chr12	23470500	23522500	52	12p12.1	52	S4(1.9)	0	0	0		0
chr7	119677500	119729500	52	7q31.31	52	S4(1.9)	0.005	0.173	9		0
chr4	9439500	9508500	69	4p16.1	51	S4(1.9)	0	0	0		0
chrX	131839500	131886500	47	Xq26.2	47	S4(1.9)	0	0	0		0
chrX	119752500	122632500	2880	Xq24-25	2774	S4(2)	0.188	0.136	314		0
chr3	20380500	21770500	1390	3p24.3	1390	S4(2)	0.004	0.019	27	ZNF385D	0
chr3	116089500	117242500	1153	3q13.31	1153	S4(2)	0.001	0	0	LSAMP	1	11	19	7	3	40
chr11	134149500	134962500	813	11q25	813	S4(2)	0.006	0.038	31		0
chrX	73972500	74668500	696	Xq13.3	696	S4(2)	0.03	0.191	116		0
chrX	56481500	57173500	692	Xp11.21	692	S4(2)	0.105	0.321	253		0
chr13	38797500	39470500	673	13q13.3	673	S4(2)	0.097	0.043	29		0
chrX	131139500	131781500	642	Xq26.2	642	S4(2)	0.064	0.494	265		0
chrX	49365500	49979500	614	Xp11.22-23	614	S4(2)	0.065	0.334	201		0
chr1	13157500	14328500	1171	1p36.21	610	S4(2)	0.123	0.111	130		0
chr6	77180500	77790500	610	6q14.1	610	S4(2)	0.001	0	0		0
chr12	87518500	88073500	555	12q21.32	555	S4(2)	0.001	0	0		0
chr10	19666500	20167500	501	10p12.31	501	S4(2)	0.001	0	0	C10orf112	0
chr1	236730500	237211500	481	1q43	481	S4(2)	0.208	0.277	133	RYR2	0
chr15	95076500	95542500	466	15q26.2	466	S4(2)	0.001	0.009	4		0
chr4	165964500	166369500	405	4q32.3	405	S4(2)	0.128	0.521	130		0
chr10	38135500	38537500	402	10p11.1	402	S4(2)	0.107	0.281	57		0
chr13	63210500	63596500	386	13q21.31	386	S4(2)	0.001	0.008	3		0
chr1	163817500	164192500	375	1q23.3	375	S4(2)	0.001	0.011	4		0
chr10	9256500	9624500	368	10p14	368	S4(2)	0.001	0.016	6		0
chr3	61818500	62185500	367	3p14.2	367	S4(2)	0.975	1	758	PTPRG	0
chr18	5298500	5643500	345	18p11.31	345	S4(2)	0.001	0	0		0
chr1	181607500	181919500	312	1q25.3	312	S4(2)	0.001	0	0		0
chr6	76890500	77180500	290	6q14.1	290	S4(2)	0.001	0	0		0
chr5	151658500	151926500	268	5q33.1	268	S4(2)	0.001	0	0		0
chr3	117954500	118211500	257	3q13.32	257	S4(2)	0.001	0	0	RP11-384F7.1	1		1			1
chrX	22528500	22782500	254	Xp22.11	254	S4(2)	0.001	0	0	RP11-40F8.2	0
chr7	10873500	11120500	247	7p21.3	247	S4(2)	0.248	0.437	204		0
chr2	92278500	95516500	3238	2p-q	241	S4(2)	0	0	0		0
chr5	105798500	106038500	240	5q21.3	240	S4(2)	0.001	0	0		0
chr2	91952500	92278500	326	2p11.1	236	S4(2)	0.001	0	0		0
chr8	85980500	86202500	222	8q21.2	222	S4(2)	0.03	0.599	48		0
chr10	9624500	9821500	197	10p14	197	S4(2)	0.002	0	0		0
chr4	11342500	11539500	197	4p15.33	197	S4(2)	0.002	0.015	3		0
chr8	87349500	87545500	196	8q21.3	196	S4(2)	0.846	0.974	143		0
chr14	42706500	42894500	188	14q21.1	188	S4(2)	0.001	0	0		0
chr2	210542500	210724500	182	2q34	182	S4(2)	0.052	0.33	314		0
chr1	58250500	58429500	179	1p32.2	179	S4(2)	0	0	0	DAB1	0
chrX	79978500	80150500	172	Xq21.1	172	S4(2)	0.005	0.238	41		0
chrX	22782500	22940500	158	Xp22.11	158	S4(2)	0.001	0	0	RP11-40F8.2	0
chr8	73376500	73528500	152	8q13.3	152	S4(2)	0	0	0		0
chr8	87213500	87349500	136	8q21.3	136	S4(2)	0	0	0		0
chr18	29934500	30063500	129	18q12.1	129	S4(2)	0	0	0		0
chrX	112241500	112363500	122	Xq23	122	S4(2)	0.002	0	0		0
chr18	5176500	5298500	122	18p11.31	122	S4(2)	0.087	0.107	13		0
chr8	10123500	10233500	110	8p23.1	110	S4(2)	0.273	1	380		0
chr4	149575500	149683500	108	4q31.23	108	S4(2)	0	0	0		0
chrX	6576500	6664500	88	Xp22.31	88	S4(2)	0	0	0		0
chr15	23603500	23686500	83	15q11.2	83	S4(2)	0	0	0		1			1		1
chr9	69798500	69980500	182	9q21.11	83	S4(2)	0.003	0.236	49		0
chrX	112170500	112241500	71	Xq23	71	S4(2)	0.001	0	0		0
chr1	71258500	71320500	62	1p31.1	62	S4(2)	0.007	0.129	46		0
chr12	23594500	23651500	57	12p12.1	57	S4(2)	0	0	0		0
chr4	24500	80500	56	4p16.3	56	S4(2)	0.399	0.482	49		0
chr1	148954500	149053500	99	1q21.2	51	S4(2)	0.029	0.556	77		0
chr18	30063500	30113500	50	18q12.1	50	S4(2)	0.007	0.26	13		0
chr4	18586500	18636500	50	4p15.31	50	S4(2)	0	0	0		0
chr15	47268500	47318500	50	15q21.1	50	S4(2)	0	0	0		0
chr15	47318500	47362500	44	15q21.1	44	S4(2)	0	0	0		0
chrX	6664500	6704500	40	Xp22.31	40	S4(2)	0	0	0		0
chr20	26054500	26092500	38	20p11.1	38	S4(2)	0	0	0		0
chrX	23007500	23044500	37	Xp22.11	37	S4(2)	0	0	0	RP11-40F8.2	0
chr18	37655500	37691500	36	18q12.3	36	S4(2)	0.001	0	0		0
chr20	26053500	26054500	1	20p11.1	1	S4(2)	0	0	0		0
chr17	22276500	22277500	1	17p11.1	1	S4(2)	0	0	0		0
chr22	47865500	49857500	1992	22q13.31-33	1992	S4(2.1)	0.053	0.192	349		0.389				1	1
chr8	75422500	76822500	1400	8q21.11	1400	S4(2.1)	0.001	0.009	9		0
chr8	146500	1481500	1335	8p23.3	1335	S4(2.1)	0.017	0.082	67		0
chr1	187289500	188446500	1157	1q31.1	1157	S4(2.1)	0.012	0.168	370		0
chr12	23651500	24694500	1043	12p12.1	1043	S4(2.1)	0.001	0	0		0
chr3	153384500	154408500	1024	3q25.2	1024	S4(2.1)	0.01	0.156	160	RP11-23D24.2	0
chr6	26671500	27782500	1111	6p22.1-2	979	S4(2.1)	0.03	0.119	33		0
chr2	2050500	2989500	939	2p25.3	939	S4(2.1)	0	0.006	6	MYT1L	0
chr16	48875500	49779500	904	16q12.1	904	S4(2.1)	0	0	0		0
chr1	175579500	176448500	869	1q25.1-2	869	S4(2.1)	0.035	0.285	388		0
chr6	167858500	168796500	938	6q27	868	S4(2.1)	0.071	0.156	146		0
chr14	33450500	34314500	864	14q13.1	864	S4(2.1)	0.018	0.647	490	NPAS3	0
chr19	20863500	21704500	841	19p12	841	S4(2.1)	0.257	0.549	175		0
chr6	25414500	26240500	826	6p22.2	826	S4(2.1)	0.247	0.488	347		0.002	1				1
chr14	78531500	79314500	783	14q24-31	783	S4(2.1)	0	0.008	6	NRXN3	0
chr13	112130500	113026500	896	13q34	775	S4(2.1)	0	0.003	3		0
chr7	113513500	114252500	739	7q31.1	739	S4(2.1)	0.031	0.723	624	FOXP2	0
chr10	119541500	120268500	727	10q26.11	727	S4(2.1)	0.009	0.187	136		0
chr7	87138500	87863500	725	7q21.12	725	S4(2.1)	0.038	0.052	38		0
chr13	96728500	97451500	723	13q32.1	723	S4(2.1)	0.001	0	0	HS6ST3	0
chr8	58125500	58841500	716	8q12.1	716	S4(2.1)	0.001	0	0		0
chr2	545500	1252500	707	2p25.3	707	S4(2.1)	0.005	0.072	41		0
chr13	105771500	106446500	675	13q33.2	675	S4(2.1)	0	0.009	6		0
chr8	132967500	133639500	672	8q24.22	672	S4(2.1)	0.154	0.137	118		0
chr11	59749500	60419500	670	11q12.1-2	670	S4(2.1)	0.001	0	0		0
chr2	41167500	41801500	634	2p21-22	634	S4(2.1)	0.001	0	0		0
chr7	94652500	95279500	627	7q21.3	627	S4(2.1)	0.001	0	0		0
chr8	132164500	132765500	601	8q24.22	601	S4(2.1)	0.001	0.01	6		0
chr5	120367500	120968500	601	5q23.1	601	S4(2.1)	0.001	0	0		0
chr9	106651500	107234500	583	9q31.1	583	S4(2.1)	0.055	0.16	93		0
chrX	65240500	65803500	563	Xq12	563	S4(2.1)	0.022	0.234	132		0
chr4	132637500	133243500	606	4q28.3	562	S4(2.1)	0.001	0	0		0
chr21	15511500	16063500	552	21q11.2	552	S4(2.1)	0.007	0.065	128		0
chr3	93535500	94082500	547	3q11.1-2	547	S4(2.1)	0.162	0.298	83		0
chr6	167206500	167751500	545	6q27	545	S4(2.1)	0.049	0.165	90		0
chrX	75180500	75716500	536	Xq13.3	536	S4(2.1)	0.031	0.252	87		0
chr11	79365500	79882500	517	11q14.1	517	S4(2.1)	0.001	0.023	12		0
chr15	93765500	94277500	512	15q26.1	512	S4(2.1)	0.001	0	0		0
chr1	166762500	167270500	508	1q24.1-2	508	S4(2.1)	0.147	0.219	215		0
chr5	89633500	90119500	486	5q14.3	486	S4(2.1)	0.009	0.132	59	GPR98	0
chr1	177078500	177562500	484	1q25.2	484	S4(2.1)	0.001	0	0		0
chr10	1492500	1952500	460	10p15.3	460	S4(2.1)	0	0	0	ADARB2	0
chr6	19259500	19718500	459	6p22.3	459	S4(2.1)	0.001	0.015	7		0
chr2	210724500	211172500	448	2q34	448	S4(2.1)	0.161	0.199	57		0
chr19	20112500	20627500	515	19p12	441	S4(2.1)	0.071	0.188	40		0
chrX	132776500	133197500	421	Xq26.2	421	S4(2.1)	0.001	0.014	6		0
chr2	139171500	139585500	414	2q22.1	414	S4(2.1)	0.204	0.29	104		0
chr7	117428500	117839500	411	7q31.31	411	S4(2.1)	0.042	0.039	21		0
chr1	4012500	4421500	409	1p36.32	409	S4(2.1)	0	0	0		0
chr1	195024500	195428500	404	1q31.3	404	S4(2.1)	0.001	0	0		0
chr1	76842500	77241500	399	1p31.1	399	S4(2.1)	0.002	0.008	3	ST6GALNAC3	0
chr9	93019500	93408500	389	9q22.2	389	S4(2.1)	0.001	0.01	4		0
chr7	112953500	113335500	382	7q31.1	382	S4(2.1)	0	0	0		0
chr3	108453500	108827500	374	3q13.13	374	S4(2.1)	0.001	0	0		0
chr4	149203500	149575500	372	4q31.23	372	S4(2.1)	0	0	0		0
chr10	112923500	113291500	368	10q25.2	368	S4(2.1)	0.108	0.715	303		0
chr12	86923500	87279500	356	12q21.32	356	S4(2.1)	0.001	0	0	MGAT4C	0
chr11	31252500	31608500	356	11p13	356	S4(2.1)	0.137	0.447	285	DCDC1	0
chr9	78357500	78707500	350	9q21.13	350	S4(2.1)	0.004	0.023	8		0
chr10	10271500	10612500	341	10p14	341	S4(2.1)	0	0	0		0
chr1	48169500	48508500	339	1p33	339	S4(2.1)	0	0	0		0
chr20	38343500	38680500	337	20q12	337	S4(2.1)	0	0	0		0
chr1	238626500	238957500	331	1q43	331	S4(2.1)	0.002	0	0		0
chr3	53917500	54248500	331	3p21.1	331	S4(2.1)	0.001	0.012	4	CACNA2D3	0
chr9	109158500	109489500	331	9q31.2	331	S4(2.1)	0.001	0.009	3		0
chr1	5495500	5824500	329	1p36.31	329	S4(2.1)	0	0	0		0.076	1				1
chr6	97314500	97637500	323	6q16.1	323	S4(2.1)	0.001	0	0		0
chr14	97281500	97597500	316	14q32.2	316	S4(2.1)	0.178	0.525	184		0
chr4	18144500	18459500	315	4p15.31	315	S4(2.1)	0	0	0		0
chr6	86794500	87107500	313	6q14.3	313	S4(2.1)	0	0	0		0
chr8	43255500	43566500	311	8p11.1	311	S4(2.1)	0	0	0		0
chr16	25598500	25904500	306	16p12.1	306	S4(2.1)	0	0	0		0
chr2	213154500	213458500	304	2q34	304	S4(2.1)	0	0	0	ERBB4	0
chr7	12231500	12533500	302	7p21.3	302	S4(2.1)	0.069	0.152	42		0
chr16	26500500	26801500	301	16p12.1	301	S4(2.1)	0.001	0	0		0
chr14	106389500	106699500	310	14q32.33	297	S4(2.1)	0	0	0		0
chr7	69989500	70284500	295	7q11.22	295	S4(2.1)	1.179	0.993	1220	AUTS2	1	2	3	7		12
chr12	103536500	103828500	292	12q23.2-3	292	S4(2.1)	0.001	0	0		0
chr2	148381500	148672500	291	2q22.3	291	S4(2.1)	0.202	0.244	100		0
chr6	153595500	153884500	289	6q25.2	289	S4(2.1)	0	0	0		0
chr7	14158500	14446500	288	7p21.2	288	S4(2.1)	0.001	0.014	4	DGKB	0
chr4	176507500	176794500	287	4q34.2	287	S4(2.1)	0.001	0	0		0
chr4	18636500	18915500	279	4p15.31	279	S4(2.1)	0	0	0		0
chr10	133390500	133693500	303	10q26.3	276	S4(2.1)	0.017	0.056	124		0
chr10	125378500	125652500	274	10q26.13	274	S4(2.1)	0	0	0		0
chr4	107710500	107984500	274	4q25	274	S4(2.1)	0.008	0.212	287		0
chr4	137683500	137951500	268	4q28.3	268	S4(2.1)	0.001	0	0		0
chr5	105300500	105565500	265	5q21.3	265	S4(2.1)	0.001	0	0		0
chr9	22653500	22911500	258	9p21.3	258	S4(2.1)	0.011	0.012	3		1			1		1
chr15	97157500	97412500	255	15q26.2	255	S4(2.1)	0.001	0.035	9		0
chr8	72155500	72405500	250	8q13.3	250	S4(2.1)	0	0	0		0
chr7	123812500	124062500	250	7q31.33	250	S4(2.1)	0.001	0	0		0
chr14	99330500	99580500	250	14q32.2	250	S4(2.1)	0	0	0		0
chr6	29004500	29249500	245	6p22.1	245	S4(2.1)	0.001	0	0		0
chr3	167439500	167684500	245	3q26.1-2	245	S4(2.1)	0.006	0.106	26		0
chr17	11530500	11768500	238	17p12	238	S4(2.1)	0	0	0		0
chr3	147557500	147795500	238	3q24	238	S4(2.1)	0.002	0	0		0
chr20	40541500	40779500	238	20q12	238	S4(2.1)	0	0	0	PTPRT	0
chr20	41605500	41841500	236	20q12-13	236	S4(2.1)	0	0	0	PTPRT	0
chr21	31237500	31465500	228	21q21.3	228	S4(2.1)	0	0	0		0
chr4	27994500	28216500	222	4p15.1	222	S4(2.1)	0.002	0	0		0
chrX	116944500	117164500	220	Xq24	220	S4(2.1)	0	0	0		0
chr7	54261500	54469500	208	7p11.2	208	S4(2.1)	0.001	0	0		0
chr2	115065500	115266500	201	2q14.1	201	S4(2.1)	0	0	0	DPP10	0
chr3	25937500	26135500	198	3p24.2	198	S4(2.1)	0	0	0		0
chr4	105737500	105932500	195	4q24	195	S4(2.1)	0	0	0		0
chr4	73100500	73290500	190	4q13.3	190	S4(2.1)	0.004	0.142	27		0
chr4	61206500	61395500	189	4q13.1	189	S4(2.1)	0.002	0	0		0
chr18	7838500	8027500	189	18p11.23	189	S4(2.1)	0.771	1	845	PTPRM	0
chr3	140300500	140488500	188	3q23	188	S4(2.1)	0	0	0		0
chrX	83584500	83768500	184	Xq21.1	184	S4(2.1)	0.001	0	0		0
chrX	150295500	150472500	177	Xq28	177	S4(2.1)	0	0	0		0
chr4	42205500	42379500	174	4p13	174	S4(2.1)	0	0	0		0
chr7	48486500	48658500	172	7p12.3	172	S4(2.1)	0.001	0	0		0
chr6	49248500	49407500	159	6p12.3	159	S4(2.1)	0.001	0	0		0
chr14	42458500	42617500	159	14q21.1	159	S4(2.1)	0	0	0		0
chrX	21269500	21424500	155	Xp22.12	155	S4(2.1)	0.004	0	0		0
chr12	62337500	62484500	147	12q14.1	147	S4(2.1)	0	0	0	FAM19A2	0
chr7	108281500	108426500	145	7q31.1	145	S4(2.1)	0.001	0	0		0
chr4	160753500	160889500	136	4q32.1	136	S4(2.1)	0	0	0		0
chr18	37528500	37655500	127	18q12.3	127	S4(2.1)	0.005	0.299	38		0
chr1	190172500	190287500	115	1q31.1	115	S4(2.1)	0.002	0	0		0
chr2	139065500	139171500	106	2q22.1	106	S4(2.1)	0.002	0	0		0
chr5	88744500	88832500	88	5q14.3	88	S4(2.1)	0.001	0	0	MEF2C-AS1	0
chrX	85309500	85388500	79	Xq21.2	79	S4(2.1)	0	0	0		0
chr4	73026500	73100500	74	4q13.3	74	S4(2.1)	0	0	0		0
chr4	144905500	144978500	73	4q31.21	73	S4(2.1)	0.005	0.329	24		0
chr16	46411500	46484500	73	16q11.2	73	S4(2.1)	0.002	0.068	5		0
chr10	9821500	9891500	70	10p14	70	S4(2.1)	0	0	0		0
chr18	37210500	37279500	69	18q12.3	69	S4(2.1)	0	0	0	LINC00669	0
chr8	43746500	43807500	61	8p11.1	61	S4(2.1)	0	0	0		0
chr17	25258500	25319500	61	17q11.1	61	S4(2.1)	0.003	0	0		0
chrX	6704500	6764500	60	Xp22.31	60	S4(2.1)	0	0	0		0
chr6	318500	373500	55	6p25.3	55	S4(2.1)	0.092	0.927	78		0
chr11	4784500	4831500	47	11p15.4	47	S4(2.1)	0	0	0		0
chr1	216330500	218204500	1874	1q41	1874	S4(2.2)	0.004	0.132	247	ESRRG,USH2A	0
chr2	14388500	15959500	1571	2p24.3	1571	S4(2.2)	0.058	0.053	55	LINC00276	0
chr13	63669500	65167500	1498	13q21.31	1467	S4(2.2)	0.002	0.022	30		0
chr4	188603500	189850500	1247	4q35.2	1247	S4(2.2)	0.014	0.171	206		0
chr2	222025500	223143500	1118	2q36.1	1118	S4(2.2)	0.002	0.009	6		0
chr19	36983500	38040500	1057	19q13.12	1057	S4(2.2)	0.193	0.764	131		0.243	1				1
chr22	34197500	35216500	1019	22q12.3	1019	S4(2.2)	0	0	0	LARGE	0
chr1	193815500	194824500	1009	1q31.3	1009	S4(2.2)	0.001	0	0		0
chr12	13883500	14883500	1000	12p12-13	1000	S4(2.2)	0.265	0.168	165		0
chr14	83561500	84521500	960	14q31.1-2	960	S4(2.2)	0.001	0.005	5		0
chr9	85206500	86150500	944	9q21.32	944	S4(2.2)	0.002	0.063	59		0
chr15	92033500	92970500	937	15q26.1	937	S4(2.2)	0.084	0.349	327		0
chr7	34521500	35497500	976	7p14.2-3	917	S4(2.2)	0.001	0	0	NPSR1-AS1	0
chr9	13351500	14252500	901	9p22-23	901	S4(2.2)	0.001	0.02	9		0
chr17	68199500	69094500	895	17q24.3	895	S4(2.2)	0	0	0		0
chr16	12921500	13796500	875	16p13.12	875	S4(2.2)	0	0	0		0
chr14	86176500	87041500	865	14q31.3	865	S4(2.2)	0.001	0	0		0
chr20	50939500	51804500	865	20q13.2	865	S4(2.2)	0.082	0.274	525	TSHZ2	0
chr13	78856500	79710500	854	13q22-31	854	S4(2.2)	0.001	0.005	4	RNF219-AS1	0
chr7	155582500	156430500	848	7q36.3	848	S4(2.2)	0.001	0.008	151		0
chr14	36492500	37309500	817	14q13.2-3	817	S4(2.2)	0.001	0	0		0
chr1	79792500	80600500	808	1p31.1	808	S4(2.2)	0.001	0	0		0
chr5	7690500	8476500	786	5p15.31	786	S4(2.2)	0.037	0.099	56		0.033		1			1
chr17	71681500	72456500	775	17q25.1	775	S4(2.2)	0.03	0.018	14		0
chr5	109298500	110071500	773	5q21-22	773	S4(2.2)	0.002	0	0		0
chr17	9146500	9892500	746	17p13.1	746	S4(2.2)	0.001	0.017	13		0
chr10	122092500	122826500	734	10q26.12	734	S4(2.2)	0.214	0.467	141		0
chr19	56821500	57546500	725	19q13.43	725	S4(2.2)	0.089	0.368	48		0
chr18	76401500	77119500	718	18q23	718	S4(2.2)	0.202	0.405	327		0
chr3	108940500	109652500	712	3q13.13	712	S4(2.2)	0.12	0.736	581		0
chr8	93695500	94397500	702	8q22.1	702	S4(2.2)	0.001	0	0		0
chr20	57832500	58516500	684	20q13.32-33	684	S4(2.2)	0.008	0.203	80		0
chr18	38672500	39356500	684	18q12.3	684	S4(2.2)	0	0	0		0
chr20	20487500	21169500	682	20p11.23	682	S4(2.2)	0.026	0.092	127		0
chr7	95525500	96202500	677	7q21.3	677	S4(2.2)	0.009	0.3	327		0.139				1	1
chr6	122535500	123211500	676	6q22.31	676	S4(2.2)	0.055	0.121	47		0.033				1	1
chr14	57027500	57702500	675	14q22.3	675	S4(2.2)	0.039	0.132	85		0
chr6	160625500	161296500	671	6q25-26	671	S4(2.2)	0.001	0.004	3		0
chr6	5988500	6653500	665	6p25.1	665	S4(2.2)	0.001	0.035	118		0
chr11	115619500	116283500	664	11q23.3	664	S4(2.2)	0	0	0		0
chr13	108770500	109433500	663	13q33.3	663	S4(2.2)	0.046	0.139	59	MYO16	0
chr17	10204500	10860500	656	17p12-13	656	S4(2.2)	0.02	0.171	40		0
chr8	108849500	109500500	651	8q23.1	651	S4(2.2)	0.049	0.083	86		0
chr18	29307500	29934500	627	18q12.1	627	S4(2.2)	0.089	0.121	65		0
chr21	18071500	18698500	627	21q21.1	627	S4(2.2)	0.001	0.03	19		0
chr3	134722500	135348500	626	3q22.2	626	S4(2.2)	0.027	0.427	472	EPHB1	0
chr13	22311500	22935500	624	13q12.11	624	S4(2.2)	0	0	0		0
chr8	127062500	127685500	623	8q24.13-21	623	S4(2.2)	0	0	0		0
chr16	73504500	74126500	622	16q22-23	622	S4(2.2)	0	0	0		0
chr1	95942500	96563500	621	1p21.3	621	S4(2.2)	0.001	0	0		0
chr1	213507500	214114500	607	1q32.3	607	S4(2.2)	0.001	0.003	286		0
chr13	78084500	78678500	594	13q22.3	594	S4(2.2)	0	0	0	RNF219-AS1	0
chr7	3933500	4514500	581	7p22.1-2	581	S4(2.2)	0	0	0	SDK1	0
chrX	138633500	139205500	572	Xq27.1	572	S4(2.2)	0.001	0	0		0
chr15	61573500	62133500	560	15q22.2	560	S4(2.2)	0	0	0		0
chrX	54806500	55358500	552	Xp11.21	552	S4(2.2)	0.028	0.069	15		0
chrX	72210500	72768500	558	Xq13.2	546	S4(2.2)	0.001	0.018	10		0
chr7	64094500	64729500	635	7q11.21	545	S4(2.2)	0.161	0.45	69		0
chr21	22670500	23209500	539	21q21.1	539	S4(2.2)	0.005	0.061	327	NCAM2	0
chr3	75161500	75686500	525	3p12.3	525	S4(2.2)	0.001	0	0		0
chr18	13301500	13824500	523	18p11.21	523	S4(2.2)	0.073	0.076	40		0
chrX	37024500	37590500	566	Xp21.1	514	S4(2.2)	0.08	0.246	139	TM4SF2	0
chr7	110502500	111015500	513	7q31.1	513	S4(2.2)	0.009	0.068	35	IMMP2L	0.195	3				3
chr2	119409500	119919500	510	2q14.2	510	S4(2.2)	0.002	0.043	22		0
chr10	7119500	7628500	509	10p14	509	S4(2.2)	0	0	0		0
chr4	84930500	85435500	505	4q21.23	505	S4(2.2)	0.001	0	0		0
chr7	121343500	121839500	496	7q31.32	496	S4(2.2)	0.001	0.028	14		0
chr7	29032500	29526500	494	7p14.3	494	S4(2.2)	0.004	0	0		0
chr11	84489500	84982500	493	11q14.1	493	S4(2.2)	0.001	0	0	DLG2	0
chr5	145977500	146468500	491	5q32	491	S4(2.2)	0.001	0.02	10		0
chr10	2355500	2836500	481	10p15.3	481	S4(2.2)	0	0	0		0
chr14	81534500	82014500	480	14q31.1	480	S4(2.2)	0.001	0.031	11		0
chr6	58323500	58779500	456	6p11.1-2	456	S4(2.2)	0.001	0	0		0
chr10	128800500	129255500	455	10q26.2	455	S4(2.2)	1.041	1	679	DOCK1	0
chr13	83146500	83597500	451	13q31.1	451	S4(2.2)	0.001	0	0		0.014		1			1
chrX	111720500	112170500	450	Xq23	450	S4(2.2)	0.003	0.049	18		0
chr2	164268500	164716500	448	2q24.3	448	S4(2.2)	0.001	0	0	AC092684.1	0
chr3	162220500	162683500	463	3q26.1	448	S4(2.2)	0.001	0	0		0
chr4	28428500	28874500	446	4p15.1	446	S4(2.2)	0.096	1	537		0
chr10	43040500	43481500	441	10q11.21	441	S4(2.2)	0.112	0.122	54		0
chr1	14649500	15089500	440	1p36.21	440	S4(2.2)	0.001	0	0	KAZN	0
chr4	121149500	121587500	438	4q27	438	S4(2.2)	0.008	0.189	245		0
chr8	14821500	15257500	436	8p22	436	S4(2.2)	0.001	0	0	SGCZ	0
chr5	17640500	18076500	436	5p15.1	436	S4(2.2)	0.001	0.009	4		0
chr3	192908500	193344500	436	3q29	436	S4(2.2)	0.127	0.101	144		0
chr2	141841500	142275500	434	2q22.1-2	434	S4(2.2)	0.001	0.037	7	LRP1B	0
chr15	25289500	25713500	424	15q11-12	424	S4(2.2)	0.156	0.33	198		0
chrX	41854500	42274500	420	Xp11.4	420	S4(2.2)	0.001	0	0		0
chr4	9508500	9921500	413	4p16.1	413	S4(2.2)	0.001	0.027	11		0
chr5	147334500	147745500	411	5q32	411	S4(2.2)	0.001	0	0		0
chr2	106652500	107146500	494	2q12.2	409	S4(2.2)	0.001	0.008	4		0
chr4	144978500	145387500	409	4q31.21	409	S4(2.2)	0.001	0	0		0
chr13	19635500	20043500	408	13q12.11	408	S4(2.2)	0	0.01	4		0
chr7	3358500	3765500	407	7p22.2	407	S4(2.2)	0	0	0	SDK1	0
chr2	236535500	236931500	396	2q37.2	396	S4(2.2)	0.534	1	651	AGAP1	0
chr4	8833500	9439500	606	4p16.1	394	S4(2.2)	0	0	0		0
chr6	24173500	24553500	380	6p22.3	380	S4(2.2)	0.042	0.213	38		0
chr3	147918500	148296500	378	3q24	378	S4(2.2)	0	0	0		0
chr9	122478500	122854500	376	9q33.1-2	376	S4(2.2)	0	0	0		0
chr18	38083500	38452500	369	18q12.3	369	S4(2.2)	0.001	0	0		0
chr10	123088500	123457500	369	10q26.12-13	369	S4(2.2)	0	0	0		0
chr2	186655500	187019500	364	2q32.1	364	S4(2.2)	0.001	0	0		0
chr20	11953500	12311500	358	20p12.1-2	358	S4(2.2)	0.005	0	0		0
chr3	21770500	22120500	350	3p24.3	350	S4(2.2)	0	0	0	ZNF385D	0
chr5	129790500	130139500	349	5q23.3	349	S4(2.2)	0.001	0	0		0
chr10	125029500	125378500	349	10q26.13	349	S4(2.2)	0	0	0		0
chr6	38945500	39290500	345	6p21.2	345	S4(2.2)	0	0	0		0
chr18	27075500	27418500	343	18q12.1	343	S4(2.2)	0	0	0		0
chr13	23270500	23613500	343	13q12.11-12	343	S4(2.2)	0	0	0		0
chr9	92185500	92713500	528	9q22.2	343	S4(2.2)	0	0	0		0
chr7	71577500	71920500	343	7q11.22	343	S4(2.2)	0	0	0	CALN1	0
chrX	110217500	110559500	342	Xq23	342	S4(2.2)	0.001	0.012	4		0
chr13	85769500	86105500	336	13q31.1	336	S4(2.2)	0.001	0	0		0
chr7	15500500	15835500	335	7p21.2	335	S4(2.2)	0	0	0		0
chr11	22772500	23101500	329	11p14.3	329	S4(2.2)	0.005	0	0		0
chr19	31033500	31362500	329	19q12	329	S4(2.2)	0.089	0.574	504		0
chr12	75100500	75426500	326	12q21.1	326	S4(2.2)	0.001	0	0		0
chr7	36767500	37091500	324	7p14.2	324	S4(2.2)	0	0	0	ELMO1	0
chr5	156084500	156405500	321	5q33.3	321	S4(2.2)	0.334	0.352	978	SGCD	0.997			1		1
chr15	46243500	46560500	317	15q21.1	317	S4(2.2)	0.001	0.019	6		0
chr4	144589500	144905500	316	4q31.21	316	S4(2.2)	0.036	0.706	191		0
chr1	191766500	192082500	316	1q31.2	316	S4(2.2)	0.002	0	0		0
chr5	30456500	30771500	315	5p13.3	315	S4(2.2)	0.001	0	0		0
chr11	29729500	30043500	314	11p14.1	314	S4(2.2)	0	0	0		0
chr4	13110500	13423500	313	4p15.33	313	S4(2.2)	0.001	0	0		0
chr8	73528500	73840500	312	8q13.3	312	S4(2.2)	0	0	0		0
chr16	5373500	5679500	306	16p13.3	306	S4(2.2)	0	0	0	RP11-420N3.2	0
chr1	69195500	69500500	305	1p31.2	305	S4(2.2)	0.001	0.01	3		0
chr18	75067500	75370500	303	18q23	303	S4(2.2)	0	0	0		0
chr11	83303500	83603500	300	11q14.1	300	S4(2.2)	0.001	0	0	DLG2	0
chr1	108471500	108770500	299	1p13.3	299	S4(2.2)	0.002	0.027	8		0
chr18	70463500	70761500	298	18q22.3	298	S4(2.2)	0	0	0		0
chr12	16503500	16801500	298	12p12.3	298	S4(2.2)	0.406	1	347		0
chr3	118290500	118584500	294	3q13.32	294	S4(2.2)	0	0	0		0
chr9	87045500	87338500	293	9q21.33	293	S4(2.2)	0	0	0		0
chr8	136366500	136658500	292	8q24.22-23	292	S4(2.2)	0.395	0.647	208		0
chr2	129489500	129780500	291	2q14.3	291	S4(2.2)	0	0	0		0
chr8	50621500	50907500	286	8q11.21	286	S4(2.2)	0.001	0	0	SNTG1	0
chr8	21193500	21478500	285	8p21.3	285	S4(2.2)	0	0	0		0
chr6	47460500	47745500	285	6p12.3	285	S4(2.2)	0.603	0.502	158		0
chr10	85570500	85854500	284	10q23.1	284	S4(2.2)	0	0	0		0
chr6	48891500	49175500	284	6p12.3	284	S4(2.2)	0.001	0	0		0
chr1	82287500	82565500	278	1p31.1	278	S4(2.2)	1.461	0.719	253	LPHN2	0
chr10	8254500	8530500	276	10p14	276	S4(2.2)	0	0	0		0
chr4	154832500	155106500	274	4q31.3	274	S4(2.2)	0.03	0.657	305		0
chr8	31092500	31364500	272	8p12	272	S4(2.2)	0	0	0		0
chr2	58728500	58998500	270	2p16.1	270	S4(2.2)	0	0	0	AC007092.1	0
chr3	20110500	20380500	270	3p24.3	270	S4(2.2)	0.087	0.356	125		0
chr20	53052500	53319500	267	20q13.2	267	S4(2.2)	0.405	0.813	217		0
chr5	166655500	166920500	265	5q34	265	S4(2.2)	0	0	0	TENM2	0
chr13	86161500	86422500	261	13q31.1	261	S4(2.2)	0	0	0		0
chr6	121281500	121540500	259	6q22.31	259	S4(2.2)	0.002	0	0		0
chr8	31504500	31761500	257	8p12	257	S4(2.2)	0	0	0	NRG1	0
chr1	76478500	76734500	256	1p31.1	256	S4(2.2)	0.001	0	0	ST6GALNAC3	0
chr1	166038500	166293500	255	1q24.1	255	S4(2.2)	0	0	0		0
chr3	103950500	104205500	255	3q13.11	255	S4(2.2)	0.002	0	0		0
chr20	38848500	39102500	254	20q12	254	S4(2.2)	0	0	0		0
chr7	50319500	50585500	266	7p12.1-2	254	S4(2.2)	0	0	0		0
chr6	91278500	91532500	254	6q15	254	S4(2.2)	0.001	0.016	4		0
chr12	131019500	131270500	251	12q24.33	251	S4(2.2)	0	0	0		0
chr6	154157500	154407500	250	6q25.2	250	S4(2.2)	0	0	0		0
chr8	52588500	52837500	249	8q11.22-23	249	S4(2.2)	0.021	0.129	64		0
chr7	82569500	82816500	247	7q21.11	247	S4(2.2)	0.001	0	0		0
chr17	52930500	53177500	247	17q22	247	S4(2.2)	0.113	0.538	202		0
chr8	47687500	47933500	246	8q11.1	246	S4(2.2)	0	0	0		0
chr3	167943500	168188500	245	3q26.2	245	S4(2.2)	0.002	0	0	EGFEM1P	0
chr5	13112500	13357500	245	5p15.2	245	S4(2.2)	0	0	0		0
chr13	67779500	68023500	244	13q21.32	244	S4(2.2)	0.002	0.033	8	PCDH9	0
chr7	152524500	152766500	242	7q36.1-2	242	S4(2.2)	0.067	0.401	165		0
chr2	22134500	22375500	241	2p24.1	241	S4(2.2)	0	0	0	AC067959.1,AC068490.2	0
chr4	10808500	11048500	240	4p16.1	240	S4(2.2)	0	0	0		0
chr20	6622500	6862500	240	20p12.3	240	S4(2.2)	0.016	0.075	18		0
chr10	87679500	87918500	239	10q23.1-2	239	S4(2.2)	0	0	0	GRID1	0
chr12	103147500	103384500	237	12q23.2	237	S4(2.2)	0.006	0.266	280		0
chr2	108366500	108665500	299	2q12.3	236	S4(2.2)	0.001	0.013	4		0
chr6	87358500	87594500	236	6q14.3	236	S4(2.2)	0	0	0		0
chr2	17511500	17747500	236	2p24.2	236	S4(2.2)	0.001	0	0		0
chr2	35917500	36152500	235	2p22.3	235	S4(2.2)	0.001	0	0		0
chr3	26769500	27004500	235	3p24.1	235	S4(2.2)	0	0	0		0
chr7	154545500	154779500	234	7q36.2	234	S4(2.2)	0.016	0.15	24	DPP6	0
chr2	141440500	141674500	234	2q22.1	234	S4(2.2)	0.001	0	0	LRP1B	0
chr4	11679500	11913500	234	4p15.33	234	S4(2.2)	0	0	0		0
chr3	192195500	192428500	233	3q28-29	233	S4(2.2)	0.001	0	0	FGF12	0
chr8	50093500	50326500	233	8q11.21	233	S4(2.2)	0	0	0		0
chr2	103203500	103435500	232	2q12.1	232	S4(2.2)	0.009	0.181	59		0
chr11	37428500	37658500	230	11p12	230	S4(2.2)	0.001	0	0		0
chr5	86932500	87160500	228	5q14.3	228	S4(2.2)	0.001	0.018	4		0
chr4	82711500	82938500	227	4q21.22	227	S4(2.2)	0	0	0	RASGEF1B	0
chr7	66997500	67220500	223	7q11.21-22	223	S4(2.2)	0	0	0		0
chr6	169052500	169272500	220	6q27	220	S4(2.2)	0	0	0		0
chr4	23602500	23821500	219	4p15.2	219	S4(2.2)	0	0	0		0
chr8	13845500	14062500	217	8p22	217	S4(2.2)	0.001	0.023	5	SGCZ	0
chr8	135948500	136165500	217	8q24.22	217	S4(2.2)	0	0	0		0
chr6	18737500	18953500	216	6p22.3	216	S4(2.2)	0.001	0	0		0
chr2	198828500	199042500	214	2q33.1	214	S4(2.2)	0.506	1	387		0
chr12	18212500	18425500	213	12p12.3	213	S4(2.2)	0.001	0	0		0
chr6	46386500	46599500	213	6p12.3	213	S4(2.2)	0	0	0		0
chr10	116981500	117193500	212	10q25.3	212	S4(2.2)	0	0	0	ATRNL1	0
chr11	112517500	112728500	211	11q23.2	211	S4(2.2)	0	0	0		0
chr8	63123500	63334500	211	8q12.3	211	S4(2.2)	0	0	0	NKAIN3	0
chr2	184231500	184442500	211	2q32.1	211	S4(2.2)	0.004	0	0		0
chr8	78077500	78287500	210	8q21.11	210	S4(2.2)	0.001	0	0		0
chr3	143850500	144059500	209	3q24	209	S4(2.2)	0.022	0.646	295		0
chrX	99479500	99688500	209	Xq22.1	209	S4(2.2)	0	0	0		1			1		1
chr3	168307500	168515500	208	3q26.2	208	S4(2.2)	0	0	0	EGFEM1P	0
chr2	80444500	80652500	208	2p12	208	S4(2.2)	0	0	0	CTNNA2	0
chr5	11199500	11407500	208	5p15.2	208	S4(2.2)	0	0	0	CTNND2	0
chr12	98389500	98597500	208	12q23.1	208	S4(2.2)	0	0	0		0
chr9	108599500	108805500	206	9q31.2	206	S4(2.2)	0.007	0.121	155		0
chr12	60908500	61114500	206	12q14.1	206	S4(2.2)	0	0	0		0
chr1	174966500	175172500	206	1q25.1	206	S4(2.2)	0.049	0.136	840		1	2				2
chr6	114549500	114752500	203	6q21-22	203	S4(2.2)	0.001	0	0	RP3-399L15.3	0
chr10	69011500	69210500	199	10q21.3	199	S4(2.2)	0.001	0	0	CTNNA3	0
chr12	71574500	71773500	199	12q21.1	199	S4(2.2)	0.002	0.035	7		0
chr12	125907500	126106500	199	12q24.32	199	S4(2.2)	0.007	0	0		0
chr9	38594500	38792500	198	9p13.1	198	S4(2.2)	0	0	0		0
chr20	21478500	21676500	198	20p11.22	198	S4(2.2)	0	0	0		0
chr18	58119500	58316500	197	18q21.32	197	S4(2.2)	0.013	0.467	100		0
chr7	147988500	148184500	196	7q36.1	196	S4(2.2)	0	0	0	CNTNAP2	0
chr2	193249500	193444500	195	2q32.3	195	S4(2.2)	0.001	0	0		0
chr15	86595500	86789500	194	15q25.3	194	S4(2.2)	0	0	0	AGBL1	0
chr2	34203500	34397500	194	2p22.3	194	S4(2.2)	0	0	0	AC009499.1	0
chr4	158295500	158488500	193	4q32.1	193	S4(2.2)	0.001	0	0		0
chr4	94701500	94891500	190	4q22.2	190	S4(2.2)	0.001	0	0		1			1		1
chrX	6764500	6952500	188	Xp22.31	188	S4(2.2)	0	0	0		0
chr4	118718500	118905500	187	4q26	187	S4(2.2)	0	0	0		0
chr1	50459500	50646500	187	1p33	187	S4(2.2)	0.001	0	0	AGBL4	0
chr18	1928500	2115500	187	18p11.32	187	S4(2.2)	0.001	0	0		0
chr20	54390500	54575500	185	20q13.2	185	S4(2.2)	0.001	0	0		0.848				1	1
chr2	156926500	157111500	185	2q24.1	185	S4(2.2)	0.001	0	0		0
chr4	190004500	190188500	184	4q35.2	184	S4(2.2)	0.001	0	0		0
chr11	133553500	133737500	184	11q25	184	S4(2.2)	0.001	0.033	6		0
chrX	62628500	62812500	184	Xq11.1	184	S4(2.2)	0.001	0	0		0
chr2	195819500	196003500	184	2q32.3	184	S4(2.2)	0.001	0	0		0
chr13	26035500	26216500	181	13q12.13	181	S4(2.2)	0	0	0	ATP8A2	0
chr3	19741500	19920500	179	3p24.3	179	S4(2.2)	0.001	0	0		0
chr15	53313500	53492500	179	15q21.3	179	S4(2.2)	0	0	0		0
chr3	4314500	4492500	178	3p26.1	178	S4(2.2)	0.044	0.096	17	SUMF1	0
chr8	66215500	66392500	177	8q13.1	177	S4(2.2)	0	0	0		0
chr1	239615500	239792500	177	1q43	177	S4(2.2)	0	0	0	CHRM3	0
chr21	41107500	41281500	174	21q22.2	174	S4(2.2)	0	0	0		0
chr1	81290500	81464500	174	1p31.1	174	S4(2.2)	0	0	0		0
chr20	7472500	7645500	173	20p12.3	173	S4(2.2)	0.001	0	0		0
chr3	22747500	22918500	171	3p24.3	171	S4(2.2)	0.001	0	0		0
chr4	158690500	158859500	169	4q32.1	169	S4(2.2)	0.001	0	0		0
chr3	102276500	102445500	169	3q12.3	169	S4(2.2)	0	0	0		0
chr12	81573500	81735500	162	12q21.31	162	S4(2.2)	0.119	0.765	193	PPFIA2	0
chrX	136181500	136343500	162	Xq26.3	162	S4(2.2)	0	0	0		0
chr3	87871500	88032500	161	3p11.1-2	161	S4(2.2)	0.28	1	267		0
chr18	1130500	1290500	160	18p11.32	160	S4(2.2)	0	0	0		0
chr10	21084500	21244500	160	10p12.31	160	S4(2.2)	0.001	0	0		0
chr5	152561500	152721500	160	5q33.1-2	160	S4(2.2)	0.001	0	0	AC091969.1	0
chr4	168603500	168761500	158	4q32.3	158	S4(2.2)	0.002	0.07	7		0
chr2	84364500	84522500	158	2p11.2	158	S4(2.2)	0	0	0		0
chr4	130199500	130356500	157	4q28.2	157	S4(2.2)	0	0	0		0
chr16	59800500	59955500	155	16q21	155	S4(2.2)	0.002	0	0		0
chr16	75960500	76115500	155	16q23.1	155	S4(2.2)	0	0	0		0
chr6	124844500	124999500	155	6q22.31	155	S4(2.2)	0.001	0	0	NKAIN2	0
chr18	4152500	4301500	149	18p11.31	149	S4(2.2)	0.001	0	0	DLGAP1	0
chr5	51523500	51671500	148	5q11.2	148	S4(2.2)	0.001	0.027	4		0
chr13	91035500	91183500	148	13q31.3	148	S4(2.2)	0.002	0	0		0
chrX	3857500	4002500	145	Xp22.33	145	S4(2.2)	0	0	0		0
chrX	96049500	96194500	145	Xq21.33	145	S4(2.2)	0.362	1	949	DIAPH2	0
chr3	7991500	8131500	140	3p26.1	140	S4(2.2)	0	0	0	LMCD1-AS1	0
chr14	40120500	40258500	138	14q21.1	138	S4(2.2)	0.005	0	0		0
chr4	98732500	98869500	137	4q22-23	137	S4(2.2)	0.001	0	0	STPG2	0
chr2	13357500	13493500	136	2p24.3	136	S4(2.2)	0.001	0.022	3		0
chr14	45826500	45962500	136	14q21.2	136	S4(2.2)	0.011	0.294	233		0
chr5	85810500	85946500	136	5q14.3	136	S4(2.2)	0.031	0.051	7		0
chr2	76334500	76468500	134	2p12	134	S4(2.2)	0	0	0		0
chr1	102092500	102225500	133	1p21.1-2	133	S4(2.2)	0.001	0	0		0
chr11	96727500	96851500	124	11q21	124	S4(2.2)	0.001	0	0		0
chrX	34440500	34558500	118	Xp21.1	118	S4(2.2)	0	0	0		0
chr5	19681500	19798500	117	5p14.3	117	S4(2.2)	0.001	0	0	CDH18	0
chrX	128196500	128303500	107	Xq25	107	S4(2.2)	0	0	0		0
chr11	51501500	51607500	106	11p11.11-12	106	S4(2.2)	0	0	0		0
chr5	19995500	20097500	102	5p14.3	102	S4(2.2)	0	0	0	CDH18	0
chr4	34335500	34435500	100	4p15.1	100	S4(2.2)	0.001	0	0		0
chr2	185376500	185467500	91	2q32.1	91	S4(2.2)	0.001	0	0		0
chr1	72552500	72643500	91	1p31.1	91	S4(2.2)	0	0	0	NEGR1	1	3				3
chrX	23193500	23280500	87	Xp22.11	87	S4(2.2)	0	0	0	RP11-40F8.2	0
chr20	26092500	26177500	85	20p11.1	85	S4(2.2)	0	0	0		0
chr12	84692500	84775500	83	12q21.31	83	S4(2.2)	0.001	0	0		0
chr20	15747500	15813500	66	20p12.1	66	S4(2.2)	0.01	0	0	MACROD2	0
chrX	151788500	151960500	172	Xq28	65	S4(2.2)	0	0	0		0
chr3	144059500	144121500	62	3q24	62	S4(2.2)	0.007	0	0		0
chr1	103993500	104047500	54	1p21.1	54	S4(2.2)	0.001	0	0		0
chr11	92096500	92148500	52	11q14.3	52	S4(2.2)	0.193	1	671	FAT3	0
chr3	24693500	24744500	51	3p24.2	51	S4(2.2)	0.005	0	0		0
chr4	69346500	69491500	145	4q13.2	48	S4(2.2)	0	0	0		0
chrX	62812500	62859500	47	Xq11.1	47	S4(2.2)	0.001	0	0		0
chr12	84602500	84638500	36	12q21.31	36	S4(2.2)	0.001	0	0		0
chr10	38827500	38841500	14	10p11.1	14	S4(2.2)	0.009	0	0		0
chr5	173497500	175263500	1766	5q35.2	1766	S4(2.3)	0.032	0.033	59		0
chr3	130027500	131741500	1714	3q22.1	1714	S4(2.3)	0.169	0.326	335	CPNE4	0
chr12	21972500	23428500	1456	12p12.1	1456	S4(2.3)	0.073	0.117	118		0
chr1	195733500	196999500	1266	1q31.3	1266	S4(2.3)	0.003	0.047	52		0
chr9	82549500	83654500	1105	9q21.31	1105	S4(2.3)	0.001	0	0		0
chr12	118900500	119962500	1062	12q24.23	1062	S4(2.3)	0.015	0.018	19		0
chr7	140833500	141837500	1004	7q34	1004	S4(2.3)	0.119	0.456	254		0
chr13	34975500	35970500	995	13q13.2-3	995	S4(2.3)	0.123	0.457	736	NBEA	0
chr12	44440500	45432500	992	12q12	992	S4(2.3)	0.168	0.358	565	TMEM117	0
chr20	58720500	59672500	952	20q13.33	952	S4(2.3)	0.001	0	0		0
chr18	5643500	6578500	935	18p11.31	935	S4(2.3)	0	0	0		0
chr12	8661500	9552500	891	12p13.31	891	S4(2.3)	0.07	0.15	87		0
chr3	175656500	176536500	880	3q26.31-32	880	S4(2.3)	0.001	0	0		0
chrX	17479500	18358500	879	Xp22.13	879	S4(2.3)	0.108	0.34	362		0
chr1	233255500	234131500	876	1q42.2	876	S4(2.3)	0.013	0.099	68		0
chrX	43550500	44415500	865	Xp11.3	865	S4(2.3)	0.004	0.014	8		0
chr1	242267500	243117500	850	1q43	850	S4(2.3)	0	0	0		0
chr4	186553500	187398500	845	4q35.1-2	845	S4(2.3)	0.008	0.071	27		0
chr11	114603500	115426500	823	11q23.3	823	S4(2.3)	0	0.006	5		0
chr11	106531500	107344500	813	11q22.3	813	S4(2.3)	0.001	0.005	4		0
chr16	54414500	55227500	813	16q12.2	813	S4(2.3)	0.025	0.108	113		0
chr10	129342500	130150500	808	10q26.2	808	S4(2.3)	0	0	0		0
chr4	22001500	22774500	773	4p15.2	773	S4(2.3)	0.001	0	0		0
chr14	62721500	63484500	763	14q23.2	763	S4(2.3)	0.001	0.013	10		0
chr2	132221500	132979500	758	2q21.1-2	758	S4(2.3)	0.029	0.144	79		0
chr1	34410500	35167500	757	1p34-35	757	S4(2.3)	0	0	0	CSMD2	0
chrX	68533500	69289500	756	Xq13.1	756	S4(2.3)	0.001	0	0		0
chr10	60995500	61736500	741	10q21.1-2	741	S4(2.3)	0.001	0.02	15		0
chr12	3894500	4634500	740	12p13.32	740	S4(2.3)	0.039	0.095	66		0
chr19	32093500	32775500	682	19q12-13	682	S4(2.3)	0	0.01	7		0
chr2	168172500	168844500	672	2q24.3	672	S4(2.3)	0.004	0	0		0
chr9	14460500	15128500	668	9p22.3	668	S4(2.3)	0.003	0.006	4		0
chr18	66611500	67263500	652	18q22.1-2	652	S4(2.3)	0.067	0.299	452		0
chr4	14376500	15028500	652	4p15.33	652	S4(2.3)	0.108	0.051	76		0
chr1	90951500	91602500	651	1p22.2	651	S4(2.3)	0.001	0	0		0
chrX	107462500	108111500	649	Xq22.3	649	S4(2.3)	0.051	0.405	263		0
chr5	90945500	91587500	642	5q14.3	642	S4(2.3)	0.003	0.061	309		0
chr2	52978500	53618500	640	2p16.2	640	S4(2.3)	0.001	0	0		0
chr18	47549500	48187500	638	18q21.1	638	S4(2.3)	0.019	0.049	21		0
chr7	157589500	158213500	624	7q36.3	624	S4(2.3)	0.001	0	0	PTPRN2	0
chr2	21307500	21922500	615	2p24.1	615	S4(2.3)	0	0	0	AC067959.1	0
chr18	73390500	73981500	591	18q23	591	S4(2.3)	0	0	0		0
chr8	142812500	143402500	590	8q24.3	590	S4(2.3)	0	0	0		0
chr8	140402500	140988500	586	8q24.3	586	S4(2.3)	0	0	0	TRAPPC9	1		1			1
chr10	131573500	132155500	582	10q26.3	582	S4(2.3)	0.137	0.409	157		0.162		1			1
chr1	152339500	152919500	580	1q21.3	580	S4(2.3)	0.024	0.216	189		0
chr5	143918500	144495500	577	5q31.3	577	S4(2.3)	0.005	0.057	50		0
chr11	23984500	24560500	576	11p14.3	576	S4(2.3)	0.002	0	0	LUZP2	0
chr13	102557500	103133500	576	13q33.1	576	S4(2.3)	0.001	0	0	FGF14	0
chr6	119552500	120126500	574	6q22.31	574	S4(2.3)	0.014	0.533	257		0
chr6	146347500	146920500	573	6q24.3	573	S4(2.3)	0.046	0.098	60		0
chr19	30256500	30817500	561	19q12	561	S4(2.3)	0.447	0.421	504		0.003			1		1
chr10	97628500	98187500	559	10q24.1	559	S4(2.3)	0.066	0.127	45		0
chr12	67086500	67645500	559	12q14.3	559	S4(2.3)	0	0	0		0
chr3	28150500	28709500	559	3p24.1	559	S4(2.3)	0.144	0.746	227		0
chr15	84124500	84679500	555	15q25.2	555	S4(2.3)	0.001	0	0		0
chr15	28056500	28726500	670	15q12-13	543	S4(2.3)	0	0	0		0
chr12	117707500	118250500	543	12q24.22-23	543	S4(2.3)	0	0	0	KSR2	0
chr7	25549500	26085500	536	7p15.2	536	S4(2.3)	0	0	0		0
chr14	66432500	66957500	525	14q23.3	525	S4(2.3)	0.001	0	0		0
chr6	99171500	99696500	525	6q16.1-2	525	S4(2.3)	0.001	0.006	3		0
chr5	59426500	59946500	520	5q12.1	520	S4(2.3)	0.001	0.008	4	PDE4D	0
chr17	31424500	31933500	509	17q11-12	509	S4(2.3)	0	0	0	ASIC2	0
chr1	30281500	30788500	507	1p35.2	507	S4(2.3)	0	0	0		0
chr11	123750500	124251500	501	11q24.1-2	501	S4(2.3)	0.002	0.068	34		0
chr7	131735500	132234500	499	7q32.3	499	S4(2.3)	0	0	0	PLXNA4	0
chr6	23131500	23624500	493	6p22.3	493	S4(2.3)	0.001	0	0		0
chr2	214295500	214782500	487	2q34	487	S4(2.3)	0.011	0.363	175	SPAG16	0
chrX	38872500	39357500	485	Xp11.4	485	S4(2.3)	0.002	0	0		0
chr12	84775500	85260500	485	12q21.31	485	S4(2.3)	0.001	0	0		0
chr6	89312500	89796500	484	6q15	484	S4(2.3)	0.02	0.012	65		0
chr9	88181500	88664500	483	9q21.33	483	S4(2.3)	0.243	0.429	108		0
chr20	16505500	16986500	481	20p12.1	481	S4(2.3)	0.048	0.031	15		0
chr5	115627500	116106500	479	5q23.1	479	S4(2.3)	0.101	0.58	363		0
chr4	80053500	80525500	472	4q21.21	472	S4(2.3)	0.002	0	0		1		1			1
chr6	54996500	55468500	472	6p12.1	472	S4(2.3)	0.001	0	0		0
chr16	58990500	59459500	469	16q21	469	S4(2.3)	0.002	0.006	3		0
chr16	50832500	51300500	468	16q12.1	468	S4(2.3)	0.028	0.209	78		0
chrX	77602500	78062500	460	Xq21.1	460	S4(2.3)	0.001	0.013	6		1				1	1
chr8	89449500	89907500	458	8q21.3	458	S4(2.3)	0.006	0.015	116		0.925	1				1
chr7	123141500	123589500	448	7q31.32	448	S4(2.3)	0.005	0.051	19		0
chr6	102312500	102760500	448	6q16.3	448	S4(2.3)	0.002	0.018	8	GRIK2	0
chr3	40731500	41160500	429	3p22.1	429	S4(2.3)	0	0	0		0
chr7	13251500	13678500	427	7p21.3	427	S4(2.3)	0.005	0	0	AC011288.2	0
chr17	31980500	32407500	427	17q12	427	S4(2.3)	0	0	0	ASIC2	0
chr7	82882500	83301500	419	7q21.11	419	S4(2.3)	0.001	0.026	11		0
chr4	174634500	175053500	419	4q34.1	419	S4(2.3)	0.001	0	0		0
chr15	31977500	32392500	415	15q13.3	415	S4(2.3)	0.001	0	0		0
chr10	16020500	16429500	409	10p13	409	S4(2.3)	0	0	0		0
chr2	7535500	7944500	409	2p25.1	409	S4(2.3)	0.001	0	0		0
chr1	159124500	159527500	403	1q23.2	403	S4(2.3)	0	0	0		0
chr15	88442500	88842500	400	15q25.3	400	S4(2.3)	0	0	0		0
chr11	4385500	4784500	399	11p15.4	399	S4(2.3)	0	0	0		0
chr16	53641500	54040500	399	16q12.2	399	S4(2.3)	1.126	0.759	463		0
chr5	107305500	107700500	395	5q21.3	395	S4(2.3)	0.002	0.068	27	FBXL17	0
chr5	87736500	88126500	390	5q14.3	390	S4(2.3)	0.001	0.008	3		0
chr3	63152500	63537500	385	3p14.2	385	S4(2.3)	0	0	0		0
chr1	71320500	71703500	383	1p31.1	383	S4(2.3)	0.014	0.501	217		0
chr3	161551500	161928500	377	3q26.1	377	S4(2.3)	0.001	0	0		0
chr13	93186500	93559500	373	13q31.3	373	S4(2.3)	0.001	0.013	5	GPC5	0
chr14	88327500	88699500	372	14q31.3	372	S4(2.3)	0.001	0	0		0
chr6	20698500	21058500	360	6p22.3	360	S4(2.3)	0.436	1	713	CDKAL1	0
chr14	29105500	29459500	354	14q12	354	S4(2.3)	0	0	0		0
chrX	97097500	97451500	354	Xq21.33	354	S4(2.3)	0.003	0.011	4		0
chr7	124359500	124711500	352	7q31.33	352	S4(2.3)	0.005	0.099	35		0
chr9	119619500	119970500	351	9q33.1	351	S4(2.3)	0	0	0	ASTN2	0
chr15	87819500	88169500	350	15q25.3	350	S4(2.3)	0	0	0		0
chrX	103804500	104151500	347	Xq22.3	347	S4(2.3)	0	0	0	IL1RAPL2	0
chr1	168598500	168942500	344	1q24.2	344	S4(2.3)	0.001	0	0		0
chr5	155236500	155576500	340	5q33.2	340	S4(2.3)	0.086	1	978	SGCD	0
chr6	115840500	116173500	333	6q22.1	333	S4(2.3)	0.001	0	0		0
chrX	76211500	76542500	331	Xq21.1	331	S4(2.3)	0	0	0		0
chr1	61630500	61949500	319	1p31.3	319	S4(2.3)	0.643	0.959	394	NFIA	0
chr6	29350500	29669500	319	6p22.1	319	S4(2.3)	0.001	0	0		0
chr8	53610500	53927500	317	8q11.23	317	S4(2.3)	0.02	0.101	32		0
chr13	39470500	39784500	314	13q13.3	314	S4(2.3)	0.019	0.134	42		0
chrX	83213500	83517500	304	Xq21.1	304	S4(2.3)	0.001	0	0		0
chr6	39754500	40056500	302	6p21.2	302	S4(2.3)	0.044	0.394	113		0
chr4	149683500	149983500	300	4q31.23	300	S4(2.3)	0	0	0		0
chr2	60504500	60797500	293	2p16.1	293	S4(2.3)	0.001	0	0		0
chr1	247523500	247810500	287	1q44	287	S4(2.3)	0.013	0.23	58		0
chr18	45116500	45398500	282	18q21.1	282	S4(2.3)	0.001	0.011	3		0
chr21	42378500	42659500	281	21q22.2-3	281	S4(2.3)	0.051	0.441	121		0
chr13	61021500	61299500	278	13q21.2	278	S4(2.3)	0.254	0.547	203		0
chr15	26392500	26667500	275	15q12	275	S4(2.3)	0	0	0		0
chr10	113621500	113896500	275	10q25.2	275	S4(2.3)	0	0	0		0
chr8	54131500	54405500	274	8q11.23	274	S4(2.3)	0	0	0		0
chr5	43854500	44125500	271	5p12	271	S4(2.3)	0.001	0.011	3		0
chr2	136898500	137168500	270	2q22.1	270	S4(2.3)	0	0	0		0
chr7	86556500	86825500	269	7q21.12	269	S4(2.3)	0.55	0.178	60		0
chr4	134629500	134898500	269	4q28.3	269	S4(2.3)	0.001	0	0		0
chr6	78204500	78472500	268	6q14.1	268	S4(2.3)	0.001	0	0		0
chr11	132823500	133090500	267	11q25	267	S4(2.3)	0.001	0.022	6	OPCML	0
chr10	110595500	110861500	266	10q25.1	266	S4(2.3)	0	0	0		0
chrX	51962500	52689500	727	Xp11.22	265	S4(2.3)	0	0	0		0
chr5	42426500	42690500	264	5p12-13	264	S4(2.3)	0.114	1	299		0
chr5	154545500	154807500	262	5q33.2	262	S4(2.3)	0.001	0	0		0
chr6	8247500	8507500	260	6p24.3	260	S4(2.3)	0.025	0.281	350		0.23			1		1
chr4	82377500	82637500	260	4q21.21-22	260	S4(2.3)	0	0	0	RASGEF1B	0
chr3	54371500	54629500	258	3p14-21	258	S4(2.3)	0	0	0	CACNA2D3	0
chr4	178613500	178870500	257	4q34.3	257	S4(2.3)	0	0	0		0
chr18	34920500	35176500	256	18q12.2	256	S4(2.3)	0	0	0		0
chr12	42131500	42384500	253	12q12	253	S4(2.3)	0	0	0		0
chrX	108411500	108663500	252	Xq22.3	252	S4(2.3)	0	0	0		0
chr6	40384500	40634500	250	6p21.1-2	250	S4(2.3)	0	0	0		0
chr6	46599500	46848500	249	6p12.3	249	S4(2.3)	0.005	0.137	34		0
chr5	1842500	2089500	247	5p15.33	247	S4(2.3)	0	0	0		0
chr1	70097500	70342500	245	1p31.1	245	S4(2.3)	0	0	0	LRRC7	0
chr1	186994500	187237500	243	1q31.1	243	S4(2.3)	0.08	0.802	370		0
chr2	127261500	127502500	241	2q14.3	241	S4(2.3)	0.041	0.237	57		0
chr3	191182500	191422500	240	3q28	240	S4(2.3)	0.002	0	0		0
chr7	158873500	159113500	240	7q36.3	240	S4(2.3)	0.001	0	0		0
chr8	51145500	51382500	237	8q11.21	237	S4(2.3)	0.001	0	0	SNTG1	0
chr8	75185500	75422500	237	8q21.11	237	S4(2.3)	0.013	0.093	22		0
chr4	156140500	156375500	235	4q32.1	235	S4(2.3)	0	0	0		0
chr13	83973500	84208500	235	13q31.1	235	S4(2.3)	0.002	0	0		0
chrX	95308500	95542500	234	Xq21.33	234	S4(2.3)	0.001	0	0		0
chr4	72675500	72907500	232	4q13.3	232	S4(2.3)	0.001	0	0		0
chr17	49603500	49834500	231	17q21.33	231	S4(2.3)	0	0	0	CA10	0
chr10	24233500	24464500	231	10p12.2	231	S4(2.3)	0	0	0	KIAA1217	0
chr6	63969500	64200500	231	6q12	231	S4(2.3)	0.001	0.013	3		0
chr2	118848500	119078500	230	2q14.2	230	S4(2.3)	0.038	0.204	37		0
chr13	73153500	73382500	229	13q21-22	229	S4(2.3)	0.173	0.253	274		0
chr1	158298500	158526500	228	1q23.1	228	S4(2.3)	0.001	0	0		0
chr3	5366500	5592500	226	3p26.1	226	S4(2.3)	0.004	0	0		0
chr8	61159500	61385500	226	8q12.1	226	S4(2.3)	0.001	0	0		0
chr14	87541500	87766500	225	14q31.3	225	S4(2.3)	0	0	0		0
chr8	20383500	20608500	225	8p21.3	225	S4(2.3)	0	0	0		0
chr2	48982500	49207500	225	2p16.3	225	S4(2.3)	0	0	0		0
chr16	63978500	64202500	224	16q21	224	S4(2.3)	0.001	0	0		0
chr2	143196500	143416500	220	2q22.2	220	S4(2.3)	0	0	0		0
chr18	48741500	48959500	218	18q21.2	218	S4(2.3)	0.003	0.142	50		0
chr13	59524500	59741500	217	13q21.1-2	217	S4(2.3)	0	0	0		0
chr1	58429500	58645500	216	1p32.2	216	S4(2.3)	0	0	0	DAB1	0
chr6	27859500	28075500	216	6p22.1	216	S4(2.3)	0.026	0.433	72		0
chr1	83996500	84212500	216	1p31.1	216	S4(2.3)	0.002	0	0		0
chr5	6208500	6423500	215	5p15.31-32	215	S4(2.3)	0.001	0.028	6		0
chrX	65931500	66146500	215	Xq12	215	S4(2.3)	0.001	0	0		0
chr3	61123500	61335500	212	3p14.2	212	S4(2.3)	0	0	0	FHIT	0
chr12	100130500	100342500	212	12q23.1	212	S4(2.3)	0.001	0	0	ANKS1B	0
chr10	59371500	59579500	208	10q21.1	208	S4(2.3)	0.001	0	0		0
chr12	99339500	99546500	207	12q23.1	207	S4(2.3)	0	0	0	ANKS1B	0.626		1			1
chr12	97496500	97703500	207	12q23.1	207	S4(2.3)	0	0	0		0
chr8	57920500	58125500	205	8q12.1	205	S4(2.3)	0.002	0.044	23		0
chr5	63457500	63662500	205	5q12.3	205	S4(2.3)	0.092	0.98	232		0
chr18	31998500	32202500	204	18q12.1	204	S4(2.3)	0.005	0	0		0
chr3	147101500	147304500	203	3q24	203	S4(2.3)	0.045	0.36	73		0
chr5	117938500	118139500	201	5q23.1	201	S4(2.3)	0.001	0	0		0
chr16	79852500	80052500	200	16q23.2	200	S4(2.3)	0	0	0		0
chr11	20560500	20759500	199	11p15.1	199	S4(2.3)	0	0	0	NELL1	0
chr10	106448500	106647500	199	10q25.1	199	S4(2.3)	0	0	0	SORCS3	0
chr3	34217500	34415500	198	3p22.3	198	S4(2.3)	0.001	0	0		0
chr5	83456500	83654500	198	5q14.3	198	S4(2.3)	0.001	0	0		0
chr8	55345500	55543500	198	8q11-12	198	S4(2.3)	0	0	0		0
chr6	161861500	162059500	198	6q26	198	S4(2.3)	0.002	0.091	20	PARK2	0
chr11	25885500	26081500	196	11p14.3	196	S4(2.3)	0	0	0		0
chr3	115893500	116089500	196	3q13.31	196	S4(2.3)	0.006	0	0	LSAMP	1		1	1	1	3
chr2	23174500	23370500	196	2p24.1	196	S4(2.3)	0	0	0		0
chr7	20481500	20677500	196	7p21.1	196	S4(2.3)	0.001	0	0		0
chr12	20714500	20909500	195	12p12.2	195	S4(2.3)	0.003	0	0		0
chr2	122898500	123093500	195	2q14.3	195	S4(2.3)	0	0	0		0
chr18	24125500	24318500	193	18q11.2	193	S4(2.3)	0.001	0.016	3	AQP4-AS1	0
chr3	67891500	68084500	193	3p14.1	193	S4(2.3)	0.011	0.306	247	FAM19A1	0
chr8	60690500	60882500	192	8q12.1	192	S4(2.3)	0.002	0	0		0
chr8	116067500	116258500	191	8q23.3	191	S4(2.3)	0.001	0	0		0
chr2	89088500	89279500	191	2p11.2	191	S4(2.3)	0	0	0		0
chr2	147395500	147586500	191	2q22.3	191	S4(2.3)	0.001	0	0		0
chr13	26458500	26648500	190	13q12.13	190	S4(2.3)	0	0	0	ATP8A2	0.037			1		1
chr5	160072500	160259500	187	5q34	187	S4(2.3)	0	0	0		0
chr8	89033500	89218500	185	8q21.3	185	S4(2.3)	0.001	0	0		0
chr8	136723500	136906500	183	8q24.23	183	S4(2.3)	0	0	0		0
chr3	182207500	182390500	183	3q26.33	183	S4(2.3)	0	0	0		0
chr2	79912500	80094500	182	2p12	182	S4(2.3)	0	0	0	CTNNA2	0
chr6	8895500	9076500	181	6p24.3	181	S4(2.3)	0	0	0		0
chr4	37350500	37529500	179	4p14	179	S4(2.3)	0	0	0		0
chr13	81073500	81252500	179	13q31.1	179	S4(2.3)	0.003	0	0		0
chr5	155772500	155950500	178	5q33.3	178	S4(2.3)	1.074	1	978	SGCD	0
chr15	94898500	95076500	178	15q26.2	178	S4(2.3)	0.067	0.747	251		0
chr12	33053500	33228500	175	12p11.21	175	S4(2.3)	0	0	0		0
chr11	56596500	56771500	175	11q12.1	175	S4(2.3)	0	0	0		0
chr9	77891500	78066500	175	9q21.13	175	S4(2.3)	0.006	0.349	250		0
chr18	58795500	58970500	175	18q21.32	175	S4(2.3)	0.001	0	0		0
chr10	25633500	25807500	174	10p12.1	174	S4(2.3)	0	0	0		0
chr12	85260500	85432500	172	12q21.31	172	S4(2.3)	0.001	0	0		0
chr8	36280500	36450500	170	8p12	170	S4(2.3)	0	0	0		0
chr2	95516500	95686500	170	2q11.1	170	S4(2.3)	0.002	0.018	3		0
chr10	54674500	54842500	168	10q21.1	168	S4(2.3)	0.001	0	0		0
chr11	48517500	48684500	167	11p11.2	167	S4(2.3)	0	0	0		0
chr8	87545500	87711500	166	8q21.3	166	S4(2.3)	0.195	0.295	97		0
chr9	77230500	77395500	165	9q21.13	165	S4(2.3)	0.001	0	0		0
chr4	90697500	90861500	164	4q22.1	164	S4(2.3)	0	0	0		0
chr7	126755500	126918500	163	7q31.33	163	S4(2.3)	0.001	0	0	GRM8	0
chr7	8269500	8431500	162	7p21.3	162	S4(2.3)	0.001	0	0		0
chrX	114991500	115152500	161	Xq23	161	S4(2.3)	0.001	0	0		0
chr5	106479500	106639500	160	5q21.3	160	S4(2.3)	0.002	0	0		0
chr11	82138500	82297500	159	11q14.1	159	S4(2.3)	0	0	0	RP11-179A16.1	0
chr1	75945500	76104500	159	1p31.1	159	S4(2.3)	0.001	0	0		0
chr6	97858500	98016500	158	6q16.1	158	S4(2.3)	0.001	0	0		0
chr10	37190500	37344500	154	10p11.21	154	S4(2.3)	0.002	0.019	3		0
chr1	61218500	61371500	153	1p31-32	153	S4(2.3)	0	0	0	NFIA	0
chr2	118294500	118446500	152	2q14.1	152	S4(2.3)	0	0	0		0
chr18	64556500	64706500	150	18q22.1	150	S4(2.3)	0.001	0	0		0
chr4	61704500	61854500	150	4q13.1	150	S4(2.3)	0	0	0		0
chr18	25188500	25337500	149	18q12.1	149	S4(2.3)	0	0	0		0
chr16	18039500	18187500	148	16p12.3	148	S4(2.3)	0	0	0		0
chr15	94366500	94511500	145	15q26.2	145	S4(2.3)	0	0	0		0
chr3	88161500	88306500	145	3p11.1	145	S4(2.3)	0.582	0.469	80		0
chr7	85348500	85493500	145	7q21.11	145	S4(2.3)	0.003	0	0		0
chr18	68520500	68665500	145	18q22.2	145	S4(2.3)	0.001	0	0		0
chr3	81995500	82138500	143	3p12.2	143	S4(2.3)	0.001	0	0		0
chr2	105422500	105563500	141	2q12.1	141	S4(2.3)	0	0	0		0
chr11	36879500	37018500	139	11p12	139	S4(2.3)	0.001	0	0		0
chr4	182283500	182422500	139	4q34.3	139	S4(2.3)	0	0	0		0
chr19	29180500	29318500	138	19q12	138	S4(2.3)	0.001	0	0		0
chr9	76088500	76224500	136	9q21.13	136	S4(2.3)	0.001	0	0		0
chr2	3988500	4123500	135	2p25.3	135	S4(2.3)	0	0	0		0
chr4	71075500	71206500	131	4q13.3	131	S4(2.3)	0.001	0	0		0
chr4	107984500	108112500	128	4q25	128	S4(2.3)	0	0	0		0
chr14	45079500	45206500	127	14q21.2	127	S4(2.3)	0	0	0		0
chr11	91970500	92096500	126	11q14.3	126	S4(2.3)	0.193	1	671	FAT3	0
chr5	98551500	98674500	123	5q21.1	123	S4(2.3)	0.001	0	0		0
chr8	2082500	2201500	119	8p23.2-3	119	S4(2.3)	0.001	0	0		0
chr7	51231500	51347500	116	7p12.1	116	S4(2.3)	0	0	0		0
chr3	74865500	74980500	115	3p12.3	115	S4(2.3)	0	0	0		0
chr1	208909500	209024500	115	1q32.2	115	S4(2.3)	0.001	0	0		0
chrX	7450500	7559500	109	Xp22.31	109	S4(2.3)	0.001	0	0		0
chr10	65889500	65996500	107	10q21.3	107	S4(2.3)	0	0	0		0
chrX	123450500	123554500	104	Xq25	104	S4(2.3)	0	0	0	TENM1	0
chr22	17313500	17413500	100	22q11.1	100	S4(2.3)	0.001	0	0		0
chr3	86560500	86659500	99	3p12.1	99	S4(2.3)	0.001	0	0		0
chr1	208810500	208909500	99	1q32.2	99	S4(2.3)	0.001	0.091	9		0
chr3	117856500	117954500	98	3q13.32	98	S4(2.3)	0.001	0	0	RP11-384F7.1	1		1			1
chr14	20444500	20541500	97	14q11.2	97	S4(2.3)	0.001	0	0		0
chr20	15525500	15620500	95	20p12.1	95	S4(2.3)	0.01	0	0	MACROD2	0
chr1	60665500	60760500	95	1p32.1	95	S4(2.3)	0.001	0	0		0
chr5	103276500	103367500	91	5q21.2	91	S4(2.3)	0.028	0.681	744		0
chrX	35146500	35227500	81	Xp21.1	81	S4(2.3)	0	0	0		0
chr9	66787500	66868500	81	9q13	81	S4(2.3)	0	0	0		0
chr9	26066500	26146500	80	9p21.2	80	S4(2.3)	0.003	0	0		0
chrX	62859500	62934500	75	Xq11.1	75	S4(2.3)	0.004	0	0		0
chr1	103048500	103118500	70	1p21.1	70	S4(2.3)	0.001	0	0		0
chr12	84638500	84692500	54	12q21.31	54	S4(2.3)	0.001	0	0		0
chr5	83654500	83705500	51	5q14.3	51	S4(2.3)	0	0	0		0
chr4	21675500	21725500	50	4p15.2	50	S4(2.3)	0	0	0	KCNIP4	0
chr8	72405500	72453500	48	8q13.3	48	S4(2.3)	0	0	0		0
chr16	46364500	46411500	47	16q11.2	47	S4(2.3)	0	0	0		0
chrX	155204500	155245500	41	Xq28	41	S4(2.3)	0	0	0		0
chr12	84384500	84385500	1	12q21.31	1	S4(2.3)	0	0	0		0
chr13	65404500	67045500	1641	13q21.31-32	1641	S4(2.4)	0.001	0.004	7	PCDH9	0
chr19	51377500	52641500	1264	19q13.33-41	1264	S4(2.4)	0.058	0.15	36		0
chr6	163352500	164561500	1209	6q26-27	1209	S4(2.4)	0.504	0.156	188	PACRG	0
chr6	79423500	80616500	1193	6q14.1	1193	S4(2.4)	0.02	0.282	142		0
chr3	77962500	78962500	1000	3p12.3	1000	S4(2.4)	0.001	0	0	ROBO1	0
chr7	38068500	39043500	975	7p14.1	975	S4(2.4)	0.06	0.124	158	POU6F2	0
chr1	118908500	119791500	883	1p12	883	S4(2.4)	0.028	0.195	160		0
chr20	12767500	13616500	849	20p12.1	849	S4(2.4)	0.003	0.055	47		0
chr3	172861500	173701500	840	3q26.31	840	S4(2.4)	0.812	0.7	937	NLGN1	0
chr2	215009500	215834500	825	2q34-35	825	S4(2.4)	0.013	0.195	214	SPAG16	0
chr16	9674500	10460500	786	16p13.2	786	S4(2.4)	0	0	0		0
chrX	66640500	67416500	776	Xq12	776	S4(2.4)	0.058	0.254	197		0
chrX	101046500	102113500	1067	Xq22.1	774	S4(2.4)	0.06	0.252	168		0.591			1		1
chr12	72684500	73397500	713	12q21.1	713	S4(2.4)	0.061	0.558	416	TRHDE	0
chr11	113060500	113773500	713	11q23.2	713	S4(2.4)	0.001	0.007	5		0
chr8	61570500	62257500	687	8q12.1-3	687	S4(2.4)	0.025	0.282	194		0
chr18	44294500	44971500	677	18q21.1	677	S4(2.4)	0.064	0.526	168		0
chr5	177759500	178432500	673	5q35.3	673	S4(2.4)	0.021	0.187	45		0
chr8	10233500	10898500	665	8p23.1	665	S4(2.4)	0.022	0.191	380		0
chr10	117703500	118361500	658	10q25.3	658	S4(2.4)	0.001	0.015	10	ATRNL1	0
chr16	20045500	20695500	650	16p12.3	650	S4(2.4)	0	0	0		0
chr4	126775500	127423500	648	4q28.1	648	S4(2.4)	0.001	0.011	7		0
chr2	130626500	131630500	1004	2q21.1	642	S4(2.4)	0.017	0.073	45		0
chr18	23373500	24000500	627	18q11.2	627	S4(2.4)	0.028	0.265	166		0
chr5	61607500	62226500	619	5q12.1	619	S4(2.4)	0.468	0.611	384		0
chr6	70862500	71463500	601	6q13	601	S4(2.4)	0.198	0.458	199		0
chr21	32468500	33030500	562	21q22.11	562	S4(2.4)	0	0	0		0
chr1	169109500	169665500	556	1q24.2	556	S4(2.4)	0.1	0.198	76		0
chr1	18313500	18861500	548	1p36.13	548	S4(2.4)	0	0	0		0
chr3	67222500	67763500	541	3p14.1	541	S4(2.4)	0.014	0.111	247		0
chr8	81210500	81749500	539	8q21.13	539	S4(2.4)	0.024	0.109	54		0
chr8	92286500	92823500	537	8q21.3	537	S4(2.4)	0.001	0	0		0
chr10	23324500	23851500	527	10p12.2	527	S4(2.4)	0.03	0.135	42		0
chr19	29482500	30009500	527	19q12	527	S4(2.4)	0	0	0		0
chr6	156268500	156779500	511	6q25.3	511	S4(2.4)	0.001	0	0		0
chr1	88478500	88988500	510	1p22.2	510	S4(2.4)	0.001	0	0		0
chr4	106281500	106791500	510	4q24	510	S4(2.4)	0.091	0.318	179		0
chr19	9028500	9533500	505	19p13.2	505	S4(2.4)	0.117	0.216	76		0
chr2	179624500	180128500	504	2q31.2	504	S4(2.4)	0.003	0.01	5		0
chr3	97550500	98053500	503	3q11.2	503	S4(2.4)	0.142	0.245	191		0
chr3	59567500	60069500	502	3p14.2	502	S4(2.4)	0	0	0	FHIT	0
chr14	57838500	58336500	498	14q22-23	498	S4(2.4)	0.065	0.133	63		0
chr2	166074500	166566500	492	2q24.3	492	S4(2.4)	0.005	0.201	99		0
chr7	19565500	20049500	484	7p21.1	484	S4(2.4)	0.003	0	0		0
chr12	30175500	30652500	477	12p11.22	477	S4(2.4)	0	0	0		0
chr3	137029500	137504500	475	3q22.3	475	S4(2.4)	0	0	0		0
chr8	63872500	64343500	471	8q12.3	471	S4(2.4)	0.397	0.312	99	NKAIN3	0
chr10	119009500	119471500	462	10q25-26	462	S4(2.4)	0.149	0.418	193		0
chr4	73290500	73744500	454	4q13.3	454	S4(2.4)	0.003	0	0		0
chr1	2675500	3126500	451	1p36.32	451	S4(2.4)	0	0	0		0
chr7	26218500	26660500	442	7p15.2	442	S4(2.4)	0.069	0.032	14		0
chr9	1743500	2180500	437	9p24.3	437	S4(2.4)	0.401	0.373	214		1		1			1
chr9	26282500	26716500	434	9p21.2	434	S4(2.4)	0.001	0	0		0
chr5	169657500	170085500	428	5q35.1	428	S4(2.4)	0	0	0		0
chr4	30939500	31366500	427	4p15.1	427	S4(2.4)	0.001	0	0		0
chr20	59853500	60268500	415	20q13.33	415	S4(2.4)	0.124	1	689	CDH4	0
chr1	181989500	182399500	410	1q25.3	410	S4(2.4)	0.003	0.049	17		0
chr12	131473500	131881500	408	12q24.33	408	S4(2.4)	0.01	0.402	200		0
chr14	22175500	22580500	405	14q11.2	405	S4(2.4)	0	0	0		0
chr3	56205500	56606500	401	3p14.3	401	S4(2.4)	0.021	0.047	87	ERC2	0
chr11	105314500	105702500	388	11q22.3	388	S4(2.4)	0.001	0	0		0
chr20	18895500	19280500	385	20p11.23	385	S4(2.4)	0	0	0	SLC24A3	0
chr11	127271500	127653500	382	11q24.2	382	S4(2.4)	0	0	0		0
chr21	19029500	19410500	381	21q21.1	381	S4(2.4)	0.001	0	0		0
chr5	113846500	114227500	381	5q22.3	381	S4(2.4)	0	0	0		0
chr10	11093500	11469500	376	10p14	376	S4(2.4)	0.008	0	0		0
chr8	57185500	57559500	374	8q12.1	374	S4(2.4)	0.002	0	0		0
chr13	25294500	25666500	372	13q12.12-13	372	S4(2.4)	0.001	0.013	5		0
chr9	922500	1291500	369	9p24.3	369	S4(2.4)	0.002	0	0		0
chr2	176253500	176621500	368	2q31.1	368	S4(2.4)	0	0	0		0
chr12	21418500	21786500	368	12p12.1	368	S4(2.4)	0.374	0.179	42		0.011	1				1
chr20	13727500	14091500	364	20p12.1	364	S4(2.4)	0.113	0.426	1311	MACROD2	0
chrX	105590500	105951500	361	Xq22.3	361	S4(2.4)	0.002	0	0		0
chr5	123292500	123649500	357	5q23.2	357	S4(2.4)	0.001	0	0		0
chr6	5381500	5737500	356	6p25.1	356	S4(2.4)	0.588	1	534	FARS2	0
chr8	68766500	69121500	355	8q13.2	355	S4(2.4)	0.001	0	0		0
chr3	17294500	17646500	352	3p24.3	352	S4(2.4)	0.001	0	0	TBC1D5	0
chr6	39290500	39642500	352	6p21.2	352	S4(2.4)	0.002	0.037	13		0
chr12	20192500	20543500	351	12p12.2	351	S4(2.4)	0.001	0	0		0
chr18	25906500	26257500	351	18q12.1	351	S4(2.4)	0.003	0.011	4		0
chrX	129902500	130247500	345	Xq26.1	345	S4(2.4)	0	0	0		0
chr5	94120500	94464500	344	5q15	344	S4(2.4)	0	0	0	MCTP1	0.251				1	1
chr5	41761500	42100500	339	5p13.1	339	S4(2.4)	0.094	0.136	24		0
chr11	26376500	26707500	331	11p14.2	331	S4(2.4)	0.105	0.967	486		0
chr4	75886500	76215500	329	4q13.3	329	S4(2.4)	0	0	0		0
chr11	88763500	89091500	328	11q14.3	328	S4(2.4)	0	0	0	GRM5	0
chr9	27357500	27683500	326	9p21.2	326	S4(2.4)	0	0	0		0
chr5	163285500	163608500	323	5q34	323	S4(2.4)	0.001	0.012	4		0
chr1	57938500	58250500	312	1p32.2	312	S4(2.4)	0	0	0	DAB1	0
chr6	19854500	20153500	299	6p22.3	299	S4(2.4)	0.001	0	0		0
chr16	16836500	17134500	298	16p12.3	298	S4(2.4)	0	0	0		0
chr4	145752500	146049500	297	4q31.21	297	S4(2.4)	0.165	0.104	48		0
chr5	61179500	61474500	295	5q12.1	295	S4(2.4)	0	0	0		0
chr2	169836500	170129500	293	2q31.1	293	S4(2.4)	0	0	0		0
chr7	109719500	110009500	290	7q31.1	290	S4(2.4)	0.001	0.01	3		0
chr8	82523500	82812500	289	8q21.13	289	S4(2.4)	0.002	0	0		0
chr14	49486500	49770500	284	14q21.3	284	S4(2.4)	0	0	0		0
chr8	104893500	105174500	281	8q22.3	281	S4(2.4)	0.025	0.932	643	RIMS2	0
chr1	163538500	163817500	279	1q23.3	279	S4(2.4)	0.001	0	0		0
chr7	31164500	31441500	277	7p14.3	277	S4(2.4)	0.001	0	0		0
chr3	139206500	139481500	275	3q23	275	S4(2.4)	0.004	0.091	124		0
chr1	71751500	72023500	272	1p31.1	272	S4(2.4)	0.008	0.048	217	NEGR1	0.311		1			1
chr2	209138500	209410500	272	2q34	272	S4(2.4)	0.335	0.364	107		0
chr11	92148500	92417500	269	11q14.3	269	S4(2.4)	0.193	1	671	FAT3	0
chr1	81767500	82034500	267	1p31.1	267	S4(2.4)	0	0	0	LPHN2	0
chr4	170855500	171122500	267	4q33	267	S4(2.4)	0.001	0.034	9		0
chr7	97334500	97592500	258	7q21.3	258	S4(2.4)	0	0	0		0
chr6	46129500	46386500	257	6p12-21	257	S4(2.4)	0.001	0.027	7		0
chr13	67360500	67616500	256	13q21.32	256	S4(2.4)	0	0	0	PCDH9	0
chr4	104191500	104443500	252	4q24	252	S4(2.4)	0	0	0		0
chr21	26318500	26569500	251	21q21.2	251	S4(2.4)	0.001	0	0		0
chrX	18813500	19063500	250	Xp22.13	250	S4(2.4)	0.055	0.248	107		0
chr13	53333500	53579500	246	13q14.3	246	S4(2.4)	0	0	0		0
chr6	104924500	105167500	243	6q16.3	243	S4(2.4)	0.001	0	0		0
chr12	55372500	55614500	242	12q13.2	242	S4(2.4)	0	0	0		0
chr6	48417500	48649500	232	6p12.3	232	S4(2.4)	0.002	0.013	3		0
chr2	199834500	200063500	229	2q33.1	229	S4(2.4)	0.001	0	0		0
chr4	27167500	27392500	225	4p15.2	225	S4(2.4)	0	0	0		0
chr3	145408500	145632500	224	3q24	224	S4(2.4)	0.002	0.076	29		0
chr3	179632500	179855500	223	3q26.33	223	S4(2.4)	0.001	0	0		0
chr6	79066500	79287500	221	6q14.1	221	S4(2.4)	0.002	0	0		0
chr1	248520500	248810500	290	1q44	218	S4(2.4)	0	0	0		0
chrX	6952500	7170500	218	Xp22.31	218	S4(2.4)	0.167	0.482	327		0
chr4	121716500	121932500	216	4q27	216	S4(2.4)	0.001	0	0		0
chr4	96039500	96250500	211	4q22.3	211	S4(2.4)	0.045	0.408	446		0
chr7	21750500	21960500	210	7p15.3	210	S4(2.4)	0.003	0	0		0
chr22	33593500	33797500	204	22q12.3	204	S4(2.4)	0	0	0	LARGE	0
chr20	24376500	24580500	204	20p11.21	204	S4(2.4)	0.012	0.373	141		0
chr8	56333500	56536500	203	8q12.1	203	S4(2.4)	0	0	0		0
chr3	25281500	25482500	201	3p24.2	201	S4(2.4)	0	0	0		0
chr1	71059500	71258500	199	1p31.1	199	S4(2.4)	0.008	0.191	46		0
chr16	8316500	8514500	198	16p13.2	198	S4(2.4)	0	0	0		0
chr1	164192500	164383500	191	1q23.3	191	S4(2.4)	0.001	0	0		0
chr5	59235500	59426500	191	5q12.1	191	S4(2.4)	0	0	0	PDE4D	0.237		1			1
chr3	62732500	62922500	190	3p14.2	190	S4(2.4)	0	0	0		0
chr6	77790500	77980500	190	6q14.1	190	S4(2.4)	0.001	0	0		0
chrX	18358500	18547500	189	Xp22.13	189	S4(2.4)	0.105	0.545	222		0
chr1	149053500	149237500	184	1q21.2	184	S4(2.4)	0.002	0.054	10		0
chr1	73037500	73221500	184	1p31.1	184	S4(2.4)	0.013	0.603	400		0
chr16	52830500	53005500	175	16q12.2	175	S4(2.4)	0	0	0		0
chr5	6949500	7119500	170	5p15.31	170	S4(2.4)	0	0	0		0
chr4	175245500	175413500	168	4q34.1	168	S4(2.4)	0.032	0.369	103		0
chr6	9877500	10040500	163	6p24.3	163	S4(2.4)	0.001	0	0	OFCC1	0.774			1		1
chrX	96567500	96730500	163	Xq21.33	163	S4(2.4)	0.201	1	949	DIAPH2	0
chr1	174394500	174550500	156	1q25.1	156	S4(2.4)	0.508	1	840	RABGAP1L	0
chr2	57892500	58044500	152	2p16.1	152	S4(2.4)	0.001	0	0		0
chr2	138522500	138673500	151	2q22.1	151	S4(2.4)	0	0	0		0
chr8	33518500	33668500	150	8p12	150	S4(2.4)	0	0	0		0
chr18	7692500	7838500	146	18p11.23	146	S4(2.4)	0.771	1	845	PTPRM	0
chr9	104531500	104677500	146	9q31.1	146	S4(2.4)	0	0	0		0
chr2	163446500	163590500	144	2q24.2	144	S4(2.4)	0.001	0	0		0
chr3	79455500	79596500	141	3p12.3	141	S4(2.4)	0.001	0.035	5	ROBO1	0
chr2	138925500	139065500	140	2q22.1	140	S4(2.4)	0.002	0	0		0
chr9	12426500	12566500	140	9p23	140	S4(2.4)	0.001	0.029	4		0
chr4	11539500	11679500	140	4p15.33	140	S4(2.4)	0	0	0		0
chrX	30965500	31101500	136	Xp21.2	136	S4(2.4)	0	0	0		0
chr12	71192500	71325500	133	12q15	133	S4(2.4)	0.002	0	0		0
chr7	143758500	143890500	132	7q35	132	S4(2.4)	0.001	0	0		0
chr8	71742500	71872500	130	8q13.3	130	S4(2.4)	0.003	0	0		0
chr6	51730500	51859500	129	6p12.2-3	129	S4(2.4)	0.001	0	0		0
chr7	133094500	133218500	124	7q33	124	S4(2.4)	0.67	1	875	EXOC4	1	1				1
chrX	18547500	18665500	118	Xp22.13	118	S4(2.4)	0.182	1	222		0
chr4	58417500	58529500	112	4q12	112	S4(2.4)	0	0	0		0
chr18	39724500	39833500	109	18q12.3	109	S4(2.4)	0.019	0.376	231	LINC00907	0
chr3	87426500	87534500	108	3p11.2	108	S4(2.4)	0.012	0.38	41		0
chr14	85517500	85622500	105	14q31.3	105	S4(2.4)	0	0	0		0
chr7	89540500	89641500	101	7q21.13	101	S4(2.4)	0.001	0	0		0
chr11	89390500	89488500	98	11q14.3	98	S4(2.4)	0	0	0		0
chr6	224500	318500	94	6p25.3	94	S4(2.4)	0.037	0.287	78		0
chrX	14192500	14283500	91	Xp22.2	91	S4(2.4)	0.019	0.033	3		0
chr20	14618500	14699500	81	20p12.1	81	S4(2.4)	0.028	1	1311	MACROD2	0
chr5	128216500	128290500	74	5q23.3	74	S4(2.4)	0.006	0	0		0
chr5	101676500	101747500	71	5q21.1	71	S4(2.4)	0.001	0	0		0
chrX	83517500	83584500	67	Xq21.1	67	S4(2.4)	0.001	0	0		0
chr9	68973500	69798500	825	9q21.11	58	S4(2.4)	0.001	0.016	49		0
chr2	210485500	210542500	57	2q34	57	S4(2.4)	0.155	1	314		0
chr4	20916500	20972500	56	4p15.31	56	S4(2.4)	0	0	0	KCNIP4	0
chrX	22474500	22528500	54	Xp22.11	54	S4(2.4)	0.001	0	0	RP11-40F8.2	0
chr9	68395500	68445500	50	9q13	50	S4(2.4)	0.01	0.42	21		0
chr17	25319500	25361500	42	17q11.1	42	S4(2.4)	0	0	0		0
chr6	373500	392500	19	6p25.3	19	S4(2.4)	0	0	0		0
chr17	21508500	21522500	14	17p11.2	14	S4(2.4)	0	0	0		0
chr8	145500	146500	1	8p23.3	1	S4(2.4)	0	0	0		0
chr4	33881500	33882500	1	4p15.1	1	S4(2.4)	0.001	0	0		0
chrX	8574500	8575500	1	Xp22.31	1	S4(2.4)	0	0	0		0
chrX	154476500	154477500	1	Xq28	1	S4(2.4)	0.129	1	34		0
chr2	210183500	210184500	1	2q34	1	S4(2.4)	0.001	0	0		0
chr19	52759500	54131500	1372	19q13.41-42	1372	S3(2.5)	0.131	0.487	80		0
chr20	22732500	23875500	1143	20p11.21	1143	S3(2.5)	0.019	0.075	43		0
chr13	107899500	108770500	871	13q33.3	871	S3(2.5)	0	0	0	FAM155A	0
chr4	111264500	112053500	789	4q25	789	S3(2.5)	0.001	0	0		0
chr3	143071500	143850500	779	3q24	779	S3(2.5)	0.014	0.221	295	SLC9A9	0
chr7	149520500	150237500	717	7q36.1	717	S3(2.5)	0.009	0.13	48		0
chr10	18629500	19322500	693	10p12.31-32	693	S3(2.5)	0.085	0.356	407		0
chr8	9441500	10123500	682	8p23.1	682	S3(2.5)	0.582	0.622	380		0
chr4	147224500	147860500	636	4q31.22	636	S3(2.5)	0.002	0.022	10		0
chr6	84415500	85049500	634	6q14.2-3	634	S3(2.5)	0.133	0.421	125		0
chr2	146692500	147289500	597	2q22.3	597	S3(2.5)	0.001	0.007	4		0
chr13	107305500	107899500	594	13q33.3	594	S3(2.5)	0.001	0	0	FAM155A	0
chr9	6974500	7564500	590	9p24.1	590	S3(2.5)	0.278	0.412	457		0
chr16	51672500	52227500	555	16q12.1	555	S3(2.5)	0	0.009	5		0
chr7	135859500	136377500	518	7q33	518	S3(2.5)	0	0	0		0
chr4	68830500	69346500	516	4q13.2	516	S3(2.5)	0.002	0.012	6		0
chr8	70656500	71168500	512	8q13.3	512	S3(2.5)	0.001	0.006	3		0
chr6	166218500	166729500	511	6q27	511	S3(2.5)	0.001	0	0	PDE10A	0
chr3	120792500	121289500	497	3q13.33	497	S3(2.5)	0.001	0.008	4	STXBP5L	0
chr11	120545500	121017500	472	11q23.3	472	S3(2.5)	0.117	0.222	105		0
chr1	230320500	230791500	471	1q42.13-2	471	S3(2.5)	0.339	0.259	225		0
chr3	160763500	161218500	455	3q26.1	455	S3(2.5)	0.197	0.327	91		0
chr5	168212500	168648500	436	5q34-35	436	S3(2.5)	0.001	0	0	SLIT3	0
chr1	146475500	146899500	424	1q21.1	424	S3(2.5)	0.195	0.358	76		0
chr10	77495500	77912500	417	10q22.2-3	417	S3(2.5)	0.008	0	0	C10orf11	0
chr9	73712500	74124500	412	9q21.12-13	412	S3(2.5)	0	0	0	TRPM3	0
chr6	88854500	89259500	405	6q15	405	S3(2.5)	0	0	0		0
chr9	103540500	103944500	404	9q31.1	404	S3(2.5)	0	0	0		0
chr7	24007500	24403500	396	7p15.3	396	S3(2.5)	0	0	0		0
chr11	16235500	16631500	396	11p15.1	396	S3(2.5)	0.001	0	0	SOX6	0
chr1	57493500	57884500	391	1p32.2	391	S3(2.5)	0	0	0	DAB1	0
chr4	109001500	109385500	384	4q25	384	S3(2.5)	0	0	0		0
chr2	66125500	66500500	375	2p14	375	S3(2.5)	0	0	0	AC074391.1	0
chr8	5829500	6198500	369	8p23.2	369	S3(2.5)	0.001	0	0		0
chr3	70154500	70520500	366	3p13	366	S3(2.5)	0	0	0		0
chr15	100533500	100893500	360	15q26.3	360	S3(2.5)	0	0	0		0
chr8	53171500	53527500	356	8q11.23	356	S3(2.5)	0	0	0		0
chr3	41286500	41642500	356	3p22.1	356	S3(2.5)	0.006	0.087	77	ULK4	0
chr11	4831500	5186500	355	11p15.4	355	S3(2.5)	0	0	0		0
chr17	66956500	67305500	349	17q24.2-3	349	S3(2.5)	0.001	0.023	8		0
chr1	147081500	147418500	337	1q21.2	337	S3(2.5)	0.015	0.068	92		0
chr3	39818500	40153500	335	3p22.1	335	S3(2.5)	0.005	0.158	40		0
chr22	26212500	26541500	329	22q12.1	329	S3(2.5)	0	0	0		0
chr4	128062500	128389500	327	4q28.1	327	S3(2.5)	0.001	0	0		0
chr11	104074500	104394500	320	11q22.3	320	S3(2.5)	0.001	0	0		0
chr11	109192500	109510500	318	11q22.3	318	S3(2.5)	0.014	0.022	7		0
chr3	74221500	74534500	313	3p12.3	313	S3(2.5)	0.002	0	0		0
chr9	19721500	20029500	308	9p21-22	308	S3(2.5)	0	0	0		0
chr16	77948500	78256500	308	16q23.1	308	S3(2.5)	0.027	0.623	881	WWOX	0.712			1	1	2
chr3	169082500	169386500	304	3q26.2	304	S3(2.5)	0.001	0	0	MECOM	0
chr12	11092500	11395500	303	12p13.2	303	S3(2.5)	0.071	0.241	343		0
chr13	76706500	77004500	298	13q22.2	298	S3(2.5)	0.002	0	0		0
chr8	76822500	77114500	292	8q21.11	292	S3(2.5)	0.001	0	0		0
chr4	68125500	68406500	281	4q13.2	281	S3(2.5)	0.001	0	0		0
chr3	31648500	31928500	280	3p23	280	S3(2.5)	0.392	0.225	137		0
chr5	66822500	67095500	273	5q13.1	273	S3(2.5)	0.002	0.011	3		0
chr11	100139500	100408500	269	11q22.1	269	S3(2.5)	0.001	0	0	CNTN5	1	1				1
chr2	58462500	58728500	266	2p16.1	266	S3(2.5)	0.005	0.015	4	AC007092.1	0
chr4	108294500	108559500	265	4q25	265	S3(2.5)	0.001	0.03	8		0
chr3	146726500	146990500	264	3q24	264	S3(2.5)	0.001	0.011	3		0
chr6	28464500	28724500	260	6p22.1	260	S3(2.5)	0.025	0.119	12		0
chr20	6187500	6445500	258	20p12.3	258	S3(2.5)	0.007	0.019	5		0
chr8	88713500	88967500	254	8q21.3	254	S3(2.5)	0	0	0		0
chr18	51455500	51706500	251	18q21.2	251	S3(2.5)	0.001	0	0		0
chr17	8824500	9074500	250	17p13.1	250	S3(2.5)	0.001	0	0		0
chr5	75269500	75518500	249	5q13.3	249	S3(2.5)	0	0	0		0
chr5	108937500	109182500	245	5q21.3	245	S3(2.5)	2.01	0.641	193		0
chr5	81902500	82144500	242	5q14.2	242	S3(2.5)	0.001	0.012	3		0
chr14	34314500	34555500	241	14q13.1	241	S3(2.5)	0.001	0.029	7	EGLN3	0
chr16	47295500	47531500	236	16q12.1	236	S3(2.5)	0.109	0.157	262		0
chr8	39480500	39715500	235	8p11.21-22	235	S3(2.5)	0.001	0	0		0
chr1	37410500	37645500	235	1p34.3	235	S3(2.5)	0	0	0		0
chr2	228842500	229077500	235	2q36.3	235	S3(2.5)	0	0	0		0
chr2	171182500	171415500	233	2q31.1	233	S3(2.5)	0.001	0	0		0
chr5	119005500	119238500	233	5q23.1	233	S3(2.5)	0	0	0		0
chr2	88534500	88765500	231	2p11.2	231	S3(2.5)	0	0	0		0
chrX	30141500	30371500	230	Xp21.2	230	S3(2.5)	0	0	0		0
chr6	15427500	15652500	225	6p22.3	225	S3(2.5)	0.641	0.551	311		0
chr14	60178500	60402500	224	14q23.1	224	S3(2.5)	0	0	0		0
chr21	17676500	17900500	224	21q21.1	224	S3(2.5)	0.18	1	513	LINC00478	0
chr12	84385500	84602500	217	12q21.31	217	S3(2.5)	0.001	0	0		0
chr4	18915500	19119500	204	4p15.31	204	S3(2.5)	0	0	0		0
chr11	5811500	6013500	202	11p15.4	202	S3(2.5)	0	0	0		0
chr22	25458500	25657500	199	22q11.23	199	S3(2.5)	0.053	0.719	247		0
chr15	47362500	47558500	196	15q21.1	196	S3(2.5)	0	0	0	SEMA6D	0
chr11	7235500	7426500	191	11p15.4	191	S3(2.5)	0	0	0		0
chr1	158800500	158991500	191	1q23.1	191	S3(2.5)	0.075	0.126	74		0
chr10	117420500	117611500	191	10q25.3	191	S3(2.5)	0.005	0.094	20	ATRNL1	0
chr6	170314500	170494500	180	6q27	180	S3(2.5)	0	0	0		0
chr4	80500	259500	179	4p16.3	179	S3(2.5)	0.456	0.877	125		0
chr8	6873500	7262500	389	8p23.1	176	S3(2.5)	0	0	0		0
chr4	49611500	52762500	3151	4p-q	170	S3(2.5)	0.021	0.017	74		0
chr18	37279500	37448500	169	18q12.3	169	S3(2.5)	0	0	0	LINC00669	0
chr6	64622500	64790500	168	6q12	168	S3(2.5)	0	0	0	EYS	0
chrX	134543500	134708500	165	Xq26.3	165	S3(2.5)	0.019	0.248	35		0
chr7	111015500	111174500	159	7q31.1	159	S3(2.5)	0.002	0.031	5	IMMP2L	0
chr3	68800500	68957500	157	3p14.1	157	S3(2.5)	0	0	0		0
chrX	38404500	38561500	157	Xp11.4	157	S3(2.5)	0	0	0	TM4SF2	0
chr14	33295500	33450500	155	14q12-13	155	S3(2.5)	0.02	0.632	493	AKAP6,NPAS3	0
chr12	15155500	15309500	154	12p12.3	154	S3(2.5)	0	0	0		0
chr18	8027500	8178500	151	18p11.23	151	S3(2.5)	1.086	1	845	PTPRM	0
chrX	18665500	18813500	148	Xp22.13	148	S3(2.5)	0.001	0.007	222		0
chr13	38649500	38797500	148	13q13.3	148	S3(2.5)	0.001	0.02	3		0
chr21	9804500	9950500	146	21p11.2	146	S3(2.5)	0.461	0.199	67		0
chr1	209024500	209169500	145	1q32.2	145	S3(2.5)	0.001	0	0		0
chr9	26146500	26282500	136	9p21.2	136	S3(2.5)	0.006	0.066	9		0
chrX	2105500	2238500	133	Xp22.33	133	S3(2.5)	0	0	0		0
chr16	53005500	53137500	132	16q12.2	132	S3(2.5)	0.198	0.371	285		0
chr16	31897500	32030500	133	16p11.2	129	S3(2.5)	0.386	0.368	59		0
chr10	26797500	26925500	128	10p12.1	128	S3(2.5)	0.352	0.945	152		0
chr20	15620500	15747500	127	20p12.1	127	S3(2.5)	0.01	0	0	MACROD2	0
chr10	22351500	22477500	126	10p12.31	126	S3(2.5)	0	0	0		0
chr14	25731500	25853500	122	14q12	122	S3(2.5)	0	0	0		0
chr7	133565500	133681500	116	7q33	116	S3(2.5)	0.67	1	875	EXOC4	0
chr3	62185500	62298500	113	3p14.2	113	S3(2.5)	0.707	1	758	PTPRG	0
chr16	72594500	72704500	110	16q22.2	110	S3(2.5)	0.004	0.064	126		0
chr6	102153500	102262500	109	6q16.3	109	S3(2.5)	0.002	0	0	GRIK2	0
chr2	149118500	149225500	107	2q23.1	107	S3(2.5)	0.792	0.963	361		0
chr14	37805500	37909500	104	14q21.1	104	S3(2.5)	0.166	1	367		1				1	1
chr3	146576500	146670500	94	3q24	94	S3(2.5)	0.002	0	0		0
chr11	23634500	23727500	93	11p14.3	93	S3(2.5)	0.001	0	0		0
chr4	49089500	49182500	93	4p11	93	S3(2.5)	0.001	0	0		0
chr10	45805500	45894500	89	10q11.21	89	S3(2.5)	0	0	0		0
chr9	66868500	67354500	486	9q13	88	S3(2.5)	0	0.031	17		0
chr2	58998500	59084500	86	2p16.1	86	S3(2.5)	0	0	0	AC007092.1	0
chr18	38505500	38589500	84	18q12.3	84	S3(2.5)	0.001	0	0		0
chrX	29294500	29377500	83	Xp21.2-3	83	S3(2.5)	0	0	0	IL1RAPL1	0
chr10	127559500	127633500	74	10q26.2	74	S3(2.5)	0.111	0.662	174		0
chr1	121321500	121464500	143	1p11.2	71	S3(2.5)	0	0	0		0
chr20	25812500	25880500	68	20p11.1	68	S3(2.5)	0	0	0		0
chrX	148396500	148464500	68	Xq28	68	S3(2.5)	0	0	0		0
chr14	67047500	67098500	51	14q23.3	51	S3(2.5)	0.301	1	682	GPHN	0
chr21	10772500	10816500	44	21p11.2	44	S3(2.5)	0.019	0.955	84		0
chr13	34964500	34975500	11	13q13.2	11	S3(2.5)	0	0	0		0
chr2	133100500	133110500	10	2q21.2	10	S3(2.5)	0.011	0	0		0
chr18	61879500	61888500	9	18q22.1	9	S3(2.5)	0.001	0	0		0
chr9	66487500	66493500	6	9q13	6	S3(2.5)	0	0	0		0
chrX	20726500	20727500	1	Xp22.12	1	S3(2.5)	0.001	0	0		0
chr2	59229500	59230500	1	2p16.1	1	S3(2.5)	0	0	0	AC007092.1	0
chr6	102262500	102263500	1	6q16.3	1	S3(2.5)	0.002	0	0	GRIK2	0
chr17	25257500	25258500	1	17q11.1	1	S3(2.5)	0	0	0		0
chr2	229077500	230142500	1065	2q36.3	1065	S3(2.6)	0	0	0		0
chr14	94917500	95906500	989	14q32.13	989	S3(2.6)	0.003	0.034	25		0
chr1	164561500	165437500	876	1q23.3	876	S3(2.6)	0.348	0.342	334		0.035				1	1
chr16	77153500	77817500	664	16q23.1	664	S3(2.6)	0.012	0.066	22		0
chr12	107818500	108464500	646	12q23.3	646	S3(2.6)	0.098	0.457	339		0
chr8	135014500	135643500	629	8q24.22	629	S3(2.6)	0	0	0		0
chr9	96058500	96613500	555	9q22.31-32	555	S3(2.6)	0.428	0.414	125		0
chr6	126781500	127321500	540	6q22.32-33	540	S3(2.6)	0.007	0.081	164		0
chr8	15452500	15982500	530	8p22	530	S3(2.6)	0.337	0.377	255		0
chr13	40491500	40976500	485	13q14.11	485	S3(2.6)	0	0	0		0
chr1	117008500	117442500	434	1p13.1	434	S3(2.6)	0	0	0		0
chr14	70457500	70886500	429	14q24.2	429	S3(2.6)	0.001	0	0		0
chr2	205715500	206134500	419	2q33.3	419	S3(2.6)	0.542	1	1081	PARD3B	0.198	1				1
chr10	124355500	124743500	388	10q26.13	388	S3(2.6)	0.012	0.206	55		0
chr7	111362500	111746500	384	7q31.1	384	S3(2.6)	0	0	0		0
chr2	149772500	150153500	381	2q23.1-2	381	S3(2.6)	0.171	0.499	190		0
chr2	200167500	200548500	381	2q33.1	381	S3(2.6)	0.004	0.018	4		0
chr2	177399500	177777500	378	2q31.1	378	S3(2.6)	0.046	0.743	369		0
chr11	70525500	70895500	370	11q13.4	370	S3(2.6)	0	0	0	SHANK2	0
chr10	86299500	86661500	362	10q23.1	362	S3(2.6)	0.002	0.057	237		0
chr1	62331500	62679500	348	1p31.3	348	S3(2.6)	0.146	0.876	428		0
chr18	72317500	72661500	344	18q22.3	344	S3(2.6)	0.817	1	515	ZNF407	0
chr4	156649500	156971500	322	4q32.1	322	S3(2.6)	0.002	0.016	5		0
chr8	26639500	26948500	309	8p21.2	309	S3(2.6)	0.004	0.188	67		0
chr12	70401500	70707500	306	12q15	306	S3(2.6)	0.609	0.248	124		0
chr16	53137500	53440500	303	16q12.2	303	S3(2.6)	1.821	0.779	285		0
chr10	100637500	100925500	288	10q24.2	288	S3(2.6)	0.001	0	0	HPSE2	0
chr2	176919500	177207500	288	2q31.1	288	S3(2.6)	0.251	0.472	105		0
chr7	7015500	7288500	273	7p22.1	273	S3(2.6)	0.383	0.341	99		0
chr5	93752500	94022500	270	5q15	270	S3(2.6)	0.124	0.256	100		0.339			1	1	2
chr5	140331500	140587500	256	5q31.3	256	S3(2.6)	0.013	0.327	23		0
chr1	87902500	88157500	255	1p22.3	255	S3(2.6)	0.001	0	0		0
chr4	102638500	102889500	251	4q24	251	S3(2.6)	0.016	0.713	289	BANK1	0
chr20	37661500	37904500	243	20q12	243	S3(2.6)	0.046	0.082	87		0
chr2	157434500	157665500	231	2q24.1	231	S3(2.6)	0.058	0.143	172		0
chr1	157430500	157660500	230	1q23.1	230	S3(2.6)	0	0	0		0
chr20	9688500	9912500	224	20p12.2	224	S3(2.6)	0	0	0		0
chr4	115491500	115714500	223	4q26	223	S3(2.6)	0.001	0	0		0
chr4	150203500	150424500	221	4q31.23	221	S3(2.6)	0	0	0	RP11-526A4.1	0
chr20	46685500	46900500	215	20q13.13	215	S3(2.6)	0.001	0	0		0
chr5	162640500	162849500	209	5q34	209	S3(2.6)	0	0	0		0
chr8	73168500	73376500	208	8q13.3	208	S3(2.6)	0.001	0.014	3		0
chr4	5995500	6197500	202	4p16.1-2	202	S3(2.6)	0	0	0		0
chr2	143845500	144044500	199	2q22.2	199	S3(2.6)	0	0	0	ARHGAP15	0
chr8	24247500	24439500	192	8p21.2	192	S3(2.6)	0	0	0	RP11-624C23.1	0
chr11	131154500	131346500	192	11q25	192	S3(2.6)	0	0	0	NTM	0
chr3	121647500	121838500	191	3q13.33	191	S3(2.6)	0.001	0	0		0
chr4	106953500	107143500	190	4q24	190	S3(2.6)	0.001	0	0		0
chr3	39629500	39818500	189	3p22.1	189	S3(2.6)	0.002	0.069	10		0
chr3	190528500	190714500	186	3q28	186	S3(2.6)	0.011	0.134	21		0
chr8	79294500	79476500	182	8q21.12	182	S3(2.6)	0.067	0.264	90		0
chr16	55822500	56003500	181	16q12.2	181	S3(2.6)	0	0	0		0
chr3	18094500	18274500	180	3p24.3	180	S3(2.6)	0.006	0	0	TBC1D5	0
chr2	153702500	153880500	178	2q23.3	178	S3(2.6)	0.002	0	0		0
chr11	43229500	43407500	178	11p12	178	S3(2.6)	0.572	0.421	141		0
chr6	118240500	118418500	178	6q22.1-2	178	S3(2.6)	0	0	0		0
chr7	103852500	104027500	175	7q22.2	175	S3(2.6)	0	0	0	LHFPL3	0
chr12	90864500	91036500	172	12q21.33	172	S3(2.6)	0.001	0.047	8		0
chr22	22905500	23075500	170	22q11.22	170	S3(2.6)	0	0	0		0
chr6	101984500	102153500	169	6q16.3	169	S3(2.6)	0.002	0	0	GRIK2	0.315	1				1
chr5	16179500	16347500	168	5p15.1	168	S3(2.6)	0	0	0		0
chr13	67616500	67779500	163	13q21.32	163	S3(2.6)	0	0	0	PCDH9	0
chr13	60399500	60559500	160	13q21.2	160	S3(2.6)	0.003	0	0		0.184		1			1
chr3	61660500	61818500	158	3p14.2	158	S3(2.6)	0.696	1	758	PTPRG	0
chr5	157579500	157732500	153	5q33.3	153	S3(2.6)	0	0	0		0
chrX	134708500	134856500	148	Xq26.3	148	S3(2.6)	0	0	0		0
chr2	59084500	59229500	145	2p16.1	145	S3(2.6)	0.001	0	0	AC007092.1	0
chr7	110359500	110502500	143	7q31.1	143	S3(2.6)	0	0	0	IMMP2L	0
chr5	57941500	58081500	140	5q11.2	140	S3(2.6)	0	0	0		0
chr4	107571500	107710500	139	4q24-25	139	S3(2.6)	0.021	1	287		0
chr4	184861500	185000500	139	4q35.1	139	S3(2.6)	0.004	0.266	37		0
chr19	6882500	7021500	139	19p13.2-3	139	S3(2.6)	0	0	0		0
chr11	32340500	32478500	138	11p13	138	S3(2.6)	0	0	0		0
chr5	65892500	66027500	135	5q12.3	135	S3(2.6)	0.005	0	0	MAST4	0
chr2	99337500	99468500	131	2q11.2	131	S3(2.6)	0	0	0		0
chr1	211029500	211158500	129	1q32.2	129	S3(2.6)	0.001	0	0		0
chr8	116480500	116602500	122	8q23.3	122	S3(2.6)	0.001	0	0		0
chr13	103640500	103760500	120	13q33.1	120	S3(2.6)	0	0	0		0.266		1			1
chr21	27288500	27399500	111	21q21.3	111	S3(2.6)	0.008	0.036	4		0
chr2	132041500	132150500	109	2q21.1	109	S3(2.6)	0.001	0	0		0
chr2	56501500	56608500	107	2p16.1	107	S3(2.6)	1.436	1	230		0
chr2	162498500	162595500	97	2q24.2	97	S3(2.6)	0	0	0	SLC4A10	0
chr4	173705500	173801500	96	4q34.1	96	S3(2.6)	0	0	0	GALNTL6	0
chr6	81782500	81876500	94	6q14.1	94	S3(2.6)	0	0	0		0
chr13	46536500	46628500	92	13q14.13	92	S3(2.6)	0.005	0.022	7		0
chr14	66957500	67047500	90	14q23.3	90	S3(2.6)	0.144	0.811	682	GPHN	0
chr14	42617500	42706500	89	14q21.1	89	S3(2.6)	0.004	0	0		0
chr11	23467500	23554500	87	11p14.3	87	S3(2.6)	0.001	0	0		0
chr1	99514500	99601500	87	1p21.3	87	S3(2.6)	0	0	0		0
chr5	83370500	83456500	86	5q14.3	86	S3(2.6)	0.001	0	0		0
chrX	25144500	25228500	84	Xp21.3	84	S3(2.6)	0	0	0		0
chr4	17867500	17950500	83	4p15.31	83	S3(2.6)	0.002	0	0		0
chr18	38589500	38672500	83	18q12.3	83	S3(2.6)	0.001	0	0		0
chr12	9603500	9685500	82	12p13.31	82	S3(2.6)	0.001	0	0		0
chr18	37448500	37528500	80	18q12.3	80	S3(2.6)	0	0	0		0
chr11	23554500	23634500	80	11p14.3	80	S3(2.6)	0.001	0	0		0
chr2	7998500	8077500	79	2p25.1	79	S3(2.6)	0.004	0	0		0
chr7	124062500	124139500	77	7q31.33	77	S3(2.6)	0.001	0	0		0
chr9	13155500	13232500	77	9p23	77	S3(2.6)	0	0	0		0
chr15	94822500	94898500	76	15q26.2	76	S3(2.6)	0.101	1	251		0
chr15	32392500	32464500	72	15q13.3	72	S3(2.6)	0.001	0	0		0
chr7	124139500	124200500	61	7q31.33	61	S3(2.6)	0.001	0	0		0
chr4	24300500	24361500	61	4p15.2	61	S3(2.6)	0	0	0		0
chr16	22922500	22982500	60	16p12.2	60	S3(2.6)	0	0	0		0
chr13	86105500	86161500	56	13q31.1	56	S3(2.6)	0	0	0		0
chr3	146670500	146726500	56	3q24	56	S3(2.6)	0.002	0	0		0
chr5	136320500	136375500	55	5q31.2	55	S3(2.6)	0.001	0	0	SPOCK1	0
chr7	152077500	152131500	54	7q36.1	54	S3(2.6)	0.002	0	0		0
chr18	38452500	38505500	53	18q12.3	53	S3(2.6)	0.001	0	0		0
chr6	89259500	89312500	53	6q15	53	S3(2.6)	0	0	0		0
chr6	102263500	102312500	49	6q16.3	49	S3(2.6)	0.002	0	0	GRIK2	0
chr1	71703500	71751500	48	1p31.1	48	S3(2.6)	0.026	1	217		0
chr2	230142500	230166500	24	2q36.3	24	S3(2.6)	0	0	0		0
chr8	58841500	58865500	24	8q12.1	24	S3(2.6)	0	0	0		0
chr8	46857500	46859500	2	8q11.1	2	S3(2.6)	0	0	0		0
chrX	11858500	11859500	1	Xp22.2	1	S3(2.6)	0.001	0	0		0
chr1	142559500	142560500	1	1q12	1	S3(2.6)	0	0	0		0
chr6	39642500	39643500	1	6p21.2	1	S3(2.6)	0	0	0		0
chrX	487500	1394500	907	Xp22.33	717	S3(2.7)	0	0	0		0
chr5	88126500	88744500	618	5q14.3	618	S3(2.7)	0.004	0.065	37	MEF2C-AS1	0
chr5	135709500	136320500	611	5q31.1-2	611	S3(2.7)	0.001	0	0	SPOCK1	0
chr13	36682500	37209500	527	13q13.3	527	S3(2.7)	0.009	0.08	42		0
chr1	219878500	220365500	487	1q41	487	S3(2.7)	0.074	0.14	68		0
chr11	100714500	101184500	470	11q22.1	470	S3(2.7)	0.075	0.332	305		0
chr20	55549500	55960500	411	20q13.31	411	S3(2.7)	0.101	0.085	41		1				1	1
chr4	110145500	110556500	411	4q25	411	S3(2.7)	0.726	0.491	132		0
chr5	58843500	59235500	392	5q11-12	392	S3(2.7)	0	0	0	PDE4D	0
chr1	116495500	116839500	344	1p13.1	344	S3(2.7)	0.389	0.436	77		0
chrX	113792500	114124500	332	Xq23	332	S3(2.7)	0.001	0.009	3		0
chr2	210184500	210485500	301	2q34	301	S3(2.7)	0.102	0.654	314		0
chr4	85663500	85952500	289	4q21.23	289	S3(2.7)	0.014	0.228	68		0
chr16	23822500	24105500	283	16p12.2	283	S3(2.7)	0	0	0		0
chr12	4780500	5062500	282	12p13.32	282	S3(2.7)	0.04	0.11	54		0
chr4	21725500	22001500	276	4p15.2	276	S3(2.7)	0.002	0	0	KCNIP4	0
chr12	101539500	101812500	273	12q23.1-2	273	S3(2.7)	0.182	0.491	134		0
chr2	230254500	230523500	269	2q36.3	269	S3(2.7)	0.001	0	0		0
chr14	93943500	94208500	265	14q32.12	265	S3(2.7)	0.001	0	0		0
chr13	101370500	101629500	259	13q32.3	259	S3(2.7)	0	0	0		0
chr13	94101500	94359500	258	13q31.3	258	S3(2.7)	0.401	1	1204	GPC6	0
chr13	100945500	101196500	251	13q32.3	251	S3(2.7)	0.555	1	464		0
chr6	48649500	48891500	242	6p12.3	242	S3(2.7)	0.001	0	0		0
chr13	65167500	65404500	237	13q21.31	237	S3(2.7)	0.003	0	0		0
chr10	125652500	125886500	234	10q26.13	234	S3(2.7)	0	0	0		0
chr5	105565500	105798500	233	5q21.3	233	S3(2.7)	0.002	0	0		0
chr10	12602500	12826500	224	10p13	224	S3(2.7)	0.072	1	491		0
chr9	17733500	17947500	214	9p22.2	214	S3(2.7)	0	0	0		0
chr2	207289500	207498500	209	2q33.3	209	S3(2.7)	0.072	0.856	179		0
chr8	79682500	79891500	209	8q21.12	209	S3(2.7)	0.055	1	187		0
chr18	42311500	42517500	206	18q12.3	206	S3(2.7)	0.445	1	405		0
chr3	81479500	81676500	197	3p12.2	197	S3(2.7)	0.002	0	0		0
chr5	19798500	19995500	197	5p14.3	197	S3(2.7)	0	0	0	CDH18	0
chr5	155576500	155772500	196	5q33.2-3	196	S3(2.7)	0.155	1	978	SGCD	0
chr18	10821500	11016500	195	18p11.21-22	195	S3(2.7)	0.002	0	0		0
chr13	39945500	40138500	193	13q13-14	193	S3(2.7)	0	0	0		0
chr3	178303500	178494500	191	3q26.32	191	S3(2.7)	0	0	0	KCNMB2	0
chr10	82326500	82517500	191	10q23.1	191	S3(2.7)	0.001	0	0		0
chr7	138031500	138218500	187	7q33-34	187	S3(2.7)	0.26	0.396	139		0
chr12	21786500	21972500	186	12p12.1	186	S3(2.7)	0.002	0.097	18		0
chr8	61385500	61570500	185	8q12.1	185	S3(2.7)	2.939	0.611	113		0.321		1			1
chr5	36371500	36556500	185	5p13.2	185	S3(2.7)	0.002	0	0		0
chr2	169421500	169606500	185	2q24.3	185	S3(2.7)	0.561	1	331		0
chr1	146899500	147081500	182	1q21.1-2	182	S3(2.7)	0.068	0.379	92		0
chr4	108112500	108294500	182	4q25	182	S3(2.7)	0	0	0		0
chr4	183229500	183409500	180	4q35.1	180	S3(2.7)	1.026	1	683	TENM3	0
chr21	17900500	18071500	171	21q21.1	171	S3(2.7)	0.102	0.561	513	LINC00478	0
chr12	20543500	20714500	171	12p12.2	171	S3(2.7)	0.025	0.023	4		0
chr1	229088500	229255500	167	1q42.13	167	S3(2.7)	0	0	0		0
chr2	141674500	141841500	167	2q22.1	167	S3(2.7)	0.001	0	0	LRP1B	0
chr11	87327500	87489500	162	11q14.2	162	S3(2.7)	0.006	0	0		0
chr7	124200500	124359500	159	7q31.33	159	S3(2.7)	0.001	0	0		0
chr18	34761500	34920500	159	18q12.2	159	S3(2.7)	0.081	0.44	415		0
chr9	2887500	3042500	155	9p24.2	155	S3(2.7)	0	0	0		0
chr4	189850500	190004500	154	4q35.2	154	S3(2.7)	0.002	0	0		0
chr3	117702500	117856500	154	3q13.32	154	S3(2.7)	0.001	0	0	LSAMP,RP11-384F7.1	1		1			1
chr5	15671500	15823500	152	5p15.1	152	S3(2.7)	1.194	1	502		0
chr3	36336500	36486500	150	3p22.3	150	S3(2.7)	0.153	0.433	175		0
chr12	4634500	4780500	146	12p13.32	146	S3(2.7)	0.282	0.432	54		0
chr1	197070500	197210500	140	1q31.3	140	S3(2.7)	0.038	0.293	149		0
chr3	88032500	88161500	129	3p11.1	129	S3(2.7)	0.646	1	267		0
chr5	158124500	158247500	123	5q33.3	123	S3(2.7)	0.001	0	0		0
chr2	17747500	17868500	121	2p24.2	121	S3(2.7)	0	0	0		0
chr2	132979500	133100500	121	2q21.2	121	S3(2.7)	0.012	0.165	20		0
chr19	52641500	52759500	118	19q13.41	118	S3(2.7)	0.815	0.568	80		0
chr4	86069500	86185500	116	4q21.23	116	S3(2.7)	0.002	0	0		0
chr15	81876500	81989500	113	15q25.2	113	S3(2.7)	0	0	0		0
chr6	39643500	39754500	111	6p21.2	111	S3(2.7)	0.001	0	0		0
chr2	147289500	147395500	106	2q22.3	106	S3(2.7)	0.001	0	0		0
chr10	39145500	42404500	3259	10p-q	104	S3(2.7)	0	0.006	20		0.003		1			1
chr2	178609500	178711500	102	2q31.2	102	S3(2.7)	0.001	0	0		0
chr11	58588500	58687500	99	11q12.1	99	S3(2.7)	0.004	0.152	57		0
chr5	94022500	94120500	98	5q15	98	S3(2.7)	0.154	0.316	100	MCTP1	1				1	1
chr2	230166500	230254500	88	2q36.3	88	S3(2.7)	0	0	0		0
chr10	129255500	129342500	87	10q26.2	87	S3(2.7)	0.012	0.207	679		0
chr8	53527500	53610500	83	8q11.23	83	S3(2.7)	0.002	0	0		0
chr2	18007500	18085500	78	2p24.2	78	S3(2.7)	0.034	0.333	166		0
chr2	17936500	18007500	71	2p24.2	71	S3(2.7)	0.506	0.521	39		0
chr2	132150500	132221500	71	2q21.1	71	S3(2.7)	0.001	0	0		0
chr2	17868500	17936500	68	2p24.2	68	S3(2.7)	0.04	0.029	39		0
chr4	90549500	90609500	60	4q22.1	60	S3(2.7)	0.001	0	0		0
chr11	105950500	106009500	59	11q22.3	59	S3(2.7)	0.397	0.407	27		0
chr2	7944500	7998500	54	2p25.1	54	S3(2.7)	0.002	0	0		0
chr1	57884500	57938500	54	1p32.2	54	S3(2.7)	0	0	0	DAB1	0
chr18	6956500	7007500	51	18p11.31	51	S3(2.7)	0	0	0		0.221			1		1
chr17	21302500	21343500	41	17p11.2	41	S3(2.7)	0.016	0.585	47		0
chr3	117242500	117277500	35	3q13.31	35	S3(2.7)	0.001	0	0	LSAMP	1				1	1
chr8	43807500	43813500	6	8p11.1	6	S3(2.7)	0	0	0		0
chrX	29377500	30141500	764	Xp21.2	764	S3(2.8)	0.001	0	0	IL1RAPL1	0
chr20	14091500	14618500	527	20p12.1	527	S3(2.8)	0.028	1	1311	MACROD2	0
chr6	89943500	90427500	484	6q15	484	S3(2.8)	0.011	0.138	48		0
chr4	33882500	34335500	453	4p15.1	453	S3(2.8)	0	0	0		0
chr7	31441500	31871500	430	7p14.3	430	S3(2.8)	0	0	0	PDE1C	0.185				1	1
chr5	157732500	158124500	392	5q33.3	392	S3(2.8)	0	0	0		0
chr13	83597500	83973500	376	13q31.1	376	S3(2.8)	0.002	0.008	3		0
chr16	51300500	51672500	372	16q12.1	372	S3(2.8)	0.003	0	0		0
chr11	23101500	23467500	366	11p14.3	366	S3(2.8)	0.001	0	0		0
chr3	121289500	121647500	358	3q13.33	358	S3(2.8)	0.006	0.168	60		0
chr4	105932500	106281500	349	4q24	349	S3(2.8)	0.326	0.433	151		0
chrX	19063500	19401500	338	Xp22.12-13	338	S3(2.8)	0.057	0.21	107		0
chr13	67045500	67360500	315	13q21.32	315	S3(2.8)	0.001	0.032	6	PCDH9	0
chrX	14283500	14584500	301	Xp22.2	301	S3(2.8)	0.005	0	0		0
chr2	176621500	176919500	298	2q31.1	298	S3(2.8)	0.003	0.117	32		0
chr3	161928500	162220500	292	3q26.1	292	S3(2.8)	0.001	0	0		0
chr9	71013500	71303500	290	9q21.11	290	S3(2.8)	0.001	0.01	3		0
chr10	124743500	125029500	286	10q26.13	286	S3(2.8)	0.296	0.633	100		0
chrX	7170500	7450500	280	Xp22.31	280	S3(2.8)	0.126	0.793	327		0
chr16	83073500	83347500	274	16q23.3	274	S3(2.8)	0.746	1	1171	CDH13	0.373	1				1
chr4	156375500	156649500	274	4q32.1	274	S3(2.8)	0.001	0	0		0
chr12	14883500	15155500	272	12p12.3	272	S3(2.8)	0.032	0.426	109		0.065		1			1
chr3	167684500	167943500	259	3q26.2	259	S3(2.8)	0.002	0	0		0
chr15	55270500	55528500	258	15q21.3	258	S3(2.8)	0.001	0.027	7		0
chr11	23727500	23984500	257	11p14.3	257	S3(2.8)	0.002	0	0		0
chr8	100496500	100751500	255	8q22.2	255	S3(2.8)	1.389	1	872	VPS13B	0
chr2	138673500	138925500	252	2q22.1	252	S3(2.8)	0.017	0.226	57		0
chr6	5737500	5988500	251	6p25.1	251	S3(2.8)	0.107	0.606	534	FARS2	0
chr7	64729500	64979500	250	7q11.21	250	S3(2.8)	0.198	0.168	38		0
chrX	30732500	30965500	233	Xp21.2	233	S3(2.8)	0.016	0.099	84		0
chr2	169606500	169836500	230	2q24-31	230	S3(2.8)	0.077	0.513	331		0
chr2	214782500	215009500	227	2q34	227	S3(2.8)	0.007	0	0	SPAG16	0
chr6	97637500	97858500	221	6q16.1	221	S3(2.8)	0.001	0	0		0
chrX	11637500	11858500	221	Xp22.2	221	S3(2.8)	0.024	0.086	19	ARHGAP6	0
chrX	154264500	154476500	212	Xq28	212	S3(2.8)	0.273	0.604	61		0
chr4	28216500	28428500	212	4p15.1	212	S3(2.8)	0.033	0.255	537		0
chr8	79476500	79682500	206	8q21.12	206	S3(2.8)	0.289	0.738	172		0
chrX	31101500	31304500	203	Xp21.2	203	S3(2.8)	0	0	0	DMD	0
chr8	132765500	132967500	202	8q24.22	202	S3(2.8)	0.424	0.257	118		0
chr1	220601500	220797500	196	1q41	196	S3(2.8)	0.001	0	0		0
chr4	17950500	18144500	194	4p15.31	194	S3(2.8)	0.001	0	0		0
chr2	177207500	177399500	192	2q31.1	192	S3(2.8)	0.072	0.62	369		0
chr3	19920500	20110500	190	3p24.3	190	S3(2.8)	0.625	0.521	125		0
chrX	22294500	22474500	180	Xp22.11	180	S3(2.8)	0.001	0	0	RP11-40F8.2	0
chrX	1901500	2079500	178	Xp22.33	178	S3(2.8)	0	0	0		0
chr20	6445500	6622500	177	20p12.3	177	S3(2.8)	0.001	0	0		0
chrX	23280500	23448500	168	Xp22.11	168	S3(2.8)	0	0	0	RP11-40F8.2	0
chr1	168942500	169109500	167	1q24.2	167	S3(2.8)	0.157	0.204	76		0
chr19	29318500	29482500	164	19q12	164	S3(2.8)	0.003	0	0		0
chr16	17202500	17366500	164	16p12.3	164	S3(2.8)	0	0	0		0
chr4	106791500	106953500	162	4q24	162	S3(2.8)	0.003	0.105	179		0
chr18	34613500	34761500	148	18q12.2	148	S3(2.8)	0.215	1	415		0
chr6	89796500	89943500	147	6q15	147	S3(2.8)	0.024	0.605	65		0
chr6	19718500	19854500	136	6p22.3	136	S3(2.8)	0.046	0.125	17		0
chr14	57702500	57838500	136	14q22.3	136	S3(2.8)	0.166	0.287	39		0
chrX	65803500	65931500	128	Xq12	128	S3(2.8)	0.001	0	0		0
chr3	67763500	67891500	128	3p14.1	128	S3(2.8)	0.08	1	247		0
chr3	41160500	41286500	126	3p22.1	126	S3(2.8)	1.48	0.365	77		0
chr18	24000500	24125500	125	18q11.2	125	S3(2.8)	0.001	0	0		0
chrX	1779500	1901500	122	Xp22.33	122	S3(2.8)	0	0	0		0
chr9	13232500	13351500	119	9p23	119	S3(2.8)	0.003	0	0		0
chr5	109182500	109298500	116	5q21.3	116	S3(2.8)	0.834	0.5	193		0
chr20	13616500	13727500	111	20p12.1	111	S3(2.8)	0.001	0	0		0
chr3	146990500	147101500	111	3q24	111	S3(2.8)	0.001	0	0		0
chr2	200063500	200167500	104	2q33.1	104	S3(2.8)	0.001	0.01	4		0
chr1	111255500	111359500	104	1p13.3	104	S3(2.8)	0	0	0		0
chr5	136375500	136476500	101	5q31.2	101	S3(2.8)	0.001	0	0	SPOCK1	0
chr16	72704500	72805500	101	16q22.2	101	S3(2.8)	0.059	1	126		0
chr15	98716500	98817500	101	15q26.3	101	S3(2.8)	0	0	0		0
chr6	133500	224500	91	6p25.3	91	S3(2.8)	0	0	0		0
chr12	78033500	78122500	89	12q21.2	89	S3(2.8)	0.347	1	674		0
chr4	90609500	90697500	88	4q22.1	88	S3(2.8)	0	0	0		0
chr10	115299500	115381500	82	10q25.3	82	S3(2.8)	0	0	0		0
chr1	121464500	142559500	21095	1p-q	82	S3(2.8)	0	0	0		0
chr1	231974500	232051500	77	1q42.2	77	S3(2.8)	0.168	1	580		0
chr16	55227500	55303500	76	16q12.2	76	S3(2.8)	0	0	0		0
chr8	43813500	46857500	3044	8p-q	73	S3(2.8)	0	0	0		0
chrX	8575500	8648500	73	Xp22.31	73	S3(2.8)	0	0	0		0
chr5	170437500	170510500	73	5q35.1	73	S3(2.8)	0.189	1	444		0
chr17	9074500	9146500	72	17p13.1	72	S3(2.8)	0.001	0	0		0
chr1	196999500	197070500	71	1q31.3	71	S3(2.8)	0.005	0	0		0
chr16	17134500	17202500	68	16p12.3	68	S3(2.8)	0	0	0		0
chr8	88967500	89033500	66	8q21.3	66	S3(2.8)	0	0	0		0
chr8	136658500	136723500	65	8q24.23	65	S3(2.8)	0.126	0.292	208		0
chr5	93255500	93315500	60	5q15	60	S3(2.8)	0.002	0	0		0
chr17	21197500	21251500	54	17p11.2	54	S3(2.8)	1.164	0.426	33		0
chr4	113662500	113716500	54	4q25	54	S3(2.8)	0.002	0	0		0
chr12	9552500	9603500	51	12p13.31	51	S3(2.8)	0	0	0		0
chr20	29792500	29838500	46	20q11.21	46	S3(2.8)	0.02	0.261	193		0
chr16	72550500	72594500	44	16q22.2	44	S3(2.8)	0.002	0	0		0
chr16	46484500	46485500	1	16q11.2	1	S3(2.8)	0.001	0	0		0
chr6	21889500	23131500	1242	6p22.3	1242	S3(2.9)	0.005	0.15	176	CASC15	0
chr8	92823500	93695500	872	8q21-22	872	S3(2.9)	0.002	0.018	16		0
chr6	9076500	9877500	801	6p24.3	801	S3(2.9)	0.001	0	0	OFCC1	0
chr7	112229500	112953500	724	7q31.1	724	S3(2.9)	0.002	0.018	13		0
chr18	7007500	7692500	685	18p11.23-31	685	S3(2.9)	0.141	0.182	845	PTPRM	0.843			1		1
chr5	106639500	107305500	666	5q21.3	666	S3(2.9)	0.002	0.044	17	FBXL17	0
chr12	100342500	100982500	640	12q23.1	640	S3(2.9)	0.184	0.233	89	ANKS1B	0
chr4	187967500	188603500	636	4q35.2	636	S3(2.9)	0.005	0.052	18		0
chr8	60100500	60690500	590	8q12.1	590	S3(2.9)	0.006	0.068	28		0
chr18	25337500	25906500	569	18q12.1	569	S3(2.9)	0.013	0.12	42		0
chr14	37309500	37805500	496	14q13-21	496	S3(2.9)	0.049	0.294	367		0.139				1	1
chr2	149225500	149706500	481	2q23.1	481	S3(2.9)	0.61	0.518	167		0
chr3	25482500	25937500	455	3p24.2	455	S3(2.9)	0.009	0.059	15		0
chr4	90097500	90549500	452	4q22.1	452	S3(2.9)	0.001	0	0		0
chr5	93315500	93752500	437	5q15	437	S3(2.9)	0.003	0	0		0
chr11	117566500	117972500	406	11q23.3	406	S3(2.9)	0	0	0		0
chr4	129797500	130199500	402	4q28.2	402	S3(2.9)	0.017	0.095	83		0
chr1	72643500	73037500	394	1p31.1	394	S3(2.9)	0.052	0.744	400	NEGR1	0.735	1				1
chr6	28075500	28464500	389	6p22.1	389	S3(2.9)	0.204	0.46	37		0
chr1	61949500	62331500	382	1p31.3	382	S3(2.9)	0.085	0.322	428		0
chr3	24311500	24693500	382	3p24.2	382	S3(2.9)	0.003	0.045	14		0
chr18	6578500	6956500	378	18p11.31	378	S3(2.9)	0	0	0		0
chrX	148464500	148860500	396	Xq28	372	S3(2.9)	0.001	0.025	10		0
chr8	9082500	9441500	359	8p23.1	359	S3(2.9)	0.11	0.081	241		0
chrX	119210500	119606500	396	Xq24	355	S3(2.9)	0.014	0.061	24		0.55			1		1
chr1	111359500	111703500	344	1p13.3	344	S3(2.9)	0.08	0.238	120		0
chr12	100982500	101323500	341	12q23.1	341	S3(2.9)	0.261	0.833	424		0
chr10	52975500	53303500	328	10q21.1	328	S3(2.9)	1.156	1	1046	PRKG1	0.493	1				1
chr1	88157500	88478500	321	1p22.2-3	321	S3(2.9)	0.001	0	0		0
chr4	102889500	103209500	320	4q24	320	S3(2.9)	0.008	0.353	289	BANK1	0
chr20	46900500	47214500	314	20q13.13	314	S3(2.9)	0	0.01	3		0
chr2	18085500	18398500	313	2p24.2	313	S3(2.9)	0.022	0.447	166		0
chr7	86825500	87138500	313	7q21.12	313	S3(2.9)	0.093	0.272	73		0
chrX	38561500	38872500	311	Xp11.4	311	S3(2.9)	0.022	0.029	9		0
chr15	94511500	94822500	311	15q26.2	311	S3(2.9)	0.015	0.158	251		0
chr20	21169500	21478500	309	20p11.22-23	309	S3(2.9)	0.714	0.508	127		0
chr1	195428500	195733500	305	1q31.3	305	S3(2.9)	0.001	0	0		0
chr11	89091500	89390500	299	11q14.3	299	S3(2.9)	0	0	0		0
chr6	28724500	29004500	280	6p22.1	280	S3(2.9)	0.015	0.071	20		0
chr22	22627500	22905500	278	22q11.22	278	S3(2.9)	0.027	0.119	30		0
chr15	88169500	88442500	273	15q25.3	273	S3(2.9)	0	0	0		0
chrX	41592500	41854500	262	Xp11.4	262	S3(2.9)	0.001	0	0		0
chr1	61371500	61630500	259	1p31.3	259	S3(2.9)	0.218	0.34	394	NFIA	0
chr6	71463500	71719500	256	6q13	256	S3(2.9)	0.357	0.441	199		0
chr11	105702500	105950500	248	11q22.3	248	S3(2.9)	0.015	0.012	27		0
chr8	50907500	51145500	238	8q11.21	238	S3(2.9)	0.001	0	0	SNTG1	0
chr1	220365500	220601500	236	1q41	236	S3(2.9)	0.003	0.017	4		0
chr8	39251500	39480500	229	8p11.22	229	S3(2.9)	0.001	0	0		0
chr1	208587500	208810500	223	1q32.2	223	S3(2.9)	0	0	0		0
chr8	116258500	116480500	222	8q23.3	222	S3(2.9)	0.001	0	0		0
chr4	149983500	150203500	220	4q31.23	220	S3(2.9)	0	0	0		0
chr12	101323500	101539500	216	12q23.1	216	S3(2.9)	0.213	0.977	424		0
chr2	21922500	22134500	212	2p24.1	212	S3(2.9)	0	0	0	AC067959.1	0
chrX	34939500	35146500	207	Xp21.1	207	S3(2.9)	0	0	0		0
chr20	58516500	58720500	204	20q13.33	204	S3(2.9)	0.039	0.299	44		0
chr12	131270500	131473500	203	12q24.33	203	S3(2.9)	0.17	0.256	200		0
chr5	65691500	65892500	201	5q12.3	201	S3(2.9)	0.001	0	0	MAST4	0
chrX	30371500	30569500	198	Xp21.2	198	S3(2.9)	0.001	0	0		0
chrX	21424500	21619500	195	Xp22.12	195	S3(2.9)	0.022	0.821	199		0
chr8	15257500	15452500	195	8p22	195	S3(2.9)	0.196	0.333	255		0
chr14	79717500	79912500	195	14q31.1	195	S3(2.9)	0.006	0	0	NRXN3	0
chr11	93122500	93316500	194	11q21	194	S3(2.9)	0.003	0.015	3		0
chr7	39043500	39237500	194	7p14.1	194	S3(2.9)	0.001	0.015	3	POU6F2	0
chr11	115426500	115619500	193	11q23.3	193	S3(2.9)	0	0	0		0
chr4	175053500	175245500	192	4q34.1	192	S3(2.9)	0.071	0.214	103		0
chr8	72453500	72643500	190	8q13.3	190	S3(2.9)	0	0	0		0
chr7	111174500	111362500	188	7q31.1	188	S3(2.9)	0	0	0	IMMP2L	0
chr14	67098500	67284500	186	14q23.3	186	S3(2.9)	0.375	1	682	GPHN	0
chrX	150113500	150295500	182	Xq28	182	S3(2.9)	0.013	0.066	9		0
chr20	59672500	59853500	181	20q13.33	181	S3(2.9)	0.018	0.138	689	CDH4	0
chr13	78678500	78856500	178	13q22.3	178	S3(2.9)	0	0	0	RNF219-AS1	0
chr1	152919500	153097500	178	1q21.3	178	S3(2.9)	0.001	0.034	6		0
chr16	24105500	24282500	177	16p12.1-2	177	S3(2.9)	0	0	0		0
chr13	101196500	101370500	174	13q32.3	174	S3(2.9)	0.003	0.046	464		0
chr16	83347500	83517500	170	16q23.3	170	S3(2.9)	0.597	1	1171	CDH13	0.119		1			1
chr1	116839500	117008500	169	1p13.1	169	S3(2.9)	0.298	0.249	42		0
chr11	32478500	32641500	163	11p13	163	S3(2.9)	0.427	0.227	38		0
chrX	117164500	117326500	162	Xq24	162	S3(2.9)	0	0	0		0
chr13	39784500	39945500	161	13q13.3	161	S3(2.9)	0	0	0		0
chr1	246067500	246228500	161	1q44	161	S3(2.9)	0	0	0	SMYD3	1		1	1		2
chr10	27297500	27456500	159	10p12.1	159	S3(2.9)	0.063	0.088	37		0
chrX	134389500	134543500	154	Xq26.3	154	S3(2.9)	0.052	0.156	24		0
chrX	34558500	34706500	148	Xp21.1	148	S3(2.9)	0.003	0.101	15		0
chr2	34061500	34203500	142	2p22.3	142	S3(2.9)	0	0	0	AC009499.1	0
chrX	128303500	128443500	140	Xq25	140	S3(2.9)	0	0	0		0
chr6	86655500	86794500	139	6q14.3	139	S3(2.9)	0.005	0	0		0
chr19	8890500	9028500	138	19p13.2	138	S3(2.9)	0.001	0.036	5		0
chr6	79287500	79423500	136	6q14.1	136	S3(2.9)	0.001	0	0		0
chr16	49779500	49913500	134	16q12.1	134	S3(2.9)	0	0	0		0
chr7	26085500	26218500	133	7p15.2	133	S3(2.9)	0	0	0		0
chr5	61474500	61607500	133	5q12.1	133	S3(2.9)	0.052	0.045	384		0
chr1	158991500	159124500	133	1q23.1-2	133	S3(2.9)	0.247	0.376	74		0
chr5	175263500	175536500	273	5q35.2	131	S3(2.9)	0	0	0		0
chr3	74736500	74865500	129	3p12.3	129	S3(2.9)	0.002	0	0		0
chr2	76206500	76334500	128	2p12	128	S3(2.9)	0	0	0		0
chr14	39994500	40120500	126	14q21.1	126	S3(2.9)	0.032	1	176		0
chr8	132039500	132164500	125	8q24.22	125	S3(2.9)	0.001	0.056	7		0
chr10	37068500	37190500	122	10p11.21	122	S3(2.9)	0.001	0	0		0
chr11	96607500	96727500	120	11q21	120	S3(2.9)	0.001	0	0		0
chrX	123333500	123450500	117	Xq25	117	S3(2.9)	0	0	0		0
chr4	85952500	86069500	117	4q21.23	117	S3(2.9)	0.006	0.017	68		0
chr20	25880500	25996500	116	20p11.1	116	S3(2.9)	0	0	0		0
chr14	106276500	106389500	113	14q32.33	113	S3(2.9)	0	0	0		0
chr3	40153500	40263500	110	3p22.1	110	S3(2.9)	0.008	0	0		0
chr16	16643500	16751500	108	16p13.11	108	S3(2.9)	0	0	0		0
chr1	148847500	148954500	107	1q21.2	107	S3(2.9)	0.01	0.206	77		0
chr10	117611500	117703500	92	10q25.3	92	S3(2.9)	0.001	0	0	ATRNL1	0
chr6	77980500	78072500	92	6q14.1	92	S3(2.9)	0.001	0	0		0
chr11	48426500	48517500	91	11p11.2	91	S3(2.9)	0	0	0		0
chr18	60499500	60587500	88	18q21.33	88	S3(2.9)	0.462	1	275		0
chr6	152660500	152732500	72	6q25.2	72	S3(2.9)	0.003	0	0	SYNE1	0
chr18	34543500	34613500	70	18q12.2	70	S3(2.9)	0.215	1	415		0
chr4	68508500	68578500	70	4q13.2	70	S3(2.9)	0.088	0.186	147		0
chr20	54575500	54638500	63	20q13.2	63	S3(2.9)	0	0	0		1				1	1
chr10	135455500	135509500	54	10q26.3	54	S3(2.9)	0	0	0		0
chr5	17590500	17640500	50	5p15.1	50	S3(2.9)	0	0	0		0
chr7	120255500	120303500	48	7q31.31	48	S3(2.9)	0.22	1	502		0
chr9	70976500	71013500	37	9q21.11	34	S3(2.9)	0	0	0		0
chr17	25240500	25257500	17	17q11.1	17	S3(2.9)	0	0	0		0
chr20	25755500	25765500	10	20p11.1	10	S3(2.9)	0	0	0		0
chr10	53303500	53311500	8	10q21.1	8	S3(2.9)	1.049	1	1046	PRKG1	0
chrX	8648500	8649500	1	Xp22.31	1	S3(2.9)	0	0	0		0
chrX	12518500	12519500	1	Xp22.2	1	S3(2.9)	0.001	0	0	FRMPD4	0
chr2	180128500	181405500	1277	2q31.2-3	1277	S3(3)	0.001	0.005	7		0
chr3	64703500	65665500	962	3p14.1	962	S3(3)	0.002	0.012	39	MAGI1	0.06				1	1
chr17	69094500	70025500	931	17q24.3	931	S3(3)	0.002	0.008	4		0
chr2	240103500	241030500	927	2q37.3	927	S3(3)	0.001	0.019	14		0
chr11	104394500	105314500	920	11q22.3	920	S3(3)	0.001	0.003	3		0
chr6	101115500	101984500	869	6q16.3	869	S3(3)	0.006	0.029	16	GRIK2	0.777	1	1			2
chr18	26257500	27075500	818	18q12.1	818	S3(3)	0.002	0.039	32		0
chr18	11016500	11792500	776	18p11.21	776	S3(3)	0.001	0.004	3		0
chr10	115381500	116146500	765	10q25.3	765	S3(3)	0.107	0.195	89		0
chr4	109385500	110145500	760	4q25	760	S3(3)	0.161	0.121	57		0
chr3	58811500	59567500	756	3p14.2	756	S3(3)	0.001	0	0		0
chr8	68024500	68766500	742	8q13.2	742	S3(3)	0.082	0.137	147		0
chr15	29054500	29819500	765	15q13.1	738	S3(3)	0	0	0		0
chr8	116602500	117332500	730	8q23.3	730	S3(3)	0.002	0.022	16		0
chr5	124655500	125381500	726	5q23.2	726	S3(3)	0.001	0	0		0
chr9	2180500	2887500	707	9p24.2-3	707	S3(3)	0.049	0.144	214		0.378		1			1
chr14	79912500	80599500	687	14q31.1	687	S3(3)	0.003	0	0	NRXN3	0
chr21	27399500	28079500	680	21q21.3	680	S3(3)	0.011	0.182	124		0
chr5	41085500	41761500	676	5p13.1	676	S3(3)	0.001	0.009	6		0
chr6	137230500	137902500	672	6q23.3	672	S3(3)	0.008	0.018	99		0
chr11	132163500	132823500	660	11q25	660	S3(3)	0.033	0.115	435	NTM,OPCML	0
[truncated: 6,349 more rows]

## Sheet: HF1
												number_of_CNVs
chrom	start	end	size(Kb)	band	HMM_size(Kb)	rep_timing	RPKM	txn_coverage	longest_txn_unit(Kb)	genes(>500Kb)	CNV_coverage	APH	PCR	all
chr5	20120500	30852500	10732	5p13-14	10635	G2(1.3)	0.005	0.03	280	CDH12,CDH18	0
chrX	141264500	147050500	5786	Xq27.2-3	5582	G2(1.3)	0.006	0.009	49		0
chr8	110842500	115897500	5055	8q23.2-3	5055	G2(1.3)	0	0	0	CSMD3	0
chr3	162675500	167434500	4759	3q26.1	4759	G2(1.3)	0	0.001	3		0.026	1		1
chrX	123658500	128163500	4505	Xq25	4505	G2(1.3)	0	0.001	4	TENM1	0
chr9	27598500	32069500	4471	9p21.1-2	4471	G2(1.3)	0.001	0.006	18	LINGO2	0
chr3	82143500	86560500	4417	3p12.1-2	4417	G2(1.3)	0	0	0	CADM2	0
chr13	86395500	90862500	4467	13q31.1-3	4342	G2(1.3)	0.001	0.002	6		0
chr4	90885500	94794500	3909	4q22.1-2	3909	G2(1.3)	0	0	0	CCSER1,GRID2	0
chr2	76472500	79912500	3440	2p12	3440	G2(1.3)	0	0.002	3	CTNNA2,LRRTM4	0
chr5	163273500	166580500	3307	5q34	3307	G2(1.3)	0	0.001	3	CTC-340A15.2	0
chr8	82812500	85909500	3097	8q21.13-2	3097	G2(1.3)	0	0	0	RALYL	0
chrX	31754500	34286500	2532	Xp21.1	2532	G2(1.3)	0	0.001	3	DMD	0
chr7	8458500	10874500	2416	7p21.3	2416	G2(1.3)	0	0.001	3		0
chrX	85388500	94303500	8915	Xq21.2-33	8915	G2(1.4)	0	0	3	DACH2,PCDH11X	0
chr13	53565500	59585500	6020	13q14-21	6020	G2(1.4)	0	0	0		0
chr6	91410500	97263500	5853	6q15-16	5728	G2(1.4)	0.009	0.015	48		0
chr4	61827500	66895500	5068	4q13.1-2	5068	G2(1.4)	0.001	0.01	33	LPHN3	0
chr1	187081500	191919500	4838	1q31.1-2	4838	G2(1.4)	0	0.001	3		0
chr4	42374500	47109500	4735	4p12-13	4735	G2(1.4)	0.007	0.022	70		0
chr9	7737500	12460500	4723	9p23-24	4723	G2(1.4)	0	0.001	3	PTPRD	0
chr13	67875500	72555500	4680	13q21.32-33	4680	G2(1.4)	0	0.001	4		0
chr10	54850500	59363500	4513	10q21.1	4513	G2(1.4)	0	0	0	PCDH15	0
chr3	50500	4353500	4303	3p26.1-3	4303	G2(1.4)	0.012	0.013	46	CNTN4,SUMF1	0
chr2	49144500	53256500	4112	2p16.2-3	4112	G2(1.4)	0	0	0	AC007682.1,NRXN1	0
chr4	178838500	182774500	3936	4q34.3	3936	G2(1.4)	0	0	0		0
chr7	144161500	148003500	3842	7q35-36	3842	G2(1.4)	0	0.001	3	CNTNAP2	0
chr16	60285500	63859500	3574	16q21	3574	G2(1.4)	0	0.001	3		0
chr3	93990500	97557500	3567	3q11.2	3567	G2(1.4)	0.005	0.026	193	EPHA6	0
chrX	25339500	28866500	3527	Xp21.3	3527	G2(1.4)	0.001	0.001	5	IL1RAPL1	0
chr14	46153500	49647500	3494	14q21.2-3	3494	G2(1.4)	0	0	0	LINC00871,MDGA2	0
chr8	2180500	5556500	3376	8p23.2-3	3376	G2(1.4)	0.016	0.077	256	CSMD1	0
chr4	115596500	118832500	3236	4q26	3236	G2(1.4)	0.001	0.002	5		0
chr14	25911500	29053500	3142	14q12	3142	G2(1.4)	0	0.001	3	CTD-3006G17.2	0
chr2	115257500	118255500	2998	2q14.1	2998	G2(1.4)	0	0	0	DPP10	0
chr7	51433500	54394500	2961	7p11-12	2961	G2(1.4)	0	0.003	4		0
chr4	34455500	37384500	2929	4p14-15	2929	G2(1.4)	0	0	0		0
chr5	2197500	5063500	2866	5p15.32-33	2866	G2(1.4)	0.001	0.006	9		0
chrX	80364500	83198500	2834	Xq21.1	2834	G2(1.4)	0.04	0.074	162		0
chr1	104147500	107095500	2948	1p21.1	2808	G2(1.4)	0.001	0.003	4		0
chr4	163102500	165854500	2752	4q32.2-3	2752	G2(1.4)	0.027	0.031	42	2014-03-01	0
chr4	58529500	61195500	2666	4q12-13	2635	G2(1.4)	0	0.001	3		0
chr5	83184500	85816500	2632	5q14.3	2632	G2(1.4)	0	0	0		0
chr4	171114500	173733500	2619	4q33-34	2619	G2(1.4)	0	0	0	GALNTL6	0
chr2	4096500	6772500	2676	2p25.2-3	2610	G2(1.4)	0	0	0		0
chr18	62021500	64620500	2599	18q22.1	2599	G2(1.4)	0	0	0		0
chr4	96142500	98732500	2590	4q22.3	2590	G2(1.4)	0.001	0.002	3	RP11-145G20.1,STPG2	0
chr2	193365500	195844500	2479	2q32.3	2479	G2(1.4)	0	0.001	3		0
chr5	160301500	162753500	2452	5q34	2452	G2(1.4)	0	0	0		0
chr3	5555500	7991500	2436	3p26.1	2436	G2(1.4)	0	0.001	3	GRM7	0
chr11	97973500	100253500	2280	11q22.1	2280	G2(1.4)	0	0	0	CNTN5	0
chr4	130353500	132612500	2259	4q28.2-3	2259	G2(1.4)	0	0	0		0
chr11	79876500	82134500	2258	11q14.1	2258	G2(1.4)	0	0	0	RP11-179A16.1	0
chr10	66100500	68325500	2225	10q21.3	2225	G2(1.4)	0.009	0.111	244	CTNNA3	0
chr7	124610500	126799500	2189	7q31.33	2189	G2(1.4)	0.007	0.084	184	GRM8	0
chr11	20781500	22964500	2183	11p14-15	2183	G2(1.4)	0.001	0.016	36	NELL1	0
chr5	103490500	105583500	2093	5q21.2-3	2093	G2(1.4)	0	0	0	RP11-6N13.1	0
chr18	29936500	32022500	2086	18q12.1	2086	G2(1.4)	0	0.002	4	CCDC178	0
chr6	61867500	63977500	2110	6q11-12	2054	G2(1.4)	0.001	0.001	3	KHDRBS2	0
chr6	164553500	166555500	2002	6q27	2002	G2(1.4)	0	0	0	PDE10A	0
chr2	103435500	105435500	2000	2q12.1	2000	G2(1.4)	0.001	0.013	108		0
chr9	104649500	106647500	1998	9q31.1	1998	G2(1.4)	0	0.002	3		0
chr4	135929500	137790500	1861	4q28.3	1861	G2(1.4)	0.002	0.025	46		0
chr2	139635500	141455500	1820	2q22.1	1820	G2(1.4)	0	0	0	LRP1B	0
chr11	24121500	25926500	1805	11p14.3	1805	G2(1.4)	0	0	0	LUZP2	0
chr6	123071500	124875500	1804	6q22.31	1804	G2(1.4)	0.006	0.015	27	NKAIN2	0
chr11	40387500	42156500	1769	11p12	1769	G2(1.4)	0	0	0	LRRC4C	0
chr18	68645500	70341500	1696	18q22.2-3	1696	G2(1.4)	0	0.002	4		0
chr7	48584500	50279500	1695	7p12.2-3	1695	G2(1.4)	0.001	0.002	3		0
chrX	78088500	79779500	1691	Xq21.1	1691	G2(1.4)	0	0	0		0
chr13	81325500	82999500	1674	13q31.1	1674	G2(1.4)	0.001	0	0		0
chrX	35353500	36948500	1595	Xp21.1	1595	G2(1.4)	0	0	0		0
chr4	160785500	162367500	1582	4q32.1-2	1582	G2(1.4)	0	0.002	3	FSTL5	0
chr3	79583500	81115500	1532	3p12.2-3	1532	G2(1.4)	0	0.002	3	ROBO1	0
chr14	82042500	83573500	1531	14q31.1	1531	G2(1.4)	0	0.002	3		0
chr4	69565500	71094500	1529	4q13.2-3	1529	G2(1.4)	0	0.002	3		0
chr6	98046500	99159500	1113	6q16.1	1113	G2(1.4)	0.001	0	0	RP11-436D23.1	0
chr7	121996500	123024500	1028	7q31.32	1028	G2(1.4)	0	0.003	3	CADPS2	0
chr7	85659500	86471500	812	7q21.11-12	812	G2(1.4)	0	0	0		0
chrX	131889500	132364500	475	Xq26.2	475	G2(1.4)	0	0	0		0
chr16	32255500	32296500	41	16p11.2	40	G2(1.4)	0	0	0		0
chr6	64701500	70435500	5734	6q12-13	5734	S4(1.5)	0	0	0	BAI3,EYS	0
chr4	28748500	33439500	4691	4p15.1	4691	S4(1.5)	0	0.001	6		0
chr9	22701500	26550500	3849	9p21.2-3	3849	S4(1.5)	0	0.001	3		0
chr2	80652500	84402500	3750	2p11-12	3750	S4(1.5)	0	0.001	3	CTNNA2	0
chr21	23057500	26694500	3637	21q21.1-2	3637	S4(1.5)	0	0.001	4		0
chr21	19393500	22706500	3313	21q21.1	3313	S4(1.5)	0.014	0.104	555	NCAM2	0
chr13	61297500	64585500	3288	13q21.2-31	3257	S4(1.5)	0	0	0		0
chrX	110550500	113722500	3172	Xq23	3135	S4(1.5)	0.019	0.035	110		0
chr17	49832500	52935500	3103	17q21-22	3103	S4(1.5)	0	0.003	8	CA10	0
chr7	117401500	120309500	2908	7q31.31	2908	S4(1.5)	0.009	0.009	25		0
chr2	153993500	156858500	2865	2q23-24	2865	S4(1.5)	0.001	0.001	3	GALNT13	0
chr5	98816500	101553500	2737	5q21.1	2704	S4(1.5)	0.01	0.026	67		0
chr8	33690500	36337500	2647	8p12	2647	S4(1.5)	0	0	0	UNC5D	0
chr1	237276500	239603500	2327	1q43	2327	S4(1.5)	0.001	0.02	40	CHRM3,RYR2	0
chr10	82605500	84918500	2313	10q23.1	2313	S4(1.5)	0	0	0	NRG3	0
chr14	42695500	45008500	2313	14q21.1-2	2313	S4(1.5)	0.001	0.001	3		0
chr14	40260500	42545500	2285	14q21.1	2285	S4(1.5)	0.001	0	0		0
chrX	136356500	138620500	2264	Xq26-27	2264	S4(1.5)	0	0.001	3	FGF13	0
chr18	48991500	51229500	2238	18q21.2	2238	S4(1.5)	0	0	0	DCC	0
chr11	38117500	40330500	2213	11p12	2213	S4(1.5)	0	0	0	LRRC4C	0
chr4	10924500	12985500	2061	4p15-16	2061	S4(1.5)	0.001	0.001	3		0
chr13	91425500	93456500	2031	13q31.3	2031	S4(1.5)	0.006	0.014	28	GPC5	0
chr6	49742500	51759500	2017	6p12.3	2017	S4(1.5)	0	0	0		0
chr8	138390500	140353500	1963	8q24.23-3	1963	S4(1.5)	0	0	0		0
chrX	97539500	99479500	1940	Xq21-22	1940	S4(1.5)	0	0	0		0
chr11	89475500	91695500	2220	11q14.3	1890	S4(1.5)	0.001	0.007	8	DISC1FP1	0
chr18	27415500	29296500	1881	18q12.1	1881	S4(1.5)	0.012	0.029	55		0
chr8	64362500	66216500	1854	8q12-13	1854	S4(1.5)	0	0	0	RP11-32K4.1	0
chr5	11408500	13261500	1853	5p15.2	1853	S4(1.5)	0	0	0	CTNND2	0
chr14	97601500	99334500	1733	14q32.2	1733	S4(1.5)	0	0	0		0
chr19	21838500	23566500	1728	19p12	1728	S4(1.5)	0.012	0.099	80		0
chr11	54781500	56508500	1727	11q11-12	1727	S4(1.5)	0	0	0		0
chr7	61960500	64088500	2128	7q11.21	1720	S4(1.5)	0.021	0.037	49		0
chr2	211251500	212949500	1698	2q34	1698	S4(1.5)	0.009	0.124	211	ERBB4	0
chr4	132689500	134406500	1717	4q28.3	1682	S4(1.5)	0.105	0.059	91		0
chr7	87885500	89537500	1652	7q21.12-13	1652	S4(1.5)	0	0	0	ZNF804B	0
chr7	152833500	154547500	1714	7q36.2	1648	S4(1.5)	0	0	0	DPP6	0
chr6	103217500	104845500	1628	6q16.3	1628	S4(1.5)	0	0	0		0
chr12	23102500	24729500	1627	12p12.1	1627	S4(1.5)	0	0	0		0
chr5	18062500	19670500	1608	5p14-15	1608	S4(1.5)	0	0	0	CDH18	0
chr3	180667500	182216500	1549	3q26.33	1549	S4(1.5)	0.054	0.027	88	SOX2-OT	0
chr12	16674500	18203500	1529	12p12.3	1529	S4(1.5)	0.004	0.048	245		0
chr3	102462500	103980500	1518	3q12-13	1518	S4(1.5)	0	0	0		0
chr12	129411500	130912500	1501	12q24.33	1501	S4(1.5)	0	0.002	3	TMEM132D	0
chr2	16111500	17552500	1441	2p24.2-3	1421	S4(1.5)	0	0.003	4		0
chrX	4433500	5839500	1406	Xp22.32	1406	S4(1.5)	0	0	0		0
chr3	75706500	77082500	1376	3p12.3	1376	S4(1.5)	0.005	0.021	25	ROBO2	0
chr7	108423500	109742500	1319	7q31.1	1319	S4(1.5)	0	0	0		0
chr7	56907500	61934500	5027	7p-q	1287	S4(1.5)	0	0	0		0
chr4	104444500	105714500	1270	4q24	1270	S4(1.5)	0	0.003	4		0
chr6	120204500	121457500	1253	6q22.31	1253	S4(1.5)	0.001	0	0		0
chrX	50013500	51263500	1250	Xp11.22	1250	S4(1.5)	0	0	0		0
chr1	49194500	50437500	1243	1p33	1243	S4(1.5)	0	0	0	AGBL4	0
chr18	35384500	36623500	1239	18q12.2	1239	S4(1.5)	0	0	0		0
chr13	107732500	108917500	1185	13q33.3	1185	S4(1.5)	0.029	0.078	61	FAM155A	0
chr12	81810500	82975500	1165	12q21.31	1165	S4(1.5)	0.044	0.115	134	PPFIA2	0
chr3	18601500	19712500	1111	3p24.3	1111	S4(1.5)	0	0	0		0
chr6	114688500	115756500	1068	6q22.1	1068	S4(1.5)	0	0	0	RP3-399L15.3	0
chr18	39914500	40981500	1067	18q12.3	1067	S4(1.5)	0.001	0	0	LINC00907	0
chr10	20043500	21099500	1056	10p12.31	1056	S4(1.5)	0	0	0	C10orf112	0
chr20	21682500	22715500	1033	20p11.21-22	1033	S4(1.5)	0	0	0		0
chr6	162103500	163128500	1025	6q26	1025	S4(1.5)	0	0	0	PARK2	0
chr16	76002500	77024500	1022	16q23.1	1022	S4(1.5)	0	0	0		0
chr2	59457500	60426500	969	2p16.1	969	S4(1.5)	0	0	0	RP11-444A22.1	0
chr8	78212500	79136500	924	8q21.11-12	924	S4(1.5)	0	0.003	3		0
chr18	4281500	5174500	893	18p11.31	893	S4(1.5)	0	0.003	3	DLGAP1	0
chr8	51271500	52152500	881	8q11.21	881	S4(1.5)	0	0	0	SNTG1	0
chr11	49224500	50084500	860	11p11.12	860	S4(1.5)	0	0	0		0
chr12	87129500	87973500	844	12q21.32	844	S4(1.5)	0	0	0	MGAT4C	0
chr9	76335500	77171500	836	9q21.13	836	S4(1.5)	0	0	0		0
chr11	83609500	84425500	816	11q14.1	816	S4(1.5)	0	0	0	DLG2	0
chrX	147088500	147904500	816	Xq27-28	816	S4(1.5)	0	0	0	AFF2	0
chr11	96843500	97655500	812	11q21-22	812	S4(1.5)	0	0	0		0
chrX	130344500	131142500	798	Xq26.1-2	798	S4(1.5)	0	0.004	3		0
chrX	104883500	105645500	762	Xq22.3	762	S4(1.5)	0	0	0	IL1RAPL2	0
chrX	115136500	115918500	782	Xq23	719	S4(1.5)	0	0	0		0
chrX	84319500	85029500	710	Xq21.1-2	710	S4(1.5)	0.023	0.055	101		0
chr2	13659500	14361500	702	2p24.3	702	S4(1.5)	0	0	0	LINC00276	0
chr18	24441500	25104500	663	18q11-12	663	S4(1.5)	0	0	0	AQP4-AS1	0
chr8	86199500	87048500	849	8q21.2-3	604	S4(1.5)	0	0	0		0
chr6	23609500	24164500	555	6p22.3	555	S4(1.5)	0	0.005	3		0
chr12	128717500	129150500	433	12q24.32	433	S4(1.5)	0	0	0		0
chr7	56448500	56870500	422	7p11.2	422	S4(1.5)	0	0.009	4		0
chr2	209478500	209883500	405	2q34	405	S4(1.5)	0	0	0		0
chr9	39073500	47211500	8138	9p11-13	386	S4(1.5)	0	0.005	32		0
chrX	4041500	4409500	368	Xp22.32-33	368	S4(1.5)	0	0	0		0
chr5	116374500	116705500	331	5q23.1	331	S4(1.5)	0	0	0		0
chr2	89895500	90271500	376	2p11.2	255	S4(1.5)	0	0	0		0
chrX	132414500	132580500	166	Xq26.2	166	S4(1.5)	0	0	0		0
chr14	19451500	19634500	183	14q11.2	84	S4(1.5)	0	0	0		0
chr2	123082500	127268500	4186	2q14.3	4186	S4(1.6)	0	0.001	4	CNTNAP5	0
chr7	67279500	71054500	3775	7q11.22	3775	S4(1.6)	0.011	0.029	108	AUTS2,WBSCR17	0
chr5	44205500	50418500	6213	5p-q	3224	S4(1.6)	0.02	0.038	193		0
chr16	5714500	8329500	2615	16p13.2-3	2615	S4(1.6)	0	0	0	RBFOX1,RP11-420N3.2	0
chr1	73492500	75927500	2435	1p31.1	2435	S4(1.6)	0.02	0.085	170		0
chr13	103847500	105913500	2066	13q33.1-2	2066	S4(1.6)	0	0	0		0
chr11	29763500	31532500	1769	11p13-14	1769	S4(1.6)	0.04	0.06	284	DCDC1	0
chr2	34381500	36076500	1695	2p22.3	1695	S4(1.6)	0	0	0	AC009499.1	0
chr12	73358500	74918500	1560	12q21.1	1560	S4(1.6)	0	0	0		0
chr4	167122500	168652500	1530	4q32.3	1530	S4(1.6)	0	0	0	SPOCK3	0
chr3	34442500	35844500	1402	3p22.3	1402	S4(1.6)	0	0	0		0
chr7	11085500	12439500	1354	7p21.3	1354	S4(1.6)	0.067	0.156	245		0
chr3	89225500	93502500	4277	3p-q	1314	S4(1.6)	0	0	0		0
chr10	108749500	110040500	1291	10q25.1	1291	S4(1.6)	0	0	0	SORCS1	0
chr8	13935500	15211500	1276	8p22	1276	S4(1.6)	0	0	0	SGCZ	0
chr16	34027500	35303500	1276	16p11.1-2	1156	S4(1.6)	0	0	0		0
chr20	53243500	54390500	1147	20q13.2	1147	S4(1.6)	0	0	0		0
chr10	130179500	131188500	1009	10q26.2-3	1009	S4(1.6)	0	0	0		0
chr21	31545500	32550500	1005	21q22.11	1005	S4(1.6)	0	0	0		0
chr10	86658500	87657500	999	10q23.1	999	S4(1.6)	0	0	0	GRID1	0
chrX	94353500	95337500	984	Xq21.33	984	S4(1.6)	0	0.003	3		0
chr4	190075500	191058500	983	4q35.2	946	S4(1.6)	0.011	0.041	37		0
chr18	75283500	76228500	945	18q23	926	S4(1.6)	0	0	0		0
chrX	116001500	116924500	923	Xq23-24	923	S4(1.6)	0	0	0		0
chr10	9550500	10468500	918	10p14	918	S4(1.6)	0	0	0		0
chr15	53944500	54839500	895	15q21.3	895	S4(1.6)	0	0	0	UNC13C	0
chr7	37085500	37979500	894	7p14.1-2	894	S4(1.6)	0	0	0	ELMO1	0
chr12	40909500	41789500	880	12q12	880	S4(1.6)	0	0	0		0
chr8	87712500	88582500	870	8q21.3	870	S4(1.6)	0	0	0	CNBD1	0
chr2	137168500	137948500	780	2q22.1	780	S4(1.6)	0	0.005	4	THSD7B	0
chr2	22317500	23070500	753	2p24.1	753	S4(1.6)	0	0	0	AC068490.2	0
chr12	86288500	87025500	737	12q21.31-32	737	S4(1.6)	0	0	0	MGAT4C	0
chr3	191428500	192159500	731	3q28	731	S4(1.6)	0	0	0	FGF12	0
chr3	26118500	26842500	724	3p24.1-2	724	S4(1.6)	0	0	0		0
chr15	23942500	24663500	721	15q11.2	721	S4(1.6)	0	0	0		0
chr12	33364500	34079500	715	12p11.1	715	S4(1.6)	0	0	0		0
chrX	42673500	43386500	713	Xp11.3	713	S4(1.6)	0.001	0	0		0
chr16	32435500	33651500	1216	16p11.2	706	S4(1.6)	0	0	0		0
chr5	62626500	63327500	701	5q12.1-3	701	S4(1.6)	0	0	0		0
chr2	129758500	130449500	691	2q14-21	691	S4(1.6)	0	0	0		0
chrX	139362500	140041500	679	Xq27.1	679	S4(1.6)	0.077	0.068	42		0
chr4	155502500	156171500	669	4q31-32	669	S4(1.6)	0	0	0		0
chr8	137016500	137683500	667	8q24.23	667	S4(1.6)	0	0	0		0
chr10	132608500	133271500	663	10q26.3	663	S4(1.6)	0	0	0		0
chr8	50192500	50853500	661	8q11.21	661	S4(1.6)	0	0	0	SNTG1	0
chr17	21554500	22280500	726	17p11.1-2	661	S4(1.6)	0.002	0.007	5		0
chr7	20665500	21299500	634	7p15-21	634	S4(1.6)	0	0	0		0
chr18	14525500	15300500	775	18p11.21	630	S4(1.6)	0	0	0		0
chr5	105856500	106482500	626	5q21.3	626	S4(1.6)	0	0	0		0
chr4	189105500	189730500	625	4q35.2	625	S4(1.6)	0.001	0.006	4		0
chr1	80685500	81308500	623	1p31.1	623	S4(1.6)	0	0	0		0
chr12	61737500	62339500	602	12q14.1	602	S4(1.6)	0	0	0	FAM19A2	0
chr3	117842500	118441500	599	3q13.32	599	S4(1.6)	0	0	0	RP11-384F7.1	0
chr16	52076500	52673500	597	16q12.1-2	597	S4(1.6)	0	0	0		0
chr10	19214500	19805500	591	10p12.31	591	S4(1.6)	0	0	0	C10orf112	0
chr14	106717500	107305500	588	14q32.33	588	S4(1.6)	0	0	0		0
chr7	96734500	97321500	587	7q21.3	587	S4(1.6)	0.019	0.128	75		0
chr10	25784500	26359500	575	10p12.1	575	S4(1.6)	0	0	0		0
chr3	139759500	140326500	567	3q23	567	S4(1.6)	0	0	0	CLSTN2	0
chr4	149262500	149817500	555	4q31.23	555	S4(1.6)	0	0	0		0
chr12	97778500	98321500	543	12q23.1	543	S4(1.6)	0	0	0		0
chr18	36671500	37204500	533	18q12.2-3	533	S4(1.6)	0	0	0	LINC00669	0
chr7	113064500	113592500	528	7q31.1	528	S4(1.6)	0	0	0		0
chr20	12251500	12768500	517	20p12.1	517	S4(1.6)	0.003	0	0		0
chr4	166401500	166909500	508	4q32.3	508	S4(1.6)	0	0	0		0
chr8	63292500	63798500	506	8q12.3	506	S4(1.6)	0	0.008	4	NKAIN3	0
chr5	51038500	51538500	500	5q11.2	500	S4(1.6)	0	0	0		0
chr1	216793500	217282500	489	1q41	489	S4(1.6)	0	0	0	ESRRG	0
chr3	88308500	88797500	489	3p11.1	489	S4(1.6)	0.001	0.008	4		0
chr4	27606500	28086500	480	4p15.1-2	480	S4(1.6)	0	0	0		0
chrX	107986500	108444500	458	Xq22.3	458	S4(1.6)	0.871	0.009	4		0
chr5	154787500	155263500	476	5q33.2	455	S4(1.6)	0.002	0.008	4		0
chr9	13489500	13942500	453	9p23	453	S4(1.6)	0	0	0		0
chr14	87766500	88210500	444	14q31.3	444	S4(1.6)	0	0	0		0
chr10	132171500	132558500	387	10q26.3	387	S4(1.6)	0.001	0	0		0
chr3	116188500	116558500	370	3q13.31	370	S4(1.6)	0	0	0	LSAMP	0
chr6	102730500	103096500	366	6q16.3	366	S4(1.6)	0	0	0		0
chr21	10361500	10746500	385	21p11.2	363	S4(1.6)	0	0	0		0
chr3	22273500	22624500	351	3p24.3	351	S4(1.6)	0	0	0	ZNF385D	0
chr10	68767500	69110500	343	10q21.3	343	S4(1.6)	0	0	0	CTNNA3	0
chr5	174520500	174846500	326	5q35.2	326	S4(1.6)	0.004	0.064	21		0
chrX	55890500	56177500	287	Xp11.21	287	S4(1.6)	0.159	0.85	167		0
chr2	138216500	138488500	272	2q22.1	272	S4(1.6)	0	0	0	THSD7B	0
chr12	126220500	126491500	271	12q24.32	271	S4(1.6)	0	0	0		0
chr12	99546500	99790500	244	12q23.1	244	S4(1.6)	0	0	0	ANKS1B	0.101	1		1
chr21	14942500	15190500	248	21q11.2	241	S4(1.6)	0	0	0		0
chr9	122229500	122462500	233	9q33.1	233	S4(1.6)	0	0	0		0
chr10	117202500	117424500	222	10q25.3	222	S4(1.6)	0	0	0	ATRNL1	0
chrX	74977500	75182500	205	Xq13.3	205	S4(1.6)	0	0	0		0
chr2	89325500	89831500	506	2p11.2	190	S4(1.6)	0	0	0		0
chr11	115824500	116013500	189	11q23.3	189	S4(1.6)	0	0	0		0
chrX	132615500	132793500	178	Xq26.2	178	S4(1.6)	0	0	0		0
chr18	14314500	14488500	174	18p11.21	174	S4(1.6)	0	0	0		0
chr10	131344500	131515500	171	10q26.3	171	S4(1.6)	0.071	1	303		0
chr3	145100500	145266500	166	3q24	166	S4(1.6)	0	0	0		0
chr1	166534500	166694500	160	1q24.1	160	S4(1.6)	0	0	0		0
chr8	47375500	47529500	154	8q11.1	154	S4(1.6)	0	0	0		0
chr12	61571500	61696500	125	12q14.1	125	S4(1.6)	0	0	0		0
chr3	22132500	22242500	110	3p24.3	110	S4(1.6)	0	0	0	ZNF385D	0
chr6	167693500	167794500	101	6q27	101	S4(1.6)	0	0	0		0
chr14	84511500	84611500	100	14q31.2	100	S4(1.6)	0	0	0		0
chr21	14765500	14865500	100	21q11.2	100	S4(1.6)	0	0	0		0
chrX	5882500	5981500	99	Xp22.32	99	S4(1.6)	0	0	0		0
chr4	158591500	158690500	99	4q32.1	99	S4(1.6)	0	0	0		0
chr6	27785500	27881500	96	6p22.1	96	S4(1.6)	0.142	0.667	65		0
chr20	29420500	29514500	94	20q11.21	94	S4(1.6)	0	0	0		0
chr6	18953500	19042500	89	6p22.3	89	S4(1.6)	0	0	0		0
chrX	110425500	110498500	73	Xq23	73	S4(1.6)	0	0	0		0
chr5	50449500	50516500	67	5q11.1	67	S4(1.6)	0	0	0		0
chr9	68301500	68368500	67	9q13	67	S4(1.6)	0	0	0		0
chr8	21094500	21153500	59	8p21.3	59	S4(1.6)	0	0	0		0
chr6	167949500	168031500	82	6q27	20	S4(1.6)	0	0	0		0
chr12	34780500	39652500	4872	12p-q	1888	S4(1.7)	0	0.003	13		0
chr18	37697500	39147500	1450	18q12.3	1450	S4(1.7)	0	0	0		0
chr8	75953500	77066500	1113	8q21.11	1113	S4(1.7)	0.001	0.005	3		0
chr15	86722500	87818500	1096	15q25.3	1096	S4(1.7)	0	0	0	AGBL1	0
chr3	59988500	61069500	1081	3p14.2	1081	S4(1.7)	0	0	0	FHIT	0
chr11	42187500	43243500	1056	11p12	1056	S4(1.7)	0	0	0		0
chr10	106800500	107771500	971	10q25.1	971	S4(1.7)	0	0	0	SORCS3	0
chr9	120814500	121716500	902	9q33.1	902	S4(1.7)	0	0	0		0
chr2	184433500	185277500	844	2q32.1	844	S4(1.7)	0	0	0		0
chr3	179723500	180534500	811	3q26.33	811	S4(1.7)	0.048	0.055	41		0
chr1	247732500	248540500	808	1q44	808	S4(1.7)	0	0	0		0
chr16	78147500	78947500	800	16q23.1	800	S4(1.7)	0.045	0.988	568	WWOX	0.106	1		1
chr1	102235500	102959500	724	1p21.1	724	S4(1.7)	0	0.004	3		0
chr1	4831500	5506500	675	1p36.31-32	675	S4(1.7)	0.02	0.037	142		0
chr9	82850500	83523500	673	9q21.31	673	S4(1.7)	0	0	0		0
chr11	50126500	50771500	645	11p11.12	645	S4(1.7)	0	0.005	3		0
chr1	71975500	72601500	626	1p31.1	626	S4(1.7)	0	0	0	NEGR1	0.541	4		4
chr5	128472500	129084500	612	5q23.3	612	S4(1.7)	0.001	0	0		0
chr21	41545500	42151500	606	21q22.2	606	S4(1.7)	0	0	0	DSCAM	0
chr20	40943500	41545500	602	20q12	602	S4(1.7)	0	0	0	PTPRT	0
chr15	24699500	25298500	599	15q11.2	599	S4(1.7)	0.071	0.17	196		0
chr8	109393500	109968500	575	8q23.1	575	S4(1.7)	0.08	0.153	88		0
chr5	88956500	89484500	528	5q14.3	528	S4(1.7)	0	0	0		0
chrX	96130500	96644500	514	Xq21.33	514	S4(1.7)	0.503	1	936	DIAPH2	0.156	2		2
chr3	68065500	68572500	507	3p14.1	507	S4(1.7)	0.002	0.008	4	FAM19A1	0
chr2	163521500	164024500	503	2q24.2-3	503	S4(1.7)	0	0	0		0
chr10	8622500	9095500	473	10p14	473	S4(1.7)	0	0	0		0
chr8	55785500	56256500	471	8q12.1	471	S4(1.7)	0	0	0		0
chr12	20915500	21375500	460	12p12.1-2	460	S4(1.7)	0.001	0	0		0
chr15	97651500	98064500	413	15q26.2	413	S4(1.7)	0	0	0		0
chr5	152000500	152403500	403	5q33.1	403	S4(1.7)	0	0	0	AC091969.1	0
chr15	47039500	47439500	400	15q21.1	400	S4(1.7)	0	0	0		0
chr15	53522500	53919500	397	15q21.3	397	S4(1.7)	0	0	0		0
chr15	26672500	27067500	395	15q12	395	S4(1.7)	0.001	0.008	3		0
chr4	67661500	68056500	395	4q13.2	395	S4(1.7)	0.001	0	0		0
chr17	68549500	68943500	394	17q24.3	394	S4(1.7)	0	0.008	3		0
chr7	96212500	96606500	394	7q21.3	394	S4(1.7)	0	0	0		0
chr10	113280500	113653500	373	10q25.2	373	S4(1.7)	0	0	0		0
chr10	23866500	24238500	372	10p12.2	372	S4(1.7)	0	0	0	KIAA1217	0
chr16	25989500	26359500	370	16p12.1	370	S4(1.7)	0	0	0		0
chr20	6784500	7145500	361	20p12.3	361	S4(1.7)	0	0	0		0
chr2	186308500	186651500	343	2q32.1	343	S4(1.7)	0	0	0		0
chr11	4660500	4995500	335	11p15.4	335	S4(1.7)	0	0	0		0
chr14	19798500	20437500	639	14q11.2	334	S4(1.7)	0	0.005	3		0
chrX	75863500	76194500	331	Xq13-21	331	S4(1.7)	0.001	0	0		0
chr12	83088500	83415500	327	12q21.31	327	S4(1.7)	0.089	1	454		0
chr5	5677500	6002500	325	5p15.32	325	S4(1.7)	0	0	0		0
chr11	37014500	37337500	323	11p12	323	S4(1.7)	0	0	0		0
chr1	14343500	14663500	320	1p36.21	320	S4(1.7)	0.007	0	0		0
chr5	87061500	87364500	303	5q14.3	303	S4(1.7)	0	0	0		0
chr9	121849500	122148500	299	9q33.1	299	S4(1.7)	0	0	0		0
chr11	133264500	133558500	294	11q25	294	S4(1.7)	0	0	0	OPCML	0
chr4	23199500	23493500	294	4p15.2	294	S4(1.7)	0	0	0		0
chr13	22970500	23263500	293	13q12.11	293	S4(1.7)	0	0	0		0
chr11	50794500	51467500	673	11p11.12	292	S4(1.7)	0	0	0		0
chr22	16066500	16982500	916	22q11.1	290	S4(1.7)	0	0	0		0
chr21	9398500	9719500	321	21p11.2	285	S4(1.7)	0.002	0.05	13		0
chrX	147934500	148188500	254	Xq28	254	S4(1.7)	0	0	0	AFF2	0
chr19	24381500	24623500	242	19p11-12	242	S4(1.7)	0	0	0		0
chr10	2299500	2519500	220	10p15.3	220	S4(1.7)	0	0	0		0
chr15	94152500	94370500	218	15q26.1-2	218	S4(1.7)	0	0	0		0
chr18	58508500	58722500	214	18q21.32	214	S4(1.7)	0	0	0		0
chr15	27343500	27554500	211	15q12	211	S4(1.7)	0	0	0	GABRG3	0
chr9	108817500	109026500	209	9q31.2	209	S4(1.7)	0.006	0	0		0
chr13	109006500	109215500	209	13q33.3	209	S4(1.7)	0	0	0		0
chr18	13936500	14145500	209	18p11.21	209	S4(1.7)	0	0	0		0
chr12	99832500	100038500	206	12q23.1	206	S4(1.7)	0	0	0	ANKS1B	1	3		3
chr14	85139500	85336500	197	14q31.3	197	S4(1.7)	0	0	0		0
chr12	61129500	61324500	195	12q14.1	195	S4(1.7)	0	0	0		0
chr1	142932500	143305500	373	1q21.1	194	S4(1.7)	0.027	0.871	325		0
chr17	11224500	11417500	193	17p12	193	S4(1.7)	0	0	0		0
chr14	84657500	84843500	186	14q31.2	186	S4(1.7)	0	0	0		0
chr5	17827500	18006500	179	5p15.1	179	S4(1.7)	0	0	0		0
chrX	8106500	8285500	179	Xp22.31	179	S4(1.7)	0.03	1	439		0
chr7	3662500	3841500	179	7p22.2	179	S4(1.7)	0	0	0	SDK1	0
chr13	106025500	106203500	178	13q33.2	178	S4(1.7)	0	0	0		0
chr2	371500	544500	173	2p25.3	173	S4(1.7)	0	0	0		0
chr2	236650500	236821500	171	2q37.2	171	S4(1.7)	0.603	1	674	AGAP1	0
chr5	155942500	156111500	169	5q33.3	169	S4(1.7)	0.419	1	456	SGCD	0
chr9	1412500	1578500	166	9p24.3	166	S4(1.7)	0	0	0		0
chr15	27604500	27767500	163	15q12	163	S4(1.7)	0	0	0	GABRG3	0
chr18	6168500	6329500	161	18p11.31	161	S4(1.7)	0	0	0		0
chr13	96938500	97098500	160	13q32.1	160	S4(1.7)	0	0	0	HS6ST3	0
chr6	167794500	167949500	155	6q27	155	S4(1.7)	0	0	0		0
chr13	97156500	97310500	154	13q32.1	154	S4(1.7)	0	0	0	HS6ST3	0
chr15	46835500	46986500	151	15q21.1	151	S4(1.7)	0.002	0	0		0
chr13	22726500	22875500	149	13q12.11	149	S4(1.7)	0	0	0		0
chr4	158412500	158561500	149	4q32.1	149	S4(1.7)	0	0	0		0
chr6	168844500	168991500	147	6q27	147	S4(1.7)	0	0	0		0
chr5	7526500	7671500	145	5p15.31	145	S4(1.7)	0	0	0		0
chr5	87484500	87627500	143	5q14.3	143	S4(1.7)	0.19	0.448	172		0
chrX	6017500	6160500	143	Xp22.31	143	S4(1.7)	0	0	0		0
chr2	24500	167500	143	2p25.3	143	S4(1.7)	0	0	0		0
chrX	57186500	57326500	140	Xp11.21	140	S4(1.7)	0.072	0.779	149		0
chr7	95382500	95518500	136	7q21.3	136	S4(1.7)	0.005	0	0		0
chr17	11043500	11179500	136	17p12	136	S4(1.7)	0	0	0		0
chr14	83649500	83777500	128	14q31.2	128	S4(1.7)	0	0	0		0
chr17	10871500	10993500	122	17p12	122	S4(1.7)	0	0	0		0
chr10	122831500	122953500	122	10q26.12	122	S4(1.7)	0	0	0		0
chr1	166395500	166513500	118	1q24.1	118	S4(1.7)	0	0	0		0
chrX	57345500	57462500	117	Xp11.21	117	S4(1.7)	0.01	0	0		0
chr4	21303500	21419500	116	4p15.2	116	S4(1.7)	0	0	0	KCNIP4	0
chr12	61352500	61467500	115	12q14.1	115	S4(1.7)	0	0	0		0
chr21	10880500	10988500	108	21p11.1-2	108	S4(1.7)	0	0	0		0
chr16	32329500	32435500	106	16p11.2	106	S4(1.7)	0	0	0		0
chr2	132650500	132755500	105	2q21.2	105	S4(1.7)	0	0	0		0
chr15	27194500	27297500	103	15q12	103	S4(1.7)	0	0	0	GABRG3	0
chrX	83942500	84043500	101	Xq21.1	101	S4(1.7)	0.001	0.03	3		0
chr9	7639500	7737500	98	9p24.1	98	S4(1.7)	0	0	0		0
chr8	54003500	54100500	97	8q11.23	97	S4(1.7)	0	0	0		0
chr14	86593500	86684500	91	14q31.3	91	S4(1.7)	0	0	0		0
chr15	20525500	20611500	86	15q11.1	86	S4(1.7)	0	0	0		0
chr2	41576500	41661500	85	2p22.1	85	S4(1.7)	0	0	0		0
chrX	132873500	132957500	84	Xq26.2	84	S4(1.7)	0	0	0		0
chr5	129405500	129486500	81	5q23.3	81	S4(1.7)	0.02	1	255		0
chr6	19088500	19168500	80	6p22.3	80	S4(1.7)	0.001	0.038	3		0
chr6	122856500	122935500	79	6q22.31	79	S4(1.7)	0.004	0	0		0
chr1	48534500	48612500	78	1p33	78	S4(1.7)	0	0	0		0
chr7	71054500	71131500	77	7q11.22	77	S4(1.7)	0	0	0	WBSCR17	0
chrX	55537500	55613500	76	Xp11.21	76	S4(1.7)	0	0	0		0
chr2	15987500	16062500	75	2p24.3	75	S4(1.7)	0	0	0		0
chr1	48753500	48828500	75	1p33	75	S4(1.7)	0	0	0		0
chr4	176586500	176658500	72	4q34.2	72	S4(1.7)	0	0	0		0
chr5	87666500	87737500	71	5q14.3	71	S4(1.7)	0.032	0.972	172		0
chr2	95340500	95410500	70	2q11.1	70	S4(1.7)	0	0	0		0
chr19	20460500	20598500	138	19p12	70	S4(1.7)	0	0	0		0
chr1	176470500	176538500	68	1q25.2	68	S4(1.7)	0.001	0	0		0
chr6	153982500	154050500	68	6q25.2	68	S4(1.7)	0	0	0		0
chrX	51337500	51405500	68	Xp11.22	68	S4(1.7)	0	0	0		0
chrX	63729500	63795500	66	Xq11.2	66	S4(1.7)	0	0	0		0
chr2	2425500	2490500	65	2p25.3	65	S4(1.7)	0	0	0		0
chr7	13334500	13398500	64	7p21.3	64	S4(1.7)	0	0	0	AC011288.2	0
chr14	106597500	106661500	64	14q32.33	64	S4(1.7)	0	0	0		0
chrX	49778500	49841500	63	Xp11.22-23	63	S4(1.7)	0.134	1	186		0
chr14	78814500	78877500	63	14q24.3	63	S4(1.7)	0	0	0	NRXN3	0
chr6	70790500	70851500	61	6q13	61	S4(1.7)	0	0	0		0
chr20	51316500	51375500	59	20q13.2	59	S4(1.7)	0	0	0		0
chr4	23543500	23602500	59	4p15.2	59	S4(1.7)	0	0	0		0
chr4	155388500	155446500	58	4q31.3	58	S4(1.7)	0	0	0		0
chr12	129243500	129301500	58	12q24.32-33	58	S4(1.7)	0.002	0	0		0
chr12	103466500	103523500	57	12q23.2	57	S4(1.7)	0	0	0		0
chr8	136931500	136988500	57	8q24.23	57	S4(1.7)	0	0	0		0
chr4	155446500	155502500	56	4q31.3	56	S4(1.7)	0.001	0	0		0
chr10	2141500	2197500	56	10p15.3	56	S4(1.7)	0	0	0		0
chr8	47597500	47653500	56	8q11.1	56	S4(1.7)	0	0	0		0
chr1	217348500	217404500	56	1q41	56	S4(1.7)	0	0	0		0
chr14	106661500	106717500	56	14q32.33	56	S4(1.7)	0	0	0		0
chr16	26449500	26504500	55	16p12.1	55	S4(1.7)	0	0	0		0
chrX	131780500	131832500	52	Xq26.2	52	S4(1.7)	0	0	0		0
chr13	79417500	79469500	52	13q31.1	52	S4(1.7)	0.001	0.077	4		0
chr6	122977500	123029500	52	6q22.31	52	S4(1.7)	0.001	0	0		0
chr3	144979500	145030500	51	3q24	51	S4(1.7)	0	0	0		0
chr10	118142500	118193500	51	10q25.3	51	S4(1.7)	0	0	0		0
chr12	14205500	14255500	50	12p13.1	50	S4(1.7)	0	0	0		0
chr15	94037500	94087500	50	15q26.1	50	S4(1.7)	0	0	0		0
chr4	23493500	23543500	50	4p15.2	50	S4(1.7)	0	0	0		0
chr10	38978500	39027500	49	10p11.1	49	S4(1.7)	0	0	0		0
chrX	51709500	51758500	49	Xp11.22	49	S4(1.7)	0	0	0		0
chr2	16062500	16111500	49	2p24.3	49	S4(1.7)	0	0	0		0
chr21	14716500	14765500	49	21q11.2	49	S4(1.7)	0	0	0		0
chr15	54978500	55027500	49	15q21.3	49	S4(1.7)	0	0	0		0
chr8	47179500	47227500	48	8q11.1	48	S4(1.7)	0	0	0		0
chr7	3873500	3920500	47	7p22.2	47	S4(1.7)	0	0	0	SDK1	0
chrX	139285500	139331500	46	Xq27.1	46	S4(1.7)	0	0	0		0
chr14	84611500	84657500	46	14q31.2	46	S4(1.7)	0	0	0		0
chr1	69376500	69420500	44	1p31.2	44	S4(1.7)	0	0	0		0
chr2	250500	294500	44	2p25.3	44	S4(1.7)	0.827	0.545	23		0
chrX	51865500	51908500	43	Xp11.22	43	S4(1.7)	0	0	0		0
chr21	15470500	15513500	43	21q11.2	43	S4(1.7)	0.2	1	141		0
chr12	14025500	14068500	43	12p13.1	43	S4(1.7)	0	0	0		0
chrX	150623500	150663500	40	Xq28	40	S4(1.7)	0.008	0	0		0
chr9	120014500	120052500	38	9q33.1	38	S4(1.7)	0	0	0	ASTN2	0
chr21	15560500	15597500	37	21q11.2	37	S4(1.7)	0.002	0	0		0
chr10	39027500	39058500	31	10p11.1	31	S4(1.7)	0.001	0	0		0
chr12	61324500	61352500	28	12q14.1	28	S4(1.7)	0	0	0		0
chrX	4409500	4433500	24	Xp22.32	24	S4(1.7)	0	0	0		0
chr10	36487500	38003500	1516	10p11.1-21	1516	S4(1.8)	0	0.002	3		0
chr13	84554500	85677500	1123	13q31.1	1123	S4(1.8)	0.001	0	0		0
chr6	57313500	58074500	761	6p11.2	761	S4(1.8)	0.413	0.301	225		0
chrX	61671500	62240500	569	Xq11.1	569	S4(1.8)	0	0.007	4		0
chr11	48649500	49194500	545	11p11.12-2	545	S4(1.8)	0	0.013	4		0
chr19	27852500	28376500	524	19q11	524	S4(1.8)	0.038	0.185	110		0
chr7	123588500	124098500	510	7q31.32-33	510	S4(1.8)	0	0	0		0
chr19	23631500	24107500	476	19p12	476	S4(1.8)	0.022	0.063	46		0
chr6	78468500	78943500	475	6q14.1	475	S4(1.8)	0	0	0		0
chr7	71131500	71543500	412	7q11.22	412	S4(1.8)	0	0	0	CALN1,WBSCR17	0
chr8	110073500	110470500	397	8q23.1	397	S4(1.8)	0.05	0.035	14		0
chr7	14267500	14640500	373	7p21.2	373	S4(1.8)	0	0	0	DGKB	0
chr6	87042500	87413500	371	6q14.3	371	S4(1.8)	0	0	0		0
chr5	7161500	7526500	365	5p15.31	365	S4(1.8)	0	0	0		0
chr2	148768500	149125500	357	2q23.1	357	S4(1.8)	0.813	0.975	520		0.196	1		1
chr11	79497500	79835500	338	11q14.1	338	S4(1.8)	0.001	0.012	4		0
chr8	73211500	73537500	326	8q13.3	326	S4(1.8)	0	0	0		0
chr22	33848500	34158500	310	22q12.3	310	S4(1.8)	0	0	0	LARGE	0.23	1		1
chr3	168055500	168322500	267	3q26.2	267	S4(1.8)	0.002	0	0	EGFEM1P	0
chrX	74668500	74928500	260	Xq13.3	260	S4(1.8)	0.001	0.015	4		0
chr12	40127500	40384500	257	12q12	257	S4(1.8)	0	0	0		0
chr20	7187500	7429500	242	20p12.3	242	S4(1.8)	0	0	0		0
chr2	15346500	15555500	209	2p24.3	209	S4(1.8)	0.001	0	0		0
chr13	78280500	78486500	206	13q22.3	206	S4(1.8)	0	0	0		0
chr9	87633500	87838500	205	9q21.33	205	S4(1.8)	0	0	0		0
chr8	15448500	15652500	204	8p22	204	S4(1.8)	0.597	1	262		0
chr7	3431500	3622500	191	7p22.2	191	S4(1.8)	0	0	0	SDK1	0
chr2	41294500	41480500	186	2p22.1	186	S4(1.8)	0	0	0		0
chr8	20909500	21094500	185	8p21.3	185	S4(1.8)	0	0	0		0
chr4	187082500	187263500	181	4q35.1-2	181	S4(1.8)	0.044	0.138	25		0
chr5	129603500	129783500	180	5q23.3	180	S4(1.8)	0	0	0		0
chr11	84666500	84845500	179	11q14.1	179	S4(1.8)	0	0	0	DLG2	0
chr2	148168500	148347500	179	2q22.3	179	S4(1.8)	0	0	0		0
chr2	107924500	108103500	179	2q12.3	179	S4(1.8)	0	0	0		0
chr15	22315500	22490500	175	15q11.2	175	S4(1.8)	0	0	0		0
chrX	68863500	69036500	173	Xq13.1	173	S4(1.8)	0.002	0	0		0
chr5	42376500	42544500	168	5p12-13	168	S4(1.8)	0.029	0.726	300		0
chr2	212996500	213163500	167	2q34	167	S4(1.8)	0	0	0	ERBB4	0
chr10	42599500	42757500	158	10q11.21	158	S4(1.8)	0	0	0		0
chr5	42101500	42252500	151	5p13.1	151	S4(1.8)	0.001	0	0		0
chr10	1952500	2102500	150	10p15.3	150	S4(1.8)	0	0	0		0
chr8	47227500	47375500	148	8q11.1	148	S4(1.8)	0	0	0		0
chr5	62252500	62397500	145	5q12.1	145	S4(1.8)	0	0	0		0
chrX	56335500	56479500	144	Xp11.21	144	S4(1.8)	0.013	0.076	88		0
chr14	19070500	19451500	381	14q11.1-2	144	S4(1.8)	0	0	0		0
chr17	11457500	11600500	143	17p12	143	S4(1.8)	0	0	0		0
chr10	85604500	85744500	140	10q23.1	140	S4(1.8)	0	0	0		0
chr15	54839500	54978500	139	15q21.3	139	S4(1.8)	0	0	0	UNC13C	0
chr1	76703500	76839500	136	1p31.1	136	S4(1.8)	0.004	0	0	ST6GALNAC3	0
chrX	28908500	29044500	136	Xp21.3	136	S4(1.8)	0.005	0	0	IL1RAPL1	0
chr1	82670500	82805500	135	1p31.1	135	S4(1.8)	0	0	0		0
chr11	59931500	60065500	134	11q12.2	134	S4(1.8)	0	0	0		0
chr20	16374500	16504500	130	20p12.1	130	S4(1.8)	0	0	0		0
chr8	31368500	31497500	129	8p12	129	S4(1.8)	0	0	0	NRG1	0
chr7	96606500	96734500	128	7q21.3	128	S4(1.8)	0	0	0		0
chr9	78204500	78331500	127	9q21.13	127	S4(1.8)	0	0	0		0
chr7	13440500	13567500	127	7p21.3	127	S4(1.8)	0.001	0	0	AC011288.2	0
chr9	14866500	14993500	127	9p22.3	127	S4(1.8)	0	0	0		0
chr15	27067500	27194500	127	15q12	127	S4(1.8)	0.001	0	0		0
chr2	186182500	186308500	126	2q32.1	126	S4(1.8)	0	0	0		0
chr5	42252500	42376500	124	5p13.1	124	S4(1.8)	0	0	0		0
chr2	147905500	148025500	120	2q22.3	120	S4(1.8)	0	0	0		0
chr6	154112500	154229500	117	6q25.2	117	S4(1.8)	0	0	0		0
chr10	38003500	38117500	114	10p11.1	114	S4(1.8)	0	0	0		0
chr10	38117500	38229500	112	10p11.1	112	S4(1.8)	0.006	0.098	11		0
chr12	129301500	129411500	110	12q24.33	110	S4(1.8)	0.019	0.1	11		0
chr1	96270500	96380500	110	1p21.3	110	S4(1.8)	0	0	0		0
chr18	5287500	5397500	110	18p11.31	110	S4(1.8)	0.001	0	0		0
chr10	38861500	38978500	117	10p11.1	109	S4(1.8)	0.001	0	0		0
chr11	37887500	37993500	106	11p12	106	S4(1.8)	0	0	0		0
chr3	139654500	139759500	105	3q23	105	S4(1.8)	0	0	0	CLSTN2	0
chr12	33211500	33315500	104	12p11.1-21	104	S4(1.8)	0	0	0		0
chr12	61467500	61571500	104	12q14.1	104	S4(1.8)	0	0	0		0
chr10	2197500	2299500	102	10p15.3	102	S4(1.8)	0	0	0		0
chr1	82805500	82906500	101	1p31.1	101	S4(1.8)	0	0	0		0
chr5	62397500	62495500	98	5q12.1	98	S4(1.8)	0	0	0		0
chr8	132348500	132446500	98	8q24.22	98	S4(1.8)	0	0	0		0
chr18	58411500	58508500	97	18q21.32	97	S4(1.8)	0	0	0		0
chr13	22875500	22970500	95	13q12.11	95	S4(1.8)	0	0	0		0
chr2	23108500	23202500	94	2p24.1	94	S4(1.8)	0	0	0		0
chr12	129150500	129243500	93	12q24.32	93	S4(1.8)	0	0	0		0
chr15	55079500	55172500	93	15q21.3	93	S4(1.8)	0	0	0		0
chr7	21299500	21392500	93	7p15.3	93	S4(1.8)	0	0	0		0
chr4	165854500	165947500	93	4q32.3	93	S4(1.8)	0.004	0.032	3		0
chr8	55640500	55732500	92	8q12.1	92	S4(1.8)	0	0	0		0
chr18	5719500	5810500	91	18p11.31	91	S4(1.8)	0	0	0		0
chr16	26359500	26449500	90	16p12.1	90	S4(1.8)	0	0	0		0
chrX	75736500	75826500	90	Xq13.3	90	S4(1.8)	0.006	0	0		0
chr9	92903500	92993500	90	9q22.2	90	S4(1.8)	0.001	0	0		0
chr4	28603500	28693500	90	4p15.1	90	S4(1.8)	0.001	0	0		0
chr19	20644500	20733500	89	19p12	89	S4(1.8)	0	0	0		0
chr18	76308500	76396500	88	18q23	88	S4(1.8)	0.001	0	0		0
chr2	6772500	6858500	86	2p25.2	86	S4(1.8)	0	0	0		0
chr2	143157500	143241500	84	2q22.2	84	S4(1.8)	0	0	0		0
chr12	74971500	75055500	84	12q21.1	84	S4(1.8)	0	0	0		0
chr2	167500	250500	83	2p25.3	83	S4(1.8)	0	0	0		0
chr9	87928500	88011500	83	9q21.33	83	S4(1.8)	0	0	0		0
chr12	34567500	34650500	83	12p11.1	83	S4(1.8)	0	0	0		0
chr1	82588500	82670500	82	1p31.1	82	S4(1.8)	0	0	0		0
chr10	113199500	113280500	81	10q25.2	81	S4(1.8)	0	0	0		0
chr9	122148500	122229500	81	9q33.1	81	S4(1.8)	0	0	0		0
chrX	132793500	132873500	80	Xq26.2	80	S4(1.8)	0	0	0		0
chr3	162558500	162638500	80	3q26.1	80	S4(1.8)	0	0	0		0
chr18	76228500	76308500	80	18q23	80	S4(1.8)	0	0	0		0
chr14	84433500	84511500	78	14q31.2	78	S4(1.8)	0	0	0		0
chr15	97524500	97601500	77	15q26.2	77	S4(1.8)	0	0	0		0
chr20	38683500	38759500	76	20q12	76	S4(1.8)	0	0	0		0
chr1	73416500	73492500	76	1p31.1	76	S4(1.8)	0	0	0		0
chr5	98674500	98749500	75	5q21.1	75	S4(1.8)	0	0	0		0
chr21	14865500	14942500	77	21q11.2	75	S4(1.8)	0	0	0		0
chr2	13535500	13610500	75	2p24.3	75	S4(1.8)	0	0	0		0
chr9	7566500	7639500	73	9p24.1	73	S4(1.8)	0	0	0		0
chr5	6062500	6134500	72	5p15.32	72	S4(1.8)	0	0	0		0
chr5	129264500	129336500	72	5q23.3	72	S4(1.8)	0.02	1	255		0
chr15	97454500	97524500	70	15q26.2	70	S4(1.8)	0	0	0		0
chrX	104143500	104213500	70	Xq22.3	70	S4(1.8)	0	0	0	IL1RAPL2	0
chr3	145030500	145100500	70	3q24	70	S4(1.8)	0	0	0		0
chr2	132795500	132864500	69	2q21.2	69	S4(1.8)	0	0	0		0
chr5	129336500	129405500	69	5q23.3	69	S4(1.8)	0.02	1	255		0
chr11	133196500	133264500	68	11q25	68	S4(1.8)	0	0	0	OPCML	0
chr10	129051500	129119500	68	10q26.2	68	S4(1.8)	1.122	1	670	DOCK1	0
chr5	98749500	98816500	67	5q21.1	67	S4(1.8)	0	0	0		0
chr18	14247500	14314500	67	18p11.21	67	S4(1.8)	0	0	0		0
chr5	144192500	144258500	66	5q31.3	66	S4(1.8)	0.001	0	0		0
chr1	217282500	217348500	66	1q41	66	S4(1.8)	0	0	0	ESRRG	0
chr12	45017500	45083500	66	12q12	66	S4(1.8)	0	0	0		0
chrX	21165500	21231500	66	Xp22.12	66	S4(1.8)	0	0	0		0
chr15	94087500	94152500	65	15q26.1	65	S4(1.8)	0	0	0		0
chrX	20992500	21057500	65	Xp22.12	65	S4(1.8)	0	0	0		0
chr10	38671500	38747500	76	10p11.1	65	S4(1.8)	0.007	0.132	39		0
chr8	20728500	20792500	64	8p21.3	64	S4(1.8)	0	0	0		0
chr16	33725500	33847500	122	16p11.2	64	S4(1.8)	0	0	0		0
chr8	20845500	20909500	64	8p21.3	64	S4(1.8)	0	0	0		0
chr5	62495500	62558500	63	5q12.1	63	S4(1.8)	0	0	0		0
chr6	154050500	154112500	62	6q25.2	62	S4(1.8)	0	0	0		0
chrX	83854500	83916500	62	Xq21.1	62	S4(1.8)	0	0	0		0
chr19	57045500	57106500	61	19q13.43	61	S4(1.8)	0.375	1	32		0
chr15	27767500	27827500	60	15q12	60	S4(1.8)	0	0	0	GABRG3	0
chr12	42065500	42125500	60	12q12	60	S4(1.8)	0	0	0		0
chr5	6002500	6062500	60	5p15.32	60	S4(1.8)	0	0	0		0
chr6	153723500	153782500	59	6q25.2	59	S4(1.8)	0	0	0		0
chr10	65996500	66055500	59	10q21.3	59	S4(1.8)	0	0	0		0
chr8	136307500	136365500	58	8q24.22	58	S4(1.8)	0	0	0		0
chr19	20780500	20838500	58	19p12	58	S4(1.8)	0	0	0		0
chr13	97098500	97156500	58	13q32.1	58	S4(1.8)	0	0	0	HS6ST3	0
chr13	66831500	66888500	57	13q21.32	57	S4(1.8)	0	0	0	PCDH9	0
chr5	117647500	117704500	57	5q23.1	57	S4(1.8)	0	0	0		0
chr6	29296500	29353500	57	6p22.1	57	S4(1.8)	0	0	0		0
chr15	27933500	27989500	56	15q12	56	S4(1.8)	0	0	0		0
chr5	18006500	18062500	56	5p15.1	56	S4(1.8)	0	0	0		0
chrX	130288500	130344500	56	Xq26.1	56	S4(1.8)	0	0	0		0
chr1	73360500	73416500	56	1p31.1	56	S4(1.8)	0	0	0		0
chr15	27827500	27882500	55	15q12	55	S4(1.8)	0	0	0		0
chr4	28693500	28748500	55	4p15.1	55	S4(1.8)	0.001	0	0		0
chrX	7985500	8040500	55	Xp22.31	55	S4(1.8)	0.03	1	439		0
chr11	133141500	133196500	55	11q25	55	S4(1.8)	0	0	0	OPCML	0
chr9	1611500	1665500	54	9p24.3	54	S4(1.8)	0	0	0		0
chr9	88252500	88306500	54	9q21.33	54	S4(1.8)	0.001	0	0		0
chr18	1513500	1566500	53	18p11.32	53	S4(1.8)	0	0	0		0
chr15	46986500	47039500	53	15q21.1	53	S4(1.8)	0.001	0	0		0
chr8	20792500	20845500	53	8p21.3	53	S4(1.8)	0	0	0		0
chr12	74918500	74971500	53	12q21.1	53	S4(1.8)	0.762	0.736	39		0
chr8	55732500	55785500	53	8q12.1	53	S4(1.8)	0	0	0		0
chr21	31392500	31444500	52	21q21.3	52	S4(1.8)	0	0	0		0
chr3	87754500	87806500	52	3p11.2	52	S4(1.8)	0	0	0		0
chr18	14145500	14197500	52	18p11.21	52	S4(1.8)	0	0	0		0
chr15	27882500	27933500	51	15q12	51	S4(1.8)	0	0	0		0
chr3	144772500	144822500	50	3q24	50	S4(1.8)	0	0	0		0
chr17	10993500	11043500	50	17p12	50	S4(1.8)	0	0	0		0
chr5	109941500	109991500	50	5q22.1	50	S4(1.8)	0.001	0	0		0
chrX	132364500	132414500	50	Xq26.2	50	S4(1.8)	0	0	0		0
chrX	75558500	75608500	50	Xq13.3	50	S4(1.8)	0	0	0		0
chr7	21392500	21442500	50	7p15.3	50	S4(1.8)	0	0	0		0
chr8	52538500	52588500	50	8q11.22	50	S4(1.8)	0	0	0		0
chr18	14197500	14247500	50	18p11.21	50	S4(1.8)	0	0	0		0
chr8	87048500	87098500	50	8q21.3	50	S4(1.8)	0	0	0		0
chr15	97601500	97651500	50	15q26.2	50	S4(1.8)	0	0	0		0
chr3	116096500	116146500	50	3q13.31	50	S4(1.8)	0	0	0	LSAMP	0
chr10	132558500	132608500	50	10q26.3	50	S4(1.8)	0.008	0.08	4		0
chr4	9116500	9371500	255	4p16.1	49	S4(1.8)	0.001	0	0		0
chr1	88695500	88743500	48	1p22.2	48	S4(1.8)	0	0	0		0
chrX	84271500	84319500	48	Xq21.1	48	S4(1.8)	0.505	1	101		0
chr5	120664500	120711500	47	5q23.1	47	S4(1.8)	0	0	0		0
chr2	156858500	156905500	47	2q24.1	47	S4(1.8)	0	0	0		0
chrX	121273500	121320500	47	Xq25	47	S4(1.8)	0	0	0		0
chr4	23152500	23199500	47	4p15.2	47	S4(1.8)	0	0	0		0
chr15	97408500	97454500	46	15q26.2	46	S4(1.8)	0	0	0		0
chr6	19042500	19088500	46	6p22.3	46	S4(1.8)	0	0	0		0
chr15	27297500	27343500	46	15q12	46	S4(1.8)	0	0	0	GABRG3	0
chr15	23759500	23804500	45	15q11.2	45	S4(1.8)	0	0	0		0
chr10	66055500	66100500	45	10q21.3	45	S4(1.8)	0	0	0		0
chr17	11179500	11224500	45	17p12	45	S4(1.8)	0	0	0		0
chr12	34687500	34731500	44	12p11.1	44	S4(1.8)	0	0	0		0
chrX	57766500	57810500	44	Xp11.21	44	S4(1.8)	0	0	0		0
chrX	51568500	51612500	44	Xp11.22	44	S4(1.8)	0.478	1	103		0
chr4	82644500	82687500	43	4q21.22	43	S4(1.8)	0	0	0	RASGEF1B	0
chrX	42192500	42234500	42	Xp11.4	42	S4(1.8)	0	0	0		0
chr6	122935500	122977500	42	6q22.31	42	S4(1.8)	0.001	0	0		0
chr20	7145500	7187500	42	20p12.3	42	S4(1.8)	0	0	0		0
chr12	99790500	99832500	42	12q23.1	42	S4(1.8)	0	0	0	ANKS1B	1	2		2
chr7	13398500	13440500	42	7p21.3	42	S4(1.8)	0	0	0	AC011288.2	0
chr12	61696500	61737500	41	12q14.1	41	S4(1.8)	0	0	0		0
chr7	3622500	3662500	40	7p22.2	40	S4(1.8)	0	0	0	SDK1	0
chr17	11417500	11457500	40	17p12	40	S4(1.8)	0	0	0		0
chr5	87627500	87666500	39	5q14.3	39	S4(1.8)	0.033	1	172		0
chr10	2102500	2141500	39	10p15.3	39	S4(1.8)	0	0	0		0
chrX	147050500	147088500	38	Xq27.3	38	S4(1.8)	0.003	0	0		0
chr2	23070500	23108500	38	2p24.1	38	S4(1.8)	0	0	0		0
chr14	62925500	62962500	37	14q23.2	37	S4(1.8)	0	0	0		0
chr7	56870500	56907500	37	7p11.2	37	S4(1.8)	0	0	0		0
chr15	24663500	24699500	36	15q11.2	36	S4(1.8)	0	0	0		0
chrX	57836500	57872500	36	Xp11.21	36	S4(1.8)	0	0	0		0
chr13	26222500	26257500	35	13q12.13	35	S4(1.8)	0	0	0	ATP8A2	0
chrX	132580500	132615500	35	Xq26.2	35	S4(1.8)	0	0	0		0
chr12	40824500	40859500	35	12q12	35	S4(1.8)	0	0	0		0
chr9	1578500	1611500	33	9p24.3	33	S4(1.8)	0	0	0		0
chr7	3841500	3873500	32	7p22.2	32	S4(1.8)	0	0	0	SDK1	0
chr21	15645500	15677500	32	21q11.2	32	S4(1.8)	0	0	0		0
chr3	22242500	22273500	31	3p24.3	31	S4(1.8)	0	0	0	ZNF385D	0
chr5	50418500	50449500	31	5q11.1	31	S4(1.8)	0	0	0		0
chr18	15300500	15339500	39	18p11.21	30	S4(1.8)	0	0	0		0
chr11	49194500	49224500	30	11p11.12	30	S4(1.8)	0	0	0		0
chr14	19769500	19798500	29	14q11.2	29	S4(1.8)	0	0	0		0
chr8	136988500	137016500	28	8q24.23	28	S4(1.8)	0	0	0		0
chr15	53919500	53944500	25	15q21.3	25	S4(1.8)	0	0	0		0
chr1	166513500	166534500	21	1q24.1	21	S4(1.8)	0	0	0		0
chr2	95339500	95340500	1	2q11.1	1	S4(1.8)	0	0	0		0
chr1	4043500	4831500	788	1p36.32	788	S4(1.9)	0.078	0.148	142		0
chr2	199304500	199761500	457	2q33.1	457	S4(1.9)	0	0	0		0
chr8	15725500	16178500	453	8p22	453	S4(1.9)	0	0	0		0
chr5	115935500	116374500	439	5q23.1	439	S4(1.9)	0	0.007	3		0
chr2	142468500	142870500	402	2q22.2	402	S4(1.9)	0	0	0	LRP1B	0
chr1	48828500	49194500	366	1p33	366	S4(1.9)	0	0.011	4	AGBL4	0
chr4	22787500	23152500	365	4p15.2	365	S4(1.9)	0	0	0		0
chr5	151654500	152000500	346	5q33.1	346	S4(1.9)	0	0	0	AC091969.1	0
chr10	84989500	85332500	343	10q23.1	343	S4(1.9)	0	0	0		0
chr8	72078500	72406500	328	8q13.3	328	S4(1.9)	0	0	0		0
chr12	85533500	85860500	327	12q21.31	327	S4(1.9)	0	0	0		0
chr12	34079500	34395500	316	12p11.1	316	S4(1.9)	0.008	0.098	31		0
chr8	71762500	72078500	316	8q13.3	316	S4(1.9)	0.003	0	0		0
chr8	43503500	43802500	299	8p11.1	299	S4(1.9)	0	0	0		0
chr19	24107500	24381500	274	19p12	274	S4(1.9)	0.566	0.701	157		0
chr20	37921500	38193500	272	20q12	272	S4(1.9)	0.001	0	0		0
chr21	11194500	14716500	3522	21p-q	262	S4(1.9)	0.001	0.006	12		0
chr1	142563500	142875500	312	1q12-21	248	S4(1.9)	0.001	0	0		0
chr1	175900500	176141500	241	1q25.1-2	241	S4(1.9)	0.001	0	0		0
chr9	88011500	88252500	241	9q21.33	241	S4(1.9)	0	0	0		0
chr18	5422500	5648500	226	18p11.31	226	S4(1.9)	0	0	0		0
chr3	74943500	75161500	218	3p12.3	218	S4(1.9)	0	0	0		0
chr21	10988500	11194500	206	21p11.1	206	S4(1.9)	0	0	0		0
chrX	141033500	141233500	200	Xq27.2	200	S4(1.9)	0	0	0		0
chr8	46991500	47179500	188	8q11.1	188	S4(1.9)	0	0	0		0
chrX	85117500	85303500	186	Xq21.2	186	S4(1.9)	0	0	0		0
chr12	71386500	71570500	184	12q15-21	184	S4(1.9)	0	0	0		0
chr16	77782500	77964500	182	16q23.1	182	S4(1.9)	0.342	0.786	204		0
chr6	77246500	77425500	179	6q14.1	179	S4(1.9)	0.001	0	0		0
chrX	84094500	84271500	177	Xq21.1	177	S4(1.9)	0.04	0.079	101		0
chr8	137774500	137947500	173	8q24.23	173	S4(1.9)	0	0	0		0
chrX	58076500	58249500	173	Xp11.1-21	173	S4(1.9)	0	0	0		0
chrX	56177500	56335500	158	Xp11.21	158	S4(1.9)	0.189	1	158		0
chr19	20838500	20996500	158	19p12	158	S4(1.9)	0.036	0.247	47		0
chr3	144822500	144979500	157	3q24	157	S4(1.9)	0	0	0		0
chr10	131188500	131344500	156	10q26.3	156	S4(1.9)	0.036	0.513	303		0
chr9	14042500	14190500	148	9p23	148	S4(1.9)	0.001	0.02	3		0
chrX	114991500	115136500	145	Xq23	145	S4(1.9)	0	0	0		0
chr12	34423500	34567500	144	12p11.1	144	S4(1.9)	0	0	0		0
chr2	148025500	148168500	143	2q22.3	143	S4(1.9)	0	0	0		0
chr1	48612500	48753500	141	1p33	141	S4(1.9)	0	0	0		0
chr15	23804500	23942500	138	15q11.2	138	S4(1.9)	0	0	0		0
chr10	86520500	86658500	138	10q23.1	138	S4(1.9)	0	0	0		0
chrX	49841500	49979500	138	Xp11.22	138	S4(1.9)	0.031	0.225	186		0
chr12	14068500	14205500	137	12p13.1	137	S4(1.9)	0	0	0		0
chr1	176618500	176753500	135	1q25.2	135	S4(1.9)	0.001	0	0		0
chr5	129783500	129918500	135	5q23.3	135	S4(1.9)	0	0	0		0
chr21	22873500	23007500	134	21q21.1	134	S4(1.9)	0.033	0.381	555	NCAM2	0
chr3	153924500	154058500	134	3q25.2	134	S4(1.9)	0.01	0.44	145		0
chr3	180534500	180667500	133	3q26.33	133	S4(1.9)	0.629	0.346	88		0
chrX	75608500	75736500	128	Xq13.3	128	S4(1.9)	0.028	0.492	63		0
chr10	85402500	85529500	127	10q23.1	127	S4(1.9)	0	0	0		0
chrX	151626500	151751500	125	Xq28	125	S4(1.9)	0	0	0		0
chr11	37993500	38117500	124	11p12	124	S4(1.9)	0	0	0		0
chr21	15347500	15470500	123	21q11.2	123	S4(1.9)	0.144	0.585	141		0
chr6	103096500	103217500	121	6q16.3	121	S4(1.9)	0	0	0		0
chr20	12130500	12251500	121	20p12.1	121	S4(1.9)	0.006	0	0		0
chr5	129486500	129603500	117	5q23.3	117	S4(1.9)	0.005	0.06	255		0
chr1	96153500	96270500	117	1p21.3	117	S4(1.9)	0	0	0		0
chr7	36969500	37085500	116	7p14.2	116	S4(1.9)	0	0	0	ELMO1	0
chr8	87098500	87213500	115	8q21.3	115	S4(1.9)	0	0	0		0
chr12	82975500	83088500	113	12q21.31	113	S4(1.9)	0.008	0.08	454		0
chr18	5174500	5287500	113	18p11.31	113	S4(1.9)	0.107	0.124	14		0
chr21	15190500	15302500	112	21q11.2	112	S4(1.9)	0	0	0		0
chr13	105913500	106025500	112	13q33.2	112	S4(1.9)	0	0	0		0
chr13	67407500	67518500	111	13q21.32	111	S4(1.9)	0	0	0	PCDH9	0
chr8	109968500	110073500	105	8q23.1	105	S4(1.9)	0	0	0		0
chr1	216432500	216537500	105	1q41	105	S4(1.9)	0	0	0	USH2A	0
chr21	31444500	31545500	101	21q21-22	101	S4(1.9)	0	0	0		0
chr9	13942500	14042500	100	9p23	100	S4(1.9)	0.002	0.04	4		0
chrX	55613500	55713500	100	Xp11.21	100	S4(1.9)	0	0	0		0
chrX	51612500	51709500	97	Xp11.22	97	S4(1.9)	0.501	0.361	103		0
chr2	41480500	41576500	96	2p22.1	96	S4(1.9)	0.001	0	0		0
chr10	19120500	19214500	94	10p12.31	94	S4(1.9)	0	0	0		0
chr2	142375500	142468500	93	2q22.2	93	S4(1.9)	0	0	0	LRP1B	0.326	1		1
chr5	129173500	129264500	91	5q23.3	91	S4(1.9)	0.006	0.286	255		0
chrX	116924500	117015500	91	Xq24	91	S4(1.9)	0	0	0		0
chr9	78113500	78204500	91	9q21.13	91	S4(1.9)	0	0	0		0
chr8	137683500	137774500	91	8q24.23	91	S4(1.9)	0	0	0		0
chr9	87838500	87928500	90	9q21.33	90	S4(1.9)	0	0	0		0
chr2	168306500	168396500	90	2q24.3	90	S4(1.9)	0.036	1	527		0
chr13	108917500	109006500	89	13q33.3	89	S4(1.9)	0.038	0.528	61		0
chr11	115127500	115214500	87	11q23.3	87	S4(1.9)	0	0	0		0
chr4	145231500	145315500	84	4q31.21	84	S4(1.9)	0	0	0		0
chr12	39652500	39736500	84	12q12	84	S4(1.9)	0	0	0		0
chr3	68572500	68656500	84	3p14.1	84	S4(1.9)	0	0	0	FAM19A1	0
chrX	79779500	79862500	83	Xq21.1	83	S4(1.9)	0.003	0.084	4		0
chr2	108425500	108568500	143	2q12.3	82	S4(1.9)	0	0	0		0
chr8	63211500	63292500	81	8q12.3	81	S4(1.9)	0	0	0	NKAIN3	0
chr3	104046500	104127500	81	3q13.11	81	S4(1.9)	0	0	0		0
chr1	176538500	176618500	80	1q25.2	80	S4(1.9)	0.001	0	0		0
chr2	195844500	195924500	80	2q32.3	80	S4(1.9)	0	0	0		0
chr2	156905500	156984500	79	2q24.1	79	S4(1.9)	0	0	0		0
chr14	63123500	63202500	79	14q23.2	79	S4(1.9)	0	0	0		0
chr3	61069500	61147500	78	3p14.2	78	S4(1.9)	0	0	0	FHIT	0
chr3	139577500	139654500	77	3q23	77	S4(1.9)	0	0	0	CLSTN2	0
chr2	294500	371500	77	2p25.3	77	S4(1.9)	0.001	0	0		0
chrX	35276500	35353500	77	Xp21.1	77	S4(1.9)	0	0	0		0
chr6	122740500	122817500	77	6q22.31	77	S4(1.9)	0.207	1	74		0
chrX	72447500	72523500	76	Xq13.2	76	S4(1.9)	0	0	0		0
chr14	83573500	83649500	76	14q31.1-2	76	S4(1.9)	0	0	0		0
chr4	189954500	190030500	76	4q35.2	76	S4(1.9)	0	0	0		0
chr10	85529500	85604500	75	10q23.1	75	S4(1.9)	0	0	0		0
chr16	60149500	60223500	74	16q21	74	S4(1.9)	0.002	0	0		0
chrX	79862500	79936500	74	Xq21.1	74	S4(1.9)	0	0	0		0
chrX	104213500	104287500	74	Xq22.3	74	S4(1.9)	0	0	0	IL1RAPL2	0
chr8	15652500	15725500	73	8p22	73	S4(1.9)	0.008	0.082	262		0
chr10	84918500	84989500	71	10q23.1	71	S4(1.9)	0	0	0		0
chrX	51758500	51865500	107	Xp11.22	71	S4(1.9)	0.001	0.028	3		0
chr18	5648500	5719500	71	18p11.31	71	S4(1.9)	0	0	0		0
chr1	13158500	13788500	630	1p36.21	71	S4(1.9)	0	0	0		0
chr2	57653500	57723500	70	2p16.1	70	S4(1.9)	0.001	0	0		0
chr13	91356500	91425500	69	13q31.3	69	S4(1.9)	0.001	0	0		0
chrX	104074500	104143500	69	Xq22.3	69	S4(1.9)	0	0	0	IL1RAPL2	0
chr5	62558500	62626500	68	5q12.1	68	S4(1.9)	0	0	0		0
chr8	47529500	47597500	68	8q11.1	68	S4(1.9)	0	0	0		0
chr4	132612500	132689500	77	4q28.3	68	S4(1.9)	0	0	0		0
chr3	103980500	104046500	66	3q13.11	66	S4(1.9)	0	0	0		0
chrX	8040500	8106500	66	Xp22.31	66	S4(1.9)	0.03	1	439		0
chr2	79970500	80036500	66	2p12	66	S4(1.9)	0	0	0	CTNNA2	0
chrX	99507500	99573500	66	Xq22.1	66	S4(1.9)	0	0	0		0
chr7	113592500	113656500	64	7q31.1	64	S4(1.9)	0.001	0	0		0
chr22	17164500	17228500	64	22q11.1	64	S4(1.9)	0	0	0		0
chr15	22490500	22551500	61	15q11.2	61	S4(1.9)	0	0	0		0
chr10	61141500	61202500	61	10q21.1-2	61	S4(1.9)	0	0	0		0
chr13	73068500	73128500	60	13q21.33	60	S4(1.9)	0	0	0		0
chr1	107835500	107894500	59	1p13.3	59	S4(1.9)	0.048	1	225		0
chrX	101364500	101423500	59	Xq22.1	59	S4(1.9)	0	0	0		0
chr13	91298500	91356500	58	13q31.3	58	S4(1.9)	0.001	0	0		0
chr2	209883500	209941500	58	2q34	58	S4(1.9)	0	0	0		0
chrX	131832500	131889500	57	Xq26.2	57	S4(1.9)	0	0	0		0
chr20	29514500	29571500	57	20q11.21	57	S4(1.9)	0	0	0		0
chr19	28428500	28485500	57	19q11	57	S4(1.9)	0.005	0	0		0
chr13	19174500	19230500	56	13q11	56	S4(1.9)	0	0	0		0
chr20	29571500	29626500	55	20q11.21	55	S4(1.9)	0.041	0.291	194		0
chr2	21729500	21784500	55	2p24.1	55	S4(1.9)	0	0	0	AC067959.1	0
chr11	56548500	56603500	55	11q12.1	55	S4(1.9)	0	0	0		0
chr6	29143500	29197500	54	6p22.1	54	S4(1.9)	0	0	0		0
chr15	55027500	55079500	52	15q21.3	52	S4(1.9)	0	0	0		0
chrX	110498500	110550500	52	Xq23	52	S4(1.9)	0	0	0		0
chr19	28376500	28428500	52	19q11	52	S4(1.9)	0.021	0.327	110		0
chr10	69110500	69161500	51	10q21.3	51	S4(1.9)	0.001	0	0	CTNNA3	0
chrX	56557500	56608500	51	Xp11.21	51	S4(1.9)	0.449	0.392	56		0
chrX	84043500	84094500	51	Xq21.1	51	S4(1.9)	0	0	0		0
chr15	22551500	22738500	187	15q11.2	51	S4(1.9)	0	0	0		0
chrX	6219500	6270500	51	Xp22.31	51	S4(1.9)	0	0	0		0
chr2	57765500	57816500	51	2p16.1	51	S4(1.9)	0	0	0		0
chr2	143047500	143097500	50	2q22.2	50	S4(1.9)	0	0	0		0
chr14	63073500	63123500	50	14q23.2	50	S4(1.9)	0	0	0		0
chr14	63023500	63073500	50	14q23.2	50	S4(1.9)	0	0	0		0
chr2	53357500	53407500	50	2p16.2	50	S4(1.9)	0	0	0		0
chr12	40859500	40909500	50	12q12	50	S4(1.9)	0	0	0		0
chr2	103385500	103435500	50	2q12.1	50	S4(1.9)	0.037	1	108		0
chr2	138166500	138216500	50	2q22.1	50	S4(1.9)	0	0	0	THSD7B	0
chr12	81761500	81810500	49	12q21.31	49	S4(1.9)	0	0	0	PPFIA2	0
chr1	76839500	76888500	49	1p31.1	49	S4(1.9)	0.003	0	0	ST6GALNAC3	0
chr12	33315500	33364500	49	12p11.1	49	S4(1.9)	0	0	0		0
chr2	211202500	211251500	49	2q34	49	S4(1.9)	0	0	0		0
chr10	19994500	20043500	49	10p12.31	49	S4(1.9)	0	0	0	C10orf112	0
chr12	34731500	34780500	49	12p11.1	49	S4(1.9)	0	0	0		0
chr2	13610500	13659500	49	2p24.3	49	S4(1.9)	0	0	0		0
chrX	74928500	74977500	49	Xq13.3	49	S4(1.9)	0	0	0		0
chr8	72406500	72455500	49	8q13.3	49	S4(1.9)	0	0	0		0
chrX	130240500	130288500	48	Xq26.1	48	S4(1.9)	0	0	0		0
chr13	82999500	83047500	48	13q31.1	48	S4(1.9)	0	0	0		0
chr21	15597500	15645500	48	21q11.2	48	S4(1.9)	0.001	0	0		0
chr5	8068500	8116500	48	5p15.31	48	S4(1.9)	0	0	0		0
chr3	70369500	70417500	48	3p13	48	S4(1.9)	0	0	0		0
chr14	46015500	46063500	48	14q21.2	48	S4(1.9)	0.006	0	0		0
chr2	132864500	132911500	47	2q21.2	47	S4(1.9)	0	0	0		0
chr19	20733500	20780500	47	19p12	47	S4(1.9)	0	0	0		0
chr21	15513500	15560500	47	21q11.2	47	S4(1.9)	0.04	0.553	141		0
chr17	9299500	9346500	47	17p13.1	47	S4(1.9)	0	0	0		0
chrX	74593500	74640500	47	Xq13.3	47	S4(1.9)	0.003	0	0		0
chrX	42274500	42320500	46	Xp11.4	46	S4(1.9)	0.001	0	0		0
chr19	20598500	20644500	46	19p12	46	S4(1.9)	0.002	0	0		0
chr2	107295500	107341500	46	2q12.2	46	S4(1.9)	0	0	0		0
chr4	190030500	190075500	45	4q35.2	45	S4(1.9)	0	0	0		0
chr21	15302500	15347500	45	21q11.2	45	S4(1.9)	0	0	0		0
chr10	113154500	113199500	45	10q25.2	45	S4(1.9)	0	0	0		0
chr4	165947500	165991500	44	4q32.3	44	S4(1.9)	0	0	0		0
chr20	38798500	38842500	44	20q12	44	S4(1.9)	0	0	0		0
chr7	36925500	36969500	44	7p14.2	44	S4(1.9)	0	0	0	ELMO1	0
chr13	83047500	83090500	43	13q31.1	43	S4(1.9)	0	0	0		0
chrX	5839500	5882500	43	Xp22.32	43	S4(1.9)	0	0	0		0
chr2	6858500	6900500	42	2p25.2	42	S4(1.9)	0	0	0		0
chr11	50084500	50126500	42	11p11.12	42	S4(1.9)	0	0	0		0
chr3	116146500	116188500	42	3q13.31	42	S4(1.9)	0	0	0	LSAMP	0
chrX	28866500	28908500	42	Xp21.3	42	S4(1.9)	0.005	0	0	IL1RAPL1	0
chrX	140041500	140082500	41	Xq27.1	41	S4(1.9)	0	0	0		0
chr3	88831500	88872500	41	3p11.1	41	S4(1.9)	0	0	0		0
chr5	129133500	129173500	40	5q23.3	40	S4(1.9)	0	0	0		0
chr11	56508500	56548500	40	11q12.1	40	S4(1.9)	0	0	0		0
chr2	132755500	132795500	40	2q21.2	40	S4(1.9)	0	0	0		0
chr20	38759500	38798500	39	20q12	39	S4(1.9)	0	0	0		0
chr6	122817500	122856500	39	6q22.31	39	S4(1.9)	0.006	0	0		0
chr7	25738500	25776500	38	7p15.2	38	S4(1.9)	0	0	0		0
chr3	162638500	162675500	37	3q26.1	37	S4(1.9)	0	0	0		0
chrX	75826500	75863500	37	Xq13.3	37	S4(1.9)	0.001	0	0		0
chr2	41696500	41733500	37	2p22.1	37	S4(1.9)	0	0	0		0
chrX	55713500	55749500	36	Xp11.21	36	S4(1.9)	0.104	0.194	89		0
chrX	5981500	6017500	36	Xp22.31-32	36	S4(1.9)	0	0	0		0
chr3	81115500	81151500	36	3p12.2	36	S4(1.9)	0	0	0		0
chr9	76299500	76335500	36	9q21.13	36	S4(1.9)	0	0	0		0
chr6	79022500	79057500	35	6q14.1	35	S4(1.9)	0	0	0		0
chr2	41661500	41696500	35	2p22.1	35	S4(1.9)	0	0	0		0
chr18	25104500	25138500	34	18q12.1	34	S4(1.9)	0	0	0		0
chr5	129918500	129952500	34	5q23.3	34	S4(1.9)	0	0	0		0
chr12	81727500	81761500	34	12q21.31	34	S4(1.9)	0	0	0	PPFIA2	0
chr3	88797500	88831500	34	3p11.1	34	S4(1.9)	0	0	0		0
chr20	12097500	12130500	33	20p12.1-2	33	S4(1.9)	0.006	0	0		0
chr11	84845500	84877500	32	11q14.1	32	S4(1.9)	0	0	0	DLG2	0
chrX	141233500	141264500	31	Xq27.2	31	S4(1.9)	0	0	0		0
chrX	139331500	139362500	31	Xq27.1	31	S4(1.9)	0	0	0		0
chr2	211172500	211202500	30	2q34	30	S4(1.9)	0	0	0		0
chr14	45008500	45038500	30	14q21.2	30	S4(1.9)	0	0	0		0
chr4	158561500	158591500	30	4q32.1	30	S4(1.9)	0	0	0		0
chrX	147904500	147934500	30	Xq28	30	S4(1.9)	0	0	0	AFF2	0
chr1	96123500	96153500	30	1p21.3	30	S4(1.9)	0	0	0		0
chr9	76269500	76299500	30	9q21.13	30	S4(1.9)	0.002	0	0		0
chr2	91895500	91924500	29	2p11.1	29	S4(1.9)	0	0	0		0
chr12	34395500	34423500	28	12p11.1	28	S4(1.9)	0	0	0		0
chrX	101423500	101451500	28	Xq22.1	28	S4(1.9)	0	0	0		0
chrX	83916500	83942500	26	Xq21.1	26	S4(1.9)	0	0	0		0
chr8	46965500	46991500	26	8q11.1	26	S4(1.9)	0	0	0		0
chr1	76888500	76914500	26	1p31.1	26	S4(1.9)	0.003	0	0	ST6GALNAC3	0
chrX	57810500	57836500	26	Xp11.21	26	S4(1.9)	0	0	0		0
chr2	164972500	164998500	26	2q24.3	26	S4(1.9)	0	0	0	AC092684.1	0
chr18	5397500	5422500	25	18p11.31	25	S4(1.9)	0	0	0		0
chr15	22290500	22315500	25	15q11.2	25	S4(1.9)	0	0	0		0
chr8	63186500	63211500	25	8q12.3	25	S4(1.9)	0	0	0	NKAIN3	0
chrX	57326500	57345500	19	Xp11.21	19	S4(1.9)	0.01	0	0		0
chr21	10038500	10039500	1	21p11.2	1	S4(1.9)	0	0	0		0
chr15	91903500	92993500	1090	15q26.1	1090	S4(2)	0.141	0.35	324		0
chr11	134150500	134963500	813	11q25	813	S4(2)	0	0	0		0
chr2	185409500	186182500	773	2q32.1	773	S4(2)	0.001	0	0		0
chr12	83415500	84182500	767	12q21.31	767	S4(2)	0.013	0.154	454		0
chr4	175633500	176326500	693	4q34.1-2	693	S4(2)	0	0	0		0
chr7	3920500	4571500	651	7p22.1-2	651	S4(2)	0	0	0	SDK1	0
chrX	131142500	131780500	638	Xq26.2	638	S4(2)	0.066	0.414	264		0
chr1	82906500	83527500	621	1p31.1	621	S4(2)	0	0	0		0
chr1	13788500	14343500	555	1p36.21	555	S4(2)	0.364	0.24	130		0
chr1	236730500	237276500	546	1q43	546	S4(2)	0.2	0.255	139	RYR2	0
chr10	61202500	61744500	542	10q21.2	542	S4(2)	0	0	0		0
chr5	174012500	174520500	508	5q35.2	508	S4(2)	0	0	0		0
chr1	69420500	69919500	499	1p31.1-2	499	S4(2)	0	0	0		0
chr14	78877500	79348500	471	14q24-31	471	S4(2)	0	0	0	NRXN3	0
chr6	8443500	8902500	459	6p24.3	459	S4(2)	0.024	0.767	350		0
chr7	133130500	133583500	453	7q33	453	S4(2)	0.774	1	849	EXOC4	0
chr20	51375500	51822500	447	20q13.2	447	S4(2)	0	0	0	TSHZ2	0
chr13	22281500	22726500	445	13q12.11	445	S4(2)	0	0	0		0
chr10	122953500	123396500	443	10q26.12-13	443	S4(2)	0	0	0		0
chr10	38229500	38671500	442	10p11.1	442	S4(2)	0.125	0.344	60		0
chr9	92993500	93430500	437	9q22.2	437	S4(2)	0	0	0		0
chr16	25561500	25989500	428	16p12.1	428	S4(2)	0	0	0		0
chr5	147326500	147751500	425	5q32	425	S4(2)	0	0	0		0
chr4	165991500	166401500	410	4q32.3	410	S4(2)	0.139	0.339	121		0
chr10	133271500	133716500	445	10q26.3	409	S4(2)	0.008	0.099	161		0
chr20	40541500	40943500	402	20q12	402	S4(2)	0	0	0	PTPRT	0
chr8	106354500	106741500	387	8q23.1	387	S4(2)	0.001	0	0	RP11-127H5.1	0
chrX	63357500	63729500	372	Xq11.2	372	S4(2)	0.002	0.035	9		0
chr18	5810500	6168500	358	18p11.31	358	S4(2)	0	0	0		0
chr6	70435500	70790500	355	6q13	355	S4(2)	0	0	0		0
chrX	42320500	42673500	353	Xp11.3-4	353	S4(2)	0	0	0		0
chr16	5364500	5714500	350	16p13.3	350	S4(2)	0	0	0	RP11-420N3.2	0
chr2	21267500	21616500	349	2p24.1	349	S4(2)	0	0	0	AC067959.1	0
chr15	20012500	20525500	513	15q11.1	343	S4(2)	0	0	0		0
chr6	76918500	77246500	328	6q14.1	328	S4(2)	0	0	0		0
chr5	109618500	109941500	323	5q22.1	323	S4(2)	0	0	0		0
chr12	125903500	126220500	317	12q24.32	317	S4(2)	0.003	0	0		0
chr12	103523500	103840500	317	12q23.2-3	317	S4(2)	0	0	0		0
chrX	151310500	151626500	316	Xq28	316	S4(2)	0	0	0		0
chr2	129450500	129758500	308	2q14.3	308	S4(2)	0	0	0		0
chrX	57462500	57766500	304	Xp11.21	304	S4(2)	0.049	0.227	69		0
chr5	120711500	121012500	301	5q23.1	301	S4(2)	0.001	0.01	3		0
chr8	85909500	86199500	290	8q21.2	290	S4(2)	0.033	0.19	43		0
chrX	63795500	64083500	288	Xq11.2	288	S4(2)	0	0	0		0
chr5	120380500	120664500	284	5q23.1	284	S4(2)	0	0	0		0
chr8	140353500	140633500	280	8q24.3	280	S4(2)	0	0	0		0
chr12	41789500	42065500	276	12q12	276	S4(2)	0	0	0		0
chr12	130912500	131184500	272	12q24.33	272	S4(2)	0	0	0		0
chr4	134406500	134676500	270	4q28.3	270	S4(2)	0.001	0	0		0
chr11	116013500	116283500	270	11q23.3	270	S4(2)	0	0	0		0
chr18	7845500	8113500	268	18p11.23	268	S4(2)	0.931	1	846	PTPRM	0.11	2		2
chr6	86774500	87042500	268	6q14.3	268	S4(2)	0.001	0	0		0
chr3	77082500	77342500	260	3p12.3	260	S4(2)	0.093	0.981	614	ROBO2	0
chr13	72642500	72889500	247	13q21.33	247	S4(2)	0	0	0		0
chr12	126491500	126737500	246	12q24.32	246	S4(2)	0	0	0		0
chr2	141455500	141700500	245	2q22.1	245	S4(2)	0	0	0	LRP1B	0
chr2	164733500	164972500	239	2q24.3	239	S4(2)	0	0	0	AC092684.1	0
chr8	87299500	87533500	234	8q21.3	234	S4(2)	0.531	0.765	143		0
chr6	19168500	19395500	227	6p22.3	227	S4(2)	0	0	0		0
chr3	167434500	167653500	219	3q26.1-2	219	S4(2)	0.006	0.1	22		0
chr14	84218500	84433500	215	14q31.2	215	S4(2)	0	0	0		0
chr7	10874500	11085500	211	7p21.3	211	S4(2)	0.181	0.346	245		0
chrX	150663500	150872500	209	Xq28	209	S4(2)	0	0	0		0
chrX	57872500	58076500	204	Xp11.21	204	S4(2)	0	0	0		0
chr6	153782500	153982500	200	6q25.2	200	S4(2)	0	0	0		0
chr8	31497500	31692500	195	8p12	195	S4(2)	0	0	0	NRG1	0
chr5	87737500	87930500	193	5q14.3	193	S4(2)	0	0	0		0
chr3	140326500	140515500	189	3q23	189	S4(2)	0	0	0		0
chr16	77964500	78147500	183	16q23.1	183	S4(2)	0.131	0.415	241	WWOX	0
chr22	16982500	17164500	182	22q11.1	182	S4(2)	0	0	0		0
chr13	72889500	73068500	179	13q21.33	179	S4(2)	0	0	0		0
chr4	149817500	149995500	178	4q31.23	178	S4(2)	0	0	0		0
chr10	117029500	117202500	173	10q25.3	173	S4(2)	0	0	0	ATRNL1	0
chr19	37225500	37383500	158	19q13.12	158	S4(2)	0.165	0.88	108		0
chr2	108283500	108425500	142	2q12.3	142	S4(2)	0	0	0		0
chr4	121586500	121728500	142	4q27	142	S4(2)	0	0	0		0
chr12	13884500	14025500	141	12p13.1	141	S4(2)	0	0	0		0
chrX	55749500	55890500	141	Xp11.21	141	S4(2)	0.178	0.582	89		0
chr13	84415500	84554500	139	13q31.1	139	S4(2)	0.001	0	0		0
chr5	85816500	85954500	138	5q14.3	138	S4(2)	0.045	0.058	8		0
chr12	87973500	88111500	138	12q21.32	138	S4(2)	0	0	0		0
chr12	39991500	40127500	136	12q12	136	S4(2)	0	0	0		0
chr9	121716500	121849500	133	9q33.1	133	S4(2)	0	0	0		0
chr10	19805500	19936500	131	10p12.31	131	S4(2)	0	0	0	C10orf112	0
chr1	107095500	107225500	130	1p13-21	130	S4(2)	0	0	0		0
chr12	39736500	39863500	127	12q12	127	S4(2)	0	0	0		0
chr5	8116500	8242500	126	5p15.31	126	S4(2)	0	0	0		0
chr3	68656500	68780500	124	3p14.1	124	S4(2)	0.001	0.032	4		0
chrX	51416500	51568500	152	Xp11.22	123	S4(2)	0.093	0.191	103		0
chr5	87364500	87484500	120	5q14.3	120	S4(2)	0	0	0		0
chrX	101246500	101364500	118	Xq22.1	118	S4(2)	0	0	0		0
chrX	21057500	21165500	108	Xp22.12	108	S4(2)	0	0	0		0
chr12	87025500	87129500	104	12q21.32	104	S4(2)	0	0	0	MGAT4C	0
chr2	53256500	53357500	101	2p16.2	101	S4(2)	0	0	0		0
chr14	45038500	45139500	101	14q21.2	101	S4(2)	0	0	0		0
chr14	85039500	85139500	100	14q31.3	100	S4(2)	0	0	0		0
chr6	29197500	29296500	99	6p22.1	99	S4(2)	0	0	0		0
chr1	143392500	143489500	97	1q21.1	97	S4(2)	0	0	0		0
chr18	58315500	58411500	96	18q21.32	96	S4(2)	0	0	0		0
chrX	34336500	34430500	94	Xp21.1	94	S4(2)	0	0	0		0
chr5	107433500	107527500	94	5q21.3	94	S4(2)	0	0	0	FBXL17	0
chr3	147816500	147908500	92	3q24	92	S4(2)	0	0	0		0
chr10	68676500	68767500	91	10q21.3	91	S4(2)	0	0	0	CTNNA3	0
chr14	46063500	46153500	90	14q21.2	90	S4(2)	0.001	0	0		0
chrX	85029500	85117500	88	Xq21.2	88	S4(2)	0	0	0		0
chr13	72555500	72642500	87	13q21.33	87	S4(2)	0	0	0		0
chr1	107894500	107976500	82	1p13.3	82	S4(2)	0.016	0.146	225		0
chr4	176505500	176586500	81	4q34.2	81	S4(2)	0	0	0		0
chr6	78943500	79022500	79	6q14.1	79	S4(2)	0	0	0		0
chr4	69489500	69565500	76	4q13.2	76	S4(2)	0	0	0		0
chr7	97321500	97393500	72	7q21.3	72	S4(2)	0	0	0		0
chr9	69810500	69980500	170	9q21.11	71	S4(2)	0	0	0		0
chr3	81151500	81221500	70	3p12.2	70	S4(2)	0	0	0		0
chr21	22752500	22821500	69	21q21.1	69	S4(2)	0.132	1	555	NCAM2	0
chr16	46413500	46482500	69	16q11.2	69	S4(2)	0.001	0.058	4		0
chrX	23107500	23176500	69	Xp22.11	69	S4(2)	0	0	0	RP11-40F8.2	0
chr2	21616500	21682500	66	2p24.1	66	S4(2)	0	0	0	AC067959.1	0
chr8	66216500	66282500	66	8q13.1	66	S4(2)	0	0	0		0
chr19	23566500	23631500	65	19p12	65	S4(2)	0	0	0		0
chr18	15341500	15427500	86	18p11.1-21	65	S4(2)	0	0	0		0
chr16	60223500	60285500	62	16q21	62	S4(2)	0.002	0	0		0
chr14	62962500	63023500	61	14q23.2	61	S4(2)	0	0	0		0
chr2	143097500	143157500	60	2q22.2	60	S4(2)	0	0	0		0
chrX	6160500	6219500	59	Xp22.31	59	S4(2)	0	0	0		0
chr2	79912500	79970500	58	2p12	58	S4(2)	0	0	0	CTNNA2	0
chr10	19936500	19994500	58	10p12.31	58	S4(2)	0	0	0	C10orf112	0
chr1	233899500	233956500	57	1q42.2	57	S4(2)	0	0	0		0
chr8	46910500	46965500	55	8q11.1	55	S4(2)	0	0	0		0
chr14	84985500	85039500	54	14q31.3	54	S4(2)	0	0	0		0
chr4	189852500	189905500	53	4q35.2	53	S4(2)	0.001	0	0		0
chrX	117015500	117068500	53	Xq24	53	S4(2)	0	0	0		0
chr9	120761500	120814500	53	9q33.1	53	S4(2)	0.001	0	0		0
chr5	109565500	109618500	53	5q21-22	53	S4(2)	0	0	0		0
chr21	22821500	22873500	52	21q21.1	52	S4(2)	0.132	1	555	NCAM2	0
chr4	82593500	82644500	51	4q21.22	51	S4(2)	0	0	0	RASGEF1B	0
chr3	63062500	63113500	51	3p14.2	51	S4(2)	0	0	0		0
chr6	55218500	55269500	51	6p12.1	51	S4(2)	0	0	0		0
chrX	136264500	136314500	50	Xq26.3	50	S4(2)	0	0	0		0
chr6	77674500	77724500	50	6q14.1	50	S4(2)	0	0	0		0
chr15	27554500	27604500	50	15q12	50	S4(2)	0	0	0	GABRG3	0
chr21	23007500	23057500	50	21q21.1	50	S4(2)	0	0	0		0
chrX	34286500	34336500	50	Xp21.1	50	S4(2)	0	0	0		0
chr2	153943500	153993500	50	2q23.3	50	S4(2)	0.001	0	0		0
chrX	72523500	72572500	49	Xq13.2	49	S4(2)	0	0	0		0
chr5	129084500	129133500	49	5q23.3	49	S4(2)	0	0	0		0
chr4	69440500	69489500	49	4q13.2	49	S4(2)	0	0	0		0
chr18	36623500	36671500	48	18q12.2	48	S4(2)	0	0	0		0
chr7	12439500	12487500	48	7p21.3	48	S4(2)	0	0	0		0
chr2	21682500	21729500	47	2p24.1	47	S4(2)	0	0	0	AC067959.1	0
chr2	212949500	212996500	47	2q34	47	S4(2)	0	0	0	ERBB4	0
chr18	25138500	25184500	46	18q12.1	46	S4(2)	0	0	0		0
chr12	85487500	85533500	46	12q21.31	46	S4(2)	0	0	0		0
chr7	97393500	97438500	45	7q21.3	45	S4(2)	0	0	0		0
chr18	39870500	39914500	44	18q12.3	44	S4(2)	0.018	0.705	162	LINC00907	0
chr3	67384500	67428500	44	3p14.1	44	S4(2)	0	0	0		0
chr5	7117500	7161500	44	5p15.31	44	S4(2)	0	0	0		0
chr13	84372500	84415500	43	13q31.1	43	S4(2)	0.001	0	0		0
chr8	89237500	89280500	43	8q21.3	43	S4(2)	0.001	0	0		0
chr2	103342500	103385500	43	2q12.1	43	S4(2)	0.028	0.767	108		0
chrX	136314500	136356500	42	Xq26.3	42	S4(2)	0	0	0		0
chr6	123029500	123071500	42	6q22.31	42	S4(2)	0	0	0		0
chr2	57723500	57765500	42	2p16.1	42	S4(2)	0	0	0		0
chrX	107944500	107986500	42	Xq22.3	42	S4(2)	0	0	0		0
chr11	84877500	84919500	42	11q14.1	42	S4(2)	0	0	0	DLG2	0
chr11	79835500	79876500	41	11q14.1	41	S4(2)	0	0	0		0
chrX	140925500	140965500	40	Xq27.2	40	S4(2)	0.003	0	0		0
chr3	61147500	61185500	38	3p14.2	38	S4(2)	0	0	0	FHIT	0
chr13	79019500	79056500	37	13q31.1	37	S4(2)	0	0	0	RNF219-AS1	0
chr12	34650500	34687500	37	12p11.1	37	S4(2)	0	0	0		0
chr7	113656500	113692500	36	7q31.1	36	S4(2)	0	0	0		0
chrX	113722500	113758500	36	Xq23	36	S4(2)	0	0	0		0
chr6	77639500	77674500	35	6q14.1	35	S4(2)	0.002	0	0		0
chr1	107976500	108011500	35	1p13.3	35	S4(2)	0.008	0	0		0
chr10	68642500	68676500	34	10q21.3	34	S4(2)	0	0	0	CTNNA3	0
chr10	19086500	19120500	34	10p12.31	34	S4(2)	0	0	0		0
chrX	72414500	72447500	33	Xq13.2	33	S4(2)	0.005	0.091	3		0
chr11	42156500	42187500	31	11p12	31	S4(2)	0	0	0		0
chrX	104855500	104883500	28	Xq22.3	28	S4(2)	0	0	0	IL1RAPL2	0
chr18	14488500	14514500	26	18p11.21	26	S4(2)	0	0	0		0
chr15	21939500	21956500	17	15q11.2	17	S4(2)	0	0	0		0
chr8	162500	1481500	1319	8p23.3	1319	S4(2.1)	0.019	0.103	68		0
chr3	108475500	109666500	1191	3q13.13	1191	S4(2.1)	0.002	0	0		0
chr16	78947500	80034500	1087	16q23.1-2	1087	S4(2.1)	0.003	0.004	568	WWOX	0
chr16	48823500	49772500	949	16q12.1	949	S4(2.1)	0	0.004	4		0
chr1	174955500	175900500	945	1q25.1	945	S4(2.1)	0.015	0.039	841	RABGAP1L	0
chr5	116705500	117647500	942	5q23.1	942	S4(2.1)	0	0	0		0
chr13	112098500	113037500	939	13q34	825	S4(2.1)	0	0	0		0
chr2	6900500	7724500	824	2p25.1-2	824	S4(2.1)	0	0	0		0
chr19	28485500	29303500	818	19q11-12	818	S4(2.1)	0	0	0		0
chr6	168031500	168844500	813	6q27	813	S4(2.1)	0.133	0.187	152		0
chr13	19230500	20037500	807	13q11-12	807	S4(2.1)	0.001	0.016	13		0
chr18	76396500	77168500	772	18q23	772	S4(2.1)	0.244	0.44	327		0
chr6	25507500	26242500	735	6p22.2	735	S4(2.1)	0.309	0.464	347		0
chr2	544500	1271500	727	2p25.3	727	S4(2.1)	0.065	0.477	420		0
chr7	82578500	83301500	723	7q21.11	723	S4(2.1)	0	0	0		0
chr11	23404500	24121500	717	11p14.3	717	S4(2.1)	0.001	0	0		0
chrX	22429500	23107500	678	Xp22.11	678	S4(2.1)	0.001	0.006	4	RP11-40F8.2	0
chr14	56953500	57620500	667	14q22.3	667	S4(2.1)	0.06	0.177	118		0
chr6	160660500	161299500	639	6q25-26	639	S4(2.1)	0	0	0		0
chr10	42766500	43403500	637	10q11.21	637	S4(2.1)	0.085	0.122	55		0
chr5	89484500	90110500	626	5q14.3	626	S4(2.1)	0.011	0.144	60	GPR98	0
chr11	115214500	115824500	610	11q23.3	610	S4(2.1)	0	0	0		0
chr2	106609500	107295500	686	2q12.2	601	S4(2.1)	0.001	0.006	4		0
chr20	20467500	21065500	598	20p11.23	598	S4(2.1)	0	0	0		0
chr10	110058500	110638500	580	10q25.1	580	S4(2.1)	0	0	0		0
chr4	188526500	189105500	579	4q35.2	579	S4(2.1)	0.002	0.005	3		0
chr4	154811500	155388500	577	4q31.3	577	S4(2.1)	0	0	0		0
chr9	106647500	107215500	568	9q31.1	568	S4(2.1)	0.054	0.12	68		0
chrX	104287500	104855500	568	Xq22.3	568	S4(2.1)	0	0	0	IL1RAPL2	0
chr1	166694500	167261500	567	1q24.1-2	567	S4(2.1)	0.15	0.198	214		0
chr6	167132500	167693500	561	6q27	561	S4(2.1)	0.082	0.15	80		0
chr4	186534500	187082500	548	4q35.1	548	S4(2.1)	0.002	0.031	17		0
chr9	92176500	92903500	727	9q22.2	548	S4(2.1)	0	0	0		0
chrX	74046500	74593500	547	Xq13.3	547	S4(2.1)	0.038	0.179	98		0
chr7	113692500	114234500	542	7q31.1	542	S4(2.1)	0.002	0	0	FOXP2	0
chr18	1566500	2093500	527	18p11.32	527	S4(2.1)	0	0	0		0
chr14	88210500	88724500	514	14q31.3	514	S4(2.1)	0.001	0.014	4		0
chr6	6077500	6589500	512	6p25.1	512	S4(2.1)	0	0	0		0
chr3	153415500	153924500	509	3q25.2	509	S4(2.1)	0.003	0.169	145	RP11-23D24.2	0
chr20	15869500	16374500	505	20p12.1	505	S4(2.1)	0	0	0	MACROD2	0
chr1	181551500	182052500	501	1q25.3	501	S4(2.1)	0	0	0		0
chr11	114627500	115127500	500	11q23.3	500	S4(2.1)	0	0	0		0
chr1	60774500	61271500	497	1p32.1	497	S4(2.1)	0	0	0		0
chr2	2490500	2985500	495	2p25.3	495	S4(2.1)	0	0.006	3		0
chr10	1462500	1952500	490	10p15.3	490	S4(2.1)	0	0	0	ADARB2	0
chr4	18148500	18638500	490	4p15.31	490	S4(2.1)	0	0	0		0
chr6	23120500	23609500	489	6p22.3	489	S4(2.1)	0	0	0		0
chr5	145990500	146470500	480	5q32	480	S4(2.1)	0	0	0		0
chr1	174475500	174955500	480	1q25.1	480	S4(2.1)	0.426	1	841	RABGAP1L	0
chr2	198829500	199304500	475	2q33.1	475	S4(2.1)	0.001	0	0		0
chr9	109026500	109466500	440	9q31.2	440	S4(2.1)	0.002	0	0		0
chr19	57106500	57544500	438	19q13.43	438	S4(2.1)	0.06	0.132	48		0
chr2	15555500	15987500	432	2p24.3	432	S4(2.1)	0.22	0.144	62		0
chr21	41116500	41545500	429	21q22.2	429	S4(2.1)	0.002	0.007	3	DSCAM	0
chr7	87456500	87885500	429	7q21.12	429	S4(2.1)	0.095	0.107	207		0
chrX	79936500	80364500	428	Xq21.1	428	S4(2.1)	0.005	0.03	10		0
chr13	107304500	107732500	428	13q33.3	428	S4(2.1)	0	0	0		0
chr2	1998500	2425500	427	2p25.3	427	S4(2.1)	0	0	0	MYT1L	0
chr17	68125500	68549500	424	17q24.3	424	S4(2.1)	0.001	0	0		0
chr3	192938500	193360500	422	3q29	422	S4(2.1)	0.171	0.121	133		0
chr15	25298500	25715500	417	15q11-12	417	S4(2.1)	0.099	0.312	196		0
chr9	122462500	122860500	398	9q33.1-2	398	S4(2.1)	0	0	0		0
chr10	122433500	122831500	398	10q26.12	398	S4(2.1)	0.191	0.525	215		0
chr7	141439500	141832500	393	7q34	393	S4(2.1)	0.075	0.148	54		0
chr13	23263500	23655500	392	13q12.11-12	392	S4(2.1)	0	0	0		0
chr3	147908500	148300500	392	3q24	392	S4(2.1)	0	0	0		0
chr1	48149500	48534500	385	1p33	385	S4(2.1)	0	0	0		0
chr7	71543500	71927500	384	7q11.22	384	S4(2.1)	0	0	0	CALN1	0
chr18	70341500	70724500	383	18q22.3	383	S4(2.1)	0.001	0	0		0
chrX	49396500	49778500	382	Xp11.23	382	S4(2.1)	0.036	0.262	186		0
chr18	35002500	35384500	382	18q12.2	382	S4(2.1)	0	0	0		0
chr14	86214500	86593500	379	14q31.3	379	S4(2.1)	0	0	0		0
chr14	86684500	87062500	378	14q31.3	378	S4(2.1)	0.001	0	0		0
chr12	75055500	75431500	376	12q21.1	376	S4(2.1)	0	0	0		0
chr4	12985500	13358500	373	4p15.33	373	S4(2.1)	0	0.011	4		0
chr9	78331500	78695500	364	9q21.13	364	S4(2.1)	0.001	0	0		0
chr10	8260500	8622500	362	10p14	362	S4(2.1)	0	0	0		0
chr8	21153500	21508500	355	8p21.3	355	S4(2.1)	0	0	0		0
chr8	135956500	136307500	351	8q24.22	351	S4(2.1)	0	0	0		0
chr9	83523500	83874500	351	9q21.31	351	S4(2.1)	0	0	0		0
chr3	145266500	145612500	346	3q24	346	S4(2.1)	0	0	0		0
chr18	27076500	27415500	339	18q12.1	339	S4(2.1)	0	0	0		0
chr10	2519500	2857500	338	10p15.3	338	S4(2.1)	0	0	0		0
chr18	1177500	1513500	336	18p11.32	336	S4(2.1)	0	0	0		0
chr1	166063500	166395500	332	1q24.1	332	S4(2.1)	0	0	0		0
chr1	176141500	176470500	329	1q25.2	329	S4(2.1)	0.004	0.036	12		0
chr9	119690500	120014500	324	9q33.1	324	S4(2.1)	0.001	0	0	ASTN2	0
chr15	93715500	94037500	322	15q26.1	322	S4(2.1)	0	0	0		0
chr1	5506500	5825500	319	1p36.31	319	S4(2.1)	0	0	0		0
chr11	97655500	97973500	318	11q22.1	318	S4(2.1)	0	0	0		0
chr6	24164500	24479500	315	6p22.3	315	S4(2.1)	0.054	0.14	44		0
chrX	150309500	150623500	314	Xq28	314	S4(2.1)	0.072	0.169	53		0
chr1	80375500	80685500	310	1p31.1	310	S4(2.1)	0	0	0		0
chr7	152526500	152833500	307	7q36.1-2	307	S4(2.1)	0.102	0.358	181		0
chr6	89349500	89653500	304	6q15	304	S4(2.1)	0.001	0	0		0
chr8	73537500	73834500	297	8q13.3	297	S4(2.1)	0	0	0		0
chr4	21006500	21303500	297	4p15.2-31	297	S4(2.1)	0	0	0	KCNIP4	0
chr16	26504500	26801500	297	16p12.1	297	S4(2.1)	0	0	0		0
chr20	41545500	41841500	296	20q12-13	296	S4(2.1)	0	0	0	PTPRT	0
chr12	98321500	98617500	296	12q23.1	296	S4(2.1)	0	0	0		0
chr8	132446500	132742500	296	8q24.22	296	S4(2.1)	0	0	0		0
chr7	85365500	85659500	294	7q21.11	294	S4(2.1)	0	0	0		0
chr14	83777500	84063500	286	14q31.2	286	S4(2.1)	0	0	0		0
chrX	154909500	155192500	283	Xq28	283	S4(2.1)	0.005	0.074	90		0
chr7	66997500	67279500	282	7q11.21-22	282	S4(2.1)	0	0	0		0
chr5	156111500	156392500	281	5q33.3	281	S4(2.1)	0.136	0.345	456	SGCD	0
chr3	22624500	22904500	280	3p24.3	280	S4(2.1)	0	0	0		0
chr14	99334500	99613500	279	14q32.2	279	S4(2.1)	0	0	0		0
chr9	120052500	120326500	274	9q33.1	274	S4(2.1)	0	0	0	ASTN2	0
chr14	78543500	78814500	271	14q24.3	271	S4(2.1)	0	0	0	NRXN3	0
chr2	205758500	206028500	270	2q33.3	270	S4(2.1)	0.702	1	1109	PARD3B	0
chr9	27331500	27598500	267	9p21.2	267	S4(2.1)	0	0	0		0
chr6	119940500	120204500	264	6q22.31	264	S4(2.1)	0.005	0	0		0
chr20	38842500	39099500	257	20q12	257	S4(2.1)	0	0	0		0
chr13	94141500	94395500	254	13q31.3	254	S4(2.1)	0	0	0	GPC6	0
chr2	209230500	209478500	248	2q34	248	S4(2.1)	0.002	0.012	103		0
chr15	97164500	97408500	244	15q26.2	244	S4(2.1)	0	0	0		0
chr6	161861500	162103500	242	6q26	242	S4(2.1)	0	0	0	PARK2	0
chr5	17586500	17827500	241	5p15.1	241	S4(2.1)	0	0	0		0
chrX	132957500	133197500	240	Xq26.2	240	S4(2.1)	0	0	0		0
chr16	63859500	64098500	239	16q21	239	S4(2.1)	0	0	0		0
chr3	87520500	87754500	234	3p11.2	234	S4(2.1)	0	0	0		0
chr7	154547500	154780500	233	7q36.2	233	S4(2.1)	0.017	0.155	23	DPP6	0
chr10	9321500	9550500	229	10p14	229	S4(2.1)	0	0	0		0
chr16	77024500	77252500	228	16q23.1	228	S4(2.1)	0.081	0.127	31		0
chr14	62701500	62925500	224	14q23.2	224	S4(2.1)	0	0	0		0
chr6	168991500	169214500	223	6q27	223	S4(2.1)	0	0	0		0
chr6	97263500	97483500	220	6q16.1	220	S4(2.1)	0.001	0.018	4		0
chr2	80436500	80652500	216	2p12	216	S4(2.1)	0	0	0	CTNNA2	0
chr7	109742500	109952500	210	7q31.1	210	S4(2.1)	0	0	0		0
chr11	4451500	4660500	209	11p15.4	209	S4(2.1)	0	0	0		0
chr4	105714500	105922500	208	4q24	208	S4(2.1)	0.001	0	0		0
chr4	10716500	10924500	208	4p16.1	208	S4(2.1)	0	0	0		0
chr6	166555500	166762500	207	6q27	207	S4(2.1)	0.002	0.039	10		0
chr2	14361500	14566500	205	2p24.3	205	S4(2.1)	0	0	0	LINC00276	0
chr13	86190500	86395500	205	13q31.1	205	S4(2.1)	0	0	0		0
chr6	29353500	29557500	204	6p22.1	204	S4(2.1)	0	0	0		0
chr10	118193500	118395500	202	10q25.3	202	S4(2.1)	0	0	0		0
chr7	95180500	95382500	202	7q21.3	202	S4(2.1)	0	0	0		0
chr10	68325500	68524500	199	10q21.3	199	S4(2.1)	0	0	0	CTNNA3	0
chr2	137967500	138166500	199	2q22.1	199	S4(2.1)	0.002	0	0	THSD7B	0
chr1	95925500	96123500	198	1p21.3	198	S4(2.1)	0	0	0		0
chr1	96380500	96578500	198	1p21.3	198	S4(2.1)	0	0	0		0
chr8	115897500	116093500	196	8q23.3	196	S4(2.1)	0.001	0	0		0
chr4	61195500	61389500	194	4q13.1	194	S4(2.1)	0	0	0		0
chr18	24248500	24441500	193	18q11.2	193	S4(2.1)	0	0	0	AQP4-AS1	0
chr6	163128500	163320500	192	6q26	192	S4(2.1)	0.002	0	0	PACRG,PARK2	0
chrX	101054500	101246500	192	Xq22.1	192	S4(2.1)	0	0	0		0
chr4	33439500	33630500	191	4p15.1	191	S4(2.1)	0	0	0		0
chr5	50516500	50705500	189	5q11.1-2	189	S4(2.1)	0	0	0		0
chr18	40981500	41169500	188	18q12.3	188	S4(2.1)	0	0	0		0
chr13	66643500	66831500	188	13q21.32	188	S4(2.1)	0	0	0		0
chr11	37702500	37887500	185	11p12	185	S4(2.1)	0	0	0		0
chr2	115072500	115257500	185	2q14.1	185	S4(2.1)	0	0	0	DPP10	0
chr17	68943500	69127500	184	17q24.3	184	S4(2.1)	0.001	0	0		0
chr12	18203500	18386500	183	12p12.3	183	S4(2.1)	0	0	0		0
chr12	103285500	103466500	181	12q23.2	181	S4(2.1)	0.003	0	0		0
chr18	6329500	6509500	180	18p11.31	180	S4(2.1)	0	0	0		0
chrX	75182500	75361500	179	Xq13.3	179	S4(2.1)	0	0	0		0
chr2	95410500	95587500	177	2q11.1	177	S4(2.1)	0.002	0.017	3		0
chr2	142870500	143047500	177	2q22.2	177	S4(2.1)	0	0	0	LRP1B	0
chr8	132173500	132348500	175	8q24.22	175	S4(2.1)	0	0	0		0
chr13	67702500	67875500	173	13q21.32	173	S4(2.1)	0.001	0	0	PCDH9	0
chr4	162932500	163102500	170	4q32.2	170	S4(2.1)	0	0	0	FSTL5	0
chr12	97609500	97778500	169	12q23.1	169	S4(2.1)	0	0	0		0
chr4	187263500	187432500	169	4q35.2	169	S4(2.1)	0	0	0		0
chr12	16507500	16674500	167	12p12.3	167	S4(2.1)	0.41	1	245		0
chr3	25951500	26118500	167	3p24.2	167	S4(2.1)	0	0	0		0
chr11	84425500	84590500	165	11q14.1	165	S4(2.1)	0	0	0	DLG2	0
chr2	48981500	49144500	163	2p16.3	163	S4(2.1)	0	0	0		0
chr9	68368500	68527500	159	9q13	159	S4(2.1)	0.087	0.145	23		0
chr14	87609500	87766500	157	14q31.3	157	S4(2.1)	0	0	0		0
chr4	42219500	42374500	155	4p13	155	S4(2.1)	0	0	0		0
chrX	108444500	108598500	154	Xq22.3	154	S4(2.1)	0	0	0		0
chr22	17228500	17380500	152	22q11.1	152	S4(2.1)	0	0	0		0
chr4	137790500	137942500	152	4q28.3	152	S4(2.1)	0	0	0		0
chr10	21099500	21249500	150	10p12.31	150	S4(2.1)	0	0	0		0
chr2	107775500	107924500	149	2q12.3	149	S4(2.1)	0	0	0		0
chr7	121850500	121996500	146	7q31.32	146	S4(2.1)	0.001	0	0	CADPS2	0
chrX	123513500	123658500	145	Xq25	145	S4(2.1)	0	0	0	TENM1	0
chr14	84843500	84985500	142	14q31.2-3	142	S4(2.1)	0	0	0		0
chrX	51962500	52104500	142	Xp11.22	142	S4(2.1)	0.001	0	0		0
chrX	58249500	58390500	141	Xp11.1	141	S4(2.1)	0	0	0		0
chr7	143858500	144161500	303	7q35	140	S4(2.1)	0.003	0.053	16		0
chr2	76336500	76472500	136	2p12	136	S4(2.1)	0	0	0		0
chr18	4146500	4281500	135	18p11.31	135	S4(2.1)	0	0	0	DLGAP1	0
chr2	108103500	108237500	134	2q12.3	134	S4(2.1)	0	0	0		0
chr5	51538500	51671500	133	5q11.2	133	S4(2.1)	0	0	0		0
chr12	62339500	62471500	132	12q14.1	132	S4(2.1)	0	0	0	FAM19A2	0
chrX	128163500	128290500	127	Xq25	127	S4(2.1)	0	0	0		0
chr7	112940500	113064500	124	7q31.1	124	S4(2.1)	0	0	0		0
chr7	108300500	108423500	123	7q31.1	123	S4(2.1)	0	0	0		0
chr4	189730500	189852500	122	4q35.2	122	S4(2.1)	0	0	0		0
chr2	193245500	193365500	120	2q32.3	120	S4(2.1)	0	0	0		0
chrX	95337500	95454500	117	Xq21.33	117	S4(2.1)	0	0	0		0
chrX	110309500	110425500	116	Xq23	116	S4(2.1)	0.001	0	0		0
chr4	82477500	82593500	116	4q21.22	116	S4(2.1)	0	0	0	RASGEF1B	0
chr14	84105500	84218500	113	14q31.2	113	S4(2.1)	0	0	0		0
chr15	53410500	53522500	112	15q21.3	112	S4(2.1)	0	0	0		0
chr16	47348500	47459500	111	16q12.1	111	S4(2.1)	0.001	0	0		0
chrX	20888500	20992500	104	Xp22.12	104	S4(2.1)	0	0	0		0
chr2	142272500	142375500	103	2q22.2	103	S4(2.1)	0	0	0	LRP1B	0.005	1		1
chrX	103974500	104074500	100	Xq22.3	100	S4(2.1)	0	0	0	IL1RAPL2	0
chr8	79136500	79234500	98	8q21.12	98	S4(2.1)	0	0	0		0
chr6	20799500	20888500	89	6p22.3	89	S4(2.1)	0.596	1	724	CDKAL1	0
chr11	91695500	91783500	88	11q14.3	88	S4(2.1)	0	0	0		0
chr3	78738500	78826500	88	3p12.3	88	S4(2.1)	0.001	0	0	ROBO1	0
chr2	57565500	57653500	88	2p16.1	88	S4(2.1)	0.001	0	0		0
chr8	87213500	87299500	86	8q21.3	86	S4(2.1)	0	0	0		0
chr19	20996500	21081500	85	19p12	85	S4(2.1)	0.018	0.094	47		0
chr12	39863500	39947500	84	12q12	84	S4(2.1)	0	0	0		0
chrX	115918500	116001500	83	Xq23	83	S4(2.1)	0.002	0	0		0
chr4	145315500	145397500	82	4q31.21	82	S4(2.1)	0	0	0		0
chr10	42419500	42500500	81	10q11.21	81	S4(2.1)	0	0	0		0
chrX	107864500	107944500	80	Xq22.3	80	S4(2.1)	0.001	0	0		0
chr2	209941500	210020500	79	2q34	79	S4(2.1)	0	0	0		0
chr4	94794500	94873500	79	4q22.2	79	S4(2.1)	0	0	0		0
chr6	77486500	77564500	78	6q14.1	78	S4(2.1)	0	0	0		0
chrX	56479500	56557500	78	Xp11.21	78	S4(2.1)	0.007	0	0		0
chr6	77564500	77639500	75	6q14.1	75	S4(2.1)	0	0	0		0
chr18	37204500	37279500	75	18q12.3	75	S4(2.1)	0	0	0	LINC00669	0
chr8	15211500	15283500	72	8p22	72	S4(2.1)	0	0	0		0
chrX	130168500	130240500	72	Xq26.1	72	S4(2.1)	0	0	0		0
chr5	105785500	105856500	71	5q21.3	71	S4(2.1)	0	0	0		0
chr4	168652500	168722500	70	4q32.3	70	S4(2.1)	0	0	0		0
chr8	52152500	52221500	69	8q11.21-22	69	S4(2.1)	0	0	0		0
chr8	104948500	105017500	69	8q22.3	69	S4(2.1)	0.221	1	758	RIMS2	0
chrX	140965500	141033500	68	Xq27.2	68	S4(2.1)	0.001	0	0		0
chr8	89328500	89395500	67	8q21.3	67	S4(2.1)	0.064	0.851	396		0
chr1	143489500	143556500	67	1q21.1	67	S4(2.1)	0	0	0		0
chr11	16435500	16500500	65	11p15.1	65	S4(2.1)	0	0	0	SOX6	0
chr2	153879500	153943500	64	2q23.3	64	S4(2.1)	0.003	0	0		0
chr13	78486500	78550500	64	13q22.3	64	S4(2.1)	0	0	0	RNF219-AS1	0
chr3	67428500	67488500	60	3p14.1	60	S4(2.1)	0	0	0		0
chr2	132911500	132970500	59	2q21.2	59	S4(2.1)	0	0	0		0
chrX	51263500	51337500	74	Xp11.22	58	S4(2.1)	0	0	0		0
chr4	150080500	150137500	57	4q31.23	57	S4(2.1)	0	0	0		0
chr1	107225500	107278500	53	1p13.3	53	S4(2.1)	0	0	0		0
chrX	120410500	120460500	50	Xq24	50	S4(2.1)	0.001	0	0		0
chr4	167072500	167122500	50	4q32.3	50	S4(2.1)	0.002	0	0		0
chrX	94303500	94353500	50	Xq21.33	50	S4(2.1)	0	0	0		0
chr8	5605500	5654500	49	8p23.2	49	S4(2.1)	0	0	0		0
chr18	39821500	39870500	49	18q12.3	49	S4(2.1)	0.024	1	162	LINC00907	0
chr8	5556500	5605500	49	8p23.2	49	S4(2.1)	0	0	0		0
chr8	89280500	89328500	48	8q21.3	48	S4(2.1)	0	0	0		0
chrX	66178500	66223500	45	Xq12	45	S4(2.1)	0	0	0		0
chr12	39947500	39991500	44	12q12	44	S4(2.1)	0	0	0		0
chrX	35232500	35276500	44	Xp21.1	44	S4(2.1)	0	0	0		0
chr3	147417500	147460500	43	3q24	43	S4(2.1)	0	0	0		0
chr14	84063500	84105500	42	14q31.2	42	S4(2.1)	0	0	0		0
chr4	167030500	167072500	42	4q32.3	42	S4(2.1)	0.001	0	0		0
chrX	63315500	63357500	42	Xq11.2	42	S4(2.1)	0	0	0		0
chr12	85447500	85487500	40	12q21.31	40	S4(2.1)	0.002	0	0		0
chrX	42234500	42274500	40	Xp11.4	40	S4(2.1)	0	0	0		0
chr17	21515500	21554500	39	17p11.2	39	S4(2.1)	0	0	0		0
chr10	69161500	69200500	39	10q21.3	39	S4(2.1)	0	0	0	CTNNA3	0
chr9	120723500	120761500	38	9q33.1	38	S4(2.1)	0.001	0	0		0
chr11	37665500	37702500	37	11p12	37	S4(2.1)	0	0	0		0
chrX	64083500	64120500	37	Xq11.2	37	S4(2.1)	0	0	0		0
chr5	8242500	8278500	36	5p15.31	36	S4(2.1)	0	0	0		0
chrX	140890500	140925500	35	Xq27.2	35	S4(2.1)	0.003	0	0		0
chrX	99479500	99507500	28	Xq22.1	28	S4(2.1)	0	0	0		0
chrX	74640500	74668500	28	Xq13.3	28	S4(2.1)	0	0	0		0
chr10	110040500	110058500	18	10q25.1	18	S4(2.1)	0	0	0		0
chr17	22280500	22281500	1	17p11.1	1	S4(2.1)	0	0	0		0
chr22	47868500	49889500	2021	22q13.31-33	2021	S4(2.2)	0.001	0.004	5		0
chr19	30247500	31362500	1115	19q12	1115	S4(2.2)	0.182	0.126	100		0
chr22	34158500	35191500	1033	22q12.3	1033	S4(2.2)	0	0	0	LARGE	0
chr6	26643500	27785500	1142	6p22.1-2	1013	S4(2.2)	0.019	0.124	47		0
chr1	194432500	195390500	958	1q31.3	958	S4(2.2)	0	0	0		0
chr7	155520500	156470500	950	7q36.3	950	S4(2.2)	0.129	0.101	160		0
chr11	112539500	113487500	948	11q23.2	948	S4(2.2)	0.029	0.078	74		0
chr2	118957500	119852500	895	2q14.2	895	S4(2.2)	0	0	0		0
chr20	58851500	59704500	853	20q13.33	853	S4(2.2)	0	0	0		0
chr7	14906500	15751500	845	7p21.2	845	S4(2.2)	0	0	0	DGKB	0
chr14	36480500	37304500	824	14q13.2-3	824	S4(2.2)	0	0	0		0
chr2	215040500	215855500	815	2q34-35	815	S4(2.2)	0.024	0.275	396	SPAG16	0
chr15	94711500	95520500	809	15q26.2	809	S4(2.2)	0.016	0.324	250		0
chr1	217404500	218205500	801	1q41	801	S4(2.2)	0.003	0	0		0
chr1	176753500	177522500	769	1q25.2	769	S4(2.2)	0	0	0		0
chr17	71695500	72453500	758	17q25.1	758	S4(2.2)	0.069	0.091	49		0
chr19	21081500	21838500	757	19p12	757	S4(2.2)	0.239	0.531	74		0
chr2	14617500	15346500	729	2p24.3	729	S4(2.2)	0.002	0.032	19		0
chr2	222281500	222995500	714	2q36.1	714	S4(2.2)	0.002	0.018	9		0
chr3	116558500	117271500	713	3q13.31	713	S4(2.2)	0	0	0	LSAMP	0
chr16	13066500	13772500	706	16p13.12	706	S4(2.2)	0	0.006	4		0
chr1	90903500	91600500	697	1p22.2	697	S4(2.2)	0	0	0		0
chr7	95518500	96212500	694	7q21.3	694	S4(2.2)	0.001	0.012	8		0
chr19	32093500	32776500	683	19q12-13	683	S4(2.2)	0	0	0		0
chr1	213472500	214149500	677	1q32.3	677	S4(2.2)	0.003	0.041	277		0
chr9	14190500	14866500	676	9p22-23	676	S4(2.2)	0	0	0		0
chr1	242330500	242999500	669	1q43	669	S4(2.2)	0	0	0		0
chr3	53969500	54630500	661	3p14-21	661	S4(2.2)	0	0	0	CACNA2D3	0
chr11	104020500	104674500	654	11q22.3	654	S4(2.2)	0.001	0	0		0
chr6	39926500	40578500	652	6p21.1-2	652	S4(2.2)	0	0	0		0
chr7	157590500	158238500	648	7q36.3	648	S4(2.2)	0	0.009	6	PTPRN2	0
chr18	29296500	29936500	640	18q12.1	640	S4(2.2)	0.092	0.098	55		0
chr8	127040500	127678500	638	8q24.13-21	638	S4(2.2)	0	0	0		0
chr18	13299500	13936500	637	18p11.21	637	S4(2.2)	0.068	0.064	41		0
chr5	5063500	5677500	614	5p15.32	614	S4(2.2)	0.2	0.435	184		0
chr7	135858500	136467500	609	7q33	609	S4(2.2)	0.001	0	0		0
chr16	73516500	74120500	604	16q22-23	604	S4(2.2)	0	0	0		0
chr3	28140500	28739500	599	3p24.1	599	S4(2.2)	0.129	0.546	218		0
chr20	6189500	6784500	595	20p12.3	595	S4(2.2)	0.003	0.007	4		0
chr8	133042500	133633500	591	8q24.22	591	S4(2.2)	0.001	0.036	21		0
chr3	134710500	135296500	586	3q22.2	586	S4(2.2)	0.015	0.478	674	EPHB1	0
chrX	56608500	57186500	578	Xp11.21	578	S4(2.2)	0.146	0.363	149		0
chrX	54932500	55537500	605	Xp11.21	578	S4(2.2)	0.023	0.116	30		0
chr4	14379500	14955500	576	4p15.33	576	S4(2.2)	0	0	0		0
chr16	20033500	20608500	575	16p12.3	575	S4(2.2)	0	0	0		0
chrX	120460500	121003500	543	Xq24-25	543	S4(2.2)	0.001	0	0		0
chr15	84150500	84693500	543	15q25.2	543	S4(2.2)	0.001	0	0		0
chr3	77636500	78165500	529	3p12.3	529	S4(2.2)	0.011	0.123	614	ROBO2	0
chr10	129335500	129859500	524	10q26.2	524	S4(2.2)	0	0	0		0
chr7	110502500	111022500	520	7q31.1	520	S4(2.2)	0	0	0	IMMP2L	0.098	2		2
chr18	44769500	45284500	515	18q21.1	515	S4(2.2)	0.162	0.641	330		0
chr21	18218500	18731500	513	21q21.1	513	S4(2.2)	0	0	0		0
chr14	22170500	22680500	510	14q11.2	510	S4(2.2)	0	0	0		0
chr6	133207500	133713500	506	6q23.2	506	S4(2.2)	0	0	0		0
chrX	6270500	6770500	500	Xp22.31	500	S4(2.2)	0	0	0		0
chr14	97104500	97601500	497	14q32.2	497	S4(2.2)	0.145	0.378	188		0
chr3	144276500	144772500	496	3q24	496	S4(2.2)	0	0	0		0
chr10	7128500	7623500	495	10p14	495	S4(2.2)	0	0	0		0
chr3	137023500	137516500	493	3q22.3	493	S4(2.2)	0	0	0		0
chr20	38193500	38683500	490	20q12	490	S4(2.2)	0	0	0		0
chr7	64088500	64577500	489	7q11.21	489	S4(2.2)	0.227	0.407	60		0
chr3	93502500	93990500	488	3q11.1-2	488	S4(2.2)	0.175	0.352	88		0
chr13	39182500	39666500	484	13q13.3	484	S4(2.2)	0.026	0.079	38		0
chr15	46353500	46835500	482	15q21.1	482	S4(2.2)	0.004	0	0		0
chr21	32550500	33032500	482	21q22.11	482	S4(2.2)	0.01	0.004	16		0
chr4	80053500	80535500	482	4q21.21	482	S4(2.2)	0.003	0	0		0
chr1	158376500	158855500	479	1q23.1	479	S4(2.2)	0	0.008	4		0
chr4	121113500	121586500	473	4q27	473	S4(2.2)	0.015	0.34	288		0
chr1	14663500	15136500	473	1p36.21	473	S4(2.2)	0.001	0	0	KAZN	0
chr3	24815500	25282500	467	3p24.2	467	S4(2.2)	0	0	0		0
chr5	155263500	155725500	462	5q33.2-3	462	S4(2.2)	0	0	0	SGCD	0
chr13	64585500	65046500	461	13q21.31	461	S4(2.2)	0	0	0		0
chr11	123801500	124257500	456	11q24.1-2	456	S4(2.2)	0	0	0		0
chr2	141823500	142272500	449	2q22.1-2	449	S4(2.2)	0	0	0	LRP1B	0
chr10	117694500	118142500	448	10q25.3	448	S4(2.2)	0	0	0	ATRNL1	0
chr16	77340500	77782500	442	16q23.1	442	S4(2.2)	0.003	0.052	23		0
chr9	85161500	85593500	432	9q21.32	432	S4(2.2)	0.001	0	0		0
chr21	42151500	42576500	425	21q22.2	425	S4(2.2)	0.001	0.009	4	DSCAM	0
chr2	168396500	168820500	424	2q24.3	424	S4(2.2)	0.028	0.8	527		0
chr13	85677500	86100500	423	13q31.1	423	S4(2.2)	0	0	0		0
chr1	233477500	233899500	422	1q42.2	422	S4(2.2)	0.003	0.104	58		0
chr2	148347500	148768500	421	2q22-23	421	S4(2.2)	0.115	0.228	96		0
chr5	174846500	175265500	419	5q35.2	419	S4(2.2)	0.144	0.148	62		0
chr4	9371500	9803500	432	4p16.1	414	S4(2.2)	0.008	0.326	134		0
chr5	7671500	8068500	397	5p15.31	397	S4(2.2)	0.093	0.179	56		0
chr12	127004500	127398500	394	12q24.32	394	S4(2.2)	0	0	0		0
chr20	12768500	13155500	387	20p12.1	387	S4(2.2)	0.001	0.008	3		0
chr11	105319500	105698500	379	11q22.3	379	S4(2.2)	0.001	0	0		0
chr16	51700500	52076500	376	16q12.1	376	S4(2.2)	0	0.008	3		0
chr2	60426500	60796500	370	2p16.1	370	S4(2.2)	0	0	0		0
chr8	53160500	53526500	366	8q11.23	366	S4(2.2)	0	0	0		0
chr6	102365500	102730500	365	6q16.3	365	S4(2.2)	0.864	0.468	680	GRIK2	0
chr7	124245500	124610500	365	7q31.33	365	S4(2.2)	0.001	0	0		0
chr13	79056500	79417500	361	13q31.1	361	S4(2.2)	0	0	0	RNF219-AS1	0
chr8	57933500	58294500	361	8q12.1	361	S4(2.2)	0	0	0		0
chr3	147460500	147816500	356	3q24	356	S4(2.2)	0	0	0		0
chr13	26257500	26612500	355	13q12.13	355	S4(2.2)	0	0	0	ATP8A2	0
chr11	60065500	60419500	354	11q12.2	354	S4(2.2)	0	0	0		0
chr3	161217500	161568500	351	3q26.1	351	S4(2.2)	0	0	0		0
chr19	20112500	20460500	348	19p12	348	S4(2.2)	0.073	0.319	62		0
chr2	164024500	164372500	348	2q24.3	348	S4(2.2)	0	0	0		0
chr8	20388500	20728500	340	8p21.3	340	S4(2.2)	0	0	0		0
chr3	162218500	162558500	340	3q26.1	340	S4(2.2)	0	0	0		0
chr12	128383500	128717500	334	12q24.32	334	S4(2.2)	0	0	0		0
chr7	86471500	86804500	333	7q21.12	333	S4(2.2)	0.179	0.084	62		0
chr4	174635500	174967500	332	4q34.1	332	S4(2.2)	0	0	0		0
chr3	154058500	154390500	332	3q25.2	332	S4(2.2)	0	0	0		0
chr15	26340500	26672500	332	15q12	332	S4(2.2)	0	0	0		0
chrX	68533500	68863500	330	Xq13.1	330	S4(2.2)	0	0	0		0
chr13	76681500	77006500	325	13q22.2	325	S4(2.2)	0	0	0		0
chr10	106477500	106800500	323	10q25.1	323	S4(2.2)	0	0	0	SORCS3	0
chrX	7664500	7985500	321	Xp22.31	321	S4(2.2)	0.009	0.283	439		0
chrX	64120500	64440500	320	Xq11.2	320	S4(2.2)	0.003	0	0		0
chr7	25776500	26096500	320	7p15.2	320	S4(2.2)	0	0	0		0
chr5	166580500	166893500	313	5q34	313	S4(2.2)	0	0	0	TENM2	0
chr13	93456500	93762500	306	13q31.3	306	S4(2.2)	0	0	0	GPC5	0
chr8	54100500	54405500	305	8q11.23	305	S4(2.2)	0	0	0		0
chr8	47653500	47954500	301	8q11.1	301	S4(2.2)	0	0	0		0
chr1	76914500	77213500	299	1p31.1	299	S4(2.2)	0.005	0.01	3	ST6GALNAC3	0
chr13	66888500	67186500	298	13q21.32	298	S4(2.2)	0	0	0	PCDH9	0
chrX	138991500	139285500	294	Xq27.1	294	S4(2.2)	0	0	0		0
chr5	143902500	144192500	290	5q31.3	290	S4(2.2)	0.002	0	0		0
chrX	83564500	83854500	290	Xq21.1	290	S4(2.2)	0	0	0		0
chr5	1907500	2197500	290	5p15.33	290	S4(2.2)	0	0	0		0
chr3	97783500	98069500	286	3q11.2	286	S4(2.2)	0	0	0		0
chr16	59863500	60149500	286	16q21	286	S4(2.2)	0	0	0		0
chr8	31091500	31368500	277	8p12	277	S4(2.2)	0	0	0		0
chr10	131515500	131792500	277	10q26.3	277	S4(2.2)	0.014	0.238	303		0
chr10	112878500	113154500	276	10q25.2	276	S4(2.2)	0	0	0		0
chr12	100038500	100311500	273	12q23.1	273	S4(2.2)	0	0	0	ANKS1B	0.821	3		3
chr2	136898500	137168500	270	2q22.1	270	S4(2.2)	0	0	0		0
chr5	6134500	6401500	267	5p15.31-32	267	S4(2.2)	0.001	0.022	6		0
chr9	1665500	1932500	267	9p24.3	267	S4(2.2)	0	0	0		0
chr10	87657500	87922500	265	10q23.1-2	265	S4(2.2)	0	0	0	GRID1	0
chr2	91924500	92279500	355	2p11.1	265	S4(2.2)	0	0.008	3		0
chr5	152403500	152665500	262	5q33.1	262	S4(2.2)	0	0	0	AC091969.1	0
chr10	129917500	130179500	262	10q26.2	262	S4(2.2)	0	0	0		0
chr11	83348500	83609500	261	11q14.1	261	S4(2.2)	0	0	0	DLG2	0
chrX	8285500	8546500	261	Xp22.31	261	S4(2.2)	0.009	0.184	439		0
chr1	88436500	88695500	259	1p22.2	259	S4(2.2)	0	0	0		0
chr2	164998500	165255500	257	2q24.3	257	S4(2.2)	0	0	0	AC092684.1	0
chr1	216537500	216793500	256	1q41	256	S4(2.2)	0	0	0	ESRRG,USH2A	0
chr3	192159500	192414500	255	3q28-29	255	S4(2.2)	0	0	0	FGF12	0
chr8	136365500	136619500	254	8q24.22-23	254	S4(2.2)	0.338	0.591	213		0
chr10	128797500	129051500	254	10q26.2	254	S4(2.2)	1.122	1	670	DOCK1	0
chr18	75031500	75283500	252	18q23	252	S4(2.2)	0	0	0		0
chr11	20529500	20781500	252	11p15.1	252	S4(2.2)	0.008	0.032	128	NELL1	0
chr9	1163500	1412500	249	9p24.3	249	S4(2.2)	0	0	0		0
chr13	109215500	109463500	248	13q33.3	248	S4(2.2)	0	0	0	MYO16	0
chr5	144258500	144503500	245	5q31-32	245	S4(2.2)	0.001	0	0		0
chr7	25498500	25738500	240	7p15.2-3	240	S4(2.2)	0	0	0		0
chr17	49592500	49832500	240	17q21.33	240	S4(2.2)	0	0	0	CA10	0
chr18	58722500	58960500	238	18q21.32	238	S4(2.2)	0	0	0		0
chr3	18363500	18601500	238	3p24.3	238	S4(2.2)	0.006	0.017	4	TBC1D5	0
chr11	22964500	23202500	238	11p14.3	238	S4(2.2)	0.008	0	0		0
chr13	81088500	81325500	237	13q31.1	237	S4(2.2)	0.003	0	0		0
chr19	36990500	37225500	235	19q13.12	235	S4(2.2)	0.188	0.749	108		0
chrX	29044500	29279500	235	Xp21.3	235	S4(2.2)	0.005	0	0	IL1RAPL1	0
chr13	79469500	79704500	235	13q31.1	235	S4(2.2)	0.003	0.021	5		0
chr5	154554500	154787500	233	5q33.2	233	S4(2.2)	0	0	0		0
chr2	213163500	213395500	232	2q34	232	S4(2.2)	0	0	0	ERBB4	0
chr3	117610500	117842500	232	3q13.32	232	S4(2.2)	0	0	0	LSAMP,RP11-384F7.1	0
chr11	92242500	92473500	231	11q14.3	231	S4(2.2)	0	0	0	FAT3	0
chr8	55410500	55640500	230	8q11-12	230	S4(2.2)	0	0	0		0
chr4	82687500	82912500	225	4q21.22	225	S4(2.2)	0	0	0	RASGEF1B	0
chr4	178613500	178838500	225	4q34.3	225	S4(2.2)	0.001	0	0		0
chr10	131947500	132171500	224	10q26.3	224	S4(2.2)	0.303	0.393	101		0
chr1	76481500	76703500	222	1p31.1	222	S4(2.2)	0.004	0	0	ST6GALNAC3	0
chr2	90456500	91895500	1439	2p11.1-2	220	S4(2.2)	0	0	0		0
chr6	18734500	18953500	219	6p22.3	219	S4(2.2)	0	0	0		0
chr20	53024500	53243500	219	20q13.2	219	S4(2.2)	0	0	0		0
chr5	128254500	128472500	218	5q23.3	218	S4(2.2)	0.024	0.142	28		0
chr12	40607500	40824500	217	12q12	217	S4(2.2)	0.064	0.677	147		0
chr9	108601500	108817500	216	9q31.2	216	S4(2.2)	0.009	0.019	150		0
chr1	88743500	88959500	216	1p22.2	216	S4(2.2)	0.001	0	0		0
chr2	143241500	143457500	216	2q22.2	216	S4(2.2)	0	0	0		0
chr5	109349500	109565500	216	5q21.3	216	S4(2.2)	0	0	0		0
chr7	50279500	50494500	215	7p12.2	215	S4(2.2)	0	0	0		0
chr6	19444500	19658500	214	6p22.3	214	S4(2.2)	0	0	0		0
chr1	81308500	81522500	214	1p31.1	214	S4(2.2)	0	0	0		0
chr5	13261500	13475500	214	5p15.2	214	S4(2.2)	0	0	0		0
chr1	73149500	73360500	211	1p31.1	211	S4(2.2)	0.004	0	0		0
chr6	63977500	64188500	211	6q12	211	S4(2.2)	0.001	0.014	3		0
chr6	122530500	122740500	210	6q22.31	210	S4(2.2)	0.064	0.1	74		0
chr5	11198500	11408500	210	5p15.2	210	S4(2.2)	0.001	0.019	4	CTNND2	0
chr2	17552500	17761500	209	2p24.2	209	S4(2.2)	0	0	0		0
chr1	69169500	69376500	207	1p31.2	207	S4(2.2)	0	0.014	3		0
chr3	34236500	34442500	206	3p22.3	206	S4(2.2)	0	0	0		0
chr8	109187500	109393500	206	8q23.1	206	S4(2.2)	0.001	0	0		0
chr10	26359500	26564500	205	10p12.1	205	S4(2.2)	0	0	0		0
chr12	60925500	61129500	204	12q14.1	204	S4(2.2)	0	0	0		0
chr4	49316500	49661500	345	4p11	204	S4(2.2)	0	0	0		0
chr8	75750500	75953500	203	8q21.11	203	S4(2.2)	0	0	0		0
chr17	11600500	11803500	203	17p12	203	S4(2.2)	0	0	0		0
chr1	50437500	50639500	202	1p33	202	S4(2.2)	0	0	0	AGBL4	0
chr3	147215500	147417500	202	3q24	202	S4(2.2)	0	0	0		0
chr9	13288500	13489500	201	9p23	201	S4(2.2)	0	0	0		0
chr13	73128500	73329500	201	13q21-22	201	S4(2.2)	0.142	0.139	31		0
chr11	4995500	5193500	198	11p15.4	198	S4(2.2)	0	0	0		0
chr3	5357500	5555500	198	3p26.1	198	S4(2.2)	0.003	0	0		0
chr12	71570500	71767500	197	12q21.1	197	S4(2.2)	0	0	0		0
chr2	184236500	184433500	197	2q32.1	197	S4(2.2)	0.009	0	0		0
chr8	52343500	52538500	195	8q11.22	195	S4(2.2)	0.002	0.021	4		0
chr13	106203500	106398500	195	13q33.2	195	S4(2.2)	0	0	0		0
chr9	38597500	38792500	195	9p13.1	195	S4(2.2)	0	0	0		0
chrX	105645500	105840500	195	Xq22.3	195	S4(2.2)	0	0	0		0
chrX	21231500	21424500	193	Xp22.12	193	S4(2.2)	0.001	0.016	3		0
chr2	122891500	123082500	191	2q14.3	191	S4(2.2)	0	0	0		0
chr3	191237500	191428500	191	3q28	191	S4(2.2)	0	0	0		0
chr3	26842500	27033500	191	3p24.1	191	S4(2.2)	0	0	0		0
chr2	34191500	34381500	190	2p22.3	190	S4(2.2)	0	0	0	AC009499.1	0
chr5	129952500	130142500	190	5q23.3	190	S4(2.2)	0	0	0		0
chr7	8271500	8458500	187	7p21.3	187	S4(2.2)	0	0	0		0
chr4	22600500	22787500	187	4p15.2	187	S4(2.2)	0	0	0		0
chr13	26035500	26222500	187	13q12.13	187	S4(2.2)	0	0	0	ATP8A2	0
chr3	102276500	102462500	186	3q12.3	186	S4(2.2)	0	0	0		0
chr7	148003500	148189500	186	7q36.1	186	S4(2.2)	0	0	0	CNTNAP2	0
chr7	20479500	20665500	186	7p21.1	186	S4(2.2)	0	0	0		0
chr10	117424500	117610500	186	10q25.3	186	S4(2.2)	0	0	0	ATRNL1	0
chr20	54390500	54575500	185	20q13.2	185	S4(2.2)	0	0	0		0
chrX	36948500	37185500	237	Xp21.1	185	S4(2.2)	0	0	0		0
chr4	68056500	68241500	185	4q13.2	185	S4(2.2)	0	0	0		0
chr3	168322500	168506500	184	3q26.2	184	S4(2.2)	0	0	0	EGFEM1P	0
chr3	19712500	19895500	183	3p24.3	183	S4(2.2)	0	0	0		0
chr6	154229500	154412500	183	6q25.2	183	S4(2.2)	0	0	0		0
chrX	72220500	72414500	194	Xq13.2	182	S4(2.2)	0	0	0		0
chr4	21419500	21600500	181	4p15.2	181	S4(2.2)	0	0	0	KCNIP4	0
chrX	121320500	121500500	180	Xq25	180	S4(2.2)	0	0	0		0
chr8	87533500	87712500	179	8q21.3	179	S4(2.2)	0.262	0.335	96		0
chr2	84402500	84580500	178	2p11.2	178	S4(2.2)	0	0	0		0
chr12	73180500	73358500	178	12q21.1	178	S4(2.2)	0	0	0		0
chr11	133558500	133735500	177	11q25	177	S4(2.2)	0	0	0		0
chr6	70851500	71028500	177	6q13	177	S4(2.2)	0	0	0		0
chr5	88782500	88956500	174	5q14.3	174	S4(2.2)	0	0	0		0
chr2	21784500	21957500	173	2p24.1	173	S4(2.2)	0	0	0	AC067959.1	0
chr2	23202500	23374500	172	2p24.1	172	S4(2.2)	0	0	0		0
chr20	7429500	7599500	170	20p12.3	170	S4(2.2)	0	0	0		0
chr5	155772500	155942500	170	5q33.3	170	S4(2.2)	0.427	1	456	SGCD	0
chr14	85336500	85504500	168	14q31.3	168	S4(2.2)	0	0	0		0
chr4	66936500	67104500	168	4q13.2	168	S4(2.2)	0.001	0	0		0
chrX	3874500	4041500	167	Xp22.33	167	S4(2.2)	0	0	0		0
chr7	51267500	51433500	166	7p12.1	166	S4(2.2)	0	0	0		0
chr4	162367500	162533500	166	4q32.2	166	S4(2.2)	0.001	0	0	FSTL5	0
chr13	61132500	61297500	165	13q21.2	165	S4(2.2)	0.063	0.17	190		0
chr11	16271500	16435500	164	11p15.1	164	S4(2.2)	0	0	0	SOX6	0
chr7	123024500	123188500	164	7q31.32	164	S4(2.2)	0.001	0.043	7		0
chr13	78117500	78280500	163	13q22.3	163	S4(2.2)	0	0	0		0
chr5	106482500	106643500	161	5q21.3	161	S4(2.2)	0	0	0		0
chr9	82693500	82850500	157	9q21.31	157	S4(2.2)	0	0	0		0
chrX	97382500	97539500	157	Xq21.33	157	S4(2.2)	0	0	0		0
chr15	23603500	23759500	156	15q11.2	156	S4(2.2)	0	0	0		0
chr4	158690500	158844500	154	4q32.1	154	S4(2.2)	0	0	0		0
chr1	239603500	239756500	153	1q43	153	S4(2.2)	0	0	0	CHRM3	0
chr6	114537500	114688500	151	6q21-22	151	S4(2.2)	0.003	0	0	RP3-399L15.3	0
chr10	10468500	10619500	151	10p14	151	S4(2.2)	0	0	0		0
chr8	136781500	136931500	150	8q24.23	150	S4(2.2)	0	0	0		0
chr14	45866500	46015500	149	14q21.2	149	S4(2.2)	0.014	0.49	93		0
chr2	236501500	236650500	149	2q37.2	149	S4(2.2)	0.603	1	674	AGAP1	0
chr3	4353500	4502500	149	3p26.1	149	S4(2.2)	0.021	0.074	21	SUMF1	0
chr4	28086500	28233500	147	4p15.1	147	S4(2.2)	0.001	0	0		0
chr3	70417500	70560500	143	3p13	143	S4(2.2)	0	0	0		0
chr11	51467500	51609500	142	11p11.11-12	142	S4(2.2)	0	0	0		0
chr13	83090500	83232500	142	13q31.1	142	S4(2.2)	0.001	0	0		0
chr21	31251500	31392500	141	21q21.3	141	S4(2.2)	0	0	0		0
chr3	70228500	70369500	141	3p13	141	S4(2.2)	0	0	0		0
chr13	67518500	67658500	140	13q21.32	140	S4(2.2)	0	0	0	PCDH9	0
chr11	79358500	79497500	139	11q14.1	139	S4(2.2)	0	0	0		0
chr9	77171500	77309500	138	9q21.13	138	S4(2.2)	0	0	0		0
chr3	7991500	8128500	137	3p26.1	137	S4(2.2)	0	0	0	LMCD1-AS1	0
chr4	158277500	158412500	135	4q32.1	135	S4(2.2)	0	0	0		0
chr11	36879500	37014500	135	11p12	135	S4(2.2)	0	0	0		0
chr13	78884500	79019500	135	13q22-31	135	S4(2.2)	0	0	0	RNF219-AS1	0
chr15	20611500	21939500	1328	15q11.1-2	135	S4(2.2)	0	0.002	3		0
chr12	81593500	81727500	134	12q21.31	134	S4(2.2)	0.005	0	0	PPFIA2	0
chr3	79450500	79583500	133	3p12.3	133	S4(2.2)	0	0	0	ROBO1	0
chr5	41971500	42101500	130	5p13.1	130	S4(2.2)	0.003	0	0		0
chr11	91783500	91912500	129	11q14.3	129	S4(2.2)	0	0	0		0
chr8	13806500	13935500	129	8p22	129	S4(2.2)	0	0	0		0
chr12	71259500	71386500	127	12q15	127	S4(2.2)	0	0	0		0
chr8	56256500	56383500	127	8q12.1	127	S4(2.2)	0	0	0		0
chr4	71094500	71221500	127	4q13.3	127	S4(2.2)	0	0	0		0
chr2	236821500	236948500	127	2q37.2	127	S4(2.2)	0.603	1	674	AGAP1	0
chr18	68520500	68645500	125	18q22.2	125	S4(2.2)	0	0	0		0
chr2	41170500	41294500	124	2p22.1	124	S4(2.2)	0.001	0	0		0
chr8	78088500	78212500	124	8q21.11	124	S4(2.2)	0	0	0		0
chr4	166909500	167030500	121	4q32.3	121	S4(2.2)	0.001	0	0		0
chr7	126799500	126918500	119	7q31.33	119	S4(2.2)	0	0	0	GRM8	0
chr6	124875500	124994500	119	6q22.31	119	S4(2.2)	0	0	0	NKAIN2	0
chr11	96725500	96843500	118	11q21	118	S4(2.2)	0	0	0		0
chr2	41733500	41850500	117	2p21-22	117	S4(2.2)	0	0	0		0
chr5	103374500	103490500	116	5q21.2	116	S4(2.2)	0	0	0		0
chr4	176658500	176772500	114	4q34.2	114	S4(2.2)	0	0	0		0
chr3	167941500	168055500	114	3q26.2	114	S4(2.2)	0.002	0	0	EGFEM1P	0
chr2	163410500	163521500	111	2q24.2	111	S4(2.2)	0	0	0		0
chr8	50081500	50192500	111	8q11.21	111	S4(2.2)	0	0	0		0
chr5	20012500	20120500	108	5p14.3	108	S4(2.2)	0	0	0	CDH18	0
chr3	67488500	67596500	108	3p14.1	108	S4(2.2)	0	0	0		0
chr4	98732500	98839500	107	4q22-23	107	S4(2.2)	0	0	0	STPG2	0
chr5	109991500	110098500	107	5q22.1	107	S4(2.2)	0.284	0.271	39		0
chr15	86616500	86722500	106	15q25.3	106	S4(2.2)	0	0	0	AGBL1	0
chr11	82134500	82239500	105	11q14.1	105	S4(2.2)	0	0	0	RP11-179A16.1	0
chr14	42545500	42650500	105	14q21.1	105	S4(2.2)	0.001	0	0		0
chr5	163168500	163273500	105	5q34	105	S4(2.2)	0	0	0		0
chr2	105435500	105539500	104	2q12.1	104	S4(2.2)	0	0	0		0
chr4	72767500	72868500	101	4q13.3	101	S4(2.2)	0	0	0		0
chr8	16216500	16315500	99	8p22	99	S4(2.2)	0	0	0		0
chr12	72830500	72928500	98	12q21.1	98	S4(2.2)	2.318	1	423	TRHDE	0
chr7	12487500	12584500	97	7p21.3	97	S4(2.2)	0	0	0		0
chrX	154812500	154909500	97	Xq28	97	S4(2.2)	0.053	0.711	90		0
chr8	110746500	110842500	96	8q23.2	96	S4(2.2)	0	0	0		0
chrX	69036500	69125500	89	Xq13.1	89	S4(2.2)	0.002	0	0		0
chr8	36337500	36425500	88	8p12	88	S4(2.2)	0	0	0		0
chr10	108662500	108749500	87	10q25.1	87	S4(2.2)	0	0	0	SORCS1	0
chr11	31532500	31619500	87	11p13	87	S4(2.2)	0.204	1	284		0
chr21	9952500	10038500	86	21p11.2	86	S4(2.2)	0	0	0		0
chrX	85303500	85388500	85	Xq21.2	85	S4(2.2)	0	0	0		0
chr8	89152500	89237500	85	8q21.3	85	S4(2.2)	0.001	0	0		0
chr13	91214500	91298500	84	13q31.3	84	S4(2.2)	0	0	0		0
chrX	107781500	107864500	83	Xq22.3	83	S4(2.2)	0.001	0	0		0
chr2	107341500	107424500	83	2q12.2	83	S4(2.2)	0	0	0		0
chr10	86438500	86520500	82	10q23.1	82	S4(2.2)	0	0	0		0
chr7	54394500	54475500	81	7p11.2	81	S4(2.2)	0.001	0	0		0
chrX	75479500	75558500	79	Xq13.3	79	S4(2.2)	0.001	0	0		0
chr6	77823500	77901500	78	6q14.1	78	S4(2.2)	0.001	0	0		0
chr3	89149500	89225500	76	3p11.1	76	S4(2.2)	0	0	0		0
chr16	33847500	33923500	76	16p11.2	76	S4(2.2)	0	0	0		0
chr4	67590500	67661500	71	4q13.2	71	S4(2.2)	0.001	0	0		0
chr9	88306500	88376500	70	9q21.33	70	S4(2.2)	0.001	0	0		0
chr7	14640500	14710500	70	7p21.2	70	S4(2.2)	0	0	0	DGKB	0
chr8	73144500	73211500	67	8q13.3	67	S4(2.2)	0	0	0		0
chr8	66282500	66348500	66	8q13.1	66	S4(2.2)	0	0	0		0
chr11	92178500	92242500	64	11q14.3	64	S4(2.2)	0	0	0	FAT3	0
chr18	37638500	37697500	59	18q12.3	59	S4(2.2)	0	0	0		0
chr4	24500	80500	56	4p16.3	56	S4(2.2)	0.419	0.5	50		0
chr3	88872500	88925500	53	3p11.1	53	S4(2.2)	0	0	0		0
chr6	77724500	77776500	52	6q14.1	52	S4(2.2)	0	0	0		0
chr4	150029500	150080500	51	4q31.23	51	S4(2.2)	0	0	0		0
chr6	19395500	19444500	49	6p22.3	49	S4(2.2)	0	0	0		0
chr4	189905500	189954500	49	4q35.2	49	S4(2.2)	0	0	0		0
chrX	34430500	34479500	49	Xp21.1	49	S4(2.2)	0	0	0		0
chr2	195970500	196019500	49	2q32.3	49	S4(2.2)	0	0	0		0
chr8	15283500	15329500	46	8p22	46	S4(2.2)	0.001	0	0		0
chr21	22706500	22752500	46	21q21.1	46	S4(2.2)	0.132	1	555	NCAM2	0
chr2	195924500	195970500	46	2q32.3	46	S4(2.2)	0	0	0		0
chr2	108237500	108283500	46	2q12.3	46	S4(2.2)	0	0	0		0
chr9	78072500	78113500	41	9q21.13	41	S4(2.2)	0	0	0		0
chr4	66895500	66936500	41	4q13.2	41	S4(2.2)	0.001	0	0		0
chr11	84590500	84630500	40	11q14.1	40	S4(2.2)	0	0	0	DLG2	0
chr11	84630500	84666500	36	11q14.1	36	S4(2.2)	0	0	0	DLG2	0
chr20	26053500	26087500	34	20p11.1	34	S4(2.2)	0	0	0		0
chr4	149995500	150029500	34	4q31.23	34	S4(2.2)	0	0	0		0
chr14	19036500	19070500	34	14q11.1	34	S4(2.2)	0.015	0.382	16		0
chr16	75968500	76002500	34	16q23.1	34	S4(2.2)	0	0	0		0
chr6	8413500	8443500	30	6p24.3	30	S4(2.2)	0.009	0.3	350		0
chr15	19984500	20012500	28	15q11.1	28	S4(2.2)	0.002	0	0		0
chrX	154791500	154812500	21	Xq28	21	S4(2.2)	0	0	0		0
chr8	144500	162500	18	8p23.3	18	S4(2.2)	0	0	0		0
chr21	9719500	9805500	86	21p11.2	9	S4(2.2)	0.382	0.651	79		0
chr1	13156500	13158500	2	1p36.21	2	S4(2.2)	0	0	0		0
chr12	21981500	23102500	1121	12p12.1	1121	S4(2.3)	0.095	0.12	101		0
chr6	163442500	164553500	1111	6q26-27	1111	S4(2.3)	0.394	0.162	180	PACRG	0
chr12	119015500	119967500	952	12q24.23	952	S4(2.3)	0.008	0.024	23		0
chr6	79662500	80601500	939	6q14.1	939	S4(2.3)	0.046	0.297	154		0
chr2	130449500	131744500	1295	2q21.1	933	S4(2.3)	0.025	0.056	36		0
chr6	47487500	48331500	844	6p12.3	844	S4(2.3)	0.12	0.156	175		0
chr7	34590500	35478500	888	7p14.2-3	829	S4(2.3)	0.001	0.018	13	NPSR1-AS1	0
chr1	108011500	108752500	741	1p13.3	741	S4(2.3)	0.002	0.009	4		0
chr12	3934500	4632500	698	12p13.32	698	S4(2.3)	0.067	0.14	49		0
chr17	10209500	10871500	662	17p12-13	662	S4(2.3)	0.066	0.211	95		0
chr17	31547500	32203500	656	17q11-12	656	S4(2.3)	0	0	0	ASIC2	0
chr8	61622500	62277500	655	8q12.2-3	655	S4(2.3)	0.003	0.006	4		0
chr18	66630500	67275500	645	18q22.1-2	645	S4(2.3)	0.089	0.403	498		0
chr18	47551500	48183500	632	18q21.1	632	S4(2.3)	0.032	0.066	33		0
chr9	87040500	87633500	593	9q21.33	593	S4(2.3)	0.001	0	0		0
chr12	44428500	45017500	589	12q12	589	S4(2.3)	0.241	0.63	570	TMEM117	0.287	1		1
chr6	22201500	22781500	580	6p22.3	580	S4(2.3)	0	0	0	CASC15	0
chr10	18508500	19086500	578	10p12.31-33	578	S4(2.3)	0.065	0.066	38		0
chr2	210598500	211172500	574	2q34	574	S4(2.3)	0.133	0.172	313		0
chr19	37383500	37955500	572	19q13.12	572	S4(2.3)	0.197	0.549	89		0
chr7	140825500	141397500	572	7q34	572	S4(2.3)	0.147	0.257	149		0
chr6	146355500	146914500	559	6q24.3	559	S4(2.3)	0.055	0.073	41		0
chr14	81488500	82042500	554	14q31.1	554	S4(2.3)	0.001	0.029	12		0
chr3	75161500	75706500	545	3p12.3	545	S4(2.3)	0.004	0.191	90		0
chr1	230301500	230846500	545	1q42.13-2	545	S4(2.3)	0.433	0.328	224		0
chrX	66223500	66767500	544	Xq12	544	S4(2.3)	0.002	0.007	192		0
chr18	73438500	73981500	543	18q23	543	S4(2.3)	0	0	0		0
chr20	16504500	17040500	536	20p12.1	536	S4(2.3)	0.032	0.026	14		0
chr2	139109500	139635500	526	2q22.1	526	S4(2.3)	0.134	0.207	109		0
chr8	142753500	143323500	570	8q24.3	524	S4(2.3)	0	0	0		0
chr15	61605500	62125500	520	15q22.2	520	S4(2.3)	0	0	0		0
chr1	30290500	30804500	514	1p35.2	514	S4(2.3)	0	0	0		0
chr1	18356500	18861500	505	1p36.13	505	S4(2.3)	0	0	0		0
chr4	22036500	22532500	496	4p15.2	496	S4(2.3)	0.001	0.01	5		0
chr15	31977500	32465500	488	15q13.3	488	S4(2.3)	0.001	0	0		0
chr13	102586500	103070500	484	13q33.1	484	S4(2.3)	0	0	0	FGF14	0
chr8	9962500	10444500	482	8p23.1	482	S4(2.3)	0.415	0.826	381		0
chr7	12853500	13334500	481	7p21.3	481	S4(2.3)	0.001	0	0	AC011288.2	0
chr14	70400500	70879500	479	14q24.2	479	S4(2.3)	0	0	0		0
chr20	59812500	60288500	476	20q13.33	476	S4(2.3)	0.059	0.966	689	CDH4	0
chr2	214306500	214775500	469	2q34	469	S4(2.3)	0.014	0.365	396	SPAG16	0
chr10	23411500	23866500	455	10p12.2	455	S4(2.3)	0.02	0.105	42		0
chrX	65314500	65767500	453	Xq12	453	S4(2.3)	0	0	0		0
chr1	79822500	80274500	452	1p31.1	452	S4(2.3)	0	0	0		0
chr4	84962500	85414500	452	4q21.23	452	S4(2.3)	0	0	0		0
chr2	186651500	187096500	445	2q32.1	445	S4(2.3)	0	0	0		0
chr5	59499500	59942500	443	5q12.1	443	S4(2.3)	0	0	0	PDE4D	0
chr7	121353500	121794500	441	7q31.32	441	S4(2.3)	0	0	0		0
chr7	26213500	26652500	439	7p15.2	439	S4(2.3)	0.082	0.062	35		0
chr8	60819500	61258500	439	8q12.1	439	S4(2.3)	0	0	0		0
chr6	58336500	58774500	438	6p11.1-2	438	S4(2.3)	0.001	0	0		0
chr20	50879500	51316500	437	20q13.2	437	S4(2.3)	0.012	0.302	132		0
chr5	117704500	118138500	434	5q23.1	434	S4(2.3)	0	0	0		0
chr7	21442500	21872500	430	7p15.3	430	S4(2.3)	0.058	0.219	94		0
chr6	156280500	156705500	425	6q25.3	425	S4(2.3)	0	0.009	4		0
chr15	27989500	28412500	423	15q12-13	423	S4(2.3)	0	0	0		0
chr8	50853500	51271500	418	8q11.21	418	S4(2.3)	0	0	0	SNTG1	0
chr15	88424500	88841500	417	15q25.3	417	S4(2.3)	0	0	0		0
chr2	147494500	147905500	411	2q22.3	411	S4(2.3)	0	0	0		0
chr12	8951500	9361500	410	12p13.31	410	S4(2.3)	0.03	0.11	44		0
chr12	14472500	14879500	407	12p12-13	407	S4(2.3)	0.553	0.413	168		0
chr19	29593500	29995500	402	19q12	402	S4(2.3)	0	0	0		0
chr7	19541500	19937500	396	7p21.1	396	S4(2.3)	0	0	0		0
chr20	15122500	15496500	374	20p12.1	374	S4(2.3)	0.002	0	0	MACROD2	0
chr5	113863500	114229500	366	5q22.3	366	S4(2.3)	0	0	0		0
chr3	78374500	78738500	364	3p12.3	364	S4(2.3)	0	0	0	ROBO1	0
chr8	52588500	52945500	357	8q11.22-23	357	S4(2.3)	0.035	0.148	53		0
chr4	135572500	135929500	357	4q28.3	357	S4(2.3)	0.001	0	0		0
chr5	43850500	44205500	355	5p12	355	S4(2.3)	0	0	0		0
chr1	2679500	3031500	352	1p36.32	352	S4(2.3)	0.001	0	0		0
chr14	63202500	63554500	352	14q23.2	352	S4(2.3)	0	0	0		0
chr12	117728500	118080500	352	12q24.22	352	S4(2.3)	0	0.011	4	KSR2	0
chr2	167577500	167923500	346	2q24.3	346	S4(2.3)	0	0	0		0
chr3	169073500	169412500	339	3q26.2	339	S4(2.3)	0	0.009	3	MECOM	0
chr16	59101500	59439500	338	16q21	338	S4(2.3)	0.003	0.009	3		0
chr9	85723500	86058500	335	9q21.32	335	S4(2.3)	0.002	0	0		0
chr3	20176500	20510500	334	3p24.3	334	S4(2.3)	0.023	0.09	125		0
chr16	52673500	53007500	334	16q12.2	334	S4(2.3)	0.001	0.009	3		0
chrX	41861500	42192500	331	Xp11.4	331	S4(2.3)	0	0	0		0
chr7	37979500	38309500	330	7p14.1	330	S4(2.3)	0.199	0.185	61		0
chr12	67122500	67441500	319	12q14.3	319	S4(2.3)	0	0	0		0
chr1	82270500	82588500	318	1p31.1	318	S4(2.3)	0.004	0	0	LPHN2	0
chrX	138620500	138937500	317	Xq27.1	317	S4(2.3)	0	0	0		0
chr2	176222500	176538500	316	2q31.1	316	S4(2.3)	0	0	0		0
chr8	43191500	43503500	312	8p11.1	312	S4(2.3)	0	0	0		0
chr2	53407500	53717500	310	2p16.2	310	S4(2.3)	0	0	0		0
chr4	27304500	27606500	302	4p15.2	302	S4(2.3)	0	0	0		0
chr4	145743500	146044500	301	4q31.21	301	S4(2.3)	0.115	0.086	52		0
chr2	22023500	22317500	294	2p24.1	294	S4(2.3)	0	0	0	AC067959.1,AC068490.2	0
chr21	15677500	15971500	294	21q11.2	294	S4(2.3)	0.002	0.061	18		0
chr4	75920500	76211500	291	4q13.3	291	S4(2.3)	0	0	0		0
chr6	38961500	39249500	288	6p21.2	288	S4(2.3)	0	0	0		0
chr1	191919500	192204500	285	1q31.2	285	S4(2.3)	0	0	0		0
chr11	100253500	100533500	280	11q22.1	280	S4(2.3)	0	0	0		0
chr4	144956500	145231500	275	4q31.21	275	S4(2.3)	0	0	0		0
chr3	21874500	22132500	258	3p24.3	258	S4(2.3)	0	0	0	ZNF385D	0
chr11	132884500	133141500	257	11q25	257	S4(2.3)	0	0	0	OPCML	0
chr4	8863500	9116500	253	4p16.1	253	S4(2.3)	0	0	0		0
chr7	158861500	159113500	252	7q36.3	252	S4(2.3)	0	0	0		0
chr6	49011500	49262500	251	6p12.3	251	S4(2.3)	0.001	0	0		0
chr9	14993500	15243500	250	9p22.3	250	S4(2.3)	0.002	0.016	4		0
chr3	62813500	63062500	249	3p14.2	249	S4(2.3)	0	0	0		0
chr16	53721500	53969500	248	16q12.2	248	S4(2.3)	0.862	0.94	437		0
chr7	87171500	87415500	244	7q21.12	244	S4(2.3)	0.014	0.664	207		0
chr3	67141500	67384500	243	3p14.1	243	S4(2.3)	0.005	0.148	37		0
chr3	63113500	63356500	243	3p14.2	243	S4(2.3)	0	0	0		0
chrX	76194500	76436500	242	Xq21.1	242	S4(2.3)	0	0	0		0
chr18	48750500	48991500	241	18q21.2	241	S4(2.3)	0.001	0.029	33		0
chr13	84132500	84372500	240	13q31.1	240	S4(2.3)	0.001	0	0		0
chr14	106345500	106597500	252	14q32.33	239	S4(2.3)	0	0	0		0
chr19	56808500	57045500	237	19q13.43	237	S4(2.3)	0.118	0.544	37		0
chr2	127268500	127502500	234	2q14.3	234	S4(2.3)	0.267	0.235	55		0
chr15	98064500	98297500	233	15q26.2	233	S4(2.3)	0	0	0		0
chr12	42125500	42358500	233	12q12	233	S4(2.3)	0	0	0		0
chr11	26374500	26605500	231	11p14.2	231	S4(2.3)	0	0	0		0
chr8	53774500	54003500	229	8q11.23	229	S4(2.3)	0	0	0		0
chr4	28374500	28603500	229	4p15.1	229	S4(2.3)	0.001	0	0		0
chr5	82955500	83184500	229	5q14.3	229	S4(2.3)	0	0	0		0
chrX	121045500	121273500	228	Xq25	228	S4(2.3)	0.001	0	0		0
chr1	233956500	234183500	227	1q42.2	227	S4(2.3)	0	0	0		0
chr5	160074500	160301500	227	5q34	227	S4(2.3)	0	0	0		0
chr17	52935500	53161500	226	17q22	226	S4(2.3)	0.349	0.814	200		0
chr13	97310500	97534500	224	13q32.1	224	S4(2.3)	0	0	0	HS6ST3	0
chr13	53341500	53565500	224	13q14.3	224	S4(2.3)	0	0	0		0
chr13	90862500	91084500	222	13q31.3	222	S4(2.3)	0	0	0		0
chr10	113653500	113873500	220	10q25.2	220	S4(2.3)	0	0	0		0
chr6	27881500	28099500	218	6p22.1	218	S4(2.3)	0.028	0.468	65		0
chr8	110470500	110688500	218	8q23.1-2	218	S4(2.3)	0.061	0.124	27		0
chrX	140306500	140526500	220	Xq27.2	217	S4(2.3)	0.056	1	374		0
chr1	216218500	216432500	214	1q41	214	S4(2.3)	0	0	0	USH2A	0
chr6	5506500	5720500	214	6p25.1	214	S4(2.3)	0.785	1	563	FARS2	0
chr7	3219500	3431500	212	7p22.2	212	S4(2.3)	0	0	0	SDK1	0
chr4	130141500	130353500	212	4q28.2	212	S4(2.3)	0	0	0		0
chr10	85744500	85956500	212	10q23.1	212	S4(2.3)	0.168	0.146	31		0
chr20	21472500	21682500	210	20p11.22	210	S4(2.3)	0	0	0		0
chr12	99338500	99546500	208	12q23.1	208	S4(2.3)	0	0	0	ANKS1B	0
chr18	39147500	39352500	205	18q12.3	205	S4(2.3)	0	0	0		0
chr14	29053500	29258500	205	14q12	205	S4(2.3)	0	0	0		0
chr4	37384500	37588500	204	4p14	204	S4(2.3)	0	0	0		0
chrX	140689500	140890500	201	Xq27.2	201	S4(2.3)	0.004	0	0		0
chr8	5654500	5854500	200	8p23.2	200	S4(2.3)	0	0	0		0
chr4	23602500	23801500	199	4p15.2	199	S4(2.3)	0	0	0		0
chr5	8278500	8475500	197	5p15.31	197	S4(2.3)	0	0	0		0
chr3	87806500	88002500	196	3p11.1-2	196	S4(2.3)	0	0	0		0
chr8	72455500	72650500	195	8q13.3	195	S4(2.3)	0	0	0		0
chr18	58122500	58315500	193	18q21.32	193	S4(2.3)	0	0	0		0
chr1	169183500	169374500	191	1q24.2	191	S4(2.3)	0.263	0.199	61		0
chr2	89134500	89325500	191	2p11.2	191	S4(2.3)	0	0	0		0
chr10	24238500	24428500	190	10p12.2	190	S4(2.3)	0	0	0	KIAA1217	0
chr1	107278500	107468500	190	1p13.3	190	S4(2.3)	0	0	0		0
chr16	8329500	8518500	189	16p13.2	189	S4(2.3)	0	0	0		0
chr3	115907500	116096500	189	3q13.31	189	S4(2.3)	0.001	0	0	LSAMP	0
chr18	26060500	26248500	188	18q12.1	188	S4(2.3)	0.002	0.021	4		0
chr4	150137500	150324500	187	4q31.23	187	S4(2.3)	0	0	0	RP11-526A4.1	0
chr6	55032500	55218500	186	6p12.1	186	S4(2.3)	0	0	0		0
chr15	87975500	88160500	185	15q25.3	185	S4(2.3)	0	0	0		0
chr13	96753500	96938500	185	13q32.1	185	S4(2.3)	0	0	0	HS6ST3	0
chr12	14255500	14436500	181	12p13.1	181	S4(2.3)	0.003	0.017	3		0
chr5	173832500	174012500	180	5q35.2	180	S4(2.3)	0.001	0	0		0
chr11	56603500	56782500	179	11q12.1	179	S4(2.3)	0	0	0		0
chr12	20736500	20915500	179	12p12.2	179	S4(2.3)	0	0	0		0
chr3	182216500	182393500	177	3q26.33	177	S4(2.3)	0	0	0		0
chr6	55269500	55445500	176	6p12.1	176	S4(2.3)	0	0	0		0
chr7	48409500	48584500	175	7p12.3	175	S4(2.3)	0.011	0.137	222		0
chr12	40384500	40555500	171	12q12	171	S4(2.3)	0	0	0		0
chr11	59761500	59931500	170	11q12.1-2	170	S4(2.3)	0	0	0		0
chr4	128223500	128389500	166	4q28.1	166	S4(2.3)	0	0	0		0
chrX	148188500	148351500	163	Xq28	163	S4(2.3)	0	0	0		0
chr20	11934500	12097500	163	20p12.2	163	S4(2.3)	0.007	0.018	67		0
chr8	63027500	63186500	159	8q12.3	159	S4(2.3)	0	0	0	NKAIN3	0
chr2	57816500	57974500	158	2p16.1	158	S4(2.3)	0	0	0		0
chr5	50882500	51038500	156	5q11.2	156	S4(2.3)	0	0	0		0
chr6	121457500	121613500	156	6q22.31	156	S4(2.3)	0.001	0	0		0
chr7	36769500	36925500	156	7p14.2	156	S4(2.3)	0	0	0	ELMO1	0
chr10	129119500	129274500	155	10q26.2	155	S4(2.3)	0.967	0.903	670	DOCK1	0
chr6	20888500	21040500	152	6p22.3	152	S4(2.3)	0.596	1	724	CDKAL1	0
chr10	54699500	54850500	151	10q21.1	151	S4(2.3)	0	0	0		0
chr2	138488500	138639500	151	2q22.1	151	S4(2.3)	0	0	0		0
chr10	25633500	25784500	151	10p12.1	151	S4(2.3)	0	0	0		0
chr2	59310500	59457500	147	2p16.1	147	S4(2.3)	0	0	0	RP11-444A22.1	0
chr5	86915500	87061500	146	5q14.3	146	S4(2.3)	0.001	0	0		0
chr3	118441500	118584500	143	3q13.32	143	S4(2.3)	0.001	0	0		0
chr8	88582500	88724500	142	8q21.3	142	S4(2.3)	0.001	0.021	3	CNBD1	0
chr6	91269500	91410500	141	6q15	141	S4(2.3)	0.002	0.064	9		0
chr9	76128500	76269500	141	9q21.13	141	S4(2.3)	0	0	0		0
chr13	94000500	94141500	141	13q31.3	141	S4(2.3)	0	0	0	GPC6	0
chr3	67928500	68065500	137	3p14.1	137	S4(2.3)	0.005	0	0	FAM19A1	0
chr7	123451500	123588500	137	7q31.32	137	S4(2.3)	0	0	0		0
chr3	78826500	78962500	136	3p12.3	136	S4(2.3)	0.001	0	0	ROBO1	0
chr4	90749500	90885500	136	4q22.1	136	S4(2.3)	0	0	0		0
chr17	9163500	9299500	136	17p13.1	136	S4(2.3)	0.001	0.022	3		0
chr4	61702500	61827500	125	4q13.1	125	S4(2.3)	0	0	0		0
chr4	115471500	115596500	125	4q26	125	S4(2.3)	0	0	0		0
chr8	77066500	77187500	121	8q21.11	121	S4(2.3)	0	0	0		0
chr8	15329500	15448500	119	8p22	119	S4(2.3)	0.272	0.437	262		0
chr7	13567500	13685500	118	7p21.3	118	S4(2.3)	0	0	0	AC011288.2	0
chrX	77970500	78088500	118	Xq21.1	118	S4(2.3)	0	0	0		0
chr5	6999500	7117500	118	5p15.31	118	S4(2.3)	0	0	0		0
chr7	14150500	14267500	117	7p21.2	117	S4(2.3)	0	0	0	DGKB	0
chr19	27735500	27852500	117	19q11	117	S4(2.3)	0	0	0		0
chr14	40144500	40260500	116	14q21.1	116	S4(2.3)	0.005	0	0		0
chr16	31926500	32041500	115	16p11.2	115	S4(2.3)	0.135	0.139	58		0
chr8	2065500	2180500	115	8p23.3	115	S4(2.3)	0.003	0.183	21		0
chr11	29649500	29763500	114	11p14.1	114	S4(2.3)	0	0	0		0
chr3	104127500	104240500	113	3q13.11	113	S4(2.3)	0.001	0.035	4		0
chr5	107527500	107639500	112	5q21.3	112	S4(2.3)	0	0	0	FBXL17	0
chr2	3988500	4096500	108	2p25.3	108	S4(2.3)	0	0	0		0
chr4	118832500	118940500	108	4q26	108	S4(2.3)	0	0	0		0
chr2	103235500	103342500	107	2q12.1	107	S4(2.3)	0	0	0		0
chr18	61914500	62021500	107	18q22.1	107	S4(2.3)	0	0	0		0
chr9	12460500	12566500	106	9p23	106	S4(2.3)	0	0	0		0
chr9	32069500	32175500	106	9p21.1	106	S4(2.3)	0	0	0		0
chr14	37802500	37907500	105	14q21.1	105	S4(2.3)	0.199	1	367		0
chr3	88206500	88308500	102	3p11.1	102	S4(2.3)	0.147	0.373	46		0
chr10	65895500	65996500	101	10q21.3	101	S4(2.3)	0	0	0		0
chrX	23176500	23275500	99	Xp22.11	99	S4(2.3)	0	0	0	RP11-40F8.2	0
chr1	102136500	102235500	99	1p21.1-2	99	S4(2.3)	0	0	0		0
chr2	108568500	108665500	97	2q12.3	97	S4(2.3)	0.001	0	0		0
chr18	25184500	25281500	97	18q12.1	97	S4(2.3)	0	0	0		0
chr18	64620500	64715500	95	18q22.1	95	S4(2.3)	0	0	0		0
chr12	55403500	55497500	94	12q13.2	94	S4(2.3)	0	0	0		0
chr4	160693500	160785500	92	4q32.1	92	S4(2.3)	0.002	0	0		0
chr5	107342500	107433500	91	5q21.3	91	S4(2.3)	0	0	0	FBXL17	0
chr6	97966500	98046500	80	6q16.1	80	S4(2.3)	0.004	0	0		0
chr11	89395500	89475500	80	11q14.3	80	S4(2.3)	0	0	0		0
chr6	29064500	29143500	79	6p22.1	79	S4(2.3)	0	0	0		0
chrX	72572500	72647500	75	Xq13.2	75	S4(2.3)	0	0	0		0
chr12	55497500	55572500	75	12q13.2	75	S4(2.3)	0	0	0		0
chrX	99573500	99647500	74	Xq22.1	74	S4(2.3)	0	0	0		0
chrX	154532500	154654500	122	Xq28	73	S4(2.3)	0.001	0	0		0
chr2	180023500	180093500	70	2q31.2	70	S4(2.3)	0.001	0	0		0
chr1	71905500	71975500	70	1p31.1	70	S4(2.3)	0.012	0	0	NEGR1	0
chr10	85332500	85402500	70	10q23.1	70	S4(2.3)	0	0	0		0
chr21	10811500	10880500	69	21p11.2	69	S4(2.3)	0.004	0	0		0
chr6	5438500	5506500	68	6p25.1	68	S4(2.3)	0.676	1	563	FARS2	0
chrX	96063500	96130500	67	Xq21.33	67	S4(2.3)	0.503	1	936	DIAPH2	0.172	1		1
chr8	105017500	105081500	64	8q22.3	64	S4(2.3)	0.221	1	758	RIMS2	0
chr13	78550500	78611500	61	13q22.3	61	S4(2.3)	0	0	0	RNF219-AS1	0
chr6	77425500	77486500	61	6q14.1	61	S4(2.3)	0	0	0		0
chr9	66432500	66493500	61	9q13	61	S4(2.3)	0.015	0.479	29		0
chr5	30852500	30913500	61	5p13.3	61	S4(2.3)	0	0	0		0
chrX	25280500	25339500	59	Xp21.3	59	S4(2.3)	0	0	0		0
chr12	72928500	72986500	58	12q21.1	58	S4(2.3)	2.318	1	423	TRHDE	0
chr8	104894500	104948500	54	8q22.3	54	S4(2.3)	0.221	1	758	RIMS2	0
chr8	137947500	138001500	54	8q24.23	54	S4(2.3)	0	0	0		0
chrX	155192500	155245500	53	Xq28	53	S4(2.3)	0	0	0		0
chr8	52221500	52274500	53	8q11.22	53	S4(2.3)	0	0	0		0
chrX	69125500	69177500	52	Xq13.1	52	S4(2.3)	0.001	0	0		0
chr4	49265500	49316500	51	4p11	51	S4(2.3)	0	0	0		0
chr16	46364500	46413500	49	16q11.2	49	S4(2.3)	0	0	0		0
chr1	71262500	71311500	49	1p31.1	49	S4(2.3)	0	0	0		0
chrX	140257500	140306500	49	Xq27.1-2	49	S4(2.3)	0.056	0.735	374		0
chr8	138342500	138390500	48	8q24.23	48	S4(2.3)	0	0	0		0
chr20	26183500	26230500	47	20p11.1	47	S4(2.3)	0	0	0		0
chr6	77776500	77823500	47	6q14.1	47	S4(2.3)	0	0	0		0
chr8	46863500	46910500	47	8q11.1	47	S4(2.3)	0	0	0		0
chrX	154654500	154749500	95	Xq28	46	S4(2.3)	0.001	0	0		0
chr13	67658500	67702500	44	13q21.32	44	S4(2.3)	0	0	0	PCDH9	0
chr13	94395500	94439500	44	13q31.3	44	S4(2.3)	0	0	0	GPC6	0
chr4	176463500	176505500	42	4q34.2	42	S4(2.3)	0	0	0		0
chr8	16178500	16216500	38	8p22	38	S4(2.3)	0	0	0		0
chr9	66780500	66815500	35	9q13	35	S4(2.3)	0	0	0		0
chrX	113758500	113789500	31	Xq23	31	S4(2.3)	0	0	0		0
chr12	72800500	72830500	30	12q21.1	30	S4(2.3)	2.318	1	423	TRHDE	0
chr4	175604500	175633500	29	4q34.1	29	S4(2.3)	0	0	0		0
chr10	42574500	42599500	25	10q11.21	25	S4(2.3)	0.001	0	0		0
chr18	39797500	39821500	24	18q12.3	24	S4(2.3)	0.024	1	162	LINC00907	0
chr21	10746500	10768500	22	21p11.2	22	S4(2.3)	0	0	0		0
chr9	69793500	69810500	17	9q21.11	17	S4(2.3)	0	0	0		0
chr1	143556500	143565500	9	1q21.1	9	S4(2.3)	0	0	0		0
chr10	42500500	42507500	7	10q11.21	7	S4(2.3)	0	0	0		0
chr3	35844500	35847500	3	3p22.3	3	S4(2.3)	0	0	0		0
chr5	105583500	105584500	1	5q21.3	1	S4(2.3)	0	0	0		0
chr19	51377500	52648500	1271	19q13.33-41	1271	S4(2.4)	0.083	0.115	29		0
chr2	56565500	57565500	1000	2p16.1	1000	S4(2.4)	0.683	0.93	1085		0
[truncated: 8,781 more rows]
