# Supplementary material for: Large transcription units unify copy number variants and common fragile sites arising under replication stress
Source: Genome Res. 2015 Feb;25(2):189–200. doi: 10.1101/gr.177121.114 (PMC4315293; doi:10.1101/gr.177121.114)
Supplement: Supplemental Material [file supp_gr.177121.114_Table_S4.xlsx]

## Sheet: Human CFS
		CFS breaks		CNVs		longest TU (Kb)
chrom	band	090	HF1	090	HF1	090	HF1	genes >= 500 Kb
1	1p32-33	1	1	0	2	551	1559	DAB1,FAF1,AGBL4
1	1p31.1	28	15	7	4	914	924	LPHN2,ST6GALNAC3,NEGR1,LRRC7
1	1p21.2-21.3	4	1	2	2	868	870	DPYD
1	1p13	0	1	1	0	352	326
1	1p11-12	2	0	0	0	169	197
1	1q23	1	2	1	0	334	337
1	1q25	2	0	5	0	839	840	RABGAP1L
1	1q31	1	1	1	0	470	463
1	1q41	0	1	2	0	355	284	USH2A,ESRRG
1	1q44	2	1	5	3	831	831	KIF26B,SMYD3
2	2p23.3	1	2	1	0	297	298
2	2p22	1	0	4	0	493	467	SLC8A1,AC009499.1
2	2q11	1	0	0	0	542	580	AFF3
2	2q14	1	0	2	0	329	334	DPP10,CNTNAP5
2	2q22-23	2	1	1	2	403	520	THSD7B,LRP1B,ARHGAP15,TEX41,GALNT13
2	2q32	1	1	2	0	553	417	AC007319.1,AC068718.1
2	2q33	6	0	4	1	1081	1109	PARD3B
2	2q35-36	0	1	0	0	478	615
3	3p25-26	1	0	1	0	584	873	LMCD1-AS1,GRM7,SUMF1,CNTN4
3	3p21.3	1	0	1	0	339	341
3	3p14	5	6	2	0	758	759	FAM19A1,MAGI1,PTPRG,FHIT,ERC2,CACNA2D3
3	3p12.3-13	12	3	6	0	1096	645	ROBO1,ROBO2,FOXP1
3	3q13.31	14	0	41	0	2201	831	ZBTB20,LSAMP
3	3q26.3	6	9	5	2	1371	1375	NLGN1,NAALADL2,KCNMB2,SOX2-OT
3	3q27.3,3q28	1	1	2	0	828	824	EIF2B5,LPP,FGF12
4	4p16.1	0	1	1	0	562	223	SORCS2
4	4q13	1	0	0	0	481	440	LPHN3
4	4q22	1	0	2	0	446	360	CCSER1,GRID2,RP11-145G20.1,STPG2
4	4q26-28	1	0	0	0	589	407	ANK2
4	4q31	1	1	0	0	847	857	INPP4B,RP11-526A4.1,LRBA
4	4q32	1	0	0	0	333	306	FSTL5,MARCH1,SPOCK3
4	4q34	1	0	1	0	683	668	GALNTL6,TENM3
4	4q35	0	2	0	0	683	668	TENM3
5	5p12-13	0	2	0	0	584	402
5	5q11.2-q12.1	1	0	2	0	429	803	PDE4D
5	5q12	1	1	3	0	384	803	PDE4D,MAST4
5	5q13	0	1	0	0	327	327
5	5q14	0	1	0	0	363	357	MEF2C-AS1,GPR98
5	5q15	10	0	5	0	823	823	MCTP1,CTD-2337A12.1
5	5q21	0	1	1	0	955	527	RP11-6N13.1,FBXL17
5	5q32	0	1	1	0	454	454
5	5q33	1	0	1	0	978	456	AC091969.1,SGCD
6	6p24	0	1	2	0	349	349	OFCC1,PHACTR1
6	6p22	2	1	2	0	713	724	CASC15,CDKAL1
6	6p11-12	1	0	3	1	522	522
6	6q13	1	1	1	0	865	587	BAI3,RIMS1,KCNQ5,RP11-554D15.1
6	6q21	1	2	0	0	290	346	RP3-399L15.3
6	6q22	1	0	2	0	643	649	RP3-399L15.3,NKAIN2,PTPRK,LAMA2
6	6q26	1	0	0	0	779	224	PARK2,PACRG
7	7q11.2	25	7	21	0	1220	389	AUTS2,WBSCR17,CALN1,UPK3B
7	7q21.1	13	7	7	2	1475	1464	MAGI2,SEMA3A,ZNF804B,CDK14
7	7q31	5	2	3	2	929	928	IMMP2L,FOXP2,CADPS2,GRM8
7	7q32	1	1	2	0	459	464	PLXNA4
8	8p22-23	0	1	2	0	611	591	CSMD1,PSD3,SGCZ
8	8q21	2	1	1	0	362	606	RALYL,CNBD1
8	8q22	1	1	2	0	872	872	VPS13B,RIMS2,RP11-127H5.1,KB-1047C11.2,CPQ,STK3
8	8q24	1	0	3	0	738	748	TRAPPC9
10	10q21.1	6	3	7	8	1046	1324	PRKG1,PCDH15
10	10q24	1	0	1	0	274	284	HPSE2
10	10q26	3	1	4	0	679	670	DOCK1
11	11p14	1	0	0	0	486	287	DCDC1,LUZP2
11	11q24	1	0	4	0	588	589	KIRREL3
12	12p13	1	0	2	2	662	659	CACNA1C,ERC1
12	12p12	1	0	2	0	496	497
12	12q12	0	1	1	1	565	569	TMEM117
13	13q22	2	1	1	1	476	301	RNF219-AS1
13	13q31.3-q32.2	8	1	2	0	1204	327	GPC5,GPC6,HS6ST3
13	13q33	1	1	1	0	634	367	FGF14,FAM155A,MYO16
14	14q13.3-q21	1	0	4	0	380	366	LINC00871,MDGA2
14	14q22	1	0	2	0	442	242	AL163953.3
14	14q24	2	0	2	0	807	881	RAD51B,RGS6,NRXN3
14	14q32	1	0	2	0	479	487	RP11-33N16.3
15	15q22-23	4	0	3	4	752	750	RORA,THSD4
16	16q13	1	0	0	0	121	124
16	16q23.1	10	24	9	1	881	568	WWOX
16	16q23.3	0	4	3	2	1170	1171	CDH13
17	17q25	0	1	1	0	452	467	RBFOX3
18	18p11.2-p11.3	3	2	1	2	844	845	PTPRM,DLGAP1
18	18q12	1	1	3	1	636	699	CCDC178,LINC00669,LINC00907
18	18q22	1	0	1	0	515	617	ZNF407
20	20p12	2	2	2	1	1311	841	PLCB1,MACROD2
20	20p11.2	1	0	1	0	326	326	SLC24A3
22	22q12	1	1	1	1	739	724	TTC28,SYN3,LARGE
X	Xp22	0	1	0	0	554	591	RP11-40F8.2,FRMPD4,ARHGAP6
X	Xq21.3	1	2	2	3	949	936	PCDH11X,DIAPH2
X	Xq26	1	1	1	0	620	282	FGF13
Total breaks		224	130
Total cells		150	100
