# Supplementary material for: Large transcription units unify copy number variants and common fragile sites arising under replication stress
Source: Genome Res. 2015 Feb;25(2):189–200. doi: 10.1101/gr.177121.114 (PMC4315293; doi:10.1101/gr.177121.114)
Supplement: Supplemental Material [file supp_gr.177121.114_Table_S5.xlsx]

## Sheet: 090 CNV regions
			Number of CNVs in region
score	aggregate	r	>=1	1	2 to 4	>=5
No. of regions			196	157	30	9
No. of CNVs			335	157	72	106
Length of region (log bp)	Median	0.518	5.29	5.09	5.89	6.03
Median CNV size (log bp)	Median	0.206	5.14	5.09	5.45	5.29
Array probes per bp	Median	-0.025	0.000398 (0.298)	0.000403 (0.363)	0.000391 (0.444)	0.000437 (0.176)
G/C fraction	Median	-0.106	0.398 (0.481)	0.399 (0.629)	0.398 (0.889)	0.368 (0.0623)
CpG fraction	Median	-0.131	0.0085 (0.737)	0.00878 (0.339)	0.00839 (0.988)	0.00667 (0.248)
Simple repeat fraction	Median	-0.005	0.0145 (0.309)	0.0144 (0.489)	0.0148 (0.445)	0.0148 (0.628)
Overlaps gene (%)		0.165	86.2 (0.165)	83.4 (0.257)	96.7 (0.656)	100 (0.709)
Fraction in genes	Avg.	0.094	0.66 (7.53e-05)	0.637 (0.0103)	0.715 (0.00144)	0.864 (0.000109)
Gene length (log bp)	Median	0.41	5.47 (3.84e-06)	5.27 (0.181)	5.79 (2.12e-06)	6.08 (1.87e-05)
Overlaps gene >500Kb (%)		0.379	30.6 (7.8e-12)	22.3 (0.000646)	56.7 (6.79e-08)	88.9 (2.94e-05)
Fraction in genes >500Kb	Avg.	0.355	0.238 (2.15e-13)	0.177 (0.000392)	0.384 (5.47e-11)	0.827 (9.81e-13)
Overlaps TU (%)		0.203	78.6 (6.31e-07)	74.5 (3.25e-05)	93.3 (0.0273)	100 (0.722)
Fraction in TUs	Avg.	0.081	0.601 (1.39e-15)	0.577 (2.19e-09)	0.663 (4.47e-07)	0.797 (2.28e-06)
Fraction in transcribed genes	Avg.	0.161	0.499 (3.88e-15)	0.466 (4.12e-08)	0.595 (5.71e-09)	0.764 (1.94e-09)
Fraction in untranscribed genes	Avg.	0.117	0.178 (9.28e-05)	0.187 (0.00281)	0.145 (0.00677)	0.119 (0.0312)
TU length (log bp)	Median	0.459	5.39 (2.83e-06)	5.32 (0.00279)	5.73 (3.93e-08)	6.02 (1.86e-07)
Overlaps TU >500Kb (%)		0.472	23.5 (1.05e-25)	14 (2.24e-07)	53.3 (3.43e-18)	88.9 (~0)
Fraction in TUs >500Kb	Avg.	0.422	0.189 (2.28e-36)	0.129 (4.96e-11)	0.339 (1.19e-15)	0.737 (~0)
RPKM (log)	Median	0.184	-0.486 (0.000454)	-0.591 (0.000804)	-0.271 (0.00697)	-0.402 (0.316)
TU RPKM (log)	Median	0.096	0.0409 (0.053)	0.0128 (0.034)	0.297 (0.0564)	-0.353 (0.00045)
Ends in TU (%)		0.181	71.4 (4.01e-07)	67.5 (5.44e-05)	83.3 (0.00547)	100 (0.0161)
Repli-seq score	Median	-0.048	4.02 (0.000298)	4.03 (0.000568)	4.19 (0.0518)	2.39 (0.0813)
Fraction early-replicating	Avg.	-0.003	0.232 (2e-06)	0.238 (2.08e-05)	0.267 (0.00225)	0.0248 (0.28)
Fraction late-replicating	Avg.	0.081	0.181 (0.439)	0.18 (0.531)	0.107 (0.138)	0.435 (0.0484)
Fraction transcribed late-rep.	Avg.	0.283	0.106 (1.53e-06)	0.0865 (0.00702)	0.11 (0.00871)	0.441 (1.17e-17)

## Sheet: mES CNV regions
			Number of CNVs in region
score	aggregate	r	>=1	1	2 to 4	>=5
No. of regions			189	135	40	14
No. of CNVs			369	135	97	137
Length of region (log bp)	Median	0.62	4.81	4.51	5.42	5.65
Median CNV size (log bp)	Median	0.327	4.67	4.51	4.89	4.97
Array probes per bp	Median	-0.469	0.000295 (7.71e-70)	0.000309 (7.72e-115)	0.000285 (2.5e-07)	0.000282 (0.212)
G/C fraction	Median	-0.141	0.398 (0.000114)	0.4 (0.00976)	0.391 (0.00839)	0.39 (0.0811)
CpG fraction	Median	-0.102	0.00638 (0.00119)	0.00664 (0.0412)	0.00639 (0.0893)	0.00618 (0.19)
Simple repeat fraction	Median	0.046	0.0264 (0.272)	0.0255 (0.389)	0.0268 (0.287)	0.0272 (0.536)
Overlaps gene (%)		0.216	75.7 (0.000221)	70.4 (0.00248)	85 (0.0646)	100 (0.0586)
Fraction in genes	Avg.	0.247	0.654 (1.63e-15)	0.596 (1.58e-06)	0.772 (7.64e-11)	0.879 (6.89e-08)
Gene length (log bp)	Median	0.418	5.62 (3.66e-23)	5.5 (1.07e-09)	5.88 (1.11e-12)	5.92 (1.63e-06)
Overlaps gene >500Kb (%)		0.49	37 (2.94e-44)	22.2 (1.36e-10)	72.5 (4.53e-41)	78.6 (1.11e-05)
Fraction in genes >500Kb	Avg.	0.463	0.352 (3.18e-57)	0.222 (2.54e-13)	0.659 (1.47e-51)	0.731 (~0)
Overlaps TU (%)		0.169	66.7 (0.0243)	62.2 (0.0529)	70 (0.752)	100 (0.0572)
Fraction in TUs	Avg.	0.068	0.514 (2.81e-05)	0.512 (0.00131)	0.428 (0.466)	0.789 (4.47e-06)
Fraction in transcribed genes	Avg.	0.134	0.417 (5.17e-08)	0.403 (0.000111)	0.369 (0.0375)	0.687 (3.86e-08)
Fraction in untranscribed genes	Avg.	0.184	0.248 (2.49e-06)	0.207 (0.0259)	0.404 (2.44e-11)	0.199 (0.33)
TU length (log bp)	Median	0.31	5.45 (1.92e-20)	5.22 (6.85e-05)	5.54 (1.23e-08)	5.7 (2.61e-06)
Overlaps TU >500Kb (%)		0.298	13.8 (3.03e-27)	8.15 (3.18e-06)	20 (~0)	50 (~0)
Fraction in TUs >500Kb	Avg.	0.312	0.13 (2.44e-35)	0.0776 (1.78e-06)	0.182 (~0)	0.481 (~0)
RPKM (log)	Median	-0.02	-1.54 (0.327)	-1.51 (0.0663)	-1.78 (0.237)	-1.36 (0.505)
TU RPKM (log)	Median	-0.214	-0.891 (1.44e-06)	-0.614 (0.126)	-1.24 (1.11e-06)	-1.08 (0.000912)
Ends in TU (%)		0.085	60.8 (0.00337)	59.3 (0.015)	55 (0.91)	92.9 (0.016)
Rep. timing tatio (log2)	Median	-0.288	-0.832 (0.00195)	-0.676 (0.0683)	-0.994 (0.0527)	-1.08 (0.183)
Fraction early-replicating	Avg.	-0.167	0.181 (1.16e-05)	0.228 (0.0142)	0.0861 (0.000683)	0 (0.00506)
Fraction late-replicating	Avg.	0.203	0.568 (9.88e-09)	0.488 (0.00632)	0.722 (1.07e-06)	0.911 (3.3e-06)
Fraction transcribed late-rep.	Avg.	0.423	0.242 (1.95e-39)	0.168 (5.38e-10)	0.329 (3.35e-28)	0.711 (1.05e-63)
Fraction in ERFS	Avg.	-0.018	0.034 (0.235)	0.0412 (0.581)	0.0051 (0.183)	0.0474 (0.476)

## Sheet: 090 TUs
			Transcription unit length
score	aggregate	r	<0.2M	<0.4M	<0.6M	<0.8M	<1M	>1M
No. of transcription units			13.9K	911	200	52	22	12
Fraction in genes	Avg.	0.439	0.608 (~0)	0.803 (~0)	0.887 (1.86e-226)	0.899 (2.09e-82)	0.891 (1.35e-30)	0.977 (1.15e-34)
Overlaps CNV region (%)		0.053	3.5 (0.621)	5.05 (0.596)	10 (0.0102)	15.4 (0.0131)	54.5 (1.29e-07)	91.7 (~0)
Fraction in CNV regions	Avg.	0.059	0.0303 (0.497)	0.0287 (0.636)	0.0557 (0.027)	0.0678 (0.0358)	0.282 (~0)	0.584 (~0)

## Sheet: mES TUs
			Transcription unit length
score	aggregate	r	<0.2M	<0.4M	<0.6M	<0.8M	<1M	>1M
No. of transcription units			18.6K	609	113	20	8	2
Fraction in genes	Avg.	0.377	0.462 (~0)	0.827 (~0)	0.896 (1.63e-193)	0.955 (1.77e-62)	0.983 (3.19e-28)	0.999 (4.87e-09)
Overlaps CNV region (%)		0.041	1.11 (2.94e-15)	5.42 (0.000391)	18.6 (6.31e-16)	30 (~0)	50 (0.002)	100 (0.004)
Fraction in CNV regions	Avg.	0.047	0.00882 (2.2e-15)	0.0194 (0.159)	0.0497 (0.0004)	0.0901 (0.003)	0.252 (~0)	0.525 (~0)
